# Supplementary material for: Sorting nexin-27 regulates AMPA receptor trafficking through the synaptic adhesion protein LRFN2
Source: eLife journal article supplement (doi:10.7554/elife.59432), 2021-07-12
Supplement: fig1-data2 [file elife-59432-fig1-data2-v2.pzfx]

<?xml version="1.0" encoding="UTF-8"?>
<GraphPadPrismFile xmlns="http://graphpad.com/prism/Prism.htm" PrismXMLVersion="5.00">
<Created>
<OriginalVersion CreatedByProgram="GraphPad Prism" CreatedByVersion="9.1.2.226" Login="nskjmm" DateTime="2021-06-17T14:57:24+00:00"/>
<MostRecentVersion CreatedByProgram="GraphPad Prism" CreatedByVersion="9.1.2.226" Login="nskjmm" DateTime="2021-06-17T15:00:22+00:00"/>
</Created>
<DefGraphButton ButtonID="201"/>
<InfoSequence>
<Ref ID="Info0" Selected="1"/>
</InfoSequence>
<Info ID="Info0">
<Title>Project info 1</Title>
<Notes/>
<Constant><Name>Experiment Date</Name><Value>2020-09-22</Value></Constant>
<Constant><Name>Experiment ID</Name><Value/></Constant>
<Constant><Name>Notebook ID</Name><Value/></Constant>
<Constant><Name>Project</Name><Value/></Constant>
<Constant><Name>Experimenter</Name><Value/></Constant>
<Constant><Name>Protocol</Name><Value/></Constant>
</Info>

<TableSequence>
<Ref ID="Table42"/>
<Ref ID="Table41" Selected="1"/>
</TableSequence>
<Table ID="Table42" XFormat="none" TableType="OneWay" EVFormat="AsteriskAfterNumber">
<Title>Fig 1F SLC1A3 IPs</Title>
<YColumn Width="125" Decimals="6" Subcolumns="1">
<Title>GFP</Title>
<Subcolumn>
<d>3.664122</d>
<d>11.61952</d>
<d>0.622592</d>
</Subcolumn>
</YColumn>
<YColumn Width="125" Decimals="6" Subcolumns="1">
<Title>SLC1A3 WT</Title>
<Subcolumn>
<d>100</d>
<d>100</d>
<d>100</d>
</Subcolumn>
</YColumn>
<YColumn Width="156" Decimals="6" Subcolumns="1">
<Title>SLC1A3ΔPDZbm</Title>
<Subcolumn>
<d>3.01919</d>
<d>12.26151</d>
<d>22.51539</d>
</Subcolumn>
</YColumn>
</Table>
<Table ID="Table41" XFormat="none" TableType="OneWay" EVFormat="AsteriskAfterNumber">
<Title>Fig 1F SLC4A7 IPs</Title>
<YColumn Width="125" Decimals="6" Subcolumns="1">
<Title>GFP</Title>
<Subcolumn>
<d>0.166877</d>
<d>0.963163</d>
<d>0.036913</d>
</Subcolumn>
</YColumn>
<YColumn Width="125" Decimals="6" Subcolumns="1">
<Title>SLC4A7 WT</Title>
<Subcolumn>
<d>100</d>
<d>100</d>
<d>100</d>
</Subcolumn>
</YColumn>
<YColumn Width="156" Decimals="6" Subcolumns="1">
<Title>SLC4A7ΔPDZbm</Title>
<Subcolumn>
<d>0.089951</d>
<d>1.821477</d>
<d>5.14805</d>
</Subcolumn>
</YColumn>
</Table>

<!--Analyses, graphs and layouts as compressed binary. Don't edit this part of the file.-->

<Template xmlns:dt="urn:schemas-microsoft-com:datatypes" dt:dt="bin.base64">eNrsPQlgFEW21TOTZGZyhwABOToIAgnk4goEzAQQQUUjRPBaIYEBA7nITDglROVSxE0UV7zj
sbseH+SSY1GJrHIEUXFRcVHEixvFVRFFmV/VXT1dXenuTM90wgS7oDL9uqpfv/fqvapXXa+r
c4eNGHH1mJy+TFUEAKCaqWZM8O9kcLPpWXAnPLPQDCQJwQz8NcFs7wp/4YETlABf09VgqOx5
U1VedwAs8CgW5qkwh8D8E7xVT8DfsQ3MHpgAvruQAS5PAnxdX+5mJCMZyUhGMpKRgjcxhgiM
ZCQjGclIRmrRCc3fWxtiMJKRjGQkIxnJSEYykpGMZCQjGclIRjKSkYxkJCMZKeD0jQUAMxcD
d6oVALvaATDGDMB1lsavjPIeoZC7MQwDQvjVeAt40sebP3mRmA6tQmGBYfCfGPyXU16YX6Ry
TX8gXZyo5iMPzCamC8bDBz2OnVNcUKqCKAvmjrJ44jAePmxxfGHJ1MkwuxTw9IM5WRaPCePh
4zLzCoudLvZ65yx2TGlxfoksnlaq9PC6MM5ZPjm/JF+Rr+4wx6jKJ4Q7MSy/qLCgvFAVT6wq
nlDuxEhn0Uynu3BSvo9tXk1EioQ65nNcfZcIQCV3hAJVVwArLv8LECCGV28PD5kkkFkCWTC0
jDtKgPkRsD9MDEr1n1ppMgJWjWQkIxnJSEZq/oQG5ieA4B/vADNNgqdlJCM1ZzI5Blbxrzd9
w3mmX1bZQDf4e1NJWX5huXMy62bdTpebLZ3CjiicyqaPYMdeNyw9pw87KtcF7KAXI53rISeV
MVV536AyEuBkxBt9FRjETW++x8I5jyW2GfTCzr+NuhbW9MTKTgCFzmMwd60d5gyMTSn1weVW
9i541EnDFXqnIfiNulrvhAjlE0CgCwDx7T8zlkwInrTB2RB3lQ1zHQ4zeqcwEj9NiMZTSCS1
ODwtjcfTbjSNaosnVu1gbg/zZTB3wNPpbMDiO5owBSA03qvXLKbMweHPyy+oKMovZ8udrooi
t4u41pus4tTP5L2Wwypf2aSlsllLZYuWyiFaKodqqRzWWGUGZxY2mRU3jFUi9qtc7sLifHdh
aQmbW1TqVriRTf5Gdlausp2qHM6qVA7XUjlCS+VILZWjtFSO1lI5RkvlWC2V47RUbqWlcryW
yq21VG6jpXJbLZUTtFRup6Vyey2VL9NSuYOWyh3lK48AI2EHE2q1ADbK8A2MZKRLaVIrN4n1
10ucAN2WCZzX50vt7xcE668gkwnYk52AYew6LfA3Ixz7OUwveecPavMucjXAtytMmq8wa77C
oMqgyqDKoMqgyqDKoMqgyqDKoOrPQlUkOxs/jQbEw0/01LArfordi3vCz8MMEIOj0GMbfiHm
vRW5w28tKGZnulKEpZnxeV58Rzqve3XVbe2zhblZKMHlQMeXeOlnIlgzH4Ae86US2MiIaxeg
Ea70nkeSsW+vwRPJBB1zIPMb4wBgrxo9AtVGdJ80A0CHG1aFAZAJT/aD166iyqybLGDX8yaQ
iB8wx2K5CysLMQT/4RTcBtdNwCsMEZjm1vjYjFcmyEC2TkQ7k7JtB7xPiblltwhM+nXwz2QV
GQjXJ4IzJMfZ8sfyibyfIAeSH+GcQOOZM2dMSLOuk5nbc6TVVeWc7laVQ97jOiAuayB4K6w4
CJ+ncSEeBwr6qYArTgFXdyxfQUR17+w2kTwyBB+ozF8+tuAbqPHhC644BVxkm/QgaO8i6olH
rq3aiNeBMTCXMfz57yibfR13WCgScjQYC1iY80EJcHFHTlAOCsEUjLO7zLObiSOzk7oTbVBt
XfXyJEIvG4b8xuC/1dxvfeQdHJ4PIB0xd8SAN6Ku9cKJ1zKgKuSjdQhfWfjMWvRb1ZG/n9Ce
ItZqSZ8kFL4RlXgt+o3ImbPyjwUiTKeTKVmPkfV3bkkCvywQy/fUnnwUXV+L7w864V/iPpNn
8mtTpI4JsjfJyF4IxzRkr7/sTUR/VUC0RyxxfC3RJ4cQ/bWFOoaDCreihHDlXZ+bGwovvhEe
Hwb8Il00Ho+vIGAhJeCcC3MaMmJudOXTYvCdt7wHUZdpZP85JOYwmKM1/qbCvABmD/7NFuAT
L4MFdRAvZOgv8Deziudvg1kbf10h2W6YHVgBdoClCvxZG/CUTfH37boh4MiGwTAPAV9tHgG+
WTcYHP/XSHB0Yw74dv1gmLPAyS054Ag8Pvn6aHD+43ngpz1TwTcQPrppKDj1Zi6sPwp4Pl8K
PJ8tAT/ungR+evdOcG7fDIgb1tk4FPy8dzo490E5eOtpJ8jOOwt+frcQXDi4EOIeAl6srgKO
vJ9hPgt+/bACHN98FTi92w0u/H4WfPHVH+CZl34D23b8Dk7X5YGTb08Fv/9yHJyBdP64uwAc
33YbOP+/z8EPO+4Ah9blgldfeR8sWP4rOLBlHti58wjY8Pp58PL68+CR2t/AhfNnIb8XQP37
vwMGpa4NEzrdqWtycnL/rOTkQf3xQVZXvj7MSckM0zMJHyTj+vLnGYQnaVBy8sAkfJCF6ydR
qb+f+JXqK+Hv2bNn0sCePa9MwgeD1PFfPjglo1/mEOl5C9OxS/fe6X0HZEr4sttstsQreqX1
6duPvG+qLS4hio2Pj09Lz5DgscW2jUepV+8UKX67rRs6f0X3HpLzlvad0Wk2scvlZHu1a39Z
fHzrDvFRto5MJ+If0yoqvnUbW9sEGyNJ4RGRUdHWmNg4m0VaEMqEWW2MzWZnqGQyo5oh1Fm6
nwpjpH4COS4leP2DOq8vmo77QeSHdCR8CIbyLS6jfFnS10C+z4swr8W4BjD8KjHp+whl0ZSf
RPpKyN+/CY6FZXBELIQjoRN6vyxwc9kJR0g34GMeInAOxzjDiHOhQIwSCsHn7PhYjQc0Ljhw
f43qssRcLEZlPiTA5BiUQOAl5dwRy7lfgHLehHGlwwv6UnIWyhqTcx6UcQGogHOsfChplpO2
i4PdwEXILRxnC4ZJ+YbjeZJQLsSuNaWcSd3uQci8RxPNWVAahOkdL+Pro7JUmMf5MGeRw9Vc
cxbh3owKH0AjHyQuPWhMVZF1qkZZy+HSU44Ib5aKPgzSqA9ZOtM4TkVnx2nUWRqXlvkprd/H
li5V1G9U1pJ5Loe/tRae32zifgKc4H3+42Eae14jTBtRX436+Fo8uYvB/WQPIB4zsBc1y0/+
ECbh/yWVJk2aVOl0Oj3Tpk3zTJ8+XTajcjUcU6ZMqZwxY4Zn1qxZntmzZzfIpaWljYoN3r+y
oqLCM2/ePM9dd90lyS6Xyyexl5SUVM6dO9dTVVXlufvuu70Z0eCrPCANlej6xYsXe5YsWcLl
yspKTc0OeahE1y9btszzwAMPeO69917NagPprkTX1tTUeO6//36/1G7RokWV1dXVnuXLl/ut
tvDelYFcjxK8vvJSshnymeAplWeCOdxTqHyu7+mT1oZ7LmMhnsv78lyKTrmLpHDZ8DdenCR5
5DGae97UK7P08T8WiLDQt1fh+jSe9Sf6rCTr7x6ejT7OA27+8IvnELzPZt/E03Q9Vx6+hccf
xc0axDWGsomfcPVPPnTiUQTHz/yUg9eElXP1b4+1n0F4hOdS7FU8vyvfLH6e5OPAuuLn5Z4J
tiHmJ7R/enbXroDGvfF4rHLLjHvj8Tjk8nHco3EJ47dJYfw26Th+j8c0KvEBNPJB4tKDxlQV
WadqlLUcLr3k6FLRB5dGfaBxyflBJgXfT5gHbyou5mjIw3hvBfzzgRkUDQm4jMH3ssjoZC6e
S4dT91Szr0Dnf258/xoZebqxPKt9lCeNi7Yvev5n0nFO4MY0KvEBNPJB4tJr/qck61SNspbD
pZccq1X0oVqjPtC4/LGvexctl9jXLGxfD8rY1ywZ+yLlhOwro5ntqwbff7WMPGuwPFf5KE8a
V3PaVw2mUYkPoJEPEpde9qUk61SNspbDpZccV6nowyqN+kDj0sO+VmD7ekXGvlbI2BcpJ2Rf
fZrZvlbj+++RkedqLM96H+VJ42pO+1qNaVTiA2jkg8Sll30pyTpVo6zlcOklx3oVfajXqA80
Lj3say22r10y9rVWxr5IOeXi52XNaV978P2PychzD5bnUR/lSeNqTvvag2lU4gNo5IPEpZd9
Kck6VaOs5XDpJcejKvpwVKM+0Lj0sK/3sH19K2Nf78nYFyknZF/9mtm+jgnrhUxDeR7D8rQw
vsmTxtWc9nUMy1aJD6CRDxKXXvalJOtUjbKWw6WXHNH9lfQBlWnRBxqXHvZ1EtuXiWloXydl
7IuUE7Kv/s1sXyFYBl1k5BmC5ZnoozxpXM1pXyGYRiU+gEY+SFx62ZeSrFM1yloOl15yTFTR
h0SN+kDj0sO+rDi+qLOMfVmZhvZFygnZ14Bmtq8u+P7ZMvLsguWZ7KM8aVzNaV9dMI1KfACN
fJC49LIvJVmnapS1HC695Hilij74iitOAZce9tUN21eyjH11k7EvUk7IvjJl7Eu4pxAPt5WR
j59rbK0sEFsU7jnXxMfIBSJ7OVzNZYtbcfvoxQeNS4sONRfPc0z6tZ0crkDtRo2G9iZxYzPB
bmj9QXbDYp0n70m+S3JK5V2SlrBmbx3C/5qo64U1+334tcid6wV8ga3Zz2lnv8/fNXsyjreu
rq5BP4REFoj9dsRtP0gH+6VxCTZpVrBJs442qRcfcrjkbNKs4reRcdfkeKJnvIXwnh6ic7wO
bUfjotuOjrcw6xQnQN47S0c+snSMZUB4x+koaxqXL/pFj3NN3S5zTPrplxwurTalFsvR2Jg3
RGbMI+lRGvPk3ufTq98dj+/v1kGfaFy0jghDHakjwahz6J2Ucp3kIocrGHmebRLbryJAnuVw
abEzIB27TG1kxjGTj8f+vle0oRG+34LALYB/l1aw57ewDbhNfJxYGUDvzRaCqdCq0+EReqP5
OjAMHueAPhAaBS1eeLfIgueIwntEQn8TieEo/BtJ1BPK7Y3woyRXvfsSN27zGh36EhpXU/cl
vx3ar2hXqCwQuVTrKBcaVyA8n160RJFnVBbImK2XLsjh0sKzXrpdg2lYrUMb0rhasm6v0lEu
NK5g1W29dEEOV0sbJ1f4ME4+jK8hx8kaPE6iNkd7+pAj4wpzLhgObgUFoFhx/IsE4tcNhHef
Y4JkHFyN23SPDjZB42rJfUW9jnKhcQVrX6GXLsjhaml9xUQf+oo1mAeyr1iN+4p6jGcm9JpT
gPi1k9Agsfs9uH2O6aDfNK6WbPdHdZQLjStY7V4vXZDD1dLsfqEPdr8X2zNp93uw3R/FfYd0
9jyew602P26F6QiGvuEYbsMQJnAboHG15L4BxZvpJRcaV7D2DXrpghyuizE3DsFy76JDG9K4
WrJuJ+ooFxpXsOq2Xrogh+ti6HYXTEO2Dm1I42rJun2ljnKhcQWrbuulC3K4WppPV+aDT4f2
wgylfDrEN/LpUJvfzMV5p8CM/qVL1j/I7I//5uv6aSDxcyjGbxCx9knqhFD2GuPbHktyuJor
boW8d5YKH4M08qHnHl4I7zgVWY/TKGsaV7CuQyvplz/r0IP84LmpYg+EvcSEtT66Pcfj9nT5
2J40rpY6tiJeXCpycWmUC40rWPVcaL8KHfScxtXSxtZawL/zhOILtsJcSrW1UBZFjK39KZu5
Ewh7mhYBJ2BBDijhomHngLncPrIRQLqXaTgVT0DucWoLcCzWu99wE+uotH24sQyqfbQPGldL
7jeqVeRSrVEuNK5g5HkLo6wL/vQb7gB41ku3a4h1P7oNa3AbrvKxDWlcLVm3V6nIZZVGudC4
glW3lXTBH92u8YPnYBoT78JjHIoluB+g70o1HBMfxm1EjomkzdwO8zA4mhZBz6AYjocshKKo
sS6GWFOMCpLxbjWxJkjr/mrMX72Puk/jasl9Qr2KXOo1yoXGFax9gpIu+NMnrPaD52CLJ0A2
jmIGrgfoWysN+wQ6nqA/ZTPBGk8g7N8jrPfR+r0H83DUR/2mcbVkuz+qIpejGuVC4wpWu1fS
BX/sfo8fPAejL4BiBu6D+WsZu98r4wuQNtPQFxiq6gtEBkmfcIxYJ6V1/xjmz5e9XuRwteQ+
AfGsJBdUpkUuNK5g7ROUdMGfPoHGdTHmviGMuE5Kt2EIbsNEH9uQxtWSdTtRRS6JGuVC4wpW
3VbSBX90O8QPnuXGNfqbouR5X44D+cYVGr/Qt8zegr+dmIbjHSqLpsY70mb8/ZaYFUjfRwsj
foVnwmEaxka9+4wuuG2zZWyjCyN+I9gX26BxteQ+40oFuWi1HzlcwdpndNGJZzlc/vYZpiDw
l6txf4DiMZaDhvYglIVT/YdgP6j90Ts6LP6XC/NMbjWpAvYd4ruo5DupoUD6LTy7TrEc5DHq
r+Jx/Rh8bOMkdlNJWX5huXMy62bdTpebLZ3CjiicyqaPEL4GPyrXBUlCGy2Nga14nUVUEGCq
araPureEJH50sAoM4sQciz+edR5LbDPoBcSPHZIpFmc6ZXFdA0KM9rkZzF2PFCQDNNyUh0x9
cLmVRVPAThqu0DsNAe05o9xMdC1biONaMBIbLcqbqQ6ITlsaKb+SMycksVhwAgi8AyxDE+6K
LED8FGUY7n5thOlFAPGVuWhsMrG4K2mFzac1NsO22ARR19wemy3aFgttSZPNbVJhxnfm1CM0
3ks/iylzcPjz8gsqivLL2XKnq6LI7SKu9SYrjwNda/Jey2GVr2zSUtmspbJFS+UQLZVDtVQO
a6yy8H1QFjaZFTeMVSL2q1zuwuJ8d2FpCZtbVOpWuJFN/kZ2Vq6ynaoczqpUDtdSOUJL5Ugt
laO0VI7WUjlGS+VYLZXjtFRupaVyvJbKrbVUbqOlclstlRO0VG6npXJ7LZUv01K5g5bKHeUr
jwAjYQcTarUANsrwQYxkpEslMXQn0Ijv11iaAN2WCZzX50vt7xcE668gkwnYk52AYew6LfA3
Ixz7OUyPeTcA/Qc3FjJiL8xlVPpPMJ9qnwsQCRrAc9mZ+UUVTrYHP6XsGbAiHOm87tVVt7XP
Ruxf8IDY+fi8SAJDkeBmy5FPp58uRow4Ff3X8FQHTwIjQ4KJImEM65pRkQ9n1nqRcP6PWw8M
nPs9loJJhgQzRcLwwilTnOXOkklOtsDpnuV0lrDFzvwSl98k3Nih90+rP72pjifBLEOChSLh
utJZznJ2UmnJlMLJHCFFhcWF7gCksOT5Ncsytt+CSbDIkBBCkXBTWZm+JFz2yEu3J/9wIyYh
RIaEUIqEEXqrI9klXPCEypAQpmSUI3QySpKUC54wLwkveZ9xkM+GBBLIvh1ousKk+Qqz5isM
qgyqDKoMqgyqDKoMqgyqDKoMqv4sVEWys/FKFiAWTtCKQ1e8AtaLW4HkYQaIi9PokS+/WPze
itzhtxYUszNdKcLy8fg8Lz5hGs8QsySByy8dA6v4NbJvOD6+rPJhebpvzgCV5WnGWJ6WXZ5m
vMvT30PhMD4tT3+PZ5ENl6eFCb+4NN23kUd0/RosTft6hf5L07zJ1HIPtYQlaGPZ2Fg2ppaN
OxrLxsaysbFsbCwbG8lIRjKWjY1lY7llY/lJp1z7qE9T6WTSfIVZ8xUGVQZVBlUGVQZVBlUG
VQZVBlUGVX8WqsSlH4bIob4v/fTNGUAt/aClGWLpZ2/9W2kvuB+5Um7pZ6DjS7z0MxFsng9A
2nypBDYy5Kt1oNnWdNAtiwhYeD9aSHMg8xvj0LfhR49AtRHdJ81iCKSQqsIAyIQn++G91STP
pzZZwK7nTd53vWPxKoKwshBD8B9OwcI7oAlA+o5rayC+c2sH0ndIOwFxiY+ULfmOOfn+LnrH
dbKKDITrE8EZkuNs+WP5RN5PkAPJj577kAu6I3xPWu7dZ8TjQND4e/ByuLoTdsRdTu1DzgB9
9vjegm+gxoeWd7hpXHLvcKNqcu+tk21Fvpc8BuYy/P70d5TNvo47LLOJ6TIajOW+95sPSoCL
O3KCclAIpmCc3WWe3UwcmZ3UnWiDauuqlycRemlpoGUx+G8191sfOZHD8wGkI2ZiDMiM2eKF
E6FAHNa8DQhfWfjMWvRb1ZG/n9CeItZqSZ8kFGbGJHIII3LmrPxjgQjTVJ1MyXqMrL9zSxL4
ZYFYvqf25KPo+lp8f9AJ/xL3mTyTX5sidUyQvUlG9tWMIfumkj2593sB0R6xxPG1RJ8cQvTX
FuoYDircihLClXd9bm4ovPhGeHwY8It00Xg8voKAhZSAcy7g96WoAuI3BReD77zlPYi6jGTU
lX1+CsJgjpb+eqLlz3t/U2FeALMH/2YL8ImXwYI6iBcy9Bf4m1nF87fBrI0/tB+DG2YHVoAd
YKkCf9YGPGVT/H27bgg4smEwzEPAV5tHgG/WDQbH/zUSHN2YA75dPxjmLHBySw44Ao9Pvj4a
nP94Hvhpz1TwDYSPbhoKTr2ZC+uPAp7PlwLPZ0vAj7sngZ/evROc2zcD4oZ1Ng4FP++dDs59
UA7eetoJsvPOgp/fLQQXDi6EuIeAF6urgCPvZ5jPgl8/rADHN18FTu92gwu/nwVffPUHeOal
38C2Hb+D03V54OTbU8HvvxwHZyCdP+4uAMe33QbO/+9z8MOOO8Chdbng1VfeBwuW/woObJkH
du48Aja8fh68vP48eKT2N3Dh/FnI7wVQ//7vgEGpa8OETnfqmpyc3D8rOXlQf3yQ1ZWvD3NS
MsP0TMIHybi+/HkG4UkalJw8MAkfZOH6SVTq7yd+pfpK+Hv27Jk0sGfPK5PwwSB1/JcPTsno
lzlEet7CdOzSvXd63wGZEr7sNpst8YpeaX369iPvm2qLS4hi4+Pj09IzJHhssW3jUerVO0WK
327rhs5f0b2H5LylfWd0mk3scjnZXu3aXxYf37pDfJStI9OJ+Me0iopv3cbWNsHGSFJ4RGRU
tDUmNs5mkRaEMmFWG2Oz2RkqmcyoZgh1lu6n0P5Kct/FYAC5V0md1xdNx/0g8kM6gsD2flqL
cQ1g+FVi0vcRyqIpP4n0lfzd+ymMOBcKxCihEHzOjo/VeEDjggP316guS8zFYlTmQwKssI+O
RM4dsZz7BSjnTRhXOsNHb5FyFsoakzP/zYUKOMfKh5JmOWm7ONjNfZdBkBv57QU7Jd9wIN07
R4hda0o5k7rdg5B5jyaas6A0CIjfbqF9fVSWCnz7no8cruaaswj3ZlT4ABr5IHHpQWOqiqxT
NcpaDpeeckR4s1T0YZBGfcjSmcZxKjo7TqPO0ri0zE9p/aa/zUPqdyDf5gkGnsvhb62F5zeb
uJ8AJ3if/3iYxp7XCFMm1FejPr4WT+5icD/ZA4jHDOxFzfKTP4RJ+H9JpUmTJlU6nU7PtGnT
PNOnT5fNqFwNx5QpUypnzJjhmTVrlmf27NkNcmlpaaNig/evrKio8MybN89z1113SbLL5fJJ
7CUlJZVz5871VFVVee6++25vRjT4Kg9IQyW6fvHixZ4lS5ZwubKyUlOzQx4q0fXLli3zPPDA
A557771Xs9pAuivRtTU1NZ7777/fL7VbtGhRZXV1tWf58uV+qy28d2Ug16MEr6+8lGyGfCZ4
SuWZYA73FCqf63v6pLXhnstYiOfyvjyXolPuIilcNvyNFydJHnmM5p439cosffyPBSIs9O1V
uD6NZ/2JPivJ+ruHZ6O9+sDNH37xHIL32eybeJqu58rDt/D4o/A7+sIaQ9nET7j6Jx868SiC
42d+ysFrwsq5+rfH2s8gPMJzKfYqnt+VbxY/T/JxYF3x83LPBNsQ8xPaPz27a1dA4954IH4j
jB73xuNxyJfv8MnhEsZvk8L4bdJx/B6PaVTiA2jkg8SlB42pKrJO1ShrOVx6ydGlog8ujfpA
45Lzg0wKvp8wD95UXMzRkIfx3gr45wMzKBoScBkDxP1daZ3MxXPpcCC/p21oE8z/3ED8Thkt
TzeWZ7WP8qRx0fZFz/9MOs4J3JhGJT6ARj5IXHrN/5RknapR1nK49JJjtYo+VGvUBxqXP/Z1
76LlEvuahe3rQRn7miVjX6SckH1lNLN91QDxm1+0PGuwPFf5KE8aV3PaVw2mUYkPoJEPEpde
9qUk61SNspbDpZccV6nowyqN+kDj0sO+VmD7ekXGvlbI2BcpJ2RffZrZvlYD8dtatDxXY3nW
+yhPGldz2tdqTKMSH0AjHyQuvexLSdapGmUth0svOdar6EO9Rn2gcelhX2uxfe2Ssa+1MvZF
yikXPy9rTvvaA8TvVNHy3IPledRHedK4mtO+9mAalfgAGvkgcellX0qyTtUoazlcesnxqIo+
HNWoDzQuPezrPWxf38rY13sy9kXKCdlXv2a2r2NA/FYWLc9jWJ6+fDNNDldz2tcxLFslPoBG
PkhcetmXkqxTNcpaDpdeckT3V9IHVKZFH2hcetjXSWxfJqahfZ2UsS9STsi++jezfYUw4nel
aHmGYHkm+ihPGldz2lcIplGJD6CRDxKXXvalJOtUjbKWw6WXHBNV9CFRoz7QuPSwLyuOL+os
Y19WpqF9kXJC9jWgme2rC76/3Pe+umB5JvsoTxpXc9pXF0yjEh9AIx8kLr3sS0nWqRplLYdL
LzleqaIPvuKKU8Clh311w/aVLGNf3WTsi5QTsq9MGfsS7inEw21l5OPnGlsrC8QWhXvONfEx
coHIXg5Xc9niVtw+evFB49KiQ83F8xyTfm0nhytQu1Gjob1J3NhMsBtaf5DdsFjnyXuS75Kc
UnmXpCWs2VuH8L8m6nphzX4ffi1y53oBX2Br9nPa2e/zd82ejOOtq6vT9XuwW3GsNWr7QTrY
L42L/pYpbZNmHW1SLz7kcGn5lmkokMZdk+OJnvEWwnt6iM7xOrQdjYtuOzrewqxTnAB57ywd
+cjSMZYB4R2no6xpXIF8H7ip2mWOST/9ksOl1abUYjkaG/OGyIx5JD38mOfx0GOe3Pt8evW7
4/H93TroE42rqb/D3VQ6h95JKddJLnK4gpHn2Sax/SoC5FkOl9bvcF/sb29vaITvtyBwC+Df
pRXs+S1sA24THydWBtB7s4VgKrTqdHiE3mi+DgwDfUEOGAChUdDihXeLLHiOKLxHJPQ3kRiO
wr+RRD2h3A78+z633n2JG7d5jQ59CY2rqfuSpvq+PeKlWke50LgC4fn0oiWKPKOyQMZsvXRB
DpcWnvXS7RpMw2od2pDG1ZJ1e5WOcqFxBatu66ULcrha2ji5wodx8mF8DTlO1uBxErU52tOH
HBlXmHPBcHArKADFiuNfJBC/biC8+xwTJOPgatyme3SwCRpXS+4r6nWUC40rWPsKvXRBDldL
6ysm+tBXrME8kH3FatxX1GM8M6HXnALEr52EBond78Htc0wH/aZxtWS7P6qjXGhcwWr3eumC
HK6WZvcLfbD7vdieSbvfg+3+KO47pLPn8RxutflxK0xHMPQNx3AbhjCB2wCNqyX3DSjeTC+5
0LiCtW/QSxfkcF2MuXEIlnsXHdqQxtWSdTtRR7nQuIJVt/XSBTlcF0O3u2AasnVoQxpXS9bt
K3WUC40rWHVbL12Qw9XSfLrZPvh0aC/MMMqnQ3wjnw61+e0A7eOdBudyady/dOJZjrAOQmZ/
/Dhf11EDiaNDsX6DiDVQUjeEstcY3/ZaksPVXPEr5L2zVPgYpJEPPffyQnjHqch6nEZZ07iC
dT1aSb/8WY8e5AfPTRWDIOwpJqz50e05Hreny8f2pHG11DEW8eJSkYtLo1xoXMGq50L7Veig
5zSuljbG1gL+3ScUZ7AV5lKqrYWyKGKM7U/ZzJ1A2Nu0CDgBC3JACRcVOwfM5faTjQDSPU3D
qbgCcq9TW4Bjsd79hptYT6Xtw41lUO2jfdC4WnK/Ua0il2qNcqFxBSPPWxhlXfCn33AHwLNe
ul1DrP/RbViD23CVj21I42rJur1KRS6rNMqFxhWsuq2kC/7odo0fPAfTmHgXHuNQTMH9AH1f
quGY+DBuI3JMJG0GzTuHwdG0CHoGxXA8ZCEURY11McTaYlSQjHeribVBWvdXY/7qfdR9GldL
7hPqVeRSr1EuNK5g7ROUdMGfPmG1HzwHW1wBsnEUO3A9QN9cadgn0HEF/SmbCda4AmEfH2Hd
j9bvPZiHoz7qN42rJdv9URW5HNUoFxpXsNq9ki74Y/d7/OA5GH0BFDtwH8xfy9j9XhlfgLSZ
hr7AUFVfIDJI+oRjxHoprfvHMH++7Pkih6sl9wmIZyW5oDItcqFxBWufoKQL/vQJNK6LMfcN
YcT1UroNQ3AbJvrYhjSulqzbiSpySdQoFxpXsOq2ki74o9shfvAsN67R3xYlz/tyHMi3rtD4
hb5p9hb87cQ0HO9QWTQ13pE20/g3xapy5L4pZgXS99LCiF/hmXCYhrFR7z6jC27bbBnb6MKI
3wr2xTZoXC25z7hSQS5a7UcOV7D2GV104lkOl799hikI/OVq3B+guIzloKE9CGXhVP8h2A9q
f/SuDov/5cI8k1tNqoB9h/hOKvluaiiQfhPPrlMsB3mM+qt4XD8GH9s4id1UUpZfWO6czLpZ
t9PlZkunsCMKp7LpI4Svwo/KdUGS0IZLY2ArXmcRFQSYqprt4+4tIYkfH6wCgzgxxwIPpz7n
scQ2g15A/OghmWJxplMW1zUgHD25UKBeWEH6goab85CpHy63smgK2EnDFXqnIaA9Z5TriK5l
PXFcC0Zio0V5HdUB0Wl9I+VXcuaEJBYHTgCBd4BlaMJdkQWIn6QMw92vjTC9CCC+OheNTSYW
dyWtsPm0xmbYFpsg6prbY7NF22OhrWmyuQ2azPjOnHqExnvpZzFlDg5/Xn5BRVF+OVvudFUU
uV3Etd5k5XGga03eazms8pVNWiqbtVS2aKkcoqVyqJbKYY1VFr4TysIms+JGsUrEfpXLXVic
7y4sLWFzi0rdCjeyyd/IzspVtlOVw1mVyuFaKkdoqRyppXKUlsrRWirHaKkcq6VynJbKrbRU
jtdSubWWym20VG6rpXKClsrttFRur6XyZVoqd9BSuaN85RFgJOxgQq0WwEYZPoiRjHSpJIbu
BBrx/RpLE6DbMoHz+nyp/f2CYP0VZDIBe7ITMIxdpwX+ZoRjP4fpMe9GoP/gxkJG7IW5jEr/
CeYT7YNqXIBI0ACey87ML6pwsj34KWXPgBVhb/1baS+4H7kSsX/BA2Ln4/MiCQxFgpstRz6d
frq4Knd7m+3luQ6eBEaGBBNFwhjWNaMiH86s9SLh0EfmI6Xnvs/mSTDJkGCmSBheOGWKs9xZ
MsnJFjjds5zOErbYmV/i8puElcOcHzsLb67jSTDLkGChSLiudJaznJ1UWjKlcDJHSFFhcaE7
ACkcTLhhe6cZt2ASLDIkhFAk3FRWpi8JN5XMO/F/+eMxCSEyJIRSJIzQWx3JLuGCJ1SGhDAl
oxyhk1GSpFzwhHlJeMn7jIN8NiSQQPbtQNMVJs1XmDVfYVBlUGVQZVBlUGVQZVBlUGVQZVD1
Z6Eqkp2NV7IYIqOZTFe8AtaLW4HkYYZYnEaPfPnF4vdW5A6/taCYnelKEZaPx+d5uRGm8Qw1
S0LpS4e1il8DtHGBL7nlpdOck9xsYcmUUjYdTtn4pWk4i3O580vcwpL0MTOfhfSCyXhsRkzM
vEvSL3ALm2lYOnYgRi8h4RUTeb6RgzZzqx64neiEHsuhaBtk8+yzYdKHV1xmVM8JBi+sjoIF
Jg5+ENyMOxHy+gjq7ugpg6BVjAx1QkcUTZ0/yt3vTswfDxVKoGkSaLoEKpJAxRKoRAKVSqAy
CTRDApVLIJcEckugCgk0UwLNkkCzJdAcCTRXAs2TQHdJoPkSqFICLZBAVRLobgl0jwS6VwIt
lECLJNBiCbREAi2VQPdJoPsl0DIJ9IAEWi6BHpRAf5VA1RKoRgI9JIEelkArJNAjEuhvEuhR
CbRSAj0mgR6XQE9IoCcl0FMS6GkJ9IwEqpVAz0qg5yTQ8xLoBQn0dwn0Dwn0Twn0ogR6SQK9
LIFekUD/J4FWSaDVEuhVCbRGAq2VQOsk0HoJtEECvSaBNkqgTRJoswTaIoH+JYG2SqDXJdAb
EuhNCbRNAtVJoLck0HYJ9G8J9LYEekcC7ZBAOyXQLgm0WwLVS6A9EuhdCbRXAr0ngd6XQB9I
oH0S6EMJ9B8JtF8CfSSBPpZAn0igAxLoUwn0Xwl0UAJ9JoE+l0CHJNAXEuiwBPpSAn0lgb6W
QN9IoG8l0BEJdFQCHZNAxyXQCQl0UgKdkkCnJdB3Euh7CXRGAv0ggf4ngX6UQD9JoJ8l0FkJ
9IsEOieBfpVAv0mg8xLodwn0hwS6IIE8GIrgJjBCEnxa5Hk4FqCIKKHUhv0UdLYcn4uuGoz9
H4ZY2kAus5M4thBejpXyZmwc3mF4jgLnR6Heoh+52ZIZz5o64LN/5T5oJUSxWamVVpOCMxXR
iONfjWeCD3lXcTdy9wkl6kRj3Og3Et+rA3YvEZXdMV0IQwq+J1pYG0SwHe3gRWZrRGRWVZEh
qsahpamA5BWis7ziKVwRXp7vw7XFNXIrnrv2hNygmDRf4qc5OZgcRvy0zGQVhVc2nKzasT6k
4yy4w08aE8OgzGm4N5mvYbJ6gZtmMnByY/I+zULnzsNzjzKmBpNV0npCZSerJqw584EYYy5M
VoEPk1UTkaWDi8Bnw8FlrTC4zHRwg4sNCKUMdnCFUuH6SO8HkdcTpU9iWiO9rwVtoDCLpRbs
EAulz0hKQwipoFKhp+b777XUan5Pov8W+my7jMT5/hvd+eoRuTK9twn33jGyvTfZSmQID53s
PvXejHc0WhcQN3bvs0z05DIQnmw68rQ+IJ4ivTxlc49ngS0min5kGxCrEQGzavayKnxVMMxH
VhkJqxwUCCsgYFZEv+g1ordrkayYZN2dCDYNLxT0JJyuUKwH6wkVXEccC05SUgMnKT2nj+Ek
GU6S4SQ14iQxhENUCaHzfjhJ5gZOEnORnKRNlCsTJnGSNis6Oib8BI92kvgudxM1UCa1QFdG
HEA2a+SGkXNlUPcaRK7MloB4ivTyRLsy8FRwuDKMwqA5GA+aSYSSCIuwWwh13Ewcb5IZQDOg
GNC7uqovbuMxdRD9UmnDVfNIPEsyxli5MVZt1Xwr3vdgmzGOXXIPIlDK4p5OM6rnhK5iH+Vz
82MsOruMafgQUeh0GhtjrcQYS76a5OsY+yHxlFs65d9H3SkD5ikw9xHCiBixKxTqdsTZOzUp
YITTDF7QhH3gKECJAm0fxzKOUcIWP3XmwyOF87kmB1W/iluwWsqs5OojthyWMu4YLRetNG3m
jtfCPy8yva5Bx7fAP3mmCO54Klr8Ds9tgPN2WNgj9Ax3LVrcSQir8x4fwMcfou1LLJkcnt7w
j9V+bpRwDMLPNcBZCM+fC+froCXTMxEizTGXiTSDKJHm28N6XUPj4WQZs3SUoAArY455j6ti
j436EQw2S5+EI4mzlMp8gweauEa6N7nrhA1S5Mo64XFSrqybD8/WWYJL4To0MWmlgHM4XpOQ
KxsL+Fei5cpQmEiyQhla6L9coWyzMARq5AEtznZSwPk1Hunlys6rlLWCJ1IVyobCE50VyvJx
mVYeqlRwPsMot9E6RrmN0AeMlNroAMO3kVY6zSY+clEOZ7xJ2R7ScVksuBEejTZxe2wUOdmc
kvyiOXOdk0EUwwwrLaooLmGHASvDzHSlALP31FB0inKyQDTDsDDhl6lAuARkXRXFxfnlc2BD
cqfHFk4tKZxSOCm/xF00h52MX8Zzsz1y2cFsWkpav57ZoDtf9YYSZ2+2tJx1zyrt7c4vLIJ3
xEizQWe+irsXO3kKsDHMyNJZbAH09ApdrPtOpxfvJFi1PV91tDO/hI+WxJzEy54fJpxXek+Q
7TGM7c0O7cmuZcdeNRok8bUH9utGvk1XWOJ2lkNSwWV8sfe9R7aH050vAD1RMf/qGesuhdcX
l8HTkMXywnyIxSVcPaIXO3xECfwzZXKTCHt4PqQpX1CASHxtfnEZ1AtX4VxnL1Fo7ZQLh6HC
jwy1MtRKf7WKjRkDVep6Q638VqvtvF4lG3pF6pX4zGMf8WhltElcJw0sdmI29kwFHzQOXtsJ
3q8bxpEO/Ynh0G8YC/2DadAPeAT6ZJux7/UOrPk19IvOw9yKSQE5TGcwkeF9mgXw92mmFfSf
o0Ed0xZ8wvA+hMkUC1qZOsLpeUewEfRggGRSFId5iiMm7J2ImBbBdw0Foj+KygT/E029BH/T
BkT/0g5EfzIciP5jJBB9wigg+oDRQPT5kP+OfLwUwPszOdj/QjROxMfxHMf8MdpY6Gnsh7XB
M4hoTFMdI+489gn2q7h91rCvhN7JaIX9HzRnSMPHyGaER3EfEmvk5CQwA58j43Z8nARu4yq9
2GASuJSLMq3yTgJrLfwkEE3Y6kzSCRt97QikZmbWe+1EK38tOnbY+GP0jDgmZCJXB8X8njMt
VcWZxS0xxowSjqvxMZrExliqueMNHJ21owQaquysKk50bXUIf+2NiLaINO44jZscAi/9h9sf
HqmGB6W6y2pHCscTO9SO1DYJbO3HJLA1UHayr1CZBPb2YQKllZZB2NCUJohKtFyrUjYGG6Zc
2UQgv/liIDzMwB2HXNlclbJ7VSbHf8MdhFzZyz48oNbKwwbcOcmV7cAdoFzZPtx5yJV9ittI
TzoP4xAXubJvcVksFy17THblOZZhJIsKEV7vSlw/ga4MHJbT0tJBKMMkJSWh0lugIwB/8rxu
ELAzjHtIer+UfhnI/xnSFw3Z6WnwQhACDzJS+nMHvTMHpPRNg+5vv5T+fdKRY9c7Pa1PShpy
NXoPSE8ZMADEoNsNzOwzAN1uFPReSgrdc3qxEG0Gqj8Y0xLG0ZIELF5i+gAG//noT8dxbAyK
ej6hzrGwShTZPCxvF3iObhqe5d26Y0B/t641/hsDR7Ew0Ivo9QfCnmcYPHcNzDfCXnYC0ZuW
wZ5uDsz3wJ5kBey9XiR6qXXw3NuwF3kf9hafEL3CIWixX8O8kYscjyfoao15ao1HQmFfccGt
64VHozCOKr5HRD3RMHwO9brX4GM7HqeFb5lMwKNAFODfELNh920OPkb3uwf3iKjeCkxbHODf
oLFjutbhc8hlexvjRq7a+5gWzmUD4l7wh3AP1QG7jcL+RWqhxn20LALSW5wai4CBLwIKgTar
gPji05NGoM0luQi4WWYRcLPMIuB+oo4YaLOfuqu9mRcBPxIWAV3ifcVAm48VS024m6JL+bnj
forKPnju6N2glVhApOsqxjYqv+6xXyYaRM/XPYTXUvYT0TcfUdNjgcW+QHyVxU6xKOzC1zD6
JkkSHXQjB+0aqnT8I3BQYStmBRVRgz/ixqlICSU25CbJnlaWdmQjQTHCvDPSh5imjxWk2s8n
qfoY/yMVNrLXwkE5DmEi3y11eI5wvKjzhhy9hB2Pr6Y969gYYXLdwANVlnmMjzKP9UHmnyjI
vL9PMm9HscT2Zgm9iWlP8yUpj8E3MRPRAEueX7MsY/stdYLC39ih90+rP73JC1/2yEu3J/9w
Y51e7cLiLoVkIrJ3pEhkAmqjROzoSniRVGun1l4dfGyvjqrtpezx9fXF48PvmxlhX0bYl+Hx
NUPY1wHZsK8DFzns61PFsC+a3r54IMiUCfs6YIR9GWFfRtiXEfZlhH0Z8TlGHIUR9mWolRH2
ZYR9tdywrwNG2JcR9oWnh2TbC5PAATJhXz5OApsi7OtGLuxLDKFyWMQQqioi7CuNCPuymhsP
+2KJsK81RNgXS4R9rSHCvmp9CPuqJcK+JhJhXzGRIs3sZY2HfYEOYthX7Z8y7EsppOgqlZCi
0Sp05qmEfRU0QdiXSyW06y6VskUqk+OVKmFf/9cEYV8bVcK+dqm00X9U2uhgE4R9faUS9nXU
G/bVMCRI2JWNDwkSt8WRBEHhHYBsalE4dExQ/34pAwbKxARlpPTp14eLCRo4IKV/P+gAp6f0
zeyLw6DSUzK5kKCBfVJgLT4kaODA9EACv/58PMfGoE0tT6nzLBv61ZRMbxe4jm4aruWduxPN
HPwVDt0nK7gOnh8L+9p8ok8th/3dPJgXwv7kb7APe5noqzbAczvgtfvgtZ8SfcNhaLff6hL8
FY77o+FA/ML3dUTw11gi+CufCP4qJ4K/5hHBXwuJ4K+/EcFfLxPBXxuI4K8dRPDXPiL461Mi
+OswEfz1rY/BX/20LAUawV9G8JexFNj0wV8HZYO/Dl7k4K/PVIO/PlcN/jqkGPx1kJq69FMJ
/joYePDXwWYK/jpIhMx8Rt1HYHGgTMjMQaXgL+8ukhc9+Et0ciTBX+JpZWnrGfz1uYJUB/kk
VR/3sWwY/JWVuXmIcNzziuPZwvF/Xn/B0QTBXxLvWhL8JfVBlWWuZ/DXIQWZZ/kk83YUS3xw
l6A3QvAX8eknslwu+Ev4fq+g8MInhQVY+LhuEwR/eZngo7owkXTwl8iLpFo7tfZquuCvnGoT
185DY7pQQ0gYED+mk+s9GhZjwQ9Ch+OjUHAVt+1ZTm5OFcYFfMQFvLiAFxf3m4PpitORrjhd
6Iqr4mcIvm8yGsWNGvwmoxmss7y8tJwtyC93sejJ/6SiwrIy6GHnu7lljPzZhS7+89Epfwr3
NwLkgFac+1Qeusz+kG1wdGtOTmZQCzJgiyDTTgER3DMqE5gMITMeB57mPvwTC8SN/JZYhb4l
kjLTyQ6xzxFHkRex+QvnLYQLNBnePYOguc4hEC+HCYA8R7z3ww49udnZFVydtUD4frXHs444
Xk8c13KfpxIoIa+44GmY1lHlPSnHbX0j5TXerk7oT8x43s0f9ccP6jO5eeVgxVY8ky30ICLM
mvneBWF9A7wJtmEMp0uLL78zMaaOr3mLQ4KorsAh+lZrOZt5nMNQB94C22VpUMYAMIYnOAz/
Bm+Dd8Dfufl5SONaqZpQHRFThAZMcnVImtiAMK2qoj+JJv9lRrX0IkdDY1829A2vXRNeVHuV
Q8oD4/O9GE338h1vuCa84TI8mHy+l0nTvXzHG6EJbwTFA3MJ6BJzCegScwnokukS0CXTJaBL
pharS92qFgP+83hSz2Nzp0Unb9xckl1lFnwPnmte/hnc5zul14i/JuK+5kY0bDFxPIvjEK1O
d+e0pAc4A3025GnxcAJzBqwjYKvpDFjPwYu8sw/ZlN3FezeesiX4dyn36wCrOM8S+QwpSk4K
71Ck5aDJQzcstjeVnSfItz3sVhWxdXU0bGiT4rPExsWGUiNiADqIIUxGDNsMMSwG/Jcjpa5z
Xkjb/b1/3ZYtOs9KYhjlaNh1CQKI91MMV0jEYFE0it8bfPk3MHMCpACVcJDm9Bz3TCuU8s4t
1YioPzhx27BmCOKPb8BWb3yVTda3d8C2ceT4Pu7pOToGdoWgXG+pztPWWLTZmKBcF8vGgL82
tt0Qw2LAf3pWbpZel82LQVtXY2pU0wMUgx4dhpwY3tZVGy72wOO3NrzzZxdDAueItyamIl24
URNDHruXneqcy7mYW3uDKYlQnuj90Ajx/BqwVZ24etNCztscdnPcgyGd7R3sX8Tyj1ZzotF3
eRdi8g9y3xW3Ep08+b0eMp9profCkkdciXhVBp0SzseD2ZJVad8GLkZFTVgHLzMbeDo0PHpx
2MTo7aGp0QVhg6NfDm0bPTcsL5oBaX7ILO2iyKxHVTX3AJeBExIG0owengur5WtkBvJTxbeF
PTXt5LbMyNm7P+/+W3YEVGeTBDt9BVp4jgG1IBdMhkjP8O6HVSy1yUylenpN7kkwEFLSToK7
KobkwsIRq/ao1vv8nZHMPeNVPDg6allYexRubMPGZcMZNFKfEjspJw+dBT3hM1pFQB6eA/9W
52A4BwtD6Occ4j1N3hWGHo40ryjTvUf+mITa82TRJB4MOxc+0zoxel1Yh4gx1sHRj4dZIqZZ
W6JJDIAUrGtgEnUXlLAIY9MtjhZuEvTiT7CYRG3tCy3SJCqt/4maYpsY/Zz1l6ihtsHR91u/
iLrV1hJNIhNSsL6BSXzwR8PrhcW78sqCV8bNTTRMomlMoqqqqgWahBVcH5oQjZzN8tDB0byz
OTiadzabyiSuDwUgAeLfaBN/ndH8eWe0PybBu9s2yRN5m1d7HDlJHB9vYIfdTLQ4ruFoKsfU
yjnzT4ROjEbO/CwoW+TMo19TC+pyfJNv3UWQrwm8E+KwDbMPtR8PmWzrbO9kZ0LvsoXZQ6Gp
Z5ixfFnf5ZthVlnObzL5inbepYEnzDScUHmviwepHId3efg+Yyksm8Hx2RfXSK5CUU4ruYdQ
scTT415c5E2D6Kfe+FUpC751FNfQa/oDbpxBHSgKVEvBi0AooCcUTId/k/1qYBGvWgNnhW2L
3WFdEzch7OvY56wPxM0KOx97v9UdJzawRVMDW1pgA28y8Q38igntG9+wgR/jGjhU0sDoUffN
eYXuIifdqhFcqx5OaZpWFfGqteq1lhz7ayGLo0stTntNSEH0Est8+5yQa9Cww2CzdWjoFhng
uBYSshhej35zoPm/FiL+ovOl6IVO/OuE52tCxF90fgk8fw3+nQ/PzwkRf6+JVm7VhWZ/W9WC
zTZGwWwf51o1A5gWiq2KgtrGXn9zxgC2rLzU7SwsYfMLKkomo80HIsudRfnuwplO9ArZ+Dy0
uYG7vLSI7dGtZ28unE3wuRpqQCjHxcXQg52eRz29mDHMcc9Wj51JgdX3e/4H2jCEdVs1WbcV
hSauhOVcGCfMO+Hxjfj3UfQ2BdqeD/+i+x2Hx8IvOv8/gGjgf9tg8lvj3/3c/eX14AG7v3pw
D9aDexT04AlOD8KAibBu9GzylnRs3o01LiKtORs3wVHFRdkuZe7mqEoCQ0HRkxwS5DbcA9hQ
dffUl4Ur8skinI8iBxzs378fTJw4kYPR77Fjx7jjllTnUkxG+xjJSEbSkk5VWfBjn9PckxJh
sOkrPB8ykpGM5HM6DdB7VeRDFc8lODobdYw6Rh3f64hjq4kYWw1JGXWMOv5YkdmwIqOOUSdA
K7IY8zwjGcnPeZ5gRSGGFRnJSAFaUahhRUYyUoBWFGZYkZGM5Fc65ahy3OuNIBM3f3ve+04Z
/0T/BW6bOX5bPmniYUeOWMMKpK8e8+HddY4x1gHw9K0z84u6w19XAgCz/3t63F9uOJgWX/Hr
3JWLHY52S09Hs4eqHfbXX1j43KhXxr30cMINNz2+sqD9V/Wv5W7dtvNkp/OvL1izbc2pxzMf
+XHUPW8/WvZCj9VPub7/+YeBA4o//++hLkN3fTp0V/vDuzMe2Lbx/XfT21WM3nHqvpDUDYfv
uGfR8yEL3439tV/0pLGPeZZ9+GOXY4n2e1dfnZO1uTShw1+3DBtS/9wH/W5evOsr+60HZq26
9qtlR5MjH7H2tB54es8VdS8teunjgpeKPvn27XYP5E3zjLJPv8+6YPLaitkbb3h87+pfzbWL
Z4wanLr+s+Pu+7/bE/LBuE4vZg3usb3bwz+3m/Hj5lv2Xtt/w8Cd77769vGtMXvOu5eVb3+i
Zsx7K4e8nvHAodrvp55MtppeODH0uaXnl5/L/PyZB7utd9nXj3rpyHvJISVL8zp9e3ThhNd6
/jBnROrvy9fN+/KOxTXv/H71wNS4x0NOzI59fd0vrW/+/slbv5j3yYEvjxd//+qi/Cu7vr01
OevzR4+taL9iy8qKc2//u2z7L9n3h5gPn7Z+tnBEt2e3LI/akG6ufA+0+bnzTeOz2h3Y980/
rn7jfz/bB17zYti/66+47ZkFJWfzDl9+IPyOB4YA++k/Xo8JPb3x1LN/PzO7+02ZB2tm705r
33/6BzOe77D8iRlF6b8Wtl7UY8lva2LvmJb1c2Z8nxGdV5dfHpVUvvv/dtww47qXot2Pv3vG
PSzjhqSHbhnR7sbUD/vv8/6bE/fEYM+EjwdMb7X30BNTb3it5Kaz+194fMjep6fcsH783W+8
PeBc9qQfuj14q7NkchzeXa+Nxt31rHh3PcPUQRW5u561we56bRrsrpfA7a73ZKO76y2mdtcT
k/LuegzQf3e9JCDurrcJiHvdbSaOtwCl3fXIK+R219vcSPmWRsprGmwkirK4u97VMKOPtKAP
vvi3u95THMYdYCfYhTEk2A9EjTj1Nb6i8b3xnuYw7Ab1YI+fu+s9w2F4F+wF7zXJ7npaMMnV
MXbXE2sbu+v5fi9jdz3fdcnYXc/YXU8vXTJ217v4u+vtaOB5eHfXM13c3fU2UbvrbaZ219vS
XLvr8Qik29rsVHSekNiszbqtHBLbRdpWbpchhsWcU027zvrsruePGABoli2v5IyiXnVG8afZ
AG2PIYbF3DxRfj55Ce8DZ5IRw15dtaHF7gP33p9dDPw+cG2AsQ+c2kMZAW7+feC2RvH7wH0R
xe8DtzOqZe4DdzWkYBPe4cekug+c8ADx4dKNW9KHdHdcovvAtaHOGfvA/dn2gRsJKdjcwCT+
BPvABatJtNx94CbjfeCW4n3gylroPnCjIAVbGpiE3D5wvUb2aTO6u9Ux59VbHztzb3/DJIx9
4C7uPnD6m4Rv+5TtMPaBa1L57g7WfeB6aNoHrkfzy7ep94F78hLfB05TA1taYAM3tg/cU5fg
PnCWO7XsA2e589LbB+5pYx84P6y75e0DN62RfeCeMfaBk69j7APXQpLRPkYykpG0JGMfOCMZ
Sb9k7ANn1DHqGHWMfeCMOkYdYx84o45Rx9gHzkhGutTmecY+cEYykl5WZOwDZyQjBWpFxj5w
RjKSf6l594E7yfD7wB2Ev1e35feB+/z67WkJvZ+7IyFyREzB/rZph+bkr5u9Pj3xipSHyp69
o+Yte96Ra66ZtPLVo6te/arPuw8WH/gjs3+rnIJRI7e+OmTCtu9/6rDy7HNP3Aaq9rQHJ6z/
nVdU+Z9p9WP7Ht+18NjG+v53ntq6t801V4FvbHOd5uot58KW7pw66u5HN3ToWvzvu7vemPn3
IUUFcS+krPl2dNr5zPYbIl77a69Zvz//UpeeIYznb2CBe+xNn/5j3Bv7jvW978pO14yZ1XfN
A28XPfh1FbjpwtDEr9vckvbdluRnPo188JbVa+a/uenmJ5PXfNXJWTD3r8fWLKq5qtXvf0Q9
9Mf873aG15xb3XlW9Iqx+9fGDf5k3n2rNr360dbvWp3aN/tg27A7Hn9q6ez37U9fd/29t41J
S2cLxx5ceGrx1Ojj9+Qffh585vjH8WHni357qv+Ruocth2/+Z3zc9GdXP9hqTavzW5btPfXz
v8p/evaKJ470v2XL5qKzsw9HH3CN29HJ/K//zpvtjvzvvp/W1v9w7sgrZYdqto56KP6pHrNf
nvz82vY7/vFw5/E1S07kL+s3tM9rroTFQ4ee+SopOT/38WuP9Pt4+8oNydevWBL2Y8knl69/
+uF3e9VbK5ctHC3+q3znij0LnH+57Qnr2Y+fHnLoX3M+/Tq69SnbWcu8e97ocOqqC/dmM0ue
fm8Jv3dbZpUJKwmKcsstL53mnORmC0umlLLpMhu3kTFYhm2CKvSnFxEJxcdsIdkwEhtLwe98
msF0+LcY5hKYH+bCq7SkZEcxF2VmwqMqb7h35bqqP2aKY4S+oYS721Wzy5zlhcXOEjc7PN/t
BKVcT5CRkZqakZaRBvjqDFc9Slp91HBYmeOKr2TiKqHgsetL3c6C0tLpDaqYuSpWUYekxRau
OFJyG2e5tE4IV8fGo3CXTiotkpaHcuXcCXz+ftAVs2B6wHMlynvfffdKObmJ/Wamw8y9g+EJ
MDGO/wcAAP//AwAKIbL1</Template></GraphPadPrismFile>
