# Supplementary material for: Sorting nexin-27 regulates AMPA receptor trafficking through the synaptic adhesion protein LRFN2
Source: eLife journal article supplement (doi:10.7554/elife.59432), 2021-07-12
Supplement: fig2-data2 [file elife-59432-fig2-data2-v2.pzfx]

<?xml version="1.0" encoding="UTF-8"?>
<GraphPadPrismFile xmlns="http://graphpad.com/prism/Prism.htm" PrismXMLVersion="5.00">
<Created>
<OriginalVersion CreatedByProgram="GraphPad Prism" CreatedByVersion="9.1.2.226" Login="nskjmm" DateTime="2021-06-17T15:01:02+00:00"/>
<MostRecentVersion CreatedByProgram="GraphPad Prism" CreatedByVersion="9.1.2.226" Login="nskjmm" DateTime="2021-06-17T15:03:11+00:00"/>
</Created>
<DefGraphButton ButtonID="201"/>
<InfoSequence>
<Ref ID="Info0" Selected="1"/>
</InfoSequence>
<Info ID="Info0">
<Title>Project info 1</Title>
<Notes/>
<Constant><Name>Experiment Date</Name><Value>2020-09-22</Value></Constant>
<Constant><Name>Experiment ID</Name><Value/></Constant>
<Constant><Name>Notebook ID</Name><Value/></Constant>
<Constant><Name>Project</Name><Value/></Constant>
<Constant><Name>Experimenter</Name><Value/></Constant>
<Constant><Name>Protocol</Name><Value/></Constant>
</Info>

<TableSequence>
<Ref ID="Table47"/>
<Ref ID="Table48"/>
<Ref ID="Table49"/>
<Ref ID="Table27" Selected="1"/>
</TableSequence>
<Table ID="Table47" XFormat="none" TableType="OneWay" EVFormat="AsteriskAfterNumber">
<Title>Fig 2B LRFN1 IPa</Title>
<YColumn Width="125" Decimals="6" Subcolumns="1">
<Title>GFP</Title>
<Subcolumn>
<d>10.88545</d>
<d>8.196777</d>
<d>5.618795</d>
</Subcolumn>
</YColumn>
<YColumn Width="125" Decimals="6" Subcolumns="1">
<Title>LRFN1 WT</Title>
<Subcolumn>
<d>100</d>
<d>100</d>
<d>100</d>
</Subcolumn>
</YColumn>
<YColumn Width="144" Decimals="6" Subcolumns="1">
<Title>LRFN1ΔPDZbm</Title>
<Subcolumn>
<d>19.06399</d>
<d>10.88178</d>
<d>0.453887</d>
</Subcolumn>
</YColumn>
</Table>
<Table ID="Table48" XFormat="none" TableType="OneWay" EVFormat="AsteriskAfterNumber">
<Title>Fig 2B LRFN2 IPs</Title>
<YColumn Width="125" Decimals="6" Subcolumns="1">
<Title>GFP</Title>
<Subcolumn>
<d>0.498532</d>
<d>1.843145</d>
<d>0.14177</d>
</Subcolumn>
</YColumn>
<YColumn Width="125" Decimals="6" Subcolumns="1">
<Title>LRFN2 WT</Title>
<Subcolumn>
<d>100</d>
<d>100</d>
<d>100</d>
</Subcolumn>
</YColumn>
<YColumn Width="144" Decimals="6" Subcolumns="1">
<Title>LRFN2ΔPDZbm</Title>
<Subcolumn>
<d>0.649582</d>
<d>2.836962</d>
<d>1.942505</d>
</Subcolumn>
</YColumn>
</Table>
<Table ID="Table49" XFormat="none" TableType="OneWay" EVFormat="AsteriskAfterNumber">
<Title>Fig 2B LRFN4 IPs</Title>
<YColumn Width="125" Decimals="6" Subcolumns="1">
<Title>GFP</Title>
<Subcolumn>
<d>3.883869</d>
<d>4.418631</d>
<d>0.451448</d>
</Subcolumn>
</YColumn>
<YColumn Width="125" Decimals="6" Subcolumns="1">
<Title>LRFN4 WT</Title>
<Subcolumn>
<d>100</d>
<d>100</d>
<d>100</d>
</Subcolumn>
</YColumn>
<YColumn Width="144" Decimals="6" Subcolumns="1">
<Title>LRFN4ΔPDZbm</Title>
<Subcolumn>
<d>7.187133</d>
<d>10.84156</d>
<d>1.138769</d>
</Subcolumn>
</YColumn>
</Table>
<Table ID="Table27" XFormat="none" TableType="OneWay" EVFormat="AsteriskAfterNumber">
<Title>Fig 2C LRFN2 MUT IPs</Title>
<YColumn Width="125" Decimals="6" Subcolumns="1">
<Title>GFP</Title>
<Subcolumn>
<d>3.425648</d>
<d>0</d>
<d>0</d>
</Subcolumn>
</YColumn>
<YColumn Width="125" Decimals="0" Subcolumns="1">
<Title>LRFN2</Title>
<Subcolumn>
<d>100</d>
<d>100</d>
<d>100</d>
</Subcolumn>
</YColumn>
<YColumn Width="144" Decimals="6" Subcolumns="1">
<Title>LRFN2ΔPDZbm</Title>
<Subcolumn>
<d>0.870889</d>
<d>0</d>
<d>0</d>
</Subcolumn>
</YColumn>
<YColumn Width="161" Decimals="6" Subcolumns="1">
<Title>LRFN2 (p.E786A)</Title>
<Subcolumn>
<d>4.532751</d>
<d>3.386307</d>
<d>0.538831</d>
</Subcolumn>
</YColumn>
<YColumn Width="161" Decimals="6" Subcolumns="1">
<Title>LRFN2 (p.V789A)</Title>
<Subcolumn>
<d>5.62306</d>
<d>3.674714</d>
<d>1.081958</d>
</Subcolumn>
</YColumn>
</Table>

<!--Analyses, graphs and layouts as compressed binary. Don't edit this part of the file.-->

<Template xmlns:dt="urn:schemas-microsoft-com:datatypes" dt:dt="bin.base64">eNrsvQt4VNXZP/ruyXUSyAUCRBTYiSCQAOF+SYAAKh88BU9KI1h7wQATjOQCmQmgQBIfCliQ
fpOWPqJfn8r/9Dtt1ZJWoSLoV+M5/XNJxEtPnz49T2u/6qcmEFRaFS8gc9bas9bMmpW1d2bN
rIwzdq+wmX1Z+7ff913vu27vulTcunTpv61aPFNrHQQAXs2rOdD/G+Aux/+Ce9Gd7yVBSMDX
Gvp1oCNjLPpFJy6oh3DDv8ES4X1Ha+V4gGR0louOanSkoOMj9Kkb0W8aOrLR4UMBx8bxUskv
DpiiEnRMRcc08L9j9TU72MEOdrCDHewQnwHXMJJIGZ9Cyvs0Wyx2sIMd7GAHOyRUuAEdI0nb
PNsWhx3sYAc72MEOdrCDHexgBzvYwQ52sIMd7GAHO9jBDhGHt5OxDx2PgVuVBLAiOfjbXxgc
OMND7lZpGqQYo+wgGX4S5sd/8iUxndqKhw6kob/g4L/FjTVVtRbvzEbHMObaa/AKSQ6tkOD4
Bz1+4/66dQ0WQGXoGCXEGUJwHMaxpqZ+4wZ0uE1wZqGjWIjjIDj+cZmVNXUut36Ha5u+qqGu
ql6IM9SSHr8urHY1bqiqrzLlazw6cizlk2LcuLWqtmZdY40lTq4lTqpxY5mrdqvLU7O+Ksw0
Jzj+9F+0y+Dq/QKAZuMMD1Q9BOnk+XeAXml+9fb5rxwhV0khV8nk6oBxlo+OH8Mf0/wDUvD9
yKm1B6zawQ52sIMd7PBlB1ww/0dgWslp2OqgNS072CGWwbFoXqu/rfC2UTN9s9UJqBoLd9Zv
rqppdG3QPbrH5fboDdX60pqN+vQl+opVS++Ypi+vqIIMmKSFNvVwHVVztAYmUNkBDBn5bb4V
So3WzQdIOFjWV4nEnoNJpO7v5N5FMX25wvYfzTvmG+9mkLalzyLMIc/T9Z3obLTEG6rDAoN7
gCOB9hA+LgKlCyA4+U80ND+dSApznYmOQaQjIQv8Q/5ySOtvCGmV5pFW93B0jCDtKnaY4E2k
NV0OOvmig1AAqXkBvdYJZYsM/MqqdU21VY16o8vdVOtxM+8GQnqw5ecIvGugiiM7ZCInyURO
lomcIhM5VSZyWn+RNXLoKMnSiTKkh4j9drenpq7KU9NQr1fUNnhMPuQUfyhDF0XO4CJn6haR
M2UiD5KJPFgmcpZM5GyZyDkykXNlIg+RiTxUJnKeTORhMpGHy0QeIRM5XybyDTKRR8pEvlEm
8k0ykUeJIy+FZSiDSU1PBj3LrhvYwQ5fpTatqA0baS1xLaq2rDVqfeHE/qAlXn+pTNaSmuxa
ck2qTi2RHhjjjwbSE4H2g1W7i3UGhPeGQ/qNJOk3bKpsqmyqbKpsqmyqbKpsqmyqbKr+Vaga
rG8lvdEOpvMT95KOJb3YRegoJdcaBMdG4Q4hww/zyqGK2+5eV6dvdU8hjpk1lQFe/lrxq/Hu
V4aW05ZZKsPjvEVvEr/PPfCfuwBu2hXK/7Na0HMB/fCkuhXJDnz7LbpRzNBx/42ItiEA+u0r
l+LYmO7epOASfTS0IjHORTdnoXePcs/STyTD2Z85oIB0L+cSHwL1K+Qw/Gdy18NJ3HziXxhE
aB5GzpOIX4IdxTaaxOdlewME+ohhHDnHpK9A/22wkAF9vwAusxyXi8/Fgf0elQPLD71Habx8
+bIDa9YKQcveIK2jdfF741oXs99YAUGnBr5+XvNrM77PY2Ee51H9NMEaYoI1nsiXiqjjf59z
sDxqDB/4WaR8nCQfsOIjHKwhJlhsmkxgaC8M6olPlFbDg+/BKnRs1vz33+ds9gWSXeFhkCvh
G6CjowrqwW2cuaARaowlMTUiU76P5bUVY46NZ/OChkvnDjF62Xe8bw7532v8jsitNnBylqB7
1ehuztcD1wVfx0CPncR4PZmHT+DfywX+79H0DKJ6Q/Ik+tCbU/B1/Dto8f2Hv2gJXvOhd0rZ
o2z8MyeL4JOW4POuI72P4PdzCv3f30x+gfnOhq1+zxSrY1T2DoHs6VhMW/bqZe9g8qt1THrk
MudfY/LkFCa/TubOUaFi+JMwVuUdFRWp6GVM6N/B76LLJqXxLcw1DfnkqAD/ErGt6LiHPNsL
7weeT2DiaiGlrrD3FNLQkS35W4KOFnT4yG85vb74JLR0IFzE0HfQ79xWP3/Hk+T4G4vI9qBj
EVGA0/CQCX/pfXgq5/h755kF8O7x+ehYAG89txTefmY+XDi1DLqfXQzvHJuPjjLoPbkY3kXn
vS+shKt/2gEfdW2Et9F194klcOl3FSj+cvC98RD4/roPPjy3Hj56+V749PUtCBvFeXYJfHx+
E3z6WiO89FMXlFdegY9froHrf/kewl4Av/S2wqLKj9FxBT77QxNceO52eO+cB65fuwL//dYX
8PgTn8OLp6/Bex2V0Pv7jXDtkwtwGdH54bl1cOHFb8HVf74B/zj9XfjbMxXw66dehZaDn8Gf
T+6AM2feheMvXIUnj12FHx/5HK5fvYL4vQ6dr14DDYexfQO+PXpscXHx7LLi4tLZ5KRsrD8+
OoqKNW1iETkpJvHF9zWMU1RaXDyviJyUkfhFXJgdIb5ZfDP8iRMnFs2bOHFhETkptca/ef6U
6bPmLgi9n6yNKhw/edrMOXND+MpwOp0Ft0yaOmPmLPa7Jc4h+Vl6Xl7e1GnTQ3CcuSPycJg0
eUoofoZzHL5/y/gJIfeTR47Bt/WCwpvZ9Lph5I15ecNuystyjtJGM3/a0Ky8YcOdI/KdWkjI
HDQ4Kzs9J3eIMzn0QaqWlu7UnM4MjQuOJBwzhbvL51NpWmg9gS2X8gP1g45AXXQayQdxPWQU
U4fQuLrFjVxdlq1r4LrPL9HxNMGao/l9xGzdhz7L5upJbF0J1/fvRGXhZlQi1qCS0IVqvzp4
jMOFSkgP+Ec8DCJHJsFMY+6lQnCMUAq5l0HOrXjA5cIikl/juDrTEsuxaA/Ra7YMymdwWTmP
InKeFaWcTxCsaeiFmZyc6bP+5FyJZLwOmlAbqwpJWjek7TauPeBm5JZJjmRyzco3k7ST6HM6
cm0g5czq9gRG5hMGqM0CpOWN6V0jqOvjZ3gp+NVhtFlEWLFqs9BvaxZ8gCQfLJYKGkssZF0i
KWsRlko5YtwyC30oldSHMsU0rrbQ2dWSOstjybRPef3ueeghU/3GzxKZ50b0eyTZz2858z16
nR/o//Fp/fXX0OYdzqtxHn+ENO5ySD45AYLnGspFk8SNP4xE/32lwvr165tdLpfvvvvu823a
tEl44OdWGNXV1c1btmzxbdu2zbd9+/Y+R0NDQ79iQ99vbmpq8u3YscO3c+fOkMPtdocl9vr6
+uYHHnjA19ra6nvwwQcDB6YhXHkgGprx+3v37vXt27fPOJqbm6WSHfHQjN8/cOCA7+GHH/bt
3r1bWm0Q3c343ba2Nt/+/fsjUrs9e/Y0e71e38GDByNWW/Tt5mjexwG93/xVshm2T/CSRZ/g
YqMXqsrIe2ZMHW70y7Bb34TVL8WFij1cr9TOuzoOhXR5uI3+pklzGx77oiV4TfN2ncTncY5d
nHGYjT9v+Zhj+GrZ6XGn8PXI7AzSbVRrPM886cfPIh6YAxS/ZbIRv/eHFx/B18cPjjKuf5PW
aMSvdGY8jnmj/VLe5X5+8ydXnmL5OFxceUrUJzicaZ/w9dMrZ89GVe6tIWWVR1DurSHlkDvM
co/HGs94pkTlt0Nh+b2G0GjGB0jywWKpoLHEQtYlkrIWYamSo9tCH9yS+sBjiepBDpO6H20H
n6irM2ioJLh3g79/YAtHQz55ppFvJQt0soK0pTO5b1rZV7TtPw/5fptAnh4iT2+Y8uSxePvi
238OhW0CD6HRjA+Q5IPFUtX+M5N1iaSsRViq5Oi10AevpD7wWJHY1+49B0Psaxuxrx8I7Gub
wL5YOWH7mh5j+2oj328XyLONyPNomPLksWJpX22ERjM+QJIPFkuVfZnJukRS1iIsVXI8aqEP
RyX1gcdSYV+HiH09JbCvQwL7YuWE7WtGjO2rnXy/SyDPdiLPzjDlyWPF0r7aCY1mfIAkHyyW
Kvsyk3WJpKxFWKrk2GmhD52S+sBjqbCvp4l9nRXY19MC+2LlVEH6y2JpX13k+z0CeXYReXaH
KU8eK5b21UVoNOMDJPlgsVTZl5msSyRlLcJSJcduC33oltQHHkuFfb1C7OsdgX29IrAvVk7Y
vmbF2L56qL9Q6yvPHiLPZC08efJYsbSvHiJbMz5Akg8WS5V9mcm6RFLWIixVcsTfN9MH/ExG
H3gsFfbVS+zLofW1r16BfbFywvY1O8b2lUJkUCiQZwqRZ0GY8uSxYmlfKYRGMz5Akg8WS5V9
mcm6RFLWIixVciyw0IcCSX3gsVTYVzoZXzRGYF/pWl/7YuWE7WtOjO2rkHy/XCDPQiLP4jDl
yWPF0r4KCY1mfIAkHyyWKvsyk3WJpKxFWKrkuNBCH8LFGmKCpcK+xhH7KhbY1ziBfbFywvY1
V2Bf9Jt0PNzzmnj8XH++smhskX6zweEfIxeN7EVYsbLF50n6qOKDx5LRoVjxXO9Ql3YirGjt
xoqGYY7gsmbUbnj9wXajE51nv8nOJblkMZckEXz26Qv8vw7ufeqzf51MijxzjOJF57M/n5th
7CsQic+eHcfb0dHRJx/CIovGfkeRtC9VYL88FrXJJBObTFJok6r4EGGJbDLJot7GjrtmyxOV
4y3oPD1M5xoFacdj8WnHj7dIUjROgP12mUI+yhSOZcC4qxXKmscKR7/4cm6g06XeoU6/RFiy
NmU1lqO/Mm+BoMxj6TEr80Tz+VTlu2vI9z0K9InH4nWEFnWsjsSjzuE5KY2K5CLCikee6xzB
9GuKkmcRloydQWjZ5RguKMccYZ5HOq/oV/3w/RK6+CbBoPb8ErGBGod/nBiuey5FtdCNyKqn
wxL0/wpYhe7cAdPQ+XJk71WB+bWZEJxDNJg5p/O7BjNxUplrKz7M5Kk6D/GQtG5TkIfwWAOd
h3z+tz+a2hN+Fo1cvArlwmNFw/N7e/aZ8oyfRVNWq9IFEZYMz6p0u43Q0K4gDXmsRNbtowrl
wmPFq26r0gURVqKVj94wyscfkTKKLR/bSPmI03yD8YyWiIeSKuA2uBvWQR1CFJV9gyG4nwGd
75wTJ2VgO0nPLgX2wGMlcj7RqVAuPFa85hOqdEGElWj5xD1h5BO/ITyw+UQ7ySc6Cc5WVKOe
ghDo/iapcWL3XSR9ehToN4+VyHbfrVAuPFa82r0qXRBhJZrd7wzD7s+TNGLtvovYPU7zb4fU
D3TUtq40bRMPJffiIU/oIWmXokWv+zxWIucJeGyZKrnwWPGaJ6jSBRHWl9EeTiFyL1SQhjxW
Iut2gUK58FjxqtuqdEGE9WXodiGhoVxBGvJYiazbCxXKhceKV91WpQsirESry20Poy6H171M
4+pymG9cl8Npjuty82EqasNNNf6mIaRBnN+DPSKpx4XrM41mzBwe11fK+DtZ3aDPfquFt66S
CCtWY1XYb5dZ8FEqyYfKdbsw7moLWa+WlDWPFa++ZzP9isT3XBoBzwM13oCuH0b9fHx6riHp
6Q4zPXmsRC1jMS9uC7m4JeXCY8WrntP0a1Kg5zxWopWxR8A/zwmPKXget/O4tKbPspgydjZn
M/cCXce0Flygw2KoN0bA3g8PGGvHDoLQ9UszmbEEGRC6rqkzyrJYdb7hYXyovH14iAy8YdoH
j5XI+YbXQi5eSbnwWPHI80nNXBciyTc8UfCsSrfbGL8fn4ZtJA2PhpmGPFYi6/ZRC7kclZQL
jxWvum2mC5HodlsEPMebDwGXcXgcwX7AO0n1LRN/xPkQZnM2g9udt6LStBbVDOpQeaijqyyu
rMthfIpZcVLetTM+QV732wl/nWHqPo+VyHlCp4VcOiXlwmPFa55gpguR5AntEfAcb+MJsI3j
MQN3AN5fpW+ewI8nmM3ZTLyOJ6Br9lC/H6/fXYSH7jD1m8dKZLvvtpBLt6RceKx4tXszXYjE
7rsi4Dke6wJ4zMD30fE/Ars/L6gLsDbTty6wxLIuMDhO8oQexl/K634P4S+c9V1EWImcJ2Ce
zeSCn8nIhceK1zzBTBciyRN4rC+j7ZuiBf2lfBqmkDQsCDMNeaxE1u0CC7kUSMqFx4pX3TbT
hUh0OyUCnkXlGr+PKHs/nPNo9rXC5Rfev+wl9Dta61ve4WfZXHnH2kyk+4elk3M65zWN+aV9
wmkSZaPqPKOQpG25wDYKteC+wOHYBo+VyHnGQhO5yNqPCCte84xCRTyLsCLNMxwQH/NzcH6A
x2UchL72QJ9lcvkHtR+c/nh+jk7+KtCx1fAmNaG8IzgPlZ2Pmgqh+99lKBrLwZ7j/CqPxM8h
505jZ9Y76zdX1TS6Nuge3eNye/SGan1pzUZ9+hKyAfzyiipEEV5baRVKxBXJQf0AR2vM9nFP
hBDcZ7AVSg0p54LP0MarRGLPwSQI7m/Ihlxy8KHMyBkwcIkxEmgS0Y/Z0HcdHjbMIc/TddwC
HC3xhuqwAEYaNnmOyVk6mfMjsIzYLD7OcfkPHzr7eb7QsCYssaFwESjvQGToIDlRMgR3n0wj
ua+TsTw6Sh5bTTaxmFySkwwl1jOMWOEIYoE4Zx5JrBavhIVXoSk31qVIIl821CM1L0C/Tihb
ZOBXVq1rqq1q1Btd7qZaj5t5NxDS/Rj4XUfgXQNVHNkhEzlJJnKyTOQUmcipMpHT+otMtwTV
UZLRZePSQ8R+u9tTU1flqWmo1ytqGzwmH3KKP5ShiyJncJEzdYvImTKRB8lEHiwTOUsmcrZM
5ByZyLkykYfIRB4qEzlPJvIwmcjDZSKPkImcLxP5BpnII2Ui3ygT+SaZyKPEkZfCMpTBpKYn
g55l10HsYIevStD4TKCful9/YS2qtqw1an3hxP6gJV5/qUzWkprsWnJNqk4tkR4Y448G0qOB
NT9/bpSFWjAXNg789Bewi0kfnClfRyC4AK/Qt1bVNrn0Cf4W5cSoFeGvFb8a735laDlm/7oP
cneR+0ESNI4Ej96I63TqdPH/+9+/O33111MX+UnQBCQ4OBJW6e4tTVWoYa2KhJM75z17/cAH
RAoOAQlJHAm31VRXuxpd9etd+jqXZ5vLVa/Xuarq3RGT8Md/Jq25f9vqDj8JSQISkjkSVjRs
czXq6xvqq2s2GITU1tTVeKKQwnceu/Dv1TPvJiQkC0hI4Ui4c/NmtSR87WujRz98ahUhIUVA
QipHwlLV6shmCdd9qQIS0syMcqkio2RJue5LC5DwRKCPg+0boiSweTtIveGQfiNJ+g2bKpsq
myqbKpsqmyqbKpsqmyqbqn8VqgbrWyG4Bwt1nOBmxFjiASsC/7zoseQZ9U3jzmTDV/zKoYrb
7l5Xp291TyHO4zWVAV5oI15j2kiUxzcXzWv1++beNr7+Zms4vunp+vIKt4lvWrN900LftBbw
TX+AhJMUlm/6A9KE7Oubpr1EQb/03H765+b18UuH+4Z6v7TfXo4YPVq098b2Gds+Y85nPMb2
Gds+Y9tnbPuM7WAHO9g+Y9tnLPIZi1ucovSxbqPywSH9RpL0GzZVNlU2VTZVNlU2VTZVNlU2
VTZV/ypUBf0+SRH6fabzfp/prN/n3p+8XTxrz9KFIr/PvEVvEr/PPfCfuwBu2hXK/7MaO6sO
YubRwZ+sZa7pzGga7r8R0TYEQL995VIcG9PdmwQBfwgNrUiMc9HNWWRVtZDeqRPJcPZnjsAs
71ziQ6B+hRyG/0zums7+zIfQ2a3DIDjbNgNCZ4+OJvF52bKzy9mZu3h26wYLGdD3C+Ayy3G5
+Fwc2O9RObD8qFyBnOoO3T1aNOsZ8zgP+p8BL8Kis7epiPgVyDVQs7r3SfIBKz5kZm/zWKLZ
2ziaaMY6m1bsjORV6NhMZk6/z9nsCyS7SnJohSvhG6CjowrqwW2cuaARaqCaYI4X9Ny8tmLM
sfFMGrRuuXTuEKOXyX20LIf87997cURutYGTswTdq86BzPybAtcFN2Ggx05ivJ7Mwyfw7+UC
//doegZRvSF5UqCLOb8Ad1HDoMX3H/6iJXjNh94pZY+y8c+cLIJPWoLPu470PoLfzyn0f38z
+QXmOxu2+j1TrI5R2TsEsvdqtuwHSvbsqu/rmPTIZc6/xuTJKUx+ncydo0LF8CdhrMo7KipS
0ctfR+d/B7+LLpuUxrcw1zTkk6MC/CtStEJwN8G98H7g+QQmrhZS6gp7TyENHdni39+a3IcS
dLSg5z7/L5STX9/FJ6GlA+Eihr7TAb+d2+rn73iSHH94JQYPOhYRBTgND5nwl96Hp3KOv3ee
WQDvHp+PjgXw1nNL4e1n5sOFU8ug+9nF8M6x+egog96Ti+FddN77wkq4+qcd8FHXRngbXXef
WAKXfleB4i8H3xsPge+v++DDc+vho5fvhU9f34KwUZxnl8DH5zfBp681wks/dUF55RX4+OUa
uP6X7yHsBfBLbyssqvwYHVfgsz80wYXnbof3znng+rUr8N9vfQGPP/E5vHj6GrzXUQm9v98I
1z65AJcRnR+eWwcXXvwWXP3nG/CP09+Fvz1TAb9+6lVoOfgZ/PnkDjhz5l04/sJVePLYVfjx
kc/h+tUriN/r0PnqNdBwGNs34NujxxYXF88uKy4unU1Oysb646OjqFjTJhaRk2ISX3xfwzhF
pcXF84rISRmJX8SF2RHim8U3w584cWLRvIkTFxaRk1Jr/JvnT5k+a+6C0PvJ2qjC8ZOnzZwz
N4SvDKfTWXDLpKkzZs5iv1viHJKfpefl5U2dNj0Ex5k7Ig+HSZOnhOJnOMfh+7eMnxByP3nk
GHxbLyi8mU2vG0bemJc37Ka8LOcobTTzpw3Nyhs23Dki36mFhMxBg7Oy03NyhziTQx+kamnp
Ts3pzNC44EjCMVO4u3w+hVdWEu2IoQG7SklHoC46jeSDuB4yCqJb9elpgjVH8/uI2boPfZbN
1ZPYulKkqz6lMfdSIThGKIXcyyDnVjzgcmERya9xXJ1pieVYtIfotckKOiFyHkXkPCtKOZ8g
WNPQCzM5OdNn/cnZv9tCE2pjVSFJ64a03ca1x9iRgcqN3XUhg5NvJoSumkNHrg2knFndnsDI
fMIAtVmAtLzpri18XR8/w+vChLOTjwgrVm0W+m3Ngg+Q5IPFUkFjiYWsSyRlLcJSKUeMW2ah
D6WS+lCmmMbVFjq7WlJneSyZ9imv3/yuPKx+R7MrTzzw3Ih+jyT7+S1nvkev8wP9Pz6tv/4a
2mzEeTXO44+Qxl0OyScnQPBcQ7lokrjxh5Hov69UWL9+fbPL5fLdd999vk2bNgkP/NwKo7q6
unnLli2+bdu2+bZv397naGho6Fds6PvNTU1Nvh07dvh27twZcrjd7rDEXl9f3/zAAw/4Wltb
fQ8++GDgwDSEKw9EQzN+f+/evb59+/YZR3Nzs1SyIx6a8fsHDhzwPfzww77du3dLqw2iuxm/
29bW5tu/f39Eardnz55mr9frO3jwYMRqi77dHM37OKD3m79KNsP2CV6y6BNcbPRCVRl5z4yp
w41+mWSmXz6cfik+VOzheqV23tVxKKTLw230N02a2/DYFy3Ba5q36yQ+j3Ps4ozDbPx5y8cc
w1fLTo87ha9HZmeQbqNa43nmST9+FvHAHKD4LZON+L0/vPgIvj5+cJRx/Zu0RiN+pTPjccwb
7ZfyLvfzmz+58hTLx+HiylOiPsHhTPuEr59eOXs2qnJvDQR3B+PLvTWkHApnBz4RFi2/HSbl
t0Nh+b2G0GjGB0jywWKpoLHEQtYlkrIWYamSo9tCH9yS+sBjiepBDpO6H20Hn6irM2ioJLh3
g79/YAtHQz55pkFwZVdeJytIWzoTxKvZpg5A+88DwR3KeHl6iDy9YcqTx+Lti2//ORS2CTyE
RjM+QJIPFktV+89M1iWSshZhqZKj10IfvJL6wGNFYl+79xwMsa9txL5+ILCvbQL7YuWE7Wt6
jO2rDYK7ffHybCPyPBqmPHmsWNpXG6HRjA+Q5IPFUmVfZrIukZS1CEuVHI9a6MNRSX3gsVTY
1yFiX08J7OuQwL5YOWH7mhFj+2qH4K5avDzbiTw7w5QnjxVL+2onNJrxAZJ8sFiq7MtM1iWS
shZhqZJjp4U+dErqA4+lwr6eJvZ1VmBfTwvsi5VTBekvi6V9dUFwhypenl1Ent1hypPHiqV9
dREazfgAST5YLFX2ZSbrEklZi7BUybHbQh+6JfWBx1JhX68Q+3pHYF+vCOyLlRO2r1kxtq8e
CO6Sxcuzh8gznN3SRFixtK8eIlszPkCSDxZLlX2ZybpEUtYiLFVyxN830wf8TEYfeCwV9tVL
7Muh9bWvXoF9sXLC9jU7xvaVogV3lOLlmULkWRCmPHmsWNpXCqHRjA+Q5IPFUmVfZrIukZS1
CEuVHAss9KFAUh94LBX2lU7GF40R2Fe61te+WDlh+5oTY/sqJN8X7fRVSORZHKY8eaxY2lch
odGMD5Dkg8VSZV9msi6RlLUIS5UcF1roQ7hYQ0ywVNjXOGJfxQL7GiewL1ZO2L7mCuyLfpOO
h3teE4+f689XFo0t0m82OPxj5KKRvQgrVrb4PEkfVXzwWDI6FCue6x3q0k6EFa3dWNEwzBGc
2UfthtcfbDc60Xn2m+xckksWc0kSwWefvsD/6+Depz7718mkyDPHKF50PvvzuRmDjfZrBD57
dhxvR0eH0p1gnydjrXHalyqwXx6L38WUt8kkhTapig8RlswupqkQOu6aLU9Ujreg8/QwnWsU
pB2PxacdP94iSdE4AfbbZQr5KFM4lgHjrlYoax4rmp2BBypd6h3q9EuEJWtTVmM5+ivzFgjK
PJYeszJPNJ9PVb67hnzfo0CfeKyB3oF7oHQOz0lpVCQXEVY88lznCKZfU5Q8i7Bkd+D+snfd
/lU/fL+ELr5JMKg9v0RsoMbhHyeG655LUS10I7Lq6bAE/b8CVqE7d6ArHZYje3cH5tdmQnAO
0WDmnM7vGszEobt0Z0BkO3KrzkM8JK3bFOQhPNZA5yEDtaM95sWrUC48VjQ8v7dnnynP+Fk0
ZbUqXRBhyfCsSrfbCA3tCtKQx0pk3T6qUC48VrzqtipdEGElWvnoDaN8/BEps9jysY2UjzjN
NxjPaIl4KKkCboO7YR3UIURR2TcYgvsZ0PnOOXFSBraT9OxSYA88ViLnE50K5cJjxWs+oUoX
RFiJlk/cE0Y+8RvCA5tPtJN8opPgbEV15SkIge5vkhondt9F0qdHgX7zWIls990K5cJjxavd
q9IFEVai2f3OMOz+PEkj1u67iN3jNP92SP1AR23rStM28VByLx7yhB6Sdila9LrPYyVynoDH
lqmSC48Vr3mCKl0QYX0Z7eEUIvdCBWnIYyWybhcolAuPFa+6rUoXRFhfhm4XEhrKFaQhj5XI
ur1QoVx4rHjVbVW6IMJKtLrc9jDqcnjdyzSuLof5xnU5nOa4LjcfpqI23FTjbxpCGsT5Pdgj
knpcuD7TaMbM4XF9pYy/k9UN+uy3WnjrKomwYjVWhf12mQUfpZJ8qFy3C+OutpD1aklZ81jx
6ns2069IfM+lEfA8UOMN6Pph1M/Hp+cakp7uMNOTx0rUMhbz4raQi1tSLjxWvOo5Tb8mBXrO
YyVaGXsE/POc8JiC53E7j0tr+iyLKWNnczZzL9B1TGvBBToshnpjBOz98ICxduwgCF2/NJMb
S8Cua+qMsixWnW94GB8qbx8eIgNvmPbBYyVyvuG1kItXUi48VjzyfFIz14VI8g1PFDyr0u02
xu/Hp2EbScOjYaYhj5XIun3UQi5HJeXCY8WrbpvpQiS63RYBz/HmQ8BlHB5HsB/wTlJ9y8Qf
cT6E2ZzN4Hbnrag0rUU1gzpUHuroKosr63IYn2JWnJR37YxPkNf9dsJfZ5i6z2Mlcp7QaSGX
Tkm58FjxmieY6UIkeUJ7BDzH23gCbON4zMAdgPdX6Zsn8OMJZnM2E6/jCeiaPdTvx+t3F+Gh
O0z95rES2e67LeTSLSkXHite7d5MFyKx+64IeI7HugAeM/B9dPyPwO7PC+oCrM30rQsssawL
DI6TPKGH8Zfyut9D+AtnfRcRViLnCZhnM7ngZzJy4bHiNU8w04VI8gQe68to+6ZoQX8pn4Yp
JA0LwkxDHiuRdbvAQi4FknLhseJVt810IRLdTomAZ1G5xu8jyt4P5zyafa1w+YX3L3sJ/Y7W
+pZ3+Fk2V96xNhPp/mHp5JzOeU1jfmmfcJpE2ag6zygkaVsusI1CLbgvcDi2wWMlcp6x0EQu
svYjworXPKNQEc8irEjzDAfEx/wcnB/gcRkHoa890GeZXP5B7QenP56fo5O/CnRsNbxJTSjv
CM5DZeejpkLo/ncZisZysOc4v8oj8XPIudPYmfXO+s1VNY2uDbpH97jcHr2hWl9as1GfvoRs
AL+8wo0owmsrrUKJuCI5qB/gaI3ZPu6JEIL7DLZCqSHlXPAZmn+VSOw5mATB/Q3ZkEsOPpQZ
OYNGcpf5xvtYP+ZC33V42DCPPE/XcQtwtMQbqsMCGGnY5MtMznKeOT8Cy4jN4uNlLv/hw/l+
ni80rAlLLA8uAuUdiAwdJCdKhuDuk2kk93UylkdHyWOrySYWk0tykqHEeoYRKxxBLBDnzCOJ
1eKVsPAqNOXGuhRJ5MuGeqTmBejXCWWLDPzKqnVNtVWNeqPL3VTrcTPvBkK6HwO/6wi8a6CK
IztkIifJRE6WiZwiEzlVJnJaf5HplqA6SjKcyGNIYgfFfrvbU1NX5alpqNcrahs8Jh9yij+U
oYsiZ3CRM3WLyJkykQfJRB4sEzlLJnK2TOQcmci5MpGHyEQeKhM5TybyMJnIw2Uij5CJnC8T
+QaZyCNlIt8oE/kmmcijxJGXwjKUwaSmJ4OeZddB7GCHr0rQ+Eygn7pff2EtqrasNWp94cT+
oCVef6lM1pKa7FpyTapOLZEeGOOPBtKjgTU/f26UhVowFzYO/PQXsItJH/x7HYHgArxC31pV
2+TSJ/hblBOjVoR7f/J28aw9Sxdi9q/7IHcXuR8kQeNI8OiNuE6nThd/OmZX4f9duX6RnwRN
QIKDI2GV7t7SVIUa1qpIePOnef/H/7r+QbmfBIeAhCSOhNtqqqtdja769S59ncuzzeWq1+tc
VfXuiEn464m7x095+K4OPwlJAhKSORJWNGxzNerrG+qrazYYhNTW1NV4opDC6qen1sMXlIRk
AQkpHAl3bt6sloR1v/ve3791IyUhRUBCKkfCUtXqyGYJ132pAhLSzIxyqSKjZEm57ksLkPBE
oI+D7RuiJLB5O0i94ZB+I0n6DZsqmyqbKpsqmyqbKpsqmyqbKpuqfxWqButbITj+gDpOcDNi
LPGAFYF/XvRY8oz6pnFnsuErfuVQxW13r6vTt7qnEOfxmsoAL7QRrzFtJMrjm4vmtToMet82
uHizNRzf9EwL37Rm+6aFvmkt4Jv+AAknOSzf9AekCdnXN017iYJ+6dJ++ufK+vilw31DvV/a
by9HjB4t6n+2fca2z5jzGeu2z9j2Gds+Y9tnbAc72MH2Gds+Y5HPWNziFKWPdRuVDw7pN5Kk
37CpsqmyqbKpsqmyqbKpsqmyqbKp+lehKuj3SWY6P9Ml/D4zeb/PTNbv8/N3f3r/pb/9Uej3
mbfoTeL3uQf+cxfATbtC+X9WY2fVQcw8OviTtcw1nRlNw/03ItqGAOi3r1yKY2O6e5Mg4A+h
oTUNYC66OYusqhbSO3UiGc7+zBGY5Z1LfAjUr5DD8J/JXdPZn/kQOrt1GARn22ZA6OzR0SQ+
L1t2djk7cxfPbt1gIQP6fgFcZjkuF5+LA/s9KgeWH5UrkFPdobtHi2Y9Yx7nQf8z4EVYdPY2
FRG/ArkGalb3Pkk+YMWHzOxtHks0extHE81YZ9OKnZG8Ch2byczp9zmbfYFkV0kOrXAlfAN0
dFRBPbiNMxc0Qg1UE8zxgp6b11aMOTaeSYOOb146d4jRy+Q+WpZD/vfvvTgit9rAyVmC7lXn
wMf5YwPXBXhqNzx2EuP1ZB4+gX8vF/i/R9MziOoNyZPow4/zC3BGCYMW33/4i5bgNR96p5Q9
ysY/c7IIPmkJPu860vsIfj+n0P/9zeQXmO9s2Or3TLE6RmXvEMjeq9myHyjZs6u+r2PSI5c5
/xqTJ6cw+XUyd44KFcOfhLEq76ioSEUvfx2d/x38LrpsUhrfwlzTkE+OCvDPGW+F4G6Ce+H9
wPMJTFwtpNQV9p5Cms/3ULb/dwX6/S/0C+Q6h/wC/1uCjhYU1+f/hXL/70LfxScXtnSgS8TQ
dzrgv+a2+vk7niTHH1YZDzoWEQU4DQ+Z8Jfeh6dyjr93nlkA7x6fj44F8NZzS+HtZ+bDhVPL
oPvZxfDOsfnoKIPek4vhXXTe+8JKuPqnHfBR10Z4G113n1gCl35XgeIvB98bD4Hvr/vgw3Pr
4aOX74VPX9+CsFGcZ5fAx+c3waevNcJLP3VBeeUV+PjlGrj+l+8h7AXwS28rLKr8GB1X4LM/
NMGF526H98554Pq1K/Dfb30Bjz/xObx4+hq811EJvb/fCNc+uQCXEZ0fnlsHF178Flz95xvw
j9Pfhb89UwG/fupVaDn4Gfz55A44c+ZdOP7CVXjy2FX48ZHP4frVK4jf69D56jXQcBjbN+Db
o8cWFxfPLisuLp1NTsrG+uOjo6hY0yYWkZNiEl98X8M4RaXFxfOKyEkZiV/EhdkR4pvFN8Of
OHFi0byJExcWkZNSa/yb50+ZPmvugtD7ydqowvGTp82cMzeErwyn01lwy6SpM2bOYr9b4hyS
n6Xn5eVNnTY9BMeZOyIPh0mTp4TiZzjH4fu3jJ8Qcj955Bh8Wy8ovJlNrxtG3piXN+ymvCzn
KG0086cNzcobNtw5It+phYTMQYOzstNzcoc4k0MfpGpp6U7N6czQuOBIwjFTuLt8PoVXVhLt
iKEBu0pJR6AuOo3kg7geMgqiW/XpaYI1R/P7iNm6D32WzdWT2LpSpKs+pTH3UiE4RiiF3Msg
51Y84HJhEcmvcVydaYnlWLSH6LXJCjohch5F5DwrSjmfIFjT0AszOTnTZ/3J2b/bQhNqY1Uh
SeuGtN3GtcfYkYHKjd11IYOTbyaErppDR64NpJxZ3Z7AyHzCALVZgLS86a4tfF0fPyuB8Hby
EWHFqs1Cv61Z8AGSfLBYKmgssZB1iaSsRVgq5Yhxyyz0oVRSH8oU07jaQmdXS+osjyXTPuX1
m9+Vh9XvaHbliQeeG9HvkWQ/v+XM9+h1fqD/x6f1119Dm404r8Z5/BHSuMsh+eQECJ5rKBdN
Ejf+MBL995UK69evb3a5XL777rvPt2nTJuGBn1thVFdXN2/ZssW3bds23/bt2/scDQ0N/YoN
fb+5qanJt2PHDt/OnTtDDrfbHZbY6+vrmx944AFfa2ur78EHHwwcmIZw5YFoaMbv792717dv
3z7jaG5ulkp2xEMzfv/AgQO+hx9+2Ld7925ptUF0N+N329rafPv3749I7fbs2dPs9Xp9Bw8e
jFht0bebo3kfB/R+81fJZtg+wUsWfYKLjV6oKiPvmTF1uNEvk8z0y4fTL8WHij1cr9TOuzoO
hXR5uI3+pklzGx77oiV4TfN2ncTncY5dnHGYjT9v+Zhj+GrZ6XGn8PXI7AzSbVRrPM886cfP
Ih6YAxS/ZbIRv/eHFx/B18cPjjKuf5PWaMSvdGY8jnmj/VLe5X5+8ydXnmL5OFxceUrUJzic
aZ/w9dMrZ89GVe6tgeDuYHy5t4aUQ+HswCfCouW3w6T8digsv9cQGs34AEk+WCwVNJZYyLpE
UtYiLFVydFvog1tSH3gsUT3IYVL3o+3gE3V1Bg2VBPdu8PcPbOFoyCfPNAiu7MrrZAVpS2eC
eDXb1AFo/3kguEMZL08Pkac3THnyWLx98e0/h8I2gYfQaMYHSPLBYqlq/5nJukRS1iIsVXL0
WuiDV1IfeKxI7Gv3noMh9rWN2NcPBPa1TWBfrJywfU2PsX21QXC3L16ebUSeR8OUJ48VS/tq
IzSa8QGSfLBYquzLTNYlkrIWYamS41ELfTgqqQ88lgr7OkTs6ymBfR0S2BcrJ2xfM2JsX+0Q
3FWLl2c7kWdnmPLksWJpX+2ERjM+QJIPFkuVfZnJukRS1iIsVXLstNCHTkl94LFU2NfTxL7O
CuzraYF9sXKqIP1lsbSvLgjuUMXLs4vIsztMefJYsbSvLkKjGR8gyQeLpcq+zGRdIilrEZYq
OXZb6EO3pD7wWCrs6xViX+8I7OsVgX2xcsL2NSvG9tUDwV2yeHn2EHmGs1uaCCuW9tVDZGvG
B0jywWKpsi8zWZdIylqEpUqO+Ptm+oCfyegDj6XCvnqJfTm0vvbVK7AvVk7YvmbH2L5StOCO
Urw8U4g8C8KUJ48VS/tKITSa8QGSfLBYquzLTNYlkrIWYamSY4GFPhRI6gOPpcK+0sn4ojEC
+0rX+toXKydsX3NibF+F5Puinb4KiTyLw5QnjxVL+yokNJrxAZJ8sFiq7MtM1iWSshZhqZLj
Qgt9CBdriAmWCvsaR+yrWGBf4wT2xcoJ29dcgX3Rb9LxcM9r4vFz/fnKorFF+s0Gh3+MXDSy
F2HFyhafJ+mjig8eS0aHYsVzvUNd2omworUbKxqGOYLLmlG74fUH241OdJ79JjuX5JLFXJJE
8NmnL/D/Orj3qc/+dTIp8swxihedz/58bsZgo/0agc+eHcfb0dGhdCfY58lYa5z2pQrsl8fi
dzHlbTJJoU2q4kOEJbOLaSqEjrtmyxOV4y3oPD1M5xoFacdj8WnHj7dIUjROgP12mUI+yhSO
ZcC4qxXKmseKZmfggUqXeoc6/RJhydqU1ViO/sq8BYIyj6XHrMwTzedTle+uId/3KNAnHmug
d+AeKJ3Dc1IaFclFhBWPPNc5gunXFCXPIizZHbi/7F23f9UP3y+hi28SDGrPLxEbqHH4x4nh
uudSVAvdiKx6OixB/6+AVejOHTATnS9H9u4OzK/NhOAcosHMOZ3fNZiJQ3fpzoDIduRWnYd4
SFq3KchDeKyBzkMGakd7zItXoVx4rGh4fm/PPlOe8bNoympVuiDCkuFZlW63ERraFaQhj5XI
un1UoVx4rHjVbVW6IMJKtPLRG0b5+CNSZrHlYxspH3GabzCe0RLxUFIF3AZ3wzqoQ4iism8w
BPczoPOdc+KkDGwn6dmlwB54rETOJzoVyoXHitd8QpUuiLASLZ+4J4x84jeEBzafaCf5RCfB
2YrqylMQAt3fJDVO7L6LpE+PAv3msRLZ7rsVyoXHile7V6ULIqxEs/udYdj9eZJGrN13EbvH
af7tkPqBjtrWlaZt4qHkXjzkCT0k7VK06HWfx0rkPAGPLVMlFx4rXvMEVbogwvoy2sMpRO6F
CtKQx0pk3S5QKBceK151W5UuiLC+DN0uJDSUK0hDHiuRdXuhQrnwWPGq26p0QYSVaHW57WHU
5fC6l2lcXQ7zjetyOM1xXW4+TEVtuKnG3zSENIjze7BHJPW4cH2m0YyZw+P6Shl/J6sb9Nlv
tfDWVRJhxWqsCvvtMgs+SiX5ULluF8ZdbSHr1ZKy5rHi1fdspl+R+J5LI+B5oMYb0PXDqJ+P
T881JD3dYaYnj5WoZSzmxW0hF7ekXHiseNVzmn5NCvScx0q0MvYI+Oc54TEFz+N2HpfW9FkW
U8bO5mzmXqDrmNaCC3RYDPXGCNj74QFj7dhBELp+aSY3loBd19QZZVmsOt/wMD5U3j48RAbe
MO2Dx0rkfMNrIRevpFx4rHjk+aRmrguR5BueKHhWpdttjN+PT8M2koZHw0xDHiuRdfuohVyO
SsqFx4pX3TbThUh0uy0CnuPNh4DLODyOYD/gnaT6lok/4nwIszmbwe3OW1FpWotqBnWoPNTR
VRZX1uUwPsWsOCnv2hmfIK/77YS/zjB1n8dK5Dyh00IunZJy4bHiNU8w04VI8oT2CHiOt/EE
2MbxmIE7AO+v0jdP4McTzOZsJl7HE9A1e6jfj9fvLsJDd5j6zWMlst13W8ilW1IuPFa82r2Z
LkRi910R8ByPdQE8ZuD76Pgfgd2fF9QFWJvpWxdYYlkXGBwneUIP4y/ldb+H8BfO+i4irETO
EzDPZnLBz2TkwmPFa55gpguR5Ak81pfR9k3Rgv5SPg1TSBoWhJmGPFYi63aBhVwKJOXCY8Wr
bpvpQiS6nRIBz6Jyjd9HlL0fznk0+1rh8gvvX/YS+h2t9S3v8LNsrrxjbSbS/cPSyTmd85rG
/NI+4TSJslF1nlFI0rZcYBuFWnBf4HBsg8dK5DxjoYlcZO1HhBWveUahIp5FWJHmGQ6Ij/k5
OD/A4zIOQl97oM8yufyD2g9Ofzw/Ryd/FejYaniTmlDeEZyHys5HTYXQ/e8yFI3lYM9xfpVH
4ueQc6exM+ud9ZurahpdG3SP7nG5PXpDtb60ZqM+fQnZAH55hRtRhNdWWoUScUVyUD/A0Rqz
fdwTIQT3GWyFUkPKueAzUvQqkdhzMAmC+xuyIZccfCgzcgYMPM0YCTSJ6Ecp9F2Hhw1l5Hm6
jluAoyXeUB0WwEjDJl9lcpbXmPMjsIzYLD5e5fKfPmsN9fN8oWFNWGLD4CJQ3oHI0EFyomQI
7j6ZRnJfJ2N5dJQ8tppsYjG5JCcZSqxnGLHCEcQCcc48klgtXgkLr0JTbqxLkUS+bKhHal6A
fp1QtsjAr6xa11Rb1ag3utxNtR43824gpPsx8LuOwLsGqjiyQyZykkzkZJnIKTKRU2Uip/UX
mW4JqqMkSwf/MiHpIWK/3e2pqavy1DTU6xW1DR6TDznFH8rQRZEzuMiZukXkTJnIg2QiD5aJ
nCUTOVsmco5M5FyZyENkIg+ViZwnE3mYTOThMpFHyETOl4l8g0zkkTKRb5SJfJNM5FHiyEth
GcpgUtOTQc+y6yB2sMNXJWh8JtBP3a+/sBZVW9Yatb5wYn/QEq+/VCZrSU12LbkmVaeWSA+M
8UcD6dHAmp8/N8pCLZgLGwd++gvYxaQPvnMdgeACvELfWlXb5NIn+FuUE6NWhJ+/+9P7L/3t
jwsx+9d9kLuL3A+SoHEkePRGXKdTp4ufzfjx2rEHFi3yk6AJSHBwJKzS3VuaqlDDWhUJ/zjy
yZ2T3/qg3E+CQ0BCEkfCbTXV1a5GV/16l77O5dnmctXrda6qenfEJIya94cb8jeu6fCTkCQg
IZkjYUXDNlejvr6hvrpmg0FIbU1djScKKWT9P/ue+X+/801CQrKAhBSOhDs3b1ZLwqRf3/Tg
tzffSUhIEZCQypGwVLU6slnCdV+qgIQ0M6NcqsgoWVKu+9ICJDwR6ONg+4YoCWzeDlJvOKTf
SJJ+w6bKpsqmyqbKpsqmyqbKpsqmyqbqX4WqwfpW4slKZhwnuLU/lnjAiogXcSx5Rn3TuDPZ
8BW/cqjitrvX1elb3VOI83hNZYAX2ojXmDYS5fHNRfNaHUbT7W2DizdbnTDBwjd9qwE/XV95
Z6WFf1qz/dNC/7QW8E9/gISTEpZ/+gPSjOzrn6Y9RUHf9Px++ugW9PFNh/uGet+032aOGHpO
fdC239j2G3N+4wLbb2z7jW2/se03toMd7GD7jW2/schvLG51itLHup3KB4f0G0nSb9hU2VTZ
VNlU2VTZVNlU2VTZVNlU/atQNVh3k97oFKbzs4Dx/eC5qXMEvp/hxPcznff9TA+Q1Dju3uJ1
j3+xQOT4mbfoTeL4uQd+tQvB7wpl/lmNnVYHMXPn4E/WMtd0ajQN99+IaBsCoN++cimOjenu
TYKAM4SG1jSAuejmLLKsWkjX1IlkOPszR6BvOZc4EKhTIYfhP5O7ptM/8yF0euswCE63zYDQ
6aOjSXxetuz0cnbqLp7eusFCBvT9ArjMclwuPhcH9ntUDiw/Kpcgp7pDt48WTXvGPM6D/qfA
i7Do9G0qIn4Jcg3ULO99knzAig+Z6ds8lmj6No4mmrLOphU7JXkVOjaTqdPvczb7AskYkhxa
4Ur4BujoqIJ6cBtnLmiEGqgmmOMF3TavrRhzbDybF9xz6dwhRi+T+2hZDvnfv/niiNxqAydn
CbpXje7m/DZwXYAVAB47ifF6Mg+fwL+XC/zfo+kZRPWG5En0oTenwAActPj+w1+0BK95qnqn
lD3Kxj9zsgg+aQk+7zrS+wh+P6fQ//3N5BeY72zY6ndLsTpGZe8QyN6r2bIfKNmzy76vY9Ij
lzn/GpMnpzD5dTJ3jgoVw5mEsSrvqKhIRS9/HZ3/Hfz+uWxSFN/CXNOQT44K8C9J0QrB7QT3
wvuB5xOYuFpIqSvsOoU0n++hbP/vCvT7X+gXyHUO+QX+twQdLSiuz/8L5f7fhb6LTy5s6UCX
iKHvdMB/zW3183c8SY4/vBSDBx2LiAKchodM+Evvw1M5x987zyyAd4/PR8cCeOu5pfD2M/Ph
wqll0P3sYnjn2Hx0lEHvycXwLjrvfWElXP3TDvioayO8ja67TyyBS7+rQPGXg++Nh8D3133w
4bn18NHL98Knr29B2CjOs0vg4/Ob4NPXGuGln7qgvPIKfPxyDVz/y/cQ9gL4pbcVFlV+jI4r
8NkfmuDCc7fDe+c8cP3aFfjvt76Ax5/4HF48fQ3e66iE3t9vhGufXIDLiM4Pz62DCy9+C67+
8w34x+nvwt+eqYBfP/UqtBz8DP58cgecOfMuHH/hKjx57Cr8+MjncP3qFcTvdeh89RpoOIzt
G/Dt0WOLi4tnlxUXl84mJ2Vj/fHRUVSsaROLyEkxiS++r2GcotLi4nlF5KSMxC/iwuwI8c3i
m+FPnDixaN7EiQuLyEmpNf7N86dMnzV3Qej9ZG1U4fjJ02bOmRvCV4bT6Sy4ZdLUGTNnsd8t
cQ7Jz9Lz8vKmTpseguPMHZGHw6TJU0LxM5zj8P1bxk8IuZ88cgy+rRcU3sym1w0jb8zLG3ZT
XpZzlDaa+dOGZuUNG+4cke/UQkLmoMFZ2ek5uUOcyaEPUrW0dKfmdGZoXHAk4Zgp3F0+n8JL
K4m2xNCAXaakI1AXnUbyQVwPGQXRLfv0NMGao/kdxGzdhz7L5upJbF0p0mWf0ph7qRAcIJRC
7mWQcysecLmwiOTXOK7ONMNyLNpD9NpkCZ0QOY8icp4VpZxPEKxp6IWZnJzps/7k7N9uoQm1
saqQpHVD2m7j2mNsyUDlxm67kMHJNxNCl82hw9YGUs6sbk9gZD5hgNosOJRCcNsWvq6Pn5VA
eFv5iLBi1Wah39Ys+ABJPlgsFTSWWMi6RFLWIiyVcsS4ZRb6UCqpD2WKaVxtobOrJXWWx5Jp
n/L6zW/Lw+p3NNvyxAPPjej3SLKf33Lme/Q6P9D/49P666+hTSacV+M8/ghp3OWQfHICBM81
lIsmiRt/GIn++0qF9evXN7tcLt99993n27Rpk/DAz60wqqurm7ds2eLbtm2bb/v27X2OhoaG
fsWGvt/c1NTk27Fjh2/nzp0hh9vtDkvs9fX1zQ888ICvtbXV9+CDDwYOTEO48kA0NOP39+7d
69u3b59xNDc3SyU74qEZv3/gwAHfww8/7Nu9e7e02iC6m/G7bW1tvv3790ekdnv27Gn2er2+
gwcPRqy26NvN0byPA3q/+atkM2yf4CWLPsHFRi9UlZH3zJg63OiXSWb65cPql+JCxR6uV2rn
XR2HQro83EZ/06S5DY990RK8pnm7TuLzOMcuzjjMxp+3fMwxfLXs9LhT+HpkdgbpNqo1nmee
9ONnEffLAYrfMtmI3/vDi4/g6+MHRxnXv0lrNOJXOjMex7zRfinvcj+/+ZMrT7F8HC6uPCXq
ExzOtE/4+umVs2ejKvfWQHB7ML7cW0PKoXC24BNh0fLbYVJ+OxSW32sIjWZ8gCQfLJYKGkss
ZF0iKWsRlio5ui30wS2pDzyWqB7kMKn70Xbwibo6g4ZKgns3+PsHtnA05JNnGgSXduV1soK0
pTNBvJxt6gC0/zwQ3KKMl6eHyNMbpjx5LN6++PafQ2GbwENoNOMDJPlgsVS1/8xkXSIpaxGW
Kjl6LfTBK6kPPFYk9rV7z8EQ+9pG7OsHAvvaJrAvVk7YvqbH2L7aILjdFy/PNiLPo2HKk8eK
pX21ERrN+ABJPlgsVfZlJusSSVmLsFTJ8aiFPhyV1AceS4V9HSL29ZTAvg4J7IuVE7avGTG2
r3YIbqvFy7OdyLMzTHnyWLG0r3ZCoxkfIMkHi6XKvsxkXSIpaxGWKjl2WuhDp6Q+8Fgq7Otp
Yl9nBfb1tMC+WDlVkP6yWNpXFwS3qOLl2UXk2R2mPHmsWNpXF6HRjA+Q5IPFUmVfZrIukZS1
CEuVHLst9KFbUh94LBX29Qqxr3cE9vWKwL5YOWH7mhVj++qB4DZZvDx7iDzD2S5NhBVL++oh
sjXjAyT5YLFU2ZeZrEskZS3CUiVH/H0zfcDPZPSBx1JhX73EvhxaX/vqFdgXKydsX7NjbF8p
WnBLKV6eKUSeBWHKk8eKpX2lEBrN+ABJPlgsVfZlJusSSVmLsFTJscBCHwok9YHHUmFf6WR8
0RiBfaVrfe2LlRO2rzkxtq9C8n3RVl+FRJ7FYcqTx4qlfRUSGs34AEk+WCxV9mUm6xJJWYuw
VMlxoYU+hIs1xARLhX2NI/ZVLLCvcQL7YuWE7WuuwL7oN+l4uOc18fi5/nxl0dgi/eZ/OPxj
5KKRvQgrVrb4PEkfVXzwWDI6FCueH3OoSzsRVrR2Y0VDsSO4phm1G15/sN3oROfZb7JzSS5Z
zCVJBJ99+gL/r4N7n/rsXyczIs8co3jR+ezP52YMNtqvEfjs2XG8HR0dSreCfZ6MtcZpX6rA
fnksfhtT3iaTFNqkKj5EWDLbmKZC6LhrtjxROd6CztPDdK5RkHY8Fp92/HiLJEXjBNhvlynk
o0zhWAaMu1qhrHmsaLYGHqh0ecyhTr9EWLI2ZTWWo78yb4GgzGPpMSvzRPP5VOW7a8j3PQr0
icca6C24B0rn8JyURkVyEWHFI8+POoLp1xQlzyIs2S24v+xtt3/fD98voYtvgn+uGbXnl4gN
/NjhHyeG03spqoVuRFY9HW5F/6+AVejOHehKh5VwJ/qSDsuR3bsD82wzITiXKIs7p4s50zi5
5JrmTXT77gyIbKtu1XmLh+hAm4K8hcca6LxloLa6x7x4FcqFx4qG5/f27DPlGT+LpgxXpQsi
LBmeVel2G6GhXUEa8liJrNtHFcqFx4pX3ValCyKsRCs3vWGUmz8iZRhbbraRchOn+QbjGS0p
DyVVwG1wN6yDOoQoKgsHQ3CTAzoPOidOysB2kp5dCuyBx0rkfKJToVx4rHjNJ1Tpgggr0fKJ
e8LIJ35DeGDziXaST3QSnK2o7jwFIdBNT1LjxO67SPr0KNBvHiuR7b5boVx4rHi1e1W6IMJK
NLuvDcPuz4N/LQzW7ruI3eM0vyukfiCuE8RDHtBD0ipFi17XeaxEzgPwGDNVcuGx4jUPUKUL
Iqwvo/2bQuReqCANeaxE1u0ChXLhseJVt1Xpggjry9DtQkJDuYI05LESWbcXKpQLjxWvuq1K
F0RYiVZ32x5G3Q2vf5nG1d0w37juhtP824A315yK2mxTjb9pCGkQ5/dgj0jqceH6TqMZO4fH
95Uyfk9WN+iz32rhra8kworVmBX222UWfJRK8qFy/S6Mu9pC1qslZc1jxasP2ky/IvFBl0bA
80CNO6DriFG/Hp+ea0h6usNMTx4rUctYzIvbQi5uSbnwWPGq5zT9mhToOY+VaGXsEfDPd8Jj
C55HRwOX1vRZFlPGzuZs5l6g65nWggt0WAz1xkjY++EBYw3ZQRC6jmkmN3aAXd/UGWVZrDrf
8DA+U94+PEQG3jDtg8dK5HzDayEXr6RceKx45PmkZq4LkeQbnih4VqXbbYyfj0/DNpKGR8NM
Qx4rkXX7qIVcjkrKhceKV90204VIdLstAp7jqUzcSco4PG5gP+DtpPqWiT8iacSWiazN4Hbn
rag0rUU1gzpUHuroKosr63IYH2JWnJR37YwPkNf9dsJfZ5i6z2Mlcp7QaSGXTkm58FjxmieY
6UIkeUJ7BDzH2/gBbON4jMAdgPdZ6Zsn8OMHZnM2E6/jB+jaPdTvx+t3F+GhO0z95rES2e67
LeTSLSkXHite7d5MFyKx+64IeI7HugAeI/B9dPyPwO7PC+oCrM30rQsssawLDI6TPKGH8Zfy
ut9D+AtnnRcRViLnCZhnM7ngZzJy4bHiNU8w04VI8gQe68to+6ZoQX8pn4YpJA0LwkxDHiuR
dbvAQi4FknLhseJVt810IRLdTomAZ1G5xu8nyt4P5zya/a1w+YX3MXsJ/Y7W+pZ3+Fk2V96x
NhPpPmLp5JzOL0tjfmmfcJpE2ag6zygkaVsusI1CLbg/cDi2wWMlcp6x0EQusvYjworXPKNQ
Ec8irEjzDAfEx3wcnB/gcRkHoa890GeZXP5B7QenP56Po5O/CnRsNbxJTSjvCM47ZeefpkLo
PngZisZysOc4v8oj8XPIudPYBerO+s1VNY2uDbpH97jcHr2hWl9as1Gffqt/F3h95Z2V+vIK
N6IKr7O0CiXkiuSgjoCjNWZ7uidCCO452AqlhqRzwWeUDleJxJ6DSRDc65ANueTgQ5mRO1Dt
nW+8n2Gc9V2Thw0LyPN0HbcCR0u8oTosgJGGXa5lcpd7mPMjsIzYLT7WcnkQH+7p5/lCw6Kw
xIbDRaC8A5Ghg+RGyRDciTKN5MBOxvro6HhsOdnEanJJbjKUWNAwYokjiBXi3HkkSSe8KhZe
kabcWKMiiXzZUI/UvAD9OqFskYFfWbWuqbaqUW90uZtqPW7m3UBI92Pgdx2Bdw1UcWSHTOQk
mcjJMpFTZCKnykRO6y8y3R5UR0mWzlSrgmK/3e2pqavy1DTU6xW1DR6TDznFH8rQRZEzuMiZ
ukXkTJnIg2QiD5aJnCUTOVsmco5M5FyZyENkIg+ViZwnE3mYTOThMpFHyETOl4l8g0zkkTKR
b5SJfJNM5FHiyEthGcpgUtOTQc+y6yB2sMNXJWh8JtBP3a+/sBZVW9Yatb5wYn/QEq+/VCZr
SU2W1plJ1akl0gNj/NFAejSw/ufPjbJQC+bCxoGf/gJ2MemD63jXEQguwCv0rVW1TS59gr9V
OTFqRWgcd2/xuse/WIDZv+6D3F3kfpAEjSPBozfiOp06Xbx13fPaT7Y1LfKToAlIcHAkrNLd
W5qqUONaFQkbhvzhned8H5T7SXAISEjiSLitprra1eiqX+/S17k821yuer3OVVXvjpiE1w+8
d3bTe3d1+ElIEpCQzJGwomGbq1Ff31BfXbPBIKS2pq7GE4UU/m3+sfFawTcJCckCElI4Eu7c
vFktCd/6y/j7/nSSSiFFQEIqR8JS1erIZgnXfakCEtLMjHKpIqNkSbnuSwuQ8ESgj4PtG6Ik
sHk7SL3hkH4jSfoNmyqbKpsqmyqbKpsqmyqbKpsqm6p/FaoG627iyUphHCfYYTKWeMDwGIU5
5Fpj/NO4T9vwF79yqOK2u9fV6VvdU/wO5ABJtAWvMQ0kyuCbi+a1Oox7bxvx32xV4ZzWbOe0
0DmtBZzTHyDhpIblnP6AtCH7OqdpN1HQMb2wnw668j6O6XDfUO+Y9mvnEaNLizqgbaex7TTm
nMaFttPYdhrbTmPbaWwHO9jBdhrbTmOR01jc5BSlj3UjlQ8O6TeSpN+wqbKpsqmyqbKpsqmy
qbKpsqmyqfpXoWqwvpX0RqcynZ+FjOOnCPyL4vKOnxuo40efsHnK7XPmzl48kfH90G+Ufnfs
Z/9+6cGFIt/PvEVvEt/PPfD7XQDzd4Xy/6zGTquDmHl08CfZ7Vfo9Gga7r8R0TYEQL995VIc
G9PdmwQBfwgNrWkAc9HNWWRptZDeqRPJcPZnjsCcpFziQ6B+hRyG/0zumk4BzYfQKa7DIDjl
NgNCp5COJvF52bJTzNnpu3iK6wYLGdD3C+Ayy3G5+Fwc2O9RObD8qFyGnOoO3UpaNPUZ8zgP
+p8GL8KiU7ipiPhlyDVQs8T3SfIBKz5kpnDzWKIp3DRH4Kets2nFTktehY7NZPr0+5zNvkCy
qySHVrgSvgE6OqqgHtzGmQsaoQaqCeZ4Qc/NayvGHBvP5gWuS+cOMXqZ3EfLcsj//g0XR+Re
NHBylqB7F3Pg74P/Frgu+JsGrSkLnsd4PZmHT+DfywX+79H0DKJ6Q/Ik+vDvgwsMwEGL7z/8
RUvwmqeqd0rZo2z8MyeL4JOW4POuI72P4PdzCv3f30x+gfnOhq1+zxSrY1T2DoHsvZot+4GS
Pbv0+zomPXKZ868xeXIKk18nc+eoUDH8SRir8o6KilT08tfxd8HvossmpfEtzDUN+eSoAP+y
FK0Q3EJwL7wfeD6BiauFlLrC3lNIQ0e2z7eZ/OLrHPR7Gf1+Qn4vo98Z6NeHfn34t8TfTTgU
r0KAflvK0aMW/Pjik9DSgXD/DmnfQb9zW/38HU+S4w8vx+BBxyKiAKfhIRP+0vvwVM7x984z
C+Dd4/PRsQDeem4pvP3MfLhwahl0P7sY3jk2Hx1l0HtyMbyLzntfWAlX/7QDPuraCG+j6+4T
S+DS7ypQ/OXge+Mh8P11H3x4bj189PK98OnrWxA2ivPsEvj4/Cb49LVGeOmnLiivvAIfv1wD
1//yPYS9AH7pbYVFlR+j4wp89ocmuPDc7fDeOQ9cv3YF/vutL+DxJz6HF09fg/c6KqH39xvh
2icX4DKi88Nz6+DCi9+Cq/98A/5x+rvwt2cq4NdPvQotBz+DP5/cAWfOvAvHX7gKTx67Cj8+
8jlcv3oF8XsdOl+9BhoOY/sGfHv02OLi4tllxcWls8lJ2Vh/fHQUFWvaxCJyUkzii+9rGKeo
tLh4XhE5KSPxi7gwO0J8s/hm+BMnTiyaN3HiwiJyUmqNf/P8KdNnzV0Qej9ZG1U4fvK0mXPm
hvCV4XQ6C26ZNHXGzFnsd0ucQ/Kz9Ly8vKnTpofgOHNH5OEwafKUUPwM5zh8/5bxE0LuJ48c
g2/rBYU3s+l1w8gb8/KG3ZSX5RyljWb+tKFZecOGO0fkO7WQkDlocFZ2ek7uEGdy6INULS3d
qTmdGRoXHEk4Zgp3l8+n8PJKom0xNGCXKukI1EWnkXwQ10NGQXRLPz1NsOZofh8xW/ehz7K5
ehJbV4p06ac05h6d+EN/B5F6eEo/POByYRHJr3FcnWmJ5Vi0h+i1yTI6IXIeReQ8K0o5nyBY
09ALMzk502f9ydm/5UITamNVIUnrhrTdxrXH2JaByo3deiGDk28mhC6dQ0euDaScWd2ewMh8
wgC1WYC0vOnWLXxdHz8rgfC28xFhxarNQr+tWfABknywWCpoLLGQdYmkrEVYKuWIccss9KFU
Uh/KFNO42kJnV0vqLI8l0z7l9ZvfmofV72i25okHnhvR75FkP7/lzPfodX6g/8en9ddfQ5tM
OK/GefwR0rjLIfnkBAieaygXTRI3/jAS/feVCuvXr292uVy+++67z7dp0ybhgZ9bYVRXVzdv
2bLFt23bNt/27dv7HA0NDf2KDX2/uampybdjxw7fzp07Qw632x2W2Ovr65sfeOABX2trq+/B
Bx8MHJiGcOWBaGjG7+/du9e3b98+42hubpZKdsRDM37/wIEDvocffti3e/duabVBdDfjd9va
2nz79++PSO327NnT7PV6fQcPHoxYbdG3m6N5Hwf0fvNXyWbYPsFLFn2Ci41eqCoj75kxdbjR
L5PM9MuH1S/FhYo9XK/Uzrs6DoV0ebiN/qZJcxse+6IleE3zdp3E53GOXZxxmI0/b/mYY/hq
2elxp/D1yOwM0m1UazzPPOnHzyLekQMUv2WyEb/3hxcfwdfHD44yrn+T1mjEr3RmPI55o/1S
3uV+fvMnV55i+ThcXHlK1Cc4nGmf8PXTK2fPRlXurYHgFmF8ubeGlEPhbMMnwqLlt8Ok/HYo
LL/XEBrN+ABJPlgsFTSWWMi6RFLWIixVcnRb6INbUh94LFE9yGFS96Pt4BN1dQYNlQT3bvD3
D2zhaMgnzzQILu/K62QFaUtngnhJ29QBaP95ILhNGS9PD5GnN0x58li8ffHtP4fCNoGH0GjG
B0jywWKpav+ZybpEUtYiLFVy9Frog1dSH3isSOxr956DIfa1jdjXDwT2tU1gX6ycsH1Nj7F9
tUFwyy9enm1EnkfDlCePFUv7aiM0mvEBknywWKrsy0zWJZKyFmGpkuNRC304KqkPPJYK+zpE
7OspgX0dEtgXKydsXzNibF/tENxai5dnO5FnZ5jy5LFiaV/thEYzPkCSDxZLlX2ZybpEUtYi
LFVy7LTQh05JfeCxVNjX08S+zgrs62mBfbFyqiD9ZbG0ry4IblPFy7OLyLM7THnyWLG0ry5C
oxkfIMkHi6XKvsxkXSIpaxGWKjl2W+hDt6Q+8Fgq7OsVYl/vCOzrFYF9sXLC9jUrxvbVA8Gt
snh59hB5hrNlmggrlvbVQ2RrxgdI8sFiqbIvM1mXSMpahKVKjvj7ZvqAn8noA4+lwr56iX05
tL721SuwL1ZO2L5mx9i+UrTgtlK8PFOIPAvClCePFUv7SiE0mvEBknywWKrsy0zWJZKyFmGp
kmOBhT4USOoDj6XCvtLJ+KIxAvtK1/raFysnbF9zYmxfheT7ou2+Cok8i8OUJ48VS/sqJDSa
8QGSfLBYquzLTNYlkrIWYamS40ILfQgXa4gJlgr7Gkfsq1hgX+ME9sXKCdvXXIF90W/S8XDP
a+Lxc/35yqKxRfrN/3D4x8hFI3sRVqxs8XmSPqr44LFkdChWPD/mUJd2Iqxo7caKhmJHcFkz
aje8/mC70YnOs99k55JcsphLkgg++/QF/l8H9z712b9OJiyeOUbxovPZn8/NGGy0XyPw2bPj
eDs6OpRuB/s8GWuN075Ugf3yWPxWprxNJim0SVV8iLBktjJNhdBx12x5onK8BZ2nh+lcoyDt
eCw+7fjxFkmKxgmw3y5TyEeZwrEMGHe1QlnzWNFsDzxQ6fKYQ51+ibBkbcpqLEd/Zd4CQZnH
0mNW5onm86nKd9eQ73sU6BOPNdDbcA+UzuE5KY2K5CLCikeeH3UE068pSp5FWLLbcH/ZW2//
vh++X0IX3wT/XDNqzy8RG/ixwz9ODKf3UlQL3Yisejrciv5fAavQnTvQlQ4r4U70JR2WI7t3
B+bZZkJwLlEWd07Xc6Zxcsk1zZvoFt4ZENl23arzFg/RgTYFeQuPNdB5y0Btd4958SqUC48V
Dc/v7dlnyjN+Fk0ZrkoXRFgyPKvS7TZCQ7uCNOSxElm3jyqUC48Vr7qtShdEWIlWbv4yjHLz
RxCcj0vLzTZSbuI0rzWeBUvKCbAZpsDtMAfmwmxYDBMRslmZmMac0/v0GEyex0PZ2E7SuUuB
nfBYiZx/dCqUC48Vr/mHKl0QYSVa/nFPGPnHbwgPbP7RTvKPToKzFdWppyAEuh9KapzYfRdJ
nx4F+s1jJbLddyuUC48Vr3avShdEWIlm97Vh2P158K+Rwdp9F7F7nOZ3hdQbxHWEeMgDekha
pWjR6zqPlch5AB57pkouPFa85gGqdEGE9WW0i1OI3AsVpCGPlci6XaBQLjxWvOq2Kl0QYX0Z
ul1IaChXkIY8ViLr9kKFcuGx4lW3VemCCCvR6m7bw6i74XUx07i6G+Yb191wmn8b8J6dU1Gb
barxNw0hDeL8IewRST0uXJ9qNGPq8Li/UsYfyuoGffZbLbx1l0RYsRrLwn67zIKPUkk+VK7r
hXFXW8h6taSseax49U2b6VckvunSCHgeqPEIdH0x6u/j03MNSU93mOnJYyVqGYt5cVvIxS0p
Fx4rXvWcpl+TAj3nsRKtjD0C/nlQeMzB8+ho4NKaPstiytjZnM3cC3Sd01pwgQ6Lod4YIXs/
PGCsLTsIQtc3zeTGFLDrnjqjLItV5xsexpfK24eHyMAbpn3wWImcb3gt5OKVlAuPFY88n9TM
dSGSfMMTBc+qdLuN8fPxadhG0vBomGnIYyWybh+1kMtRSbnwWPGq22a6EIlut0XAczyViTtJ
GYfHE+wHvNNU3zLxRySN2DKRtRnc7rwVlaa1qGZQh8pDHW4zylC2rMthfIhZcVLetTM+QF73
2wl/nWHqPo+VyHlCp4VcOiXlwmPFa55gpguR5AntEfAcb+MHsI3jMQJ3AN5/pW+ewI8fmM3Z
TLyOH6Br+lC/H6/fXYSH7jD1m8dKZLvvtpBLt6RceKx4tXszXYjE7rsi4Dke6wJ4jMD30fE/
Ars/L6gLsDbTty6wxLIuMDhO8oQexl/K634P4S+c9V9EWImcJ2CezeSCn8nIhceK1zzBTBci
yRN4rC+j7ZuiBf2lfBqmkDQsCDMNeaxE1u0CC7kUSMqFx4pX3TbThUh0OyUCnkXlGr/PKHs/
nPNoxtnj8gvvb/YS+h2t9S3v8LNsrrxjbSbS/cXSyfkgZsw9O/Y+U3Kcveo8o5CkbbnANgq1
4L7B4dgGj5XIecZCE7nI2o8IK17zjEJFPIuwIs0zHHFQX/aS/ACPyzgIfe2BPsvk8g9qPzj9
8V7cOvmrQMdWw5vUhPKO4HxUdl5qKoTuj5ehaCwHe47zqzwSP4ecO43doe6s31xV0+jaoHt0
j8vt0Ruq9aU1G/Xpt/p3h9dX3lmpL69wI6rw+kurUEKuSA7qCDhaY7bXeyKE4F6ErVBqSDoX
fEYKXyUSew4mQXAPRDbkkoMPZUbuQLV3vvE+1pGF0HetHjaUk+fpOm4FjpZ4Q3VYACMNu1zL
5C5VzPkRWEbsFh9ruTyID1X9PF9oyBtLbARcBMo7EBk6SG6UDMEdKtNIDuxkrI+OjseWk02s
JpfkJkOJBQ0jljiCWCHOnUeSdMKrZeGVasqNtSuSyJcN9UjNC9CvE8oWGfiVVeuaaqsa9UaX
u6nW42beDYR0PwZ+1xF410AVR3bIRE6SiZwsEzlFJnKqTOS0/iLTbUN1lGTppBhKDxH77W5P
TV2Vp6ahXq+obfCYfMgp/lCGLoqcwUXO1C0iZ8pEHiQTebBM5CyZyNkykXNkIufKRB4iE3mo
TOQ8mcjDZCIPl4k8QiZyvkzkG2Qij5SJfKNM5JtkIo8SR14Ky1AGk5qeDHqWXQexgx2+KkHj
M4F+6n79hbWo2rLWqPWFE/uDlnj9pTJZS2qytM5Mqk4tkR4Y448G0qOBdUF/bpSFWjAXNg78
9Bewi0kf/O3rCAQX4BX61qraJpc+wd+qnBi1IpR+d+xn/37pwYWY/es+yN1F7gdJ0DgSPHoj
rtOp08WpFamDPVsrF/lJ0AQkODgSVunuLU1VqHGtioSvjZ7zf9509YNyPwkOAQlJHAm31VRX
uxpd9etd+jqXZ5vLVa/Xuarq3RGTsOXnN/3c+7W7OvwkJAlISOZIWNGwzdWor2+or67ZYBBS
W1NX44lCCqf/r6eOfH/0NwkJyQISUjgS7ty8WS0JN/3i4FOPbF9DSEgRkJDKkbBUtTqyWcJ1
X6qAhDQzo1yqyChZUq770gIkPBHo42D7higJbN4OUm84pN9Ikn7DpsqmyqbKpsqmyqbKpsqm
yqbKpupfharB+lbiyUplHCfYYTKWeMCKwD83eix5Rv3TuDPZ7y+esHnK7XPmzl48Ud/qnuL3
IQe+QRvxGtNGojy+uWheq8NotLxtcPFmqwr/tGb7p4X+aS3gn/4ACSctLP/0B6QZ2dc/TXuK
gr7pRf300S3u45sO9w31vmm/zRwxerWoD9r2G9t+Y85vfLPtN7b9xrbf2PYb28EOdrD9xrbf
WOQ3Frc6Relj3U7lg0P6jSTpN2yqbKpsqmyqbKpsqmyqbKpsqmyq/lWoCvp+0pjOz5tlfT+r
58ydF+L7ob6Bzp8k/+RHzx4Q+n7mLXqT+H7ugd/vApi/K5T/ZzV2Zh3EzKODP8nuwEJnSNNw
/42ItiEA+u0rl+LYmO7eJAjwTEMrEulcdHMWWV0tpHfqRDKc/ZkjMNs7l/gQqF8hh+E/k7um
s0DzIXSW6zAIzrrNgNBZpKNJfF627CxzdgYvnuW6wUIG9P0CuMxyXC4+Fwf2e1QOLD8qVyKn
unNKM9+NHvM4D/qfCS/CorO4qYj4lcg1ULPK93PkA1Z8hDuLW4QlmsVNvcH8zHU2rdiZyavQ
sZnMoH6fs9kXSHaV5NAKV8I3QEdHFdSD2zhzQSPUQDXBHC/ouXltxZhj49m8wHXp3CFGL5P7
aFkO+d9r/I7IrTdwcpage/Xobk5P4LqgR4O/p37UhfF6Mg+fwL+XC/zfo+kZRPWG5En0oTen
wAActPj+w1+0BK95qnqnlD3Kxj9zsgg+aQk+7zrS+wh+P6fQ//3N5BeY72zY6vdMsTpGZe8Q
yN6r2bIfKNmzq7+vY9Ijlzn/GpMnpzD5dTJ3jgoVw5+EsSrvqKhIRS9/HZ3/HfwuumxSGt/C
XNOQT44K8K9M0QrBXQT3wvuB5xOYuFpIqSvsPYU0dGRL/pagowUdPvJbTq8vPgktHQgXMfQd
9Du31c/f8SQ5/vCKDB50LCIKcBoeMuEvvQ9P5Rx/7zyzAN49Ph8dC+Ct55bC28/MhwunlkH3
s4vhnWPz0VEGvScXw7vovPeFlXD1Tzvgo66N8Da67j6xBC79rgLFXw6+Nx4C31/3wYfn1sNH
L98Ln76+BWGjOM8ugY/Pb4JPX2uEl37qgvLKK/DxyzVw/S/fQ9gL4JfeVlhU+TE6rsBnf2iC
C8/dDu+d88D1a1fgv9/6Ah5/4nN48fQ1eK+jEnp/vxGufXIBLiM6Pzy3Di68+C24+s834B+n
vwt/e6YCfv3Uq9By8DP488kdcObMu3D8havw5LGr8OMjn8P1q1cQv9eh89VroOEwtm/At0eP
LS4unl1WXFw6m5yUjfXHR0dRsaZNLCInxSS++L6GcYpKi4vnFZGTMhK/iAuzI8Q3i2+GP3Hi
xKJ5EycuLCInpdb4N8+fMn3W3AWh95O1UYXjJ0+bOWduCF8ZTqez4JZJU2fMnMV+t8Q5JD9L
z8vLmzptegiOM3dEHg6TJk8Jxc9wjsP3bxk/IeR+8sgx+LZeUHgzm143jLwxL2/YTXlZzlHa
aOZPG5qVN2y4c0S+UwsJmYMGZ2Wn5+QOcSaHPkjV0tKdmtOZoXHBkYRjpnB3+XwKr7Ak2hlD
A3a1ko5AXXQayQdxPWQURLf609MEa47m9xGzdR/6LJurJ7F1pUhXf0pj7qVCcIxQCrmXQc6t
eMDlwiKSX+O4OtMSy7FoD9Frk5V0QuQ8ish5VpRyPkGwpqEXZnJyps/6k7N/14Um1MaqQpLW
DWm7jWuPsTMDlRu7+0IGJ99MCF09h45cG0g5s7o9gZH5hAFqswBpedPdW/i6Pn5WAuHt6CPC
ilWbhX5bs+ADJPlgsVTQWGIh6xJJWYuwVMoR45ZZ6EOppD6UKaZxtYXOrpbUWR5Lpn3K6ze/
Ow+r39HszhMPPDei3yPJfn7Lme/R6/xA/49P66+/hjaZcF6N8/gjpHGXQ/LJCRA811AumiRu
/GEk+u8rFdavX9/scrl89913n2/Tpk3CAz+3wqiurm7esmWLb9u2bb7t27f3ORoaGvoVG/p+
c1NTk2/Hjh2+nTt3hhxutzsssdfX1zc/8MADvtbWVt+DDz4YODAN4coD0dCM39+7d69v3759
xtHc3CyV7IiHZvz+gQMHfA8//LBv9+7d0mqD6G7G77a1tfn2798fkdrt2bOn2ev1+g4ePBix
2qJvN0fzPg7o/eavks2wfYKXLPoEFxu9UFVG3jNj6nCjXyaZ6ZcPq1+KCxV7uF6pnXd1HArp
8nAb/U2T5jY89kVL8Jrm7TqJz+McuzjjMBt/3vIxx/DVstPjTuHrkdkZpNuo1nieedKPn0U8
MAcofstkI37vDy8+gq+PHxxlXP8mrdGIX+nMeBzzRvulvMv9/OZPrjzF8nG4uPKUqE9wONM+
4eunV86ejarcWwPBXcL4cm8NKYfC2YlPhEXLb4dJ+e1QWH6vITSa8QGSfLBYKmgssZB1iaSs
RViq5Oi20Ae3pD7wWKJ6kMOk7kfbwSfq6gwaKgnu3eDvH9jC0ZBPnmkQXOGV18kK0pbOBPGq
tqkD0P7zQHCnMl6eHiJPb5jy5LF4++Lbfw6FbQIPodGMD5Dkg8VS1f4zk3WJpKxFWKrk6LXQ
B6+kPvBYkdjX7j0HQ+xrG7GvHwjsa5vAvlg5YfuaHmP7aoPgrl+8PNuIPI+GKU8eK5b21UZo
NOMDJPlgsVTZl5msSyRlLcJSJcejFvpwVFIfeCwV9nWI2NdTAvs6JLAvVk7YvmbE2L7aIbi7
Fi/PdiLPzjDlyWPF0r7aCY1mfIAkHyyWKvsyk3WJpKxFWKrk2GmhD52S+sBjqbCvp4l9nRXY
19MC+2LlVEH6y2JpX10Q3KmKl2cXkWd3mPLksWJpX12ERjM+QJIPFkuVfZnJukRS1iIsVXLs
ttCHbkl94LFU2NcrxL7eEdjXKwL7YuWE7WtWjO2rB4K7ZfHy7CHyDGfXNBFWLO2rh8jWjA+Q
5IPFUmVfZrIukZS1CEuVHPH3zfQBP5PRBx5LhX31EvtyaH3tq1dgX6ycsH3NjrF9pWjBnaV4
eaYQeRaEKU8eK5b2lUJoNOMDJPlgsVTZl5msSyRlLcJSJccCC30okNQHHkuFfaWT8UVjBPaV
rvW1L1ZO2L7mxNi+Csn3RTt+FRJ5FocpTx4rlvZVSGg04wMk+WCxVNmXmaxLJGUtwlIlx4UW
+hAu1hATLBX2NY7YV7HAvsYJ7IuVE7avuQL7ot+k4+FOaeLxc/35yqKxRfrNxxz+MXLRyF6E
FStbPEXSRxUfPJaMDsWK50cd6tJOhBWt3VjRUOQILmtG7YbXH2w3OtF59pvsXJJLFnNJEsFn
n77A/+vg3qc++9fJpMgzxyhedD7787kZg432awQ+e3Yc7//P3pUARlFk7epJJpmZHJOQABEQ
B1RuxiSEkEggE64VFAz3sa4kgYDRkMRkkEOQqMghiEE88Fh/3FVXRZBTBXU3sh7csIqKeHHI
EQSNgoKg5K/qrp6u6unuzNGTZJIq6HS/ruqaqlfXq6qvv66srNT1i7BbMdYalf2NOrRfeVzy
r5nK22SIjm1Sr3woxeXN10zDAI27JscTPfEW4nt6KJ1jdSg7eVzyspPjLUJ0wgmQv91bx3z0
1hHLgOIdo6Ou5XH584XgQJXL0wb96pdSXN62KS0sR21jXh+FMY9Mj9qYp/Q+n1797lj8+04d
6pM8rkB/iTtQdQ69k1Kqk16U4mqIeV5pkMpvup95VorL2y9x1/fXtz+oJd+VUBgPhHfNxPZc
idvA4wYBJ4bKexC0QqfCVp0M+sO/t4AR8M4wKNnAUDAa/pINDIbtvsz1nm0EkN4lipZdi3zO
YphYLIt9k/gVbwvw7YvdevctTlwHluvQt8jjCnTfEqgv3qO8VOioF3lc/uT57EMLVfOM/PwZ
w/WqC0pxeZNnver2cpyGtTqUoTyuYK7ba3TUizyuhlq39aoLSnEF27j5igfj5gogvY8rjpvL
8biJyryQ95NGyk6gBNjhbKUXSAPpIAt0hjGrjYnhxLV4XzyisH9DGBvX4nLepUM7kccVzP3H
Th31Io+rofYfetUFpbiCrf/I8aD/WIfzQPYfa3H/sRPHcw+0qe0wBvF7KGENpN3vwuVzSof6
LY8rmNv9SR31Io+robZ7veqCUlzB1u4LPWj3e4DAkUG2+1243aMyH0fZDco2QkPoA07hsjJy
/td1eVzB3Acg7JleepHH1VD7AL3qglJc9TEvNmK9t9ehDOVxBXPdbqejXuRxNdS6rVddUIqr
Pup2e5yGTB3KUB5XMNftvjrqRR5XQ63betUFpbiCzXab6YHthngxw2W2G8o3st1Qmd8G0Dc7
E+GcLZH/lwRjipTth5CHL3acp3uq/mDqEO7vRmI/lKwbot9mzjPeJaW46grLQv52b4183Ohl
PvTk9ULxjtHQ9RgvdS2Pq6HuTavVL1/2pm/0Ic+BwiOI/GLifp+8PMfi8izzsDzlcQXrGIvy
UqahlzIv9SKPq6HWc7H8putQz+VxBdsYuwoI70EhzME78CiWlbXoF02Msam4DWzCdeMOIPKc
FoJ8YANZoIhHyM4Cs3lu2UhA85tGyDAFJO+p2c+xWO9+w0nspcrbhxO3jwoP24c8rmDuNyo0
9FLhpV7kcTXEPL/NqdcFX/oNpx951qtuLyf2+eRluByX4RoPy1AeVzDX7TUaelnjpV7kcTXU
uq1WF3yp28t9yHNDGhPn4DEO4QkWA/SlKfcxcQUuI3JMXI7HRFTmaN7ZH46mhdAymAbHQxsY
yI+h5FgXQ+whRjWQ8W4tsQcor/trcd3f6WHdl8cVzH3CTg297PRSL/K4GmqfoFYXfOkT1vqQ
54aGH0BtHGEEhgH0/RX3PkGOH0jFbWAT17DxAyKnj7jvJ6/fu3D9Pulh/ZbHFczt/qSGXk56
qRd5XA213avVBV/a/S4f8twQbYE92BY4ptDu9yjYArtwuz+paAv0Cwpb4BSxXyqv+6dw3feE
/0UprmDuE1Ce1fSC/LzRizyuhtonqNUFX/oEeVz1Mfc1ctJ+qbwMjbgM23lYhvK4grlut9PQ
Szsv9SKPq6HWbbW64EvdNvqQZ6VxTf6dUfK+J9f+4OzR+IW+b/Y+PLfl3Mc75GeVjXco35tw
3fD1+2ImfB1JYO5J7H2Elzh7vfuM9rhsMxXaRntO+m6wJ21DHlcw9xl9VfTibftRiquh9hnt
dcqzUly+9hmGBmAvV+D+AOEyHgHu7UH0i5D1H+1x/4HKH32L24b/ZcPjHn43aTrsO6T3Ucn3
UsMA/X08i05YDvIa9VfxOHwMvjbzX4caXVSSW1CaP9nmtDnzy5y24im2QQVTbcn9ha/D24aO
HmUbnF0GU4X4l0bAgrwlVKojwFBeZ996DwYnfYuwHNzIazoW1PC9/mWssbdBNyB9A5F0sfiQ
u9587yDW3gz+eVRHHMCdq4d0WdjfZEOzwLZePKG36wNa8e1yItG75BHXq8BNuN2iY6KsD5K7
vFr8+/ItCmksAZwGYt4B1qEB90ahQPpCZTjugc1E6xPR8ajlWHGricW9SRxuQc1xS2yJWyHq
nVvhckJsWYipJpPnrgjBv8xXj7B4V/ptOGUOPv5RuXnTC3NLbaX5ZdMLnWXEsy5nEuJAzxpc
z/KxKgc2eBM4xJvAod4ENnoTOMybwOG1BRY/G2qDRYYK+Vpc2JLaB5Y5C6blOguKi2zZhcVO
lR8yK/+QxaYU2CILHGHTCBzhTeBIbwJHeRM42pvAVm8Cx3gTONabwM28CRznTeB4bwI39yZw
C28Ct/QmcII3ga/yJnArbwK39iZwG28CX60ceBC4CXYwYaZQYItmNghzzDUWx8k7gVpsv9rc
RGi2TOStPk9C/zSvoZ5FnUzElqxoM2PTaZ6vB4rjAB/T0y5e0Jf5sZCTemH+QL7/AnOJ8kGW
2BUYCRrAs2335BZOz7d1EmaVnf2uCDufC31uxZtL+qLsX6kBsXPxfSkJnCwJTlspsun0q4v5
vw7tNGv8CIeQBE4hCQZZEkbYyu6engsn13olIdL0mfnM7z9lCkkwKCQhRJaEAQVTpuSX5hdN
yrfl5Ttn5OcX2abl5xaV+ZyE0uNfflLRflylkIQQhSSEypJwS/GM/FLbpOKiKQWT+YQUFkwr
cPqhhamg8rWbIsfjJIQqJMEoS8LokhJ9kzB357lLB9PG4iQYFZIQJkvCIL2rI9klXKkJU0hC
uFqjHKRToySTcqUm3JWEV11rHOTakJgEsm8HXj1h8PqJEK+fYKliqWKpYqliqWKpYqliqWKp
YqlqKqmKst2Dd7LCiY0TtGFyHd4B6wKEd6Ovw37i/jRaTBb2izuV2Mf0SkvP6my7p8wu7CG7
VhLESTxHzJHEPB5xmMqFHUAzj3zJLi2+M3+S01ZQNKXYlgQnbMLeNJzDlTlzi5zihvSpEOEQ
3YsGtmhGTMtcG9Iv8tuaiVg7FiDBl5DyphHHXHY02IPf88DlJHdoUQ4BOlBrs70QTvmt4Q9O
857Y3MW9UTDPwMvLeAI5FxhIXImS/TpaYxBrFaeQOrEbssrun+R/7w6cP0EqoKQ7KekuSiqk
pGmUVERJxZRUQkl3U1IpJZVRkpOSplPSPZQ0g5JmUtIsSppNSfdS0hxKmktJ91HSPEoqp6T7
KekBSnqQkuZT0kOUtICSFlLSIkpaTEkPU9ISSlpKSY9Q0jJKepSSKihpOSU9RkkrKOlxSnqC
kp6kpKcoaSUlPU1Jz1DSs5T0HCX9nZKep6T/o6RVlPQCJf2Dkv5JSS9S0kuU9DIl/YuSXqGk
VynpNUpaTUmvU9IaSlpLSW9Q0jpKWk9JGyhpIyVtoqTNlPQmJb1FSW9T0hZK2kpJ71DSu5T0
HiX9m5L+Q0mVlPQ+JW2jpP9S0geU9CElfURJH1PSdkraQUk7KWkXJe2mpD2UtJeS9lHSfkr6
HyV9QkmfUtIBSvqMkj6npC8o6SAlfUlJhyjpK0r6mpK+oaRvKek7SjpMSUco6SglHaOk7ynp
OCWdoKSTlHSKkqoo6TQl/UBJZyjpLCX9SEk/UVI1Jf1MSb9Q0jlKOk9Jv1LSb5R0gZIuUtLv
lHSJki5T0h+U9CclXaGkGixF8tMX0Yk2LbI8HPMQHkr0NWM7Bd0txfes5RnY/uGIjQ1kMucT
16GElWOSWTNmPt7+eI4CZ0dhLq9z/FwpBM+Z2uC7j/JftxIxbCbZPqtBxZiKrMXwr8DzwMdc
M683+d8JI8JYcdzoHIV/qw02L1EqO+J0oRjs+DeNePYnZtvqEFRmrkVlJk2VoVSNQRtTfunL
qLO+4mVxRbryvBiHlnbITXju2hrmBkHBPARQ85k1OBiAWmG+ivCV7vNVC64SSfgQLeIKbCW9
wOaIDepIxB3KXC/mq0a+4Rnh/CZM8544XyVbj1F1vmrBqRBB5uJ8FXgwXzUQBz2+iPl0H19u
F8eXe4QXqDkg+nIYrsP7woloFk5NlOsDyTnEsxWUL6r7uS5fB1/fJV+U5jwFX6GTvl22Yd+a
6KTFjtmioFOhk0Zx/2VQtkIXbcBddIxiF02WA4nGljuLh120OORM9DI3IW5DjrA06U9+jDrm
J8fL/HBUfiLF/GRmD5iQNw2YY6LEO3sfF275k9EIvzMa4sporl8ZjSHXmQf2SkvN6uxXzqx+
54xz5SxPv5wJK+gNIGfutk6kbRTeI2hNNIFr8QA9keg8bieuc4jrXOI6j7gWragboDZiRSuq
H29FJUELKlfBgjIxC0pHC4pZLMFtQXHEWvx9ULoMDIr3tCyoEDcLSjzq2oLaTlgypTg+yYLa
IfMFLl8DkKjMkG8FZQVtl3XSNwShFSQNOTu8zA3ntlYh9K5jR/mVJZOOWdrpV5ZEQyjJzRBK
ahiGEFAZVBPxoHoDsYwRjvvsnURd3KEwYCa6D5jJKksObMBkAyYbMBvngLlLNiTSSw67NQfM
PaoD5i5Zf5wY1APmbi9zozxgJtf/gClNqPf4laUGv3JgqGXATFQYMPcQdXG3woCZ5D5gprAB
kw2YbMCsgwEztMEMmHs1B8x9mgPmfoUBU1qjF3OGfMV+Weit98p666SgHk73eZkb5eE0pSEN
p/v9ypI4nKa4DacpwTGcJhHDqbhtv5+oi/sUhtNUmPEUoE4lRqzh3iinOHJHcUcBIQlsxFUa
cbVQ3O9wwrGJjWqNblccOfSRwJ9kbV9+T+wdviPCSChudHcJ5w5qEfuZ2kZcEzHikkQZno64
h4GEuqLHRTK9Qp8CwBR49MEyeixSlrer8WEW0hoD8jjxNrp4Xuj2BgOZKtB2vI1zDBY5ZytD
Dt8k3s82OGThy/nlt0XcSj48ypYjtIS/RvDFlYa3+ev18M8rXLch6Ho8/DPKEMlfT4VHeUS2
W5y3Qc9OYdX8s0gpCeGVruuD+PoTxKcZmsbH0x3+MVkuDhavQcRFtzgL4P2LEUIYBOGtjpTS
HNNaSjOIltJ8W3i3IfJ4eF3GLBosVoCVMadc1+WxpwafAxkhNDILadwmqzLf47GlWS3dm9Jz
ImOnkl9bPDQq+RHMo7X8Xjn1HBr04lTiHID3UpX8RgKBoEvJD7220FXF7wm8Y6rk97Y4BHqZ
BwQWbqsS5zE8uCv5Xdbwi+OEBWklv37wxjUqfrnYz9s8lGvE+X+cehlt4NTL6H1OvYwOckIZ
eZvOEIPwHp1SnPEG9faQhP1iwXB4NdTAMz4W5tuyinILZ83OnwyiOa5/ceH0aUW2/sDEcfeU
2UGI61Y/dEtmYwErx9mgw9QeIIISbWXTp03LLZ0FC5K/PbJgalHBlIJJuUXOwlm2yZgaxmnr
lG3LsCXaE3t2zgQdhaC3FuV3txWX2pwzirs7cwsK4S/iSDPBNUIQZzfb5CnAzHE3Fc+w5UFD
r6DM5rwj3xXvJBi0lRB0aH5ukfD2Hs5JvOL9/uJ9NdYaW6f+tu62fp1t620jBw4FXYTQ6T2v
J7ldCoqc+aUwqaC14O1i4bF1ynfmikJn5C0QodicxfD5aSXwNsxiaUEujKVMfHpQN9uAQUXw
z5TJAVH2gFyYplyxAkThZ3OnlcB6UVYwO7+bpLSr1D37I8/PWLVi1Ur/ahUbMwJWqWGsWvlc
rbYJ9aorq1dkvZKWOb4j1lKGGqRJgH9Y/pnYMhVt0Gbw2bbw967HcSRBe2IAtBtGQvvgTmgH
PAFtsrex7fUhDHkM2kWX4RHH2UEWdw3I4QSbZh48P8/FQfvZCiq5luALTrAhDIZYEGe4Gk7P
rwZvgk4coCZFzXCemhETdtGWDQWS7RoGJHsU+Yn2J5p6ifYmWjgT7Us0XRPtSTSpFO3HKCDZ
hIgUVbQBUVyizYfsd2Tj2YFgz2Rh+wulMQdfx/M5Fq7Ruw3PYzusBZ5BWHGaKjmJB/sLbFfx
rN/YVkJowThs/6A5QyK+Rm1GXHs7TEwAyUlgBpbJ90g8nARu4gOtcpsE8hM5rsQ1CcwJlSaB
q2STQPmzw1H4kET+WTSXjwkFrnhsZiEefsXYmMPfR++gVhsWacaJ5vHVYTGDxevycOEaTWJN
oRWDxbysDF3FXw+CR4nFphknenaRUXgWpTkxUkrz4UgpzZWtDt+kFQ+vwdarbhKvHW1W3eTd
JDDeh0lgPI5bye86jUlgVw86CW/T0gs3LsWJEK6YSn5DNNI5HDdMJb+JQPlTAP7koQR3HEp+
szT8HtCYHD+By1bJ71UP1qS9zcNG3Dkp+X2oUUb7NcroIC4jPdOJOiejit/32C+Wf5fzJFAA
OsdwHAlii3DZVi60HrStMuCgnJiYBMI5rgt0IJTjxkM7AIYa5bKCgIXjnH2SUu2p6cj86ZOC
RuykRPgkMKILe1IPdNE9Ld2e1gtavz3tPdJ6Iruue1Jiij0NWRrde6XY05NQkhLt6Wk900AY
xw2GxktRgXNWN1sy/I/CqyemB+Dwn8+aWoZjY9AbuVVaGRY3hSLrKMfbxCxbA5NlZZvuJNDf
povHf63Q8gkHXYg4UmE3kAWb+2B4Pxt2sbcTXWkx7OZmwuN+2I2sgE//i+ii1sN7/4XP7oXP
fk50Cd/A5noUHm/yrzGTQ1k8zlM8tqtCsB0m2nRdcN7CsS0TgbuhLCB9b2Qw9kfpyMZDAgp3
Ox4CooFAXmLGvzETX6Oh8X7cHcZiIyMey//C8TUHArlCM2yv/RfH3RJvRJuwvfY5kL5M9g3u
ntCQfhRIb3hovffay4sNQPnHNtgGoP8bgCLkZg2QSDgqGOSmUW4Avq2wAfi2wgbgUSKMhFE9
KvtVSx1vAIrfH3aUSb8rQW6+V/VFFf64gq8wbzwq2zzsheeNrk+FEJuHR2U5cs0bPaceOKoA
/dCTekCkSDgKpPdDj8mmxmIW+xJYDYssiyIfvNubHl0oINBwXtreT+36HP/dMBKkEqJSQ7Tk
z/gnI8mEmJCJpHRXXdWRtQBgxAlnpIaqRZV+r6LSTI9U6tGbJrSi0Zw96sGVWeL1h63tWeJ8
//CkU331UnQcNhVkJnVsjDillpue6vq2eqjvGA/0fVxF3w6P9N2SzpCtu81VY8wxCbJMkb4x
vOnFuUoBrfD87ZmqR6ekTKgUq/mBX0LGzpoxxiXffHPbtku3jqjUq0Ta4sUwIgNR3aNcSWyB
CucabICR+SADtdQqp1YellNrzXJSt/DSPLLw+LeOGMSLQbyYhVcHEK8TihCvE/UM8TqpCvE6
IbNI03D/308B4nWCQbwYxItBvBjEi0G8GBaHYSYYxItVKwbxYhCv4IV4nWAQLwbxkm0Fk5PA
LAWIl4eTwGCHeL3KQ7xWuiBeqwiIV7kHEK8KAuLlICBe1QTE67AHEK9KAuKVwyBeTQzipQbj
elLD77UAQLw2aUC8PtIoo/9plNGXAYB4HdaAeB13QbwQQf8poEDNhQFAyYqIp2Tv8T89U+yp
Svgfe1oSf9E9Pc2elA6t30R7ao+UdB7/k55uT+/J43/SU+0pPTD+Jz3dL4xXU8txbAz60MJp
rRwrg7wCl+VtrjzHBCbPymbdqQaI8ooDj8OnXyF6qQ2wd/kAPrsPPvsF0St8C1vssQaL8orD
4R4nUF6vECivDQTK6wMC5bWPQHl9QaC8viVQXsc8RHmle7EHyFBeDOXF9gADj/KqUkR5VdUz
yuu0JsrrB02U1xlVlJc8r+kaKK8q/1FeVXWE8qoiIDKnZbNjMYv9FSAyVaoor+SGgvJKVkR5
JbuhvKoCiPL6QUWlAzxSqUf0iLSiUVM13NwhU7zeUdHTIV5zL17MDATKK1kN5ZWsiPKqCiDK
64yKvgd6pO+WdIYwjiuZRnkl0yivZCWUF6rWY9YnFoE/x7lQXV+/NaGjfakk5/17/uG/th4X
EJRXMoXySlZEeSXTKK9kN5RXVR2jvG70yMJLYSgvhvJiRx2hvM4qorzO1jPK60dVlBeZ3lAg
fC8Q9f9/UUB5nWUoL4byYigvhvJiKC8Gx2GwCYbyYtWKobwYyit4UV5nGcqLobzw9FAse3IS
OEgB5eXhJJAReTEiL4byYkReQULklUIigFIUMU8pXgOAevSwJyqxPKXae6SlCwCgHvbUJGj9
JtvTktMxr1WSXYD/pPW090oV4T+pKToTeTXmDCsSedEZVsZ4BS7H28QsWwOTZWWbjhF5NW4i
r95ebAAyiBeDeLENwMBDvKoVIV7V9Qzx+lkT4vWLJsTrnCrEq1q2edhbA+JV7T/Eq7qOIF7V
BD7mZ9nUWMziTQr4mGpViFdKQ4F4pShCvFLcIF7VAYR4/aKi0sEeqdSjT/a5Q7yu/HHcIc7f
TTO6u4i8bvjv8oBAvFLUIF4pihCv6gBCvM6p6HuIR/puSWcIg7hSaIhXCg3xSlEj8or+78IN
n/5tvAvSdXX6J1clTB3rkru90eb+20pGBwTilUJBvFIUIV4pNMQrxQ3iVV3HEK8MWAJpGhZe
fwypGzp6FIN51RHM6zCzpBqtldea4zTviW39vCLM63w9w7x+VYV5kek1AuETHWgMuEUB5nWe
wbwYzIvBvBjMi8G8GB6H4SYYzItVKwbzYjCv4IV5nWcwLwbzwtNDsezJSeDNCjAvDyeBh/lA
lYowr3IC5nUYw7z4bycYYmqFeZUQMC8bAfNyEDCvGALmddEDmBfA0C60BFwRbnNN5BIIMq91
GOaFwq+yxNQK81pJwLyyCZgXrB+uNIPWtcO8DhMwr3KvYV4JPkwCEzRgXp00JoE34AaiJ2wn
TQNC1F8DQnSzRjpHaMC8cgIA87pbA8o1G3ckSn7zNaBcKzX8Xg9AOWzWgHl9rFFGn2iU0aEA
wLyOaMC8TrhgXhQISLZQjmwLDXorhNzxAgSU0sPeUwEElGhPTk/sgUA9iNWpVxJPbsXfElBA
iRgFlJ5mT09EKKAk9IvoSV+BXk0uy7ExPwGBNEIzyyqUXgHK8zZXpmMCkmlly64qAGCvBPzX
CjrC37MTHU4v2BnAOQgYAu8Phx3tRKJDLYHhZsEO70FoyTwJO7DXiOc2wg7mQ/jsfvjsQaJj
+A422u8VwV4iDCGBAHt1JCw7O+4Iw4GEF0adUT8C7DWEAHsNJ8BeEwmwVwkB9pqFw6IB8kEg
8Xk9SYC9XsPhmwMJH9sCSHhYZK3tJ8BeBwmw13cE2Ot7D8FefbzcCmSALwb4YluBgQd8XVAE
fF2oZ8DXRU3A1++agK9LqoCvC7JtxD4agK8L/gO+LtQR4OsCgZa5KJski1kcqoCWueCGlgnD
QJLkekN7ReFhyWXgxMa43VLXsNlDPIvZA9zR7yqaHOaRJn2k8nril9tdVF7U5J+vbvrjvLyk
8roQQJzXJRV93+qRvuOBIpUX1HtzoMzjpYjw+kvGxo5cOwnh9b8lZ7ffdVYi8frrVx3v/HyL
fiRerbGlpUDihZZeY2PaYPNLicELzQ/Uy6alh2WT4CO2qy/DdjFsFzsaHLbrsiK263I9Y7v+
UMV2kekNA8I3pqfg7lZulF1m2C6G7WLYLobtasTYrgFNES0xoHa0xAAGwlHyHOAhtotVK1at
vK1WHmC7WLXSrFYM26VUr6RFi8sM28WwXXh6KJY9OQnMVsB2eTgJVMN2oQlSJVgpUXgZJWyX
LaR2bNc6AtuVQ2C7KglsVzaB7UoIqR3b5QiXKLz2ExReiQSFVyVB4VXpAYXXOgLbVU5guxIJ
bFeOB9guRNvlwnnVGbZLzeDvqjEJTA4Apqi3Bm5okAZuaJhGOkdrYLsmBQDb5dTAds3V8Fug
UQ5Pa2C71gD9Kbze0sB27dAoowMaZfR1ALBdxzSwXadc2C70HvaZ2lA/tk4l9oG90lKzOqPx
3HfgT1qSPU0J+JNsT0vCJE+97Elp0AROgqdemNbKhfrpYU9Lc33Gzy8er6aY69gYRMFxtqHl
epuYbWtgsq1s4Z0JIMYrDg4N4XAIMBML5BGwizbBrjgcdrnRsGuVOlYnDDcXHgtgp7ISdmSv
Ex3Wm/Dedvjsp/DZr4gOApF5nawV4xWHLbyuhIWXTGC8ehMYr0EExmsYgfEaTWC8JhEYLyeB
8RI7bjQILwASoddKAuP1OpAIvd4kMF7bCYzXpwTG6ysC43WUwHid9BDjlckwXg0S4/UCPtgW
XNPEeF1RxHhdqWeMV40mxgv9Ucd4cZwaxuuKbDsxUwPjdcV/jNeVOsJ4XSGQMjWyybKYxREK
SJkrQY/xuhJAjJcYiVyTIz3SpAsrRVhvSqCuWyKXu77JmLVlnOv6QLVZN/Kultj0ULAmY2M0
PNX1HOehnuM80DOnoudRHuk5wT3pmiCuj15avWpxWwnEdffLbV6uuFkCcbX51yOrn5o5VjcQ
F/WVRSmNLphWS7dPMSoHUi+L1iCwPF2OAGG5bMxwUzTcbBpYrq2ccDAsF8NyGTglLBe6+3A9
YrlCODUsF5necL5fEfr5MQpYLjEsw3IxLBfDcjEsV2PEcg1siuiIgbWjIwYy0I2S50APsVys
WrFq5W218gDLxaqVZrViWC6leiUtWiCDnmG5GJYrhFjsIyeBoxWwXB5OAhmWi2G5GJaLYbmC
Gss1pldaur/4nl497CmJCvgeeDs1UcD3pNp7pvCoph5JPV2opmQB3pNsT0t3wXt61AmWqxHl
2gssV13mepuYbWtgsq1s4TEsV+PGcmUxLBfDcrGjwWG5jJwSlgvdrU8sVxinheUK18RymVSx
XEbZdmKWBpbLyPmN5TJydYPlQr8jTpbDZJNlMYtjFZAxYhaDF8sl17CeWK5wFU2O80iTFJYL
W29KWK421Rtd+K359rtc18/MfThwWC7JmlTAckme6nrWE8tlUtHzeI/0nOCedE0s11RQ+dpN
kRKWq/T4l59UtJewXHN3nrt0MC2AWC4hjbVgudwDqZdF4LBcWRUGvgz7xbSXDQPhvJkpuGzX
Vf+YULyoOQBfhYGBPFVbVnZWOY4LeBgXcMUFXHHx5yycrngd0xWvY7qa65iu5jqmq4WO6Wqh
Y7pa6piuljqmK0HHdCXokq5mfFxW2Os1V1szEGZJI0IQRkiaJZlUuoemPksyQa3E8VZ2adhS
y+yoDKuV71pDwBE4Ly+BvkZgA5FQk/fC7nEyHAJC8E7Q8+BhPKfmsP24wCQOTVH0MGArdEhD
loTheQXPm8X7oYSlPBn+ejKR5kqHmHilmODA5oh3lXFrvnn25WO/HceJrPWJxHUOcZ1LXOcR
16v4FIrkmWRMV2rc3cRa/HNq8c+txT+vFv/lvCFgBPRcRhwWm7t8u+DVl24IMQeEPa6W/Jdf
lF11pnCOd4iyFZj4ydYcPuaFYBFYTMVQ8a5wHu+gIqrMc8lWsC5UmP2gGB4GS8BSxTS4YiiX
xxCCY7iPj+EROGd7FLzE7wka8QqQRu3XdCiMbzEphZFiCuEXvX2PaU15pKwPe5UvQ7HVeNLy
X+HTYKgllGfxWryKF4Ve46DzwHn8W5xXv+V5vBFexRuhkAeDx79l8Oq3PI830qt4I2V54BpB
XeIaQV3iGkFdMjSCumRoBHXJELR16fryBbxFIbc8Wha+36Lw/SmZyPo3hUu5FvSfDArdrBXp
bCB+11hLDVtAXM/gc4gspI58LUkDw7nbAbK8BHkxN5ybSMiHDMO5HELuGjqcyyXkOcbhXB4v
P+SaCCm6zPau1AgpX4jPi4DwYtka0Bnnxa5mxAgZTcxCxt31WK2L1IwrIKh1goZar3O4VwSD
6tK3Z2qtRQ1ABzWEK6hhMVPDAt7oVjbOK/mGsy5Uq5ENdrh3baIC4n1QA3IdKDWEqjaKP4Dc
DPavOQFSgWpxkM3pH/zSbJjMeg+tQIn6k1e3GdcMUf3xbtnqjp8yK9r+jkp4ZHk+Luo5evr3
hFi5lqi2MaFyedfGxMrlWxsDfrcx4GsbW8rUsICfnSvP4r3qasrlPS4IlBr06DCU1LBM19rg
38BTj7Xh0aauhgTeULcSJnJ7ftTEE5caiys7FVnX8lBxi9uURfRvJ30HiFipspW35cPdafzD
fCIqvNkyo82yLepYrLDEmwVDVoP5OPlfgWeABFYQhzNONrVGR3VdLU5TS2Dt8O4juiXejwcz
NZHTygMXp1FNbA5BZ2bw77A/o0+E51iPhrWzbgvPsO4MM1sPhY+yciDRB50l1ovOOpVX8Au9
HLgdHgb+EMEdFRoD+c6v51y7dWqEIxJWZwMVuzykGdauGHAElIDJMNLhHG9+mCRfs2uvWHKd
XU3uOZAOn7iKirs8hsxFKJ9YrelaDbnCLc1N4zUsOPlarriFLv6wGTcuM1CGR8jDy9RO6qlG
foj1RDjQbgay8MrxuSJLOAtWn3Cfdw7pNw2unY5OjkSXKpNcV740Ca31ZqlJWE0XI3qZc6w9
TG0i48wZ1tam0Miu5mBsEl1hCia6NYnMK2qxiGPTeNYkAtMkVq16MSibRI65mXWRJcc635xq
nWzJsBaa21rnWIKxSXSDKchxaxI//qEWS8W7+wetfXbEtz9ksiYRkCZRXl4elE1iveV89JcR
OdbPLAnWzREZ1vcswLonIhibRHeYgly3JvH3y+7PFw/Me6BV3yOZXV+aOntxu2ZslAhMkzhw
4EBQNglD5JnoLlE51g6RMdawqAxrdOTF6LZRwdgk7DAFeW5N4pZLCqsno1olbbz158zp2/eU
hNzXgjWJwDSJnJycIGwSJjAsLMGKliRKwzKswpJEhlVYkghUkxgWBsCZKACej5LO6dHCfXT2
vkkIizJmal/X7Ko9jqwufD4W4mWdEKLEcQhHoJYvTPySz7NhOVa05DMD6hYt+aCzIaD6vQNW
9WeJc45VuJ9jDZx+H64H/RrAgHCHeXVkP8sd4ZPNCyPbWsrD55iLI8NgvpNDsH5tnus3WQsU
FrAuXWrn7d36OM592c31XDy4gc/hnBqhz1gE/e7m85mCQ3QtR+9Q3stvVcQjHgnsuvG/owTX
7Y5fBQ/Fvx7Nl/W6VMAPNagPReB9O14qRQjUMHAX/NvVpzKW4tUq40Tzf2LfsaxrNsp8LPYp
y9JmhebLsfMszmZSGYd6VcahQVjGGw1CGa+GglIZz+HLOIwqY7QnOm5UgbMwX16qkXypHrYH
plSleLVK9dZQg2WL8UNrWWgHyxPGF6xLQvta5hoXo5GH86FnhH9uReyCVuFsgD3AFqN0RvfL
4P0X8LkDvP+EUTqj+0vg/cX43Bfen2uUzout6qU6P8TXUo3ALTdGpeXO5Uu1JzDMl0q1J/w7
cti45F62ktJiZ35BkS03b3rRZESuFFWaX5jrLLgnH70dLzTrScVFztLiQlun6zt3Bx0Iy8u9
EoTxGamPqrC95omaLlw2V1Xzbo2FQ7ShB2p+Ac05ooF38qqBd+oKL56E/l3gORse2+E1Ou+A
5yfQi6Lw+j18Rr9XBa/F87vw+AWgNAjn5jj54vkA//vKVWGpxdeqcCeuCg+oVIX7+KoQDgxE
A0f7WOOTcAuvrXBR0uqycBMc5fzLIYu4+zHOvR8ofI6PBBkPDwBbmLaR6gnIgdyFWrXqRbRY
g2anyBznZXQ+deoUfx1MYRqjY+XDHHPMeePOlIfixZ+z/HqJONikAOkbMcwxx5xn7ixArwOT
Sys1jXB0ZmFYGBbG8zDS2GogxlamKRaGhfGlFYWwVsTCsDB+tqJQNs9jjjkf53liKzKyVsQc
c362ojDWiphjzs9WFM5aEXPM+eTOOModD7pAZE+WC8RIT/FfthE/4IswSruhwXcKeh6E17mE
jNreX+GRZMsvLS0uteXllqIvy00qLCgpyZ9sy3XyH5nLnQnvFRZMK3Da/UhrzdP4YiUPXUEw
HQ50JmDj3fh3tD1OSncehijyLYggFuFN6xBwB8jmQSyF0NZdwQNVvHErHVvK0XmLo4qPkQee
QZ3tNyAuYqhph8Q//E/Xu95CSl7kGdYF1mfaCbIjSwphAjQliACor3SMMA2Btyfck1t4Izxn
XQPAzENnV+4p+tQR83Gv7sfLJ9x/KnzNhA+uvvuI4bGqD1991vLq8GuN5rSBy94b+lRC8abx
L8xvve/zsduf7nW4eeLGX2+cMC+vrNOa5OXtv7qrZupHmfvmtXnp8p6oVFO7NybGHF1aNSfi
t+8u7D1z1bPRhe2+3hLS0nnkcsywd+91LOqT/90Xud+lfj5v+R9bLZee/CDrrRWr5t64odvg
qZ8c41oOPtXiuQXbT8dNLzjV+6luo77q3apL3AgubVzXsMObj466deSrt3331O7Wtw7d9J+e
28Z02Hbr387YC+/t+Pe9lVfAiF1bJ2dlj/sxb72t1/EH7vjPLSkr3331k/wVj4Se23Uwo/PN
qXe/9GL7wg+c1z+T3/ObvIwj7704cu/83ls2vH5kZnyLC2PjB35wJmJN3pX0iIL7+l5914a7
wr4sXP3k2tbGH18ZxT11zdPvnr67xc4Hxs/89uGyaZOnHFltuHb1r0PfW9vsUPNv1j82+8E/
J6V9lzndvmDiKx3PHZx35uPc1B4nZr3a8ey5F28+dNvFUeePZ6zan9sr/LOoiKMPDvj6/qxX
X3rpwRazyzpndIkZsydz4xvWiE2f/v5FO+vpL1afWfUSdyY19fffLk37tMdDNY4bLhWfd1w0
RfedOyYkb//0jsve/3nCjCO/LDsw8MnP7hn47L5Dvyb++NLmz6rP/S1+dUbbbY9sn/DWxmef
HNHu4nervx685LXbNrz+8/gJI38I79d2yh/OSSs7RuV+XrV0cosXhu7vcEfcJvOh0GkPpGY9
u0oQd1y9ecfZGq60eNoD53/s0+fTrUOrnh68vO0n/Wff9Ab33u7eF62XytvnTcgvmtwMc/Je
BesgIoPlQb79eDRgkm1wdq4GHy/7agnvytX4eJdYHjNnWK/CfLyrQDLseBCV+9U8H+9rXvPx
Sm6yAwBlPt4QoA8f7yiCjxd9KbsFjxcM4b+tI7LY7iCudwKSd/cO3HmheMknlHhvd9TivxPU
xpsrUtuT29TNXXcRMTWixR8BPOPJNTkk2cYPQav5WI+Ao+AYjiG35UDrnMhv8BPqPLkArOfb
zOt8DN+D4+CENk+uagxr+BhOglOgiuCk1RxUveLJ9SYmpTBkTDa/YmI8uZ7+FuPJVXeMJ5fx
5DKeXPW6xHhy658n94ib5fF224d+GP52Ec+TawuRcu0tT25ILTVMiye3E6iGNpvEe5vAVYMd
hGwyVIOddcWDK0RAE9AdVTWekNrMTYUA9hhTwwLeqJabzqOMLQ90//0/mZLx7AsPri9qAKBO
yCmVGsVxzRlFk6EqPcHUsAAIX7RVmk/6Rg4dFIytBgU1nNK1NgQtY2tVU1eDwNh6FWE0B46x
9bK5m+Xr2GXGaywmy9uxwiIgY2x1dxLL0vNh70cvCM+xbgs7Hp0XnmF9LWxP9OygZGxFy7vb
3ViW1ilMHZ55c17+S7NaOB6as3/j+A+v95hlaRX8DcSyVA2CgmXpKtm9+mdsdTi8Z1kaVefE
Y8vCL0bcY8qxbghvEznClGF9Jjw08k5TMDaJ4TAFO9yaRKVHjK1cg2gSnH5NgmsATcKdsTU4
msR9pvLoKeYc6z9ML0b3M2dYHzYtjZ4QlCTGI2AKdro1if1/uj8vbjNNGhj1cm5MDzZK1BVj
azA0CYGLDxmbiINPMDYzrIKxGTxNwjOuuCP1xMV3GXPxXYO5+JYEmIuvvvT7fb1w8R01Oszt
LP0sYWGTzX+a21rahs0xHzdTXHxe0TiBTnWv30Bz8b3GWyAxFE8bik0O02mIPHy9w5+M/ci0
sNnE8K2x/zBNajYj/JPYh003N/Odpiv4yncZ5uF7QIWHb3XQ8fDdHJpl2WxcYC0OzbcsN+ZZ
F4bOtcwyDiF5+HK84uHLuRkmZAF8Hp2zYOvfbJTO6H4xvJ+Hz/nw/nKjdEb3F8L7Q/B5Lrw/
yyidhwSEhy+0Fh6+1/lSTaZ4+BD6yhMevrGjgoeErytPwrcVk/B9qgMJHyLb6yoj4dtOkPBt
VSHh24rJ9z6VkfDF4/On9ULCt4aR8CmHYSR8QeJY+TDHHHPeOEbCxxxz+jlGwsfCsDAsDCPh
Y2FYGEbCx8KwMIyEjznmGts8j5HwMcecXq2IkfAxx5y/rYiR8DHHnG+OJuELNDHcD5xADPcV
PP+lJU8MN+abYdsSE7r/4/aEqEExeQdaJn47K3fDzI1J7TrYHyt54fbl71tGnRgyZNLKN06u
eeNoj93Lph38My01Litv8E3vvNFn4n9+Ot9m5W//ePavoHxXK3DadOjewvs+vXPnyJSq7fNP
vbkz9Y4z7+xpMWQg+N48Oz+kYsvF8EUfTx18/1Ob2lw37b/3Xzc87aU+hXnNXrSvOz408XJa
q02Rmx/tNuOPf77avrORq3kSzHOOHP3ly2Pe+9+plMV92w4ZMSNl3dIPCpcdKwejr/Rrd6zF
+MQft3T9vy+jlo1fu27uv98a91zXdUfb5ufNfvTUuoeWD4z748/ox/6c++PHEcsvrr1mhvXx
kQfWN8v44t7Fa95647N3fow787+ZX7UMv/2Zvy+auc/y/C3DHvzriMQkW8HIr+afWTDVWvVA
7uF/gq8dL1f1v1x46e+pJypXhB4e96/4Zne9sHZZ3Lq4y1uW7Dnz69bS8y90ePZE6vgtbxf+
NvOw9WDZmI/ahmw9dO9MZ9Sh/51fv/PniydWl3y7/J3Bj8X/vdPM1yb/c32rj15ecc3Y5QtP
5y7p2a/H5rKEBf36VR/t0jU3+5mbT/T8fNvKTV2HPb4w/FzRF9dufH7F7m47TfctmT9U+nff
hx12zcv/21+fNf32+fN9vt0668tj1uZnzL+F3vvAe23ODLzyYCa38Pm9C0nmtlbuzG3J6NPM
jLmtNlcLc1srN+a25jxz29pamdsekjG3SXArdea2UKA/cxvKjcjctgtIPGq7ies9QI25jXxC
iXltdy3+e4A3zG0h+Jcl5raRKDfwGA18ZW57g4/5NPgBnMExHDrx0fn512/zmLltHR/DWfAj
+MlH5rb1+FXen8EvjLmtVseY22jHmNsYcxtjbtOrLjHmNsbc5l9dEhhVTrtZHg2FuW2XjLlt
t4y5bU99Mrf9oGo8IbWZmgpl2RmmhgW8US03nZskc9uPmjOKJkNZ9hNTwwLgRvnUVJnbfta1
NgQtc9svTV0NAnMbycjGmNvcF2VEue6Z2yxWgbnNbhWY21pYg5O5bSRMwS6PmNvEBcR2K5Y+
99DcPzMbKSdPK9k9xtzW1JjbRsEU7GbMbVJ/WN9NIniZ2wxWgbmtg1Vgbou2Bidz22iYgj0e
MbetztyWmLPj+8ysX63tr9oQ5mCjBGNua5LMbacZc1tA9Xu2XpjbTmDmNgtmbmvPmNuAnPtn
be3MbTxMhzG3NczyrY257Y1GyNwWeoc3zG2hdzQ+5rZ1jLkNMOY2AbXFmNsUwjDmtiBxrHyY
Y445bxxjbmOOOf0cY25jYVgYFoYxt7EwLAxjbmNhWBjG3MYcc41tnseY25hjTq9WxJjbmGPO
31bEmNuYY843x5jbGHNbwJnbWrszt6Uw5jZPXC3Mba3dmNvieea2DbUyty2QMbdJTp25jbyv
F3NbEpCY2/YCiUdtH3G9H6gxt5FPKDGv7avFfz/wj7ltDDzGwmMc8JW5bSMf8zlwHvyKY7BG
/9Zhwfdfe8zctomP4TdwAVz0kbltMx/D7+ASuMyY22p1jLmNdoy5jTG3MeY2veoSY25jzG3+
1SWBUeWcm+XRUJjb9sqY2/bJmNv21ydz23lV46lJUZb9ytSwgDeq5aZzk2Ruu6A5o2gylGUX
mRoW8PNE5flkE2Nuu6RrbQha5rbLTV0NAnNba8CY27QWZUS57pnbfo0WmNuuwsxtXJAyt42B
KdjrEXObuIB4+W8Hn1nzemxj5eRpLbvHmNuaGnPbWJiCfYy5TeoP67tJBC9z27ZogbntRLTA
3LY3OjiZ28bBFOz3iLmtovuuL/LTfskc23fXucNrr2ejBGNua5rMbecYc1tA9fsbY27zUb+B
Zm7bUDtzWwpjbmu45Vsbc9tGxtzWCJnbNjUB5raPa56q6caN4Kpq3qmxcHYY/EDNL6CFH8xt
CEO3EvrzeEN4fAyvh+PzU5ix7R18tmPGNvH8DmZsO4DPLXDyRQa3A/XC3LaZMbcph2HMbUHi
WPkwxxxz3jjG3MYcc/o5xtzGwrAwLAxjbmNhWBjG3MbCsDCMuY055hrbPI8xtzHHnF6tiDG3
Mcecv62IMbcxx5xvjjG3Mea2ADK3pZUbcCVBKLfs0uI78yc5bQVFU4ptSQq8bSQGi7VNUI7+
dCOQUAJmC+mGo9qYHb/yGQLugn+nwaMIHit4eJU3rqtjGo8yM+BRVWi4c7LLKj7npsWIfUMR
/2sDZ5bklxZMyy9y2gbkOvNBMd8TJCffcENyYnIiEIJzfPBoOvjgATAwnyshkIEPhMBjw4qd
+XnFxXe5BQnhg5ikOkR7h/LeUdTP5JfSYYx8GLMQhbN4UnEh7R/G+/M38P2HwXU4C4alNX3R
sWf37r5KepP6zTRHCP8KRo2fjnP8PwAAAP//AwAPrMZX</Template></GraphPadPrismFile>
