# Supplementary material for: Sorting nexin-27 regulates AMPA receptor trafficking through the synaptic adhesion protein LRFN2
Source: eLife journal article supplement (doi:10.7554/elife.59432), 2021-07-12
Supplement: fig3-data2 [file elife-59432-fig3-data2-v2.pzfx]

<?xml version="1.0" encoding="UTF-8"?>
<GraphPadPrismFile xmlns="http://graphpad.com/prism/Prism.htm" PrismXMLVersion="5.00">
<Created>
<OriginalVersion CreatedByProgram="GraphPad Prism" CreatedByVersion="9.1.2.226" Login="nskjmm" DateTime="2021-06-17T15:12:15+00:00"/>
<MostRecentVersion CreatedByProgram="GraphPad Prism" CreatedByVersion="9.1.2.226" Login="nskjmm" DateTime="2021-06-17T15:18:37+00:00"/>
</Created>
<DefGraphButton ButtonID="201"/>
<InfoSequence>
<Ref ID="Info0" Selected="1"/>
</InfoSequence>
<Info ID="Info0">
<Title>Project info 1</Title>
<Notes/>
<Constant><Name>Experiment Date</Name><Value>2020-09-22</Value></Constant>
<Constant><Name>Experiment ID</Name><Value/></Constant>
<Constant><Name>Notebook ID</Name><Value/></Constant>
<Constant><Name>Project</Name><Value/></Constant>
<Constant><Name>Experimenter</Name><Value/></Constant>
<Constant><Name>Protocol</Name><Value/></Constant>
</Info>

<TableSequence>
<Ref ID="Table15"/>
<Ref ID="Table18"/>
<Ref ID="Table21"/>
<Ref ID="Table12"/>
<Ref ID="Table24"/>
<Ref ID="Table76" Selected="1"/>
</TableSequence>
<Table ID="Table15" XFormat="none" TableType="OneWay" EVFormat="AsteriskAfterNumber">
<Title>Fig 3C TOTAL LRFN2 levels after SNX27 shRNA</Title>
<YColumn Width="133" Decimals="0" Subcolumns="1">
<Title><B>Control shRNA</B></Title>
<Subcolumn>
<d>100</d>
<d>100</d>
<d>100</d>
<d>100</d>
<d>100</d>
</Subcolumn>
</YColumn>
<YColumn Width="134" Decimals="8" Subcolumns="1">
<Title><B>SNX27 ShRNA</B></Title>
<Subcolumn>
<d>23.78367511</d>
<d>52.74458874</d>
<d>26.52585846</d>
<d>73.69404892</d>
<d>72.89191539</d>
</Subcolumn>
</YColumn>
</Table>
<Table ID="Table18" XFormat="none" TableType="OneWay" EVFormat="AsteriskAfterNumber">
<Title>Fig 3D Surface blots GluA1 after SNX27 shRNA</Title>
<YColumn Width="133" Decimals="0" Subcolumns="1">
<Title><B>Control shRNA</B></Title>
<Subcolumn>
<d>100</d>
<d>100</d>
<d>100</d>
<d>100</d>
</Subcolumn>
</YColumn>
<YColumn Width="134" Decimals="6" Subcolumns="1">
<Title><B>SNX27 ShRNA</B></Title>
<Subcolumn>
<d>62.1078</d>
<d>87.79715</d>
<d>41.60494</d>
<d>59.52733</d>
</Subcolumn>
</YColumn>
</Table>
<Table ID="Table21" XFormat="none" TableType="OneWay" EVFormat="AsteriskAfterNumber">
<Title>Fig 3D Surface blots GluA2 after SNX27 shRNA</Title>
<YColumn Width="133" Decimals="0" Subcolumns="1">
<Title><B>Control shRNA</B></Title>
<Subcolumn>
<d>100</d>
<d>100</d>
<d>100</d>
<d>100</d>
</Subcolumn>
</YColumn>
<YColumn Width="134" Decimals="5" Subcolumns="1">
<Title><B>SNX27 ShRNA</B></Title>
<Subcolumn>
<d>19.78022</d>
<d>84.31373</d>
<d>17.45413</d>
<d>22.05805</d>
</Subcolumn>
</YColumn>
</Table>
<Table ID="Table12" XFormat="none" TableType="OneWay" EVFormat="AsteriskAfterNumber">
<Title>Fig 3E Surface blots Transferrin after SNX27 shRNA</Title>
<YColumn Width="133" Decimals="5" Subcolumns="1">
<Title><B>Control shRNA</B></Title>
<Subcolumn>
<d>100</d>
<d>100</d>
<d>100</d>
<d>100</d>
</Subcolumn>
</YColumn>
<YColumn Width="131" Decimals="5" Subcolumns="1">
<Title><B>SNX27 shRNA</B></Title>
<Subcolumn>
<d>81.99513</d>
<d>101.7562</d>
<d>95.3668</d>
<d>107.8431</d>
</Subcolumn>
</YColumn>
</Table>
<Table ID="Table24" XFormat="none" TableType="OneWay" EVFormat="AsteriskAfterNumber">
<Title>Fig 3F Surface blots LRFN2 after SNX27 shRNA</Title>
<YColumn Width="133" Decimals="0" Subcolumns="1">
<Title><B>Control shRNA</B></Title>
<Subcolumn>
<d>100</d>
<d>100</d>
<d>100</d>
<d>100</d>
<d>100</d>
<d>100</d>
</Subcolumn>
</YColumn>
<YColumn Width="134" Decimals="5" Subcolumns="1">
<Title><B>SNX27 ShRNA</B></Title>
<Subcolumn>
<d>82.05128</d>
<d>30.66667</d>
<d>64.65177</d>
<d>18.01619</d>
<d>29.7235</d>
<d>64.99443</d>
</Subcolumn>
</YColumn>
</Table>
<Table ID="Table76" XFormat="none" TableType="OneWay" EVFormat="AsteriskAfterNumber">
<Title>Fig 3G IF internal LRFN2 after SNX27 shRNA</Title>
<YColumn Width="161" Decimals="3" Subcolumns="1">
<Title>SCR shRNA T=2h</Title>
<Subcolumn>
<d>0.452</d>
<d>0.35</d>
<d>0.371</d>
<d>0.405</d>
<d>0.298</d>
<d>0.275</d>
<d>0.197</d>
<d>0.405</d>
<d>0.26</d>
<d>0.318</d>
<d>0.122</d>
<d>0.208</d>
<d>0.298</d>
<d>0.143</d>
<d>0.255</d>
<d>0.279</d>
<d>0.197</d>
<d>0.132</d>
<d>0.161</d>
<d>0.221</d>
<d>0.332</d>
<d>0.336</d>
<d>0.385</d>
<d>0.17</d>
<d>0.422</d>
<d>0.189</d>
<d>0.243</d>
<d>0.328</d>
<d>0.254</d>
<d>0.361</d>
</Subcolumn>
</YColumn>
<YColumn Width="181" Decimals="4" Subcolumns="1">
<Title>SNX27 shRNA T=2h</Title>
<Subcolumn>
<d>0.576</d>
<d>0.44</d>
<d>0.618</d>
<d>0.472</d>
<d>0.597</d>
<d>0.411</d>
<d>0.472</d>
<d>0.142</d>
<d>0.428</d>
<d>0.201</d>
<d>0.402</d>
<d>0.488</d>
<d>0.234</d>
<d>0.15</d>
<d>0.36</d>
<d>0.0748</d>
<d>0.185</d>
<d>0.343</d>
<d>0.254</d>
<d>0.152</d>
<d>0.288</d>
<d>0.452</d>
<d>0.457</d>
<d>0.264</d>
<d>0.36</d>
<d>0.402</d>
<d>0.279</d>
<d>0.288</d>
<d>0.484</d>
<d>0.316</d>
</Subcolumn>
</YColumn>
</Table>

<!--Analyses, graphs and layouts as compressed binary. Don't edit this part of the file.-->

<Template xmlns:dt="urn:schemas-microsoft-com:datatypes" dt:dt="bin.base64">eNrsvQtgVNW1P7zOTF4zIS8IEEHwJCICQSJvSIAQFMRb5KYQwdb2QsCJREICmQmoaIifAl4V
b1K1ta1W7L3/1sclFaWK9JX+v/tXSaTae/1qv8+rVasGwQe3rVgFmW/vc/aes2dnn5PZMzth
Rs8Oh3POnHV+Z62119rvR/UlS5ZctqJqhtY2BADatXbNg/6/Bq7yPAwb0C+3eSEq4HsNnT3o
8I9DZ3QRgEaINVwGi4S/e9qqLwS4FF0NRce16EhHx9/Qp5ahcw468tARRgFTZzAHDhp5jt8d
jg4sSxGY77rBDW5wgxvc4IbUCVno8OFSBjqySZ6e46rFDW5wgxvc4IaUy8/9JB/H9fZcUmd3
gxvc4AY3uMENbnCDG9zgBje4wQ1ucIMb3OAGN7jBDXLBa4y2+2AYwAvnAKzwAixL6/8tq5cd
D7dboWmQboywgzR4IMYPP3CWBM5owwMTM9GfNcywqrm+tsHhnVlgDhqkoV0zdefRSgiOOeBx
5Q2b1jU5AFWgY4wQZyjB8RjH6vrGa69BR9AGZyY6SoU4HoJjjsmsqd8UCOrLA9v0FU2bahuF
OMMc+TFtYVWg+ZraxlpbuS5ER76jftKNHy6pbahf11zviFPgiGMO51waaNgaCNWvr40xzgmO
Gf8Lbzak+qgYoNW4woNU7zU6n3D4NtA7zTTvsHnnibrzRt2lkbs7jSs8rPQ+eCXTGpAaP7fu
YFU3uMENbnCDG852wBnzD4GWj5+DrR5a0nKDGwYzeBbONeoxWfCOUTJ9q80Hleh8ZePm2vrm
wDV6SA8FgiG9qU5fUn+tPv0SveYfa6qW6ctWLFk+TW8IbA00BPXaulCgWV+5/Kpps/XghhXL
q8APk7XoWiAuvmqetsi8KjeAoSMzOWiDcqPi8zFSTha6P0U0dhAmk2qBj3sXUYYLhFVDmqzM
M97F4+AWETS7cAl5nqXfhK7GSryhOsw3jBBgb6SqhI9jQPkCsOYEeolm0kl1LhPsR/LTEYD5
pGI4lFRYC0nFaAQ6RpLK0TnoGIWO0eg4l1S0K0EnX/QQDiCjMGLXOuFsoYFfU7uupaG2WW8O
BFsaQkHm3UjIsiqFnsi7BqqY2CND7JUhTpMhTpchzpAhzuyPWCOHjqIMR/I4EtmW2hcHQ/Wb
akP1TY16dUNTyOZDPvGH/LqI2M8RZ+sOxNkyxENkiHNkiHNliPNkiPNliAtkiIfKEA+TIS6U
IR4uQzxChnikDHGRDPE5MsSjZIhHyxCfK0M8Rky8BJaiBCYjKw30XLds4AY3fJmqu6Lqbbyl
xDWo2LLGKPXFQv3xjmQ9U52sISXZNeSeFJ12xHtgjFcMpEcj9QenehfbTxDbGx7pN7zSb7hc
uVy5XLlcuVy5XLlcuVy5XLlcfVW4ytFvI63RWUzjp580fOKWuDnoWEruNbCGTeGhT2ZPzErc
E6NvDU7RL2lqDDU3NZh9Mzuy07V0TctJ1yKS7Rnq2/LjtVdX0npaBiPx3IVvkQ6itfDIbgB9
d7Q2ntasfgzoR0LVdUp2hNzP0Q+lDB83jEa8DUX8Lr5iCabGfIe9APygxLZMpEv040z07j7u
WdYzafDCv3qgmMRDAelRoL0M+Yz82dz9CLCGWw0l1xpYw7C8JD7Z4W5jCT2v23Mg0mIMF5Br
zDoexnWNgw7o+8VwgpW4UnwtDuz3qB5YeehvlMcTJ054aiB6iBmtiRusdbVVfXhBWxX7jWVg
dXHg+0OIsJz8zmNhGedS+7TBGmqDdSHRL1VR1/857GFl1Bg58LN45ThIPuAkRyxYQ22w2DiZ
wPBeYtlJWBRXI6z3YAU6Nmvm7x9xPvtLknjh8ZJXwErQ0VELjRA0rgLQDPVQRzBfFLTjtC99
6M0XmTjQD707/jXGLvsODM4n/7cb5y8KPjJw7kcJXP5H+fD5sC2R++ItGuz1DTkH450Y8uAI
fH5ijPk9Gp8WantUmkQffj6seAs+D6m64f4vdlj3fDg+peL7LP3zz06CT3dYz3v2Hv8efv9l
8v2Lx5pnYL5zzVazn4q1Map7j0D3dNCmq3v1uvcw6dU6Jj4KmOuvMWlyOpNep3HXKFMxepcw
Vs3y6uoM9PLX0fWbYK0hi/Pm8cw9DUXkqMZ8YydGx1rybBd8FHk+gaHVonJdYVsqZIbDRXnR
50pyBnSuJGd6n4fOBWXo2BEOZ+H30bmokpzDxx6DHV0IFwn0bXSe02bKd8ArJ984xHYIHQuJ
ATwHt9vIl9VHpkpOvnefnA/vHZiHjvnw9sEl8M6T8+D9Q0uh9+kqePepeeiogOPPVsF76Pr4
L6+AU3/YDn/ruRbeQfe9zyyCD35djegvh/Drt0P4v3fDXw+vh7+9uAH+/vstCBvRPL0IPjmy
Ef7+cjP89kcBqKw5CZ+8WA9nXrsNYc+HR9rbYGHNJ+g4CZ/9Zwu8f3AxfHg4BGdOn4Q/vf0F
PPTo5/Cb507Dh101cPw/roXTn74PJxCffz28Dt7/zdVw6i+vw/8890/wxpPV8LPHX4Idez6D
Pz67HZ5//j048MtT8NhTp+C+vZ/DmVMnkbxnoPul06DhMK5vwD+PHVdaWjqrorS0fBa5qBhn
0qNjUqmmTZxELkoJvfh3DeNMKi8tnTuJXFQQ+klcmBUnvh29Hf7EiRMnzZ04ccEkclHujH/+
vCnTZs6ZH/17mjam5MKLps6YPSdKLr/P5yseP/ni6TNmst8t8w0tytULCwsvnjotCsdXMLIQ
h8kXTYnG9/suwL+Pv3BC1O9po87DP+vFJeez8XXOqNGFhcPPLcz1jdHGMn/asNzC4SN8I4t8
WlTIHpKTm5eVXzDUlxb9IEPLzPJpPp9f44LHiynTuV/5dCpTiy4nsPlSUaR80BUpi04l6SAu
h4xhyhAaV7YYzZVl2bIGLvs8go79BGu2ZvYYs2Uf+iwP+k5PoHkbLu9fifLCzShHrEc5YQCV
fnUIGUcA5ZAhMMc/DCFHNsHMZH7LAGvEUDr5zU+unWTA+cJCkl5jWp2pl+U71IfoPZsHFTG4
rJ7HED3PTFDPzxCsqeiFGZye6bP+9FyDdLwOWlAdqxZpWje0HTTuQxBk9JZNjjRyz+o3m9ST
6HM6jm0g9cza9gRG5xMGqM6CQznhd7WgrI+flaFjVQx1FhHWYNVZ6Lc1BzlAUg4WSwWPZQ66
LpPUtQhLpR4xboWDPZRL2kOFYh5XOdjsKkmb5bFk6qe8fR+9/XZb+8bPUlnmZnTem2bKW8l8
j94XRdp/wlp/7TW02ojTapzG7yWVu3ySTk4A61pDqahXXPnDSPTflyqsX7++NRAIhK+77rrw
xo0bhQd+7oRRV1fXumXLlvC2bdvC119/fZ+jqampX7Wh77e2tLSEt2/fHr7pppuijmAwGJPa
GxsbW2+88cZwW1tb+JZbbokcmIdY9YF4aMXv79q1K7x7927jaG1tlYp2JEMrfv/OO+8M33XX
XeFbb71V2mwQ36343Y6OjvAdd9wRl9nt3Lmztb29Pbxnz564zRZ9uzWR93FA77d+mXyGbRP8
wKFNsMpohao10p7pF48w2mXSmHb5WNql+FC9M/q+a+O8Ma9FNXl8XIjvJ89p+sEXO6x7mra/
TOh5nKeOTb+fpf/s0odwEw08ot09Et+/XuS/wqR8x3ie/ayJn0umml9HcE7cvtugP/6dY9/D
9+M+zRputH9lNhv0PQX+X2HZaLtU9WJT3oM5JaNZOeZklowWtQmOYOonfPn05AsvJJTvrSZ5
VUiQ760m+VAwxnyPx6L5t8cm//YozL9XEx7t5ABJOVgsFTyWOei6TFLXIixVegw62ENQ0h54
LFE5yGNT9qP14Gc2bTJ4qCG43wSzfWALx0MReaaRb6UJbLKa1KWzuW86+Vei9b8Q+X6HQJ8h
os/2GPXJY/H+xdf/PArrBCHCo50cICkHi6Wq/men6zJJXYuwVOmx3cEe2iXtgceKx79u3bkn
yr+2Ef+6W+Bf2wT+xeoJ+9e0QfavDvL9ToE+O4g+98WoTx5rMP2rg/BoJwdIysFiqfIvO12X
SepahKVKj/sc7GGfpD3wWCr8617iX48L/OtegX+xesL+NX2Q/auTfL9HoM9Oos/uGPXJYw2m
f3USHu3kAEk5WCxV/mWn6zJJXYuwVOmx28EeuiXtgcdS4V/7iX+9IPCv/QL/YvVUTdrLBtO/
esj3jwr02UP02RujPnmswfSvHsKjnRwgKQeLpcq/7HRdJqlrEZYqPfY62EOvpD3wWCr863fE
v94V+NfvBP7F6gn718xB9q+jtL9Q66vPo0SfaVps+uSxBtO/jhLd2skBknKwWKr8y07XZZK6
FmGp0iP+vp094Gcy9sBjqfCv48S/PFpf/zou8C9WT9i/Zg2yf6UTHZQI9JlO9Fkcoz55rMH0
r3TCo50cICkHi6XKv+x0XSapaxGWKj0WO9hDsaQ98Fgq/CuLjC86T+BfWVpf/2L1hP1r9iD7
Vwn5fqVAnyVEn6Ux6pPHGkz/KiE82skBknKwWKr8y07XZZK6FmGp0uMCB3uIFWuoDZYK/7qA
+FepwL8uEPgXqyfsX3ME/kW/ScfDHdLE4+f66ytLxBfpN7/nNcfIJaJ7EdZg+eIhEj+q5OCx
ZGxosGT+rldd3ImwEvUbJx4e8ViLnFG/4e0H+41ObJ79JjuX5AOHuSSp0GefNd88e7j3aZ/9
70m8PP8UxUusz35znr/aqL/G0WfPjuPt6urqkw5hlSXiv2NI3Jcr8F8ei/qk18YnvQp9UpUc
IiyRT3odym3suGs2P1E53oLO08N8rlYQdzwWH3f8eAuvonEC7LcrFMpRoXAsA8ZdpVDXPFYs
9sXncwMdL9/1qrMvEZasTzmN5egvz5svyPNYfuzyPNF8PlXp7mry/ZACe+KxeBuhWR1rI8lo
c3hOSrMivYiwklHm+7xW/LUkKLMIS8bPIDrv8owQ5GOeGK/jnVdUrTnL3YVuvgHmdkLUn7uI
D3R4zXFi/wZ43mw9XIu8ejpcgv6vgX9ERxV6Q0fHCvR0OUxD1w0QgK3oaDDmPddCnTHDq9mY
A70crkI0s9F1EDagd5ZDFVjzcrPBmnuUS66HENnoatA8Df87xWHnLvmZdzKY60xyncMc2Qyd
nxy5zHMnXdvFuep0LkTssUNBOsdjDXQ69/kbr9j6PH6WiF7aFeqFx0pE5g937raVGT9LpDyh
yhZEWDIyq7LtDsJDp4I45LFS2bb3KdQLj5Wstq3KFkRYqvJw2objhYGfd7H21QeMNhF+vQx+
nRB6abf+x8NX0zYY50DbocevudxYz0Of9prxHbzmBn7/1ezvGfhPfO9Y5Pv4jOnx86Fg7rOg
P3zYbKsYY/Gd9j1rQlukDec88/nRy1418DRGHr4Nx8uVjdg4HLw4CYff/LzX4PVfmuZGr4ly
v6kT/p5Gj/9OGkfm8/LzzfdXD/PfibGpf/1s/5r2Xx+3fqdy1I674X5j/Hzkd38U3oyvm3jL
cv01VG+GT5D71cPuNPjHtuG/0w+PgDmnxi5Orpr6v1MkTgyd3IWvMzh7joj3gBkX+y8z/YD6
CW2ztNvOifoPDZH5SQQPfxdzQXVJ+WDfM86EfsWDM+5n/ZBC0/fo+R4uToDEyZskHYg1TrwJ
1CHaof86xD2k7MzWITpIHQLnOXi9M7YOsJKpA+Qw5Wy2DJ5D+Mhlnjvxald3miDQwUCX0ztJ
ntOjIM/msVK5LNOtUC88VrKWZVTZgggr1doj1saQljxBZGDTkk6SlnQTnK0QhClg7RqVkST1
8x4SP0cV2DePlcp+36tQLzxWsvq9KlsQYaViHYaWT4dCdPmXhrV6dN2GDzXc/dmsE30hWNOQ
ls1enPP/pVJ5+V62zrHDqnPcy9c5SB3l3vjqHPdGdO+/16xziH6n9Hu/S+f/+6Nw6Dq7OeR8
F1++t6nDNFSkVJzc51iH+YHiOswPInWY+7g6zH18HYb9vkMd5j5ShzHOR5KgDvNADOWOI8Su
2HJHDyl34DxnAzougSZohBCK5SYUx9F9GewadnRXS3zNrquWqvWZoyT/SdcSz795rFQu1+B5
Bqr0wmMla7lGlS2IsM5Gv0M60XuJgjjksVLZtosV6oXHSlbbVmULIqyzYdslhIdKBXHIY6Wy
bS9QqBceK1ltW5UtiLBSrR1qcwzlQbwGegZXHsRy4/IgjvOrAM+PmIKOi2EqzI4an8Ie8bRL
xTpuLpF5E3huRzkz5o21Cfrs51psa2uKsAZrvDL77QoHOcol5VC5divGXeWg61WSuuaxknX8
oZ19xTP+sDwOmQdqzCldQ5aOo+LjczWJz2CM8cljpWreimUJOuglKKkXHitZ7ZzGX4sCO+ex
Ui1v3QvmXHc8rvQX6Gji4po+y2Xy1lnEBw4Q29gAdC17PKZUhypoNFrVboAbjf0DhkD0GvZs
n7GfG//pSzAvVp1uhJgxarx/hIh/tMfoHzxWKqcb7Q56aZfUC4+VjDIf1OxtIZ50I5SAzKps
u4MZs8DHYQeJw30xxiGPlcq2vc9BL/sk9cJjJatt29lCPLbdEYfMyZQn3kTyODxO6p8B7y3a
N0+8h8QRmyd2kDwRx/m3SP9DAyoZbEL5oQ6LjDyUzevymfEQOUmS33Uy4xl42+8ktt8do+3z
WKmcJnQ76KVbUi88VrKmCXa2EE+a0BmHzMk2Fgr7OB7vtBzwHnt90wR+LNQs4gMHtOQeC0XX
baT9fbx99xD77o3RvnmsVPb7Xge99ErqhcdKVr+3s4V4/L4nDpmTsSxwhJQF/izw+yOCskAP
8fteYVmgKiXKAkeZflLe9o8S249ljT8RViqnCVhmO73gZzJ64bGSNU2ws4V40gQe62zUfdM1
q5+Uj8N0EofFMcYhj5XKtl3soJdiSb3wWMlq23a2EI9tp8chsyhf02zGl2kxXieytynOv/Ae
tr9F57Fa3/wOP8vj8jss9wFiG/HuIZvFjLvLAGvefybTJpwpkTeqTjNKSNxWCnyjhPhGaYy+
wWOlcpqxwEYvsv4jwkrWNKNEkcwirHjTDE8SlJfbSXqAx2Psgb7+QJ9lc+lHCUk/cPzj+Yc6
+atGx1ajN6kFpR3WuiAZTFk5A/quI6JiLAd7jdOrQkKfT659xo6iVzZurq1vDlyjh/RQIBjS
m+r0JfXX6tMv0Wv+saZqmb5sxZLl0/SGwNZAQ1CvrQsFmvWVy6+aNlsPblixvAoxi5feXIHi
d1maZTrgabNdEvCrGKxtqNug3IiAAggjp9fgFNHYQZgM1vbXbCggBx8qjEQDA+PMbJ7xPjad
RYJh/2y4hDzP0nHlcKzEG6rDfBhluOtcJtEpZ673wlLizviYyyVNfCjv5/kCyCBD/8+BY0Bl
p5MBPCSRSmMG0dOB9T7GKelCQLlE7/kkdnAiM4w41nDioCOJc+JEexRxaLxQKl6ksNJYtsxL
vmyYR0ZhhH+dcLbQwK+pXdfSUNusNweCLQ2hIPNuJGSZGPhdT+RdA1VM7JEh9soQp8kQp8sQ
Z8gQZ/ZHTHeM11GU4UgeRyLbUvviYKh+U22ovqlRr25oCtl8yCf+kF8XEfs54mzdgThbhniI
DHGODHGuDHGeDHG+DHGBDPFQGeJhMsSFMsTDZYhHyBCPlCEukiE+R4Z4lAzxaBnic2WIx4iJ
l8BSlMBkZKWBnuuWQdzghi9L0EA89TTekugaVGxZY5T6YqH+eEeynqlO1pCS7BpyT4pOO+I9
MMYrBtL3I1OMf2LkhZqVChsHfvpTuJmJH/zrGQSCM/BqfWttQ0tAn2BWNicmbAh7hvq2/Hjt
1ZVY/DNhKLiZ/G6xoHEshPRmXKZTZ4trVl67c/SeoQtNFjQBCx6OhRV6cEtLLapzq2LhD+sf
+6R4ZS/RgkfAgpdj4dL6urpAc6BxfUBfFwhtCwQa9U2B2sZg3CzM+Unw0Czf5V0mC14BC2kc
C8uatgWa9fVNjXX11xiMNNRvqg8loIUHe3/8p/CvVhAW0gQspHMsXLl5s1oWNn2+aONrk+cS
FtIFLGRwLCxRbY5sknAmnCFgIdPOKZcockqWlTPhzAgLj0baONi2IcoCm7aD1Bse6Te80m+4
XLlcuVy5XLlcuVy5XLlcuVy5XH1VuMrRbyM9WVlMx4mfdJrgVny8XeNScq8x3dZ4SIPZW7wS
9xbrW4NT9EuaGkPNTQ1m//GO7HQtXdNy0q01q2mVXmNqTFTitxbObfMYPXLvGDK91eaDhQ6d
2JfqK1ua62pxLbehKRTUL2toqZoacy+25vZiC3uxtUgv9sdIOb6YerE/JpXNvr3YtD3J6sG+
tJ+WvMV9erBjfUN9D7bpWXsNz6A91W7vstu7zPUuX+D2Lru9y27vstu77AY3uMHtXXZ7l0W9
y+K6qSh+nGuzfPBIv+GVfsPlyuXK5crlyuXK5crlyuXK5crl6qvCldVD5GMaP30D1EO0rbv+
wM6cNmEP0dyFb5EeorXw77vR93ZHa+NpjZ2NB4PWv4M/2cDc08nWNNwwGvE2FEBffMUSTI35
xjslpXE4bZlIl+jHmWShtqi2qmfS4IV/9UQmjheQHgXay5DPyJ/N3dMJpUUQPWF2OFgTeP0Q
PSF1LFibJLG6ZSess5OB8YTZaxx0QN8vhhOsxJXia3Fgv0f1wMqjclFzajuHyILRoonUWMa5
0P+kehEWnRBOVcQvaq6BmgXDD5IPOMkhMyGcxxJNCMdkoknwbFyJNo/Dv3/ksCnWFbDS2PK1
FhohaFwFjG2y6iD2TbH4Td3S+lhZPvnf3K72i4KPIhuL5X+UD3efs9Pa/G2ntfnbiSEPjsDn
J8gG1TQ+LdT2qDSJPrz7nGIDcEiVuTEavee5Oj6l4vss/fPPTjI2BaOBbor1Mvk+v5kdfo/f
FEtjdO8R6L5dc3U/ULpnF5Jfx8RHAXP9NSZNTmfS6zTuGmUqRu8SxqpZXl2dgV7+Orp+E8wO
uzySN49n7mkoIkc1mItctIG1ueou+CjyfAJDq/XZJq9PWypkhsNFedHnSnIGdK4kZ3qfh84F
ZejYEQ5n4ffRuaiSnMPHHoMdXQgXCfRtdJ7TZsp3wCsnH17cIYSOhcQAnoPbbeTL6iNTJSff
u0/Oh/cOzEPHfHj74BJ458l58P6hpdD7dBW8+9Q8dFTA8Wer4D10ffyXV8CpP2yHv/VcC++g
+95nFsEHv65G9JdD+PXbIfzfu+Gvh9fD317cAH///RaEjWieXgSfHNkIf3+5GX77owBU1pyE
T16shzOv3Yaw58Mj7W2wsOYTdJyEz/6zBd4/uBg+PByCM6dPwp/e/gIeevRz+M1zp+HDrho4
/h/XwulP34cTiM+/Hl4H7//majj1l9fhf577J3jjyWr42eMvwY49n8Efn90Ozz//Hhz45Sl4
7KlTcN/ez+HMqZNI3jPQ/dJp0HAY1zfgn8eOKy0tnVVRWlo+i1xUjDPp0TGpVNMmTiIXpYRe
/LuGcSaVl5bOnUQuKgj9JC7MihPfjt4Of+LEiZPmTpy4YBK5KHfGP3/elGkz58yP/j1NG1Ny
4UVTZ8yeEyWX3+fzFY+ffPH0GTPZ75b5hhbl6oWFhRdPnRaF4ysYWYjD5IumROP7fRfg38df
OCHq97RR5+Gf9eKS89n4OmfU6MLC4ecW5vrGaGOZP21YbuHwEb6RRT4tKmQPycnNy8ovGOpL
i36QoWVm+TSfz69xwePFlOncr3w6hRdrEm2yoQG78ElXpCw6laSDuBwyBhJbSGo/wZqtmT3G
bNmHPsvjyklsWSnehaQymd8ywBoxlE5+85NrJxlwvrCQpNeYVmfqZfkO9SF6b7MoT5SexxA9
z0xQz88QrKnohRmcnumz/vRsbuDQgupYtUjTuqHtoHEfMjZ5oHpjN3Lwc/rNhuiFeOg4toHU
M2vbE6Dvxpuq6yw4lIO1EQxf1sfPyiC2zYFEWINVZ6Hf1hzkAEk5WCwVPJY56LpMUtciLJV6
xLgVDvZQLmkPFYp5XOVgs6skbZbHkqmf8vbNb/TD2nciG/0kg8zN6Lw3zZS3kvkevS+KtP+E
tf7aa2iVCafVOI3fSyp3+SSdnADWtYZSUa+48oeR6L8vVVi/fn1rIBAIX3fddeGNGzcKD/zc
CaOurq51y5Yt4W3btoWvv/76PkdTU1O/akPfb21paQlv3749fNNNN0UdwWAwJrU3Nja23njj
jeG2trbwLbfcEjkwD7HqA/HQit/ftWtXePfu3cbR2toqFe1Ihlb8/p133hm+6667wrfeequ0
2SC+W/G7HR0d4TvuuCMus9u5c2dre3t7eM+ePXGbLfp2ayLv44Deb/0y+QzbJviBQ5tgldEK
VWukPdMvHmG0y6Qx7fKxtEvxoXpn9H3Xxnljojauh48L8f3kOU0/MDeuN+9p2v4yoedxnjo2
/X6W/rNLH8JNNPCIdvdIfP96kf8Kk/Id43n2syZ+rlH6RP5LcE7cvtugP/6dY9/D9+M+zRpu
tH9lNhv0PQX+X2HZaLtU9WJT3oM5JaNZOeZklowWtQmOYOonfPn05AsvJJTvrQZrwzE+31tN
8qFYNvUTYdH822OTf3sU5t+rCY92coCkHCyWCh7LHHRdJqlrEZYqPQYd7CEoaQ88lqgc5LEp
+9F68DObNhk81BDcb4LZPrCF46GIPNPAWiyWt8lqUpfOBvECuRkDUP8LgbXpGa/PENFne4z6
5LF4/+Lrfx6FdYIQ4dFODpCUg8VSVf+z03WZpK5FWKr02O5gD+2S9sBjxeNft+7cE+Vf24h/
3S3wr20C/2L1hP1r2iD7VwdYG4jx+uwg+twXoz55rMH0rw7Co50cICkHi6XKv+x0XSapaxGW
Kj3uc7CHfZL2wGOp8K97iX89LvCvewX+xeoJ+9f0QfavTrA26uL12Un02R2jPnmswfSvTsKj
nRwgKQeLpcq/7HRdJqlrEZYqPXY72EO3pD3wWCr8az/xrxcE/rVf4F+snqpJe9lg+lcPWJte
8frsIfrsjVGfPNZg+lcP4dFODpCUg8VS5V92ui6T1LUIS5Ueex3soVfSHngsFf71O+Jf7wr8
63cC/2L1hP1r5iD711GwNt7i9XmU6DOWDdhEWIPpX0eJbu3kAEk5WCxV/mWn6zJJXYuwVOkR
f9/OHvAzGXvgsVT413HiXx6tr38dF/gXqyfsX7MG2b/SNWuTKl6f6USfxTHqk8caTP9KJzza
yQGScrBYqvzLTtdlkroWYanSY7GDPRRL2gOPpcK/ssj4ovME/pWl9fUvVk/Yv2YPsn+VkO+L
Ng8rIfosjVGfPNZg+lcJ4dFODpCUg8VS5V92ui6T1LUIS5UeFzjYQ6xYQ22wVPjXBcS/SgX+
dYHAv1g9Yf+aI/Av+k06Hu6QJh4/119fWSK+SL/5Y685Ri4R3YuwBssXD5H4USUHjyVjQ4Ml
88NedXEnwkrUb5x46PRYi5xRv+HtB/uNTmye/SY7l+QDh7kkqdBnnzXfPHu492mf/e9JvDz/
FMVLrM9+c56/2qi/xtFnz47j7erqUrq57CEy1hrHfbkC/+Wx+I1ReZ/0KvRJVXKIsGQ2Rs2A
6HHXbH6icrwFnaeH+VytIO54LD7u+PEWXkXjBNhvVyiUo0LhWAaMu0qhrnmsRDYbHqh4edir
zr5EWLI+5TSWo788b74gz2P5scvzRPP5VKW7q8n3Qwrsicca6E29B8rm8JyUZkV6EWElo8x7
vVb8tSQoswhLdlPvs72Rd43mLHcXuvkGup3M+HMX8YEHvOY4sX8DPG+2Hq5FXj0dLjVmNLcg
a6hD5dL1EED361D5tMmYYaTDZcYm31UwFV3XIpqQMfsZv7McroJpMBtdB2EDrED3VZF5udlg
zT3KBWtTcDw3KZN55udo2XfpPKZ8sOY15XD0Gcx1JvOdHIaWxfMTfujzeDYjV53WhYhNdihI
63isgU7rPn/jFVu/x88S0Uu7Qr3wWInI/OHO3bYy42eJlClU2YIIS0ZmVbbdQXjoVBCHPFYq
2/Y+hXrhsZLVtlXZgghLVT5O23G8MPBzL9a++oDRLsKvmcGvFUIv7dYAefhq2g7jHGhb9Pg1
lxtreuyd/prxnfPRNX7/1ez/MvCrn3440n6Ez5gePx8K5l4L+sOHzfaKMRbfaf9lTWqLtOOc
R9pxqjKN9h6NkYdvx/Fy5SM2DgcvTsLhtcOOGjr5l6a5UeuirP2FqRP+nkaP/zs0jszn5eeb
70/P938H31P/+tn+Ne2/Pm79TuWoHXfD/fhs/e6PwpvxdRNvWa6/hurN8AlyPz3/Owb/2Db8
3/FDG5jzauzi5I9z/vf41IgTQyf34OsMzp4p73sPmXGx/zLTD6if0HZLr40/UP+hgc5Ronj4
u5gLqkvKB/sePlP6FQ/OuJ/1QwpN36Pne7g4ARInb5J0INY48SZQj2iH/usR95CyM1uP6CD1
CJzn4DXP2FrAykgtIBzOYcrZbBk8h/CRyzx34tWu/jRBoIOBLqd3kjynR0GezWOlclmmW6Fe
eKxkLcuosgURVqq1SayNIS15gsjApiWdJC3pJjhbIQhTEIKPqfsnQ/28h8TPUQX2zWOlst/3
KtQLj5Wsfq/KFkRYqViHoeXToRBd/qXfW6tH1234UMPdn8060ReCdQ1p2exbb05KpfLyD9k6
xw6rzvFDvs5B6ig/jK/O8cOI7v0/NOscot8p/d7v0jUA/FE4dK3dHHK+i4tjuzrMvLdSKk4e
cKrDvPmM2joMxcPf5eowD/B1GPb7DnWYB0gdxjgfSYI6zAMxlDuOELtiyx09pNyB85wN6LgE
mqARQiiWm1Acs70Z4TC7jh3d2RJfs2urpWp95ijJf9K1xPNvHiuVyzV4roEqvfBYyVquUWUL
Iqyz0e+QTvReoiAOeaxUtu1ihXrhsZLVtlXZggjrbNh2CeGhUkEc8lipbNsLFOqFx0pW21Zl
CyKsVGuH2hxDeRCvg57BlQex3Lg8iOP8KsBzJKag42KYDXOixpqwRzztUrGOnUtk7gSe31HO
jHtjbYI++7kW2/qaIqzBGrPMfrvCQY5ySTlUrt+KcVc56HqVpK55rGQdg2hnX/GMQSyPQ+aB
GndK15Gl46j4+FxN4jMYY3zyWKmat2JZgg56CUrqhcdKVjun8deiwM55rFTLW/eCOd8djy39
BTqauLimz3KZvHUW8YEDxDY2AF3PvsEYZVoFjUar2g1wo7GHwBCIXsc+mxs3yq5v70swL1ad
boSYMWq8f4SIf7TH6B88ViqnG+0OemmX1AuPlYwyH9TsbSGedCOUgMyqbLuDGbPAx2EHicN9
McYhj5XKtr3PQS/7JPXCYyWrbdvZQjy23RGHzMmUJ95E8jg8TuqfAe8v2jdPvIfEEZsndpA8
Ecf5t0j/A55jsQnlhzosMvJQNq/LZ8ZD5CRJftfJjGfgbb+T2H53jLbPY6VymtDtoJduSb3w
WMmaJtjZQjxpQmccMifbWCjs43i803LA++z1TRP4sVCziA8c0PixUGY5N1nGQtG1G2l/H2/f
PcS+e2O0bx4rlf2+10EvvZJ64bGS1e/tbCEev++JQ+ZkLAscIWWBPwv8/oigLNBD/L5XWBao
SomywFGmn5S3/aPE9mNZ50+ElcppApbZTi/4mYxeeKxkTRPsbCGeNIHHOht133TN6ifl4zCd
xGFxjHHIY6WybRc76KVYUi88VrLatp0txGPb6XHILMrXNJvxZVqM14nsb4rzL7yP7W/ReazW
N7/Dz/K4/A7LfYDYRrz7yGYx4+4ywJr3n8m0CWdK5I2q04wSEreVAt8oIb5RGqNv8FipnGYs
sNGLrP+IsJI1zShRJLMIK940w5ME5eV2kh7g8Rh7oK8/0GfZXPpRQtIPHP94/qFO/qrRsdXo
TWpBaYe1LkgGU1bOgOh9kP2KxnKw1zi9KiT0+eTaZ+ykfGXj5tr65sA1ekgPBYIhvalOX1J/
rT79Un1lS3Nd7fqAvq6hKRTUL2toqZqq19aFAs36yuVXTZutBzesWF6FuMXrb65AEbwszbId
8LTZrgv4VQzWXtRtUG7EQAGEUQxocIpo7KCxNg7dA5sNBeTgQ4WRalALn2e8j23nUsG4fzYs
Js+zdFw7HCvxhuowH0YZ/rqISXUuYa73wlLiz/hYxKVNfLikn+cLIIOM/R8Fx4DKTmcDeEgq
lcaMoqcj632MVw4hXos9Ko94UwGJg2HEs4YTDx1JvBOn2qOIR+PVUvFKhZXG2mVe8mXDPDIK
I/zrhLOFBn5N7bqWhtpmvTkQbGkIBZl3IyHLxMDveiLvGqhiYo8MsVeGOE2GOF2GOEOGOLM/
YrptvI6iLItkH1lRal8cDNVvqg3VNzXq1SgNtPmQT/whvy4i9nPE2boDcbYM8RAZ4hwZ4lwZ
4jwZ4nwZ4gIZ4qEyxMNkiAtliIfLEI+QIR4pQ1wkQ3yODPEoGeLRMsTnyhCPERMvgaUogcnI
SgM91y2DuMENX5aggXjuabwl0TWo2LLGKPXFQv3xjmQ9U52sISXZNeSeFJ12xHtgjFcMpO9H
5hj/xMgLNSsVNg789KdwMxM/uIB0BoHgDLxa31rb0BLQJ5i1zYkJG8K27voDO3PaKrH4Z8JQ
cDP53WJB41gI6c24TKfOFo9WVb3WuzJvocmCJmDBw7GwQg9uaalFlW5VLHS27/ZNhF6iBY+A
BS/HwqX1dXWB5kAjrt8HQtsCgUZ9U6C2MRg3C8/9FIpe+tGiLpMFr4CFNI6FZU3bAs36+qbG
uvprDEYa6jfVhxLQwrJDCyavqVpOWEgTsJDOsXDl5s1qWYAr/XmnT5QSFtIFLGRwLCxRbY5s
knAmnCFgIdPOKZcockqWlTPhzAgLj0baONi2IcoCm7aD1Bse6Te80m+4XLlcuVy5XLlcuVy5
XLlcuVy5XH1VuMrRbyM9WT6m4wRfjyM9YHjPxqXkXmP6rfGYBrO3eCXuLda3BqfolzQ1hpqb
Gsz+4x3Z6Vq6puWkW4tW0yq9xtSYqMRvLZzb5jF6494xZHqrTb4Xe1rMvdia24st7MXWIr3Y
HyPl+GPqxf6YVDb79mLT9iSrB3tJPy15l/XpwY71DfU92KZn7TXavmhPtdu77PYuc73L493e
Zbd32e1ddnuX3eAGN7i9y27vsqh3WVw3FcWPc22WDx7pN7zSb7hcuVy5XLlcuVy5XLlcuVy5
XLlcfVW4snqI/IPQQ3Rw/YKb561qFfYQzV34FukhWgv/vht9b3e0Np7W2Nl4MGj9O/iTDcw9
nW1Nww2jEW9DAfTFVyzB1JhvvFVSGofTlol0iX6cSVZqi2qreiYNXvhXT2TmeAHpUaC9DPmM
/NncPZ1RWgTRM2aHgzWD1w/RM1LHgrVLEqtbdsY6OxsYz5i9xkEH9P1iOMFKXCm+Fgf2e1QP
rDwqVzWntnOIrBgtmkmNZZwL/c+qF2HRGeFURfyq5hqoWTH8IPmAkxwyM8J5LNGMcEwmmgXP
xpVo9zj8+0cOu2JdASuNPV9roRGCxlXA2CerDmLfFevNR6N3dUvrY2X55H9zv9ovCj6K7CyW
/1E+7Mp+39r97X1r97cTQx4cgc9PkB2qaXxaqO1RaRJ9uCu72AAcUmXujEbvea6OT6n4Pkv/
/LOTjF3BaKC7Yr1Mvs/vZoff43fF0hjdewS6b9dc3Q+U7tmV5Ncx8VHAXH+NSZPTmfQ6jbvG
PeSFBKtmeXV1Bnr561jfYHbY5ZG8eTxzT0MROarBXOWiDazdVXfBR5HnExharc8+eX3aUiEz
HC7Kiz5XkjOgcyU50/s8dC4oQ8eOcDgLv4/ORZXkHD72GOzoQrhIoG+j85w2U74DXjn58OoO
IXQsJAbwHNxuI19WH5kqOfnefXI+vHdgHjrmw9sHl8A7T86D9w8thd6nq+Ddp+ahowKOP1sF
76Hr47+8Ak79YTv8redaeAfd9z6zCD74dTWivxzCr98O4f/eDX89vB7+9uIG+PvvtyBsRPP0
IvjkyEb4+8vN8NsfBaCy5iR88mI9nHntNoQ9Hx5pb4OFNZ+g4yR89p8t8P7BxfDh4RCcOX0S
/vT2F/DQo5/Db547DR921cDx/7gWTn/6PpxAfP718Dp4/zdXw6m/vA7/89w/wRtPVsPPHn8J
duz5DP747HZ4/vn34MAvT8FjT52C+/Z+DmdOnUTynoHul06DhsO4vgH/PHZcaWnprIrS0vJZ
5KJinEmPjkmlmjZxErkoJfTi3zWMM6m8tHTuJHJRQegncWFWnPh29Hb4EydOnDR34sQFk8hF
uTP++fOmTJs5Z37072namJILL5o6Y/acKLn8Pp+vePzki6fPmMl+t8w3tChXLywsvHjqtCgc
X8HIQhwmXzQlGt/vuwD/Pv7CCVG/p406D/+sF5ecz8bXOaNGFxYOP7cw1zdGG8v8acNyC4eP
8I0s8mlRIXtITm5eVn7BUF9a9IMMLTPLp/l8fo0LHi+mTOd+5dMpvFqTaJcNDdiVT7oiZdGp
JB3E5ZAxkNhKUvsJ1mzN7DFmyz70WR5XTmLLSvGuJJXJ/JYB1oihdPKbn1w7yYDzhYUkvca0
OlMvy3eoD9F7m1V5ovQ8huh5ZoJ6foZgTUUvzOD0TJ/1p2dzB4cWVMeqRZrWDW0HjfuQscsD
1Ru7k4Of0282RK/EQ8exDaSeWdueAH133lRdZ8GhHKydYPiyPn5WBrHtDiTCGqw6C/225iAH
SMrBYqngscxB12WSuhZhqdQjxq1wsIdySXuoUMzjKgebXSVpszyWTP2Ut29+px/WvhPZ6ScZ
ZG5G571ppryVzPfofVGk/Ses9ddeQ6tMOK3GafxeUrnLJ+nkBLCuNZSKesWVP4xE/32pwvr1
61sDgUD4uuuuC2/cuFF44OdOGHV1da1btmwJb9u2LXz99df3OZqamvpVG/p+a0tLS3j79u3h
m266KeoIBoMxqb2xsbH1xhtvDLe1tYVvueWWyIF5iFUfiIdW/P6uXbvCu3fvNo7W1lapaEcy
tOL377zzzvBdd90VvvXWW6XNBvHdit/t6OgI33HHHXGZ3c6dO1vb29vDe/bsidts0bdbE3kf
B/R+65fJZ9g2wQ8c2gSrjFaoWiPtmX7xCKNdJo1pl4+lXYoP1Tuj77s2zhvzWlSTx8eF+H7y
nKYfmDvXm/c0bX+Z0PM4Tx2bfj9L/9mlD+EmGnhEu3skvn+9yH+FSfmO8Tz7WRM/1yh9Iv8l
OCdu323QH//Ose/h+3GfZg032r8ymw36ngL/r7BstF2qerEp78GcktGsHHMyS0aL2gRHMPUT
vnx68oUXEsr3VoO14xif760m+VAsu/qJsGj+7bHJvz0K8+/VhEc7OUBSDhZLBY9lDrouk9S1
CEuVHoMO9hCUtAceS1QO8tiU/Wg9+JlNmwweagjuN8FsH9jC8VBEnmlgrRbL22Q1qUtng3iF
3IwBqP+FwNr1jNdniOizPUZ98li8f/H1P4/COkGI8GgnB0jKwWKpqv/Z6bpMUtciLFV6bHew
h3ZJe+Cx4vGvW3fuifKvbcS/7hb41zaBf7F6wv41bZD9qwOsHcR4fXYQfe6LUZ881mD6Vwfh
0U4OkJSDxVLlX3a6LpPUtQhLlR73OdjDPkl74LFU+Ne9xL8eF/jXvQL/YvWE/Wv6IPtXJ1g7
dfH67CT67I5RnzzWYPpXJ+HRTg6QlIPFUuVfdrouk9S1CEuVHrsd7KFb0h54LBX+tZ/41wsC
/9ov8C9WT9WkvWww/asHrF2veH32EH32xqhPHmsw/auH8GgnB0jKwWKp8i87XZdJ6lqEpUqP
vQ720CtpDzyWCv/6HfGvdwX+9TuBf7F6wv41c5D96yhYO2/x+jxK9BnLDmwirMH0r6NEt3Zy
gKQcLJYq/7LTdZmkrkVYqvSIv29nD/iZjD3wWCr86zjxL4/W17+OC/yL1RP2r1mD7F/pmrVL
Fa/PdKLP4hj1yWMNpn+lEx7t5ABJOVgsVf5lp+sySV2LsFTpsdjBHool7YHHUuFfWWR80XkC
/8rS+voXqyfsX7MH2b9KyPdFu4eVEH2WxqhPHmsw/auE8GgnB0jKwWKp8i87XZdJ6lqEpUqP
CxzsIVasoTZYKvzrAuJfpQL/ukDgX6yesH/NEfgX/SYdD3dIE4+f66+vLBFfpN/8sdccI5eI
7kVYg+WLh0j8qJKDx5KxocGS+WGvurgTYSXqN048dHqsRc6o3/D2g/1GJzbPfpOdS/KBw1yS
VOizz5pvnj3c+7TP/vckXp5/iuIl1me/Oc9fbdRf4+izZ8fxdnV1Kd1d9hAZa43jvlyB//JY
/M6ovE96FfqkKjlEWDI7o2ZA9LhrNj9ROd6CztPDfK5WEHc8Fh93/HgLr6JxAuy3KxTKUaFw
LAPGXaVQ1zxWIrsND1S8POxVZ18iLFmfchrL0V+eN1+Q57H82OV5ovl8qtLd1eT7IQX2xGMN
9K7eA2VzeE5KsyK9iLCSUea9Xiv+WhKUWYQlu6v32d7Ju0ZzlrsL3XwD3U5m/LmL+MADXnOc
2L8BnjdbD9cir54OlxozmluQNdShcul6CKD7dah82mTMMNLhMmOX7yqYhq5rEU3ImP2M31kO
V6FfZ6PrIGyAFei+KjIvNxusuUe5YO0KjucmZTLP/Bwt+y6dx5QP1rymHI4+g7nOZL6Tw9Cy
eH7CD30ez27kqtO6ELHJDgVpHY810Gnd52+8Yuv3+FkiemlXqBceKxGZP9y521Zm/CyRMoUq
WxBhycisyrY7CA+dCuKQx0pl296nUC88VrLatipbEGGpysdpO44XBn7uxdpXHzDaRfg1M/i1
Quil3RogD19N22GcA22LHr/mcmNNj73TXzO+Mw9d4/dfzc4z8KuffjjSfoTPmB4/HwrmXgv6
w4fN9ooxFt9pedaktkg7znnm8z8uftX4jsbIw7fjeLnyERuHgxcn4fDe844avP5L09yodVH2
/h9TJ/w9jR7/X2gcmc/LzzffXz3M/xd8T/3rZ/vXtP/6uPU7laN23A33G2PoI7/7o/BmfN3E
W5brr6F6M3yC3K8e9heDf2wb/r/44REw59XYxcmE//pDisSJoZO/4usMzp4p7zQu9l9m+gH1
E9pu6bXxB+o/NNA5ShQPfxdzQXVJ+WDfw2dKv+LBGfezfkih6Xv0fA8XJ0Di5E2SDsQaJ94E
6hHt0H894h5SdmbrER2kHoHzHLzmGVsLWBmpBVi7vfBl8BzCRy7z3IlXu/rTBIEOBrqc3kny
nB4FeTaPlcplmW6FeuGxkrUso8oWRFip1iaxNoa05AkiA5uWdJK0pJvgbIUgTAFr56iMJKmf
95D4OarAvnmsVPb7XoV64bGS1e9V2YIIKxXrMLR8OhSiy7/0e2v16LoNH2q4+7NZJ/pCsK4h
LZs98MakVCovn2LrHDusOscpvs5B6iin4qtznIro3n/KrHOIfqf0e79L1wDwR+HQtXZzyPku
Lo7t6jDz3kqpODl9luowp7k6zGm+DsN+36EOc5rUYYzzkSSowzwQQ7njCLErttzRQ8odOM/Z
gI5LoAkaIYRiuQnFMdubEb2OHd3ZEl+za6ulan3mKMl/0rXE828eK5XLNXiugSq98FjJWq5R
ZQsirLPR75BO9F6iIA55rFS27WKFeuGxktW2VdmCCOts2HYJ4aFSQRzyWKls2wsU6oXHSlbb
VmULIqxUa4faHEN5EK+DnsGVB7HcuDyI4/wqwHMkpqDjYpgNM6LGmrBHPO1SsY6dS2TuBJ7f
Uc6Me2Ntgj77uRbb+poirMEas8x+u8JBjnJJOVSu34pxVznoepWkrnmsZB2DaGdf8YxBLI9D
5oEad0rXkaXjqPj4XE3iMxhjfPJYqZq3YlmCDnoJSuqFx0pWO6fx16LAznmsVMtb94I53x2P
Lf0FOpq4uKbPcpm8dRbxgQPENjYAXc++wRhlWgWNRqvaDXCjsYfAEIhexz6bGzfKrm/vSzAv
Vp1uhJgxarx/hIh/tMfoHzxWKqcb7Q56aZfUC4+VjDIf1OxtIZ50I5SAzKpsu4MZs8DHYQeJ
w30xxiGPlcq2vc9BL/sk9cJjJatt29lCPLbdEYfMyZQn3kTyODxO6p8B7y/aN0+8h8QRmyd2
kDwRx/m3SP8DnmOxCeWHOiwy8lA2r8tnxkPkJEl+18mMZ+Btv5PYfneMts9jpXKa0O2gl25J
vfBYyZom2NlCPGlCZxwyJ9tYKOzjeLzTcsD77PVNE/ixULOIDxzQknssFF27kfb38fbdQ+y7
N0b75rFS2e97HfTSK6kXHitZ/d7OFuLx+544ZE7GssARUhb4s8DvjwjKAj3E73uFZYGqlCgL
HGX6SXnbP0psP5Z1/kRYqZwmYJnt9IKfyeiFx0rWNMHOFuJJE3iss1H3TdesflI+DtNJHBbH
GIc8VirbdrGDXool9cJjJatt29lCPLadHofMonxNsxlfpsV4ncj+pjj/wvvY/hadx2p98zv8
LI/L77DcB4htxLuPbBYz7i4DrHn/mUybcKZE3qg6zSghcVsp8I0S4hulMfoGj5XKacYCG73I
+o8IK1nTjBJFMouw4k0zPElQXm4n6QEej7EH+voDfZbNpR8lJP3A8Y/nH+rkrxodW43epBaU
dljrgmQwZeUMiN4H2a9oLAd7jdOrQkKfT659xk7KVzZurq1vDlyjh/RQIBjSm+r0JfXX6tMv
1Ve2NNfVrg/o6xqaQkH9soaWqml6bV0o0KyvXH7VtNl6cMOK5VWIW7z+5goUwcvSLNsBT5vt
uoBfxWDtRd0G5UYMFEAY6U6DU0RjB421cege2GwoIAcfKoxUAwMPBzxbfjKxnSWCcf9suIw8
z9Jx7XCsxBuqw3wYZfjr15hUZxlzvReWEn/Gx9e4tIkPy/p5vgAyyNj/0XAMqOx0NoCHpFJp
zCh6OrLex3jlELBmEecRbyogqcww4lnDiYeOJN6JU+1RxKPxaql4pcJKY+0yL/myYR4ZhRH+
dcLZQgO/pnZdS0Nts94cCLY0hILMu5GQZWLgdz2Rdw1UMbFHhtgrQ5wmQ5wuQ5whQ5zZHzHd
Nl5HUYYjeTyJbEvti4Oh+k21ofqmRr0apYE2H/KJP+TXRcR+jjhbdyDOliEeIkOcI0OcK0Oc
J0OcL0NcIEM8VIZ4mAxxoQzxcBniETLEI2WIi2SIz5EhHiVDPFqG+FwZ4jFi4iWwFCUwGVlp
oOe6ZRA3uOHLEjQQzz2NtyS6BhVb1hilvlioP96RrGeqkzWkJLuG3JOi0454D4zxioH0/cgc
458YeaFmpcLGgZ/+FG5m4geXec4gEJyBV+tbaxtaAvoEs7Y5MWFDOLh+wc3zVrVWYvHPhKHg
ZvK7xYLGsRDSm3GZTp0tfvzGg78/fTBvocmCJmDBw7GwQg9uaalFlW5VLOQ9/9If6yf2Ei14
BCx4ORYura+rCzQHGnH9PhDaFgg06psCtY3BuFnw5D78D1dkVHeZLHgFLKRxLCxr2hZo1tc3
NdbVX2Mw0lC/qT6UgBa++8cLc3/1/jcIC2kCFtI5Fq7cvFktC0/n1J+79c45hIV0AQsZHAtL
VJsjmyScCWcIWMi0c8olipySZeVMODPCwqORNg62bYiywKbtIPWGR/oNr/QbLlcuVy5XLlcu
Vy5XLlcuVy5XLldfFa5y9NtIT5af6TjBHR/jSA8Y3rNxKbnXmH5rPKbB7C1eiXuL9a3BKfol
TY2h5qYGs/94R3a6lq5pOenWotW0Sq8xNSYq8VsL57Z5jJ64dwyZ3mrzGb2Xdr3Yi7le7Jpm
VMdFFd/m+saY+7I1ty9b2JetRfqyP0bKyY6pL/tjUuXs25dNW5Wsfuyl/bTnXd6nHzvWN9T3
Y5v+tddoAaP91W4fs9vHzPUxX+j2Mbt9zG4fs9vH7AY3uMHtY3b7mEV9zOIaqih+nOu0ffoo
pd/wSr/hcuVy5XLlcuVy5XLlcuVy5XLlcvVV4crqJ8qOu58oGHM/0bHFb7wWvPFtYT/R3IVv
kX6itfDybvTN3dHaeFpj5+TBoPXv4E82MPd0zjUNN4xGvA0F0BdfsQRTY77xhklpHE5bJtIl
+nEmWa8tqq3qmTR44V89kfnjBaRHgfYy5DPyZ3P3dF5pEUTPmx0O1jxeP0TPSx0L1l5JrG7Z
eevsnGA8T+8aBx3Q94vhBCtxpfhaHNjvUT2w8qhc25zaziGybrRoPjWWcS70P7dehEXnhVMV
8Wuba6Bm3fCD5ANOcsjMC+exRPPCMZloLjwbV6I95PDvHznsjXUFrDR2fq2FRggaVwFjt6w6
iH1vLP3x6L3d0vpYWT7539y19ouC7Mj+YvnZ+fD5sB5rD7geaw+4E0MeHIHPT5B9qml8Wqjt
UWkSffj5sGIDcEiVuT8avee5Oj6l4vss/fPPTjL2BqOB7o31Mvk+v6cdfo/fG0tjdO8R6L5d
c3U/ULpn15Nfx8RHAXP9NSZNTmfS6zTuGo+VKCRYNcurqzPQy19H12+C2WGXR/Lm8cw9DUXk
qAZzrYs2sPZY3QUfRZ5PYGi1Prvl9WlLhcxwuCgv+lxJzoDOleRM7/PQuaAMHTvC4Sz8PjoX
VZJz+NhjsKML4SKBvo3Oc9pM+Q545eTDazyE0LGQGMBzcLuNfFl9ZKrk5Hv3yfnw3oF56JgP
bx9cAu88OQ/eP7QUep+ugnefmoeOCjj+bBW8h66P//IKOPWH7fC3nmvhHXTf+8wi+ODX1Yj+
cgi/fjuE/3s3/PXwevjbixvg77/fgrARzdOL4JMjG+HvLzfDb38UgMqak/DJi/Vw5rXbEPZ8
eKS9DRbWfIKOk/DZf7bA+wcXw4eHQ3Dm9En409tfwEOPfg6/ee40fNhVA8f/41o4/en7cALx
+dfD6+D931wNp/7yOvzPc/8EbzxZDT97/CXYsecz+OOz2+H559+DA788BY89dQru2/s5nDl1
Esl7BrpfOg0aDuP6Bvzz2HGlpaWzKkpLy2eRi4pxJj06JpVq2sRJ5KKU0It/1zDOpPLS0rmT
yEUFoZ/EhVlx4tvR2+FPnDhx0tyJExdMIhflzvjnz5sybeac+dG/p2ljSi68aOqM2XOi5PL7
fL7i8ZMvnj5jJvvdMt/Qoly9sLDw4qnTonB8BSMLcZh80ZRofL/vAvz7+AsnRP2eNuo8/LNe
XHI+G1/njBpdWDj83MJc3xhtLPOnDcstHD7CN7LIp0WF7CE5uXlZ+QVDfWnRDzK0zCyf5vP5
NS54vJgynfuVT6fwmk2ivTY0YNc/6YqURaeSdBCXQ8ZAYutJ7SdYszWzx5gt+9BneVw5iS0r
xbueVCbzWwZYI4bSyW9+cu0kA84XFpL0GtPqTL0s36E+RO9t1uaJ0vMYoueZCer5GYI1Fb0w
g9Mzfdafns19HFpQHasWaVo3tB007kPGXg9Ub+x+Dn5Ov9kQvR4PHcc2kHpmbXsC9N1/U3Wd
BYdysPaD4cv6+FkZxLZHkAhrsOos9NuagxwgKQeLpYLHMgddl0nqWoSlUo8Yt8LBHsol7aFC
MY+rHGx2laTN8lgy9VPevvn9flj7TmS/n2SQuRmd96aZ8lYy36P3RZH2n7DWX3sNrTLhtBqn
8XtJ5S6fpJMTwLrWUCrqFVf+MBL996UK69evbw0EAuHrrrsuvHHjRuGBnzth1NXVtW7ZsiW8
bdu28PXXX9/naGpq6ldt6PutLS0t4e3bt4dvuummqCMYDMak9sbGxtYbb7wx3NbWFr7lllsi
B+YhVn0gHlrx+7t27Qrv3r3bOFpbW6WiHcnQit+/8847w3fddVf41ltvlTYbxHcrfrejoyN8
xx13xGV2O3fubG1vbw/v2bMnbrNF325N5H0c0PutXyafYdsEP3BoE6wyWqFqjbRn+sUjjHaZ
NKZdPpZ2KT5U74y+79o4b8xrUU0eHxfi+8lzmn5g7l9v3tO0/WVCz+M8dWz6/Sz9Z5c+hJto
4BHt7pH4/vUi/xUm5TvG8+xnTfxco/SJ/JfgnLh9t0F//DvHvofvx32aNdxo/8psNuh7Cvy/
wrLRdqnqxaa8B3NKRrNyzMksGS1qExzB1E/48unJF15IKN9bDda+Y3y+t5rkQ7Hs7SfCovm3
xyb/9ijMv1cTHu3kAEk5WCwVPJY56LpMUtciLFV6DDrYQ1DSHngsUTnIY1P2o/XgZzZtMnio
IbjfBLN9YAvHQxF5poG1Zixvk9WkLp0N4nVyMwag/hcCa+8zXp8hos/2GPXJY/H+xdf/PArr
BCHCo50cICkHi6Wq/men6zJJXYuwVOmx3cEe2iXtgceKx79u3bknyr+2Ef+6W+Bf2wT+xeoJ
+9e0QfavDrD2EeP12UH0uS9GffJYg+lfHYRHOzlAUg4WS5V/2em6TFLXIixVetznYA/7JO2B
x1LhX/cS/3pc4F/3CvyL1RP2r+mD7F+dYO3Xxeuzk+izO0Z98liD6V+dhEc7OUBSDhZLlX/Z
6bpMUtciLFV67Hawh25Je+CxVPjXfuJfLwj8a7/Av1g9VZP2ssH0rx6w9r7i9dlD9Nkboz55
rMH0rx7Co50cICkHi6XKv+x0XSapaxGWKj32OthDr6Q98Fgq/Ot3xL/eFfjX7wT+xeoJ+9fM
Qfavo2Dtv8Xr8yjRZyz7sImwBtO/jhLd2skBknKwWKr8y07XZZK6FmGp0iP+vp094Gcy9sBj
qfCv48S/PFpf/zou8C9WT9i/Zg2yf6Vr1l5VvD7TiT6LY9QnjzWY/pVOeLSTAyTlYLFU+Zed
rsskdS3CUqXHYgd7KJa0Bx5LhX9lkfFF5wn8K0vr61+snrB/zR5k/yoh3xftIVZC9Fkaoz55
rMH0rxLCo50cICkHi6XKv+x0XSapaxGWKj0ucLCHWLGG2mCp8K8LiH+VCvzrAoF/sXrC/jVH
4F/0m3Q83CFNPH6uv76yRHyRfvMdrzlGLhHdi7AGyxcPkfhRJQePJWNDgyXzn73q4k6Elajf
OPHwksda5Iz6DW8/2G90YvPsN9m5JB84zCVJhT77rPnm2cO9T/vsf0/i5fmnKF5iffab8/zV
Rv01jj57dhxvV1eX0j1mD5Gx1jjuyxX4L4/F74/K+6RXoU+qkkOEJbM/agZEj7tm8xOV4y3o
PD3M52oFccdj8XHHj7fwKhonwH67QqEcFQrHMmDcVQp1zWMlsufwQMXLn73q7EuEJetTTmM5
+svz5gvyPJYfuzxPNJ9PVbq7mnw/pMCeeKyB3tt7oGwOz0lpVqQXEVYyyvy214q/lgRlFmHJ
7u19tvfzvl5zlrsL3XyDjA2h/txFfOANrzlO7AnA82br4Vrk1dNhsTGjuQVZQx0ql66HALpf
h8qnTcYMIx19tZnMfK4z5j3j8msj+r0W3YeMX/D7y+Eq9M3Z6DoIG2AFuq+KzNHNBmseEt0f
HJ/xPKVM5pmfo2XfpXOahpB3KL2foc8kRxr3ewZHQ79Pj2zuO/jIZZ7Hs2+56vQwROy2Q0F6
yGMNdHr4+Ruv2KYN+FkiemlXqBceKxGZP9y521Zm/CyRcocqWxBhycisyrY7CA+dCuKQx0pl
296nUC88VrLatipbEGGpyutpW48XBn5+xtpXHzDaTvh1Nfj1ROil3TohD19N22qcA22vHr/m
cmPdjxM/KtHx+/+IrvH7r2bXG/htuUci38dnTI+fDwVzPwb94cNmm8YYi++0emviW6St5zzz
+R8rM402IY2Rh2/r8XJlKDYOBzNO2o/3GrL/S9PcqLVT1paaOuHvafT4i2gcmc/Lzzffn55v
PqH+9bP9a9p/fdz6nYbacTfcj8/W7/4ovBlfN/GW5fprqN4MnyD30/OL8AxDwzb8RX5oA3Pu
jV2cTPivP4xPlThBOsFJkFGGYwPlfe8EMy72X2b6AfUT2rbptfEH6j800HlMFI9+l+qS3rPv
4TOlX/HgjPtZP6TQ9D16voeLEyBx8iZJB2KNE28CdY126L+ucQ8pO7N1jQ5S18B5Dl4XTVw7
sHaE4cvgdMeYXOa5E692dawJAh0MdDm9k+Q5PQrybB4rlcsy3Qr1wmMla1lGlS2IsFKt3WJt
DGnJE0QGNi3pJGlJN8HZilKQKWDtLpWRJPXzHhI/RxXYN4+Vyn7fq1AvPFay+r0qWxBhpWId
hpZPh0J0+Zd+b60eXbfhQw13fzbrRF8I1j6kZbN5Hz1wUQqVl4vZOscOq85RzNc5SB2lOL46
R3FE9/5is84h+p3S7/0uXSfAH4VDK0I55HwXF8d2dZhvfZhScVLiWIcZr7gOMz5Shynh6jAl
ovcovUMdpoQ9H0mCOswDMZQ7jhC7YssdPaTcgfOcDei4BJqgEUIolptQHEfXY9i17ujul/g6
/UtQnzlK8p90LfH8m8dK5XINno+gSi88VrKWa1TZggjrbPQ7pBO9lyiIQx4rlW27WKFeeKxk
tW1VtiDCOhu2XUJ4qFQQhzxWKtv2AoV64bGS1bZV2YIIK9XaoTbHUB7Ea6VncOVBLDcuD+I4
vwrwPIopMBNmo78ZUe3W7BFPu1Ss4+sSmV+B54CUM2PjWJugz36uxbYGpwhrsMY1s9+ucJCj
XFIOlWu8YtxVDrpeJalrHitZxyna2Vc84xTL45B5oMam0rVm6TgqPj5Xk/gMxhifPFaq5q1Y
lqCDXoKSeuGxktXOafy1KLBzHivV8ta9YM6Jx+NPf4GOJi6u6bNcJm+dRXzgALGNDUDXvG8w
RqJWQaPRqnYD3GjsMzAEote6z+bGk7Jr4PsSzItVpxshZowa7x8h4h/tMfoHj5XK6Ua7g17a
JfXCYyWjzAc1e1uIJ90IJSCzKtvuYMYs8HHYQeJwX4xxyGOlsm3vc9DLPkm98FjJatt2thCP
bXfEIXMy5Yk3kTwOj5P6Z8B7kPbNE+8hccTmiR0kT8Rx/i3S/9CASgabjLkXi4w8lM3r8pnx
EDlJkt91MuMZeNvvJLbfHaPt81ipnCZ0O+ilW1IvPFaypgl2thBPmtAZh8zJNhYK+zge77Qc
8F58fdMEfizULOIDB7TkHgtF13ek/X28ffcQ++6N0b55rFT2+14HvfRK6oXHSla/t7OFePy+
Jw6Zk7EscISUBf4s8PsjgrJAD/H7XmFZoColygJHmX5S3vaPEtuPZS1AEVYqpwlYZju94Gcy
euGxkjVNsLOFeNIEHuts1H3TNauflI/DdBKHxTHGIY+VyrZd7KCXYkm98FjJatt2thCPbafH
IbMoX9NsxpdpMV4nsgcqzr/wXre/ReexWt/8Dj/L4/I7LPcBYhvx7jWbxYy7ywBr3n8m0yac
KZE3qk4zSkjcVgp8o4T4RmmMvsFjpXKascBGL7L+I8JK1jSjRJHMIqx40wxPEpSX20l6gMdj
7IG+/kCfZXPpRwlJP3D84/mHOvmrRsdWozepBaUd1rogGUxZOQOi90r2KxrLwV7j9KqQ0OeT
ax/gHcKvbNxcW98cuEYP6aFAMKQ31elL6q/Vpy/WV7Y019WuD+jrGppCQb2mubYxWBdobq5v
1GvrQoFmfeXyq6bN1oMbViyvQjzjlTpXoGhelmZZEHjabFcQ/CoGa9fqNig34qEAwiiuNThF
NHYQJoO1WzYbCsjBhwoj7dBIXM8z3scWtFQw+p8Nl5PnWTquI46VeEN1mA+jDK+dzKQ9FzHX
ew3OPOSYzKVQfLion+cLyFwHDc6FY0Blp3MCPCStSmPG0tPx9T7GN4eANZc4j/hUAUlrhhH/
Gk78dCTxUZx2jyJ+jddVxWsaVhqrnHnJlw3zyCiM8K8TzhYa+DW161oaapv15kCwpSEUZN6N
hCwTA7/ribxroIqJPTLEXhniNBnidBniDBnizP6I6QbzOooymglnRal9cTBUv6k2VN/UqFej
lNDmQz7xh/y6iNjPEWfrDsTZMsRDZIhzZIhzZYjzZIjzZYgLZIiHyhAPkyEulCEeLkM8QoZ4
pAxxkQzxOTLEo2SIR8sQnytDPEZMvASWogQmIysN9Fy3DOIGN3xZggbiGajxlkTXoGLLGqPU
Fwv1xzuS9Ux1soaUZNeQe1J02hHvgTFeMZC+H5lp/BMjL9SsVNg48NOfws1M/OBizBkEgjPw
an1rbUNLQJ9g1jknJmwIxxa/8VrwxrcrsfhnwlBwM/ndYkHjWAjpzbhMp84WMzJHZx1+lbKg
CVjwcCys0INbWmpR1VsVCzf8X7frB/7+OGHBI2DBy7FwaX0dqtIHGnEtPxDaFgg06psCqJ4f
NwtdxTWP/r/D/F0mC14BC2kcC8uatgWa9fVNjXX11xiMNNRvqg8loIVDGcdOjvvdxYSFNAEL
6RwLV27erJaFe05PPOfb3xm30GQhXcBCBsfCEtXmyCYJZ8IZAhYy7ZxyiSKnZFk5E86MsPBo
pI2DbRuiLLBpO0i94ZF+wyv9hsuVy5XLlcuVy5XLlcuVy5XLlcvVV4WrHP020pOVzXSc4I6P
caQHbA7pRRxHntHea9ypwvQW61uDU/RLmhpDzU0N5i87stO1dE3LSbeWrqZVeo2pMVGJ31o4
t81j9MK9Y8j0VpsPFjr0ZS/h+rKXrViyfFrMvdia24st7MXWIr3YHyPlDImpF/tjUtns24tN
25OsHux/6Kcl72t9erBjfUN9D7bpWXuNti/aU+32Lru9y1zv8gS3d9ntXXZ7l93eZTe4wQ1u
77LbuyzqXRbXTUXx41yb5YNH+g2v9BsuVy5XLlcuVy5XLlcuVy5XLlcuV18VrqweoiFx9xCt
jLmHaP/hwht2dS8S9hDNXfgW6SFaC/++G31vd7Q2ntbY2XgwaP07+JMNzD2dc03DDaMRb0MB
9MVXLMHUmO+w19rXh4a2TKRL9ONMsl5bVFvVM2nwwr96IvPHC0h80F6GfEb+bO6ezistguh5
s8PBmsfrh+h5qWPB2iuJ1S07b52dE4znzV7joAP6fjGcYCWuFF+LA/s9qgdWHpVrm1PbOUTW
jRbNp8YyzoX+59aLsOi8cKoifm1zDdSsG36QfMBJDpl54TyWaF44JhPNhWfjSrSHHP79I4e9
sa6AlaCjoxYaIWhcBYzdsuog9r2x9EPRe7ul9bGyfPK/uWvtFwXZkf3F8rPz4e5z/mTtAfcn
aw+4E0MeHIHPT5B9qml8WqjtUWkSfXj3OcUG4JAqc380es9zdXxKxfdZ+uefnWTsDUYD3Rvr
ZfJ9fk87/B6/N5bG6N4j0H275up+oHTPrie/jomPAub6a0yanM6k12ncNZ7xX0iwapZXV2eg
l7+Ort8Es8Muj+TN45l7GorIUQ3mWhdtYO2xugs+ijyfwNBqfXbL69OWCpnhcFFe9LmSnAGd
K8mZ3uehc0EZOnaEw1n4fXQuqiTn8LHHYEcXwkUCfRud57SZ8h3wysmH13gIoWMhMYDn4HYb
+bL6yFTJyffuk/PhvQPz0DEf3j64BN55ch68f2gp9D5dBe8+NQ8dFXD82Sp4D10f/+UVcOoP
2+FvPdfCO+i+95lF8MGvqxH95RB+/XYI//du+Ovh9fC3FzfA33+/BWEjmqcXwSdHNsLfX26G
3/4oAJU1J+GTF+vhzGu3Iez58Eh7Gyys+QQdJ+Gz/2yB9w8uhg8Ph+DM6ZPwp7e/gIce/Rx+
89xp+LCrBo7/x7Vw+tP34QTi86+H18H7v7kaTv3ldfif5/4J3niyGn72+EuwY89n8Mdnt8Pz
z78HB355Ch576hTct/dzOHPqJJL3DHS/dBo0HMb1DfjnseNKS0tnVZSWls8iFxXjTHp0TCrV
tImTyEUpoRf/rmGcSeWlpXMnkYsKQj+JC7PixLejt8OfOHHipLkTJy6YRC7KnfHPnzdl2sw5
86N/T9PGlFx40dQZs+dEyeX3+XzF4ydfPH3GTPa7Zb6hRbl6YWHhxVOnReH4CkYW4jD5oinR
+H7fBfj38RdOiPo9bdR5+Ge9uOR8Nr7OGTW6sHD4uYW5vjHaWOZPG5ZbOHyEb2SRT4sK2UNy
cvOy8guG+tKiH2RomVk+zefza1zweDFlOvcrn07hNZtEe21owK5/0hUpi04l6SAuh4yBxNaT
2k+wZmtmjzFb9qHP8rhyEltWinc9qUzmtwywRgylk9/85NpJBpwvLCTpNabVmXpZvkN9iN7b
rM0TpecxRM8zE9TzMwRrKnphBqdn+qw/PZv7OLSgOlYt0rRuaDto3IeMvR6o3tj9HPycfrMh
ej0eOo5tIPXM2vYE6Lv/puo6Cw7lYO0Hw5f18bMyiG2PIBHWYNVZ6Lc1BzlAUg4WSwWPZQ66
LpPUtQhLpR4xboWDPZRL2kOFYh5XOdjsKkmb5bFk6qe8ffP7/bD2nch+P8kgczM6700z5a1k
vkfviyLtP2Gtv/YaWmXCaTVO4/eSyl0+SScngHWtoVTUK678YST670sV1q9f3xoIBMLXXXdd
eOPGjcIDP3fCqKura92yZUt427Zt4euvv77P0dTU1K/a0PdbW1pawtu3bw/fdNNNUUcwGIxJ
7Y2Nja033nhjuK2tLXzLLbdEDsxDrPpAPLTi93ft2hXevXu3cbS2tkpFO5KhFb9/5513hu+6
667wrbfeKm02iO9W/G5HR0f4jjvuiMvsdu7c2dre3h7es2dP3GaLvt2ayPs4oPdbv0w+w7YJ
fuDQJlhltELVGmnP9ItHGO0yaUy7fCztUnyo3hl937Vx3pjXopo8Pi7E95PnNP3A3L/evKdp
+8uEnsd56tj0+1n6zy59CDfRwCPa3SPx/etF/itMyneM59nPmvi5RukT+S/BOXH7boP++HeO
fQ/fj/s0a7jR/pXZbND3FPh/hWWj7VLVi015D+aUjGblmJNZMlrUJjiCqZ/w5dOTL7yQUL63
Gqx9x/h8bzXJh2LZ20+ERfNvj03+7VGYf68mPNrJAZJysFgqeCxz0HWZpK5FWKr0GHSwh6Ck
PfBYonKQx6bsR+vBz2zaZPBQQ3C/CWb7wBaOhyLyTANrzVjeJqtJXTobxOvkZgxA/S8E1t5n
vD5DRJ/tMeqTx+L9i6//eRTWCUKERzs5QFIOFktV/c9O12WSuhZhqdJju4M9tEvaA48Vj3/d
unNPlH9tI/51t8C/tgn8i9UT9q9pg+xfHWDtI8brs4Poc1+M+uSxBtO/OgiPdnKApBwslir/
stN1maSuRViq9LjPwR72SdoDj6XCv+4l/vW4wL/uFfgXqyfsX9MH2b86wdqvi9dnJ9Fnd4z6
5LEG0786CY92coCkHCyWKv+y03WZpK5FWKr02O1gD92S9sBjqfCv/cS/XhD4136Bf7F6qibt
ZYPpXz1g7X3F67OH6LM3Rn3yWIPpXz2ERzs5QFIOFkuVf9npukxS1yIsVXrsdbCHXkl74LFU
+NfviH+9K/Cv3wn8i9UT9q+Zg+xfR8Haf4vX51Giz1j2YRNhDaZ/HSW6tZMDJOVgsVT5l52u
yyR1LcJSpUf8fTt7wM9k7IHHUuFfx4l/ebS+/nVc4F+snrB/zRpk/0rXrL2qeH2mE30Wx6hP
Hmsw/Sud8GgnB0jKwWKp8i87XZdJ6lqEpUqPxQ72UCxpDzyWCv/KIuOLzhP4V5bW179YPWH/
mj3I/lVCvi/aQ6yE6LM0Rn3yWIPpXyWERzs5QFIOFkuVf9npukxS1yIsVXpc4GAPsWINtcFS
4V8XEP8qFfjXBQL/YvWE/WuOwL/oN+l4uEOaePxcf31lifgi/eaPveYYuUR0L8IaLF88ROJH
lRw8lowNDZbMD3vVxZ0IK1G/ceKh02Mtckb9hrcf7Dc6sXn2m+xckg8c5pKkQp991nzz7OHe
p332vyfx8vxTFC+xPvvNef5qo/4aR589O463q6tL6R6zh8hYaxz35Qr8l8fi90flfdKr0CdV
ySHCktkfNQOix12z+YnK8RZ0nh7mc7WCuOOx+Ljjx1t4FY0TYL9doVCOCoVjGTDuKoW65rES
2XN4oOLlYa86+xJhyfqU01iO/vK8+YI8j+XHLs8TzedTle6uJt8PKbAnHmug9/YeKJvDc1Ka
FelFhJWMMu/1WvHXkqDMIizZvb3P9n7eNZqz3F3o5htg7ipM/bmL+MADXnOc2L8BnjdbD9ci
r56OrvCM5hZkDXWoXLoeAuh+HSqfNhkzjHSEsgLRLIdp6LoW0YSM2c/4neVwFfp1NroOwgZE
tRyqIvNys8Gae0TTKDw/Fc9NymSe+Tla9l0/8zudT5bD0Wcw15nMd3IYWhbPT7Do83j2JFed
1oWITXYoSOt4rIFO6z5/4xVbv8fPEtFLu0K98FiJyPzhzt22MuNniZQpVNmCCEtGZlW23UF4
6FQQhzxWKtv2PoV64bGS1bZV2YIIS1U+TttxvDDwcy/WvvqA0S7Cr5nBrxVCL+3WAHn4atoO
4xxoW/T4NZcba3qceKhEf42s44PffzX7fxn4C3/1/0S+j8+YHj8fCuZeC/rDh832ijEW32n/
y5rUFmnHOc98vnTpqwaexsjDt+N4ufIRG4eDGSdd+h8NXv+laW7Uuih7/29TJ/w9jR7/N2gc
mc/LzzffXz3MfEL962f717T/+rj1Ow2142643xhDH/ndH4U34+sm3rJcfw3Vm+ET5H71sG/g
2YOGbfi/4YdHwJxXYxcnWb0TUyZOkE7wdAOjDMcGyvubz5txsf8y0w+on9B2S6+NP1D/oYHO
UaJ49LtUl/SefQ+fKf2KB2fcz/ohhabv0fM9XJwAiZM3SToQa5x4E6hHtEP/9Yh7SNmZrUd0
kHoEznPwmmdsLWBlpBYQDucw5Wy2DJ5D+Mhlnjvxald/miDQwUCX0ztJntOjIM/msVK5LNOt
UC88VrKWZVTZgggr1dok1saQljxBZGDTkk6SlnQTnK0QhCkIwcfU/ZOhft5D4ueoAvvmsVLZ
73sV6oXHSla/V2ULIqxUrMPQ8ulQiC7/0u+t1aPrNnyo4e7PZp3oC8G6hrRs9sDxBy5KofLy
OrbOscOqc6zj6xykjrIuvjrHuoju/evMOofod0q/97t0DQB/FA5dazeHnO/i4tiuDnPTBykV
J+vPUh1mPVeHWS96L4Y6zHr2fCQJ6jAPxFDuOELsii139JByB85zNqDjEmiCRgihWG5Cccz2
ZoTD7Dp2dGdLfJ3O9W+kYn3mKMl/0rXE828eK5XLNXiugSq98FjJWq5RZQsirLPR75BO9F6i
IA55rFS27WKFeuGxktW2VdmCCOts2HYJ4aFSQRzyWKls2wsU6oXHSlbbVmULIqxUa4faHEN5
EK+DnsGVB7HcuDyI4/wqwHMkpqAD/82KGmvCHvG0S8U6di6RuRN4fkc5M+6NtQn67OdabOtr
irAGa8wy++0KBznKJeVQuX4rxl3loOtVkrrmsZJ1DKKdfcUzBrE8DpkHatwpXUeWjqPi43M1
ic9gjPHJY6Vq3oplCTroJSipFx4rWe2cxl+LAjvnsVItb90L5nx3PDjhF+ho4uKaPstl8tZZ
xAcOENvYAHQ9+wZjlGkVNBqtajfAjcYeAkMgeh37bG7cKLu+vS/BvFh1uhFixqjx/hEi/tEe
o3/wWKmcbrQ76KVdUi88VjLKfFCzt4V40o1QAjKrsu0OZswCH4cdJA73xRiHPFYq2/Y+B73s
k9QLj5Wstm1nC/HYdkccMidTnngTyePwOKl/Bry/aN888R4SR2ye2EHyRBzn3yL9Dw2oZLAJ
5Yc6LDLyUDavy2fGQ+QkSX7XyYxn4G2/k9h+d4y2z2OlcprQ7aCXbkm98FjJmibY2UI8aUJn
HDIn21go7ON4vNNywPvs9U0T+LFQs4gPHND4sVBmOTdZxkLRtRtpfx9v3z3EvntjtG8eK5X9
vtdBL72SeuGxktXv7WwhHr/viUPmZCwLHCFlgT8L/P6IoCzQQ/y+V1gWqEqJssBRpp+Ut/2j
xPZjWedPhJXKaQKW2U4v+JmMXnisZE0T7GwhnjSBxzobdd90zeon5eMwncRhcYxxyGOlsm0X
O+ilWFIvPFay2radLcRj2+lxyCzK1zSb8WVajNeJ7G+K8y+8j+1v0Xms1je/w8/yuPwOy32A
2Ea8+8hmQfS6ApnMmbYJZ0rkjarTjBISt5UC3yghvlEao2/wWKmcZiyw0Yus/4iwkjXNKFEk
swgr3jTDkwTl5XaSHuDxGHugrz/QZ9lc+lFC0g8c/3j+oU7+qtGx1ehNakFph7UuSAZTVs6A
6H2Q/YrGcrDXOL0qJPT55Npn7KR8ZePm2vrmwDV6SA8FgiG9qU5fUn+tPn2JvrKlua52fUBf
19AUCurLVixZPk2vrQsFmvWVy6+aNlsPblixvApxi9ffXIEieFmaZTvgabNdF/CrGKy9qNug
3IiBAgij2NHgFNHYQWNtHLoHNhsKyMGHCiPVoDuzzzPex7bzD4Jx/2z4GnmepePa4ViJN1SH
+TDK8NcaJtW5krneC0uJP3sAoqhE4cp+ni8gsxw0GAPHgMpOZwN4SCqVxoyipyPrfYxX0tV+
sEflEW8qIKnMMOJZw4mHjiRxg1PtUcSj8WqpeKXCSmPtMi/5smEeGYUR/nXC2UIDv6Z2XUtD
bbPeHAi2NISCzLuRkGVi4Hc9kXcNVDGxR4bYK0OcJkOcLkOcIUOc2R8x3TZeR1GGI3kCiWxL
7YuDofpNtaH6pka9GqWBNh/yiT/k10XEfo44W3cgzpYhHiJDnCNDnCtDnCdDnC9DXCBDPFSG
eJgMcaEM8XAZ4hEyxCNliItkiM+RIR4lQzxahvhcGeIxYuIlsBQlMBlZaaDnumUQN7jhyxI0
EM89jbckugYVW9YYpb5YqD/ekaxnqpM1pCS7htyTotOOeA+M8YqB9P3IHOOfGHmhZqXCxoGf
/hRuZuIHl0zOIBCcgVfrW2sbWgL6BLO2OTFhQ9h/uPCGXd2LKrH4Z8JQcDP53WJB41gI6c24
TKfOFr+5/4e17/znsIUmC5qABQ/Hwgo9uKWlFlW6VbHw8dqXrj70q/eIFjwCFrwcC5fW19UF
mgONuH4fCG0LBBr1TYHaxmDcLFQ/dnP52P+6vMtkwStgIY1jYVnTtkCzvr6psa7+GoORhvpN
9aEEtLDimquuf+qZFYSFNAEL6RwLV27erJaFT0fel/X4pnmEhXQBCxkcC0tUmyObJJwJZwhY
yLRzyiWKnJJl5Uw4M8LCo5E2DrZtiLLApu0g9YZH+g2v9BsuVy5XLlcuVy5XLlcuVy5XLlcu
V18VrnL025h+Ztpxgjs+xpEeMLxn41JyrzH91nhMg9lbvBL3Futbg1P0S5oaQ81NDWb/8Y7s
dC1d03LSrUWraZVeY2pMVOK3Fs5t8xg9cO8YMr3V5oMFDr3Yl+mXL9HrG0OB5sbaBok+bNxB
orl92MI+bC3Sh/3/s3clgFET63+y3W2722O3UASLli2HFmjLtoUeQGFbDimXCEUUUSlQoNID
2nIrFIEKAlo88UJUeKI+kEOBh1fleXJ4ID71r74HXoCIoniAKP3PJJNkkk3SzTbbdtsZSJOZ
zH6Z+Wbmm+uXX36Cyonwag/7JzzV9NzD5leTxP3rEXWs44302L/29hfG719z7WoDu/LF71PT
vWW6tyzbW3bQvWW6t0z3luneMnXUUUf3lunestLesvLMVKl8tOeycmfS/Ysg3b+gqaKpoqmi
qaKpoqmiqaKpoqmiqWopqYpwVuLV6Agg/cYKvz/UEx4DFfaHOgn7Q+xOjDMvK2U6u0k0ZsBo
IkiQ9+U1g/a3r7pPcW8o030M7w1NBPMWAXDmNqkmdjHke3igwfZ20COLCD//njXv5reHaWsF
gHPQiMEoNkr3qSDxWz68qwwBIAMG9sIcbZJ1qt1m8M5TJuGd8Si8m8DvMDiI/IfJ/Py7pO2A
9F3ZNkB8d9cGpO+ixgLx+0ikbsl31cn3gNG7slM0dMD/Pg6cIXPcX/la2ZHP4/VA5sdIPnO+
7uzFXNFK71C/iL9hXNc71Eqy+HfBeRXJ+cwZYAxX+B78AK186HkXXC5L6V1wFE3p/XeyrJS+
G4fCf9T4HtYIMIb92ms+KAHl7FUB+4WsqcD772Ft2Cz9npvZo5Y58F/uS7W72t8vfFPMcb8D
bIm6RPzu2yUMqLRw37PaE/nYJeh8Zgf3PL48RanVEpvE39wSFYdUAcKzuW+i8X65O5XU5yEy
/tv/6sZ+D4x3/PewHDu558/cKf2OHfqd/HtYDKF7k4Luqxmqe3/pnuSQn0SURxRxPYywyRbC
Xptl17BTYXeWkKy8kaNGBcMfXwOvj+L+2o775SsIP+/a4WMU4PgtUD8/Ed+rAj8K9+OJuIzH
F/I81lFBCDzsOs894LEYHrX43J/3f/8sWFwD5cIM3QjPGZVc/l4I0pc/xOtQAQ83rgBvgRUq
+Qv1yFN/Wf6+3ZEFvnuhLzyywFd7BoNvdvQFJ/cOAcd3ZYNvd/aFRx9w6l/Z4Dt4ferlEeDC
fxaCXw9MA99A//HdOeCHV0fB+Lmg9ssVoPaLO8DZdyeDXw9OB+c+nAVlwzi7csBvh2aAcx+U
gdfXF4D+eb+D3w4WgoufL4Oys8Dm6krgzvsNHr+D84dng5N7BoHT71aAi3/9Dv731d/g8Wf+
BK+99Rc4XZMHTr0xDfz1x0lwBqbz7LuTwMnXbgAXfvkS/PzWTeC/O0aB5597Hyxecx58+q+F
4O23vwMvvHwBPLvzArh/w5/g4oXfYX4vgv3v/wUY5Dp7OhQc27l79+5pfbp3752GL/p05uLD
o1t3hunaDV90x/GVwxkkp1vv7t0zu+GLPjh+N5lL81G+Wnw1+V27du2W2bVrv274ore2/E59
k1J6ZWRJw83M5R2vTEzumZ4hyZfNarXGXZHgSu3Zi3xuD2urdpHO6OhoV3KKRI41qm00cgmJ
SVL5NmsXFH7FlfGScHNMBxTsjOvYiSyvS2PaR0e3uSw60no5E0v8Y1pHRre5xNq2nZWRuLDw
iEh7qCOqldUsvRHMhIRaGavVxsicKQjFtMhC5XYK8TQpfV+DZ7zgxgc1wlg0GdtBNA65HNSP
Q2o7lpXOcLvF5NiHv2eXjZPIsZKvHFIhRFgwENFC/ItLNnytlQfUL7ixvUZxnUAEpDg05kO8
X4WPR6Lny7Gee9VTz7uxrGSGmyOSeubv1aVn7tsNs+EcKx9q2slqu5z1V7Dfd+D1Rn7DwSbT
bxiQcvDwGDZ/6pms2/HA85ubRs9ZkOsNxG/AyMf66F4P4N13gZRkNdSchX82o5EPoDMfpCwj
0thDQ9c9dOpaSZaRekRy+2jUh94660Mfg9N4rUadvVZnnZXL0jM/lddv+Td+yPpdn2/8NIU8
l6H5mJnLb3/ieby/nbD+U8vUtV7DTxuL8DrgBjy5c2A7GQ/EawZa0SDlyR+SxP9vVm7y5MmL
CgoKam+55ZbaGTNmKB7ovpaMqVOnLpo1a1bt3Llza+fNm+dxlJaW1qk2+PxFs2fPrl24cGHt
rbfeKjnKy8u9UntJScmiBQsW1FZWVtYuWbJEOFAavNUHTMMi9PuqqqraO+64gz0WLVqkq9hh
Hhah369atap29erVtUuXLtVdbWC6F6Hfrl27tvbOO+/0qdotX758UXV1de2aNWt8rrbw2Yvq
83vk4O8XNac2Q64J/qCxJpjNrkLls7Yn1XUJuy5jJtblvVmXGnV+dMznjHSPhHTO7NA27PrS
laUPo3UeN47PO7k/EZ9fl8nZ+X2q5Bv36HfovHnGJnZdbKPDlsGuk+GEdMfxvgn6Jhrdd+F0
COtS93z/IDp3/oML3xZSxqavupXtRnJd6oN/P8Lmd09Ex/bk7zNCOrZXWhO8hJifyMenv7/z
Tr36vXFA/NaYvN8bh/shb77npySL779NKv23ycD+exxOo1o+gM58kLKMSGMPDV330KlrJVlG
6bFcoz6U66wPcllK4yCTytiPnwfvLi5m05CH5Y4H3PrALFka2uF7DBB5YuV1chSeS4cBZW7c
YD/M/yqA+L0zuT4rsD6rvdSnXJa8fcnnfyYD5wQVOI1q+QA680HKMmr+p6brHjp1rSTLKD1W
a9SHap31QS7Ll/a1dPkaSfuai9vXXQrta65C+yL1hNpXSgO3r7VA/HaYXJ9rsT63eKlPuayG
bF9rcRrV8gF05oOUZVT7UtN1D526VpJllB63aNSHLTrrg1yWEe3rPty+nlNoX/cptC9ST6h9
pTZw+9oKxG90yfW5Fetzv5f6lMtqyPa1FadRLR9AZz5IWUa1LzVd99CpayVZRulxv0Z92K+z
PshlGdG+tuP29Y5C+9qu0L5IPY3C62UN2b4OAPF7V3J9HsD6PO6lPuWyGrJ9HcBpVMsH0JkP
UpZR7UtN1z106lpJllF6PK5RH47rrA9yWUa0r/dw+/pWoX29p9C+SD2h9tWrgdvXCSB+c0uu
zxNYn958e01JVkO2rxNYt2r5ADrzQcoyqn2p6bqHTl0ryTJKj+j5avUB3dNTH+SyjGhfp3D7
MjGe7euUQvsi9YTaV1oDty8LI36fSq5PC9ZnnJf6lMtqyPZlwWlUywfQmQ9SllHtS03XPXTq
WkmWUXqM06gPcTrrg1yWEe0rFOOLOii0r1DGs32RekLtK72B21dH/Hyl74Z1xPrs7qU+5bIa
sn11xGlUywfQmQ9SllHtS03XPXTqWkmWUXrsp1EfvJXVSkWWEe2rC25f3RXaVxeF9kXqCbWv
DIX2xT+Tx8PtZZTxc3XtldWnLfLPXB3EYeTqo3slWQ3VFvfi8jEqH3JZeupQQ+V5VZBxZack
q77tRisNT5lEgjO+3cjrD2o3TlznyWeS75L8oPEuSUDs2f94iN2TP3HzvyXvevB79h+YpL+r
75798MttXXzdsydxvDU1NYZ+V3Yvxlqjsu9tQPuVy5J/E1XeJoMMbJNG5UNJlp5vogYDKe6a
7E+MxFvw7+mhdI4zoOzksuRlJ8dbBBmEEyCf3cfAfPQxEMuA5F5roK7lsurznWF/lcuqIOPq
l5IsvW1KC8tRV5+XpdDnkelR6/OU3uczyu6Ow8+vMKA+yWX5+3ve/qpz6J2UMoP0oiSrKeb5
ziCx/GbXM89KsvR+z7uxv+E9hNHOdw30XA+93Yj2XIPbQFUQhxPbANB7s4VgGmzVqeAq+DcX
+p0wpIR9g6sMntEI1QkljIZ3RoIUeJ0PpuK76A3okeA6GJoOr8vBdBhrJMgW3skNA+J7Rw4g
fg+ct1XkO0ooTggQ32EyE+H8O2QRMpnBst/y3xqPIOLy8Wz4iCTu+/LtcaPtWwWuh2sNsG9y
Wf62b3/+94hqW0f36qOXagP1IpdVnzyfXn6Hap7RvfqMI4yqC0qy9OTZqLq9FqdhqwFlKJcV
yHV7i4F6kctqqnXbqLqgJCvQ+u5/grr77nuxDLLvXov7blTmaN1Iufd1wmdkwdDpuvpCvl/m
39O2NZH+cSsu6wMGtBW5rEC2IfsN1ItcVlO1IUbVBSVZgWZDJnphQ7bhPJA2ZCu2IfuxnDnQ
ciQB8QstwU2k3R/A5XPCgPotlxXI7f64gXqRy2qq7d6ouqAkK9Da/QYv2v0h3LeT7f4Abveo
zKezY4cBcLygPm6IxEegjRdO4PK1MPVvH3JZgWw3EG7OKL3IZTVVu2FUXVCS1RjzaQvWe0cD
ylAuK5DrdpyBepHLaqp126i6oCSrMep2R5yG/gaUoVxWINftfgbqRS6rqdZto+qCkqxAG+/N
9GK8hzg9g2XjPZRvNN5DZX4di1dPgkcKPFySPRTy8GX85u0+cH1wgAir2JvYwyXrBH/vRcY7
riglWQ2FvyGf3UcjH7115sNILjIk91oNXV+rU9dyWU11P12tfvmyn97bhzz7C0PBc6Lx+4Py
8hyHy7Pcy/KUywrUvhXlpVxDL+U69SKX1VTrOV9+sw2o53JZgbiWgt7dQjiJl+BRKitr/h65
lpKG28ALuG5MBzw3axEoAE6QjTET88EClg83HEg5WcMInAKJdbABkZvV177YaLtRQey9yttH
BW4f1V62D7msQLYb1Rp6qdapF7msppjnPYx6XfDFblTUI89G1e21xJ6gvAzX4jLc4mUZymUF
ct3eoqGXLTr1IpfVVOu2Wl3wpW6v9SHPTalPvBX3cQh/sBKg72R59on34jIi+8S1uE9EZT4B
HgNgb1oERwbFsD90ghy2DyX7Ogex3xjRRPq7rcR+obzub8V1f7+XdV8uK5Btwn4NvezXqRe5
rKZqE9Tqgi82YasPeW5qWAPUxhGeYCRA34zxtAlyrEEabgMvME0ba8DzEPH7ffL6fQDX7+Ne
1m+5rEBu98c19HJcp17ksppqu1erC760+wM+5LkpjgUO4bHA1wrt/pDCWOAAbvfHFccC2QEx
FjhB7JPK6/4JXPe94axRkhXINgHlWU0v6J4evchlNVWboFYXfLEJclmNMfe1MOI+qbwMLbgM
47wsQ7msQK7bcRp6idOpF7msplq31eqCL3Xb4kOelfo1+bdRyXBvruvzrS7Uf6FvsiEOhFjG
s79D9+yy/g7l+wVcN3z9JloovubfjQshzvyacIiOvtFom9ERl21/hbbRkRG/dexN25DLCmSb
0U9FL3rbj5KspmozOhqUZyVZvtoMUxMYL1dje4DwGGuAZ3vg74XJ7EdHbD9Q+aPvhzvxv1Hw
mMPuJs2GtkN83zWYGCsHA+k3/WwGYTnIa2SvonF8B762gn7I0pXMzC8sK5jirHBWFJRXOEun
OgcXTnOmXuXMHewsLKkoKCvJL3IOHz14ZIozfyr0OseMvC4lnfvoPUwrYpIaDYt3OKa+iWDT
UdlgX60PBCd+VbES9Gb1HwVqoaYYcAGXzx6QAMSvOZIuCh9y14e1GTzXQ1/296jmjACerEOk
G4nvhzrR3DBWxy+Mdlkghm2tCbiNobBE4noDGIJbswnrkNFISWId9/ux7QzFiQXfAz7vAOvQ
hG2UGYjf2gzBdtlKtEn+HXbUnuy4LUVhG9Mat6s2uH22xW0T2ewY3J4R7xfi3OnPsnAE4Sez
1SM4WrC8TpwyNys/L3/S7KL8MmdZQfnsoopy4reCCxXzbhJ+y0pVjmzSEzlIT2SznsgWPZGD
9UQOqSsy/wFUJyyyUFyQoRK1DyqvKCzOrygsLXGOKiqtUHmQVflBNqdSZJsscphTI3KYnsjh
eiJH6IkcqSeyXU9kh57IUXoit9ITubWeyNF6IrfRE/kSPZHb6oncTk/kS/VEjtETub2eyJfp
iXy5cuTBYAg0MMGhZuCMpGMQ6qhrLo6RGwHZrFWvuxkOW25mR33exP5pcVM98zq5GY9kb8Z+
PHRa7OuBZBxhJT0kMJz+g+0LGdEKswe6+zS4jSgfNNi4CIWgDnyUc05+0ewCZzw31+xa74rw
5TWD9revuq8/yv7FWhB1Gw4Xk8DIklDhLENjOuPq4orOFSM+jAtyc0lgFJJgkiVhtLN81ux8
OOU2KgkD/pe/dsqfu7AWTApJCJIlYWDh1KkFZQUlkwuckwoq5hYUlDiLC/JLyn1Owhdbl33+
9h87cBKCFJJgliVheOncgjLn5NKSqYVT2IQUFRYXVtRDC507frj+gZdW4CSYFZJgkSVh7MyZ
xiZh76MPzooseh0nwaKQhGBZEgYbXR0Phl1SHHbehKtjsEISQtQa5WCDGuW0yvlf/7LtQayF
ECEJzwhrHOTaEJ8E0rYDXb8w6f5FkO5f0FTRVNFU0VTRVNFU0VTRVNFU0VS1lFRFOCvxTlYE
8XR07ow3TtDXXwdiP0PsWneCB7Fb7MzLSpnunFOe5BwzYDQRJMjjp/MMMVvin3fMHVrJ7QVa
WWTMqLLSWwomVzgLS6aWOpPh1I3bu4azufKK/JKKcrw1fSKIO3i30USXz4jlMmFreiO7wenC
2rEBEd6ElFdMHLfRo8keAG9TFyuUNlqeQ3Ac1PadT4RI7m1hD0YzjN8x5XdJwWIT67+LJScR
wELYhcuejlYb+FrFKKSON0h2Wfhx9nnTcf44X6HEd4vEN0PiK5L4iiW+EomvVOKbKfHNkvjK
JL5yia9C4pst8c2R+OZKfPMkvvkS3wKJb6HEd6vEd5vEt0jiWyzxVUp8SyS+2yW+pRLfMolv
ucRXJfHdIfGtkPhWSnx3SnyrJL7VEt8aie8uie9uia9a4lsr8d0j8d0r8d0n8d0v8T0g8T0o
8a2T+B6S+B6W+B6R+B6V+B6T+NZLfI9LfBskvickviclvqckvo0S3yaJ7x8S39MS32aJ7xmJ
71mJ7zmJ758S3xaJb6vE97zEt03i2y7x7ZD4dkp8L0h8L0p8uyS+3RLfHonvXxLfXonvJYnv
ZYnvFYnvVYnvNYmvRuJ7XeLbJ/H9W+J7Q+J7U+J7S+J7W+J7R+J7V+LbL/EdkPgOSnyHJL73
JL73Jb4PJL4PJb7DEt9HEt8Rie9jie8/Et8nEt+nEt9nEt//SXyfS3xfSHxfSnz/lfj+J/Ed
lfiOSXxfSXxfS3zfSHzfSnzfSXzHJb4TEt9Jie97ie+UxPeDxHda4vtR4vtJ4jsj8f0s8f0i
8Z2V+H6V+H6T+H6X+P6Q+M5JfOclvj8lvgsS318S398S30WJrxb7wtmJDO/4MS0aebgXowkO
f9eKxykotAyH2Sv74vEPQ2w4oyFzAXFtJkY5obLRjJWVOwDPUeA8KVi4dZadNQXh2dNlOPRu
9otdPJotVLbjalIZTIXXMfCvxjPCe4Td3F3sc4KJOHYs247nfSacqjCcyitxupCEJPxMtMHW
m8i23c2pzFqHykI1VYZSdS3aoqqXviwG6ytaJitcyPNKHFvcKw/Fc9dwmJtUtOuHANaDnGNm
l03NR1uwRaUV5c68svyS8qkFZWWFJV4BrdmHmNwUaK0wm0U4TM/ZrA1XmGR8LCfGt/RoeocL
m5vbvJjNXpS1ApesoUf+ig7P2SzZekwes9m/8V0bTgUPRudns8CL2ayJOKS9D59Pz94nge99
ZrvZWoqex91FoYnE3aX4LmdoE2RgqHDC0PLG1UbknJEY2kiub6ooKy3CVsfT4JqwwXUoGlxS
ZhShZbmzeWVwGaEDSaxXvsKly5D1ypXdkFx5dhHhThcQX+XhOyor9icSNTWBuOY7FjuMmcB3
LAOceVfnZQ/H7+wUFcwpKCr3qkdhYTq0R1HsUcxe9yhV1HI3ix6FdAxbroxmmHc9CmkrGrJH
yeT7jJlAoUfh6Yrd89xs/RV7lEyZ5bU3kx6ld73yJfYoY4hcMU20R7ETPQpvuXoTNTVToUdp
BXOZyPcoA2VTlauKZmcne92l0ElKfScptEuhXUrT61JyNLuUAfzdOfIuJUdmels1ky5lQL3y
pdylNNVJSiuFScoAoqbmKHQpberqUlJol0K7FHq04C5lmGaXMpxY95J2KcNkprdNM+lShtcr
X4HVpbRR6FKGEzV1mEKX0o7sUgbLuhTvOWtol0K7FNqlNM8uJU+zSxmr2qXkyUxvu2bSpYyt
V74Cq0tpp9CljCVqap5Cl5IDY14N1HnRvNtd6S0nbfJEo0fgdkI7HaVORwuNvhcTDn7JUMPe
HDsd9DHEdiZGM4w3HFZG2jFxnQ4KvZO4E04YPO61dO1OJ5TodEjqD287HRsjoseEHQYOCsVI
n4IWSqbC4wZsqtDPwmV5uxwfVi6tDjCJ4YPRxXrOIubK+2jE2+5k3Lk8t25N0NEhfPgok1sW
v5IFgq5g1rHxUbbc5pnsNYJhrjPtYa+3wz+bmYSh6Pp6+CfPFM5eT4NHZdgoD5kT4M344DPs
b4+iIgypEa4/xdeHEW+oOYOVg1j8Qm3ncvlrEHbOQ2YhDD8XxsVBUOQz4WKaHe3FNINIMc0T
QhKGyuWwunSsyOVLZJ3jhHBdGXUi9yzoGyRFmCGNO2VV5hvc7bSqw7wp/Y5nJlW6F4t7TaV7
BMNqHc+rlPwOjdRbq8gciHtkpXtjAEc5pnQPvX7RXeUeAtB3Urm3h+8CdeYBgZ5jVWR+jft8
pXsXNO61hgE9VO7lwIAOKvfy8T29eajUkPk4o15GOxj1MnqdUS+jTxmujPSmM8jEjT2VZEab
1NtDMr4XBa6BVyNMLIdlUYEzuyS/aP6CgikgkmEGlBbNLi5x5oBQhplTngSChKBsFCQbfgE7
wzihw2QlIEzidZbPLi7OL5sPC5INHlM4raRwauHk/JKKovnOKZjspsIZP8rZ1+lKcvXq2h9c
yUW9uqQg0Vla5qyYW5pYkV9YBJ+IhfYHHbgoFQnOKVOhMWaGlM51ToJjwMJyZ8X0AkHuZBg1
hos6oiC/hHsLEeckWjE8hw9X4+Fxxuc4E53ZXZ3bnWMGjQDduNiZvbqQbDUsOS9MKmjP3RZ4
hZzxBRX5vKcrus1RuzgrSuHvi2fCYJjFssJ8KKWc//XgBOfAwSXwz9QpflH2wHyYpny+AkTg
3+YXz4T1orxwQUGCqLRL1W/moJsf02pFq5Xx1SrKMRpWqZG0WvlcrfZx9ao7rVdkvRJXQNCA
nl8BGWESV8rq907CPDwy5cegreBvY+HzumAZyXA8MRCOG8bA8cEtcBxwPxyT7cFjrzdhzK/h
uOgCPFozSSCb6QAmMtyYZjE8r2daw/GzHdQwbcEnDDeGMJmiQGvT5XB6fjnYBeIZIJkU8TvD
rYgJOz+WNQNx7BoMxPEousePP9GkiB9vojUbfnyJpmv8eBJNKvnxYwQQx4Ro1e1rAvTEj/nQ
+B2N8ZLwWlo2Hn+hNE7E19FsjrlrtBWxHo/DLsEzCDtOUw0jMnt/gsdVLI85HishmtvWePyD
5gwufI3aDL8GZ2PEsicngeOJMJ2TwC9ZX9+h8kkgmhSdMc0UJ4Eh3CQQvfcab1qRq1a9UJzB
SD0WJ/vbGLZO1gwR5IRzctC7UR8ET8zlZX4apC0TzeNrQh25/PUoK3eNJrFnzNXsNXqLs9Ky
IZdPgzvcqSkT/XZmMPfba9iJn4u9RusP2yKBkPeJsUeHaMlhNzs6bBjCXx+F1/omgT18mAT2
0Jh49dOYBA4Cyh8G8NYpybwWNzSlexNxo1W6N1UjncW4YSrdW+iHPKzGhkNtQqp2b73G5Hg7
NhBK9970Yrlabx7ex8ZJ6d4xbACV7v2AjYfSvV9xGRmZTmRgLWrtgeHuRcEBEvehOD1vJ8Ax
BLnPEEYMu8hdFdgxwz7blZwOghmmWzdgYpjr4SABxssThkjQ3DIVWT2T0lIz0NgoKwP9KtkF
fwcsDNMzMykzFV0k9oIh6XBonOxKynChQV9ies+kzHQ0DElM6ZWUnAEc6GnpKRmZ6Gm5cGRT
UlgxP8HZE/5H8fuipLiSQQhKCkyMWUhML8DgPx8bog2LijYsAaaNKIcVf3QsILSxj1eH3T/q
UB4pmhnjR4o98F877GJCYFciGuFroTGbCA39VBheDA33QuLeamg874fHemictkGD+AZh+N6D
YUehYToFDdBZwtD8CY1ALTx2sS95RxPp6oHzxHeAqJPtR4wU+Q4uBIgdEzJufEdkBWLHg+7x
HQ0yjnzHEgnEDsEOxA7AgYcNrXC8bThtyP8GltcGcCQHrfAo8CiWjUZ/p3Ba2gHuFXj+u25/
YoPIfr8AX6Oi1noreIAxO47y75XQHcf67zjyMJct+OBhLhTq0vx2HGsAoxnG7ziGE9GChB3H
cEb6VFsD7zhG8DuO5eJzRZhLpOpd9u1RhbvcRDVctls5AJtc4WsrxG5luCxbwkTVe86GcMYT
c2IkZwPPLYGew8/FI2RzcT6LE4DIR2GTZdGCD2WcT44QR5iQgndy9F6fZfs5Ek1jUak+9fF/
zPZyUR65gGOnKIfqLfUSqwupxE+UozRKjC+ZSJWSudGrkvFEKl3LxrUQixtPdVr34/p30t28
/84n7c+PvHmo4M8PPrd5fVVvwX/dyK7DZxSNFvzjduV2bpM52t1QZdUaj2Jko98oh8oN9XKy
e1lOdi/Kya5STjdplBP/UQorawWIZDsTndLqNoX79h7DwJEyHJtD7aaxsoKI9vXY8Sf/V/vK
6Bren/GP8r1p1lzBX/xnzozPEzJrzgK3rJyCfCqHrnhBiUh3RGKENN1Q/SjFqHR0RVcvsy5e
llkXzTJTH4cOhKUxSmMc6uVboBT61gDQtxMU+tZsB6KdFKBvnRSgbw5F6JujkaFvUarQNzK9
VrzjMxXP5+WDSQeFvlHoG4W+Uegbhb5RjBLFklDoG61WFPpGoW+BC31zUOgbhb7h6SFf9uQk
8GYF6JuXk8ATrM+tCH0DQSL07SgBfXN5AX2bSUDfnAT07SgBfTtKQN+OegF9+4CAvk0koG/n
COjbCgL6NsoL6Ns8AvrmIKBvNQT0rdIL6NtEAvoGnHqhby4fJoEujYlXf41J4GA/wMbGaUDf
8jWgb9M00lmiAX271Q95WKMBb3tA497jGpPjHRrQt7f8AH37QAP69pUG9O20BvTtNz9A3/7S
gL4xAvRNAm/ylkYxQRf2LT2jTnxTalJmchqLb0qT4JvSUpLS01h8U2p6UkpPODbOTOqVzKG9
0lzwkoU3JcOfp2N4U3JGhhTelAr/a8ObeiJkU08O+2aIOrThXoGjjigHwoEHB4w69vH6sPtH
H8qDRYsf0G8u/NcOe5kQ2JuIdngctGf50NZPg+El0HbfStxbA+3nA/B4HNqn7dAmvknYvvdh
2DFom36ANuhXwtZcQHaAUUK/uXCeXAT6rT8xWBxMoN/GEei3fAL9No1Av5UQ6LdbCfTbGgL9
9gCBfnucQL9tJ9BvbxLot/cJ9NsxAv32A4F++5VAv10g0G88/BeVtdau4yCDdh0p/I3C3+iu
o//hb60V4W+tGxn+Fq0Jf2ujCX+7RBX+1lq2YzlIA/7Wuv7wt9YNBH9rTcDfomXzcT6L+Qrg
ndbCtxC4Qxn+libE0Q95GyWD55ibAMSttR8hbm1UtD/JK+17QtykukdDiMkl83L4687rnheu
Z8+4Qrj+q32J33TvO2SttR8ha5eo6H2yht6NhawN39sv4ebskQJE7a2nQbv31+cIfjDWZv/r
TPcAg6y1bmDI2mAfBo8pFLJGIWv0aBTIWltFyFrbRoastVOFrJHpteHeEvUTBQqQtbYUskYh
axSyRiFrFLJGsUUUA0Iha7RaUcgahawFLmStLYWsUcganh7yZU9OAqcoQNbaUsgahaxRyBqF
rDVjyFpK/SFrPb0BJaX1UgAlpfZKymQvEtN6JiW7EEFZWlJyGovRSnalJmFGrp5JvXryjFyp
/oWspdQfoxUw6vACstak1LGP14fdP/pQHixSyFrzhqxdZdCuI4WsUcga3XX0P2QtRhGyFtPI
kLX2mpC1yzQha5erQtZiZDuWV2lA1mLqD1mLaSDIWgwBWWsvm4/zWZyqAN6JaZGQtRg/QtYu
U9H+NK+07w1k7Zus9dn89RMbNgswNfuTq4Twr+dsy256kLUYP0LWLlfR+3QNvRsHWUMohAc+
vTLylZPXCxA1U+QTQ0cEjxL8uyIKL5uzKiPAIGsxDQxZGwJL4xqNweMg2eAxryy/pHxqQVlZ
YYkmcI2OHv2AWetmoiO05jp6LFDArBUoYNZiFTFrsY2MWeugilmLldRwZHC4juIWBcxaLMWs
UcwaxaxRzBrFrFFwEQWBUMwarVYUs0Yxa4GLWYulmDWKWcPTQ77syUlgoQJmzctJYDe2Nlyn
iFmbSGDWNoSKmLWJXmDWPiAwa0cxZg1db4ioETBrrpCJAu4s1FxdJ2bNZRUxazUEZi3eUi1M
6vZY1gkYtA3hrjoxa5sJzNpMArPmtIuYNXeHujFrTqeIWavRjVlL82ESmKYx8RqkMQkc7ge8
140amLVpGpi1Yo175RqYtSVeTJz15uFeDVzaoxr3NmlMjvdo3DuAG7GRefiPBmbthAZm7awG
Zu2CHzBrJkYdsxYiYNbQJ2jCeFSSrhV0kMJjk8rrRq71SuewSSXlCJs0shT9lUOTYKyMjAyM
TYoksEmZaUnw1yydVlJKGoJq9UrqlYqhWmlJGSybVrIrKSUTDTfQOKFnWipCH/mKXDNQKVqA
rUBSSpQDUYuFB5hS9vFasftHK8rDxzA/oNjS8F877HdCYP8i9i43wl5hGrTwxfAoh9Z8CWG1
74UW9VF4bIJhu6GV3E9Yw49h2HHo/wVapT8J68MwFqh/JRRbGs5TGoFiG0QMH4cTKLYbCRTb
NALFxvdG6F45gWLje5tIIPYS6BmPEii2TQSKbTe2+si/H8togxeXeRTbcQLF9guBYvuTQLHx
6F00egjG16jEtTYicw3diBSxbHQj0k8wtqX4TDf+WiaMLU4RxhbXyDC2jpowtk6aMLbOqjC2
ONkmZq4GjC2u/jC2uAaCscURMLaOsik6n8UZCoCeuBYJY4vzI4ytk4r2i7zSvghjK1eFsd3+
91OCjhOXHhBgbIdeelUIf+75TxqIea1cDcZW7glji/MjjK2zit6LNfSuBGMr95l5bW/w9793
fs9Vw5dHTVzeM5+1tgn+e//qeumN93R2+wfGVq4PxlbuLYwtroFhbEPreAdisGz0yH28njKv
NQaKjTKvUea1Loooti6NjGK7QhXF1kWWqqG4nyhVQLF1oSg2imKjKDaKYqMoNgo3orAQimKj
1Yqi2CiKLXBRbF0oio2i2PD0kC97chJYooBi69I0mNfQb52YbY1dW4sQmdfOBIsothNBdaPY
zhDMa5UEii3UIjKvrSOY12Z6wby2gkCxuQgU21GCea3GC+a1DQTzmpsyr5GTHY20TNe4V6qB
YrvNDyi2uzWQaus07j2hMTl+Aagzr70DjGdeO6yBYvtGA8X2kwaK7Q8/oNguAnUUW5CAYkOI
mxAem+TlArpO5jVXGset1Q3FUCHX6pmU2Yv7HiT37UsBl9QzIym1F4tL6pWclNYLkY25knqm
sGCt9J5JGZhcKyOpZyr/PUhXupRcqxf8rw1LSkOIpDQOwWaIQrTJxgJJIVEOhFwLDSCF7OM1
YvePRpSHjCGNwL8WAm17CLThkdBWi5b6bmhF18HjCRi2E1rGtwkL+CEM+xpaqB+hJfqdsDh/
Q2tgMpx/LQRbdL4HsgGxx+H3Hnjk2t0Ecm0dgVx7gkCu7QQi/9rbQORf+5BArn1NINd+JJBr
vxPItb+BiFzjsb6otLX2HocZtPdI+dcaBrhG+ddaNnAtXhG4Ft/IwLWumsC1bprAte6qwLV4
2b7lMA3gWnz9gWvxDQRciyeAa11ls3I+izMVIDx8FoMF8LQScG2kEEcvcE0d0DZTBt4JNgBU
5W/AW7wfAW/dVEptllel5snbJi0zNPTIjtkogNzGjf1N4Gp7ccQSITw+rloI3/vuaeH6ir+X
NFqZ+c73Fu9HoFx3lfIq0ygvYz9ROnrKdfN27h4t8LuNeva23rEf5Qr+P9reH/pccd8A43uL
b2Cg3HBYGmjtkx2ZXuXMHcwt8JfkF6lO2Lhx6OggBPcQx6Fmk5uOQ4kxQoKAynVrjEOT8YHm
Li/S8V7AjEPtxFk+DuXNC5orHoEz5WtMwYph8nEo2XpMwjiUNwa88bThVJjwUdc41EyMQ03E
4e04NEEYS7rZWnpRMg5N5O9WuNn6e1EYafL1n88Zem+tgMgP2UHIh4hWrl8bMBrjqPOyUqYr
jDtJmy4dd/KDbV5oZB1WtO5xJyP0fIn1yliUDCJe76w5DMmaZwcR7nTh9ZDhPKYRPyUcK4Gv
rwnENd+tjIBZHamxBuJVT0PR1/XqebxDXx+m6OtmuwKyR2EFZI/CCkiSIvo6qZHR1z1U0ddk
eiNYa8NNPnYooK+TKPqaoq8p+pqiryn6msJkKZyRoq9ptaLoa4q+Dlz0dRJFX1P0NZ4e8rM0
chK4XQF97eUk8DDry/BAXyPc6Exmg8ijiTlE0aRxiKm6TvT1Noy+RtnfEL5BQF+7CfS1g+AQ
PRdUt0yH1Skgq7fh69fQeoBls3D9Ab6+hp3gaXOIIiT5B8ErRJmRRJpjiTR7xSFaI6Cvj8Jr
fZPAJB8mgUkayN4cjUlgrh+QyzdooK8LNJC2t2ikc5YG+nqxH/KwViMPj2jc24Qbu9K9l7BR
ULr3ATCeQ/RzoD7x+kEjD79rlJG/OETVuGND8b0oEAWvIhhdG7XdJIyQeKtBGHrJtlciWQR2
isvF4msRelUFXZuSlJqZwqJre2Vwv0pJz8hEv3IlpfZKdXFXrvSerkw4RIZXqa7MDJh8FJic
4spAIxJXUnJqWjIOzMhMT0MwWig4HQpOyUQHRoSnpCbL0wOfYOL/fkzVoqSWKEcrqJLIQFPL
PlEvrfyiF+VBZIQf8NhJ+G807H1CYC8j2ucboN0pgPblFhg+C9r0xcS9tfDeI/DYBO3kXni8
T9jE/4M24BS89xv8rZRJNBhqI1gBj52E88T3jaj/zSEGkXzfFwLEPisUiH0UP3Dk8dizCDz2
YgKPzfcVaKTA9w08kyiPKtuLr9Fv3gcik+j/4fuozziFf4sGhr/hNCgxiQbjMUQIvkZlrgVx
GWnIXiRFYxu/FylHY/MoGIqEabl7kcmKaOzkRkZjp2iisVM10dg9VdHYybJ9zJEaaOzk+qOx
kxsIjZ1MoLFTZLN0Pos7FXCifBZj8aECAyph+Ej828erio73469TU3cK17vOviJcd53wvnA9
+951wvWhg6uF65v25irG3xO7XLj+9oMnhetOn5/P4q9//TtPUf66klbC9YS7bxeu2352l+Jz
Td1DhOseX3YWrj8aMUm4Pn7hGeE6OfSfRDrfFK4XRicJ15Mcn/bjCzl9ZbZwffHIPOF6/U9P
C9dDw28n4uzpdxacYaSYpNgGgD5Tf+P6P2ZHZa08m2AkmmGo31M3OK28BDO30gQzc4YlVcWw
vOCVYVGB4XmalpcrWvfnr7dedUxoUv17xQrhfz3zsxB+8Ui7/mLTP9xPKU759Cjh+sOOnwvX
vxweQVwfIs2McL3jsVLh+uGHLhWuf7hmj3D9qushwSxtnJlF/PZ54Zpv4uj6603t+4n5vbef
klk9fuEkYaLu8HguINIMCPMGCJnIffbeH8L16/ufoKalhZqWdnhSqrTkEOXQuqtuXqK9NC/R
XpiXnirm5UUN8yK+39JBIe3ORCdhKz1eaUGNqXPHD9c/8NIKwYB8sXXZ52//sUPw7330wVmR
Ra/39yP3M5vUiMQImVmPY5S5n9WjqxeT/15pya5GYZeCHEdH2TwhhHipaZRwNcBhxv3NQHwV
DAaxkOvsUdmVWBbwUhYQZAFBFnvOxumKMTBdMQamq72B6WpvYLouMzBdlxmYrssNTNflBqYr
1sB0xRqSrlasrGBoEFOBT9+0Un7VLBzQRTZikU141SYcmtTW7CJNWfAq2z3WvvZgVk9B4BuQ
AsrhXRO8i7SXAK+mwE4jCCMY1oM7gfg+L/pNVSjfp8nwpZVFbrGvE+9txh0SH24mFlqmwKen
ECJq3HzilSSBmgnuaLZ/5V82uYTDBsBUczLRYk8icb2B/X4o/2ITGetiradLrOP+WvaZJqKT
aiOEhOJl8bagr2qJnOmPL9yi38n2z4mstDSQDjKwhB7XvNJr2+I8920f7Lz+t9/GuyWCaia5
xdWY7WZuSR9JyAS94XBAKQ3Xq0oAWEIPVkJfkAX6gU0sXsTixTKulgPsUj8vKVyHJKU4ZJqc
9ZK0pTJcNsh4hq0bZh3WYzObBlMdsbyTa9MlF8Xe4pbmgfH6WYyuZ3kvN0yX3DCFPJi8fpZJ
17O8lxuuS264LA9MM6hLTDOoS0wzqEumZlCXTM2gLpkCti51qawC4ke3xZHHwuitVx1bMKU/
EuEMEnPN6T+F/YyY9Dfys2delVwVcT2XzSEaXV3J1pIMMI5JYF8I5/x3M+OYRNa/XJhaKLr+
HQXp3PPvwOcV7NkNtrALF2iMkKQ1KAHAlY2wD12wmtJVB0tommINGa+hps5uz4I1qe42eqem
OtQADFBDiIIaMqgaqthBtHyonGdpeyTx/Gv9xcGymhpy3Z6myhsFqKkB1K2GOhoFINWg/Xip
GnprziC2mfXVBl4NjL/UAHSoQU9t6EPVUMXOC5XnjzX9OTXoaxSmOvuPJtAoTApqyDK0NtTP
RDZibejX0tXQrpJ/ySZMeES0OGSutQnZqc7uxC5S2TwGy/z9OIHLheRXc1bGsvFusVywhtpm
2e+ydLB9Yx1h5xbwsmHMM2AZTv7n4GEgIpn4ZRBGNqlDx5mGWnqULL7E4d0oFMSHR4N5EoSV
d1MURqOaON2czqygJvhc2A8hE+3fBF8W/k5IX/vBYHP40ZA8O1rk1K8zV6PoLL6ymk0fA/WA
lmcZvpnAJN2lOlXgG+L17kjExiyRLo9rhbXLAb4B5WAKFHott9keKt61CnuHousqNLlHQSaD
dsFE2SZQ6SBzwX1TWGsRUVjlZSRGN1olugUAAtPGr0JzB/9gK25cVnyAOuLL1E7qqVZ+8PWE
O9BatTsbHvhcnY392XjMzNs5t/hMk7COHe92CapMFq58aRJaK51ik2gb+q+wAdaJ9j6hX4Z1
sPa1dwp9MyzdGohNAsEbEz2aRPpFz9/L19Aj2V80fpNgjGsSTBNoEhs2bAzAJhEKTlja2VHP
Gh7c1871rH3tXM8aOE2CG1tYJfXBKtQed3Y3Nh9peHQSRJQ4juH2Vy8cyo5cHgmeyI5c5kLd
opELOvvP5IyHTaEcVvW7iXOenQvPs/tPv5mNoF+oRZPbejgix5ZnmmLdGhFrKzLdan0gIhjm
OyUI6zfee/2mBHEg/Yatv2I77+hh4xjP0aPwu2jQg83hrbWczVgB781i89kTx+heibCiCay5
TUH07tglsBvO+hEHifgtTDNOWyRbE7alAbYjQhaWe9s4HNvsKdAuz4B/u/tUA0S5WjWgT0hX
+1uhMY6bQ0bYnwz93T43pMB+Z+h/7WINMOuqAeYArAGdAVcDkI6VakAiWwOCJTUA9ZjX5RVW
FBXISzWcLdWjSf4pVVGuVqnmmttad1q2OYrNfax3W1Y7lpvHWOdaKqAKXAxu104ddpMBzlyY
kG3w9+jcFpqvnRbxjMKLYfhqfO4Dw++2iGcUvhyGV+DzGBg+1yKeKxzqpbosyNdSNeN27VBp
10lsqWYB0zKxVNHaDN+gyaY8s6y0ogA16UmzS6YglpOIsoKi/IrCOQUcBQrHux3fpWsiuIKY
snhWhmA2Q41RJd6tfaS2G3Mtc7L2tVobg96c+bT2FxDD+N7QEav+I/A+OqNx7rvwmj+jcBu8
fg2f0fNOwmv+jMJ/ASgN3DkGJ/9SfP6Ufb5ylVht87VK3IKrxO0qVaIHWyVCgIlo6GjR5vpk
3NLrKlyUtIYv3HDwuuUG+5fW4Y5vLYvt/7LGO74MftD+hNUBNeE04/Y+0PvCdZpZnEyAWfFQ
bMUThOLszRZnBBA58xJYKJiEJ99b8+3Aw7IZ8G8xGMZ+h9O/RfqX/XnraVikTscq67uwSDMc
5dbt9SxSfiLqn7PRRWrFRZooFGkftkjDJEWKlk81RlmNXaDt3JUsUnUFs4T7whfIAUWPskLQ
NOB24AzWnm56g9sgl0XhZBpUVlaCI0eOgIkTJ7J+dD5x4gR7HUhxmqOj5UMdddTpcT9UmvEy
7ml25ZPvbHry673UUUed1+40QO8mkYuktc2wd6ZxaBwax/s4Yt9qIvpWqikah8bxpRUF0VZE
49A49WxFZjrPo446H+d5fCuy0FZEHXX1bEXBtBVRR109W1EIbUXUUeeT+8Fd6V4q4EpEgr6n
hBfiuBX9jSxHNceYKHWc350txggFUjYCDs1S4x4degoKGz8nv+hz9IXaSwCY93+nH/hy5D5X
9NurNrddZI5Ykfx9WLufRlxSmnbFG8sGtUo60j1lQ83GrRt7Vp0333Tu2n53v++6YVf+H8fa
Tdjwxj3Vs5++8Pj6iwsuBn395sAbQOWCS8FtoY/dlvZq8ZEjK3uVPLNs3V3vxbo+nfvIiOhf
wObJp+6/sbLbG/2z+753701Mj8LkIf+37LZBT8zM6dMuv9XG97afHOH6e0/wCy8teH/H+d/u
/sedG+8DFxNB7f4xyRcqB28aX/zxisyY+KELP9390srPJnxiWfLsuS079s4+UDXr/RsvTEk3
78jJD/nqv5NmPVHT6mZb/oLSD7ODbkgbceaPhfvG91108u3ytefWdzge9mzXL7ffd9PmV2q+
eyT9zxsvWOdMf/mH3QN6HCrZeD6p7L/Jj4fc12v43uqezyx19nni5Ig/l6T+nOvcOj70/OHY
9hcrdqUeu/72mVNG21Zm7e4xsvULk4//a801vy+Y3+f86Deqwh7ZuO7mXlnX7DFn/fHJieRj
kS/Nn/dN8IxLvxvSNmPRuRszPo9aPOSanvdOn/dkwb+vi5zx0bG3X3pnzOxth9JyUouPxycs
X3b0/NgH9j3Z88GDt/SNnHH4roztWX0fmrs39uD+2107KwafSbonbS38d/1bVzxXm3jTDY8M
WTDj6qtf+PHJX98Y1CUr9+rD9/7aOSu3NOLEoIu1tzGte9+1cnxByZRWmFUuFFYShPRhMd4D
nHlX52UPxx9vKCqYU1BU7jWdHAnOauGukqSTC/Wgkwv1oJPLYLFbWbrp5AQklgadHAOMp5ND
r4fwdHKZQCSC6w3U6OTIWEp0cb2B73Ry6CUylBbf6OT6sdKGgFwwFEt4qtO6H9e/k45j1k0G
15+VMAwMByN8pJNzsxJGgqvBKL/QyemRpBSH0smJsSmdnPfPonRy3tclSidH6eSMqkuUTq7x
6eSGeIw8mgqdXKaMTq53Y9LJ5aoOltD8xKaTRw0EKo/aUKqGKnYQLR8qt0g6ueGaM4gWw6M2
gqqhCnAfTVGaP7YwOrmrDa0NAUsnN6qlq4GjkwsFDUMnF4Hp5E5SOjlQHzo5JuC4sy6FKcik
dHKcswAifYBfhaZ0ct7Rye0P5+jkfgzn6OT+E47o5AKvScTAFPT2ik6OX0O/bmTX4TOKRjdX
OrnGbhKBTCcXgenkTjYInRyiNesM5T9rFc/XY7qz6/1IdzakhdDJGW9yvNPvsEahk9tkcltv
jMixvWuaYs2MiLUdM91qjZPSyTl10ck5G16//qaTy2LNbXcJmRj06YEaBCiPnK6iNwdg0dfF
I9cv4Hjkhpv72nZZ7rTPNE+03WOZal9hnmdbYBlp951HDmFj7rRzGJm+0DDssohnFD4Thk/F
54kw/B6LeEbhK2D4SHyeB8MXWMTzSLt6qfqPR64/W6ouCY8c6hq4NuzBHOcMROq4dbXdmDHM
ydpXa20M+uLuJ7W/sFRt9aGOW4ep48Zgyjj+vA5Txr2Kz8mYMo4/v4op4z7BZ54yrh0+f9Io
1HFuSh0XuNRxl2LDnSkUZ3agU8e9jKnj1mHquMoWRh0Xg4u0t1CkOZrUcWModRyg1GRN3dHy
oY466vQ4Sh1HHXXGOUodR+PQODQOpY6jcWgcSh1H49A4lDqOOuqa2zyPUsdRR51RrYhSx1FH
XX1bEaWOo4463xyljqPUcX6njrPBSoKoAlg890DZ58GvKpqdnUy54/S7OrjjbB7ccZ1Z8NYQ
3dxx4hMbljsOIdR47rgcILK+DQBq3HFkLCVuuAHAd+44hCPsAHzljstlpY0HN4AJWMJ0S9U/
Sw4NxDHrZn4bykq4EdwEbvaRO24YK2EiyAeTKHdcnY5yx0kd5Y6j3HGUO86oukS54yh3XP3q
EsfxMt5j5NFUuONyZNxxAxqTO+4G1cESmqCEhjQkFU4jkqZNoGqoYgfR8qFyi+SOu0lzBtFi
SNNupmqoYueFyvPHFsYdl29obQhY7rhJLV0NHHecDVDuOK1FGN5PueP064wjyoqFKcih3HGc
s3g0I8od5z133HjMHbcIc8dNDVDuuA4wBQO84o7j19ALQekS89mxzZU7rrGbBOWOa+rcZuMp
d5xf9Xtjo3DHvWhyW0dF5Ng+M02xJkTE2n423WqNlnLH6SIZAvENr19/c8cNYc1tgoRATPhM
nZdYgwAlj9NJMBV4ZV8XeVxuwJHHDTGXW3dY8hxF5getd1lcjmXm561zLO0cvpPHDYEJyYO/
R+dyaLh2WMQzCi+C4S58fhCG32URzyh8GQxvh8/Pw/A5FvHczqFeqv4jjxvKlmq6hDwuHf7l
m/JVw8fCRuxBIkc55Jojh9wwyiEXuBxysdh+5wjFOZpyyAU2h1wHXKQDhCIdQznk1BoT5ZAL
EEfLhzrqqNPjKIccddQZ5yiHHI1D49A4lEOOxqFxKIccjUPjUA456qhrbvM8yiFHHXVGtSLK
IUcddfVtRZRDjjrqfHOUQ45yyPmdQy68Lg65FK855BD8iHLIsU7CIRfuwSEX7sEhdymrvev9
wiEXBIznkGsDRA65YUBkfxsO1DjkyFhKHHHDge8cck6A0HW+csiNZ6UVgWJQgiV8HxfzZXZF
Mo5ZNwPcDayEUjATzPKRQ24CK6EM1oYKyiFXp6McclJHOeQohxzlkDOqLlEOOcohV7+6xHG9
FHmMPJoKh9wwGYfc8MbkkCtWHSy1KPK0EqqGKnYQLR8qt0gOuZmaM4gWQ542i6qhip0XKs8f
WxiHXLmhtSFgOeQqWroaOA65cEA55LQWYXg/5ZDTrzOOMMsJUzCMcshxziKbCwFAOeS855Cb
jTnkHsIccksClEMuDqZguFcccvwa+qpZF6+Ijm62HHKN3SQoh1xT5zgrohxyftVvKeWQ81G/
/uaQu14vh1wK5ZALlLKvi0NuPOWQa4Yccjd4wSGXQjnkWgaH3ATKIRe4HHJObL+HCcU5jXLI
BTaHXBwu0uFCkU6nHHJqjYlyyAWIo+VDHXXU6XGUQ4466oxzlEOOxqFxaBzKIUfj0DiUQ47G
oXEohxx11DW3eR7lkKOOOqNaEeWQo466+rYiyiFHHXW+OcohRznk/M4hF0lyyA2W4bqHjx48
knLI+eDq4JCL9OCQu4zV3i1+4ZAjw43ikEPQMZ5DLg+I7G9jgRqHHBlLiSNuLPCdQw5h8NF7
yL5xyM1gpS0Ci0EllrBjuTOkizkFx6ybAa6IlbAE3A6W+sghV8xKWAaWgyrKIVenoxxyUkc5
5CiHHOWQM6ouUQ45yiFXv7rEcb0s8hh5NBUOuTwZh9zYxuSQW6w6WGpR5GmVVA1V7CBaPlRu
kRxyt2vOIFoMedpSqoYqdl6oPH9sYRxyyw2tDQHLIVfV0tXAcchFAsohp7UIw/sph5x+nXGE
WfEwBXmUQ45zFtzkSEc55LzlkFuBOeT+iTnk7gtQDrmuMAVjveKQ49fQ2758ovuQpXnNlUOu
sZsE5ZBr6hxniyiHnF/1u6RROOSeMbmt4yNybIdMU6xpEbG2b023WmMphxyOwVGY3KLFIecl
1oByyDXNsq+LQ25GwHHIjTAvtO62DHfMMj9uvdcS71hp3m1daHHUg0NuBEzIcPh7dF4IDddu
i3hG4bNgeDw+Pw7D77WIZxS+EoY78Hk3DF9oEc+ORuGQK2JLNUPCIZcBRA45rhF7csg5KYlc
MySRK6YkcoFLIhePDXieUJwVlEQusEnkuuIiHSsU6WxKIqfWmCiJXIA4Wj7UUUedHkdJ5Kij
zjhHSeRoHBqHxqEkcjQOjUNJ5GgcGoeSyFFHXXOb51ESOeqoM6oVURI56qirbyuiJHLUUeeb
oyRylETO7yRydlhJugMM7L7KmTvYWVhSUVBWkl9EKeR8dYhCrlaJQm61bUFEX7sdU8iZTCmA
YdCrVSGs9ubUSSG3XEYhJwCxHNwbQkoUcsHAEAo5x0yCQg596pSnkOPziWhIEolrKYUcGUuJ
Ii6xjvtaFHLd4IGqsF4KuVD21eS5rLQ7wAqwEktotemV19tesbN/4o7Hfnr6ra8F+paHH0Lu
JEHnwr2+P4+VcCdYBVbrppDjJMxnJawBd4G7KYVcnY5SyEkdpZCjFHKUQs6oukQp5CiFXP3q
Ekf1cofHyON/Lz8879qeo1kKOW7s0fAUcpUgKCiBESnklgYFBSUyDUQhx2VUyoizQnWw5At3
GghU7rSVVA1V7CBaPtj+x1c//Hvap4M02bK4uO/29zRVPGlYtA9qQO4KiRrMqo3iLyAf1jYA
z5aFUOCTYCqe65GjcXM1StTfApsFqhe8+qM9spWIf2VVHMu7a3g+Cu/6OSN7w/r9gq9cqzTn
ZS2GkW41VUMVO9tWnpU3Y2I+JTXcZWhtCFhivrtbuho4Yj478D8x31LLX9b1EbPsT1uctgUR
iD4ILYtSYj5PJ7KQXR1SHv6QdaK9POTB8NnWvvYbQhaHrwlIFrJuiFaG4VjIxHzXKrCQhf7z
svFT+rzWP25b2fS1p7/o7y0xn8nEMIiFLCiovixkoCGI+eyysMYn5qt062Yhc8xscGK+0bYF
YY+GT7TPsa0Pmxfe136TrSqsOjwQm0R3mIJEjybx1wXP38t3Jrwl5vN3kzCYmK+xm4QnMV8g
NIlQMDK4nR31rIiQj+tZ0Rn1rE4fmoTTiwo9Es4420H56yPEc4GdCy+w+9IkvCOOu6NRiPnQ
yAUR86GRC0fMt7qZEvPd2SjEfK+HfBHaLXyw7dsQYA0O72j7O6Sd9ccwG0nMN1EXMd/Ehtev
v4n55rDmNo4glk9APjCqIL+svLTkynLn5NIyjrKrtCSChXD0GJ49YlRKU+Rtc1m72l+yxTjy
rCPsD9p+txdZC+yLbRI2Pqcupi5n4BV4XWx8cwOOjW+S+XnbQUs7e5X5I9tmy6+R682nbNWW
LyIJNr6Jutj4Jk4yc90LOj8PzcFBi3hG4VUw/NdI7vwRDN9sEc8ofD0M/wKfT8Hwaot4/iJS
vVR9Z+O7DDfjeJVmPM/3ZtxUafcYMLb2Z9CK6QLm1x4CP4IssLb2RfAf4DvtHqLLGwvv/4yG
vgwXzp9R+CF4no/PP6JVDOKMwnfB81p4fhGeUTqyiPPaRqHdmx+otHsZwfPs79oKHROCH7Vv
sg1y5IW8YF9jSyQ52ty6ONrc4FxtrQNlVOU8ARq5R2Hb3mQTz4McXDg61/V74y11N2ypEZaN
K84FbHGSPOIJrG/MgNEcVtKZl5Uyvany7mUEX+pIDrNFTQjOckSEfQfLdKzjN9t7fi7TLCg/
Ikw8f4fL9LtGKdPuuEwThTJdyJapQ1KmyEcgYJtkqZLke1EAk++BfDAZPtkJzyWUiI8S8dHy
oY466rxxlIiPOuqMc5SIj8ahcWgcSsRH49A4lIiPxqFxKBEfddQ1t3keJeKjjjqjWhEl4qOO
uvq2IkrERx11vrmGJeJLN3FEfFfC84q2PBHf567ot2/sN2f7kk/f2v3WTeB0zMaaEUPjc558
cvTa4HFjH173Va837p8x4vT6iW1fbvP8BzP+O/F5d8YVI7+99Z7fTdceGzr2sj615Xct7ne8
82//27V7hSOmqOOU2T/PvPStp9e0Lnf/mXhv8sLprwfNPre4cvlSy7KD/c6n2iePeaj2jsNn
953oZ1uzdfDgR/ZMbneZfc+ArP0dP2pzXfCBr9oe2f7T+E/eaPtJ7ZG8fRvBtqwHI2qeWbb1
1bcmfLb1wMqPTj83vUOXfUP37VsaPufyrWueGr+l4KbKI66tK48XVPWJWfNB+R7n/+1v/eKC
hYP2btwZ2akk9pH357+3IO34uvOtk29r++4v/Z4blHlsTfyYkeu+fCl59ZzdX087Ps5hHnIo
7JmOP17686y9/S8fuqPc9tmUZ797rzuz1Tou9tv+1tcKR311dvVN8x48Nuxg7TvxU5Jf63x8
+YCdzj7/ONx9+/M1C85+2ru0dl/k1Xf8/cew6d+N6Xh+TsHTf8Zes3X0d5P+880A+7+tWf+L
7pCxYnenWRExa+77Lq1bxufbZ1454Loj/Y+8fO6BJ07bSz8/0r3D80Ou7PrbxIxZa//53mtp
WWMzLK8cPXRiyZlOX0y4aaVpxsen12+a+fKD12f8d+28d1zPpj13OPvFy95as2dXu0W9V+Xc
P+C2T0N7vPjYb3uiUwfffFdZYlK3Z++ZtfqRWSOeaVsUM3Xe3riDT1nzH3h39ea2J1M+LHjy
wJSHU+b/Pffngw+s/Ef62V+PHH7svvXf53300a89s0ZcDU9TK2/66sJP1oRN3y7hSP0yKk24
wqG3L0aVld5SMLnCWVgytdSZrEDcR4K6aDvnPrWaQCCsOEgY0g0jaa9yWBdgYV33srAtPa67
u5iFrZkA/3Y2MgK3jiqv/g9T7ODtTAn7tEHzZhaUFRYXlFQ4B+ZXFIBS1qqkpPTokeJKcQEu
OsNGj5RGzx0II7O54iKZ2EgIsDaytKJgUmnpDI8oQWyUULEOSW+b2dsRkscUlEnjWNg4Vk5E
Renk0iLp/WD2PhuAw+8EnXEWTKtr+6Hj0MGD/ZT0JtrgDHcQ+xJWbT0d4/5/AAAA//8DAGwY
2kw=</Template></GraphPadPrismFile>
