# Supplementary material for: Sorting nexin-27 regulates AMPA receptor trafficking through the synaptic adhesion protein LRFN2
Source: eLife journal article supplement (doi:10.7554/elife.59432), 2021-07-12
Supplement: fig4-data2 [file elife-59432-fig4-data2-v2.pzfx]

<?xml version="1.0" encoding="UTF-8"?>
<GraphPadPrismFile xmlns="http://graphpad.com/prism/Prism.htm" PrismXMLVersion="5.00">
<Created>
<OriginalVersion CreatedByProgram="GraphPad Prism" CreatedByVersion="9.1.2.226" Login="nskjmm" DateTime="2021-06-17T15:04:58+00:00"/>
<MostRecentVersion CreatedByProgram="GraphPad Prism" CreatedByVersion="9.1.2.226" Login="nskjmm" DateTime="2021-06-17T15:06:34+00:00"/>
</Created>
<DefGraphButton ButtonID="201"/>
<InfoSequence>
<Ref ID="Info0" Selected="1"/>
</InfoSequence>
<Info ID="Info0">
<Title>Project info 1</Title>
<Notes/>
<Constant><Name>Experiment Date</Name><Value>2020-09-22</Value></Constant>
<Constant><Name>Experiment ID</Name><Value/></Constant>
<Constant><Name>Notebook ID</Name><Value/></Constant>
<Constant><Name>Project</Name><Value/></Constant>
<Constant><Name>Experimenter</Name><Value/></Constant>
<Constant><Name>Protocol</Name><Value/></Constant>
</Info>

<TableSequence>
<Ref ID="Table0"/>
<Ref ID="Table1" Selected="1"/>
</TableSequence>
<Table ID="Table0" XFormat="none" TableType="OneWay" EVFormat="AsteriskAfterNumber">
<Title>Fig 4F mcherry LRFN2 IPs with GFP GLUA1</Title>
<YColumn Width="125" Decimals="6" Subcolumns="1">
<Title>mCherry</Title>
<Subcolumn>
<d>0</d>
<d>0</d>
<d>0</d>
<d>0</d>
</Subcolumn>
</YColumn>
<YColumn Width="180" Decimals="0" Subcolumns="1">
<Title>mCherry-LRFN2 FL</Title>
<Subcolumn>
<d>100</d>
<d>100</d>
<d>100</d>
<d>100</d>
</Subcolumn>
</YColumn>
<YColumn Width="249" Decimals="5" Subcolumns="1">
<Title>mCherry-LRFN2 FN/TM/CT</Title>
<Subcolumn>
<d>17.80458</d>
<d>93.83003</d>
<d>39.31204</d>
<d>25.91503</d>
</Subcolumn>
</YColumn>
<YColumn Width="218" Decimals="6" Subcolumns="1">
<Title>mCherry-LRFN2 TM/CT</Title>
<Subcolumn>
<d>7.998473</d>
<d>37.58626</d>
<d>20.29787</d>
<d>16.23663</d>
</Subcolumn>
</YColumn>
</Table>
<Table ID="Table1" XFormat="none" TableType="OneWay" EVFormat="AsteriskAfterNumber">
<Title>Fig 4F mcherry LRFN IPs with myc GLUA2</Title>
<YColumn Width="125" Decimals="6" Subcolumns="1">
<Title>mCherry</Title>
<Subcolumn>
<d>0</d>
<d>0</d>
<d>13.08879</d>
<d>23.61443</d>
</Subcolumn>
</YColumn>
<YColumn Width="176" Decimals="0" Subcolumns="1">
<Title>mCherry-LRFN2 FL</Title>
<Subcolumn>
<d>100</d>
<d>100</d>
<d>100</d>
<d>100</d>
</Subcolumn>
</YColumn>
<YColumn Width="245" Decimals="5" Subcolumns="1">
<Title>mCherry-LRFN2 FN/TM/CT</Title>
<Subcolumn>
<d>41.96143</d>
<d>17.4715</d>
<d>44.2547</d>
<d>27.07941</d>
</Subcolumn>
</YColumn>
<YColumn Width="214" Decimals="6" Subcolumns="1">
<Title>mCherry-LRFN2 TM/CT</Title>
<Subcolumn>
<d>5.59524</d>
<d>11.23567</d>
<d>7.049607</d>
<d>0</d>
</Subcolumn>
</YColumn>
</Table>

<!--Analyses, graphs and layouts as compressed binary. Don't edit this part of the file.-->

<Template xmlns:dt="urn:schemas-microsoft-com:datatypes" dt:dt="bin.base64">eNrsfQtgVcWZ8HfuvXncvAPhIQqeRFQgkIRXeARIAhhhBRoxQltrIcAFAnlAckNANIlLAavi
JrW22u0q7e62agv1VRV1V+y/VSRqbWu77ra1Wh+A+KCr4gPk/jPnztwzZzLn5My9J/FePAMn
98yZOd/5vm++75vXNzPV86qqLl1aOUXpzACALqVL8aC/a+Crnh/BevTkW14wBBxX0K8HXWmj
0S+6CUAj2A2Xwlzhc09n9cUAPnSXi6516EpC14dK+Gs5JFcIBSBf95FfHBTut6+vucENbnCD
G9zghvgMmejKQlc2U/+7wQ1ucIMb3OCGxAuKywI3uMENbnCDG9zgBje4wQ1ucIMb3OAGN7jB
DW5wgxtiDl7N/+2dwQCHzgFY6gVY5Ov7rczIHXa3W6ookBQeuffBD21++IdfEMHJndglMAX9
0x3/Kpvraust3ilF1xAm3hWepfB6lAICJ+zweMW2hlVNFoDK0DVSCGcQgePRruV1jevWoKvF
BM5UdBUK4XgInLBPZk1dQ6BFXRJoU5c2NdQ2CuEMtsQnLAvLAs1rahtrTem6GIwOGL35k6Q9
mFdbX7equc4STq4lnGTtwYJA/ZZAsG51rc0y72JmlZIrrtOoei8foF27w06q34VUkn410JgS
Fu9QOOYxxLyGmI/EbtLuhqPrNngpJaIgoeixNQbXWdUNbnCDG9zghoEPuGL+Z6Dt46dhi4e2
tNzghoEMnooZWj8mE97QWqavdfq13sWVjZtq65oDa9SgGgy0BNWmtWpV3Tp1SpXasHp9oLl5
m7poadWSSerC6ha1rS64Xr20qlq9dNGVlRMhDcYrxh4gbroqns7Imio3gMajsCnohJlap+d9
xBzcHz5FOPYojCddAj/3LsoZyhV2C6lJmaW9m4auRQSaWVhM0lPVa9HdKIk3nA6zyRq7vZFu
Er7eBooXgL4e0Es4k0S6criPlEo4halOR1cG9Pbsx1wbRDqreaQzPhRdw0h36xx0jUDXueg6
j3Syy0ElX/QQDCA5LyLXKsGsQoNfU7uqtb62WW0OtLTWB1uYdyMhVe8QeiLvalDFmT0ymb0y
mX0ymZNkMifLZE7pK7NCLhUVGS7ksaSwdbZf0hKsa6gN1jU1qtX1TUGTD/nFH0pTRZnTuMzp
qkXmdJnMGTKZM2UyZ8lkzpbJnCOTOVcm8yCZzINlMufJZB4ik3moTOZhMpmHy2Q+RybzCJnM
58pkPk8m80hx5ipYgAxMcqoP1Cy3beAGN5xNXV1R1zbaVuIK1GxZobX67OR+vyNefylPVpCW
7AoSJ02njmgvDOMlDdI9kf6DVb+LnSOw94ZH+g2v9BsuVi5WLlYuVi5WLlYuVi5WLlYuVl8W
rDLVG8hodCYz+ImH60aTUexZZJR+NBj3rMOuXA3ztOmZCeHpmaolxTWLi+fVqFtailQuaVGE
uhU/+HMt/LK7nPbVkhmqZ1S8RiaIVsLt7ehb7UaOPKzocxnQB5VO9ytZD7lfogeFDB7bzkW4
DQJQL1lchXNjvI97AXinxM4UgOno4VT07j4uLfURHxz6Vw/kkwHnXDKrQGcachj607n4UJJ3
OJlxyCA4DyH3XjJTwbq7jSL5ed6eA5FRY7iQ3GPUcQmuseABfT8fTrAUl4vvxYH9HuUDSw99
RnE8ceKEp4bIJ9/X11A72Fn57oWdlew3FoE+zYHjj6OMM8lzHhamcQaVTxNYg0xgXUz4S1l0
8NfPelgaFYYOnBYtHQfIB6zosANrkAkstkzGMLgX6HISEpXVUP09WIquTWTPy/c4nX2CGDDs
L7kYrgAVXbXQCC3aXQCaoQ7WEpinBWM5JYvKLzvNlEFnWfrWDsYo9nYMziF/u8I2J+8SDc55
iKCcS3KgOn1uJJ4/V4GVGZnfxPAWZGy6Gv9W54e/R8tTh9plsEk0sTo9X/N/zKjcdvvnHXqc
D8eLyu5g8z9zYBx83KGn9+w9/n38/iby/RfJLzDfWbMlPFfFyhjlvUfAe+q06fLeed57GHu1
iimPXOb+MsYmJzH22sfdo0pFm2HCsGqWVFcno5cvR/evknqb1tcXMXEahpOrGl0luIzQtZKk
7YL3IuljmLxKHzvaYDanhEIrso2/5eQX0G85+aXxbPSbW4yujlAoFb+PfleUk9/Q2/dCx0EE
FxF0Nfqd3hmm7yGvHH2jEdpBdFUQAXgabjChL7UXTeUcfW8+MBveemgWumbD3x6tgjcemAXH
HlsARx6uhDcfnIWuMjh+oBLeQvfHn1gMp/64HT7sWQdvoPiRR+bCO/9ZjfIvhNBfboDQn3fD
B8+uhg+fWw+f/HYzgo3yPDwXPnp+I3zyYjM8dWcAymtOwkfP1cGZP30LwZ4Nd3d1QkXNR+g6
CZ/+rhWOPXoJvPtsEM6cPgl//dvncNc9n8GTT5+Gdw/WwPH/WgenPz4GJxCeHzy7Co49eRWc
+r+/wN+f/ia88kA1/OJnv4GOPZ/Cywe2wzPPvAUPPXEK7n3wFNy29zM4c+okovcMHP7NaVBw
GN074MejRhcWFpaWFRbOLCU3ZaPD+dE1rlBRxo4jN4Ukv/i5guGMm1lYOGMcuSkj+cdxoTRK
+Gb5zeCPHTt23IyxY+eMIzczreFfMKto0tTps43PfcrIgosnTJwybbqBrjS/359/0fiSyVOm
st8t9g8anqXm5eWVTJxkgOPPHZaHw/gJRUb4af4L8fOLLh5jeO4bcT5+rOYXXMCW1zkjzs3L
G3JeXpZ/pDKK+acMzsobMtQ/bLhfMYT0jMys7NSc3EF+nzEhWUlJ9St+f5rCBY8X50zinvJ2
KkUxthPYeml4pH1wMNIWnUjsIG6HjGTaEArXtjiXa8uybQ3c9rkbXfcTWNOU8Kwx2/ahadlc
O4ltK+H2/pWoLtyEasQ6VBMGUOtXhaB2BVANGYSwD0QGudIJzBTmWTLoXkNJ5FkaubeiAdcL
FcRe47wq0zfLsegP0ThbBw1n4LJ8Hkn4PDVGPj9CYE1EL0zh+EzT+uJzDeLxKmhFfaxaxGlV
43aLFg9CC8O3dHL5SJzlbzrpJ9F06svWn3xmZXsMw/Mx/dRnwWEmwXe5oK2P04rRtcxGn0UE
a6D6LPTbigUdIEkHC8sJHIsteF0syWsRLCf5iOGWWcjDTEl5KHMYx2UWMrtMUmZ5WDL9U16+
j95wg6l847REprkZ/e71hektZ75H48Mj4z8hpa/xGtptxLYa2/i9pHOXQ+zkGNDvFWRFveLO
H4ZE/59VYfXq1e2BQCC0YcOG0MaNG4UXTreCsXbt2vbNmzeH2traQlu3bu11NTU19ck29P32
1tbW0Pbt20PXXnut4WppabHF9sbGxvZrrrkm1NnZGbr++usjF8bBLj8QDu34/V27doV2796t
Xe3t7VLFjmhox+/fdNNNoZtvvjm0Y8cOabFBeLfjd7u7u0M33nhjVGK3c+fO9q6urtCePXui
Flv07fZY3scBvd9+NukMOyb4jsWYYKU2ClWr2Z7JJUO1cRkfMy5vZ1yKD9U7uXH5HfvWdBhG
lJ67CsfHT2/6wecdepxm6SL5eTgPvj35djb/HQvKcRMTDj10lzaO9ddhaf8Sxul5LT39QBh+
FqmRphM4J155XUs//p23v4/ja7pv0d6/L6VZy//YkLS7MRw6LnViQZjeBftfvYqlY+uZT2tF
Y4JDmf4J3z49eehQTPXeclJXBQX13nJSD7XYrPd4WLT+9pjU3x4H6+/lBEczOkCSDhaWEzgW
W/C6WJLXIlhO8bHFQh5aJOWBhyVqB3lM2n60H/xIQ4OGQw2B+3UIjw9s5nAYTtIU8i2fQCar
SV86nfumlX7F2v8Lku93C/gZJPzssslPHhavX3z/z+NgnyBIcDSjAyTpYGE51f8z43WxJK9F
sJziY5eFPHRJygMPKxr92rFzj0G/2oh+3SLQrzaBfrF8wvo1aYD1q5t8f7+An92En/ts8pOH
NZD61U1wNKMDJOlgYTmlX2a8LpbktQiWU3zcZyEP+yTlgYflhH59l+jXzwT69V2BfrF8wvo1
eYD1az/5fo+An/sJPw/b5CcPayD1az/B0YwOkKSDheWUfpnxuliS1yJYTvHxsIU8HJaUBx6W
E/p1P9GvQwL9ul+gXyyfqsl42UDqVw/5/lEBP3sIP4/Y5CcPayD1q4fgaEYHSNLBwnJKv8x4
XSzJaxEsp/h4xEIejkjKAw/LCf16gejXmwL9ekGgXyyfsH5NHWD9OkrnC5Xe/DxK+OlT7PGT
hzWQ+nWU8NaMDpCkg4XllH6Z8bpYktciWE7xEX/fTB5wmow88LCc0K/jRL88Sm/9Oi7QL5ZP
WL9KB1i/kggPCgT8TCL8zLfJTx7WQOpXEsHRjA6QpIOF5ZR+mfG6WJLXIlhO8THfQh7yJeWB
h+WEfqUS/6LzBfqVqvTWL5ZPWL+mDbB+FZDvlwv4WUD4WWiTnzysgdSvAoKjGR0gSQcLyyn9
MuN1sSSvRbCc4uMcC3mwC2uQCSwn9OtCol+FAv26UKBfLJ+qyZxausk3qT/c44rYf66vubJY
dJF+s94b9pGLhfciWAOli4+T8nGKDh6WjAwNFM0bvc6VnQhWrHpjhcOtHn2jM6o3vPxgvVGJ
zLPfZNeSvGOxliQR5uxTZ4d/Pdz7dM7+t6RcnnmQwottzr4xN+330c7Zs368Bw8e7GWHMMti
0d+RpOxnOqC/PCyqk14TnfQ6qJNO0SGCJdJJr0W7jfW7ZusTJ/0t6Do9jOdyB8qOh8WXHe9v
4XXIT4D9dpmDdJQ56MuA4S5zkNc8LDvyxddz/V0uG73OyZcIlqxOWfly9FXnzRbUeSw+ZnWe
aD2fU3Z3Ofl+0AF54mHxMkKrOlZG4lHm8JqUZof4IoIVjzRv8Orl1xojzSJYMnoGxrrLM1RQ
j3ls3ke7rmi6Yk33UyjyNVI+VJ+fIjqw1hv2E8NHNVWhVug6pNVT0J0KDbAa1murmpthG4ov
gqXo+RKYhO4XIv3Hq57b0BtBlEuFS1Fatfa7CK6ESpgInZV0PW466GuOqG3C9KSBvk4phVxp
TF66XiyTgZFM4jRfNvlGMvMsh3mPxtNJnMKy4qlZ2Tptz4JE7rodsGc8rP62Z5+98pKpbuO0
WPjS5SBfeFix0Pzuzt2mNOO0WNoNTsmCCJYMzU7JdjfBYb8DZcjDSmTZ3ucgX3hY8SrbTsmC
CFai1dUvQt919a3kPbau7iZ1NS7zrehqgHlM7TzBUDvj32L0tcXo7zz0m0PqUlFdm2JR17J1
KL7PJfc0bzzUofuJPPQ4oE88rES2M4cd5AsPK17tjFOyIIKVaHZmpQ07cx+hgbUz+4mdOUzg
bEHt/CLQT29JjhO97yHlc9QB+eZhJbLeH3GQLzyseNV7p2RBBCvR9P7nNvT+eQKD1fseovda
mffZvlgUU5siXvrfR0lZJymx6woPK5FtCParc4ovPKx4tSFOyYII1hfR/04ifC9woAx5WIks
2/kO8oWHFa+y7ZQsiGB9EbJdQHAod6AMeViJLNtzHOQLDyteZdspWRDBSrS23yYbbT+852cy
1/bDdOO2Hy7zr2r+7EXomgjTYLJh7oa9omm/2Z0njsVPEPsyzmTmeFmZoGm/VOztJSWCNVD+
Oey3yyzomClJh5N7lWG4yyx4vUyS1zyseJ1vN5OvaObbZ0ZBc3/5WNA90+h8Il+ey0l5ttgs
Tx5WotatmJYWC760SPKFhxWvck7Lr9UBOedhJVrduhfCa7uwH8Xj6GriypqmZTF1aymnM+uB
7t1aDwFQoRIaNa/fbXCNtl9uBhj3bE3n/B3YvVz9MdbFTtuNIDNXy+tHkPCgy6Z+8LAS2W50
WfClS5IvPKx4pPmAYi4L0diNYAw0OyXb3cz8IF+G3aQM99ksQx5WIsv2Pgu+7JPkCw8rXmXb
TBaike3uKGiOpzrxWlLHYX+FGwGfp9W7TryVlBFbJ7I68w10zUO1aT1qGTSg+lBFsSyursth
5h6z4qS+28/MHfKyv5/Qd9im7POwEtkmHLbgy2FJvvCw4tUmmMlCNDZhfxQ0x5vfAdZx7Fuw
BPCZMr1tAu93UMrpjO53EArFk98B3aeIzvfx8t1DaDhiU755WIms90cs+HJEki88rHjVezNZ
iEbve6KgOR7bAti34Nvoel2g988L2gKszvRuC8y1bAtkxolNOMrMk/Kyf5TQZ2dPGxGsRLYJ
mGYzvuA0Gb7wsOLVJpjJQjQ2gYf1RfR9kxR9npQvwyRShvk2y5CHlciynW/Bl3xJvvCw4lW2
zWQhGtlOioJmUb3Gn53KPrdzH8tZXrj+wme2PYV+Rym96zucls3Vd6zORHtmWioY19KlML/p
jD+e3brRaZtRQMq2XKAbBYp+FrId3eBhJbLNmGPCF1n9EcGKV5tR4BDNIljR2gxPHLSXu4g9
wP4Ye6C3PtC0dM5+UP3B5Y/PF1fJP7z2dos2m9SKbIe+VpZdM5sMxjP/0hzy5WDvsb3KI/lz
yL1f8zq4snFTbV1zYI0aVIOBlqDatFatqlunTqlSG1avDzQ3b1MXLa1aMkldWN2ittUF16uX
VlWrly66snIiQhRvM7UUle0iny424OkcsCPtEyHoRy52wkyN+bkQ0gr+FOHYozAe9KMe2ZBL
Lj6UaQaDAp6lvZ9GRDJkERaT9FQVdwxHSbzhdJgNIzRVVRiD42Hu98ICosoehlIzaJ4+0udo
SobhjIK3gdIOBLKHGCgf6AdxphCj7GcUkjrNY2XKJoqUSwzMYKJUQ4hyDiOKiQ32CKLMeFMw
vCFPubZFh5elLTkvgr9KMKvQ4NfUrmqtr21WmwMtrfXBFubdSEgNw2D5UBGGKs7skcnslcns
k8mcJJM5WSZzSl+Z6emoKioyXMhjSWHrbL+kJVjXUBusa2pUq+ubgiYf8os/lKaKMqdxmdNV
i8zpMpkzZDJnymTOksmcLZM5RyZzrkzmQTKZB8tkzpPJPEQm81CZzMNkMg+XyXyOTOYRMpnP
lcl8nkzmkeLMVbAAGZjkVB+oWW4bxA1uOFuCwhuBPtp+fYUVqNmyQmv12cn9fke8/lKerCAt
2RUkTppOHdFeGMZLGqQ7Ituf/kSrCxXdCmsXTv0pXMeUD25snEFAcAVerW6prW8NqGPCHc2x
MQvCih/8uRZ+2V2OyT8TgtzryHMdBYVDIag24zadc7IY+nvLqtU5aRVhFBQBCh4OhaVqy+bW
WtTfdgqFd4fdc/mPN79BuOARoODlUJhft3ZtoDnQuDqgrgoE2wKBRrUhUNvYEjUK5TfnjGp4
47KDYRS8AhR8HAqLmtoCzerqpsa1dWs0ROrrGuqCMXDhxuJ/n/DDjV8lKPgEKCRxKFy5aZOz
KNz95td37H66kKCQJEAhmUOhynFxZEzCmVCyAIUUM6WsckgpWVTOhFIiKNwTGeNgx4YoCqxt
B6k3PNJveKXfcLFysXKxcrFysXKxcrFysXKxcrH6smCVqd5AZrIymYkTPNQ/msyAzSKziKNJ
Gp2yLkRXwzxtCnlCeAq5aklxzeLieTXqlpYilUtaFKGOdusVptdEqX6tYkanR5uBe0Oj67XO
fprEVtxJbOEkthKZxH4fMSfL1iT2+6Sv2XsS29drAntJHwN5X+k1gW33DecnsMOKtVcb+qIT
1e7ksju5zE0uj3Mnl93JZXdy2Z1cdoMb3OBOLruTy6LJZXHXVFQ+1p1ZPnik3/BKv+Fi5WLl
YuVi5WLlYuVi5WLlYuVi9WXBKlPdSUajs5jBzxxmgmgGuhYKJojG9JogspgdooPZ8y5bO/Jq
5b05otmhGRWvkdmhldDVDpDabmTHwwq7Gg8GbIIHf7KeidOF1jRsOxfhNghAvWRxFc6N8T7u
hcj0CA2dKQDT0cOpZJM2w2DVIz449K+eyKLxXDKlQKcZchj607k4XUw6HIyLZYeAvng3DYyL
UUeR/Dxv2cXq7EJgPL+3xoIH9P18OMFSXC6+Fwf2e5QPLD1ObmhOZYcewC1aRI1pnAF9L6gX
waKLwSmL+A3NFXBms/AD5ANWdMgsBudhiRaD42yiBfBsWbELnJeiaxNZiP0ep7NPEOvl9SgF
i+EKUNFVC43aMchXaAcl1cFaAvO0YCCnZFH5ZaeZMui8OH1rB2MRfb2kLIf87QrbnLzdGpzz
EEE5u3OgbuQdkXj+HfirG7ZheAsyNl2Nf6vzw9+j5alD7TLYJJpYNzJfA5hRue32zzv0OI/V
8aKyO9j8zxwYBx936Ok9e49/H7+/iXz/RfILzHfWbAlPVLEyRnnvEfC+S3F531+8ZzeRX8WU
Ry5zfxljk5MYe+3j7lGlok0vYVg1S6qrk9HLl6P7VyE8Y0e9OS5i4jQMJ1c1hDe46AT9EMNd
8F4kfQyTVzHUusLBVEgJhVZkG3/LyS+g33LyS+PZ6De3GF0doVAqfh/9rignv6G374WOgwgu
Iuhq9Du9M0zfQ145+vDGDkF0VRABeBpuMKEvtRdN5Rx9bz4wG956aBa6ZsPfHq2CNx6YBcce
WwBHHq6ENx+cha4yOH6gEt5C98efWAyn/rgdPuxZB2+g+JFH5sI7/1mN8i+E0F9ugNCfd8MH
z66GD59bD5/8djOCjfI8PBc+en4jfPJiMzx1ZwDKa07CR8/VwZk/fQvBng13d3VCRc1H6DoJ
n/6uFY49egm8+2wQzpw+CX/92+dw1z2fwZNPn4Z3D9bA8f9aB6c/PgYnEJ4fPLsKjj15FZz6
v7/A35/+JrzyQDX84me/gY49n8LLB7bDM8+8BQ89cQruffAU3Lb3Mzhz6iSi9wwc/s1pUHAY
3Tvgx6NGFxYWlpYVFs4sJTdlo8P50TWuUFHGjiM3hSS/+LmC4YybWVg4Yxy5KSP5x3GhNEr4
ZvnN4I8dO3bcjLFj54wjNzOt4V8wq2jS1Omzjc99ysiCiydMnDJtuoGuNL/fn3/R+JLJU6ay
3y32Dxqepebl5ZVMnGSA488dlofD+AlFRvhp/gvx84suHmN47htxPn6s5hdcwJbXOSPOzcsb
cl5eln+kMor5pwzOyhsy1D9suF8xhPSMzKzs1JzcQX6fMSFZSUn1K35/msIFjxfnTOKe8nYK
b9QkOmBDAXbTk4ORtuhEYgdxO2QkxLaJ1P0E1jQlPGXMtn1oWjbXTmLbStFuIpXCPEsG3WUo
iTxLI/dWNOB6oYLYa5xX5TpmZv0hGjfZkMfA55GEz1Nj5PMjBNZE9MIUjs80rS8+hw9vaEV9
rFrEaVXjdosWD2oHPFC+sYc4pHH8TQfjJjzUka0/+czK9hiG52P6qc+Cw0zQD4Hh2/o4rRjs
HQwkgjVQfRb6bcWCDpCkg4XlBI7FFrwuluS1CJaTfMRwyyzkYaakPJQ5jOMyC5ldJimzPCyZ
/ikv3/whP6x8x3LITzzQ3Ix+9/rC9JYz36Px4ZHxn5DS13gN7TJhW41t/F7SucshdnIM6PcK
sqJececPQ6L/z6qwevXq9kAgENqwYUNo48aNwgunW8FYu3Zt++bNm0NtbW2hrVu39rqampr6
ZBv6fntra2to+/btoWuvvdZwtbS02GJ7Y2Nj+zXXXBPq7OwMXX/99ZEL42CXHwiHdvz+rl27
Qrt379au9vZ2qWJHNLTj92+66abQzTffHNqxY4e02CC82/G73d3doRtvvDEqsdu5c2d7V1dX
aM+ePVGLLfp2eyzv44Debz+bdIYdE3zHYkywUhuFqtVsz+SSodq4jI8Zl7czLsWH6p3cuPyO
fWs6DCNKz12F4+OnN/3g8w49TrN0kfw8nAffnnw7m/+OBeW4iQmHHrrrmzj+12Fp/xLG6Xkt
Pf1AGH4WqZGmEzgnXnldSz/+nbe/j+Nrum/R3r8vpVnL/9iQtLsxHDoudWJBmN4F+1+9iqVj
65lPa0VjgkOZ/gnfPj156FBM9d5y0A8b4+u95aQesnOgnwgWrb89JvW3x8H6eznB0YwOkKSD
heUEjsUWvC6W5LUIllN8bLGQhxZJeeBhidpBHpO2H+0HP9LQoOFQQ+B+HcLjA5s5HIaTNAX0
jWJ5mawmfel0EG+Om9wP/b8g6Aee8fwMEn522eQnD4vXL77/53GwTxAkOJrRAZJ0sLCc6v+Z
8bpYktciWE7xsctCHrok5YGHFY1+7di5x6BfbUS/bhHoV5tAv1g+Yf2aNMD61Q364WE8P7sJ
P/fZ5CcPayD1q5vgaEYHSNLBwnJKv8x4XSzJaxEsp/i4z0Ie9knKAw/LCf36LtGvnwn067sC
/WL5hPVr8gDr137QD+ni+bmf8POwTX7ysAZSv/YTHM3oAEk6WFhO6ZcZr4sleS2C5RQfD1vI
w2FJeeBhOaFf9xP9OiTQr/sF+sXyqZqMlw2kfvWAfuAVz88ews8jNvnJwxpI/eohOJrRAZJ0
sLCc0i8zXhdL8loEyyk+HrGQhyOS8sDDckK/XiD69aZAv14Q6BfLJ6xfUwdYv46CfugWz8+j
hJ92Dl8TwRpI/TpKeGtGB0jSwcJySr/MeF0syWsRLKf4iL9vJg84TUYeeFhO6Ndxol8epbd+
HRfoF8snrF+lA6xfSYp+QBXPzyTCz3yb/ORhDaR+JREczegASTpYWE7plxmviyV5LYLlFB/z
LeQhX1IeeFhO6Fcq8S86X6BfqUpv/WL5hPVr2gDrVwH5vujgsALCz0Kb/ORhDaR+FRAczegA
STpYWE7plxmviyV5LYLlFB/nWMiDXViDTGA5oV8XEv0qFOjXhQL9YvlUTebU0k2+Sf3hHlfE
/nN9zZXFoov0m/XesI9cLLwXwRooXXyclI9TdPCwZGRooGje6HWu7ESwYtUbKxxu9ei7nFG9
4eUH641KZJ79JruW5B2LtSSJMGefOjv86+Hep3P2vyXl8syDFF5sc/aNuWm/j3bOnvXjPXjw
oKMHyz5OfK1x2c90QH95WPyhqLxOeh3USafoEMGSORQ1GYx+12x94qS/BV2nh/Fc7kDZ8bD4
suP9LbwO+Qmw3y5zkI4yB30ZMNxlDvKahxXLQcP9VS4bvc7JlwiWrE5Z+XL0VefNFtR5LD5m
dZ5oPZ9Tdnc5+X7QAXniYfX3gd79JXN4TUqzQ3wRwYpHmjd49fJrjZFmESzZA72/6EO8pyvW
dD+FIl8j5UP1+SmiA2u9YT+xHwJeN1sH65BWT0F3KjTAalivrWpuhm0ovgiWoudLYBK6X4j0
H696bkNvBFEuFS5FadXa7yK4EiphInRW0vW46aCvOaK2CdOTBvo6pRRypTF56XqxTAYGPVOK
5ssm30hmnuUw79F4OolTWNEcNu60PQsSuet2wJ7xsPrbnn32ykumuo3TYuFLl4N84WHFQvO7
O3eb0ozTYmk3OCULIlgyNDsl290Eh/0OlCEPK5Fle5+DfOFhxatsOyULIliJVlcfhL7r6lsh
vJc6W1d3k7p6H/H5bIB5TO08wVA718BiKEbpNehvDqlHRfVsikU9i+O55J6mx0OduZ+Uf48D
+sPDSmS7cthBvvCw4tWuOCULIliJZldW2rAr9xEaWLuyn9iVwwTOFtSuLwL9qJbkONH7HlI+
Rx2Qbx5WIuv9EQf5wsOKV713ShZEsBJN739uQ++fJzBYve8heq+VeR/tiSoUi6UdES/97aOk
rJOU2HWFh5XINgT70TnFFx5WvNoQp2RBBOuL6G8nEb4XOFCGPKxElu18B/nCw4pX2XZKFkSw
vgjZLiA4lDtQhjysRJbtOQ7yhYcVr7LtlCyIYCVa22+rjbYf3uMzhWv7Ybpx2w+X+TcAH0da
gvp8Jdq/iUybjc7DsFc07Ti788Ox+AdiH8aZzNwuKxs07ZeKvT2kRLAGyi+H/XaZBR0zJelw
co8yDHeZBa+XSfKahxWv8+xm8hXNPPvMKGjuL98KulcanUfky3M5Kc8Wm+XJw0rUOhbT0mLB
lxZJvvCw4lXOafm1OiDnPKxEq2P3QnhNF/afeBxdTVxZ07Qspo4t5XRmPdA9W+shACpUQqPm
7bsNrtH2yc0A416t6ZyfA7uHqz/GuthpuxFk5mh5/QgSHnTZ1A8eViLbjS4LvnRJ8oWHFY80
H1DMZSEauxGMgWanZLubmSfky7CblOE+m2XIw0pk2d5nwZd9knzhYcWrbJvJQjSy3R0FzfFU
J15L6jjsp3Aj4EO0eteJt5IyYutEVmdwv3Meqk3rUcugAdWHKszX6lC2rsth5iCz4qS+28/M
IfKyv5/Qd9im7POwEtkmHLbgy2FJvvCw4tUmmMlCNDZhfxQ0x5v/AdZx7GOwBPBZMr1tAu9/
UMrpTLz6H9D9iei8Hy/fPYSGIzblm4eVyHp/xIIvRyT5wsOKV703k4Vo9L4nCprjsS2AfQy+
ja7XBXr/vKAtwOpM77bAXMu2QGac2ISjzHwpL/tHCX129rIRwUpkm4BpNuMLTpPhCw8rXm2C
mSxEYxN4WF9E3zdJ0edL+TJMImWYb7MMeViJLNv5FnzJl+QLDyteZdtMFqKR7aQoaBbVa/yZ
qexzO/exnOGF6y98VttT6HeU0ru+w2nZXH3H6kzfZ6UFhWelpYJxDV0K85vO+OXZrRudthkF
pGzLBbpRoOhnINvRDR5WItuMOSZ8kdUfEax4tRkFDtEsghWtzfDEQXu5i9gD7JexB3rrA01L
5+wH1R9c/vhccZX8w2tut2izSa3IdtRG1siya2WTwXjWX5pDvhzsPbZXeSR/Drn3a14HVzZu
qq1rDqxRg2ow0BJUm9aqVXXr1ClVasNq7dB7NXzo/cLqFrWtLrhevbSqWr100ZWVExGieHup
pahsF/l0sQFP54AdZZ8IQT9qsRNmaszPhZBWgZwiHHsUxoN+xCMbcsnFhzLNYFDAs7T308jQ
TsgifIWkp6q4YzhK4g2nw2wYoamqwhgcL3O/FxYQVfYwlJpB8/aRPkdTMgznfHgbKO1AIHuI
gfKBfgBnCjHKfkYhqfM8Lrtsoki5xMAMJko1hCjnMKKY2GCPIMqMNwPDG/GUa1tzeFnakvMi
+KsEswoNfk3tqtb62ma1OdDSWh9sYd6NhNQwDPyuJ/KuBlWc2SOT2SuT2SeTOUkmc7JM5pS+
MtNTUVVUZLiQx5HC1tl+SUuwrqE2WNfUqFbXNwVNPuQXfyhNFWVO4zKnqxaZ02UyZ8hkzpTJ
nCWTOVsmc45M5lyZzINkMg+WyZwnk3mITOahMpmHyWQeLpP5HJnMI2QynyuT+TyZzCPFmatg
ATIwyak+ULPcNogb3HC2BIU3An20/foKK1CzZYXW6rOT+/2OeP2lPFlBWrIrSJw0nTqivTCM
lzRId0S2Pf2JVhcquhXWLpz6U7iOKR9ses8gILgCr1a31Na3BtQx4Y7m2JgFYd5la0derbw3
B5N/JgS515HnOgoKh0JQbcZtOudk8RdVOw4uaB9bEUZBEaDg4VBYqrZsbq1F/W2nUGj9+dqe
yj+/Vx5GwSNAwcuhML9u7dpAc6BxdUBdFQi2BQKNakOgtrElahSWVV1w17BXrjgYRsErQMHH
obCoqS3QrK5ualxbt0ZDpL6uoS4YAxe+kveV5zfvX05Q8AlQSOJQuHLTJmdRuHrrx5v+I7Oa
oJAkQCGZQ6HKaXFkTcKZULIAhRQzpaxySClZVM6EUiIo3BMZ42DHhigKrG0HqTc80m94pd9w
sXKxcrFysXKxcrFysXKxcrFysfqyYJWp7iQzWVnMxAkevR9NfmegayGJK8yUNZ76b5inTSFP
CE8h1ywunlejbmkpUo3PqxZFJsJon15hukyU5NcqZnR6tKm3N7T8r3X6tXXa9maw9Qnshm2r
tQnsSSYT2Io7gS2cwFYiE9jvI+Zk25rAfp/0M3tPYPt6TV5X9zGId3mvyWu7bzg/eR1Wqr3a
sBedpHYnlt2JZW5iudCdWHYnlt2JZXdi2Q1ucIM7sexOLIsmlsXdUlH5WHdk+eCRfsMr/YaL
lYuVi5WLlYuVi5WLlYuVi5WL1ZcFq0z1BjIanW0yOTQLwusk+cmhwl6TQ1VLii3mhyh1KcPf
fCxpb1K5aH5oRsVrZH5oJdzejr7VbuTIwwq7GA8GbI4Hf7KeidN11jRsOxfhNghAvWRxFc6N
8T7uhcgMCQ2dKQDT0cOpZI82w3jVIz449K+eyJrxXDKrQGcachj607k4XUs6HIxrZYeAvnY3
DYxrUUeR/Dxv2bXq7DpgXIJrLHhA38+HEyzF5eJ7cWC/R/nA0uPkfuZUdui526I11JjGGdD3
enoRLLoWnLKI389cAWf2Cj9APmBFh8xacB6WaC04ziZa/86WFbu+eSm6NpF12O9xOvsEMWBe
j1KwGK4AFV210KidfnyFdl5SHawlME8LxnJKFpVfdpopg86y9K0djFH09ZKyHPK3K2xz8i7R
4JyHCMq5JAeq0xdE4vkLFFiZkflNDG9Bxqar8W91fvh7tDx1qF0Gm0QTq9Pz8TpYyKjcdvvn
HXqcD8eLyu5g8z9zYBx83KGn9+w9/n38/iby/RfJLzDfWbMlPFfFyhjlvUfA+y7F5X1/8Z7d
Q34VUx65zP1ljE1OYuy1j7tHlYo2w4Rh1Syprk5GL+OZ8VchPGmXTerni5g4DcPJhWfa8f4W
naCfZbgL3oukj2HyKoZaVzieCimh0Ips4285+QX0W05+aTwb/eYWo6sjFErF76PfFeXkN/T2
vdBxEMFFBF2Nfqd3hul7yCtHH97XIYiuCiIAT8MNJvSl9qKpnKPvzQdmw1sPzULXbPjbo1Xw
xgOz4NhjC+DIw5Xw5oOz0FUGxw9Uwlvo/vgTi+HUH7fDhz3r4A0UP/LIXHjnP6tR/oUQ+ssN
EPrzbvjg2dXw4XPr4ZPfbkawUZ6H58JHz2+ET15shqfuDEB5zUn46Lk6OPOnbyHYs+Hurk6o
qPkIXSfh09+1wrFHL4F3nw3CmdMn4a9/+xzuuuczePLp0/DuwRo4/l/r4PTHx+AEwvODZ1fB
sSevglP/9xf4+9PfhFceqIZf/Ow30LHnU3j5wHZ45pm34KEnTsG9D56C2/Z+BmdOnUT0noHD
vzkNCg6jewf8eNTowsLC0rLCwpml5KZsdDg/usYVKsrYceSmkOQXP1cwnHEzCwtnjCM3ZST/
OC6URgnfLL8Z/LFjx46bMXbsnHHkZqY1/AtmFU2aOn228blPGVlw8YSJU6ZNN9CV5vf78y8a
XzJ5ylT2u8X+QcOz1Ly8vJKJkwxw/LnD8nAYP6HICD/NfyF+ftHFYwzPfSPOx4/V/IIL2PI6
Z8S5eXlDzsvL8o9URjH/lMFZeUOG+ocN9yuGkJ6RmZWdmpM7yO8zJiQrKal+xe9PU7jg8eKc
SdxT3k7hfZpE52sowO55cjDSFp1I7CBuh4yE2PaQup/AmqaEZ43Ztg9Ny+baSWxbqe89pEC4
h1QK8ywZdK+hJPIsjdxb0YDrhQpir3FeleubmfWHaNxkPx4Dn0cSPk+Nkc+PEFgT0QtTOD7T
tL74HD67oRX1sWoRp1WN2y1aPKid70D5xp7hkMbxNx2Me/BQX7b+5DMr22MYno/ppz4LDjNB
PwOGb+vjtGKwdy6QCNZA9VnotxULOkCSDhaWEzgWW/C6WJLXIlhO8hHDLbOQh5mS8lDmMI7L
LGR2maTM8rBk+qe8fPNn/LDyHcsZP/FAczP63esL01vOfI/Gh0fGf0JKX+M1tNuIbTW28XtJ
5y6H2MkxoN8ryIp6xZ0/DIn+P6vC6tWr2wOBQGjDhg2hjRs3Ci+cbgVj7dq17Zs3bw61tbWF
tm7d2utqamrqk23o++2tra2h7du3h6699lrD1dLSYovtjY2N7ddcc02os7MzdP3110cujINd
fiAc2vH7u3btCu3evVu72tvbpYod0dCO37/ppptCN998c2jHjh3SYoPwbsfvdnd3h2688cao
xG7nzp3tXV1doT179kQttujb7bG8jwN6v/1s0hl2TPAdizHBSm0UqlazPZNLhmrjMj5mXN7O
uBQfqndy4/I79q3pMIwoPXcVjo+f3vSDzzv0OM3SRfLzcB58e/LtbP47FpTjJiYceugubRzr
r8PS/iWM0/NaevqBMPwsUiNNJ3BOvPK6ln78O29/H8fXdN+ivX9fSrOW/7EhaXdjOHRc6sSC
ML0L9r96FUvH1jOf1orGBIcy/RO+fXry0KGY6r3loJ81xtd7y0k9ZOc8PxEsWn97TOpvj4P1
93KCoxkdIEkHC8sJHIsteF0syWsRLKf42GIhDy2S8sDDErWDPCZtP9oPfqShQcOhhsD9OoTH
BzZzOAwnaQro+8TyMllN+tLpIN4bN7kf+n9B0M874/kZJPzssslPHhavX3z/z+NgnyBIcDSj
AyTpYGE51f8z43WxJK9FsJziY5eFPHRJygMPKxr92rFzj0G/2oh+3SLQrzaBfrF8wvo1aYD1
qxv0s8N4fnYTfu6zyU8e1kDqVzfB0YwOkKSDheWUfpnxuliS1yJYTvFxn4U87JOUBx6WE/r1
XaJfPxPo13cF+sXyCevX5AHWr/2gn9HF83M/4edhm/zkYQ2kfu0nOJrRAZJ0sLCc0i8zXhdL
8loEyyk+HraQh8OS8sDDckK/7if6dUigX/cL9IvlUzUZLxtI/eoB/bwrnp89hJ9HbPKThzWQ
+tVDcDSjAyTpYGE5pV9mvC6W5LUIllN8PGIhD0ck5YGH5YR+vUD0602Bfr0g0C+WT1i/pg6w
fh0F/cwtnp9HCT/tnL0mgjWQ+nWU8NaMDpCkg4XllH6Z8bpYktciWE7xEX/fTB5wmow88LCc
0K/jRL88Sm/9Oi7QL5ZPWL9KB1i/khT9fCqen0mEn/k2+cnDGkj9SiI4mtEBknSwsJzSLzNe
F0vyWgTLKT7mW8hDvqQ88LCc0K9U4l90vkC/UpXe+sXyCevXtAHWrwLyfdG5YQWEn4U2+cnD
Gkj9KiA4mtEBknSwsJzSLzNeF0vyWgTLKT7OsZAHu7AGmcByQr8uJPpVKNCvCwX6xfKpmsyp
pZt8k/rDPa6I/ef6miuLRRfpN2u9YR+5WHgvgjVQuvg4KR+n6OBhycjQQNG80utc2Ylgxao3
Vjjc4tE3OqN6w8sP1huVyDz7TXYtyTsWa0kSYc4+dXb418O9T+fsf0vK5ZkHKbzY5uwbc9N+
H+2cPevHe/DgQUfPlX2c+Frjsp/pgP7ysPgzUXmd9Dqok07RIYIlcyZqMhj9rtn6xEl/C7pO
D+O53IGy42HxZcf7W3gd8hNgv13mIB1lDvoyYLjLHOQ1DyuWc4b7q1xWep2TLxEsWZ2y8uXo
q86bLajzWHzM6jzRej6n7O5y8v2gA/LEw+rv87z7S+bwmpRmh/gighWPNK/w6uXXGiPNIliy
53l/0Wd4lyjWdD+FIl+D8HpQqs9PER24yhv2E7sd8LrZOliHtHoKulOhAVbDem1VczNsQ/FF
sBQ9X4LuFiLtx2ue21D+IMqD825DuVW4FOW6EiphUmQtbjro642oXcK0pIG+RimFXGlMXrpW
jJ4XTs8Op3myCfxk5hkLl8bTyXuZEP0Z407bsSCRt24H7BgPq7/t2GevvGSq0zgtFr50OcgX
HlYsNL+7c7cpzTgtlvaCU7IggiVDs1Oy3U1w2O9AGfKwElm29znIFx5WvMq2U7IggpVodfSL
0HcdfSt5j62ju0kdjct8K7oaYB5TK0+I1MqTUO2Lf4vR1xajv/PQbw6pR0X1bIqgnqV1NVvv
4vtc0I9yzIiTOnQ/kYceB/SJh5XIduawg3zhYcWrnXFKFkSwEs3OrLRhZ+4jNLB2Zj+xM4cJ
nC2ohV8E+qktyXGi9z2kfI46IN88rETW+yMO8oWHFa9675QsiGAlmt7/3IbeP09gsHrfQ/Qe
l3l9n+2LRTG1KeKl/32UlHWSEruu8LAS2YZgfzqn+MLDilcb4pQsiGB9Ef3vJML3AgfKkIeV
yLKd7yBfeFjxKttOyYII1hch2wUEh3IHypCHlciyPcdBvvCw4lW2nZIFEaxEa/tttdH2w3t9
pnBtP0w3bvvhMv8G4L3LS1Cfr0T7N5Fps9E5GfaKph1nd544Fj9B7Ms4k5njZWWDpv1SsbeX
lAjWQPnnsN8us6BjpiQdTu5VhuEus+D1Mkle87Didb7dTL6imW+fGQXN/eVjQfdMo/OKfHku
J+XZYrM8eViJWsdiWlos+NIiyRceVrzKOS2/VgfknIeVaHXsXgiv7cJ+FI+jq4kra5qWxdSx
pZzOrAe6d2s9BECFSmjUvH63wTXafrkZYNyzNZ3ze2D3cvXHWBc7bTeCzJwtrx9BwoMum/rB
w0pku9FlwZcuSb7wsOKR5gOKuSxEYzeCMdDslGx3M/OEfBl2kzLcZ7MMeViJLNv7LPiyT5Iv
PKx4lW0zWYhGtrujoDme6sRrSR2H/RZuBHyeVu868VZSRmydyOoM7nfOQ7VpPWoZNKD6UEWx
LK6uy2HmILPipL7bz8wh8rK/n9B32Kbs87AS2SYctuDLYUm+8LDi1SaYyUI0NmF/FDTHm/8B
1nHsY7AE8JkyvW0C739QyulMvPof0H2K6LwfL989hIYjNuWbh5XIen/Egi9HJPnCw4pXvTeT
hWj0vicKmuOxLYB9DL6NrtcFev+8oC3A6kzvtsBcy7ZAZpzYhKPMfCkv+0cJfXb2tBHBSmSb
gGk24wtOk+ELDytebYKZLERjE3hYX0TfN0nR50v5MkwiZZhvswx5WIks2/kWfMmX5AsPK15l
20wWopHtpChoFtVr/Nmp7HM797Gc5YXrL3xm21Pod5TSu77DadlcfcfqTLRnpqWCcT1dCvOb
zvjl2a0bnbYZBaRsywW6UaDoZyHb0Q0eViLbjDkmfJHVHxGseLUZBQ7RLIIVrc3wxEF7uYvY
A+yXsQd66wNNS+fsB9UfXP74fHGV/KtG1xZtNqkV2Q59zSy7djYZjGf+pTnky8HeY3uVR/Ln
kHu/Nst9ZeOm2rrmwBo1qAYDLUG1aa1aVbdOnVKlNqxeH2hu3qYuWlq1RF1Y3aK21QXXqw3b
VquXLrqychLCE+8ytRQV7SKfLjXg6RywE+0TIegnLnYifmPe50JIq39OEY49CuNBP+mRDbnk
4kOZZi/oGY+ztPex1FRD7x2J2HA5SU9Vcb9wlMQbTofZMELT1CTG3iQz93thAdFkD6ldwQKT
5D7S50A4Bz7V7W2gtAPhn4fYJx/o53CmEJvsZ/SR+s5jXcomepRL7MtgolNDiG4OI3qJ7fUI
ost4TzC8H0+5tkOHl3xZE4/kvAj+KsGsQoNfU7uqtb62WW0OtLTWB1uYdyMhNQwDv+uJvKtB
FWf2yGT2ymT2yWROksmcLJM5pa/MVHFUVGS4kAtJYetsv6QlWNdQG6xralSr65uCJh/yiz+U
pooyp3GZ01WLzOkymTNkMmfKZM6SyZwtkzlHJnOuTOZBMpkHy2TOk8k8RCbzUJnMw2QyD5fJ
fI5M5hEymc+VyXyeTOaR4sxVsAAZmORUH6hZbhvEDW44W4LCG4E+2n59hRWo2bJCa/XZyf1+
R7z+Up6sIC3ZFSROmk4d0V4YxksapDsiu5/+RKsLFd0KaxdO/Slcx5QPbhKcQUBwBV6tbqmt
bw2oY8L9zLExC0LK8DcfS9qbVI7JPxOC3OvIcx0FhUMhqDbjNp1zsvi1wG0vjZ1xYUUYBUWA
godDYanasrm1FnW3nULhx39Ie/97te8RLngEKHg5FObXrV0baA40rg6oqwLBtkCgUW0I1Da2
RI3CxpfmTXns99UHwyh4BSj4OBQWNbUFmtXVTY1r69ZoiNTXNdQFY+BC1m073kv9ZQ1BwSdA
IYlD4cpNm5xFoevi1A//+MZCgkKSAIVkDoUqp8WRNQlnQskCFFLMlLLKIaVkUTkTSomgcE9k
jIMdG6IosLYdpN7wSL/hlX7DxcrFysXKxcrFysXKxcrFysXKxerLglWmegOZycpmJk7w6P1o
8jsLwjPho5k0IJMqDfO0GeQJeAZ5klq1pLhmcfG8GnVLS5HKJS2KUEe79QrTa6JUv1Yxo9Oj
feMNja7XOvtnDltx57CFc9hKZA77fcScHFtz2O+TrmbvOWw6mqTPXy/tYxzvil7z13bfcH7+
OqxXe7WRLzpP7c4tu3PL3NzyeHdu2Z1bdueW3bllN7jBDe7csju3LJpbFvdMReVj3Zflg0f6
Da/0Gy5WLlYuVi5WLlYuVi5WLlYuVi5WXxasMtWdZDQ6hxn8zGbmh2aga6FgfmhMr/khi8kh
Opj98erLTl0+t3qOaHJoRsVrZHJoJTy6HaBku5EdDyvsYjwYsAke/Ml6Jk6XWdOw7VyE2yAA
9ZLFVTg3xvsPXohMj9DQmQIwHT2cSrZoMwxWPeKDQ//qiSwZzyVTCnSaIYehP52L06Wkw8G4
VHYI6Et308C4FHUUyc/zll2qzi4DxtN7ayx4QN/PhxMsxeXie3Fgv0f5wNLj5HbmVHY2Qnir
aNES6g1E+PtaQi2CRZeCUxbx25kr4MxW4XUkLqKjTpIOESzRUnAMR7T8nS0rdnkznuLbRJZh
v8fp7BPEenk9SsFiuAJUdNVCo3YM8hXacUl1sJbAPC0YyClZVH7ZaaYMKqamb+1gLKKvl5Tl
kL9dYZuTt1uDcx4iKGd3DtSNvCsSz78Lf3XDNgxvQcamq/FvdX74e7Q8dahdBptEE+tG5msA
Myq33f55hx7nsTpeVHYHm/+ZA+Pg4w49vWfv8e/j9zeR779IfoH5zpot4YkqVsYo7z0C3ncp
Lu/7i/fsFvKrmPLIZe4vY2xyEmOvfdw9qlS06SUMq2ZJdXUyehkv634VwjN2tLK+iInTMJxc
eJk43t6iE/SjDHfBe5H0MUxexVDrCgdTISUUWpFt/C0nv4B+y8kvjWej39xidHWEQqn4ffS7
opz8ht6+FzoOIriIoKvR7/TOMH0PeeXow9s6BNFVQQTgabjBhL7UXjSVc/S9+cBseOuhWeia
DX97tAreeGAWHHtsARx5uBLefHAWusrg+IFKeAvdH39iMZz643b4sGcdvIHiRx6ZC+/8ZzXK
vxBCf7kBQn/eDR88uxo+fG49fPLbzQg2yvPwXPjo+Y3wyYvN8NSdASivOQkfPVcHZ/70LQR7
Ntzd1QkVNR+h6yR8+rtWOPboJfDus0E4c/ok/PVvn8Nd93wGTz59Gt49WAPH/2sdnP74GJxA
eH7w7Co49uRVcOr//gJ/f/qb8MoD1fCLn/0GOvZ8Ci8f2A7PPPMWPPTEKbj3wVNw297P4Myp
k4jeM3D4N6dBwWF074AfjxpdWFhYWlZYOLOU3JSNDudH17hCRRk7jtwUkvzi5wqGM25mYeGM
ceSmjOQfx4XSKOGb5TeDP3bs2HEzxo6dM47czLSGf8GsoklTp882PvcpIwsunjBxyrTpBrrS
/H5//kXjSyZPmcp+t9g/aHiWmpeXVzJxkgGOP3dYHg7jJxQZ4af5L8TPL7p4jOG5b8T5+LGa
X3ABW17njDg3L2/IeXlZ/pHKKOafMjgrb8hQ/7DhfsUQ0jMys7JTc3IH+X3GhGQlJdWv+P1p
Chc8XpwziXvK2ym8TZPZdiZjGDs5pp/aeEDaMfTIDL6Nh9OKwd4xKiJYA9XGo99WLOgASTpY
WE7gWGzB62JJXotgOclHDLfMQh5mSspDmcM4LrOQ2WWSMsvDkmnP8/LNH4nCyncsR6LEA83N
6HevL0xvOfM9Gh8e6S+HlL76t7SJiccMpkD4iBPckMsh7b0xoN/jDW284sYyhkT/n1Vh9erV
7YFAILRhw4bQxo0bhRdOt4Kxdu3a9s2bN4fa2tpCW7du7XU1NTX1yTb0/fbW1tbQ9u3bQ9de
e63hamlpscX2xsbG9muuuSbU2dkZuv766yMXxsEuPxAO7fj9Xbt2hXbv3q1d7e3tUsWOaGjH
7990002hm2++ObRjxw5psUF4t+N3u7u7QzfeeGNUYrdz5872rq6u0J49e6IWW/Tt9ljexwG9
33426Qw7hvKOxRhKpdZrr9Vsz+SSoVo/1seMY9rpx/Oheic3jrlj35oOQw/8uatwfPz0ph98
3qHHaZYukp+H8+Dbk29n89+xoBx3ieHQQ3d9E8f/OiztX8I4Pa+lpx8Iw88iNdJ0AufEK69r
6ce/8/b3cXxN9y3a+/elNGv5HxuSdjeGQ/vxJxaE6V2w/9WrWDq2nvm0VjSGQseykgXt05OH
DsVU7y0H/Wgmvt5bTuohO8efiWDR+ttjUn97HKy/lxMczegASTpYWE7gWGzB62JJXotgOcXH
Fgt5aJGUBx6WqB3kMWn70S0pH2lo0HCoIXC/DmEX3M0cDsNJmgL6tpq8TOIxGnz8aTqItxJN
7of+XxD046F4fgYJP7ts8pOHxesX3//zONgnCBIczegASTpYWE71/8x4XSzJaxEsp/jYZSEP
XZLywMOKRr927Nxj0K82ol+3CPSrTaBfLJ+wfk0aYP3qBv2oJZ6f3YSf+2zyk4c1kPrVTXA0
owMk6WBhOaVfZrwuluS1CJZTfNxnIQ/7JOWBh+WEfn2X6NfPBPr1XYF+sXzC+jV5gPVrP+hH
GvH83E/4edgmP3lYA6lf+wmOZnSAJB0sLKf0y4zXxZK8FsFyio+HLeThsKQ88LCc0K/7iX4d
EujX/QL9YvlUTcbLBlK/ekA/HojnZw/h5xGb/ORhDaR+9RAczegASTpYWE7plxmviyV5LYLl
FB+PWMjDEUl54GE5oV8vEP16U6BfLwj0i+UT1q+pA6xfR0E/oojn51HCTztHVYlgDaR+HSW8
NaMDJOlgYTmlX2a8LpbktQiWU3zE3zeTB5wmIw88LCf06zjRL4/SW7+OC/SL5RPWr9IB1q8k
RT/Oh+dnEuFnvk1+8rAGUr+SCI5mdIAkHSwsp/TLjNfFkrwWwXKKj/kW8pAvKQ88LCf0K1UJ
69f5Av1KVXrrF8snrF/TBli/Csj3RccsFRB+FtrkJw9rIPWrgOBoRgdI0sHCckq/zHhdLMlr
ESyn+DjHQh7swhpkAssJ/bqQ6FehQL8uFOgXy6dqMqeWbvJNumZgI3mX+vzbnSuLRRfpN3M9
4V09WN7TtF8S2vvivQjWQOniRtK+MKPjPEk6eFgyMjRQNOd4zMtOVm9EsGLVmzIlvEamQglv
XMPiMEfRd4WiesPLD9Yblcg8+03W9/4dC9/7RJizT50d/vVw79M5+9+SNWXPPEjhxTZn35ib
9vto5+zZYwgPHjzo6DGcuOxHkrKfKdDfkUR/Z9jUXx4Wf4Qkr5NeB3XSjI5odJKHJXOEZDIY
jkA01CdO+lvQdU0Yz+WCsptJym6ZzbLjYfFlx/tbeB3yE2C/XWZBx0xJOsoc9GXYSPwnzXi9
TJLXPKxYjmXtr3LJ8ZjLVzQ6NTMKmkXtL5EvB67zZpM6r0ZQ580W1HksPmZ1nmj9k1N2dzn5
flAgT8uJPLXYlCceVn8ff9xfMofXbDZb8KVZgi8iWPFIc7ZHL7/WGPVMBEv2+OMv+sjjEiXs
j/U1UtZNXFnTtIsYfd5MdCDdE5aN2wGvM6yDdUirp6A7FRpgNazXVoE2wzYUXwRL0fMl6G4h
0n68RrQN5Q+iPDjvNpRbhUtRriuhEiZF1i6mExvBHquOaUkDfevcFHKlMXnp8ez0eGV61DLN
k03gJzPPWLg0nk7ey4Toj2R22o4Fibx1C/Q1SMqwy6Yd42El6jHuG4k/lRlfuiT5wsOKheZ3
d+42pRmnxdJeMJOFaNoLwRhodkq2uwkO+wVl2E3KcJ/NMuRhJbJs77Pgyz5JvvCw4lW2zWQh
GtnujoLmeKqjD5I691Z0zVXwRj2962icNpiro7tJHb2P2PoGmMfUyhMitfIkVPvWwGIoRuk1
BJcskzo2RVDH0noax3PJPU2PhzpzPyn/HoH+7Cf6c9im/vCwEtmuHLbgy2FJvvCw4tWumMlC
NHZlfxQ0x5NdWUnsxH3o+jbgPS9625X7CA2sXdlP7MphAmcLatEXgX6kRXKc6H0PKZ+jAvnu
IfJ9xKZ887ASWe+PWPDliCRfeFjxqvdmshCN3vdEQXM86f3PiR4/j+cA0QuvC/T+eQKD1fse
ove4zOv7aE9UoVgs7Yh46W8fJWXN+5zRNKwrdnzORLAS2YZgms34gtNk+MLDilcbYiYL0dgQ
HtYX0d9OInwvEJRhEinDfJtlyMNKZNnOt+BLviRfeFjxKttmshCNbCfFQLNTsl1AcCgXlGGB
ou9BaqcMeViJLNtzTPgiW84iWPEq2wUO0SyClWhtv62kLYf3Ozwg8PWjaSlc2w/Tjdt+uMy/
AfjYxhLU5yvR/k1k2mx0Doa9omnH2Z0XjsUvsITMS9M5XVY2aNoGsOdnIII1UP447LfLLOiY
KUmHk3uTlRA+mvF6mSSveVjxOr9uJl91kvIlgmWH5v7yqaB7pNF5RL48lxPaWmyWJw8rUevY
EkKzGV9aJPnCw4pXOafl1yqQcyoLQZtyzsNKtDp2L4TXcmG/CbzvPe9TQdOymDq2lNAdIGW+
XoNVC6ugHj1ToRIaNS/fbXANiq+J1LfpnK9EJjPe4iP3/hjrYqftRpCZo+X1I0hkpcumfvCw
EtludFnwpUuSLzyseKS5zkIW6iRlQQRroPuddC8dOk/Il2E3oWefzTLkYSWybO+z4Ms+Sb7w
sOJVts1koU5SFkSwEq1OvJbUcbeSOvEeQZ14Kykjtk7sJnUi5hPud85DtWk9ahk0oPpQhfla
HcrWdTnMHGRWnNR3+5k5RF729xM5OGxT9nlYiWwTDlvw5bAkX3hY8WoTzGShTlIWRLAS0f+g
lPgYLBH4H5QK/A9KCd0BiG//A7ovEZ334+W7h5T1EZvyzcNKZL0/YsGXI5J84WHFq96byUKd
pCyIYCVqW+B50hZ4XaD3zwvaAj1E748I2wJzLdsCmXFiE44y86W87B8lcmBn3lwEK5FtAqbZ
jC84TYYvPKx4tQlmslAnKQsiWF9E3zdJ0edL+TJMImWYb7MMeViJLNv5FnzJl+QLDyteZdtM
FuokZUEES7a+E+0xwj+3cx9tfXc3qb/wmVa4vhul9K7vcFo2V99hugOET9jf7kpUz22CWsST
Zm0MWIWgdgVQ+zfI+NLRseEkUu7s+rkU5jed8cuzWzc6bTMKSNmWC3SjgMhJoU3d4GElss2Y
Y8IXWZ8FEax4tRlmslAnKQsiWNHaDE8ctJe7iD0YTexHocB+jCZnO7P2o4DYjznkPZX8q0bX
Fm02qRWlh0J0jSy7VjaZmTfyMXNKsfpysPfYXuWR/Dnk3q/Ncl/ZuKm2rjmwRg2qwUBLUG1a
q1bVrVOnVKkNq7XDwVV8OLi6sLpFbasLrlcbtq1WL110ZeUkhCfeVWopKtpFPl0CwdM5YCd+
J0LQT0LvRPzGvM+FkPZ7inDs0chh8H7u3Vxy8aFMsxf0EPhZ2vtYapZC7x2I2HAFSU9Vcb9w
lMQbTofZ2g5OHq3epJKTwtzvhQVEkz2kdgULTFL6SJ+j6RjmVg68DZR2IPzzEPvkI1+idXYq
M86VzvjOY13KJnqUS+zLYKJTQ4huDiN6ie31CKLLeA8wvP9OubYjh5d8WROP5LwI/irBrEKD
X1O7qrW+tlltDrS01gdbmHcjITUMA7/ribyrQRVn9shk9spk9slkTpLJnCyTOaWvzFRxVFRk
uJDHk8LW2X5JS7CuoTZY19SoVtc3BU0+5Bd/KE0VZU7jMqerFpnTZTJnyGTOlMmcJZM5WyZz
jkzmXJnMg2QyD5bJnCeTeYhM5qEymYfJZB4uk/kcmcwjZDKfK5P5PJnMI8WZq2ABMjDJqT5Q
s9w2iBvccLYEhTcCfbT9+gorULNlhdbqs5P7/Y54/aU8WUFasitInDSdOqK9MIyXNEh3RHY7
/YlWFyq6FdYunPpTuI4pH1zLn0FAcAVerW6prW8NqGPC/cyxMQvCx6svO3X53Oo5mPwzIci9
jjzXUVA4FIJqM27TOSeLB04+drKhYn5FGAVFgIKHQ2Gp2rK5tRZ1t51C4aoT5//twr+9Xx5G
wSNAwcuhML9u7dpAc6BxdUBdFQi2BQKNakOgtrElahT+53vKumPXLz8YRsErQMHHobCoqS3Q
rK5ualxbt0ZDpL6uoS4YAxeeemenuvXdrxIUfAIUkjgUrty0yVkU/l5x3b6vD11GUEgSoJDM
oVDltDiyJuFMKFmAQoqZUlY5pJQsKmdCKREU7omMcbBjQxQF1raD1Bse6Te80m+4WLlYuVi5
WLlYuVi5WLlYuVi5WH1ZsMpUd5KZrBxm4gQP9Y8mz/AJGgtJXGFmrPHMf8M8bQZ5Ap5BnqTW
LC6eV6NuaSlSjc+rFkUmwmifXmG6TJTk1ypSO8PE+DXgglnqSfo09aVV1do09UTBNLUW/rHC
nabWO2v6NHVnBaRDCZGaNDLtmUbKYyK5cLfuIXR9iq7/hfBWF9e5V9xcJWTK+jpBaacS5cR2
QP1RSuT5Gc11SIF2pI1e5lmhR4Ekr8cwAKtwJgQr1i3wVfJUYQxJGsGCTuVjiGkCY8ZCwjCy
mXc8mhQOZ3JROnHOig48qzmcGyKu2FKhHZKA3w2nKsxVsSm83AVjkxk5XItaoYpWfRAjM+KS
5Y1A1lOzO2cJBj7wb4DhRSrhA8+1sC1L1Q0lMp7JkZQPNFNKBxCpWf0n7UiPFODcvcgzxYSr
aX1YgC5STWRXhClSJCnyGCjK7WX6qxbFRFqOg6R5JElTDKQN603akmKtYouJwKEOEuiNicA8
cbUdE3WDHaHu20Q/9WmIDHUWaZwAN+JP3QAp/azmeZn7VNKmUBDlF4vbFPY838JNLbdJIWxS
gN0mBTbJH6Hrj24VntBNCg/zvEhJhQs8fuEzuSYFraIHuknhY5oU1xmaBQqZWDJvUiQzTYqP
DKlepsrGTYo/ktSwEfdxRlxJ+CZFkiRFCdSkSJYkLeGaFCkxERjvTQoQNikUQZMimdG2JOY+
RdCk8CDK8cqO6uamDYHVQbWucW2TOlGtrwv72K9uamwJ1jYGW0hj4qg3fNHwbx63ESFqTPyb
Vg3xjQm6xKSBudxKO34vII2JBonxCRz2aZdi+YyaBerRDR0eLd57fAJAX0TDjoJQqeqrMcGG
I9r31hP6wrE6Q2yDIbbREKs3xBoMsUZDrMkQ22SIbTbEmg2xFkMsaIi1GmJbDLE2Q2yrIbbN
ELvGENtuiF1riF1niLUbYh2GWKchdr0h9o+G2A5D7FuG2E5DbJchttsQu8EQ+7YhdqMhdpMh
drMhtscQu8UQ+ydDrMsQ6zbEvmOI3WqIfdcQu80Q+54h9n1D7HZD7A5D7AeG2D8bYj80xP7F
ELvTELvLENtriP3IEPuxIfavhti/GWL/boj9xBD7qSF2tyF2jyF2ryH2M0Ps54bYPkNsvyH2
C0PsPkPsfkPsAUPsQUPsIUPsl4bYw4bYI4bYo4bYAUPsMUPscUPsCUPsPwyx/zTEnjTEDhpi
TxlivzLE/p8h9l+G2K8NsacNsWcMsUOG2LOG2GFDrMcQe84Qe94Qe8EQ+40h9qIh9ltD7HeG
2O8NsZcMsT8YYn80xP7bEHvZEPsfQ+x/DbE/GWJ/NsT+Yoi9Yoj91RB71RB7zRD7myH2uiH2
hiH2piH2liF2xBA7aogdM8TeNsSOG2LvGGLvGmLvGWLvG2InDLG/G2L/Z4h9YIh9aIh9ZIid
NMQ+NsQ+McQ+NcQ+M8ROGWKnDbHPDbEzhliIxIyDE7RN23twwk+HEDrCNb7WsdE6balMC4Z2
qAPMvY9p5aRyrRm/Bnce6aMIemrUqfg8YU+N/XQqM7HChwybPbXvRPpnD2vfYTvc2cycdCb5
1nmkeYmxvJjghSEUkW/ivttMhmzaz/X3wbJUS5ZhrJZhd9qY+JXkML/yOFgZEZp7935p33UR
ouYysLs2XDTrPpNfuNq7l5tJvBPcIXPRkLlVL/dxJXzdr7g9ybNtFh4HfBjEO4pi+Yz2clmJ
0Xu5+OlNSm+lp8NofQ2ZpzK9XHb5k90h8wmKXisZ58pZfDMhvInGWtIj9RB0MjjaRpLLH8Y1
B1Yp9LFCOiDI9i0EzgUA71unKhUL6d5CB72vLqDPqz0VXP5OrYF5g3K7lh+TVeHbpN3j5t3t
nke1e6xydyvj/wHffw39qfFkaPfrcGc1vboXzG+gxDHJJ7R3cWNseMrByP3L5P53eN8U33QN
DmZcatonC+k9pH/SC2Ydev5JejgP7uKcyNBxzjlXxxmydJy/kTL+H3g4Gi9zblhIS+T2nKOR
+87cows/gFleY82FOa5yIvMGqTwG9WHeRO/RnVlEaaNI/ShKu9BGXagyVNL3JpKRYxHM+aQN
IUrDu2AMM0nTdsoxScMd8wtM0h6lVaAkDbgzNcoE5utk7FqUdsoibTB6UGyShk/BPt8krZak
ydLQaQHzLsW8jB5QzMvoKcW8jF5WwmUkiyf2eso1gZnnMdeHiSQtFy5Hd4s92j4e9QG1srG2
fts1gTWQpSjzmupbGxrVeZCqKFtaisAbeTQXP+KaXpCtKCoKZMEWpBuiaktrQ0Nt8zZUkNrj
K+rWNdatrVuN2u7129Q1ZMFfUB1Trc5SS4pKpo4th4vDWb/SGJigNjWrwbamCcHaunr0RQK0
HM4PZwmOV9esBb+iLGhqU1eh9l9dixpcH4jAXY2yjghnXRyobQzPbhBK8oTP59HnZmsR1THz
1Anq3LHq/eoVlyyGceHcM6ZeyK7Yq2sMBpoRqnBuODmytlIdEwjW0shYnBxe3qYGm9D7DZvQ
Y0Ric10tgtJC364ar86vakR/1q7pF2bPr0U41VIByCTv1jZsQnLRUndNYLzOtHPME+fhxD+4
YuWKlfNilZuzFInUElesoharX4XlqtCVK1au9LEO3KCnE3CLSec29rGOraRlStugg9C7o9D3
LiQwJqL2xHzUbrgCtQ82oHbAbahN9ihpe/0a5XwdtYtOoWuwUgSVyvmwUgm3aTrQ753KYNR+
zoaDyjD4byXchvB4cmGwZyTqno+Eh2GMAoZO0SBC0yCmwz6KGYO6kPEloO1RnEbbn7jrRdub
ftDbl2mgtyfTQW8/ZoLeJswCvQ2YDXqbD7ffcRuvCMLtmUrS/sI4riT3eRrF4Xu8edGdpB02
lPQgsglOBxV9d7P/Ju0qbS830lbCW/0MJu0f3GcoIfdYZ+g42wRFL3u2E9hCnrHjbDY7gfdr
Mb6TEx7N/aryYqQTuDc13AnEMzArPXsXmokXzlOFb5LVhXR4sSJz7wIK59XMMBw85royZaWW
B8/Rqb4bLGHifny1P2chvX+V3ONO7PSkroUUt0NJexdSHF7MUC1h4ncfTQ6/ezlWjawS7R6P
P1RkQ4T2zvNfXWAFB4eVaphGLeTvXSDXCSyMohNIBUiUdolFJ3AR6FtaRhNEMFcSRTPr6CWZ
pDVZ4LmFKKYo7Vsg3uAxFhpuI4ZDlHanRdpPLTrHjxFei9JesOFyJUvDy8Q4idLeJgZQlPYR
MR6itM85RzYn8MRbxpvJhJ+k5UIuustU7K9YQ9WviUPg0Ejrq7czpKKg2nvitMmQrCjjQFGU
r6HWAspZE2krQZqiBGdPLpo0dTpuJM0uxfX6xBL0GiQpypQpRZMm4ZsJU6cWTZuO2sgTpxVN
nIRbfxNmTCsqnY7bIxMmTi6aPiP8sdLJ6A59bCFq4jTWBbeNVyej/zj/LASypGQipCBMUEBs
oshMwYhpf/7gskXEltycQYglWQnHll9RvmT3D1/EjchMxflGZCH5OwLVPimoltHrmJXIzm1A
Ot2Enm9BNv1bjO2+DdnVO9H1U2S3DqB3nmds4n+jZ8eQzfoQ2abTjA3yKkmo85SEGpGfcHVZ
IaGJ1o24/r2EaUTSui8F9DqL+pglERtP66Q00OugdNDrnCzQ64ps0OuGHOJVM4jkO0C+NYh4
VqSRBuJ/k2dDyUx/OmkgfkhwGU7mvemW915iD3EbIpXc4zK3mohcHPtEJL+VqzsRGftEJF27
s49cdN3OR+6k31k3EXkcFMtndCKymMnmjUxEFivGr6YN8ERkCZ2IbNG/q6/dmWiaigV+kiA1
3H8t5iYxF5P+a2TdCjOJWazwfiKk/2rfRaRY6e237KSLCHVlwd+hXfQSrotOSWxl3F/SOBJ9
QLexN1muUxrJRruqqKM71879Bxoz2PUhPhOpkYn/QSvrPCGyuClmlWpePHlgvTaFdpbzLIqH
FsNEk2LYYqsYLJcWGQsDjzMcarqlkt5/dvfjc+n97vKRkftTl/+msr8KYxRp7Zg3Z3Nz+s5j
XjAjbBbMCBsFM8mkYNosCobuIuDXBtnEFKgTwrujkAJSImuQsCbcWPzvE3648asHabz85pxR
DW9cFonf/ebXd+x+uvDgB1DBFZA3qgLB45MTTFHNnJDZSzHG4jKK6jXzYptgs9gmWBabeSNz
ievt5nq7uVcieLtNFnq7Tf6Cvd2mmHq7sfhmQfjoZVxLbBN4u012vd1cbzfX2831djuLvd3m
fxn9R+b37T8y33VLEiXOt+nt5oqVK1ayYmXD280VK0uxcr3dRHKlj2NMdr3dXG830j2kZc92
ArcKvN0mx+bt9gfN2+3RSCewgvF2W9CHtxseQHwxSfcc60zWPccgS/d228R4u42x4e22kvF2
O8F4u1Uw3m4vMt5ur9rwdjvIeLvtZbzdqhlvt702vN06GW83dcC83cwa7nMtOoEL+8Hb7WoL
T6r1Fp5UmyzwbLPwdtvZD95u37PwaLvLIu1ui87x4xbebr/pB2+3/7HwdjtuUUYnLcroTD94
uyVZeLulRbzdYvZfCs/kDLZ0XjJ3GeIdmCZOKpo2VeDANKmkaOpkzYFp2oyiKdNQI7m0aNLk
qWG/rilF0yZr/kulU4omTQz7L80onTIlFnc3ly9ifzdcVWcnHl9+RRmT3T+MEbcjs/rR4W0Y
qoBSUEWjVzNXI9OzHpmYTeh5GzLrOxnz/T1kWu9C193IdD2G3nmBMYsvo2dvo3c/Qu9+zpgh
n5KE+ip9ObwNI+3IuUw7ciHj8EarLbrhGj2nfRPj8NbGOLztZBzevsc4vN3FOLzdzTi8PcY4
vL3AOLy9zDi8vc04vH3EOLx9zji8+RiHN+oMjAvdai7yK67DW6I4vP0R3I2qv8wOb6VCh7fS
L9jhbZqlw9t0S4e3GaYOb6XcPOZXLBzeSmN3eCsdIIe3UsbhbRrXS6ckXiNw6Cn9cju8lfaj
w9t0k2LYbqsYzLeaNpYE1un2D0IVdMzhyq8OjXi4pa36ccQL7s43ru83b7dzSfPBpDGbm9NH
BvPyGGazPIbZKI8ZJuVxrUV5WPm5GZzc0FOhn9tX8r7y/Ob9yyN+bcuqLrhr2CtXROJXb/14
039kVjvm54ZHCseJURV5q12ES0f+HfMCG2ezwMZF6eFWjYriH2y3KgUnnrgObgPg4PYT18Ht
rG1UviZwcHtN4OA2U+jgNvMLdnArM3VwY/HN1ixNuHpoFzi4zXQd3FwHN9fBzXVwO4sd3NwN
ktx9t9zt3Fyxcrdzc7dzO+u3c5vpOri5Dm6ke0jLnu0EXidwcLPZCfyJFhsj3M6tmtnOrZNx
cPuqDQe3E4yD217Gwa2CcXDrYhzcpttwcOtkHNxy0nQHt2rGwe1VxsENMvt2cHuRcXA7yDi4
bWIc3F614eB2kHFwWynt4DYuik7gODDfzm2+RSfwsn5wcFth4Ty1wcJ5qtkCz20WDm67+8HB
7XYLJ7YfWaTda9E5/g8LB7ff9oOD258sHNzetSijTyzKCD9w2sEtxcLBLSPi4JaH7nIU24eF
XxTl/lwSLkslRaUTBS5LkycVlc7QXJZKpxVNnqi5ck2eonkgTZg+qWh62GNp6sSiaWSLrhlT
ZsTk4uZyxszJbQjiSm4icuZXlDXZ/cMacWsypx/c3MaRvyNQNZSCqhu9slmBDNAGZGia0fNt
yLjvZoz47cjA/ghd9yID9gR650XGOP4vevYOevdj9G6IMUbJShJqtYvc3MYRmmgl6QW9UsQ2
7TLGzW0F4+a2gXFza2bc3LYxbm67GTe32xk3tx8xbm73Mm5uTzBubi8ybm7/y7i5vcO4uX3M
uLmFGDe3ZMbNLZ26uaFit5qQvDzmCUnXy21gvNzcbd2+3F5us4VebrO/YC+3OZZebuWWXm4V
pl5us7nJzMstvNxmx+7lNnuAvNxmM15uc7iuOiWxQ+DOM/vL7eU2ux+93MpNiqHTVjFIbut2
/csXR5zbfvzrmyLObS/6JurPf/xywmzrNrsft3WrMCmY6y0KJuZt3bJu2/Fe6i9rIu5tG1+a
N+Wx31dH4l0Xp374xzcWJvi2brMHeFu3pa7TWxw7vW0kl+v05jq9VQqd3vDTMvjinN7mmjq9
sfjmaJYmXEnsEDi9Vdqb7wATpzdgnN6AcXoDE6c3YJzegHF6A8bpDQfq9IYDdXoDE6c3bSaG
OL0B4/QGjNMbDtTpTWM+cXoLW4FPhDCp0xswTm/AOL0B4/SGg+v05jq9uU5vcej05u6T5G6/
5e7q5oqVu6ubu6vbWb+rW6Xr9OY6vZHuITDDcbQT+I8CpzepTmBvpzets6foHSE1Ve8EVvTh
9KZ1GonTGw6biNMbDvQMU805jDi9afD7cHrT8CFObxoc5p6eYaqN7xOnNxz6OsMUB3qGqaYa
WTrO9AxTrVPX72eYRuv0ZtZwr7ToBC7oB6e3b1g4VK2zcKhyzzB1loYvzRmmthyYnN2ka0pJ
0dQSgffS1KIZ07QbvCNXyWTURp5UNHkSOaxzRtG0iZrz0vTpRZOnEuelGaVT+ukM0y8vWyzP
MI1jtvyK8iW7f/gibkRm9qOv2zBU+6SgWkavY76B7M46ZF/6/wxT1teNbulWyTQiFzC+bt9g
fN3WMb5uZ8MZple4vm5x7OtG5yHdHd1cX7f5Ql+3+dw85ED7ul1i6etWZenrdqmpr9t8bg7z
Cgtft/mx+7rNHyBft/mMr9slXA+dkvgtgS/P/Oh83YDxaevrPp593eb3o69blUkx7LRVDHZ3
dMNhasaD1H8Llvx6cmSavvZ7r1WwlMT/jm7z+3FHt0tNymOXRXnEtKMbDk+9s1Pd+m745FIc
/ud7yrpj1y+PxP9ecd2+rw9dlrA7us0fsB3dKrvC3JmbU8BVSClaE5gMz0Xu5uX4yJjufHKX
DJdgxkJldWUngQU2YUEEFkRgab+VBK9RDuI1ykG8zncQr/MdxEt1EC/VEbwGdXpIJY+bVHY3
ZQ93SZZ6sReQ3iWhTR+3Q2LskqQiuzBYa9I2J9+cVpA+KzvMJy88CpPgapTqQ13lDGKm1yAb
6CVzPXfCjaRLqxDe7kqlJpr3xFlXoZtuPe1uMm9Dn/uYZuka9PVJjM06WEGRF0GCiuUVeVoZ
0zeGordpZUqbxgpz72Huvcz9XriBWH0f07g+Qy4+KH2ke/pI9/aR3q01OnyCMhxiSFEIzl6t
4p1lWvInykkzu0KP3+cLQ1AIJI8QwtcqDNGDq5h4GIJHg+BFOCVFCcGrQUhGliIV/l2bwUvq
W5ItA84THSRRHucg7evM4Grke2A8KU+7VupubZjc00cue3DTpODi3PsqjDQotr+lSH3LPtx0
KbjpAho8tr/lkfqWfbgZUnAzOBqUs0CWlLNAlpSzQJY8Z4Esec4CWfIkrCxd2LlL2PL4yrlH
H7p+ycZyDOI+n051mP+ToL7XO/yvPjBjFdivt2m58fKtizUpmQB4Fwzc4grH5ypDFIWJL/cM
UTxMvN47RPFq8Z2Rfo0wlBdEvh7m0G7ye0N4wS/sg7GkDVFk1mgJM6KkEg8CXEjYqJg2pnAf
yZ/ydQs2jq4wExTFhjqL2dgHG8ABNqQI2OBx2bCLGYjim9IHy/XGtBkbFlb0NmV2GGDGBuib
DX0oBbBsMIORJGCDz7KHcZ9PThr0HlA/sQEk2CAjDUkuG3aRkQTnlMLTZwsmTpUixVFp8MRk
Ir9AaUj9srNheCdttGVHPpGnN6lDaRFyuiov0FyO03o1pml6vjb9YQCGB3k7R2n5NiSd9u/K
2Jx9S5KatipjcXZ4ILES5TwB3yLo/wl+wA3C0pYOf50YqCFQw+BMPpnkwY/o8zzYapgXt9eF
USzERK0I88wP9yYPz743ZWX2C8mzsnelzMp+OHl09p0pNdkKlETBsxIbFL+A7CMe3N2VYvyl
z+V5Nqazi6HYo110vv7fbHQVs5A4ewzQ+Rx+JF058ChcDWsQULyln4fRbD/65+0FdWxE5X6o
nRh1jgF2Zw5LRXjG1mpALzLarBjajHmWBtkY6IQl/bCfKJefXH3l59jO8inEX1ROwhceM6+o
REST367K8C++NGZQO1ehf9MTGU8fU1ESYeXEyF00KmE1EqqrxJMpn6Q/mboy+/WU8zL+OXVW
dk+KL+PB1P5UCefNSFglFPLPqBL/dMYMCq2bvlaRpb3xxauE4pxKKHGgEnv3/ltCqsRLqeMy
XvKvzP4kdUnGff5Z2a+mlmYc8venSnyCAC1BDYf7/Povrh3w81hqCU9EHViVuObz3u/7fC0f
fvL8xIrHxl9Uen7rcqQSnrhQCY9zKuGJA5Xo7OxMSJU45n8n81jayuzMtJysX6fNyv7I/0nm
X9ISsZbwan5JvEoETvd+/6an/t9DTWfOrzi17YrutJ65SCW8caESXudUwhsHKvHSSy8loEqk
wgLUl8D9r3rUlwj3v2Zlh/tf/aUSS1CfYTiCf2em/hvIDj8PRFVLhHugfkOrwR+RnorKcYSO
cB/Wy5Q4yVHRX321VK1/+8/JK7X+bRviLe7f4l9PApkce/z1fgH89cD/eCv8T2bOTfvcu8b/
z5mj0ob4rvXvyExGqj7JS/ir2ufvJK82PzXA/NX1vKCXjVN6jzFE3suDYo3Ca0Nhm3EDStus
0TmF5CjsHBQZl70YmSb65ngcs+sUN4EsqfQRUFla8d9XSr120jQv0CLGzysZNqK/hVEVuw7X
qth9qWOz/8k/ImdM6uLsjf6T2RWpgewr/K9k68Xukyp2XwIW+2gIFzvmsajYw/3IZEOx43Hu
r9bUBesDfKlmaKX6alH/lKoO16pU/8H3a/9DSUpOo++YvyvpL9m7fEra1qRf48pIkVfmEgXU
f0CIKIiF+PfXyGY9lKT/4ueN6PlfssO/x9DzriT9Fz/fhd8jvwoyKluT9N9fZ5uX6re80Zaq
jyhzjokye7RSLQ4v/yClivcLu1Bdvb62cR3e20Td1NwUDKBfbZuT2tV4xV0m1en/z965B0VV
xXH87t27dx+X3b0Lpvai/UMRTQI2pS3AVtTCUUwtK8kmUV6KyxaSiWEsGRiNkq8oRRxfaWiR
DpAVNiqKRlj5mDAtRs2hqCQnc4qmiO499+4LFpd9s/j7zuyc3XN/e3bv/Z7ffe05n41AOa2O
wMKs7l/1tJ9Eq+CPTlCtEATtVB6Sn1MMDzIqy+XXFPFBmcoVcqvUDncqtcN3MkYJmFVgy0NM
O9UKS8nWG5n64XxZztSfU1hKtj6TqY/nS/Z7XFNYyvig3jvBKpmrnWA7n9qf9pLaQtQJxBhu
ldrsHfzZ0XxuOzKX/Wq+NzcIOyJ6RlkpmUq3igqURZJwuoV8W6mX0DQL6+AzXNd3c9UEpiv5
q6vrD+bL9Fa2MhuhgDGuSGIpw2muni0dvd/z+20Ms5zic3YSvJ0W5B1np3kqSt921TR/3sXO
A9VjU7Bs9gO8aua/ym2ydsZMNb1c1siYqaXTZPu9bKaaaX+5zFI28mY2+sVMAW+mwGymCJlJ
25hJYz1nrvVfVyvoLqpU1So6Qn9HLVS1kOfpo9RMlXddPcKs5hNyS7lQxdWzpe9dxXlXcbOr
JHJ1MIZbuToY6w0i3n+9naCaQ40JbhVlqLQUHdxCFqjUVIeb3q7kvbBXsh5mMO1rKUtJB3P1
bOno/Z73Vsh7KzR7K0behthkbAhmdwJdfzN2qM6I5jm9LihER/tRWAK2aDM/55SFeKnJm98J
6svAXOvftbdu3cne/mXvd2Fz585Fr9myra0NPQ+kmIEo8AcEAjmjq0bTuU47+lHCdLAZY/op
BgQC9VntGDuz3fr3i64BeHSGGIiBmL7HWI6tuNWxFbYUxECMK1kkhCyCGIhxM4sIuM4DgVy8
zjNlkQiyCARyM4tIyCIQyM0sEkMWgUAu6arOqFthHl9iwRXvMBMNuDv6OxEaniNJ24p7rRtv
iZBgtpP2uJlUh3UzJZ1MY8lLUha1M+WuezBs6YX2jU3T6nWDine/el8QGUJfifht9cvrjydl
Fb3zbWLqtqrEQsGo2gnFJYJ7jg25npdf/NC7EdMiy37Ah4UGn/mkM+Or/MX/hRGd3+yLUSVc
2y1ZIIw7f7m9fFnS7eU7diVURp/uwCsKDnRMjF65RqO52CEcWd8x4o0368ZHrhlSM4jQX9oy
+v64dP081R2vlXXkhiY9XFraXto8Vv/X349OmJSAGwuowwWfbhuVP6NzT7K++b3oq005Waeq
Y0tO33VifOGeGx9oYg/sWn1lS92NxmxJatGxJQ3VDceLiKbfnhycogz79VzJgmqiYMgww4f5
xy7+9IpiZurBS2/W3Tlq5Df7y5YVPrv26weqauua78+u1n70z4TIqdEz/81Y91T6iCMRe19b
EqXfV1KUVzQ19mfRiQZx4ccLk8si26//+Fjt2JDQEZKV5Px3Liz+9Xr4+NhNB2tefyv+uQOb
l1c2lFPlNRueiYmf0UEt++qLthcux1yLG/cJafjl+PQQ7Ssds7Sxa+sSy2at2JP6fvrRp6VZ
Zy+f2Pv547UlXyrrNXdnRI5u2LDu79llR7ePeftkzvfKrDNV2v1xcRtfqgs9uVeUkl656tKz
RIyg3Jh0OGxuyD7pt8QiPGb26qSyrqZsvR6/0bxlS2bLpJ9LyvH4reIbxtBTwmU6ZZvgs7yu
KLIzcvPuyY3JadmpwTylWMB0m14mZNj7myGAFDuQ8eaQYkEPSPFINJBL4hVIsXV9T0ixRc5A
itmHCVJsapMFzImsnpNWz8VYb5Bi63fbgwiLHCwnHSwXY+5Dign+Cpvkz25cgxRL+XlrMoxy
ETEsQy0EMa4oXGyBQi0oMZrpVQApdiSAFNsKIMUAKQZIsaf6EkCKAVLsXl/iYIHSHmce/QVS
THSDFIu6QYrJbpBisa8gxVwDtsxFWa8nU+wlkkTsS+aiH+m8FGyGYqzHf+fdCpBie0khv+kV
xi1D51XAZijGbPCpHkiKgIAU20sK2qO9IWAhxapbfTMMNZ9CAqS495s0pte+hxTPUXCQYqOC
gxRnKrwLKfb8NuNYewS6RewMpDiz6mzilIoHdL6HFOO+gBR3Nx8gxbcapFiEOlVgQIpxX0CK
/Z0SgQsp/kjOQYovyDlIcb3cu5Bib6UEiVhrfYEUz6OffrBmabTukeEv4pvUj/gBUoz7AlLs
75QIXEjxIQUHKb7CQ4qbFIEJKRYjqFVfIMUm/T6l82Dl0jA/QIpxX0CK/Z0SACnu7xBdKUCK
vbp9g/wCKf5TqJNWyBNkdxCp0jx5qExD5EtTbCHFTiEt0V/a+3j7ehtSLEEn5WE2tFqWYtm3
MXEByih2EmQaeK47YhRLgVE8ABnFMp5RjLvCKGZyGjGKNcAoDmhGMQWMYhMkM/D22wRvLmG2
cxAwigPVTBFvpshs5m3AKHbSVROjeL3cUlozin3vKsm7SppdHTxAGMXxqjnUfcGtohSVlpIF
t5B5KjV13U1vS/k4eyXrYQrPJjaVMp5RLOP+QOWm7/e8t2LeW7HZ2yHAKHaUXcAoDhCBPyAQ
yBkBoxgE8pyAUQwxEAMxwCiGGIgBRjHEQAwwikGggXadB4xiEMhTWQSMYhDI3SwCRjEI5JqA
UQyMYp8yirVGnO827GDy6TmGhWnzc9ULstMN6mg7LGLrEVmQrdx4rdFWY6O48VzsthHYZF33
AVkYGpC1Hg24ckb36vRozBnOH2e5VM6fvnhNs0BPm/YW2ejTJi19Pi1ngT4tO1c9MSU3DTOg
fYNGExmpidJEYVy4AIUrbMMnT2SC0VpxQTgKYoeaTTPkps0zGLJ6hAhRiMTSh2wXE2ix3OZj
0nJsY0QoRso1kWuYb1hku5xEy1EFX/8GNoxfBXxV1zj28eXJk+PsbTfLnlSrE6L5j11uSqD7
HwAA//8DAFS2A2c=</Template></GraphPadPrismFile>
