# Supplementary material for: Sorting nexin-27 regulates AMPA receptor trafficking through the synaptic adhesion protein LRFN2
Source: eLife journal article supplement (doi:10.7554/elife.59432), 2021-07-12
Supplement: fig5-data2 [file elife-59432-fig5-data2-v2.pzfx]

<?xml version="1.0" encoding="UTF-8"?>
<GraphPadPrismFile xmlns="http://graphpad.com/prism/Prism.htm" PrismXMLVersion="5.00">
<Created>
<OriginalVersion CreatedByProgram="GraphPad Prism" CreatedByVersion="9.1.2.226" Login="nskjmm" DateTime="2021-06-17T15:08:07+00:00"/>
<MostRecentVersion CreatedByProgram="GraphPad Prism" CreatedByVersion="9.1.2.226" Login="nskjmm" DateTime="2021-06-17T15:08:58+00:00"/>
</Created>
<InfoSequence>
<Ref ID="Info0" Selected="1"/>
</InfoSequence>
<Info ID="Info0">
<Title>Project info 1</Title>
<Notes/>
<Constant><Name>Experiment Date</Name><Value>2020-12-17</Value></Constant>
<Constant><Name>Experiment ID</Name><Value/></Constant>
<Constant><Name>Notebook ID</Name><Value/></Constant>
<Constant><Name>Project</Name><Value/></Constant>
<Constant><Name>Experimenter</Name><Value/></Constant>
<Constant><Name>Protocol</Name><Value/></Constant>
</Info>

<TableSequence>
<Ref ID="Table0"/>
<Ref ID="Table5"/>
<Ref ID="Table3"/>
<Ref ID="Table10" Selected="1"/>
</TableSequence>
<Table ID="Table0" XFormat="none" TableType="OneWay" EVFormat="AsteriskAfterNumber">
<Title>Fig 5A IF Surface GLUA1 after SNX27 shRNA</Title>
<YColumn Width="133" Decimals="5" Subcolumns="1">
<Title><B>Control shRNA</B></Title>
<Subcolumn>
<d>10.315</d>
<d>14.16067</d>
<d>10.688</d>
<d>14.52667</d>
<d>15.70033</d>
<d>12.864</d>
<d>15.97467</d>
<d>13.42167</d>
<d>14.624</d>
<d>13.75333</d>
<d>33.03833</d>
<d>23.718</d>
<d>16.893</d>
<d>15.335</d>
<d>17.983</d>
<d>20.478</d>
<d>19.925</d>
<d>16.902</d>
<d>20.13533</d>
<d>20.41767</d>
<d>17.606</d>
<d>23.33967</d>
<d>17.42267</d>
<d>14.664</d>
<d>10.845</d>
<d>13.64267</d>
<d>16.232</d>
<d>17.05067</d>
<d>13.61667</d>
<d>16.317</d>
<d>12.533</d>
<d>11.712</d>
<d>14.773</d>
<d>15.47833</d>
<d>17.576</d>
<d>13.75667</d>
<d>20.28533</d>
<d>22.153</d>
<d>16.41767</d>
<d>15.703</d>
<d>15.60267</d>
<d>16.032</d>
<d>27.11033</d>
<d>27.36533</d>
<d>23.523</d>
<d>21.17033</d>
<d>19.96433</d>
<d>20.8</d>
<d>19.126</d>
<d>24.70033</d>
</Subcolumn>
</YColumn>
<YColumn Width="131" Decimals="6" Subcolumns="1">
<Title><B>SNX27 shRNA</B></Title>
<Subcolumn>
<d>14.882</d>
<d>17.27333</d>
<d>13.56933</d>
<d>15.89333</d>
<d>14.64633</d>
<d>12.26933</d>
<d>13.781</d>
<d>12.75967</d>
<d>12.434</d>
<d>15.18367</d>
<d>18.76133</d>
<d>11.00533</d>
<d>18.54</d>
<d>12.211</d>
<d>20.37067</d>
<d>16.37767</d>
<d>21.59167</d>
<d>16.52233</d>
<d>22.78733</d>
<d>26.01733</d>
<d>9.310333</d>
<d>9.707333</d>
<d>7.368</d>
<d>7.777667</d>
<d>9.819</d>
<d>12.76433</d>
<d>9.324333</d>
<d>18.86067</d>
<d>12.496</d>
<d>12.38033</d>
<d>12.45133</d>
<d>14.187</d>
<d>14.85033</d>
<d>13.90467</d>
<d>9.967667</d>
<d>9.822333</d>
<d>13.334</d>
<d>13.944</d>
<d>10.397</d>
<d>10.74467</d>
<d>14.63067</d>
<d>16.17367</d>
<d>12.12867</d>
<d>17.65433</d>
<d>15.14367</d>
<d>12.91133</d>
<d>19.36233</d>
<d>18.179</d>
<d>17.753</d>
<d>13.02433</d>
</Subcolumn>
</YColumn>
</Table>
<Table ID="Table5" XFormat="none" TableType="OneWay" EVFormat="AsteriskAfterNumber">
<Title>Fig 5A IF Surface GLUA2 after SNX27 shRNA</Title>
<YColumn Width="133" Decimals="5" Subcolumns="1">
<Title>Control shRNA</Title>
<Subcolumn>
<d>15.01</d>
<d>33.976</d>
<d>15.99333</d>
<d>19.866</d>
<d>22.517</d>
<d>24.868</d>
<d>20.23333</d>
<d>31.79</d>
<d>25.43267</d>
<d>28.35033</d>
<d>27.63633</d>
<d>25.873</d>
<d>21.26233</d>
<d>31.37433</d>
<d>41.37367</d>
<d>29.16567</d>
<d>31.183</d>
<d>28.70033</d>
<d>27.46967</d>
<d>25.557</d>
<d>25.41133</d>
<d>33.06333</d>
<d>45.50133</d>
<d>33.631</d>
<d>40.41867</d>
<d>38.24233</d>
<d>29.891</d>
<d>26.65267</d>
<d>27.47033</d>
<d>19.71333</d>
<d>46.06233</d>
<d>41.09067</d>
<d>27.20667</d>
<d>55.81233</d>
<d>26.549</d>
<d>52.63933</d>
<d>51.80967</d>
<d>48.81367</d>
<d>74.449</d>
<d>56.29533</d>
<d>41.74033</d>
<d>24.055</d>
<d>40.80633</d>
<d>57.25867</d>
<d>31.86267</d>
<d>50.20433</d>
<d>29.89667</d>
<d>26.173</d>
<d>20.087</d>
<d>44.609</d>
</Subcolumn>
</YColumn>
<YColumn Width="131" Decimals="6" Subcolumns="1">
<Title>SNX27 shRNA</Title>
<Subcolumn>
<d>21.53167</d>
<d>10.59833</d>
<d>16.58533</d>
<d>20.70467</d>
<d>11.43133</d>
<d>19.209</d>
<d>15.174</d>
<d>11.352</d>
<d>16.113</d>
<d>21.38467</d>
<d>33.29533</d>
<d>12.80067</d>
<d>25.81767</d>
<d>34.41833</d>
<d>19.26133</d>
<d>34.60433</d>
<d>23.67</d>
<d>17.455</d>
<d>19.06033</d>
<d>24.068</d>
<d>17.71133</d>
<d>12.813</d>
<d>10.08133</d>
<d>13.571</d>
<d>10.09267</d>
<d>9.690333</d>
<d>12.38267</d>
<d>10.797</d>
<d>11.67667</d>
<d>22.03867</d>
<d>47.51167</d>
<d>32.64533</d>
<d>28.733</d>
<d>55.269</d>
<d>29.236</d>
<d>46.40433</d>
<d>39.96067</d>
<d>38.63467</d>
<d>32.16567</d>
<d>60.16767</d>
<d>30.09533</d>
<d>30.622</d>
<d>19.72867</d>
<d>26.55633</d>
<d>31.66867</d>
<d>19.132</d>
<d>18.07167</d>
<d>18.229</d>
<d>19.52133</d>
<d>18.494</d>
</Subcolumn>
</YColumn>
</Table>
<Table ID="Table3" XFormat="none" TableType="OneWay" EVFormat="AsteriskAfterNumber">
<Title>Fig 5B IF Surface GLUA1 after LRFN2 shRNA</Title>
<YColumn Width="133" Decimals="5" Subcolumns="1">
<Title><B>Control shRNA</B></Title>
<Subcolumn>
<d>16.57433</d>
<d>12.15567</d>
<d>11.54933</d>
<d>13.89533</d>
<d>22.73167</d>
<d>17.22033</d>
<d>11.75533</d>
<d>11.868</d>
<d>18.902</d>
<d>15.156</d>
<d>13.17167</d>
<d>11.62667</d>
<d>12.67333</d>
<d>17.17933</d>
<d>13.29467</d>
<d>13.91033</d>
<d>12.311</d>
<d>17.90367</d>
<d>16.08367</d>
<d>17.90367</d>
<d>17.606</d>
<d>23.33967</d>
<d>17.42267</d>
<d>14.664</d>
<d>10.845</d>
<d>13.64267</d>
<d>16.232</d>
<d>17.05067</d>
<d>13.61667</d>
<d>16.317</d>
<d>15.60267</d>
<d>16.032</d>
<d>27.11033</d>
<d>27.36533</d>
<d>23.523</d>
<d>21.17033</d>
<d>19.96433</d>
<d>20.8</d>
<d>19.126</d>
<d>24.70033</d>
<d>12.69533</d>
<d>14.17233</d>
<d>22.53967</d>
<d>16.83833</d>
<d>22.299</d>
<d>15.015</d>
<d>16.81667</d>
<d>13.41767</d>
<d>12.75733</d>
<d>18.02967</d>
</Subcolumn>
</YColumn>
<YColumn Width="131" Decimals="6" Subcolumns="1">
<Title><B>LRFN2 shRNA</B></Title>
<Subcolumn>
<d>9.158333</d>
<d>10.74933</d>
<d>16.35533</d>
<d>13.573</d>
<d>10.046</d>
<d>19.92233</d>
<d>27.39933</d>
<d>7.309333</d>
<d>17.34167</d>
<d>14.74133</d>
<d>8.63</d>
<d>12.84367</d>
<d>13.68967</d>
<d>12.05133</d>
<d>17.45667</d>
<d>18.122</d>
<d>23.007</d>
<d>10.50333</d>
<d>28.70333</d>
<d>20.65233</d>
<d>14.751</d>
<d>14.33133</d>
<d>7.700333</d>
<d>13.04667</d>
<d>11.449</d>
<d>20.171</d>
<d>14.574</d>
<d>16.30233</d>
<d>7.976333</d>
<d>7.423</d>
<d>17.541</d>
<d>15.65533</d>
<d>15.33333</d>
<d>20.40833</d>
<d>22.845</d>
<d>12.13167</d>
<d>20.477</d>
<d>21.108</d>
<d>15.18</d>
<d>20.507</d>
<d>23.05433</d>
<d>18.84267</d>
<d>21.71367</d>
<d>21.94333</d>
<d>28.89633</d>
<d>23.15233</d>
<d>22.30633</d>
<d>22.119</d>
<d>16.304</d>
<d>25.529</d>
</Subcolumn>
</YColumn>
</Table>
<Table ID="Table10" XFormat="none" TableType="OneWay" EVFormat="AsteriskAfterNumber">
<Title>Fig 5B IF Surface GLUA2 after LRFN2 shRNA</Title>
<YColumn Width="133" Decimals="5" Subcolumns="1">
<Title>Control shRNA</Title>
<Subcolumn>
<d>15.01</d>
<d>33.976</d>
<d>15.99333</d>
<d>19.866</d>
<d>22.517</d>
<d>24.868</d>
<d>20.23333</d>
<d>31.79</d>
<d>25.43267</d>
<d>28.35033</d>
<d>25.41133</d>
<d>33.06333</d>
<d>45.50133</d>
<d>33.631</d>
<d>40.41867</d>
<d>38.24233</d>
<d>29.891</d>
<d>26.65267</d>
<d>27.47033</d>
<d>19.71333</d>
<d>41.74033</d>
<d>24.055</d>
<d>40.80633</d>
<d>57.25867</d>
<d>31.86267</d>
<d>50.20433</d>
<d>29.89667</d>
<d>26.173</d>
<d>20.087</d>
<d>44.609</d>
<d>24.22333</d>
<d>25.108</d>
<d>27.74933</d>
<d>24.32667</d>
<d>29.005</d>
<d>25.21467</d>
<d>23.08867</d>
<d>20.00967</d>
<d>30.426</d>
<d>19.57167</d>
<d>37.453</d>
<d>29.46233</d>
<d>34.941</d>
<d>31.52333</d>
<d>47.46867</d>
<d>30.92067</d>
<d>38.29133</d>
<d>52.39933</d>
<d>29.42767</d>
<d>26.797</d>
</Subcolumn>
</YColumn>
<YColumn Width="131" Decimals="6" Subcolumns="1">
<Title>LRFN2 shRNA</Title>
<Subcolumn>
<d>6.750333</d>
<d>14.176</d>
<d>12.53433</d>
<d>11.86533</d>
<d>10.96167</d>
<d>17.17967</d>
<d>12.77067</d>
<d>15.358</d>
<d>12.216</d>
<d>15.325</d>
<d>16.679</d>
<d>11.84433</d>
<d>15.04933</d>
<d>15.983</d>
<d>13.67533</d>
<d>24.605</d>
<d>16.52</d>
<d>21.76933</d>
<d>13.398</d>
<d>17.91833</d>
<d>30.04933</d>
<d>35.75767</d>
<d>24.56733</d>
<d>28.17267</d>
<d>41.80933</d>
<d>40.252</d>
<d>59.492</d>
<d>46.41367</d>
<d>45.77467</d>
<d>42.89267</d>
<d>19.466</d>
<d>15.26</d>
<d>15.14067</d>
<d>21.87067</d>
<d>21.60033</d>
<d>16.87833</d>
<d>14.836</d>
<d>16.75733</d>
<d>19.712</d>
<d>17.80567</d>
<d>30.232</d>
<d>27.29967</d>
<d>18.37267</d>
<d>16.181</d>
<d>13.82333</d>
<d>34.089</d>
<d>21.50867</d>
<d>18.558</d>
<d>15.678</d>
<d>25.64667</d>
</Subcolumn>
</YColumn>
</Table>

<!--Analyses, graphs and layouts as compressed binary. Don't edit this part of the file.-->

<Template xmlns:dt="urn:schemas-microsoft-com:datatypes" dt:dt="bin.base64">eNrsnQd8FEX7x2evJLlLuRCKtMSTotSQTugXBAQVRMCuQCAHRFIwCVWQKJAXO/YCIihK8dUX
y4sF9UXFCtYXX9tfRUVFxVdeFRUL+e/szt7t77LXkruEhOfhs2y+u3OzszM7ZZ9n5tnxJ48a
dcqEghypOoExtkpaJZnk/4vYuab1bJZ85GkTA1luZkyS9/ywvZu8l/9wszIWqpzChhseN1WP
P4kxi/xXjLzNlDervP0sX8rOvMdrZWGCtY2LJPb8N2am/ibQ1UhISEhISEiOTtFGGWZdP09C
QkJCQkLS/MQs+vQYygoSEhISEhISEhISEhISEhISEhISEhKSeotZmf92oDVjr3RgbIKZsdND
MKV7g/DpdgeZxKzqDDsLWxPihdc00Q3HVHPzQqz8zzvxr6CiuLAkwG/y5K2tjlepswnNJqmL
iEedijBxYem08gARDZK3VMN4UkQ8JmU7p7hsZpG8VfqJJ1feehvGYxLxmJUDk4pL3ZXOce75
zgnlpYVlhvG0DpgetaDPdlcUFZYV+r2vk+QtOWD+WJUDJxeWFE+rKA4YT6uA8ahmodHuknnu
quLphSGW+SpJV/6uJcpdre/K2GXKX3yS6s0sTpy/kGkkqY93rUomIDOQRdDVyl/t5e0WtifW
OyG1/qmlyaokJCQkJCRNLbxjXu0Z/L7E5pm0kRYJSWOKyTVAeY+RmI0Nk/djC8vK+p4zq7iq
zL3QWeWurHKWz3COKp7pzC1wjhnlnDi3YkbhdLfzlNPPKsh0Fs6oclc4J447N6u/s3LWhHEF
8gCzj4Rvf8o6KlO1Zz0VCVPySJVqNlB54WnFauUikNgfIseeYH2Y8Vz0Vj6vNt5XQu1Vg8tg
5fd2EbY2BIlzLpZDpoXxi0jLENZRvB6p1z8ib5IuLevYaM+LLYNQRwxik4LcxbdMu1/G6q4A
sIpXRPndS8lXm8jNeHnjqxcT5S1J3hzihZXnWYp4CW4jXvLbydtx4jWug7zxu+skb53Fy/sw
5mTeeYpKycW08dyXU6TMpcQ/qXDa3JLCCmeFu3JuSVWl7rceifO+aJo8v1ViNQ5sCiewOZzA
lnACW8MJHBNO4NhwAseFE9hmHNjuNAps9wkc7wwQOD6cwAnhBE4MJ3BSOIEd4QRODidwq3AC
p4QTuHU4gduEE7htOIHbhRP4uHACtw8ncIdwAncMJ3CncAJ3DidwqnHgUWy03KJY4izMmUQD
DRKSlvTObPSOXN/h5hR5nDJFGeaFEvqHpUfrXsuTKWLoOkWwGCstre/G49ijxHSH50XkfqUv
lLytsMdqsZEt0ZUPD8EH5bwzHO+cV1gy1x25B6FTn5Ta4l8zh6mjf9Z2iTjuTYLkk4SJc0v5
a2xFYdnsSmdBpNIx6W6XmgTJIAmmQEmImPHltY0iCSaDJJh9kgCv9mdFKglv1YgkmA2SYPFN
gruouLAsckXAOjx47xbb5AyRBItBEqzGSYic/avPBw+3WvmP3iIJVoMkxPgkYUTxjBnuCnfZ
dPdAZ8H0qrkBTcahSHvL2Ul9syw71CTEGCQhNkASRpcXzXRX9j3dPatUfkLqmYSHEtt+8ee1
sSIJsZ4kbPYoMvQKIC0J+radhfULU9i/MIf9C0oVpYpSRamiVFGqKFWUKkoVpepYSVWic7kw
XUm6jZsnugmTV768jRYsMe+8TT73UmcSds6rTHeeXF5WVVFeoh5ZGm+VrJKUaJU8d6a90ks+
b0xcBggLtSl8C3UWWagjaqE2RchCbQULdUrYFupQfxEtC3Wizvac5NdCnRjEQp1EFmqyUJOF
mizUZKEmCzUJCQlZqMlC3TgWalM0LdSVF3x27nd3fTs0sIXaFHUL9e67glioTVG3UF+3KYiF
2hR1C/WOZUEs1KZoWqh7Wj+e/M6+IUEs1KZoWqgVWZcdxEJtiqaFeoL9qWc2XNktiIXaFE0L
9T23ndnn8QNdyUJNqaJUUaooVZQqShWlilJFqaJUNUsL9SJhujLpLNQJOgt1urwNNbBQpwaz
UHvuR3uRD2SXNge1Sw/3t3L69AmjxmWRXbrBdmlzhOzSZrBLtw7bLh3qL6Jll7bpLM52v3Zp
WxC7tJ3s0mSXJrs02aXJLk12aRISErJLk126cezS5mjapb/rPtv5TvaBICunzVG3S391bxC7
tDn6dul7g9ilzVG3S2fcFMQubY6mXXrZjtfWjxwVbOW0OZp26Zfu+eZA0aSMIHZpczTt0qxm
55Bbh/59WGC7tDmadunqhAcWdP1p5zCyS1OqKFWUKkoVpYpSRamiVFGqKFXNeeW03hVZqCun
dSbhkFZOa6/0gSzUlvAt1FlkoY6ohdoSIQu1HSzUbcK2UIf6i2hZqFN1tuc0vxbq1CAW6jSy
UJOFmizUZKEmCzVZqElISMhCTRbqxrFQW6JpoX5svv36U2dsDrJy2hJ1C/WaNUEs1JaoW6hP
3BzEQm2JuoV66uVBLNSWaFqoD/xu3V7YP9jKaUs0LdQzn5DuPv6yzCAWaks0LdT2FXH5yytO
CrJy2hJNC/XgzO9eHH8/rZymVFGqKFWUKkoVpYpSRamiVFGqmvfKaQsLf+V0QAu15360F3lj
u3RctXoHNtaL63Ub8HlpNTtcZIL2asx0JmgXi2cZ4mGxizK2ixLJFNsKeVsmb0toOyq3DKaa
DrW37hN0+zhRhrwiO9fH1tGp1kDbUveYVvf1tYc/Ltexc8VR/e/tIhV6z4F2gzaM6TSFPA6H
7jcm5Slsrwul3ScP6VrKjZntfVLsmutSnlJ+vcQ63yRwzXMpzy8/66gebKBB5nu37n7ixL1I
BvdoU+yj2KYlK62XKj8pbaFJtIlau3g9G8+8Rml9nK10Ka2j2glSl1eJyQMOl3pfUoPui9d9
fVvakLtyROSurhT9mFcHneDMED2T9iRqc6cSDJ5U7e840Z+Y9f1JPZ1uSNSfUH9C/YnoT7RR
Ix8P1kjpzGzqZ3gsvP5EM2A0dn9iC9if2P32JzafdtfcQvoTe4PuKwHfBY7y/sRs0J/YdU+q
zaA/4fNmea0YX1F+sXt6lbO4bEa5M9NZUqzOnJ1eXlZZVVhWVSm6kf1mddMe3w0mRt2IQTey
QSkC324kQRRSqW6j5vro3ZioSKUGpc0bjh5+XkseVDYp4DH9pHlFlpoUNn4tSfC5utaNJITQ
jejlayXds8T9qVQMdDHQbKASoFKgMqByoDlAlwBVAFUCVQHNBZoHNB9oAdBCoEVAlwItBloC
dBnQUqBqoMuBrgBaBrQcaAVQDdDfgFYCXQl0FdDVQNcAXQt0HdD1QKuAbgC6EegmoJuBbgG6
Feg2oNuB7gC6E2g10Bqgu4DWAt0NtA5oPdA9QPcCbQC6D+h+oI1Am4A2A20BegDo70APAj0E
9A+grUAPAz0C9CjQY0D/BNoG9DjQE0BPAj0FtB3oaaBngJ4F+hfQDqDngJ4HegFoJ9CLQC8B
vQz0CtCrQK8B7QLaDfQ60BtAbwK9BfQ20DtA/wbaA/Qu0H+A3gN6H+gDoA+BPgL6P6CPgT4B
+hRoL9BnQJ8DfQG0D+hLoK+AvgbaD/QN0LdA3wEdAPoe6L9APwAdBPof0I9APwH9DHQI6Beg
X4F+AzoM9DvQH0B/Av0FdASoFogPQbwkAZmAzEAWICtQDFAsUByQDcgOFA+UAJQIlATkAEoG
agWUAtQaqA1QW6B2QMcBtQfqANQRqBNQZ6BUoDSg44GcQCcAdQHqCtQNqDvQiUAnAfUA6gnU
C6g3UB+gvkDpQP2AMoAygbKAsoFygHKB8oD6A+UDDQAaCDQIaDDQEKChQMOAXEAFQMOBTgYa
ATQSaBTQKUCjgcYAnQp0GtDpQGOBxgGdATQe6EygCUATgSYBnQV0NtA5QOcCnQd0PtAFQBcC
XQQ0GWgK0FSgQqBpQNOBioDcQDOAZgLNAioGuhhoNlAJUClQGVA50BygS4AqgCqBqoDmAs0D
mg+0AGgh0CKgS4EWAy0BugxoKVA10OVAVwAtA1oOtAKoBuhvQCuBrgS6CuhqoGuArgW6Duh6
oFVANwDdCHQT0M1AtwDdCnQb0O1AdwDdCbQaaA3QXUBrge4GWge0HugeoHuBNgDdB3Q/0Eag
TUCbgbYAPQD0d6AHgR4C+gfQVqCHgR4BehToMaB/Am0DehzoCaAngZ4C2g70NNAzQM8C/Qto
B9BzQM8DvQC0E+hFoJeAXgZ6BehVoNeAdgHtBnod6A2gN4HeAnob6B2gfwPtAXoX6D9A7wG9
D/QB0IdAHwH9H9DHQJ8AfQq0F+gzoM+BvgDaB/Ql0FdAXwPtB/oG6Fug74AOAH0P9F+gH4AO
Av0P6Eegn4B+BjoE9AvQr0C/AR0G+h3oD6A/gf4COgJUC8StTrr3PyATkBnIAmQFigGKBYoD
sgHZgeKBEoASgZKAHEDJQK2AUoBaA7UBagvUDug4oPZAHYA6AnUC6gyUCpQGdDyQE+gEoC5A
XYG6AXUHOhHoJKAeQD2BegH1BuoD1BcoHagfUAZQJlAWUDZQDlAuUB5Qf6B8oAFAA4EGAQ0G
GgI0FGgYkAuoAGg40MlAI4BGAo0COgVoNNAYoFOBTgM6HWgs0DigM4DGA50JNAFoItAkoLOA
zgY6B+hcoPOAzge6AOhCoIuAJgNNAZoKVAg0DWg6UBGQG2gG0EygWUDFQBcDzQYqASoFKgMq
B5oDdAlQBVAlUBXQXKB5QPOBFgAtBFoEdCnQYqAlQJcBLQWqBroc6AqgZUDLgVYA1QD9DWgl
0JVAVwFdDXQN0LVA1wFdD7QK6AagG4FuAroZ6BagW4FuA7od6A6gO4FWA60BugtoLdDdQOuA
1gPdA3Qv0Aag+4DuB9oItAloM9AWoAeA/g70INBDQP8A2gr0MNAjQI8CPQb0T6BtQI8DPQH0
JNBTQNuBngZ6BuhZoH8B7QB6Duh5oBeAdgK9CPQS0MtArwC9CvQa0C6g3UCvA70B9CbQW0Bv
A70D9G+gPUDvAv0H6D2g94E+APoQ6COg/wP6GOgToE+B9gJ9BvQ50BdA+4C+BPoK6Gug/UDf
AH0L9B3QAaDvgf4L9APQQaD/Af0I9BPQz0CHgH4B+hXoN6DDQL8D/QH0J9BfQEeAaoH4pDbd
+x+QCcgMZAGyAsUAxQLFAdmA7EDxQAlAiUBJQA6gZKBWQClArYHaALUFagd0HFB7oA5AHYE6
AXUGSgVKAzoeyAl0AlAXoK5A3YC6A50IdBJQD6CeQL2AegP1AeoLlA7UDygDKBMoCygbKAco
FygPqD9QPtAAoIFAg4AGAw0BGgo0DMgFVAA0HOhkoBFAI4FGAZ0CNBpoDNCpQKcBnQ40Fmgc
0BlA44HOBJoANBFoEtBZQGcDnQN0LtB5QOcDXQB0IdBFQJOBpgBNBSoEmgY0HagIyA00A2gm
0CygYqCLgWYDlQCVApUBlQPNAboEqAKoEqgKaC7QPKD5QAuAFgItAroUaDHQEqDLgJYCVQNd
DnQF0DKg5UArgGqA/ga0EuhKoKuArga6BuhaoOuArgdaBXQD0I1ANwHdDHQL0K1AtwHdDnQH
0J1Aq4HWAN0FtBbobqB1QOuB7gG6F2gD0H1A9wNtBNoEtBloC9ADQH8HehDoIaB/AG0Fehjo
EaBHgR4D+ifQNqDHgZ4AehLoKaDtQE8DPQP0LNC/gHYAPQf0PNALQDuBXgR6CehloFeAXgV6
DWgX0G6g14HeAHoT6C2gt4HeAfo30B6gd4H+A/Qe0PtAHwB9CPQR0P8BfQz0CdCnQHuBPgP6
HOgLoH1AXwJ9BfQ10H6gb4C+BfoO6ADQ90D/BfoB6CDQ/4B+BPoJ6GegQ0C/AP0K9BvQYaDf
gf4A+hPoL6AjQLWCcFmitqap7rJEbZ0KP1qhLYhTFujF61aw8N9ZdAv0NCeUCb5rZTwL9Gzq
wkNljZrB6jyzWJnX2XB1nv7Scbq1c76SENLqPL4UQluTt025TowujLb6j+8TxbU6i1viqTyJ
eZ0cpotrctePA0XalDjEmsaEIFkWFzDLeKrOVjyaNiS/rBHOrzY+cSV47rnuikdt7aI1oG+V
rJB8q9BaeFoLT2vhW6ZvlcSAa+GT/K6FT/RZM25twrXwiRFcC5/UoPuKpG+V+Kivhdf3T9rS
6yTdk5posBbeHtC3Shb5VqH+hLY6/Umabu/bnxzxqQUZPjU+6We+hduf/CXONnZ/khqwP0nz
25+k+rS79hbSn6Q16L4i6Vsl+v2J3aA/SdM9qakG/UmroN8kDMMhpN7zikXUC+pkjDqZQJ5X
+Aomvmnz+WlrHp2MXgJ5XhmkzDiXAh7TGoosnxcbtZPJEuswfRURWpMTrJOJ03Uy+g/whNrJ
ZOs0Zdp11ebWN73cTRb3fdtWNE38YILPvbURm01Na7KybJx5tC1r1RZwjO873oXKomAXX9nJ
uisK9r2jtePjTS6f8NXK0vuV0iYlPL+tqZY5yt98GeAkqQ1fE6q4H3jL/IRynC9BGmHqoxzn
yysPmhI8fy82q39zRwrJcVvrXIsvstwRd1CJh9/NVttbnr+r7d6/x8erf/OFpckxcaf+pEyT
1mu4eC44fYpxn2j6U4I0OUa/SxGPi9G5NNFzGZ3rHoLOzCnuXv+7TFH4RnGOErpGo3NniVI1
Osfd4xzn5xx3/NLbzznuuqOrn3OfBjjH62W7etw7XyKf5idOvjS7o59z4wOcuzjAOb5Us4tS
6fgCPb64b1LhtBK3s6CssGThIncRS5Kkk8tL5pbyT/PESdK8ynRm9hwq4If4MMCpHwawVpLk
lEX7wlS8iiMXFE6XhwgVzsI5cyrKFxSXFla5tTDD2AnwG2fl3NLSwoqFrLV6eGLxzLLiGcXT
C8uqShY6i8RXcqqcPcY7Bzsz0jNyew5jJ6lBzyhz9+VXqZpf3reqsLjEXeS9yPEiNvWjT+Kr
T8VlzunidvoM14L4fJQpRZK8n+ZxTnNXzXe7y5ylyjeLKllH8Rv1E0aKezmRPe38nBmunTH4
5pDBGZ9PAaVJ0rtUXs2qvFolU3k1p/LyvpNl6d7y7pe87+4NsxBNEv201iOnyL9Nk6/XXcSR
KfeAo+Se7iz5yCK557pB7qGelnubT+XNJKk9S3spTe4TOsptf0e5je8ot+Vd2DbFOZL+Q+Qp
Ir0puteFNJ1VTuulY5i35+XntJ5WmWImwnGzpNaT8sGi1nPyIa3WU/K4tJ5RsQiKntDBvL0b
H6lovRlPq9Z7pTBvb9WaeXsn/pxpb+fZDMtAGy62Ecf0VsIQh4svK0dzTvUdLi5R5qjP8QwX
q2PV4eJNylrGlWP8FbMkss9ldSq/5SP1vdZkTzx7E9R4lCFoovo3tx6Pj53qGWpmxHmv60rZ
OzrQtXj4VbY5nt9W29W/eRrmxDs9fycnOMeEN1zsW4/hYt8AQ7TBAYaLJ/s8uOGKUZyTxINq
dG6yeKCNzs0MkM6yAOfmCnW80bllAfLlRhFnJO/9jgDX2xTg3OMB8uw5ca6V4sltFwvnAyA9
JUmP8brOTq8FTJQkucPJyMhmMZKk9GnMKkm9evXiQc9zV/LdJE/fw+ySlJ2Rk+vs48zKyMjl
sfbPzuBhMvPSs/v3cZYNyc3gRzOz0/NzvNg3Kz03K5dfQv5rQE4O/+vdCNyU1c9NWZvqplol
t8CbMu6dd7HI9859xf8OuemKlZsobwM1Sa4Ik+UGZKZ8vEze5soVf5kc7kZdRb5D5k3y9rgc
9jl526b0knrntX1FerVGkzfMg3W9s9YoxjJvY6ZMuxaNF9+0xoqf0xon3iNrjVEC8zY+iczb
2CQzbyPBr6E1CrwX1hoB3gtrlZ4XRqB5Kynh64WzSC9MemHaGkUvnGOoF85pYr1wrl+9sD69
2gvMDPHy4asXziG9MOmFSS9MemHSC1N5kV6Yyiv6euEc0gsfVXrhXN1QUT9cbGegFw5xuBgN
vfCZil44w6MXPij0wvwNoDqGeeJkSV698BydXni8Ti9cHYJeeKtOL7xOpxdepdMLZxyTeuF4
P+emBNALzxIPktG5OQHuYX4AvfCKAPlycxT0wqsDXG9LgHNPBtALv+DRC/OveLzOwlm8FLpe
eLCibsxksahu7MUs/vSNmTnZzj7OzAEZ/Xm8edlZPEzWgPT8ATp944D0vGydvjEzIz2rv6Jv
HJA+IC9L1Qy3yNtqldwib8u4j369kbXD8XJDYpMbjDi5YYiVG4AkuaI75Artrc6rZd4ib0/K
VeeFiGiH40XzNEWnHZ6lm7E8R6cdnq/TDq/QaYdv1mmHV+u0w1t02uEnddphrerz4gikHW4d
VDscxmd/STscCe0w98L+AGmHm5122KLbR0o7nGeoHeZHL21C7XB/v9phfXrNoiniw/0OBtrh
vGNDO8x02mGm0w4znXZYuW/SDpN2mLTDpB2m8iLtMJVXVLTDeaQdPqq0w/11b//64WJ7A+1w
iMPFxpw13FGZNbxjtPb3usQdHu1whk47nCy0w/yNQU53wGspQ0ShHeYyx+79e2p8hne4SLOG
w5g1HOPnXGmAc5UBtMOXB8iXVczrRCtS9357gOttDHBuWwCNup9ZwyHpe3pKkh4DzhrOz8/E
uahyL2CSpHHl/H/UNWblZnBdY1ZujqJrzMzKyud6ycy89Cz9VNS89GydspF3abmZeVyjmZGe
mZfd32DWcL1uKtAE2ya5KZ9Zwy3jpox756aaNRwjNwkxctVPkqu4Q47FW5Fvl3mjvG2TK1R0
Zw3HiHNa48QrcKVOL3y5Ti+sNTbJzNtI8Gts1OmFtUZAP2uYl0AgvXCb8PXCWaQXplnDtDXK
rOF8Q71wfhPPGh7gVy+sT69FNMh8oN/JQC+cT7OGadYw6YVJL0x6YSov0gtTeUVfL5xPeuGj
Si88QPf2rx8udjTQC4c4XKRZwzRrmGYNN2DWcEj6ntD1wuHPQ83KHMDnoeZnZ/J4c3PzxDzU
rCydwrF/es4A/TzUzPT+WWIear7qr+DdlnlbPrOGW8ptGffRNGu4qWYNp1SrxwJ9CyUzpG+h
WHQKJ1IDoyI4Tn6qWyvDiIqYa+yLEgc71HwyM5Mpi0mSJJfMieIpN7Ei+Vkyi+9IrGVXiTLW
/GDXxGnTMRPxgsnVLm2apv7cJvFb7bhFpwwsYlngGHaHS0u8UUwseY6rjfqRXnGgnWcEp8Z5
RNRn7e91bDTzrhXThzpSW1ekIOdvUHLIpFObtvUc0YZVxyl10FgODhN/uLwcF6v+UhIxmEQM
o7b99NeeBamuSQPPrf16ucuFMY3Q8VZhAVHz2MKshmk4D2PYMa1ODGYlhhi5fsex+9gIpn6F
IsgTFlB4mPrFZBRGH5OzQTE9WJ3g085vZn2Y18N+KLVrk5IGU5BQocVrDyteHvpBF96DFPK1
pLCuFXq88WHFG29wD6aQr2UK61qhx5sQVrwJPvcgtYBnSWoBz5LUAp4lUwt4lkwt4FkyNdtn
qXt1jeHI49On71xwds6EYTyKuFjvXav5n8VK6vzGd1/3Xo1Ef/X5yh3y95STlKekmpnN6hdm
VF5mNpslhVcomju/MqyLJ3b1+n8T+5XK3sUeZD3FGCHd36BEvdGMAv6Zyu4imyS/g6VqJZvO
D5BN3Vz+HgQphOpqnE1BsoFFIBtiDbLBRNlQI147cLDdSpH1w7yD5dCzQQopA/xlAwueDUEq
BdNng784rAbZYAn4BrHVcn69skGKVjawMLIhnKfBStlQw/BrwPr3xx0hVIoxrrotg+norxRG
2RAb0afB1KAmsgmfhrhjPRvaVyf4DDC7KGpfMWSutXtuZ1VBV0VJZa8zWNbOn+D5RJxev+us
TlPC3WX907Y28RLHc1anfVHiWIeqwCuQQx5ky0XyP2J3+ig/tZGO73awsVSPoHw5QXwIjx/S
jrdhC2AWYGivKFKAx8TpUvPMxs6IHRB/h22qozL2ovi5tsGOC2JHxl9rm+SQWEY98iyjSfKs
R/Uq3R2blE2b2Vh7pO7vP1vU5qFT1nfzKAyT5MfZBLH7/sImP13JfDaoVCRHyofkJl3N5l+n
N9e5Sk9PlVvDBkjqOnxv3NXJ+ruwKIkNpPrzaHklGDO2CThKQTGLTbuwTVQuzcIRLLxPtuvz
qdZ3054TdeO6aleBfNNiv6pA3fNNyQytnXN5r2ny6LF7uDI8WZnp+as+VSKQptNbJSbYExLW
JEx1zLNnJCxIGOyYbG+fsCqhOVYJSfzDKvHnH3V/r+nQLxxy0jPlloFylZCOiiohRa5KSEdB
lVi3bkMzrBJxbFxMewfvWStiBjvUnpXvec8arSoxTh5Ft5fjX5vo3bsd6nG3oz5VQh1b2OB5
sHmeC1dBL3Ef6ujErCtxEcIVrV44Thm5rI6Zqoxc5st5y0cufG9qRk1OaPlrboL8NbF9Fpct
1jHcHmctsn2RlGZ3WhfbdiXFyFU9yyzy1xl6/maZA1jVopa/3nrepU4bJ9UdPXp+14b1U+5w
ca3aZqyUz12i3Kfm9LN3dYrnjVse3O/QftlHGeqHPNGgr5jSZBGRJSkPwNY8zeJqV6Y4pets
5zFstvx/73oVvDfeQAWfYevp2G7vmDzJNtZxm/0XR4nN7Vhq/8ThLXhLWAVvaYYF342pBc/z
2Kjg1TFCDBQ812GcO6m4qsTtW6oJSqnuTY9OqXrjDVSqhyxv276y/uDoYD1ke966y5FpTbRv
sT7KuyMp/OqcITHnITkhP8i/5/u35VbrK6t3z493kPe7xP6QfPx53Z4fz5T3j4p9otysbBH7
zeK4v1Jdbq5vqeaI6uzyU51NSqmmypfwlir/djlW4lJ3YZlzTFmVu6yyuGqhsy87UfcmUrew
Y5QEN0WRv1p7W20vaYL0Te32WruULgffU/sjayfpKnKPsCpyj17yH7fJ5/l+gry9Kv+t7flx
u/z3drHn1/tG/lvb8+M/Mp4Gdd9OJL+t2O9Rrm9c5NfY61vkF4siv8JPkZuVIo9lJl1F5rqY
8zJFTQ5WuDxpjV+4CaxLzEbHUPvtyaNidjk62quSh8Z+4TDZL5RzwmkR9dkSeuE6Lczy7a+1
tcPkG/W3HxWj1tuOdu++Klk9zvfBfh/5Vpox75BeLc4eSnEmMu8Stj7KDC+YIRpq85wsRluz
GV/cfpryWazoFun45GR7QatRMVXJB2yprYbGXpO8x2ZtFd0i5UV3wObdp7ZSj/N94xepJIpU
8hRpT6VI46FIuVY0wCiqqQu0vatamXe6UrpcaTl6seGsZI0SCR/dX8GcMYHfIkOZjqHXdsrv
yKy6uprt2bOHTZ06VWG+379/v/J3cwrTEoXKh4SEJBw5UG0R2tnvFYWm1tnkaGpcEhKSkOV7
lmxB3WdtC+ydKQyFoTChh/H2rSZd30o5RWEoTH1qkZlqEYWhMA2sRRZ6zyMhqed7nlaLrFSL
SEgaWItiqBaRkDSwFsVSLSIhqZcccFW7lnnmlXjde93rWeemavQ3KL4juQbCdx2Cyq4Cb4g4
hgvS1VUYO1wT4r6TIzt/XmHJR/L+wnaMLfjw+1s/Hvd8RpuXr9503GWWxJWZ38a3/2Fsu/K8
E3cuH5mSvqd31rodGx7akFNz2DL5t7OHXv9mxgXbCn/9rP2F63beuGruxj/uXntk0RHzFy+O
uIBVL+rAlsTdtSTv2dI9e67MLdu8/Pbr3kjLeH/+6rFtfmSbpn93y0XVvXYOKxj8xk2TpX7F
maM/XL5k5Po5wwe1L0zZ8MbD34zN+OuJmMe2L3rzkcOHrr//qg03syN9We1rEzP/qB513/ml
764c0LHHqZe+//j2Kz+48D3r5Vt+e/CRp+buqrnkzYv+KOpveWR4Yeznn0y7ZP2OlCn2wkXl
bxeYL8gbe/DXS58/f/Bl37xcecNva4//On5Lz48fvnnypmd2fLW6/+8X/WGbN+vpA4+f3O/1
sg2H0ys+ybw79ubc059albN5mXPQ+m/G/n559v/GOB86P+7wO2mdjlRty/7svCvmFE2wXznk
8X7jWj82/esnrz3zl0ULBx2esLMmfvWG26fkDjnzCcuQX9/bn/lZ0vaFC/bFzO7w1ejj8i/7
7aL8j1otHX1mzk2zFtzjfuHcpNn//uzl7a9MnLv19bzh2aVf9+izYvnew2fd+vw9Obftvnhw
0ux3rst/eMjgO+Y/lbb7tSsyHq0adTD9xrwb5H/nvXTiA7V9J1+wevSi2Wec8dh/7/l558ju
Q8ac8c5NP3cbMqY8cf/II7VLpNYDr7vyfHdZUYrwEWfS+4gL4yPS5CPOr1QH9hFnquMj7gQx
cysaPuJMLPI+4vhZzUecjXm9u9mZPx9x+lBGPuDsrP4+4rQ7rJ+POLsSW4pcRm1EDGedNvC1
5wanuuaVWD6f++VgF8ZU10dcvEhPO/n39fMRl6DE0J51kPOUfMQFE/IRh0I+4shHHPmIi9Sz
RD7iyEdcw54l1ZdLSp2Rx9HiI87m4yPO3lg+4tQI0OVNa7+Dpfo4RzM1V+dobSgbapj6wRMc
bLd4H3FGlaJdwDeIY8Y52nGUDTWM+a7SOhZ8xJkMsqFDRJ+GZusjruOxng2qjzgTIx9xgZQw
Gje+j7h9wkdcXILqI+5gM/URx5e52kLyEXfJEPt7927t7po1bMKImosGtVQfcb79BvmIC9VH
3LZ41Ufch/Gqj7jn45unjzjuNMIeko84Xx16Eow7mq5KmCJXJUxHQZUgH3GhVolSuQWrlONf
muTdVySrxyuS61MlQvNhlkI+4urZ5ISWv22bxEfcfovLFucYbk+wFtn2JaXZu1kX23ajj7iw
PAyxHo2fv9H2EWcL5CMulIkGzdRHXJiupZpfwQfzEWcnH3Et0EdcPPmIO9Z8xCWQjzjNoVjz
a6VNopW2eYqzV3P3EddB+Ig7JHzEfdwgH3GMed8vo7OPdJGaRZHaPUXa24+PuACjKPIRRz7I
jiqh8iEhIQlHyEccCUnkhHzEURgKQ2HIRxyFoTDkI47CUBjyEUdC0tLe88hHHAlJpGoR+Ygj
IWloLSIfcSQk9RPyEUc+4qLuI86s9xFX5/PeWXU/7+3HRxyfe0Q+4hQBH3EJdXzEmev4iEtV
ci+x2fiI4y+Ymo+4ROb17pbE/PmI04cy8gGXxOrvIy5WNGP18xGXpMTWSW4gU0UMfzzy2MTK
wq6ujw5fdvHTaya4MKZJOlbX5zuUGNLY8cxZTx9xyUoMJ7AurCv5iAsq5CMOhXzEkY848hEX
qWeJfMSRj7iGPUuqL5dOdUYeR4uPuEQfH3FJTekjrrPfwdIx5RwtlbKhRhlE+w62VR9xD4fg
DivHVbepaqY+4o4P+AZxzDhHc1I21Cjvhcbvj8eYj7guEX0amq2PuK7HejaoPuLMjHzEBVLC
aNz4PuKetqs+4vbaVR9xr9ibp4+4WGVBdSg+4lZ8d+YTadZ0j8Kw8X3EmRrDR5xvkshHXKg+
4m4UPuK2CR9xa5upj7g4xVNPKD7iNB36ncO/zp3XdpwrCfyzNV2VkCJXJaSjoEqQj7hQq8S4
GMbay/GvTfTu3Q71uNtRnyoRmg+zTuQjrp5NTmj5m9YkPuL2WVy2WMdwe5y1yPZFUprdaV1s
24U+4pxh+YhzNn7+RttHXGIgH3GhTDRopj7iwip4SzMs+GA+4pLIR1wL9BHnCMFHXBb5iGtJ
PuKSW7CPOBaWQzHW/FrpWNFKJ3qKs09z9xGXLHzEHRA+4vagj7gWX6RxokiTPEXa14+PuACj
KPIRRz7Ijiqh8iEhIQlHyEccCUnkhHzEURgKQ2HIRxyFoTDkI47CUBjyEUdC0tLe88hHHAlJ
pGoR+YgjIWloLSIfcSQk9RPyEUc+4qLuIy5G7yNuuL+p27oPU/rxEaefmnWMC/iIi6vjIy6m
jo+4TsrMrU5R8RGnPx4pH3G8+dF8xKUyr3e3NObPR5w+lJEPuDRWfx9xfMo0n+FWPx9xnZXY
8lh/li9iyJ7jOu0c1sn15VtdPjr87FgXxlTXR1yqEsMANpANqqePuDQlhsFsCBtKPuKCCvmI
QyEfceQjjnzERepZIh9x5COuYc+S6sslr87I42jxEZfq4yMurSl9xPX3O1g6ppyj5VM21CiD
aN/B9jHpI25gwDeIY8Y52iDKhhrlvdD4/fEY8xE3JKJPQ7P1ETf0WM8G1UdcDCMfcYGUMBo3
vo+4Z+NVH3Gfx6s+4l6Lb54+4hyKS4RwfMQVDxzUofP605vARxxrDB9xMT7HyEdcqD7i1ggf
cTuEj7hNzdRHHHcakRaSjzhfHXoSjDuarkqYIlclTEdBlSAfcUe7j7g88hFXzyYntPwd0CQ+
4vZbXLY4x3B7grXIti8pzd7Nuti2m3zEiRCq/5JOgXzEhTLRoJn6iGNhuZYKWmyT5Gf+Jzn+
2+ze/Zpk9fia5KYo+N3CVQ0vV6OC70w+4lqgj7hU8hF3rPmISyMfcc3XoZhDtNKpnuJMb+4+
4joIH3GHhI+4j48xH3HJokjTPEXaz4+PuACjKPIRRz7Ijiqh8iEhIQlHyEccCUnkhHzEURgK
Q2HIRxyFoTDkI47CUBjyEUdC0tLe88hHHAlJpGoR+YgjIWloLSIfcSQk9RPyEUc+4qLoIy6/
2iQeEj7pdHxF+cXu6VXO4rIZ5c5MA0dw+nlXVDfVWVl9dDOh1FlbPG9Urbpd/PNOj+RTI0tZ
B3aTMrVKlVeGG0evHX+Fr/sZ1ttVqswqs4geVa3W5lWxe/4jlSZr7UKZMtFr5II57oriUndZ
lXNEYZWblSutQGb/fv2yMrIymBpcUoInYfAxI+TAyh2pgUxKIJ76ceVV7mnl5bPrBDErQeK8
zw+etiinE+Ey7goMY1XC2NQoqsqnl5fg+RjlvHJAHL+KdfNaM/lC+WGv79491CgXvW1mvsus
LJOqbaBIrv8HAAD//wMA804IdA==</Template></GraphPadPrismFile>
