# Supplementary material for: Sorting nexin-27 regulates AMPA receptor trafficking through the synaptic adhesion protein LRFN2
Source: eLife journal article supplement (doi:10.7554/elife.59432), 2021-07-12
Supplement: fig6-data1 [file elife-59432-fig6-data1-v2.pzfx]

<?xml version="1.0" encoding="UTF-8"?>
<GraphPadPrismFile xmlns="http://graphpad.com/prism/Prism.htm" PrismXMLVersion="5.00">
<Created>
<OriginalVersion CreatedByProgram="GraphPad Prism" CreatedByVersion="9.1.2.226" Login="nskjmm" DateTime="2021-06-17T15:09:38+00:00"/>
<MostRecentVersion CreatedByProgram="GraphPad Prism" CreatedByVersion="9.1.2.226" Login="nskjmm" DateTime="2021-06-17T15:51:24+00:00"/>
</Created>
<InfoSequence>
<Ref ID="Info0" Selected="1"/>
</InfoSequence>
<Info ID="Info0">
<Title>Project info 1</Title>
<Notes/>
<Constant><Name>Experiment Date</Name><Value>2020-12-17</Value></Constant>
<Constant><Name>Experiment ID</Name><Value/></Constant>
<Constant><Name>Notebook ID</Name><Value/></Constant>
<Constant><Name>Project</Name><Value/></Constant>
<Constant><Name>Experimenter</Name><Value/></Constant>
<Constant><Name>Protocol</Name><Value/></Constant>
</Info>

<TableSequence>
<Ref ID="Table13" Selected="1"/>
</TableSequence>
<Table ID="Table13" XFormat="none" TableType="OneWay" EVFormat="AsteriskAfterNumber">
<Title>Fig 6C IF Internal GLUA2 after shRNA</Title>
<YColumn Width="133" Decimals="3" Subcolumns="1">
<Title><B>Control shRNA</B></Title>
<Subcolumn>
<d>29.121</d>
<d>34.501</d>
<d>36.293</d>
<d>40.28</d>
<d>27.698</d>
<d>31.123</d>
<d>19.99</d>
<d>27.73</d>
<d>28.123</d>
<d>22.004</d>
<d>21.002</d>
<d>31.88</d>
<d>26.093</d>
<d>19.361</d>
<d>47.804</d>
<d>36.642</d>
<d>28.443</d>
<d>18.476</d>
<d>23.748</d>
<d>16.777</d>
<d>19.383</d>
<d>23.451</d>
<d>14.096</d>
<d>17.421</d>
<d>15.658</d>
<d>17.933</d>
<d>15.003</d>
<d>16.678</d>
<d>13.208</d>
<d>18.799</d>
<d>15.492</d>
<d>13.699</d>
<d>14.376</d>
<d>14.828</d>
<d>23.341</d>
<d>17.67</d>
<d>12.149</d>
<d>17.16</d>
<d>11.973</d>
<d>15.399</d>
<d>33.34</d>
<d>21.105</d>
<d>19.578</d>
<d>27.846</d>
<d>17.215</d>
<d>20.764</d>
<d>21.817</d>
<d>17.806</d>
<d>20.132</d>
<d>19.346</d>
<d>20.065</d>
<d>19.535</d>
<d>18.567</d>
<d>15.73</d>
<d>18.594</d>
<d>15.017</d>
<d>18.363</d>
<d>12.917</d>
</Subcolumn>
</YColumn>
<YColumn Width="131" Decimals="3" Subcolumns="1">
<Title><B>SNX27 shRNA</B></Title>
<Subcolumn>
<d>36.204</d>
<d>39.374</d>
<d>32.689</d>
<d>38.298</d>
<d>53.327</d>
<d>37.612</d>
<d>27.894</d>
<d>34.352</d>
<d>26.329</d>
<d>32.113</d>
<d>38.235</d>
<d>49.967</d>
<d>24.841</d>
<d>45.177</d>
<d>24.226</d>
<d>23.508</d>
<d>18.697</d>
<d>19.35</d>
<d>28.669</d>
<d>49.79</d>
<d>31.12</d>
<d>21.179</d>
<d>31.485</d>
<d>23.581</d>
<d>28.892</d>
<d>23.071</d>
<d>22.308</d>
<d>20.526</d>
<d>32.604</d>
<d>31.424</d>
<d>24.245</d>
<d>16.253</d>
<d>25.141</d>
<d>22.966</d>
<d>23.365</d>
<d>27.388</d>
<d>32.681</d>
<d>26.171</d>
<d>21.737</d>
<d>16.236</d>
<d>27.306</d>
<d>29.256</d>
<d>36.491</d>
<d>32.554</d>
<d>18.033</d>
<d>22.116</d>
<d>20.781</d>
<d>15.631</d>
<d>16.047</d>
<d>26.645</d>
<d>20.243</d>
<d>15.027</d>
<d>36.441</d>
<d>29.311</d>
<d>31.745</d>
<d>43.544</d>
<d>33.073</d>
<d>29.041</d>
</Subcolumn>
</YColumn>
<YColumn Width="131" Decimals="3" Subcolumns="1">
<Title><B>LRFN2 shRNA</B></Title>
<Subcolumn>
<d>26.628</d>
<d>41.878</d>
<d>35.565</d>
<d>34.689</d>
<d>42.767</d>
<d>37.247</d>
<d>32.754</d>
<d>24.294</d>
<d>37.737</d>
<d>27.524</d>
<d>37.663</d>
<d>25.563</d>
<d>21.236</d>
<d>19.024</d>
<d>17.733</d>
<d>22.155</d>
<d>18.726</d>
<d>19.35</d>
<d>28.669</d>
<d>49.79</d>
<d>31.12</d>
<d>21.179</d>
<d>20.652</d>
<d>15.168</d>
<d>21.158</d>
<d>16.307</d>
<d>18.818</d>
<d>25.901</d>
<d>21.777</d>
<d>19.36</d>
<d>23.351</d>
<d>27.887</d>
<d>32.471</d>
<d>25.497</d>
<d>15.096</d>
<d>16.003</d>
<d>25.09</d>
<d>16.516</d>
<d>19.488</d>
<d>15.333</d>
<d>33.66</d>
<d>25.666</d>
<d>22.667</d>
<d>20.609</d>
<d>19.525</d>
<d>17.682</d>
<d>20.421</d>
<d>21.837</d>
<d>17.778</d>
<d>23.776</d>
<d>19.828</d>
<d>22.427</d>
<d>31.706</d>
<d>21.612</d>
<d>24.347</d>
<d>17.143</d>
<d>18.396</d>
<d>21.152</d>
</Subcolumn>
</YColumn>
</Table>

<!--Analyses, graphs and layouts as compressed binary. Don't edit this part of the file.-->

<Template xmlns:dt="urn:schemas-microsoft-com:datatypes" dt:dt="bin.base64">eNrs3Qd81NQDB/CXW727jrtC2VADQltWbSubYq+MCsiSoYADSntIoQPbskFOZINQUFEUEWQo
TkRERPiDiIgbFRFFcTMUEQRxIPSf9+7lkt/1er0rZZrHJ+S+yUvykpf5Xl7aq0Na2o29U5sJ
rjBCSJFQJOik/zNJf91yMkwasllHIEzVEyJIfTrYWl/qSz+cJJcEGm4k7X0O17l6xRJikH6Z
pO4uqTNK3SlpUeF8mFnqiqVAY8spEPjUtB8exNK0oAUtaEELWtDC5RmM/LqvBS1oQQta0IIW
rtxg1jaBFrSgBS1oQQta0IIWtKAFLWhBC1rQgha0oAUtaEELFRL07P23o5UJ2VWDkN56QroZ
yp5KiUJftztOBGJ0v2lnIEsCXPCSS7TCJhd9LTBE+qe8+Jean5We7WeaFlJXReUi91uFep1Q
j8/H/bphn3E5Q/L8zKit1NXxOZ9KfD461t2alXtXptQVlDKf5lLX2Od8dHw+ejagb1aOs0Ds
4Rwj9s7LSc/1OZ/KftPjzuhbnPmZ6bnppa5XrNTZ/W4fIxvQIT07a0h+lt/5RPqdj/t1j87O
7NHOwqyM9ADzvEhQ5b9jElur5dcScg/7RV9SfdBT+XQ7kSW4d+9it3QgPcjANYf9qi51D5E9
IcoLqeVPLQbtZVUtaEELWtCCFi5+oBfmxzw3vzvJaJ18p6UFLVzMoHO0Zs8xRmIhbaR+9/Tc
3Ka3DssqzHWOEwudBYVi3lAxLesusUUHsUua2CW30Jmfm54t3titX2qSmD5UolgwrHePVGIl
TQR88GNNqHQuT1MqLRC2jdzBJW1vO3tOKWZPNWf4FttImsCDsRIivZ5qlKdB+SmDNkxLZtNb
+ZNmcQDBLE6UYkYHMUVFh3akJnsyipH+PyeZdrH8Nw3LSGfPMy2BWOd8zE09pa/wM5HXlxCl
gZ+eb3W5MYD02MW2q4VvzVCpC+PbOELqbPxZleZIJf78G8W3YVWpq8af4GpIHV27WlJXmz+3
pxCRL9HTtNAU5TlmRJ4yB5t/3/Qho7LT88V8Z8Go7MIC1bSeYFaeMXWeadlcfUfWBRNZH0xk
QzCRjcFENgUTOSSYyOZgIlt8R7aKviJbvSKHin4ihwYTOSyYyOHBRI4IJrItmMj2YCJHBhO5
UjCRKwcTOSqYyFWCiVw1mMjVgolcPZjINYKJXDOYyLWCiVw7mMh1fEdOI52lM4rBbCBihHaj
oQUtXE2Py74ej8t7uzlIuk8ZxG7zAon92+TLtS9vk0H81nUQN79Xmlzejs5jD5vTYs+DyGp2
LRSUs7CnwuIpMkmVP0Z+800vhr3E0enZo5wVtyNsPe16dvri9TcUszt/UmUSH64kQfBKQp9R
OfQJNj89d0SBmFpR6XhkrcOdBMFHEnT+klBh9S57VvAk6HwkQe+VBHiq71dRSdg3iydB7yMJ
Bu8kODOz0nMrLgvIc7UHZrYddD1PgsFHEoy+k1BxVV/DNxc+UH1lW54Eo48kmLyS0DFr6FBn
vjM3w9lGTM0oHOW3tjiQMDGl+Z2bZok8CSYfSQjxk4TOeZl3OQuadnMOy5H2kHImYXb2oTNr
7q7NkxDiScIaT0GGugBIToL63E6CmkIX9BT6oKfQUqWlSkuVliotVVqqtFRpqdJSpaXqv5Kq
cHEqr7oy8qULvEqrPq/yaiV1nbkForyySSve+vTon9TSXSUsji6IFzvk5Rbm52W7h0wONQpG
QQg3Cp41kx/pBdUTk7zGrXnltEmrnL6EldOmC1I5XTXoyulAp7gYldNx5a6cjtMqp7XKaa1y
Wquc1iqntcppLWhBC1rltFY5fXEqp00XsnL6SE5jy2tbJ6X4r5w2XfDK6a4vlFE5bbrgldOb
VpdROW264JXTGxeWUTltuvSV06YLWTl9cHe9/X+fa15G5bTpQlZO717eacPJs4YyKqdNF7Jy
umuYrvGMRSFa5bSWKi1VWqq0VGmp0lKlpUpLlZYqLVVXdOW0SVU5XS3AyuluvdN6JAVQOS1X
fMmP9L4rp82sctpALKQuLU/IzxvuzCgUs3KH5omJYnaWu3o6Iy+3oDA9t7CA10Ef1rs7eeOt
1BGtDlopMvPUQa9ktZoJfG+x8vrNMJ4ROapuktZdth2rAeH55B1oER2tDafHv7g8BMY9zzrB
7zD54A+VB0zWMc8j/fkJRT19mNfSaYmDvFf5+k6WfFKyeQ0/xNI9jK+fW1mg4aARoGxQDigX
lAcaCboblA8qABWCRoFGg8aAxoLGgcaDJoAmgiaB7gFNBrlA94KmgO4DTQVNA00HzQDNBM0C
zQbNAc0F3Q+aB5oPKgItAC0EPQB6EPQQaBHoYdAjoMWgR0GPgZaAHgctBT0BWgZaDnoStAK0
ErQKtBr0FOhp0BrQM6BnQc+Bnge9AHoRtBb0Emgd6GXQetAroA2gV0EbQa+BNoFeB20GbQH9
D7QVtA30Bmg76E3QDtBboJ2gt0G7QO+A3gW9B3of9AHoQ9BHoN2gj0GfgD4F7QF9BtoL+hy0
D/QF6EvQftBXoK9BB0DfgL4FfQf6HvQD6EfQT6CDoEOgw6AjoJ9Bv4COgn4FHQP9BjoOOgH6
HXQSdAr0B+g06E/QX6C/Qf+AzoD+BZ0FnQMVg+gtiCIBpAPpQQaQEWQChYDMIAvICgoFhYHC
QREgG8gOigRVAlUGRYGqgKqCqoGqg2qAaoJqgWqD6oCiQdeARFBdUD3QtaD6oAagGFAsKA7U
ENQI1BjUBNQUFA+6DpQASgQlga4HNQM1B7UAtQS1ArUGtQG1BSWD2oFuAKWAHKBUUHtQB1BH
UCdQGuhGUGdQF1BX0E2gbqDuoB6gnqBeoJtBvUF9QH1B/UC3gG4F9QcNAA0E3Qa6HXQH6E7Q
INBgUDpoCCgDlAlygoaC7gINA2WBhoNGgLJBOaBcUB5oJOhuUD6oAFQIGgUaDRoDGgsaBxoP
mgCaCJoEugc0GeQC3QuaAroPNBU0DTQdNAM0EzQLNBs0BzQXdD9oHmg+qAi0ALQQ9ADoQdBD
oEWgh0GPgBaDHgU9BloCehy0FPQEaBloOehJ0ArQStAq0GrQU6CnQWtAz4CeBT0Heh70AuhF
0FrQS6B1oJdB60GvgDaAXgVtBL0G2gR6HbQZtAX0P9BW0DbQG6DtoDdBO0BvgXaC3gbtAr0D
ehf0Huh90AegD0EfgXaDPgZ9AvoUtAf0GWgv6HPQPtAXoC9B+0Ffgb4GHQB9A/oW9B3oe9AP
oB9BP4EOgg6BDoOOgH4G/QI6CvoVdAz0G+g46ATod9BJ0CnQH6DToD9Bf4H+Bv0DOgP6F3QW
dA5UDKI1TqrnP5AOpAcZQEaQCRQCMoMsICsoFBQGCgdFgGwgOygSVAlUGRQFqgKqCqoGqg6q
AaoJqgWqDaoDigZdAxJBdUH1QNeC6oMagGJAsaA4UENQI1BjUBNQU1A86DpQAigRlAS6HtQM
1BzUAtQS1ArUGtQG1BaUDGoHugGUAnKAUkHtQR1AHUGdQGmgG0GdQV1AXUE3gbqBuoN6gHqC
eoFuBvUG9QH1BfUD3QK6FdQfNAA0EHQb6HbQHaA7QYNAg0HpoCGgDFAmyAkaCroLNAyUBRoO
GgHKBuWAckF5oJGgu0H5oAJQIWgUaDRoDGgsaBxoPGgCaCJoEuge0GSQC3QvaAroPtBU0DTQ
dNAM0EzQLNBs0BzQXND9oHmg+aAi0ALQQtADoAdBD4EWgR4GPQJaDHoU9BhoCehx0FLQE6Bl
oOWgJ0ErQCtBq0CrQU+BngatAT0Dehb0HOh50AugF0FrQS+B1oFeBq0HvQLaAHoVtBH0GmgT
6HXQZtAW0P9AW0HbQG+AtoPeBO0AvQXaCXobtAv0Duhd0Hug90EfgD4EfQTaDfoY9AnoU9Ae
0GegvaDPQftAX4C+BO0HfQX6GnQA9A3oW9B3oO9BP4B+BP0EOgg6BDoMOgL6GfQL6CjoV9Ax
0G+g46AToN9BJ0GnQH+AToP+BP0F+hv0D+gM6F/QWdA5UDGIvtSmev4D6UB6kAFkBJlAISAz
yAKygkJBYaBwUATIBrKDIkGVQJVBUaAqoKqgaqDqoBqgmqBaoNqgOqBo0DUgEVQXVA90Lag+
qAEoBhQLigM1BDUCNQY1ATUFxYOuAyWAEkFJoOtBzUDNQS1ALUGtQK1BbUBtQcmgdqAbQCkg
BygV1B7UAdQR1AmUBroR1BnUBdQVdBOoG6g7qAeoJ6gX6GZQb1AfUF9QP9AtoFtB/UEDQANB
t4FuB90BuhM0CDQYlA4aAsoAZYKcoKGgu0DDQFmg4aARoGxQDigXlAcaCboblA8qABWCRoFG
g8aAxoLGgcaDJoAmgiaB7gFNBrlA94KmgO4DTQVNA00HzQDNBM0CzQbNAc0F3Q+aB5oPKgIt
AC0EPQB6EPQQaBHoYdAjoMWgR0GPgZaAHgctBT0BWgZaDnoStAK0ErQKtBr0FOhp0BrQM6Bn
Qc+Bnge9AHoRtBb0Emgd6GXQetAroA2gV0EbQa+BNoFeB20GbQH9D7QVtA30Bmg76E3QDtBb
oJ2gt0G7QO+A3gW9B3of9AHoQ9BHoN2gj0GfgD4F7QF9BtoL+hy0D/QF6EvQftBXoK9BB0Df
gL4FfQf6HvQD6EfQT6CDoEOgw6AjoJ9Bv4COgn4FHQP9BjoOOgH6HXQSdAr0B+g06E/QX6C/
Qf+AzoD+BZ0FnQMVc4WxxmxykNs00ZYnjsn063jVVe1XaDsVOjSfD7O5knn7F0FpQVVMW644
ifIVMoNq6lCv1iwW9s3ADryNGrGzFm7ucJK1nNPzFnS1+dD5pBdRPmGoXrT8t+19NaYJK6Ph
VxFvFbjQ80WfDWw5JlUcG5837YfzZdXmq6Tn7ftC+OrG82XSj6y04Wlj83C4N1lYGZvM7HeT
0VTdwr4ddD7by1jB2yvKa15hnnWexWMr30sy87aL4dLaNKCPKuX7hq7AaqAdWvtFH+0XDcTh
o/2ile8iibybxls03ae1FbwsuwR+ApDbMiap+qxkQtV+8ZzXUZDgdWhHnaJdyfaL6qNHX6L9
4lk+1spTIX9nWG6/SAJov6hTdXi9kdez5PUmRr7eFDjYXkqX5x4r8JOtPPY+GKvjrTq9x7pP
vDGqFBezaZQTr8C3qZWU/GKw+8Qb4b5WKU22fZyAdfwEbPd5Ala3Co1U5YF3sAZ0AhY8F5TY
INdLgPWiZwbVd9PPa61sFbhWcee9VqoG95fBWpW8EIaJyfxzAuFE+UZfNX62jlUdnTGq33Gq
3/KltIq0xl3JeXyjvo33t7RLfi/AwN8U0663Ja+3xO/3Auh797ST38PWuivjehvo9wLasjeF
Bb/D5PNHG1Uc5XsBbXjrIe/bZ/lMVNb11qy63qo/0Bro9bat6vlOXq77LKxOr5G4P49Cv41S
h59B6WRhXusWxTuLO6121tiReJ4RlrpPjF2I16a4nTVlc9D2SOy5YJv+287y8F46h1d8F2sw
OlN4msWnqzXYMJL9po1X+gpRtCUTazS7W7+RDacvznfUNWHDaaOg47owz++Jevdv2vzXbl5b
Ylm0adA283E2H7o2ay27Pb9dVuV3r1D3b9ocym4ydz3JXu5TP5fRrSB6ZeOP/IpQqYxTjq/p
KvHdxde4aH5B8zWuQQBPeiJfe/V0iXwn8DXPNH6x9DWuH89VX+PG88uer3H0cwWNSxlHG5xf
W8q4b/yMo41aq5Zj3WnDzuhS5kkbFNYsZVwvP+OG+xlHGxjVYzeLtFkJbZIiXaaznWKqdA0f
N96ZSSIEoUNe9qgc+ulWsyCMLognes+gVDqI3hGI6jsCEikIohTkLxCHutlpbHqGdLeQL6aP
HJmfNzYrJ73QKcdJIXVhGrFgVE5Oev44Utk9uE/WXblZQ7My0nMLs8eJmfwrqoViXC8xWUyI
T2jeMIXEuqP2zHU2pUspHJPXtDA9K9uZqSzkGj4390eB+VeBs3LFDL46TdrLUbw+2ltJEJRP
t4pDnIVjnM5cMYd907aA1OTTuD9xyz6KxDdP1VLGtJfH+PgmrY8xXp+KjRaEz7T8uqLyK9Ku
5deVlF/Ko1ob1cPfan76PP9yzb78Oi1fkStJ00ZLy2vA55EoXQHTpCtdP2nIeOnKtUC6Qm2W
rjbfSJ1OcF9ZqgvR0jWhpnTurymd42tK5/J6ZAP7pIf6D1VV4umtpHpciFaVJctXaRNRrrx0
nHylZS9G8HgWolxJrUS5coYS5UoZRpQrYzhRroQ2olzd7ES5mkUS5epViShXq8pEuTrR/Ux+
aG9LlDxQ3y7W5sPUZdsB3i4WsaFiV+/bxUnsze2RntvFb03u28UHWIutmV1Ky2Ya52Yax5DA
pqVJXma0s9/0CSDBRDzzHBzuniet8xBDBntuNYlZtdzIbzv7Wxa7NbWM9EzbyzrSs1xHqN3z
e7f0O7jbxbhy3C7G+blFa+nndvEG4vsvrAUafM2zJ985fY0byHdoX+My+I7ka9wIP+tAczGi
lHEuP9tlPp9nRa77Ij/LW+Vn3Ho/22ULHxfJHmN2ylUr7cuoWqkvCOryv1DVdU5d2hkuCMnS
xSYhIZGECAK7nhGjIDSSAjEIwgBnAZ2mr+fCQ6yCkNT8+lZiE7FZUrNWdL6tklrSOImt469v
2UTMbdecDU1qGd+imcJW8UktWtM5t4xPTEykPz47v/UxlrI+xku1PpH2q2t9fF+Od5KKvxzH
8f9t0rkqRDonKWekntKZZKC092dIZ4YR0rh86Uh3SfHmq47cRZJXSd16Kd4WqdvALovqbyzG
qeoQbPxy3FJ1OZbPgiFEOXuxtwr5kUe7DFXZtHw2CiXK2Yeut0tVlSyfXexEOSvQZchnAXrZ
lY96etmVj3KaD/6qV6tqZcJambDWXQFlwsk+y4STL3GZcLtSy4TV6TUR9wMEvcm/xkeZcLJW
JqyVCWtlwpekTLjDf6DMqsNFKrPqcBHKhLX8uozyK4AyYS2/LqP8Uh5Ck7Uy4cuqTLid6vVC
9e1itI8y4QBvFy9EmXAaKxMWPeWxRbxMmK6aI2xbZ3meRFUmfNyklAnvDhnpKUPeZiZdyioT
dqjKhBNUZcKiqkx47X+yTNhayrgBfso+h/Cdy9e4YX7WIc9PmfAkP9tlrurF/opa9wf9LG+F
n3Hr/GyX1z1lwvSr9zuCKHNUvz3pp0yYFjm2vJ6YoMhROoeUUuDYOqG12ES8vlXLlnSmiYmt
W9HCSe8SxyRppirGt0hqRmecFN+6WWt3ifB5rU3pJaiXZG0i7VfT2vi+EO+4yKXBVulsYZHO
Cibp6A+RjvII6Wi2SUetcsw+KHmF1K2T4r1eIaXBVn5OGKAqDZbPS3TcMFVpcJ6qNHiSqjRY
Pq/YiXI+oMtYoSoNXqcqDZaPb5oLvkuDK7ncF9nzamxjUBUoacW8WNBrlnboyuyyn2+aax0f
nmwzs+2kJ8OEJLJeGqsnjVhG15eyJ1OSnmU1LfWarWoKQKeZbpbvlcJxga7RDvkeSj3uadW9
FR1uUBX2ZZIkT5MRGrY55MT7mhNxDXVEuT8Aw3fFquy1c72n2QQtcIxV/Y5T/V7Gdm4dn696
inPFJUNsGePjyhi/wNPaTVB1VTxDo/hdcVV255tcai4eT5EPEsVmVo7bgM2xs3QX15XPoYbh
loimv8c6Bv+0u97+NV0dOKceKq81uF/Zp3O4iXQj3X2mYQDOYduQEnOIZXPoIZ1aepFVpCN/
o6KMvdJvIKxaqTxz8hVHPSfxvOb0vMv7D6H5/tuM/sLTLA26MmIFNl9rUPOlsZ934DoIAS9L
CGpZgc83NKj5hvpYB13Ay9IFtazA5xsW1HzDvNZBuAr2JeEq2JeEq2Bf0l0F+5LuKtiXdFfs
vtTANZ24/zYw3nn0rHV4/b09bkuhszCHKGvt3v5J7I924jTefeUO0F+Yrvo9hq1hU3aPYWWv
r9TWxfD7O+rRutq6WJUXGmrr4pinsdK9UkNKPc/S3FtkBu/PZH0HeZ405PcM8f5uUghJSKWf
UWjAN1uXUm+eXGyzDfSz2eo7Sma0rtRa88A2WxmbgVTAZgjxsRm6apthOrup9r75fnQxDWtS
lJvn0jZDM0fJU1cgG6C0zUDK3gxlHBREvRn8Lx43Qze/TxRrDcHtDfJmEC7UZiBBbIZg9obu
2maYzp4TfT9PbgvgoOhS6rnhsj4odD42Q88K3RvO7xR5CfeGXv/1zVCd3TKaeVGWexFRyi10
sdWzOkWp17I6PmuJm2d5fF3PNyLUxcOiK5rFe9z4r2Vp+N22N4yidXx4d5u7EDDVRv9u7FSe
/P3s716rC1DlcnHv7vjFKr6Ewpi6/EsYdJA8PIqMhTcFA3tkEfzsJqLDvc0sRBdye+g682Bb
TIgrdJ452RYRMix0tbmvTSAJ5dhmCZdkm8W5ithWElhRn4518tuP3Xw8OsgFiKfO7hl75OCN
jghpd9bB3L2nsEh7l50ME9aTTGmm9K8D6VSVjvTraSVv+ht6Drkl7C+X1oB5u+zqtTCwxPor
CvSUFAtw0o0qJbrRR6Wonnfygi384JIrSEgZ8b02u3o7FXt38n7i7mh5tyNVWmneL0p192nH
NoZ8nnMoy9R5ysLjHAmeTZno+VWeQ8JfyadySERbjlk/tA62tbdUCn3GmmxrZPnHut16JR4S
VaQUxJY4JBLOlpz+0Jk1Jz4Jj/eUqUewKS79ISFU3CEhXAaHxLJlK6/IQ6JNaPPQn8MG2+4M
HRC6MyzZlhaaGnog7Eo8JKpKKYgrcUhEnSk5/Tnp4hCTGO+Y9svNG6N/6iwdErrL4pDQVdwh
obsMDgmXy3UFHhJm0sNU3UZvNvNNyTb3zSbt05vNC3VI9DARUl2a/9Jwpe+0uYc7beU5JNy3
2xY4RVo8e48jtRFbj878hl2vynEew3GhbkzN7Gb+MdNgdjM/Rtq29Gae9nVX0CknsO170yXY
vjqy3uiwtIlob91nzLRUjYi2HjdOtJwLN1npH/Lg2zcu8O2bpC/zfccLsH2V47xeiXOcUPKB
yjNdFLmOreHEYvc5Y6Y07m73HyrhMRq76Os99dkdSH3p1CRP2YQqoFd3mvKXAA08NREs79e2
IOzSQ8+p9KXAeF6DQd9GMZER0v+Ny5Xnynz95XmCpaHtdWtNe19Ld9vD1tO2bIvTNtl6wKbk
uUEMJs8N4pWX5/WJO8/pNvaV5w1Ynpsgz+lrY/37ZhVmO71zNYzl6rfxFyZXlfn6y9U/DDmW
g8Y+9hrGBZbtxuvsicY1lmeM1aRNkCDwIzmIXE0QiPiHlJA+0vS0nyOdsA4alT4dXkPqX8f7
C6Th21V9OjxR6lfj/TXS8GdU/Wr20nOV/hmP8uVqM34kO0o5kmNYrtaVFqHkal1a3sqP36wC
ZyY/hnOc6bliljQ8tyCrcFxT/gVcYykZbmKJvhTZ/k7x4uJGQl/hSPGWYqsgZRvZW/w7aybg
OZiDOoEb4hpJPxZL4xuxJppEWkJxsdynw63S7y28T5d3RPot9+nw3wlNg7tfnSe/Gu/vZcv3
ne1zreXN9uE826eUku2xLNtDiE51MNPSyQGJ/GguK3Np0i5+5oaRhqZhtk7WAfbuprm2utbm
9k4hK20Wax1pS4gGfkwbAs9c0UAMJ/6U4kgrWlq/u3SSmytdCepalX5zu3s47Zc1fcWfqaP4
mTrGk50JLDvDidLwswkrVIbXrQM9Rdv5zRb9MkSOdBOWSxdzQbM00l7NqovsbmpuP2k5IGVp
d/t+y87zzFIzzwJffTnrTlqU/gGepQfspU8n9ys+S6vwLI31ZGkiy9JQyFJaGaL6zsrlm6Gb
7KL1WSlDD9j/tcyI7BRy2v6jJS/y/DLUzjPAV1/OuH8tSn9GpHs47Zc1fcVnaFWeoXGeDE0q
JUNVDSUutwyt7nCxN/NnCveyM1kj0p5kL2EzoU9rU4ho8l8qEMgbaOoKnWXLVtJyD7Jnzx4y
ePBgZto/fPgw+30lxbkag5Y/WtCCFoIJR10GXqL+Kyugli82zeRieS1oQQsBh1+J3YBl2cVX
4dVZi6PF0eIEHke5tupU11ZtS2lxtDjlOYr02lGkxdHinOdRZNCe87SghXI+58lHkVE7irSg
hfM8ikzaUaQFLZznURSiHUVa0EK5wlGHy3Gf570S5QOIKzxNed0l+ivZJ3RpCYR3uxK3HalK
DDPBL7u4W61sc/Q2/y7NbODo9Ozvpb5Qi5CxX/666Ose2xOqT5/zdEjaFMvME7+Z5h6KmRNb
q/KQ7+tZQn6OrPGcw/nCymbTx01YOr5x7bHGlzNqjU6Zl15v5qKp6898+eeIM6cmPJz10abX
jGRsis5Rx/H6tn8+v39TctqKRd1m5j6bPWXnuf3Zyx4JcUQvr7aXLJ7T05F8LGYLufOT3kXr
LRMWdvzukdFrZ3UpavP29JZvnDo0bHfSnvh1X51+ePXslVHkXFOydVSffvtWpr1yy4jPZt1w
9KbeE3a/PHdH9rwfXI5+//St+4NpQMKx12564qjpxkX790VP3tB/yf7BX9zx7o5TER/fo792
TsxfZ8Lrnznz1fxD9U7ckXIsPu6pvm93PfXVF3OyN49bdWDDNekzds5v98Wfn0TVe2vCopPv
/thsYwNjZf3CmFe678od+0/RnQndJlafOWJXs0lZD4/a+sz9i4/XT221p+G0HY/eduvbli8X
nN2zc+jps5t+OnxT97137Mtc9e+6Iye25+0uuCVtvmXMvjfP3jdi96LVtn7zfnh20LSXK7/2
QP0uH8+a8nbXFnMfWtuizj2bZyf3C7ntqNjs07tPv9m7s3np1vfy+z94cOEX0bbtj65v3KOJ
refBr18IeXmT+H6ThyI3z5naXfl3z46Y94oz77jtMfP4ET3nv3rsyVN/dTK2S+25u/IpA+2d
+eFUvUEfXfPK2F+XDXTmZlZytHLp+L5Cm770ys8b7swoFLNyh+aJiT4+m6l+/Uo7RN0vZ6n/
PpL75S26bdyF61b+T3ntlb7ymkNqkAfYG1busKu979nLw3fR5lwpjR057OUyA1H99T6Hvihk
z14hxy6fHnLZ+16dxo505mfl0A/od0wvdJI8djJIbHnddUkJSQnEHV1g0SMwepeOUmS2Ru5I
OhaJpr5HXqFzSF7eiBJR9CyKWdl/cLSBjQ6HxTjzMY6RxbG4Z1GYl5GXjeNNbDwbwIfPZk1I
+KannwRJ+eD992/wtRWVU2crh561fis+zyA4/g8AAP//AwBDvqqd</Template></GraphPadPrismFile>
