# Supplementary material for: Sorting nexin-27 regulates AMPA receptor trafficking through the synaptic adhesion protein LRFN2
Source: eLife journal article supplement (doi:10.7554/elife.59432), 2021-07-12
Supplement: fig7-data1 [file elife-59432-fig7-data1-v2.pzfx]

<?xml version="1.0" encoding="UTF-8"?>
<GraphPadPrismFile xmlns="http://graphpad.com/prism/Prism.htm" PrismXMLVersion="5.00">
<Created>
<OriginalVersion CreatedByProgram="GraphPad Prism" CreatedByVersion="9.1.2.226" Login="nskjmm" DateTime="2021-06-22T14:03:26+00:00"/>
</Created>
<InfoSequence>
<Ref ID="Info0" Selected="1"/>
<Ref ID="Info1"/>
</InfoSequence>
<Info ID="Info0">
<Title>Project info 1</Title>
<Notes/>
<Constant><Name>Experiment Date</Name><Value>2021-06-22</Value></Constant>
<Constant><Name>Experiment ID</Name><Value/></Constant>
<Constant><Name>Notebook ID</Name><Value/></Constant>
<Constant><Name>Project</Name><Value/></Constant>
<Constant><Name>Experimenter</Name><Value/></Constant>
<Constant><Name>Protocol</Name><Value/></Constant>
</Info>

<Info ID="Info1">
<Title>Project info 1</Title>
<Notes/>
<Constant><Name>Experiment Date</Name><Value>2021-06-22</Value></Constant>
<Constant><Name>Experiment ID</Name><Value/></Constant>
<Constant><Name>Notebook ID</Name><Value/></Constant>
<Constant><Name>Project</Name><Value/></Constant>
<Constant><Name>Experimenter</Name><Value/></Constant>
<Constant><Name>Protocol</Name><Value/></Constant>
</Info>

<TableSequence>
<Ref ID="Table0"/>
<Ref ID="Table2"/>
<Ref ID="Table3"/>
<Ref ID="Table4"/>
<Ref ID="Table6"/>
<Ref ID="Table7"/>
<Ref ID="Table8"/>
<Ref ID="Table11"/>
<Ref ID="Table13"/>
<Ref ID="Table14"/>
<Ref ID="Table17"/>
<Ref ID="Table18"/>
<Ref ID="Table21" Selected="1"/>
</TableSequence>
<Table ID="Table0" XFormat="numbers" YFormat="replicates" Replicates="11" TableType="XY" EVFormat="AsteriskAfterNumber">
<Title>Figure 7B</Title>
<SubColumnTitles OwnSet="1">
<Subcolumn>
<d>9524A000C</d>
<d>9524A002P</d>
</Subcolumn>
<Subcolumn>
<d>9524A004P</d>
<d>9524A003C</d>
</Subcolumn>
<Subcolumn>
<d>9529A005P</d>
<d>9529A000P</d>
</Subcolumn>
<Subcolumn>
<d>9529A002C</d>
<d>9529A000C</d>
</Subcolumn>
<Subcolumn>
<d>9531A002P</d>
<d>9603A000P</d>
</Subcolumn>
<Subcolumn>
<d>9603A001C</d>
<d>9603A004C</d>
</Subcolumn>
<Subcolumn>
<d>9603A001P</d>
<d>9612A001P</d>
</Subcolumn>
<Subcolumn>
<d>9612A001C</d>
<d>9612A002P</d>
</Subcolumn>
<Subcolumn>
<d>9612R010C</d>
<d>9613A000P</d>
</Subcolumn>
<Subcolumn>
<d>9613A001C</d>
<d>9613A003P</d>
</Subcolumn>
<Subcolumn>
<d/>
<d>9613A004C</d>
</Subcolumn>
</SubColumnTitles>
<XColumn Width="125" Subcolumns="1" Decimals="0">
<Title>Input (V)</Title>
<Subcolumn>
<d>3</d>
<d>6</d>
<d>9</d>
<d>12</d>
<d>15</d>
<d>18</d>
<d>21</d>
<d>24</d>
<d>27</d>
<d>30</d>
<d>33</d>
<d>36</d>
<d>39</d>
<d>42</d>
<d>45</d>
<d>50</d>
<d>55</d>
<d>60</d>
<d>70</d>
<d>80</d>
<d>90</d>
</Subcolumn>
</XColumn>
<XAdvancedColumn Version="1" Width="125" Decimals="0" Subcolumns="1">
<Title>Input (V)</Title>
<Subcolumn>
<d>3</d>
<d>6</d>
<d>9</d>
<d>12</d>
<d>15</d>
<d>18</d>
<d>21</d>
<d>24</d>
<d>27</d>
<d>30</d>
<d>33</d>
<d>36</d>
<d>39</d>
<d>42</d>
<d>45</d>
<d>50</d>
<d>55</d>
<d>60</d>
<d>70</d>
<d>80</d>
<d>90</d>
</Subcolumn>
</XAdvancedColumn>
<YColumn Width="891" Decimals="3" Subcolumns="11">
<Title>SNX27-Scrambled</Title>
<Subcolumn>
<d>-0.049</d>
<d>-0.061</d>
<d>-0.146</d>
<d>-0.22</d>
<d>-0.269</d>
<d>-0.385</d>
<d>-0.476</d>
<d>-0.604</d>
<d>-0.696</d>
<d>-0.812</d>
<d>-0.977</d>
<d>-1.196</d>
<d>-1.404</d>
<d>-1.483</d>
<d>-1.495</d>
<d>-1.489</d>
<d>-1.489</d>
<d>-1.501</d>
<d>-1.447</d>
<d>-1.385</d>
<d>-1.367</d>
</Subcolumn>
<Subcolumn>
<d>-0.031</d>
<d>-0.031</d>
<d>-0.061</d>
<d>-0.165</d>
<d>-0.25</d>
<d>-0.366</d>
<d>-0.458</d>
<d>-0.494</d>
<d>-0.586</d>
<d>-0.635</d>
<d>-0.659</d>
<d>-0.696</d>
<d>-0.732</d>
<d>-0.745</d>
<d>-0.757</d>
<d>-0.793</d>
<d>-0.806</d>
<d>-0.83</d>
<d>-0.861</d>
<d>-0.928</d>
<d>-0.94</d>
</Subcolumn>
<Subcolumn>
<d>-0.018</d>
<d>-0.037</d>
<d>-0.085</d>
<d>-0.122</d>
<d>-0.146</d>
<d>-0.165</d>
<d>-0.183</d>
<d>-0.208</d>
<d>-0.214</d>
<d>-0.22</d>
<d>-0.25</d>
<d>-0.262</d>
<d>-0.262</d>
<d>-0.299</d>
<d>-0.299</d>
<d>-0.311</d>
<d>-0.366</d>
<d>-0.372</d>
<d>-0.397</d>
<d>-0.421</d>
<d>-0.421</d>
</Subcolumn>
<Subcolumn>
<d>-0.031</d>
<d>-0.043</d>
<d>-0.079</d>
<d>-0.134</d>
<d>-0.177</d>
<d>-0.226</d>
<d>-0.25</d>
<d>-0.287</d>
<d>-0.311</d>
<d>-0.348</d>
<d>-0.385</d>
<d>-0.421</d>
<d>-0.409</d>
<d>-0.427</d>
<d>-0.421</d>
<d>-0.421</d>
<d>-0.421</d>
<d>-0.427</d>
<d>-0.397</d>
<d>-0.36</d>
<d>-0.342</d>
</Subcolumn>
<Subcolumn>
<d>-0.037</d>
<d>-0.085</d>
<d>-0.146</d>
<d>-0.189</d>
<d>-0.226</d>
<d>-0.275</d>
<d>-0.33</d>
<d>-0.36</d>
<d>-0.391</d>
<d>-0.409</d>
<d>-0.433</d>
<d>-0.452</d>
<d>-0.476</d>
<d>-0.494</d>
<d>-0.494</d>
<d>-0.519</d>
<d>-0.519</d>
<d>-0.513</d>
<d>-0.531</d>
<d>-0.507</d>
<d>-0.543</d>
</Subcolumn>
<Subcolumn>
<d>-0.128</d>
<d>-0.311</d>
<d>-0.439</d>
<d>-0.507</d>
<d>-0.555</d>
<d>-0.641</d>
<d>-0.702</d>
<d>-0.72</d>
<d>-0.806</d>
<d>-0.836</d>
<d>-0.885</d>
<d>-0.928</d>
<d>-0.964</d>
<d>-0.958</d>
<d>-1.001</d>
<d>-0.989</d>
<d>-1.056</d>
<d>-1.031</d>
<d>-1.099</d>
<d>-1.086</d>
<d>-1.074</d>
</Subcolumn>
<Subcolumn>
<d>-0.024</d>
<d>-0.061</d>
<d>-0.116</d>
<d>-0.171</d>
<d>-0.22</d>
<d>-0.293</d>
<d>-0.354</d>
<d>-0.409</d>
<d>-0.439</d>
<d>-0.464</d>
<d>-0.476</d>
<d>-0.525</d>
<d>-0.562</d>
<d>-0.58</d>
<d>-0.604</d>
<d>-0.635</d>
<d>-0.629</d>
<d>-0.696</d>
<d>-0.763</d>
<d>-0.781</d>
<d>-0.793</d>
</Subcolumn>
<Subcolumn>
<d>-0.055</d>
<d>-0.11</d>
<d>-0.14</d>
<d>-0.195</d>
<d>-0.275</d>
<d>-0.305</d>
<d>-0.33</d>
<d>-0.342</d>
<d>-0.36</d>
<d>-0.415</d>
<d>-0.421</d>
<d>-0.421</d>
<d>-0.439</d>
<d>-0.433</d>
<d>-0.525</d>
<d>-0.58</d>
<d>-0.677</d>
<d>-0.745</d>
<d>-0.818</d>
<d>-0.775</d>
<d>-0.665</d>
</Subcolumn>
<Subcolumn>
<d>-0.061</d>
<d>-0.079</d>
<d>-0.079</d>
<d>-0.098</d>
<d>-0.153</d>
<d>-0.238</d>
<d>-0.214</d>
<d>-0.25</d>
<d>-0.256</d>
<d>-0.293</d>
<d>-0.293</d>
<d>-0.323</d>
<d>-0.348</d>
<d>-0.342</d>
<d>-0.354</d>
<d>-0.336</d>
<d>-0.415</d>
<d>-0.446</d>
<d>-0.458</d>
<d>-0.482</d>
<d>-0.476</d>
</Subcolumn>
<Subcolumn>
<d>-0.067</d>
<d>-0.104</d>
<d>-0.128</d>
<d>-0.146</d>
<d>-0.208</d>
<d>-0.22</d>
<d>-0.226</d>
<d>-0.238</d>
<d>-0.244</d>
<d>-0.232</d>
<d>-0.269</d>
<d>-0.287</d>
<d>-0.299</d>
<d>-0.336</d>
<d>-0.33</d>
<d>-0.354</d>
<d>-0.366</d>
<d>-0.397</d>
<d>-0.458</d>
<d>-0.488</d>
<d>-0.482</d>
</Subcolumn>
<Subcolumn>
<d/>
<d/>
<d/>
<d/>
<d/>
<d/>
<d/>
<d/>
<d/>
<d/>
<d/>
<d/>
<d/>
<d/>
<d/>
<d/>
<d/>
<d/>
<d/>
<d/>
<d/>
</Subcolumn>
</YColumn>
<YColumn Width="891" Decimals="3" Subcolumns="11">
<Title>SNX27-shRNA</Title>
<Subcolumn>
<d>-0.012</d>
<d>-0.018</d>
<d>-0.031</d>
<d>-0.049</d>
<d>-0.049</d>
<d>-0.049</d>
<d>-0.043</d>
<d>-0.043</d>
<d>-0.049</d>
<d>-0.061</d>
<d>-0.049</d>
<d>-0.055</d>
<d>-0.055</d>
<d>-0.061</d>
<d>-0.055</d>
<d>-0.061</d>
<d>-0.055</d>
<d>-0.055</d>
<d>-0.061</d>
<d>-0.055</d>
<d>-0.067</d>
</Subcolumn>
<Subcolumn>
<d>-0.049</d>
<d>-0.049</d>
<d>-0.049</d>
<d>-0.043</d>
<d>-0.067</d>
<d>-0.122</d>
<d>-0.098</d>
<d>-0.061</d>
<d>-0.085</d>
<d>-0.092</d>
<d>-0.122</d>
<d>-0.11</d>
<d>-0.134</d>
<d>-0.098</d>
<d>-0.122</d>
<d>-0.11</d>
<d>-0.134</d>
<d>-0.146</d>
<d>-0.128</d>
<d>-0.116</d>
<d>-0.092</d>
</Subcolumn>
<Subcolumn>
<d>-0.024</d>
<d>-0.024</d>
<d>-0.018</d>
<d>-0.024</d>
<d>-0.024</d>
<d>-0.024</d>
<d>-0.031</d>
<d>-0.037</d>
<d>-0.037</d>
<d>-0.031</d>
<d>-0.043</d>
<d>-0.043</d>
<d>-0.055</d>
<d>-0.061</d>
<d>-0.067</d>
<d>-0.073</d>
<d>-0.085</d>
<d>-0.098</d>
<d>-0.11</d>
<d>-0.11</d>
<d>-0.122</d>
</Subcolumn>
<Subcolumn>
<d>-0.018</d>
<d>-0.037</d>
<d>-0.079</d>
<d>-0.067</d>
<d>-0.073</d>
<d>-0.073</d>
<d>-0.073</d>
<d>-0.073</d>
<d>-0.104</d>
<d>-0.098</d>
<d>-0.116</d>
<d>-0.11</d>
<d>-0.122</d>
<d>-0.104</d>
<d>-0.104</d>
<d>-0.128</d>
<d>-0.128</d>
<d>-0.128</d>
<d>-0.14</d>
<d>-0.116</d>
<d>-0.104</d>
</Subcolumn>
<Subcolumn>
<d>-0.024</d>
<d>-0.031</d>
<d>-0.055</d>
<d>-0.073</d>
<d>-0.104</d>
<d>-0.104</d>
<d>-0.11</d>
<d>-0.116</d>
<d>-0.128</d>
<d>-0.14</d>
<d>-0.14</d>
<d>-0.159</d>
<d>-0.159</d>
<d>-0.183</d>
<d>-0.171</d>
<d>-0.177</d>
<d>-0.189</d>
<d>-0.201</d>
<d>-0.22</d>
<d>-0.232</d>
<d>-0.25</d>
</Subcolumn>
<Subcolumn>
<d>-0.092</d>
<d>-0.116</d>
<d>-0.171</d>
<d>-0.159</d>
<d>-0.208</d>
<d>-0.25</d>
<d>-0.244</d>
<d>-0.336</d>
<d>-0.293</d>
<d>-0.33</d>
<d>-0.299</d>
<d>-0.323</d>
<d>-0.323</d>
<d>-0.317</d>
<d>-0.348</d>
<d>-0.354</d>
<d>-0.378</d>
<d>-0.385</d>
<d>-0.36</d>
<d>-0.348</d>
<d>-0.33</d>
</Subcolumn>
<Subcolumn>
<d>-0.024</d>
<d>-0.024</d>
<d>-0.024</d>
<d>-0.018</d>
<d>-0.049</d>
<d>-0.055</d>
<d>-0.061</d>
<d>-0.067</d>
<d>-0.085</d>
<d>-0.085</d>
<d>-0.085</d>
<d>-0.098</d>
<d>-0.104</d>
<d>-0.104</d>
<d>-0.128</d>
<d>-0.122</d>
<d>-0.153</d>
<d>-0.189</d>
<d>-0.281</d>
<d>-0.25</d>
<d>-0.269</d>
</Subcolumn>
<Subcolumn>
<d>-0.031</d>
<d>-0.024</d>
<d>-0.031</d>
<d>-0.043</d>
<d>-0.043</d>
<d>-0.055</d>
<d>-0.067</d>
<d>-0.092</d>
<d>-0.116</d>
<d>-0.128</d>
<d>-0.146</d>
<d>-0.189</d>
<d>-0.189</d>
<d>-0.226</d>
<d>-0.214</d>
<d>-0.25</d>
<d>-0.281</d>
<d>-0.299</d>
<d>-0.317</d>
<d>-0.336</d>
<d>-0.372</d>
</Subcolumn>
<Subcolumn>
<d>-0.037</d>
<d>-0.024</d>
<d>-0.024</d>
<d>-0.043</d>
<d>-0.049</d>
<d>-0.049</d>
<d>-0.055</d>
<d>-0.055</d>
<d>-0.067</d>
<d>-0.085</d>
<d>-0.085</d>
<d>-0.098</d>
<d>-0.085</d>
<d>-0.085</d>
<d>-0.079</d>
<d>-0.098</d>
<d>-0.092</d>
<d>-0.098</d>
<d>-0.116</d>
<d>-0.153</d>
<d>-0.146</d>
</Subcolumn>
<Subcolumn>
<d>-0.037</d>
<d>-0.024</d>
<d>-0.031</d>
<d>-0.043</d>
<d>-0.049</d>
<d>-0.061</d>
<d>-0.067</d>
<d>-0.067</d>
<d>-0.073</d>
<d>-0.079</d>
<d>-0.079</d>
<d>-0.079</d>
<d>-0.098</d>
<d>-0.098</d>
<d>-0.098</d>
<d>-0.116</d>
<d>-0.122</d>
<d>-0.116</d>
<d>-0.14</d>
<d>-0.14</d>
<d>-0.165</d>
</Subcolumn>
<Subcolumn>
<d>-0.073</d>
<d>-0.122</d>
<d>-0.14</d>
<d>-0.153</d>
<d>-0.171</d>
<d>-0.195</d>
<d>-0.208</d>
<d>-0.195</d>
<d>-0.232</d>
<d>-0.214</d>
<d>-0.214</d>
<d>-0.232</d>
<d>-0.232</d>
<d>-0.226</d>
<d>-0.226</d>
<d>-0.238</d>
<d>-0.238</d>
<d>-0.25</d>
<d>-0.262</d>
<d>-0.311</d>
<d>-0.293</d>
</Subcolumn>
</YColumn>
</Table>
<Table ID="Table2" XFormat="numbers" YFormat="replicates" Replicates="1" TableType="XY" EVFormat="AsteriskAfterNumber">
<Title>Figure 7C control</Title>
<XColumn Width="125" Subcolumns="1" Decimals="6">
<Title>Time (ms)</Title>
<Subcolumn>
<d>0</d>
<d>0.05</d>
<d>0.1</d>
<d>0.15</d>
<d>0.2</d>
<d>0.25</d>
<d>0.3</d>
<d>0.35</d>
<d>0.4</d>
<d>0.45</d>
<d>0.5</d>
<d>0.55</d>
<d>0.6</d>
<d>0.65</d>
<d>0.7</d>
<d>0.75</d>
<d>0.8</d>
<d>0.85</d>
<d>0.9</d>
<d>0.95</d>
<d>1</d>
<d>1.05</d>
<d>1.1</d>
<d>1.15</d>
<d>1.2</d>
<d>1.25</d>
<d>1.3</d>
<d>1.35</d>
<d>1.4</d>
<d>1.45</d>
<d>1.5</d>
<d>1.55</d>
<d>1.6</d>
<d>1.65</d>
<d>1.7</d>
<d>1.75</d>
<d>1.8</d>
<d>1.85</d>
<d>1.9</d>
<d>1.95</d>
<d>2</d>
<d>2.05</d>
<d>2.1</d>
<d>2.15</d>
<d>2.2</d>
<d>2.25</d>
<d>2.3</d>
<d>2.35</d>
<d>2.4</d>
<d>2.45</d>
<d>2.5</d>
<d>2.55</d>
<d>2.6</d>
<d>2.65</d>
<d>2.7</d>
<d>2.75</d>
<d>2.8</d>
<d>2.85</d>
<d>2.9</d>
<d>2.95</d>
<d>3</d>
<d>3.05</d>
<d>3.1</d>
<d>3.15</d>
<d>3.2</d>
<d>3.25</d>
<d>3.3</d>
<d>3.35</d>
<d>3.4</d>
<d>3.45</d>
<d>3.5</d>
<d>3.55</d>
<d>3.6</d>
<d>3.65</d>
<d>3.7</d>
<d>3.75</d>
<d>3.8</d>
<d>3.85</d>
<d>3.9</d>
<d>3.95</d>
<d>4</d>
<d>4.05</d>
<d>4.1</d>
<d>4.15</d>
<d>4.2</d>
<d>4.25</d>
<d>4.3</d>
<d>4.35</d>
<d>4.4</d>
<d>4.45</d>
<d>4.5</d>
<d>4.55</d>
<d>4.6</d>
<d>4.65</d>
<d>4.7</d>
<d>4.75</d>
<d>4.8</d>
<d>4.85</d>
<d>4.9</d>
<d>4.95</d>
<d>5</d>
<d>5.05</d>
<d>5.1</d>
<d>5.15</d>
<d>5.2</d>
<d>5.25</d>
<d>5.3</d>
<d>5.35</d>
<d>5.4</d>
<d>5.45</d>
<d>5.5</d>
<d>5.55</d>
<d>5.6</d>
<d>5.65</d>
<d>5.7</d>
<d>5.75</d>
<d>5.8</d>
<d>5.85</d>
<d>5.9</d>
<d>5.95</d>
<d>6</d>
<d>6.05</d>
<d>6.1</d>
<d>6.15</d>
<d>6.2</d>
<d>6.25</d>
<d>6.3</d>
<d>6.35</d>
<d>6.4</d>
<d>6.45</d>
<d>6.5</d>
<d>6.55</d>
<d>6.6</d>
<d>6.65</d>
<d>6.7</d>
<d>6.75</d>
<d>6.8</d>
<d>6.85</d>
<d>6.9</d>
<d>6.95</d>
<d>7</d>
<d>7.05</d>
<d>7.1</d>
<d>7.15</d>
<d>7.2</d>
<d>7.25</d>
<d>7.3</d>
<d>7.35</d>
<d>7.4</d>
<d>7.45</d>
<d>7.5</d>
<d>7.55</d>
<d>7.6</d>
<d>7.65</d>
<d>7.7</d>
<d>7.75</d>
<d>7.8</d>
<d>7.85</d>
<d>7.9</d>
<d>7.95</d>
<d>8</d>
<d>8.05</d>
<d>8.1</d>
<d>8.15</d>
<d>8.2</d>
<d>8.25</d>
<d>8.3</d>
<d>8.35</d>
<d>8.4</d>
<d>8.45</d>
<d>8.5</d>
<d>8.55</d>
<d>8.6</d>
<d>8.65</d>
<d>8.7</d>
<d>8.75</d>
<d>8.8</d>
<d>8.85</d>
<d>8.9</d>
<d>8.95</d>
<d>9</d>
<d>9.05</d>
<d>9.1</d>
<d>9.15</d>
<d>9.2</d>
<d>9.25</d>
<d>9.3</d>
<d>9.35</d>
<d>9.4</d>
<d>9.45</d>
<d>9.5</d>
<d>9.55</d>
<d>9.6</d>
<d>9.65</d>
<d>9.7</d>
<d>9.75</d>
<d>9.8</d>
<d>9.85</d>
<d>9.9</d>
<d>9.95</d>
<d>10</d>
<d>10.05</d>
<d>10.1</d>
<d>10.15</d>
<d>10.2</d>
<d>10.25</d>
<d>10.3</d>
<d>10.35</d>
<d>10.4</d>
<d>10.45</d>
<d>10.5</d>
<d>10.55</d>
<d>10.6</d>
<d>10.65</d>
<d>10.7</d>
<d>10.75</d>
<d>10.8</d>
<d>10.85</d>
<d>10.9</d>
<d>10.95</d>
<d>11</d>
<d>11.05</d>
<d>11.1</d>
<d>11.15</d>
<d>11.2</d>
<d>11.25</d>
<d>11.3</d>
<d>11.35</d>
<d>11.4</d>
<d>11.45</d>
<d>11.5</d>
<d>11.55</d>
<d>11.6</d>
<d>11.65</d>
<d>11.7</d>
<d>11.75</d>
<d>11.8</d>
<d>11.85</d>
<d>11.9</d>
<d>11.95</d>
<d>12</d>
<d>12.05</d>
<d>12.1</d>
<d>12.15</d>
<d>12.2</d>
<d>12.25</d>
<d>12.3</d>
<d>12.35</d>
<d>12.4</d>
<d>12.45</d>
<d>12.5</d>
<d>12.55</d>
<d>12.6</d>
<d>12.65</d>
<d>12.7</d>
<d>12.75</d>
<d>12.8</d>
<d>12.85</d>
<d>12.9</d>
<d>12.95</d>
<d>13</d>
<d>13.05</d>
<d>13.1</d>
<d>13.15</d>
<d>13.2</d>
<d>13.25</d>
<d>13.3</d>
<d>13.35</d>
<d>13.4</d>
<d>13.45</d>
<d>13.5</d>
<d>13.55</d>
<d>13.6</d>
<d>13.65</d>
<d>13.7</d>
<d>13.75</d>
<d>13.8</d>
<d>13.85</d>
<d>13.9</d>
<d>13.95</d>
<d>14</d>
<d>14.05</d>
<d>14.1</d>
<d>14.15</d>
<d>14.2</d>
<d>14.25</d>
<d>14.3</d>
<d>14.35</d>
<d>14.4</d>
<d>14.45</d>
<d>14.5</d>
<d>14.55</d>
<d>14.6</d>
<d>14.65</d>
<d>14.7</d>
<d>14.75</d>
<d>14.8</d>
<d>14.85</d>
<d>14.9</d>
<d>14.95</d>
<d>15</d>
<d>15.05</d>
<d>15.1</d>
<d>15.15</d>
<d>15.2</d>
<d>15.25</d>
<d>15.3</d>
<d>15.35</d>
<d>15.4</d>
<d>15.45</d>
<d>15.5</d>
<d>15.55</d>
<d>15.6</d>
<d>15.65</d>
<d>15.7</d>
<d>15.75</d>
<d>15.8</d>
<d>15.85</d>
<d>15.9</d>
<d>15.95</d>
<d>16</d>
<d>16.049999</d>
<d>16.1</d>
<d>16.15</d>
<d>16.200001</d>
<d>16.25</d>
<d>16.299999</d>
<d>16.35</d>
<d>16.4</d>
<d>16.450001</d>
<d>16.5</d>
<d>16.549999</d>
<d>16.6</d>
<d>16.65</d>
<d>16.700001</d>
<d>16.75</d>
<d>16.799999</d>
<d>16.85</d>
<d>16.9</d>
<d>16.950001</d>
<d>17</d>
<d>17.049999</d>
<d>17.1</d>
<d>17.15</d>
<d>17.200001</d>
<d>17.25</d>
<d>17.299999</d>
<d>17.35</d>
<d>17.4</d>
<d>17.450001</d>
<d>17.5</d>
<d>17.549999</d>
<d>17.6</d>
<d>17.65</d>
<d>17.700001</d>
<d>17.75</d>
<d>17.799999</d>
<d>17.85</d>
<d>17.9</d>
<d>17.950001</d>
<d>18</d>
<d>18.049999</d>
<d>18.1</d>
<d>18.15</d>
<d>18.200001</d>
<d>18.25</d>
<d>18.299999</d>
<d>18.35</d>
<d>18.4</d>
<d>18.450001</d>
<d>18.5</d>
<d>18.549999</d>
<d>18.6</d>
<d>18.65</d>
<d>18.700001</d>
<d>18.75</d>
<d>18.799999</d>
<d>18.85</d>
<d>18.9</d>
<d>18.950001</d>
<d>19</d>
<d>19.049999</d>
<d>19.1</d>
<d>19.15</d>
<d>19.200001</d>
<d>19.25</d>
<d>19.299999</d>
<d>19.35</d>
<d>19.4</d>
<d>19.450001</d>
<d>19.5</d>
<d>19.549999</d>
<d>19.6</d>
<d>19.65</d>
<d>19.700001</d>
<d>19.75</d>
<d>19.799999</d>
<d>19.85</d>
<d>19.9</d>
<d>19.950001</d>
<d>20</d>
<d>20.049999</d>
<d>20.1</d>
<d>20.15</d>
<d>20.200001</d>
<d>20.25</d>
<d>20.299999</d>
<d>20.35</d>
<d>20.4</d>
<d>20.450001</d>
<d>20.5</d>
<d>20.549999</d>
<d>20.6</d>
<d>20.65</d>
<d>20.700001</d>
<d>20.75</d>
<d>20.799999</d>
<d>20.85</d>
<d>20.9</d>
<d>20.950001</d>
<d>21</d>
<d>21.049999</d>
<d>21.1</d>
<d>21.15</d>
<d>21.200001</d>
<d>21.25</d>
<d>21.299999</d>
<d>21.35</d>
<d>21.4</d>
<d>21.450001</d>
<d>21.5</d>
<d>21.549999</d>
<d>21.6</d>
<d>21.65</d>
<d>21.700001</d>
<d>21.75</d>
<d>21.799999</d>
<d>21.85</d>
<d>21.9</d>
<d>21.950001</d>
<d>22</d>
<d>22.049999</d>
<d>22.1</d>
<d>22.15</d>
<d>22.200001</d>
<d>22.25</d>
<d>22.299999</d>
<d>22.35</d>
<d>22.4</d>
<d>22.450001</d>
<d>22.5</d>
<d>22.549999</d>
<d>22.6</d>
<d>22.65</d>
<d>22.700001</d>
<d>22.75</d>
<d>22.799999</d>
<d>22.85</d>
<d>22.9</d>
<d>22.950001</d>
<d>23</d>
<d>23.049999</d>
<d>23.1</d>
<d>23.15</d>
<d>23.200001</d>
<d>23.25</d>
<d>23.299999</d>
<d>23.35</d>
<d>23.4</d>
<d>23.450001</d>
<d>23.5</d>
<d>23.549999</d>
<d>23.6</d>
<d>23.65</d>
<d>23.700001</d>
<d>23.75</d>
<d>23.799999</d>
<d>23.85</d>
<d>23.9</d>
<d>23.950001</d>
<d>24</d>
<d>24.049999</d>
<d>24.1</d>
<d>24.15</d>
<d>24.200001</d>
<d>24.25</d>
<d>24.299999</d>
<d>24.35</d>
<d>24.4</d>
<d>24.450001</d>
<d>24.5</d>
<d>24.549999</d>
<d>24.6</d>
<d>24.65</d>
<d>24.700001</d>
<d>24.75</d>
<d>24.799999</d>
<d>24.85</d>
<d>24.9</d>
<d>24.950001</d>
<d>25</d>
<d>25.049999</d>
<d>25.1</d>
<d>25.15</d>
<d>25.200001</d>
<d>25.25</d>
<d>25.299999</d>
<d>25.35</d>
<d>25.4</d>
<d>25.450001</d>
<d>25.5</d>
<d>25.549999</d>
<d>25.6</d>
<d>25.65</d>
<d>25.700001</d>
<d>25.75</d>
<d>25.799999</d>
<d>25.85</d>
<d>25.9</d>
<d>25.950001</d>
<d>26</d>
<d>26.049999</d>
<d>26.1</d>
<d>26.15</d>
<d>26.200001</d>
<d>26.25</d>
<d>26.299999</d>
<d>26.35</d>
<d>26.4</d>
<d>26.450001</d>
<d>26.5</d>
<d>26.549999</d>
<d>26.6</d>
<d>26.65</d>
<d>26.700001</d>
<d>26.75</d>
<d>26.799999</d>
<d>26.85</d>
<d>26.9</d>
<d>26.950001</d>
<d>27</d>
<d>27.049999</d>
<d>27.1</d>
<d>27.15</d>
<d>27.200001</d>
<d>27.25</d>
<d>27.299999</d>
<d>27.35</d>
<d>27.4</d>
<d>27.450001</d>
<d>27.5</d>
<d>27.549999</d>
<d>27.6</d>
<d>27.65</d>
<d>27.700001</d>
<d>27.75</d>
<d>27.799999</d>
<d>27.85</d>
<d>27.9</d>
<d>27.950001</d>
<d>28</d>
<d>28.049999</d>
<d>28.1</d>
<d>28.15</d>
<d>28.200001</d>
<d>28.25</d>
<d>28.299999</d>
<d>28.35</d>
<d>28.4</d>
<d>28.450001</d>
<d>28.5</d>
<d>28.549999</d>
<d>28.6</d>
<d>28.65</d>
<d>28.700001</d>
<d>28.75</d>
<d>28.799999</d>
<d>28.85</d>
<d>28.9</d>
<d>28.950001</d>
<d>29</d>
<d>29.049999</d>
<d>29.1</d>
<d>29.15</d>
<d>29.200001</d>
<d>29.25</d>
<d>29.299999</d>
<d>29.35</d>
<d>29.4</d>
<d>29.450001</d>
<d>29.5</d>
<d>29.549999</d>
<d>29.6</d>
<d>29.65</d>
<d>29.700001</d>
<d>29.75</d>
<d>29.799999</d>
<d>29.85</d>
<d>29.9</d>
<d>29.950001</d>
<d>30</d>
<d>30.049999</d>
<d>30.1</d>
<d>30.15</d>
<d>30.200001</d>
<d>30.25</d>
<d>30.299999</d>
<d>30.35</d>
<d>30.4</d>
<d>30.450001</d>
<d>30.5</d>
<d>30.549999</d>
<d>30.6</d>
<d>30.65</d>
<d>30.700001</d>
<d>30.75</d>
<d>30.799999</d>
<d>30.85</d>
<d>30.9</d>
<d>30.950001</d>
<d>31</d>
<d>31.049999</d>
<d>31.1</d>
<d>31.15</d>
<d>31.200001</d>
<d>31.25</d>
<d>31.299999</d>
<d>31.35</d>
<d>31.4</d>
<d>31.450001</d>
<d>31.5</d>
<d>31.549999</d>
<d>31.6</d>
<d>31.65</d>
<d>31.700001</d>
<d>31.75</d>
<d>31.799999</d>
<d>31.85</d>
<d>31.9</d>
<d>31.950001</d>
<d>32</d>
<d>32.049999</d>
<d>32.099998</d>
<d>32.150002</d>
<d>32.200001</d>
<d>32.25</d>
<d>32.299999</d>
<d>32.349998</d>
<d>32.400002</d>
<d>32.450001</d>
<d>32.5</d>
<d>32.549999</d>
<d>32.599998</d>
<d>32.650002</d>
<d>32.700001</d>
<d>32.75</d>
<d>32.799999</d>
<d>32.849998</d>
<d>32.900002</d>
<d>32.950001</d>
<d>33</d>
<d>33.049999</d>
<d>33.099998</d>
<d>33.150002</d>
<d>33.200001</d>
<d>33.25</d>
<d>33.299999</d>
<d>33.349998</d>
<d>33.400002</d>
<d>33.450001</d>
<d>33.5</d>
<d>33.549999</d>
<d>33.599998</d>
<d>33.650002</d>
<d>33.700001</d>
<d>33.75</d>
<d>33.799999</d>
<d>33.849998</d>
<d>33.900002</d>
<d>33.950001</d>
<d>34</d>
<d>34.049999</d>
<d>34.099998</d>
<d>34.150002</d>
<d>34.200001</d>
<d>34.25</d>
<d>34.299999</d>
<d>34.349998</d>
<d>34.400002</d>
<d>34.450001</d>
<d>34.5</d>
<d>34.549999</d>
<d>34.599998</d>
<d>34.650002</d>
<d>34.700001</d>
<d>34.75</d>
<d>34.799999</d>
<d>34.849998</d>
<d>34.900002</d>
<d>34.950001</d>
<d>35</d>
<d>35.049999</d>
<d>35.099998</d>
<d>35.150002</d>
<d>35.200001</d>
<d>35.25</d>
<d>35.299999</d>
<d>35.349998</d>
<d>35.400002</d>
<d>35.450001</d>
<d>35.5</d>
<d>35.549999</d>
<d>35.599998</d>
<d>35.650002</d>
<d>35.700001</d>
<d>35.75</d>
<d>35.799999</d>
<d>35.849998</d>
<d>35.900002</d>
<d>35.950001</d>
<d>36</d>
<d>36.049999</d>
<d>36.099998</d>
<d>36.150002</d>
<d>36.200001</d>
<d>36.25</d>
<d>36.299999</d>
<d>36.349998</d>
<d>36.400002</d>
<d>36.450001</d>
<d>36.5</d>
<d>36.549999</d>
<d>36.599998</d>
<d>36.650002</d>
<d>36.700001</d>
<d>36.75</d>
<d>36.799999</d>
<d>36.849998</d>
<d>36.900002</d>
<d>36.950001</d>
<d>37</d>
<d>37.049999</d>
<d>37.099998</d>
<d>37.150002</d>
<d>37.200001</d>
<d>37.25</d>
<d>37.299999</d>
<d>37.349998</d>
<d>37.400002</d>
<d>37.450001</d>
<d>37.5</d>
<d>37.549999</d>
<d>37.599998</d>
<d>37.650002</d>
<d>37.700001</d>
<d>37.75</d>
<d>37.799999</d>
<d>37.849998</d>
<d>37.900002</d>
<d>37.950001</d>
<d>38</d>
<d>38.049999</d>
<d>38.099998</d>
<d>38.150002</d>
<d>38.200001</d>
<d>38.25</d>
<d>38.299999</d>
<d>38.349998</d>
<d>38.400002</d>
<d>38.450001</d>
<d>38.5</d>
<d>38.549999</d>
<d>38.599998</d>
<d>38.650002</d>
<d>38.700001</d>
<d>38.75</d>
<d>38.799999</d>
<d>38.849998</d>
<d>38.900002</d>
<d>38.950001</d>
<d>39</d>
<d>39.049999</d>
<d>39.099998</d>
<d>39.150002</d>
<d>39.200001</d>
<d>39.25</d>
<d>39.299999</d>
<d>39.349998</d>
<d>39.400002</d>
<d>39.450001</d>
<d>39.5</d>
<d>39.549999</d>
<d>39.599998</d>
<d>39.650002</d>
<d>39.700001</d>
<d>39.75</d>
<d>39.799999</d>
<d>39.849998</d>
<d>39.900002</d>
<d>39.950001</d>
<d>40</d>
<d>40.049999</d>
<d>40.099998</d>
<d>40.150002</d>
<d>40.200001</d>
<d>40.25</d>
<d>40.299999</d>
<d>40.349998</d>
<d>40.400002</d>
<d>40.450001</d>
<d>40.5</d>
<d>40.549999</d>
<d>40.599998</d>
<d>40.650002</d>
<d>40.700001</d>
<d>40.75</d>
<d>40.799999</d>
<d>40.849998</d>
<d>40.900002</d>
<d>40.950001</d>
<d>41</d>
<d>41.049999</d>
<d>41.099998</d>
<d>41.150002</d>
<d>41.200001</d>
<d>41.25</d>
<d>41.299999</d>
<d>41.349998</d>
<d>41.400002</d>
<d>41.450001</d>
<d>41.5</d>
<d>41.549999</d>
<d>41.599998</d>
<d>41.650002</d>
<d>41.700001</d>
<d>41.75</d>
<d>41.799999</d>
<d>41.849998</d>
<d>41.900002</d>
<d>41.950001</d>
<d>42</d>
<d>42.049999</d>
<d>42.099998</d>
<d>42.150002</d>
<d>42.200001</d>
<d>42.25</d>
<d>42.299999</d>
<d>42.349998</d>
<d>42.400002</d>
<d>42.450001</d>
<d>42.5</d>
<d>42.549999</d>
<d>42.599998</d>
<d>42.650002</d>
<d>42.700001</d>
<d>42.75</d>
<d>42.799999</d>
<d>42.849998</d>
<d>42.900002</d>
<d>42.950001</d>
<d>43</d>
<d>43.049999</d>
<d>43.099998</d>
<d>43.150002</d>
<d>43.200001</d>
<d>43.25</d>
<d>43.299999</d>
<d>43.349998</d>
<d>43.400002</d>
<d>43.450001</d>
<d>43.5</d>
<d>43.549999</d>
<d>43.599998</d>
<d>43.650002</d>
<d>43.700001</d>
<d>43.75</d>
<d>43.799999</d>
<d>43.849998</d>
<d>43.900002</d>
<d>43.950001</d>
<d>44</d>
<d>44.049999</d>
<d>44.099998</d>
<d>44.150002</d>
<d>44.200001</d>
<d>44.25</d>
<d>44.299999</d>
<d>44.349998</d>
<d>44.400002</d>
<d>44.450001</d>
<d>44.5</d>
<d>44.549999</d>
<d>44.599998</d>
<d>44.650002</d>
<d>44.700001</d>
<d>44.75</d>
<d>44.799999</d>
<d>44.849998</d>
<d>44.900002</d>
<d>44.950001</d>
<d>45</d>
<d>45.049999</d>
<d>45.099998</d>
<d>45.150002</d>
<d>45.200001</d>
<d>45.25</d>
<d>45.299999</d>
<d>45.349998</d>
<d>45.400002</d>
<d>45.450001</d>
<d>45.5</d>
<d>45.549999</d>
<d>45.599998</d>
<d>45.650002</d>
<d>45.700001</d>
<d>45.75</d>
<d>45.799999</d>
<d>45.849998</d>
<d>45.900002</d>
<d>45.950001</d>
<d>46</d>
<d>46.049999</d>
<d>46.099998</d>
<d>46.150002</d>
<d>46.200001</d>
<d>46.25</d>
<d>46.299999</d>
<d>46.349998</d>
<d>46.400002</d>
<d>46.450001</d>
<d>46.5</d>
<d>46.549999</d>
<d>46.599998</d>
<d>46.650002</d>
<d>46.700001</d>
<d>46.75</d>
<d>46.799999</d>
<d>46.849998</d>
<d>46.900002</d>
<d>46.950001</d>
<d>47</d>
<d>47.049999</d>
<d>47.099998</d>
<d>47.150002</d>
<d>47.200001</d>
<d>47.25</d>
<d>47.299999</d>
<d>47.349998</d>
<d>47.400002</d>
<d>47.450001</d>
<d>47.5</d>
<d>47.549999</d>
<d>47.599998</d>
<d>47.650002</d>
<d>47.700001</d>
<d>47.75</d>
<d>47.799999</d>
<d>47.849998</d>
<d>47.900002</d>
<d>47.950001</d>
<d>48</d>
<d>48.049999</d>
<d>48.099998</d>
<d>48.150002</d>
<d>48.200001</d>
<d>48.25</d>
<d>48.299999</d>
<d>48.349998</d>
<d>48.400002</d>
<d>48.450001</d>
<d>48.5</d>
<d>48.549999</d>
<d>48.599998</d>
<d>48.650002</d>
<d>48.700001</d>
<d>48.75</d>
<d>48.799999</d>
<d>48.849998</d>
<d>48.900002</d>
<d>48.950001</d>
<d>49</d>
<d>49.049999</d>
<d>49.099998</d>
<d>49.150002</d>
<d>49.200001</d>
<d>49.25</d>
<d>49.299999</d>
<d>49.349998</d>
<d>49.400002</d>
<d>49.450001</d>
<d>49.5</d>
<d>49.549999</d>
<d>49.599998</d>
<d>49.650002</d>
<d>49.700001</d>
<d>49.75</d>
<d>49.799999</d>
<d>49.849998</d>
<d>49.900002</d>
<d>49.950001</d>
<d>50</d>
<d>50.049999</d>
<d>50.099998</d>
<d>50.150002</d>
<d>50.200001</d>
<d>50.25</d>
<d>50.299999</d>
<d>50.349998</d>
<d>50.400002</d>
<d>50.450001</d>
<d>50.5</d>
<d>50.549999</d>
<d>50.599998</d>
<d>50.650002</d>
<d>50.700001</d>
<d>50.75</d>
<d>50.799999</d>
<d>50.849998</d>
<d>50.900002</d>
<d>50.950001</d>
<d>51</d>
<d>51.049999</d>
<d>51.099998</d>
<d>51.150002</d>
<d>51.200001</d>
<d>51.25</d>
<d>51.299999</d>
<d>51.349998</d>
<d>51.400002</d>
<d>51.450001</d>
<d>51.5</d>
<d>51.549999</d>
<d>51.599998</d>
<d>51.650002</d>
<d>51.700001</d>
<d>51.75</d>
<d>51.799999</d>
<d>51.849998</d>
<d>51.900002</d>
<d>51.950001</d>
<d>52</d>
<d>52.049999</d>
<d>52.099998</d>
<d>52.150002</d>
<d>52.200001</d>
<d>52.25</d>
<d>52.299999</d>
<d>52.349998</d>
<d>52.400002</d>
<d>52.450001</d>
<d>52.5</d>
<d>52.549999</d>
<d>52.599998</d>
<d>52.650002</d>
<d>52.700001</d>
<d>52.75</d>
<d>52.799999</d>
<d>52.849998</d>
<d>52.900002</d>
<d>52.950001</d>
<d>53</d>
<d>53.049999</d>
<d>53.099998</d>
<d>53.150002</d>
<d>53.200001</d>
<d>53.25</d>
<d>53.299999</d>
<d>53.349998</d>
<d>53.400002</d>
<d>53.450001</d>
<d>53.5</d>
<d>53.549999</d>
<d>53.599998</d>
<d>53.650002</d>
<d>53.700001</d>
<d>53.75</d>
<d>53.799999</d>
<d>53.849998</d>
<d>53.900002</d>
<d>53.950001</d>
<d>54</d>
<d>54.049999</d>
<d>54.099998</d>
<d>54.150002</d>
<d>54.200001</d>
<d>54.25</d>
<d>54.299999</d>
<d>54.349998</d>
<d>54.400002</d>
<d>54.450001</d>
<d>54.5</d>
<d>54.549999</d>
<d>54.599998</d>
<d>54.650002</d>
<d>54.700001</d>
<d>54.75</d>
<d>54.799999</d>
<d>54.849998</d>
<d>54.900002</d>
<d>54.950001</d>
<d>55</d>
<d>55.049999</d>
<d>55.099998</d>
<d>55.150002</d>
<d>55.200001</d>
<d>55.25</d>
<d>55.299999</d>
<d>55.349998</d>
<d>55.400002</d>
<d>55.450001</d>
<d>55.5</d>
<d>55.549999</d>
<d>55.599998</d>
<d>55.650002</d>
<d>55.700001</d>
<d>55.75</d>
<d>55.799999</d>
<d>55.849998</d>
<d>55.900002</d>
<d>55.950001</d>
<d>56</d>
<d>56.049999</d>
<d>56.099998</d>
<d>56.150002</d>
<d>56.200001</d>
<d>56.25</d>
<d>56.299999</d>
<d>56.349998</d>
<d>56.400002</d>
<d>56.450001</d>
<d>56.5</d>
<d>56.549999</d>
<d>56.599998</d>
<d>56.650002</d>
<d>56.700001</d>
<d>56.75</d>
<d>56.799999</d>
<d>56.849998</d>
<d>56.900002</d>
<d>56.950001</d>
<d>57</d>
<d>57.049999</d>
<d>57.099998</d>
<d>57.150002</d>
<d>57.200001</d>
<d>57.25</d>
<d>57.299999</d>
<d>57.349998</d>
<d>57.400002</d>
<d>57.450001</d>
<d>57.5</d>
<d>57.549999</d>
<d>57.599998</d>
<d>57.650002</d>
<d>57.700001</d>
<d>57.75</d>
<d>57.799999</d>
<d>57.849998</d>
<d>57.900002</d>
<d>57.950001</d>
<d>58</d>
<d>58.049999</d>
<d>58.099998</d>
<d>58.150002</d>
<d>58.200001</d>
<d>58.25</d>
<d>58.299999</d>
<d>58.349998</d>
<d>58.400002</d>
<d>58.450001</d>
<d>58.5</d>
<d>58.549999</d>
<d>58.599998</d>
<d>58.650002</d>
<d>58.700001</d>
<d>58.75</d>
<d>58.799999</d>
<d>58.849998</d>
<d>58.900002</d>
<d>58.950001</d>
<d>59</d>
<d>59.049999</d>
<d>59.099998</d>
<d>59.150002</d>
<d>59.200001</d>
<d>59.25</d>
<d>59.299999</d>
<d>59.349998</d>
<d>59.400002</d>
<d>59.450001</d>
<d>59.5</d>
<d>59.549999</d>
<d>59.599998</d>
<d>59.650002</d>
<d>59.700001</d>
<d>59.75</d>
<d>59.799999</d>
<d>59.849998</d>
<d>59.900002</d>
<d>59.950001</d>
<d>60</d>
<d>60.049999</d>
<d>60.099998</d>
<d>60.150002</d>
<d>60.200001</d>
<d>60.25</d>
<d>60.299999</d>
<d>60.349998</d>
<d>60.400002</d>
<d>60.450001</d>
<d>60.5</d>
<d>60.549999</d>
<d>60.599998</d>
<d>60.650002</d>
<d>60.700001</d>
<d>60.75</d>
<d>60.799999</d>
<d>60.849998</d>
<d>60.900002</d>
<d>60.950001</d>
<d>61</d>
<d>61.049999</d>
<d>61.099998</d>
<d>61.150002</d>
<d>61.200001</d>
<d>61.25</d>
<d>61.299999</d>
<d>61.349998</d>
<d>61.400002</d>
<d>61.450001</d>
<d>61.5</d>
<d>61.549999</d>
<d>61.599998</d>
<d>61.650002</d>
<d>61.700001</d>
<d>61.75</d>
<d>61.799999</d>
<d>61.849998</d>
<d>61.900002</d>
<d>61.950001</d>
<d>62</d>
<d>62.049999</d>
<d>62.099998</d>
<d>62.150002</d>
<d>62.200001</d>
<d>62.25</d>
<d>62.299999</d>
<d>62.349998</d>
<d>62.400002</d>
<d>62.450001</d>
<d>62.5</d>
<d>62.549999</d>
<d>62.599998</d>
<d>62.650002</d>
<d>62.700001</d>
<d>62.75</d>
<d>62.799999</d>
<d>62.849998</d>
<d>62.900002</d>
<d>62.950001</d>
<d>63</d>
<d>63.049999</d>
<d>63.099998</d>
<d>63.150002</d>
<d>63.200001</d>
<d>63.25</d>
<d>63.299999</d>
<d>63.349998</d>
<d>63.400002</d>
<d>63.450001</d>
<d>63.5</d>
<d>63.549999</d>
<d>63.599998</d>
<d>63.650002</d>
<d>63.700001</d>
<d>63.75</d>
<d>63.799999</d>
<d>63.849998</d>
<d>63.900002</d>
<d>63.950001</d>
<d>64</d>
<d>64.050003</d>
<d>64.099998</d>
<d>64.150002</d>
<d>64.199997</d>
<d>64.25</d>
<d>64.300003</d>
<d>64.349998</d>
<d>64.400002</d>
<d>64.449997</d>
<d>64.5</d>
<d>64.550003</d>
<d>64.599998</d>
<d>64.650002</d>
<d>64.699997</d>
<d>64.75</d>
<d>64.800003</d>
<d>64.849998</d>
<d>64.900002</d>
<d>64.949997</d>
<d>65</d>
<d>65.050003</d>
<d>65.099998</d>
<d>65.150002</d>
<d>65.199997</d>
<d>65.25</d>
<d>65.300003</d>
<d>65.349998</d>
<d>65.400002</d>
<d>65.449997</d>
<d>65.5</d>
<d>65.550003</d>
<d>65.599998</d>
<d>65.650002</d>
<d>65.699997</d>
<d>65.75</d>
<d>65.800003</d>
<d>65.849998</d>
<d>65.900002</d>
<d>65.949997</d>
<d>66</d>
<d>66.050003</d>
<d>66.099998</d>
<d>66.150002</d>
<d>66.199997</d>
<d>66.25</d>
<d>66.300003</d>
<d>66.349998</d>
<d>66.400002</d>
<d>66.449997</d>
<d>66.5</d>
<d>66.550003</d>
<d>66.599998</d>
<d>66.650002</d>
<d>66.699997</d>
<d>66.75</d>
<d>66.800003</d>
<d>66.849998</d>
<d>66.900002</d>
<d>66.949997</d>
<d>67</d>
<d>67.050003</d>
<d>67.099998</d>
<d>67.150002</d>
<d>67.199997</d>
<d>67.25</d>
<d>67.300003</d>
<d>67.349998</d>
<d>67.400002</d>
<d>67.449997</d>
<d>67.5</d>
<d>67.550003</d>
<d>67.599998</d>
<d>67.650002</d>
<d>67.699997</d>
<d>67.75</d>
<d>67.800003</d>
<d>67.849998</d>
<d>67.900002</d>
<d>67.949997</d>
<d>68</d>
<d>68.050003</d>
<d>68.099998</d>
<d>68.150002</d>
<d>68.199997</d>
<d>68.25</d>
<d>68.300003</d>
<d>68.349998</d>
<d>68.400002</d>
<d>68.449997</d>
<d>68.5</d>
<d>68.550003</d>
<d>68.599998</d>
<d>68.650002</d>
<d>68.699997</d>
<d>68.75</d>
<d>68.800003</d>
<d>68.849998</d>
<d>68.900002</d>
<d>68.949997</d>
<d>69</d>
<d>69.050003</d>
<d>69.099998</d>
<d>69.150002</d>
<d>69.199997</d>
<d>69.25</d>
<d>69.300003</d>
<d>69.349998</d>
<d>69.400002</d>
<d>69.449997</d>
<d>69.5</d>
<d>69.550003</d>
<d>69.599998</d>
<d>69.650002</d>
<d>69.699997</d>
<d>69.75</d>
<d>69.800003</d>
<d>69.849998</d>
<d>69.900002</d>
<d>69.949997</d>
<d>70</d>
<d>70.050003</d>
<d>70.099998</d>
<d>70.150002</d>
<d>70.199997</d>
<d>70.25</d>
<d>70.300003</d>
<d>70.349998</d>
<d>70.400002</d>
<d>70.449997</d>
<d>70.5</d>
<d>70.550003</d>
<d>70.599998</d>
<d>70.650002</d>
<d>70.699997</d>
<d>70.75</d>
<d>70.800003</d>
<d>70.849998</d>
<d>70.900002</d>
<d>70.949997</d>
<d>71</d>
<d>71.050003</d>
<d>71.099998</d>
<d>71.150002</d>
<d>71.199997</d>
<d>71.25</d>
<d>71.300003</d>
<d>71.349998</d>
<d>71.400002</d>
<d>71.449997</d>
<d>71.5</d>
<d>71.550003</d>
<d>71.599998</d>
<d>71.650002</d>
<d>71.699997</d>
<d>71.75</d>
<d>71.800003</d>
<d>71.849998</d>
<d>71.900002</d>
<d>71.949997</d>
<d>72</d>
<d>72.050003</d>
<d>72.099998</d>
<d>72.150002</d>
<d>72.199997</d>
<d>72.25</d>
<d>72.300003</d>
<d>72.349998</d>
<d>72.400002</d>
<d>72.449997</d>
<d>72.5</d>
<d>72.550003</d>
<d>72.599998</d>
<d>72.650002</d>
<d>72.699997</d>
<d>72.75</d>
<d>72.800003</d>
<d>72.849998</d>
<d>72.900002</d>
<d>72.949997</d>
<d>73</d>
<d>73.050003</d>
<d>73.099998</d>
<d>73.150002</d>
<d>73.199997</d>
<d>73.25</d>
<d>73.300003</d>
<d>73.349998</d>
<d>73.400002</d>
<d>73.449997</d>
<d>73.5</d>
<d>73.550003</d>
<d>73.599998</d>
<d>73.650002</d>
<d>73.699997</d>
<d>73.75</d>
<d>73.800003</d>
<d>73.849998</d>
<d>73.900002</d>
<d>73.949997</d>
<d>74</d>
<d>74.050003</d>
<d>74.099998</d>
<d>74.150002</d>
<d>74.199997</d>
<d>74.25</d>
<d>74.300003</d>
<d>74.349998</d>
<d>74.400002</d>
<d>74.449997</d>
<d>74.5</d>
<d>74.550003</d>
<d>74.599998</d>
<d>74.650002</d>
<d>74.699997</d>
<d>74.75</d>
<d>74.800003</d>
<d>74.849998</d>
<d>74.900002</d>
<d>74.949997</d>
<d>75</d>
<d>75.050003</d>
<d>75.099998</d>
<d>75.150002</d>
<d>75.199997</d>
<d>75.25</d>
<d>75.300003</d>
<d>75.349998</d>
<d>75.400002</d>
<d>75.449997</d>
<d>75.5</d>
<d>75.550003</d>
<d>75.599998</d>
<d>75.650002</d>
<d>75.699997</d>
<d>75.75</d>
<d>75.800003</d>
<d>75.849998</d>
<d>75.900002</d>
<d>75.949997</d>
<d>76</d>
<d>76.050003</d>
<d>76.099998</d>
<d>76.150002</d>
<d>76.199997</d>
<d>76.25</d>
<d>76.300003</d>
<d>76.349998</d>
<d>76.400002</d>
<d>76.449997</d>
<d>76.5</d>
<d>76.550003</d>
<d>76.599998</d>
<d>76.650002</d>
<d>76.699997</d>
<d>76.75</d>
<d>76.800003</d>
<d>76.849998</d>
<d>76.900002</d>
<d>76.949997</d>
<d>77</d>
<d>77.050003</d>
<d>77.099998</d>
<d>77.150002</d>
<d>77.199997</d>
<d>77.25</d>
<d>77.300003</d>
<d>77.349998</d>
<d>77.400002</d>
<d>77.449997</d>
<d>77.5</d>
<d>77.550003</d>
<d>77.599998</d>
<d>77.650002</d>
<d>77.699997</d>
<d>77.75</d>
<d>77.800003</d>
<d>77.849998</d>
<d>77.900002</d>
<d>77.949997</d>
<d>78</d>
<d>78.050003</d>
<d>78.099998</d>
<d>78.150002</d>
<d>78.199997</d>
<d>78.25</d>
<d>78.300003</d>
<d>78.349998</d>
<d>78.400002</d>
<d>78.449997</d>
<d>78.5</d>
<d>78.550003</d>
<d>78.599998</d>
<d>78.650002</d>
<d>78.699997</d>
<d>78.75</d>
<d>78.800003</d>
<d>78.849998</d>
<d>78.900002</d>
<d>78.949997</d>
<d>79</d>
<d>79.050003</d>
<d>79.099998</d>
<d>79.150002</d>
<d>79.199997</d>
<d>79.25</d>
<d>79.300003</d>
<d>79.349998</d>
<d>79.400002</d>
<d>79.449997</d>
<d>79.5</d>
<d>79.550003</d>
<d>79.599998</d>
<d>79.650002</d>
<d>79.699997</d>
<d>79.75</d>
<d>79.800003</d>
<d>79.849998</d>
<d>79.900002</d>
<d>79.949997</d>
<d>80</d>
<d>80.050003</d>
<d>80.099998</d>
<d>80.150002</d>
<d>80.199997</d>
<d>80.25</d>
<d>80.300003</d>
<d>80.349998</d>
<d>80.400002</d>
<d>80.449997</d>
<d>80.5</d>
<d>80.550003</d>
<d>80.599998</d>
<d>80.650002</d>
<d>80.699997</d>
<d>80.75</d>
<d>80.800003</d>
<d>80.849998</d>
<d>80.900002</d>
<d>80.949997</d>
<d>81</d>
<d>81.050003</d>
<d>81.099998</d>
<d>81.150002</d>
<d>81.199997</d>
<d>81.25</d>
<d>81.300003</d>
<d>81.349998</d>
<d>81.400002</d>
<d>81.449997</d>
<d>81.5</d>
<d>81.550003</d>
<d>81.599998</d>
<d>81.650002</d>
<d>81.699997</d>
<d>81.75</d>
<d>81.800003</d>
<d>81.849998</d>
<d>81.900002</d>
<d>81.949997</d>
<d>82</d>
<d>82.050003</d>
<d>82.099998</d>
<d>82.150002</d>
<d>82.199997</d>
<d>82.25</d>
<d>82.300003</d>
<d>82.349998</d>
<d>82.400002</d>
<d>82.449997</d>
<d>82.5</d>
<d>82.550003</d>
<d>82.599998</d>
<d>82.650002</d>
<d>82.699997</d>
<d>82.75</d>
<d>82.800003</d>
<d>82.849998</d>
<d>82.900002</d>
<d>82.949997</d>
<d>83</d>
<d>83.050003</d>
<d>83.099998</d>
<d>83.150002</d>
<d>83.199997</d>
<d>83.25</d>
<d>83.300003</d>
<d>83.349998</d>
<d>83.400002</d>
<d>83.449997</d>
<d>83.5</d>
<d>83.550003</d>
<d>83.599998</d>
<d>83.650002</d>
<d>83.699997</d>
<d>83.75</d>
<d>83.800003</d>
<d>83.849998</d>
<d>83.900002</d>
<d>83.949997</d>
<d>84</d>
<d>84.050003</d>
<d>84.099998</d>
<d>84.150002</d>
<d>84.199997</d>
<d>84.25</d>
<d>84.300003</d>
<d>84.349998</d>
<d>84.400002</d>
<d>84.449997</d>
<d>84.5</d>
<d>84.550003</d>
<d>84.599998</d>
<d>84.650002</d>
<d>84.699997</d>
<d>84.75</d>
<d>84.800003</d>
<d>84.849998</d>
<d>84.900002</d>
<d>84.949997</d>
<d>85</d>
<d>85.050003</d>
<d>85.099998</d>
<d>85.150002</d>
<d>85.199997</d>
<d>85.25</d>
<d>85.300003</d>
<d>85.349998</d>
<d>85.400002</d>
<d>85.449997</d>
<d>85.5</d>
<d>85.550003</d>
<d>85.599998</d>
<d>85.650002</d>
<d>85.699997</d>
<d>85.75</d>
<d>85.800003</d>
<d>85.849998</d>
<d>85.900002</d>
<d>85.949997</d>
<d>86</d>
<d>86.050003</d>
<d>86.099998</d>
<d>86.150002</d>
<d>86.199997</d>
<d>86.25</d>
<d>86.300003</d>
<d>86.349998</d>
<d>86.400002</d>
<d>86.449997</d>
<d>86.5</d>
<d>86.550003</d>
<d>86.599998</d>
<d>86.650002</d>
<d>86.699997</d>
<d>86.75</d>
<d>86.800003</d>
<d>86.849998</d>
<d>86.900002</d>
<d>86.949997</d>
<d>87</d>
<d>87.050003</d>
<d>87.099998</d>
<d>87.150002</d>
<d>87.199997</d>
<d>87.25</d>
<d>87.300003</d>
<d>87.349998</d>
<d>87.400002</d>
<d>87.449997</d>
<d>87.5</d>
<d>87.550003</d>
<d>87.599998</d>
<d>87.650002</d>
<d>87.699997</d>
<d>87.75</d>
<d>87.800003</d>
<d>87.849998</d>
<d>87.900002</d>
<d>87.949997</d>
<d>88</d>
<d>88.050003</d>
<d>88.099998</d>
<d>88.150002</d>
<d>88.199997</d>
<d>88.25</d>
<d>88.300003</d>
<d>88.349998</d>
<d>88.400002</d>
<d>88.449997</d>
<d>88.5</d>
<d>88.550003</d>
<d>88.599998</d>
<d>88.650002</d>
<d>88.699997</d>
<d>88.75</d>
<d>88.800003</d>
<d>88.849998</d>
<d>88.900002</d>
<d>88.949997</d>
<d>89</d>
<d>89.050003</d>
<d>89.099998</d>
<d>89.150002</d>
<d>89.199997</d>
<d>89.25</d>
<d>89.300003</d>
<d>89.349998</d>
<d>89.400002</d>
<d>89.449997</d>
<d>89.5</d>
<d>89.550003</d>
<d>89.599998</d>
<d>89.650002</d>
<d>89.699997</d>
<d>89.75</d>
<d>89.800003</d>
<d>89.849998</d>
<d>89.900002</d>
<d>89.949997</d>
<d>90</d>
<d>90.050003</d>
<d>90.099998</d>
<d>90.150002</d>
<d>90.199997</d>
<d>90.25</d>
<d>90.300003</d>
<d>90.349998</d>
<d>90.400002</d>
<d>90.449997</d>
<d>90.5</d>
<d>90.550003</d>
<d>90.599998</d>
<d>90.650002</d>
<d>90.699997</d>
<d>90.75</d>
<d>90.800003</d>
<d>90.849998</d>
<d>90.900002</d>
<d>90.949997</d>
<d>91</d>
<d>91.050003</d>
<d>91.099998</d>
<d>91.150002</d>
<d>91.199997</d>
<d>91.25</d>
<d>91.300003</d>
<d>91.349998</d>
<d>91.400002</d>
<d>91.449997</d>
<d>91.5</d>
<d>91.550003</d>
<d>91.599998</d>
<d>91.650002</d>
<d>91.699997</d>
<d>91.75</d>
<d>91.800003</d>
<d>91.849998</d>
<d>91.900002</d>
<d>91.949997</d>
<d>92</d>
<d>92.050003</d>
<d>92.099998</d>
<d>92.150002</d>
<d>92.199997</d>
<d>92.25</d>
<d>92.300003</d>
<d>92.349998</d>
<d>92.400002</d>
<d>92.449997</d>
<d>92.5</d>
<d>92.550003</d>
<d>92.599998</d>
<d>92.650002</d>
<d>92.699997</d>
<d>92.75</d>
<d>92.800003</d>
<d>92.849998</d>
<d>92.900002</d>
<d>92.949997</d>
<d>93</d>
<d>93.050003</d>
<d>93.099998</d>
<d>93.150002</d>
<d>93.199997</d>
<d>93.25</d>
<d>93.300003</d>
<d>93.349998</d>
<d>93.400002</d>
<d>93.449997</d>
<d>93.5</d>
<d>93.550003</d>
<d>93.599998</d>
<d>93.650002</d>
<d>93.699997</d>
<d>93.75</d>
<d>93.800003</d>
<d>93.849998</d>
<d>93.900002</d>
<d>93.949997</d>
<d>94</d>
<d>94.050003</d>
<d>94.099998</d>
<d>94.150002</d>
<d>94.199997</d>
<d>94.25</d>
<d>94.300003</d>
<d>94.349998</d>
<d>94.400002</d>
<d>94.449997</d>
<d>94.5</d>
<d>94.550003</d>
<d>94.599998</d>
<d>94.650002</d>
<d>94.699997</d>
<d>94.75</d>
<d>94.800003</d>
<d>94.849998</d>
<d>94.900002</d>
<d>94.949997</d>
<d>95</d>
<d>95.050003</d>
<d>95.099998</d>
<d>95.150002</d>
<d>95.199997</d>
<d>95.25</d>
<d>95.300003</d>
<d>95.349998</d>
<d>95.400002</d>
<d>95.449997</d>
<d>95.5</d>
<d>95.550003</d>
<d>95.599998</d>
<d>95.650002</d>
<d>95.699997</d>
<d>95.75</d>
<d>95.800003</d>
<d>95.849998</d>
<d>95.900002</d>
<d>95.949997</d>
<d>96</d>
<d>96.050003</d>
<d>96.099998</d>
<d>96.150002</d>
<d>96.199997</d>
<d>96.25</d>
<d>96.300003</d>
<d>96.349998</d>
<d>96.400002</d>
<d>96.449997</d>
<d>96.5</d>
<d>96.550003</d>
<d>96.599998</d>
<d>96.650002</d>
<d>96.699997</d>
<d>96.75</d>
<d>96.800003</d>
<d>96.849998</d>
<d>96.900002</d>
<d>96.949997</d>
<d>97</d>
<d>97.050003</d>
<d>97.099998</d>
<d>97.150002</d>
<d>97.199997</d>
<d>97.25</d>
<d>97.300003</d>
<d>97.349998</d>
<d>97.400002</d>
<d>97.449997</d>
<d>97.5</d>
<d>97.550003</d>
<d>97.599998</d>
<d>97.650002</d>
<d>97.699997</d>
<d>97.75</d>
<d>97.800003</d>
<d>97.849998</d>
<d>97.900002</d>
<d>97.949997</d>
<d>98</d>
<d>98.050003</d>
<d>98.099998</d>
<d>98.150002</d>
<d>98.199997</d>
<d>98.25</d>
<d>98.300003</d>
<d>98.349998</d>
<d>98.400002</d>
<d>98.449997</d>
<d>98.5</d>
<d>98.550003</d>
<d>98.599998</d>
<d>98.650002</d>
<d>98.699997</d>
<d>98.75</d>
<d>98.800003</d>
<d>98.849998</d>
<d>98.900002</d>
<d>98.949997</d>
<d>99</d>
<d>99.050003</d>
<d>99.099998</d>
<d>99.150002</d>
<d>99.199997</d>
<d>99.25</d>
<d>99.300003</d>
<d>99.349998</d>
<d>99.400002</d>
<d>99.449997</d>
<d>99.5</d>
<d>99.550003</d>
<d>99.599998</d>
<d>99.650002</d>
<d>99.699997</d>
<d>99.75</d>
<d>99.800003</d>
<d>99.849998</d>
<d>99.900002</d>
<d>99.949997</d>
<d>50</d>
<d>50.025</d>
<d>50.05</d>
<d>50.075</d>
<d>50.1</d>
<d>50.125</d>
<d>50.15</d>
<d>50.175</d>
<d>50.2</d>
<d>50.225</d>
<d>50.25</d>
<d>50.275</d>
<d>50.3</d>
<d>50.325</d>
<d>50.35</d>
<d>50.375</d>
<d>50.4</d>
<d>50.425</d>
<d>50.45</d>
<d>50.475</d>
<d>50.5</d>
<d>50.525</d>
<d>50.55</d>
<d>50.575</d>
<d>50.6</d>
<d>50.625</d>
<d>50.65</d>
<d>50.675</d>
<d>50.7</d>
<d>50.725</d>
<d>50.75</d>
<d>50.775</d>
<d>50.8</d>
<d>50.825</d>
<d>50.85</d>
<d>50.875</d>
<d>50.9</d>
<d>50.925</d>
<d>50.95</d>
<d>50.975</d>
<d>51</d>
<d>51.025</d>
<d>51.05</d>
<d>51.075</d>
<d>51.1</d>
<d>51.125</d>
<d>51.15</d>
<d>51.175</d>
<d>51.2</d>
<d>51.225</d>
<d>51.25</d>
<d>51.275</d>
<d>51.3</d>
<d>51.325</d>
<d>51.35</d>
<d>51.375</d>
<d>51.4</d>
<d>51.425</d>
<d>51.45</d>
<d>51.475</d>
<d>51.5</d>
<d>51.525</d>
<d>51.55</d>
<d>51.575</d>
<d>51.6</d>
<d>51.625</d>
<d>51.65</d>
<d>51.675</d>
<d>51.7</d>
<d>51.725</d>
<d>51.75</d>
<d>51.775</d>
<d>51.8</d>
<d>51.825</d>
<d>51.85</d>
<d>51.875</d>
<d>51.9</d>
<d>51.925</d>
<d>51.95</d>
<d>51.975</d>
<d>52</d>
<d>52.025</d>
<d>52.05</d>
<d>52.075</d>
<d>52.1</d>
<d>52.125</d>
<d>52.15</d>
<d>52.175</d>
<d>52.2</d>
<d>52.225</d>
<d>52.25</d>
<d>52.275</d>
<d>52.3</d>
<d>52.325</d>
<d>52.35</d>
<d>52.375</d>
<d>52.4</d>
<d>52.425</d>
<d>52.45</d>
<d>52.475</d>
<d>52.5</d>
<d>52.525</d>
<d>52.55</d>
<d>52.575</d>
<d>52.6</d>
<d>52.625</d>
<d>52.65</d>
<d>52.675</d>
<d>52.7</d>
<d>52.725</d>
<d>52.75</d>
<d>52.775</d>
<d>52.8</d>
<d>52.825</d>
<d>52.85</d>
<d>52.875</d>
<d>52.9</d>
<d>52.925</d>
<d>52.95</d>
<d>52.975</d>
<d>53</d>
<d>53.025</d>
<d>53.05</d>
<d>53.075</d>
<d>53.1</d>
<d>53.125</d>
<d>53.15</d>
<d>53.175</d>
<d>53.2</d>
<d>53.225</d>
<d>53.25</d>
<d>53.275</d>
<d>53.3</d>
<d>53.325</d>
<d>53.35</d>
<d>53.375</d>
<d>53.4</d>
<d>53.425</d>
<d>53.45</d>
<d>53.475</d>
<d>53.5</d>
<d>53.525</d>
<d>53.55</d>
<d>53.575</d>
<d>53.6</d>
<d>53.625</d>
<d>53.65</d>
<d>53.675</d>
<d>53.7</d>
<d>53.725</d>
<d>53.75</d>
<d>53.775</d>
<d>53.8</d>
<d>53.825</d>
<d>53.85</d>
<d>53.875</d>
<d>53.9</d>
<d>53.925</d>
<d>53.95</d>
<d>53.975</d>
<d>54</d>
<d>54.025</d>
<d>54.05</d>
<d>54.075</d>
<d>54.1</d>
<d>54.125</d>
<d>54.15</d>
<d>54.175</d>
<d>54.2</d>
<d>54.225</d>
<d>54.25</d>
<d>54.275</d>
<d>54.3</d>
<d>54.325</d>
<d>54.35</d>
<d>54.375</d>
<d>54.4</d>
<d>54.425</d>
<d>54.45</d>
<d>54.475</d>
<d>54.5</d>
<d>54.525</d>
<d>54.55</d>
<d>54.575</d>
<d>54.6</d>
<d>54.625</d>
<d>54.65</d>
<d>54.675</d>
<d>54.7</d>
<d>54.725</d>
<d>54.75</d>
<d>54.775</d>
<d>54.8</d>
<d>54.825</d>
<d>54.85</d>
<d>54.875</d>
<d>54.9</d>
<d>54.925</d>
<d>54.95</d>
<d>54.975</d>
<d>55</d>
<d>55.025</d>
<d>55.05</d>
<d>55.075</d>
<d>55.1</d>
<d>55.125</d>
<d>55.15</d>
<d>55.175</d>
<d>55.2</d>
<d>55.225</d>
<d>55.25</d>
<d>55.275</d>
<d>55.3</d>
<d>55.325</d>
<d>55.35</d>
<d>55.375</d>
<d>55.4</d>
<d>55.425</d>
<d>55.45</d>
<d>55.475</d>
<d>55.5</d>
<d>55.525</d>
<d>55.55</d>
<d>55.575</d>
<d>55.6</d>
<d>55.625</d>
<d>55.65</d>
<d>55.675</d>
<d>55.7</d>
<d>55.725</d>
<d>55.75</d>
<d>55.775</d>
<d>55.8</d>
<d>55.825</d>
<d>55.85</d>
<d>55.875</d>
<d>55.9</d>
<d>55.925</d>
<d>55.95</d>
<d>55.975</d>
<d>56</d>
<d>56.025</d>
<d>56.05</d>
<d>56.075</d>
<d>56.1</d>
<d>56.125</d>
<d>56.15</d>
<d>56.175</d>
<d>56.2</d>
<d>56.225</d>
<d>56.25</d>
<d>56.275</d>
<d>56.3</d>
<d>56.325</d>
<d>56.35</d>
<d>56.375</d>
<d>56.4</d>
<d>56.425</d>
<d>56.45</d>
<d>56.475</d>
<d>56.5</d>
<d>56.525</d>
<d>56.55</d>
<d>56.575</d>
<d>56.6</d>
<d>56.625</d>
<d>56.65</d>
<d>56.675</d>
<d>56.7</d>
<d>56.725</d>
<d>56.75</d>
<d>56.775</d>
<d>56.8</d>
<d>56.825</d>
<d>56.85</d>
<d>56.875</d>
<d>56.9</d>
<d>56.925</d>
<d>56.95</d>
<d>56.975</d>
<d>57</d>
<d>57.025</d>
<d>57.05</d>
<d>57.075</d>
<d>57.1</d>
<d>57.125</d>
<d>57.15</d>
<d>57.175</d>
<d>57.2</d>
<d>57.225</d>
<d>57.25</d>
<d>57.275</d>
<d>57.3</d>
<d>57.325</d>
<d>57.35</d>
<d>57.375</d>
<d>57.4</d>
<d>57.425</d>
<d>57.45</d>
<d>57.475</d>
<d>57.5</d>
<d>57.525</d>
<d>57.55</d>
<d>57.575</d>
<d>57.6</d>
<d>57.625</d>
<d>57.65</d>
<d>57.675</d>
<d>57.7</d>
<d>57.725</d>
<d>57.75</d>
<d>57.775</d>
<d>57.8</d>
<d>57.825</d>
<d>57.85</d>
<d>57.875</d>
<d>57.9</d>
<d>57.925</d>
<d>57.95</d>
<d>57.975</d>
<d>58</d>
<d>58.025</d>
<d>58.05</d>
<d>58.075</d>
<d>58.1</d>
<d>58.125</d>
<d>58.15</d>
<d>58.175</d>
<d>58.2</d>
<d>58.225</d>
<d>58.25</d>
<d>58.275</d>
<d>58.3</d>
<d>58.325</d>
<d>58.35</d>
<d>58.375</d>
<d>58.4</d>
<d>58.425</d>
<d>58.45</d>
<d>58.475</d>
<d>58.5</d>
<d>58.525</d>
<d>58.55</d>
<d>58.575</d>
<d>58.6</d>
<d>58.625</d>
<d>58.65</d>
<d>58.675</d>
<d>58.7</d>
<d>58.725</d>
<d>58.75</d>
<d>58.775</d>
<d>58.8</d>
<d>58.825</d>
<d>58.85</d>
<d>58.875</d>
<d>58.9</d>
<d>58.925</d>
<d>58.95</d>
<d>58.975</d>
<d>59</d>
<d>59.025</d>
<d>59.05</d>
<d>59.075</d>
<d>59.1</d>
<d>59.125</d>
<d>59.15</d>
<d>59.175</d>
<d>59.2</d>
<d>59.225</d>
<d>59.25</d>
<d>59.275</d>
<d>59.3</d>
<d>59.325</d>
<d>59.35</d>
<d>59.375</d>
<d>59.4</d>
<d>59.425</d>
<d>59.45</d>
<d>59.475</d>
<d>59.5</d>
<d>59.525</d>
<d>59.55</d>
<d>59.575</d>
<d>59.6</d>
<d>59.625</d>
<d>59.65</d>
<d>59.675</d>
<d>59.7</d>
<d>59.725</d>
<d>59.75</d>
<d>59.775</d>
<d>59.8</d>
<d>59.825</d>
<d>59.85</d>
<d>59.875</d>
<d>59.9</d>
<d>59.925</d>
<d>59.95</d>
<d>59.975</d>
<d>60</d>
<d>60.025</d>
<d>60.05</d>
<d>60.075</d>
<d>60.1</d>
<d>60.125</d>
<d>60.15</d>
<d>60.175</d>
<d>60.2</d>
<d>60.225</d>
<d>60.25</d>
<d>60.275</d>
<d>60.3</d>
<d>60.325</d>
<d>60.35</d>
<d>60.375</d>
<d>60.4</d>
<d>60.425</d>
<d>60.45</d>
<d>60.475</d>
<d>60.5</d>
<d>60.525</d>
<d>60.55</d>
<d>60.575</d>
<d>60.6</d>
<d>60.625</d>
<d>60.65</d>
<d>60.675</d>
<d>60.7</d>
<d>60.725</d>
<d>60.75</d>
<d>60.775</d>
<d>60.8</d>
<d>60.825</d>
<d>60.85</d>
<d>60.875</d>
<d>60.9</d>
<d>60.925</d>
<d>60.95</d>
<d>60.975</d>
<d>61</d>
<d>61.025</d>
<d>61.05</d>
<d>61.075</d>
<d>61.1</d>
<d>61.125</d>
<d>61.15</d>
<d>61.175</d>
<d>61.2</d>
<d>61.225</d>
<d>61.25</d>
<d>61.275</d>
<d>61.3</d>
<d>61.325</d>
<d>61.35</d>
<d>61.375</d>
<d>61.4</d>
<d>61.425</d>
<d>61.45</d>
<d>61.475</d>
<d>61.5</d>
<d>61.525</d>
<d>61.55</d>
<d>61.575</d>
<d>61.6</d>
<d>61.625</d>
<d>61.65</d>
<d>61.675</d>
<d>61.7</d>
<d>61.725</d>
<d>61.75</d>
<d>61.775</d>
<d>61.8</d>
<d>61.825</d>
<d>61.85</d>
<d>61.875</d>
<d>61.9</d>
<d>61.925</d>
<d>61.95</d>
<d>61.975</d>
<d>62</d>
<d>62.025</d>
<d>62.05</d>
<d>62.075</d>
<d>62.1</d>
<d>62.125</d>
<d>62.15</d>
<d>62.175</d>
<d>62.2</d>
<d>62.225</d>
<d>62.25</d>
<d>62.275</d>
<d>62.3</d>
<d>62.325</d>
<d>62.35</d>
<d>62.375</d>
<d>62.4</d>
<d>62.425</d>
<d>62.45</d>
<d>62.475</d>
<d>62.5</d>
<d>62.525</d>
<d>62.55</d>
<d>62.575</d>
<d>62.6</d>
<d>62.625</d>
<d>62.65</d>
<d>62.675</d>
<d>62.7</d>
<d>62.725</d>
<d>62.75</d>
<d>62.775</d>
<d>62.8</d>
<d>62.825</d>
<d>62.85</d>
<d>62.875</d>
<d>62.9</d>
<d>62.925</d>
<d>62.95</d>
<d>62.975</d>
<d>63</d>
<d>63.025</d>
<d>63.05</d>
<d>63.075</d>
<d>63.1</d>
<d>63.125</d>
<d>63.15</d>
<d>63.175</d>
<d>63.2</d>
<d>63.225</d>
<d>63.25</d>
<d>63.275</d>
<d>63.3</d>
<d>63.325</d>
<d>63.35</d>
<d>63.375</d>
<d>63.4</d>
<d>63.425</d>
<d>63.45</d>
<d>63.475</d>
<d>63.5</d>
<d>63.525</d>
<d>63.55</d>
<d>63.575</d>
<d>63.6</d>
<d>63.625</d>
<d>63.65</d>
<d>63.675</d>
<d>63.7</d>
<d>63.725</d>
<d>63.75</d>
<d>63.775</d>
<d>63.8</d>
<d>63.825</d>
<d>63.85</d>
<d>63.875</d>
<d>63.9</d>
<d>63.925</d>
<d>63.95</d>
<d>63.975</d>
<d>64</d>
<d>64.025</d>
<d>64.05</d>
<d>64.075</d>
<d>64.1</d>
<d>64.125</d>
<d>64.15</d>
<d>64.175</d>
<d>64.2</d>
<d>64.225</d>
<d>64.25</d>
<d>64.275</d>
<d>64.3</d>
<d>64.325</d>
<d>64.35</d>
<d>64.375</d>
<d>64.4</d>
<d>64.425</d>
<d>64.45</d>
<d>64.475</d>
<d>64.5</d>
<d>64.525</d>
<d>64.55</d>
<d>64.575</d>
<d>64.6</d>
<d>64.625</d>
<d>64.65</d>
<d>64.675</d>
<d>64.7</d>
<d>64.725</d>
<d>64.75</d>
<d>64.775</d>
<d>64.8</d>
<d>64.825</d>
<d>64.85</d>
<d>64.875</d>
<d>64.9</d>
<d>64.925</d>
<d>64.95</d>
<d>64.975</d>
<d>65</d>
<d>65.025</d>
<d>65.05</d>
<d>65.075</d>
<d>65.1</d>
<d>65.125</d>
<d>65.15</d>
<d>65.175</d>
<d>65.2</d>
<d>65.225</d>
<d>65.25</d>
<d>65.275</d>
<d>65.3</d>
<d>65.325</d>
<d>65.35</d>
<d>65.375</d>
<d>65.4</d>
<d>65.425</d>
<d>65.45</d>
<d>65.475</d>
<d>65.5</d>
<d>65.525</d>
<d>65.55</d>
<d>65.575</d>
<d>65.6</d>
<d>65.625</d>
<d>65.65</d>
<d>65.675</d>
<d>65.7</d>
<d>65.725</d>
<d>65.75</d>
<d>65.775</d>
<d>65.8</d>
<d>65.825</d>
<d>65.85</d>
<d>65.875</d>
<d>65.9</d>
<d>65.925</d>
<d>65.95</d>
<d>65.975</d>
<d>66</d>
<d>66.025</d>
<d>66.05</d>
<d>66.075</d>
<d>66.1</d>
<d>66.125</d>
<d>66.15</d>
<d>66.175</d>
<d>66.2</d>
<d>66.225</d>
<d>66.25</d>
<d>66.275</d>
<d>66.3</d>
<d>66.325</d>
<d>66.35</d>
<d>66.375</d>
<d>66.4</d>
<d>66.425</d>
<d>66.45</d>
<d>66.475</d>
<d>66.5</d>
<d>66.525</d>
<d>66.55</d>
<d>66.575</d>
<d>66.6</d>
<d>66.625</d>
<d>66.65</d>
<d>66.675</d>
<d>66.7</d>
<d>66.725</d>
<d>66.75</d>
<d>66.775</d>
<d>66.8</d>
<d>66.825</d>
<d>66.85</d>
<d>66.875</d>
<d>66.9</d>
<d>66.925</d>
<d>66.95</d>
<d>66.975</d>
<d>67</d>
<d>67.025</d>
<d>67.05</d>
<d>67.075</d>
<d>67.1</d>
<d>67.125</d>
<d>67.15</d>
<d>67.175</d>
<d>67.2</d>
<d>67.225</d>
<d>67.25</d>
<d>67.275</d>
<d>67.3</d>
<d>67.325</d>
<d>67.35</d>
<d>67.375</d>
<d>67.4</d>
<d>67.425</d>
<d>67.45</d>
<d>67.475</d>
<d>67.5</d>
<d>67.525</d>
<d>67.55</d>
<d>67.575</d>
<d>67.6</d>
<d>67.625</d>
<d>67.65</d>
<d>67.675</d>
<d>67.7</d>
<d>67.725</d>
<d>67.75</d>
<d>67.775</d>
<d>67.8</d>
<d>67.825</d>
<d>67.85</d>
<d>67.875</d>
<d>67.9</d>
<d>67.925</d>
<d>67.95</d>
<d>67.975</d>
<d>68</d>
<d>68.025</d>
<d>68.05</d>
<d>68.075</d>
<d>68.1</d>
<d>68.125</d>
<d>68.15</d>
<d>68.175</d>
<d>68.2</d>
<d>68.225</d>
<d>68.25</d>
<d>68.275</d>
<d>68.3</d>
<d>68.325</d>
<d>68.35</d>
<d>68.375</d>
<d>68.4</d>
<d>68.425</d>
<d>68.45</d>
<d>68.475</d>
<d>68.5</d>
<d>68.525</d>
<d>68.55</d>
<d>68.575</d>
<d>68.6</d>
<d>68.625</d>
<d>68.65</d>
<d>68.675</d>
<d>68.7</d>
<d>68.725</d>
<d>68.75</d>
<d>68.775</d>
<d>68.8</d>
<d>68.825</d>
<d>68.85</d>
<d>68.875</d>
<d>68.9</d>
<d>68.925</d>
<d>68.95</d>
<d>68.975</d>
<d>69</d>
<d>69.025</d>
<d>69.05</d>
<d>69.075</d>
<d>69.1</d>
<d>69.125</d>
<d>69.15</d>
<d>69.175</d>
<d>69.2</d>
<d>69.225</d>
<d>69.25</d>
<d>69.275</d>
<d>69.3</d>
<d>69.325</d>
<d>69.35</d>
<d>69.375</d>
<d>69.4</d>
<d>69.425</d>
<d>69.45</d>
<d>69.475</d>
<d>69.5</d>
<d>69.525</d>
<d>69.55</d>
<d>69.575</d>
<d>69.6</d>
<d>69.625</d>
<d>69.65</d>
<d>69.675</d>
<d>69.7</d>
<d>69.725</d>
<d>69.75</d>
<d>69.775</d>
<d>69.8</d>
<d>69.825</d>
<d>69.85</d>
<d>69.875</d>
<d>69.9</d>
<d>69.925</d>
<d>69.95</d>
<d>69.975</d>
<d>70</d>
<d>70.025</d>
<d>70.05</d>
<d>70.075</d>
<d>70.1</d>
<d>70.125</d>
<d>70.15</d>
<d>70.175</d>
<d>70.2</d>
<d>70.225</d>
<d>70.25</d>
<d>70.275</d>
<d>70.3</d>
<d>70.325</d>
<d>70.35</d>
<d>70.375</d>
<d>70.4</d>
<d>70.425</d>
<d>70.45</d>
<d>70.475</d>
<d>70.5</d>
<d>70.525</d>
<d>70.55</d>
<d>70.575</d>
<d>70.6</d>
<d>70.625</d>
<d>70.65</d>
<d>70.675</d>
<d>70.7</d>
<d>70.725</d>
<d>70.75</d>
<d>70.775</d>
<d>70.8</d>
<d>70.825</d>
<d>70.85</d>
<d>70.875</d>
<d>70.9</d>
<d>70.925</d>
<d>70.95</d>
<d>70.975</d>
<d>71</d>
<d>71.025</d>
<d>71.05</d>
<d>71.075</d>
<d>71.1</d>
<d>71.125</d>
<d>71.15</d>
<d>71.175</d>
<d>71.2</d>
<d>71.225</d>
<d>71.25</d>
<d>71.275</d>
<d>71.3</d>
<d>71.325</d>
<d>71.35</d>
<d>71.375</d>
<d>71.4</d>
<d>71.425</d>
<d>71.45</d>
<d>71.475</d>
<d>71.5</d>
<d>71.525</d>
<d>71.55</d>
<d>71.575</d>
<d>71.6</d>
<d>71.625</d>
<d>71.65</d>
<d>71.675</d>
<d>71.7</d>
<d>71.725</d>
<d>71.75</d>
<d>71.775</d>
<d>71.8</d>
<d>71.825</d>
<d>71.85</d>
<d>71.875</d>
<d>71.9</d>
<d>71.925</d>
<d>71.95</d>
<d>71.975</d>
<d>72</d>
<d>72.025</d>
<d>72.05</d>
<d>72.075</d>
<d>72.1</d>
<d>72.125</d>
<d>72.15</d>
<d>72.175</d>
<d>72.2</d>
<d>72.225</d>
<d>72.25</d>
<d>72.275</d>
<d>72.3</d>
<d>72.325</d>
<d>72.35</d>
<d>72.375</d>
<d>72.4</d>
<d>72.425</d>
<d>72.45</d>
<d>72.475</d>
<d>72.5</d>
<d>72.525</d>
<d>72.55</d>
<d>72.575</d>
<d>72.6</d>
<d>72.625</d>
<d>72.65</d>
<d>72.675</d>
<d>72.7</d>
<d>72.725</d>
<d>72.75</d>
<d>72.775</d>
<d>72.8</d>
<d>72.825</d>
<d>72.85</d>
<d>72.875</d>
<d>72.9</d>
<d>72.925</d>
<d>72.95</d>
<d>72.975</d>
<d>73</d>
<d>73.025</d>
<d>73.05</d>
<d>73.075</d>
<d>73.1</d>
<d>73.125</d>
<d>73.15</d>
<d>73.175</d>
<d>73.2</d>
<d>73.225</d>
<d>73.25</d>
<d>73.275</d>
<d>73.3</d>
<d>73.325</d>
<d>73.35</d>
<d>73.375</d>
<d>73.4</d>
<d>73.425</d>
<d>73.45</d>
<d>73.475</d>
<d>73.5</d>
<d>73.525</d>
<d>73.55</d>
<d>73.575</d>
<d>73.6</d>
<d>73.625</d>
<d>73.65</d>
<d>73.675</d>
<d>73.7</d>
<d>73.725</d>
<d>73.75</d>
<d>73.775</d>
<d>73.8</d>
<d>73.825</d>
<d>73.85</d>
<d>73.875</d>
<d>73.9</d>
<d>73.925</d>
<d>73.95</d>
<d>73.975</d>
<d>74</d>
<d>74.025</d>
<d>74.05</d>
<d>74.075</d>
<d>74.1</d>
<d>74.125</d>
<d>74.15</d>
<d>74.175</d>
<d>74.2</d>
<d>74.225</d>
<d>74.25</d>
<d>74.275</d>
<d>74.3</d>
<d>74.325</d>
<d>74.35</d>
<d>74.375</d>
<d>74.4</d>
<d>74.425</d>
<d>74.45</d>
<d>74.475</d>
<d>74.5</d>
<d>74.525</d>
<d>74.55</d>
<d>74.575</d>
<d>74.6</d>
<d>74.625</d>
<d>74.65</d>
<d>74.675</d>
<d>74.7</d>
<d>74.725</d>
<d>74.75</d>
<d>74.775</d>
<d>74.8</d>
<d>74.825</d>
<d>74.85</d>
<d>74.875</d>
<d>74.9</d>
<d>74.925</d>
<d>74.95</d>
<d>74.975</d>
<d>75</d>
<d>75.025</d>
<d>75.05</d>
<d>75.075</d>
<d>75.1</d>
<d>75.125</d>
<d>75.15</d>
<d>75.175</d>
<d>75.2</d>
<d>75.225</d>
<d>75.25</d>
<d>75.275</d>
<d>75.3</d>
<d>75.325</d>
<d>75.35</d>
<d>75.375</d>
<d>75.4</d>
<d>75.425</d>
<d>75.45</d>
<d>75.475</d>
<d>75.5</d>
<d>75.525</d>
<d>75.55</d>
<d>75.575</d>
<d>75.6</d>
<d>75.625</d>
<d>75.65</d>
<d>75.675</d>
<d>75.7</d>
<d>75.725</d>
<d>75.75</d>
<d>75.775</d>
<d>75.8</d>
<d>75.825</d>
<d>75.85</d>
<d>75.875</d>
<d>75.9</d>
<d>75.925</d>
<d>75.95</d>
<d>75.975</d>
<d>76</d>
<d>76.025</d>
<d>76.05</d>
<d>76.075</d>
<d>76.1</d>
<d>76.125</d>
<d>76.15</d>
<d>76.175</d>
<d>76.2</d>
<d>76.225</d>
<d>76.25</d>
<d>76.275</d>
<d>76.3</d>
<d>76.325</d>
<d>76.35</d>
<d>76.375</d>
<d>76.4</d>
<d>76.425</d>
<d>76.45</d>
<d>76.475</d>
<d>76.5</d>
<d>76.525</d>
<d>76.55</d>
<d>76.575</d>
<d>76.6</d>
<d>76.625</d>
<d>76.65</d>
<d>76.675</d>
<d>76.7</d>
<d>76.725</d>
<d>76.75</d>
<d>76.775</d>
<d>76.8</d>
<d>76.825</d>
<d>76.85</d>
<d>76.875</d>
<d>76.9</d>
<d>76.925</d>
<d>76.95</d>
<d>76.975</d>
<d>77</d>
<d>77.025</d>
<d>77.05</d>
<d>77.075</d>
<d>77.1</d>
<d>77.125</d>
<d>77.15</d>
<d>77.175</d>
<d>77.2</d>
<d>77.225</d>
<d>77.25</d>
<d>77.275</d>
<d>77.3</d>
<d>77.325</d>
<d>77.35</d>
<d>77.375</d>
<d>77.4</d>
<d>77.425</d>
<d>77.45</d>
<d>77.475</d>
<d>77.5</d>
<d>77.525</d>
<d>77.55</d>
<d>77.575</d>
<d>77.6</d>
<d>77.625</d>
<d>77.65</d>
<d>77.675</d>
<d>77.7</d>
<d>77.725</d>
<d>77.75</d>
<d>77.775</d>
<d>77.8</d>
<d>77.825</d>
<d>77.85</d>
<d>77.875</d>
<d>77.9</d>
<d>77.925</d>
<d>77.95</d>
<d>77.975</d>
<d>78</d>
<d>78.025</d>
<d>78.05</d>
<d>78.075</d>
<d>78.1</d>
<d>78.125</d>
<d>78.15</d>
<d>78.175</d>
<d>78.2</d>
<d>78.225</d>
<d>78.25</d>
<d>78.275</d>
<d>78.3</d>
<d>78.325</d>
<d>78.35</d>
<d>78.375</d>
<d>78.4</d>
<d>78.425</d>
<d>78.45</d>
<d>78.475</d>
<d>78.5</d>
<d>78.525</d>
<d>78.55</d>
<d>78.575</d>
<d>78.6</d>
<d>78.625</d>
<d>78.65</d>
<d>78.675</d>
<d>78.7</d>
<d>78.725</d>
<d>78.75</d>
<d>78.775</d>
<d>78.8</d>
<d>78.825</d>
<d>78.85</d>
<d>78.875</d>
<d>78.9</d>
<d>78.925</d>
<d>78.95</d>
<d>78.975</d>
<d>79</d>
<d>79.025</d>
<d>79.05</d>
<d>79.075</d>
<d>79.1</d>
<d>79.125</d>
<d>79.15</d>
<d>79.175</d>
<d>79.2</d>
<d>79.225</d>
<d>79.25</d>
<d>79.275</d>
<d>79.3</d>
<d>79.325</d>
<d>79.35</d>
<d>79.375</d>
<d>79.4</d>
<d>79.425</d>
<d>79.45</d>
<d>79.475</d>
<d>79.5</d>
<d>79.525</d>
<d>79.55</d>
<d>79.575</d>
<d>79.6</d>
<d>79.625</d>
<d>79.65</d>
<d>79.675</d>
<d>79.7</d>
<d>79.725</d>
<d>79.75</d>
<d>79.775</d>
<d>79.8</d>
<d>79.825</d>
<d>79.85</d>
<d>79.875</d>
<d>79.9</d>
<d>79.925</d>
<d>79.95</d>
<d>79.975</d>
<d>80</d>
<d>80.025</d>
<d>80.05</d>
<d>80.075</d>
<d>80.1</d>
<d>80.125</d>
<d>80.15</d>
<d>80.175</d>
<d>80.2</d>
<d>80.225</d>
<d>80.25</d>
<d>80.275</d>
<d>80.3</d>
<d>80.325</d>
<d>80.35</d>
<d>80.375</d>
<d>80.4</d>
<d>80.425</d>
<d>80.45</d>
<d>80.475</d>
<d>80.5</d>
<d>80.525</d>
<d>80.55</d>
<d>80.575</d>
<d>80.6</d>
<d>80.625</d>
<d>80.65</d>
<d>80.675</d>
<d>80.7</d>
<d>80.725</d>
<d>80.75</d>
<d>80.775</d>
<d>80.8</d>
<d>80.825</d>
<d>80.85</d>
<d>80.875</d>
<d>80.9</d>
<d>80.925</d>
<d>80.95</d>
<d>80.975</d>
<d>81</d>
<d>81.025</d>
<d>81.05</d>
<d>81.075</d>
<d>81.1</d>
<d>81.125</d>
<d>81.15</d>
<d>81.175</d>
<d>81.2</d>
<d>81.225</d>
<d>81.25</d>
<d>81.275</d>
<d>81.3</d>
<d>81.325</d>
<d>81.35</d>
<d>81.375</d>
<d>81.4</d>
<d>81.425</d>
<d>81.45</d>
<d>81.475</d>
<d>81.5</d>
<d>81.525</d>
<d>81.55</d>
<d>81.575</d>
<d>81.6</d>
<d>81.625</d>
<d>81.65</d>
<d>81.675</d>
<d>81.7</d>
<d>81.725</d>
<d>81.75</d>
<d>81.775</d>
<d>81.8</d>
<d>81.825</d>
<d>81.85</d>
<d>81.875</d>
<d>81.9</d>
<d>81.925</d>
<d>81.95</d>
<d>81.975</d>
<d>82</d>
<d>82.025</d>
<d>82.05</d>
<d>82.075</d>
<d>82.1</d>
<d>82.125</d>
<d>82.15</d>
<d>82.175</d>
<d>82.2</d>
<d>82.225</d>
<d>82.25</d>
<d>82.275</d>
<d>82.3</d>
<d>82.325</d>
<d>82.35</d>
<d>82.375</d>
<d>82.4</d>
<d>82.425</d>
<d>82.45</d>
<d>82.475</d>
<d>82.5</d>
<d>82.525</d>
<d>82.55</d>
<d>82.575</d>
<d>82.6</d>
<d>82.625</d>
<d>82.65</d>
<d>82.675</d>
<d>82.7</d>
<d>82.725</d>
<d>82.75</d>
<d>82.775</d>
<d>82.8</d>
<d>82.825</d>
<d>82.85</d>
<d>82.875</d>
<d>82.9</d>
<d>82.925</d>
<d>82.95</d>
<d>82.975</d>
<d>83</d>
<d>83.025</d>
<d>83.05</d>
<d>83.075</d>
<d>83.1</d>
<d>83.125</d>
<d>83.15</d>
<d>83.175</d>
<d>83.2</d>
<d>83.225</d>
<d>83.25</d>
<d>83.275</d>
<d>83.3</d>
<d>83.325</d>
<d>83.35</d>
<d>83.375</d>
<d>83.4</d>
<d>83.425</d>
<d>83.45</d>
<d>83.475</d>
<d>83.5</d>
<d>83.525</d>
<d>83.55</d>
<d>83.575</d>
<d>83.6</d>
<d>83.625</d>
<d>83.65</d>
<d>83.675</d>
<d>83.7</d>
<d>83.725</d>
<d>83.75</d>
<d>83.775</d>
<d>83.8</d>
<d>83.825</d>
<d>83.85</d>
<d>83.875</d>
<d>83.9</d>
<d>83.925</d>
<d>83.95</d>
<d>83.975</d>
<d>84</d>
<d>84.025</d>
<d>84.05</d>
<d>84.075</d>
<d>84.1</d>
<d>84.125</d>
<d>84.15</d>
<d>84.175</d>
<d>84.2</d>
<d>84.225</d>
<d>84.25</d>
<d>84.275</d>
<d>84.3</d>
<d>84.325</d>
<d>84.35</d>
<d>84.375</d>
<d>84.4</d>
<d>84.425</d>
<d>84.45</d>
<d>84.475</d>
<d>84.5</d>
<d>84.525</d>
<d>84.55</d>
<d>84.575</d>
<d>84.6</d>
<d>84.625</d>
<d>84.65</d>
<d>84.675</d>
<d>84.7</d>
<d>84.725</d>
<d>84.75</d>
<d>84.775</d>
<d>84.8</d>
<d>84.825</d>
<d>84.85</d>
<d>84.875</d>
<d>84.9</d>
<d>84.925</d>
<d>84.95</d>
<d>84.975</d>
<d>85</d>
<d>85.025</d>
<d>85.05</d>
<d>85.075</d>
<d>85.1</d>
<d>85.125</d>
<d>85.15</d>
<d>85.175</d>
<d>85.2</d>
<d>85.225</d>
<d>85.25</d>
<d>85.275</d>
<d>85.3</d>
<d>85.325</d>
<d>85.35</d>
<d>85.375</d>
<d>85.4</d>
<d>85.425</d>
<d>85.45</d>
<d>85.475</d>
<d>85.5</d>
<d>85.525</d>
<d>85.55</d>
<d>85.575</d>
<d>85.6</d>
<d>85.625</d>
<d>85.65</d>
<d>85.675</d>
<d>85.7</d>
<d>85.725</d>
<d>85.75</d>
<d>85.775</d>
<d>85.8</d>
<d>85.825</d>
<d>85.85</d>
<d>85.875</d>
<d>85.9</d>
<d>85.925</d>
<d>85.95</d>
<d>85.975</d>
<d>86</d>
<d>86.025</d>
<d>86.05</d>
<d>86.075</d>
<d>86.1</d>
<d>86.125</d>
<d>86.15</d>
<d>86.175</d>
<d>86.2</d>
<d>86.225</d>
<d>86.25</d>
<d>86.275</d>
<d>86.3</d>
<d>86.325</d>
<d>86.35</d>
<d>86.375</d>
<d>86.4</d>
<d>86.425</d>
<d>86.45</d>
<d>86.475</d>
<d>86.5</d>
<d>86.525</d>
<d>86.55</d>
<d>86.575</d>
<d>86.6</d>
<d>86.625</d>
<d>86.65</d>
<d>86.675</d>
<d>86.7</d>
<d>86.725</d>
<d>86.75</d>
<d>86.775</d>
<d>86.8</d>
<d>86.825</d>
<d>86.85</d>
<d>86.875</d>
<d>86.9</d>
<d>86.925</d>
<d>86.95</d>
<d>86.975</d>
<d>87</d>
<d>87.025</d>
<d>87.05</d>
<d>87.075</d>
<d>87.1</d>
<d>87.125</d>
<d>87.15</d>
<d>87.175</d>
<d>87.2</d>
<d>87.225</d>
<d>87.25</d>
<d>87.275</d>
<d>87.3</d>
<d>87.325</d>
<d>87.35</d>
<d>87.375</d>
<d>87.4</d>
<d>87.425</d>
<d>87.45</d>
<d>87.475</d>
<d>87.5</d>
<d>87.525</d>
<d>87.55</d>
<d>87.575</d>
<d>87.6</d>
<d>87.625</d>
<d>87.65</d>
<d>87.675</d>
<d>87.7</d>
<d>87.725</d>
<d>87.75</d>
<d>87.775</d>
<d>87.8</d>
<d>87.825</d>
<d>87.85</d>
<d>87.875</d>
<d>87.9</d>
<d>87.925</d>
<d>87.95</d>
<d>87.975</d>
<d>88</d>
<d>88.025</d>
<d>88.05</d>
<d>88.075</d>
<d>88.1</d>
<d>88.125</d>
<d>88.15</d>
<d>88.175</d>
<d>88.2</d>
<d>88.225</d>
<d>88.25</d>
<d>88.275</d>
<d>88.3</d>
<d>88.325</d>
<d>88.35</d>
<d>88.375</d>
<d>88.4</d>
<d>88.425</d>
<d>88.45</d>
<d>88.475</d>
<d>88.5</d>
<d>88.525</d>
<d>88.55</d>
<d>88.575</d>
<d>88.6</d>
<d>88.625</d>
<d>88.65</d>
<d>88.675</d>
<d>88.7</d>
<d>88.725</d>
<d>88.75</d>
<d>88.775</d>
<d>88.8</d>
<d>88.825</d>
<d>88.85</d>
<d>88.875</d>
<d>88.9</d>
<d>88.925</d>
<d>88.95</d>
<d>88.975</d>
<d>89</d>
<d>89.025</d>
<d>89.05</d>
<d>89.075</d>
<d>89.1</d>
<d>89.125</d>
<d>89.15</d>
<d>89.175</d>
<d>89.2</d>
<d>89.225</d>
<d>89.25</d>
<d>89.275</d>
<d>89.3</d>
<d>89.325</d>
<d>89.35</d>
<d>89.375</d>
<d>89.4</d>
<d>89.425</d>
<d>89.45</d>
<d>89.475</d>
<d>89.5</d>
<d>89.525</d>
<d>89.55</d>
<d>89.575</d>
<d>89.6</d>
<d>89.625</d>
<d>89.65</d>
<d>89.675</d>
<d>89.7</d>
<d>89.725</d>
<d>89.75</d>
<d>89.775</d>
<d>89.8</d>
<d>89.825</d>
<d>89.85</d>
<d>89.875</d>
<d>89.9</d>
<d>89.925</d>
<d>89.95</d>
<d>89.975</d>
<d>90</d>
<d>90.025</d>
<d>90.05</d>
<d>90.075</d>
<d>90.1</d>
<d>90.125</d>
<d>90.15</d>
<d>90.175</d>
<d>90.2</d>
<d>90.225</d>
<d>90.25</d>
<d>90.275</d>
<d>90.3</d>
<d>90.325</d>
<d>90.35</d>
<d>90.375</d>
<d>90.4</d>
<d>90.425</d>
<d>90.45</d>
<d>90.475</d>
<d>90.5</d>
<d>90.525</d>
<d>90.55</d>
<d>90.575</d>
<d>90.6</d>
<d>90.625</d>
<d>90.65</d>
<d>90.675</d>
<d>90.7</d>
<d>90.725</d>
<d>90.75</d>
<d>90.775</d>
<d>90.8</d>
<d>90.825</d>
<d>90.85</d>
<d>90.875</d>
<d>90.9</d>
<d>90.925</d>
<d>90.95</d>
<d>90.975</d>
<d>91</d>
<d>91.025</d>
<d>91.05</d>
<d>91.075</d>
<d>91.1</d>
<d>91.125</d>
<d>91.15</d>
<d>91.175</d>
<d>91.2</d>
<d>91.225</d>
<d>91.25</d>
<d>91.275</d>
<d>91.3</d>
<d>91.325</d>
<d>91.35</d>
<d>91.375</d>
<d>91.4</d>
<d>91.425</d>
<d>91.45</d>
<d>91.475</d>
<d>91.5</d>
<d>91.525</d>
<d>91.55</d>
<d>91.575</d>
<d>91.6</d>
<d>91.625</d>
<d>91.65</d>
<d>91.675</d>
<d>91.7</d>
<d>91.725</d>
<d>91.75</d>
<d>91.775</d>
<d>91.8</d>
<d>91.825</d>
<d>91.85</d>
<d>91.875</d>
<d>91.9</d>
<d>91.925</d>
<d>91.95</d>
<d>91.975</d>
<d>92</d>
<d>92.025</d>
<d>92.05</d>
<d>92.075</d>
<d>92.1</d>
<d>92.125</d>
<d>92.15</d>
<d>92.175</d>
<d>92.2</d>
<d>92.225</d>
<d>92.25</d>
<d>92.275</d>
<d>92.3</d>
<d>92.325</d>
<d>92.35</d>
<d>92.375</d>
<d>92.4</d>
<d>92.425</d>
<d>92.45</d>
<d>92.475</d>
<d>92.5</d>
<d>92.525</d>
<d>92.55</d>
<d>92.575</d>
<d>92.6</d>
<d>92.625</d>
<d>92.65</d>
<d>92.675</d>
<d>92.7</d>
<d>92.725</d>
<d>92.75</d>
<d>92.775</d>
<d>92.8</d>
<d>92.825</d>
<d>92.85</d>
<d>92.875</d>
<d>92.9</d>
<d>92.925</d>
<d>92.95</d>
<d>92.975</d>
<d>93</d>
<d>93.025</d>
<d>93.05</d>
<d>93.075</d>
<d>93.1</d>
<d>93.125</d>
<d>93.15</d>
<d>93.175</d>
<d>93.2</d>
<d>93.225</d>
<d>93.25</d>
<d>93.275</d>
<d>93.3</d>
<d>93.325</d>
<d>93.35</d>
<d>93.375</d>
<d>93.4</d>
<d>93.425</d>
<d>93.45</d>
<d>93.475</d>
<d>93.5</d>
<d>93.525</d>
<d>93.55</d>
<d>93.575</d>
<d>93.6</d>
<d>93.625</d>
<d>93.65</d>
<d>93.675</d>
<d>93.7</d>
<d>93.725</d>
<d>93.75</d>
<d>93.775</d>
<d>93.8</d>
<d>93.825</d>
<d>93.85</d>
<d>93.875</d>
<d>93.9</d>
<d>93.925</d>
<d>93.95</d>
<d>93.975</d>
<d>94</d>
<d>94.025</d>
<d>94.05</d>
<d>94.075</d>
<d>94.1</d>
<d>94.125</d>
<d>94.15</d>
<d>94.175</d>
<d>94.2</d>
<d>94.225</d>
<d>94.25</d>
<d>94.275</d>
<d>94.3</d>
<d>94.325</d>
<d>94.35</d>
<d>94.375</d>
<d>94.4</d>
<d>94.425</d>
<d>94.45</d>
<d>94.475</d>
<d>94.5</d>
<d>94.525</d>
<d>94.55</d>
<d>94.575</d>
<d>94.6</d>
<d>94.625</d>
<d>94.65</d>
<d>94.675</d>
<d>94.7</d>
<d>94.725</d>
<d>94.75</d>
<d>94.775</d>
<d>94.8</d>
<d>94.825</d>
<d>94.85</d>
<d>94.875</d>
<d>94.9</d>
<d>94.925</d>
<d>94.95</d>
<d>94.975</d>
<d>95</d>
<d>95.025</d>
<d>95.05</d>
<d>95.075</d>
<d>95.1</d>
<d>95.125</d>
<d>95.15</d>
<d>95.175</d>
<d>95.2</d>
<d>95.225</d>
<d>95.25</d>
<d>95.275</d>
<d>95.3</d>
<d>95.325</d>
<d>95.35</d>
<d>95.375</d>
<d>95.4</d>
<d>95.425</d>
<d>95.45</d>
<d>95.475</d>
<d>95.5</d>
<d>95.525</d>
<d>95.55</d>
<d>95.575</d>
<d>95.6</d>
<d>95.625</d>
<d>95.65</d>
<d>95.675</d>
<d>95.7</d>
<d>95.725</d>
<d>95.75</d>
<d>95.775</d>
<d>95.8</d>
<d>95.825</d>
<d>95.85</d>
<d>95.875</d>
<d>95.9</d>
<d>95.925</d>
<d>95.95</d>
<d>95.975</d>
<d>96</d>
<d>96.025</d>
<d>96.05</d>
<d>96.075</d>
<d>96.1</d>
<d>96.125</d>
<d>96.15</d>
<d>96.175</d>
<d>96.2</d>
<d>96.225</d>
<d>96.25</d>
<d>96.275</d>
<d>96.3</d>
<d>96.325</d>
<d>96.35</d>
<d>96.375</d>
<d>96.4</d>
<d>96.425</d>
<d>96.45</d>
<d>96.475</d>
<d>96.5</d>
<d>96.525</d>
<d>96.55</d>
<d>96.575</d>
<d>96.6</d>
<d>96.625</d>
<d>96.65</d>
<d>96.675</d>
<d>96.7</d>
<d>96.725</d>
<d>96.75</d>
<d>96.775</d>
<d>96.8</d>
<d>96.825</d>
<d>96.85</d>
<d>96.875</d>
<d>96.9</d>
<d>96.925</d>
<d>96.95</d>
<d>96.975</d>
<d>97</d>
<d>97.025</d>
<d>97.05</d>
<d>97.075</d>
<d>97.1</d>
<d>97.125</d>
<d>97.15</d>
<d>97.175</d>
<d>97.2</d>
<d>97.225</d>
<d>97.25</d>
<d>97.275</d>
<d>97.3</d>
<d>97.325</d>
<d>97.35</d>
<d>97.375</d>
<d>97.4</d>
<d>97.425</d>
<d>97.45</d>
<d>97.475</d>
<d>97.5</d>
<d>97.525</d>
<d>97.55</d>
<d>97.575</d>
<d>97.6</d>
<d>97.625</d>
<d>97.65</d>
<d>97.675</d>
<d>97.7</d>
<d>97.725</d>
<d>97.75</d>
<d>97.775</d>
<d>97.8</d>
<d>97.825</d>
<d>97.85</d>
<d>97.875</d>
<d>97.9</d>
<d>97.925</d>
<d>97.95</d>
<d>97.975</d>
<d>98</d>
<d>98.025</d>
<d>98.05</d>
<d>98.075</d>
<d>98.1</d>
<d>98.125</d>
<d>98.15</d>
<d>98.175</d>
<d>98.2</d>
<d>98.225</d>
<d>98.25</d>
<d>98.275</d>
<d>98.3</d>
<d>98.325</d>
<d>98.35</d>
<d>98.375</d>
<d>98.4</d>
<d>98.425</d>
<d>98.45</d>
<d>98.475</d>
<d>98.5</d>
<d>98.525</d>
<d>98.55</d>
<d>98.575</d>
<d>98.6</d>
<d>98.625</d>
<d>98.65</d>
<d>98.675</d>
<d>98.7</d>
<d>98.725</d>
<d>98.75</d>
<d>98.775</d>
<d>98.8</d>
<d>98.825</d>
<d>98.85</d>
<d>98.875</d>
<d>98.9</d>
<d>98.925</d>
<d>98.95</d>
<d>98.975</d>
<d>99</d>
<d>99.025</d>
<d>99.05</d>
<d>99.075</d>
<d>99.1</d>
<d>99.125</d>
<d>99.15</d>
<d>99.175</d>
<d>99.2</d>
<d>99.225</d>
<d>99.25</d>
<d>99.275</d>
<d>99.3</d>
<d>99.325</d>
<d>99.35</d>
<d>99.375</d>
<d>99.4</d>
<d>99.425</d>
<d>99.45</d>
<d>99.475</d>
<d>99.5</d>
<d>99.525</d>
<d>99.55</d>
<d>99.575</d>
<d>99.6</d>
<d>99.625</d>
<d>99.65</d>
<d>99.675</d>
<d>99.7</d>
<d>99.725</d>
<d>99.75</d>
<d>99.775</d>
<d>99.8</d>
<d>99.825</d>
<d>99.85</d>
<d>99.875</d>
<d>99.9</d>
<d>99.925</d>
<d>99.95</d>
<d>99.975</d>
</Subcolumn>
</XColumn>
<XAdvancedColumn Version="1" Width="125" Decimals="6" Subcolumns="1">
<Title>Time (ms)</Title>
<Subcolumn>
<d>0</d>
<d>0.05</d>
<d>0.1</d>
<d>0.15</d>
<d>0.2</d>
<d>0.25</d>
<d>0.3</d>
<d>0.35</d>
<d>0.4</d>
<d>0.45</d>
<d>0.5</d>
<d>0.55</d>
<d>0.6</d>
<d>0.65</d>
<d>0.7</d>
<d>0.75</d>
<d>0.8</d>
<d>0.85</d>
<d>0.9</d>
<d>0.95</d>
<d>1</d>
<d>1.05</d>
<d>1.1</d>
<d>1.15</d>
<d>1.2</d>
<d>1.25</d>
<d>1.3</d>
<d>1.35</d>
<d>1.4</d>
<d>1.45</d>
<d>1.5</d>
<d>1.55</d>
<d>1.6</d>
<d>1.65</d>
<d>1.7</d>
<d>1.75</d>
<d>1.8</d>
<d>1.85</d>
<d>1.9</d>
<d>1.95</d>
<d>2</d>
<d>2.05</d>
<d>2.1</d>
<d>2.15</d>
<d>2.2</d>
<d>2.25</d>
<d>2.3</d>
<d>2.35</d>
<d>2.4</d>
<d>2.45</d>
<d>2.5</d>
<d>2.55</d>
<d>2.6</d>
<d>2.65</d>
<d>2.7</d>
<d>2.75</d>
<d>2.8</d>
<d>2.85</d>
<d>2.9</d>
<d>2.95</d>
<d>3</d>
<d>3.05</d>
<d>3.1</d>
<d>3.15</d>
<d>3.2</d>
<d>3.25</d>
<d>3.3</d>
<d>3.35</d>
<d>3.4</d>
<d>3.45</d>
<d>3.5</d>
<d>3.55</d>
<d>3.6</d>
<d>3.65</d>
<d>3.7</d>
<d>3.75</d>
<d>3.8</d>
<d>3.85</d>
<d>3.9</d>
<d>3.95</d>
<d>4</d>
<d>4.05</d>
<d>4.1</d>
<d>4.15</d>
<d>4.2</d>
<d>4.25</d>
<d>4.3</d>
<d>4.35</d>
<d>4.4</d>
<d>4.45</d>
<d>4.5</d>
<d>4.55</d>
<d>4.6</d>
<d>4.65</d>
<d>4.7</d>
<d>4.75</d>
<d>4.8</d>
<d>4.85</d>
<d>4.9</d>
<d>4.95</d>
<d>5</d>
<d>5.05</d>
<d>5.1</d>
<d>5.15</d>
<d>5.2</d>
<d>5.25</d>
<d>5.3</d>
<d>5.35</d>
<d>5.4</d>
<d>5.45</d>
<d>5.5</d>
<d>5.55</d>
<d>5.6</d>
<d>5.65</d>
<d>5.7</d>
<d>5.75</d>
<d>5.8</d>
<d>5.85</d>
<d>5.9</d>
<d>5.95</d>
<d>6</d>
<d>6.05</d>
<d>6.1</d>
<d>6.15</d>
<d>6.2</d>
<d>6.25</d>
<d>6.3</d>
<d>6.35</d>
<d>6.4</d>
<d>6.45</d>
<d>6.5</d>
<d>6.55</d>
<d>6.6</d>
<d>6.65</d>
<d>6.7</d>
<d>6.75</d>
<d>6.8</d>
<d>6.85</d>
<d>6.9</d>
<d>6.95</d>
<d>7</d>
<d>7.05</d>
<d>7.1</d>
<d>7.15</d>
<d>7.2</d>
<d>7.25</d>
<d>7.3</d>
<d>7.35</d>
<d>7.4</d>
<d>7.45</d>
<d>7.5</d>
<d>7.55</d>
<d>7.6</d>
<d>7.65</d>
<d>7.7</d>
<d>7.75</d>
<d>7.8</d>
<d>7.85</d>
<d>7.9</d>
<d>7.95</d>
<d>8</d>
<d>8.05</d>
<d>8.1</d>
<d>8.15</d>
<d>8.2</d>
<d>8.25</d>
<d>8.3</d>
<d>8.35</d>
<d>8.4</d>
<d>8.45</d>
<d>8.5</d>
<d>8.55</d>
<d>8.6</d>
<d>8.65</d>
<d>8.7</d>
<d>8.75</d>
<d>8.8</d>
<d>8.85</d>
<d>8.9</d>
<d>8.95</d>
<d>9</d>
<d>9.05</d>
<d>9.1</d>
<d>9.15</d>
<d>9.2</d>
<d>9.25</d>
<d>9.3</d>
<d>9.35</d>
<d>9.4</d>
<d>9.45</d>
<d>9.5</d>
<d>9.55</d>
<d>9.6</d>
<d>9.65</d>
<d>9.7</d>
<d>9.75</d>
<d>9.8</d>
<d>9.85</d>
<d>9.9</d>
<d>9.95</d>
<d>10</d>
<d>10.05</d>
<d>10.1</d>
<d>10.15</d>
<d>10.2</d>
<d>10.25</d>
<d>10.3</d>
<d>10.35</d>
<d>10.4</d>
<d>10.45</d>
<d>10.5</d>
<d>10.55</d>
<d>10.6</d>
<d>10.65</d>
<d>10.7</d>
<d>10.75</d>
<d>10.8</d>
<d>10.85</d>
<d>10.9</d>
<d>10.95</d>
<d>11</d>
<d>11.05</d>
<d>11.1</d>
<d>11.15</d>
<d>11.2</d>
<d>11.25</d>
<d>11.3</d>
<d>11.35</d>
<d>11.4</d>
<d>11.45</d>
<d>11.5</d>
<d>11.55</d>
<d>11.6</d>
<d>11.65</d>
<d>11.7</d>
<d>11.75</d>
<d>11.8</d>
<d>11.85</d>
<d>11.9</d>
<d>11.95</d>
<d>12</d>
<d>12.05</d>
<d>12.1</d>
<d>12.15</d>
<d>12.2</d>
<d>12.25</d>
<d>12.3</d>
<d>12.35</d>
<d>12.4</d>
<d>12.45</d>
<d>12.5</d>
<d>12.55</d>
<d>12.6</d>
<d>12.65</d>
<d>12.7</d>
<d>12.75</d>
<d>12.8</d>
<d>12.85</d>
<d>12.9</d>
<d>12.95</d>
<d>13</d>
<d>13.05</d>
<d>13.1</d>
<d>13.15</d>
<d>13.2</d>
<d>13.25</d>
<d>13.3</d>
<d>13.35</d>
<d>13.4</d>
<d>13.45</d>
<d>13.5</d>
<d>13.55</d>
<d>13.6</d>
<d>13.65</d>
<d>13.7</d>
<d>13.75</d>
<d>13.8</d>
<d>13.85</d>
<d>13.9</d>
<d>13.95</d>
<d>14</d>
<d>14.05</d>
<d>14.1</d>
<d>14.15</d>
<d>14.2</d>
<d>14.25</d>
<d>14.3</d>
<d>14.35</d>
<d>14.4</d>
<d>14.45</d>
<d>14.5</d>
<d>14.55</d>
<d>14.6</d>
<d>14.65</d>
<d>14.7</d>
<d>14.75</d>
<d>14.8</d>
<d>14.85</d>
<d>14.9</d>
<d>14.95</d>
<d>15</d>
<d>15.05</d>
<d>15.1</d>
<d>15.15</d>
<d>15.2</d>
<d>15.25</d>
<d>15.3</d>
<d>15.35</d>
<d>15.4</d>
<d>15.45</d>
<d>15.5</d>
<d>15.55</d>
<d>15.6</d>
<d>15.65</d>
<d>15.7</d>
<d>15.75</d>
<d>15.8</d>
<d>15.85</d>
<d>15.9</d>
<d>15.95</d>
<d>16</d>
<d>16.049999</d>
<d>16.1</d>
<d>16.15</d>
<d>16.200001</d>
<d>16.25</d>
<d>16.299999</d>
<d>16.35</d>
<d>16.4</d>
<d>16.450001</d>
<d>16.5</d>
<d>16.549999</d>
<d>16.6</d>
<d>16.65</d>
<d>16.700001</d>
<d>16.75</d>
<d>16.799999</d>
<d>16.85</d>
<d>16.9</d>
<d>16.950001</d>
<d>17</d>
<d>17.049999</d>
<d>17.1</d>
<d>17.15</d>
<d>17.200001</d>
<d>17.25</d>
<d>17.299999</d>
<d>17.35</d>
<d>17.4</d>
<d>17.450001</d>
<d>17.5</d>
<d>17.549999</d>
<d>17.6</d>
<d>17.65</d>
<d>17.700001</d>
<d>17.75</d>
<d>17.799999</d>
<d>17.85</d>
<d>17.9</d>
<d>17.950001</d>
<d>18</d>
<d>18.049999</d>
<d>18.1</d>
<d>18.15</d>
<d>18.200001</d>
<d>18.25</d>
<d>18.299999</d>
<d>18.35</d>
<d>18.4</d>
<d>18.450001</d>
<d>18.5</d>
<d>18.549999</d>
<d>18.6</d>
<d>18.65</d>
<d>18.700001</d>
<d>18.75</d>
<d>18.799999</d>
<d>18.85</d>
<d>18.9</d>
<d>18.950001</d>
<d>19</d>
<d>19.049999</d>
<d>19.1</d>
<d>19.15</d>
<d>19.200001</d>
<d>19.25</d>
<d>19.299999</d>
<d>19.35</d>
<d>19.4</d>
<d>19.450001</d>
<d>19.5</d>
<d>19.549999</d>
<d>19.6</d>
<d>19.65</d>
<d>19.700001</d>
<d>19.75</d>
<d>19.799999</d>
<d>19.85</d>
<d>19.9</d>
<d>19.950001</d>
<d>20</d>
<d>20.049999</d>
<d>20.1</d>
<d>20.15</d>
<d>20.200001</d>
<d>20.25</d>
<d>20.299999</d>
<d>20.35</d>
<d>20.4</d>
<d>20.450001</d>
<d>20.5</d>
<d>20.549999</d>
<d>20.6</d>
<d>20.65</d>
<d>20.700001</d>
<d>20.75</d>
<d>20.799999</d>
<d>20.85</d>
<d>20.9</d>
<d>20.950001</d>
<d>21</d>
<d>21.049999</d>
<d>21.1</d>
<d>21.15</d>
<d>21.200001</d>
<d>21.25</d>
<d>21.299999</d>
<d>21.35</d>
<d>21.4</d>
<d>21.450001</d>
<d>21.5</d>
<d>21.549999</d>
<d>21.6</d>
<d>21.65</d>
<d>21.700001</d>
<d>21.75</d>
<d>21.799999</d>
<d>21.85</d>
<d>21.9</d>
<d>21.950001</d>
<d>22</d>
<d>22.049999</d>
<d>22.1</d>
<d>22.15</d>
<d>22.200001</d>
<d>22.25</d>
<d>22.299999</d>
<d>22.35</d>
<d>22.4</d>
<d>22.450001</d>
<d>22.5</d>
<d>22.549999</d>
<d>22.6</d>
<d>22.65</d>
<d>22.700001</d>
<d>22.75</d>
<d>22.799999</d>
<d>22.85</d>
<d>22.9</d>
<d>22.950001</d>
<d>23</d>
<d>23.049999</d>
<d>23.1</d>
<d>23.15</d>
<d>23.200001</d>
<d>23.25</d>
<d>23.299999</d>
<d>23.35</d>
<d>23.4</d>
<d>23.450001</d>
<d>23.5</d>
<d>23.549999</d>
<d>23.6</d>
<d>23.65</d>
<d>23.700001</d>
<d>23.75</d>
<d>23.799999</d>
<d>23.85</d>
<d>23.9</d>
<d>23.950001</d>
<d>24</d>
<d>24.049999</d>
<d>24.1</d>
<d>24.15</d>
<d>24.200001</d>
<d>24.25</d>
<d>24.299999</d>
<d>24.35</d>
<d>24.4</d>
<d>24.450001</d>
<d>24.5</d>
<d>24.549999</d>
<d>24.6</d>
<d>24.65</d>
<d>24.700001</d>
<d>24.75</d>
<d>24.799999</d>
<d>24.85</d>
<d>24.9</d>
<d>24.950001</d>
<d>25</d>
<d>25.049999</d>
<d>25.1</d>
<d>25.15</d>
<d>25.200001</d>
<d>25.25</d>
<d>25.299999</d>
<d>25.35</d>
<d>25.4</d>
<d>25.450001</d>
<d>25.5</d>
<d>25.549999</d>
<d>25.6</d>
<d>25.65</d>
<d>25.700001</d>
<d>25.75</d>
<d>25.799999</d>
<d>25.85</d>
<d>25.9</d>
<d>25.950001</d>
<d>26</d>
<d>26.049999</d>
<d>26.1</d>
<d>26.15</d>
<d>26.200001</d>
<d>26.25</d>
<d>26.299999</d>
<d>26.35</d>
<d>26.4</d>
<d>26.450001</d>
<d>26.5</d>
<d>26.549999</d>
<d>26.6</d>
<d>26.65</d>
<d>26.700001</d>
<d>26.75</d>
<d>26.799999</d>
<d>26.85</d>
<d>26.9</d>
<d>26.950001</d>
<d>27</d>
<d>27.049999</d>
<d>27.1</d>
<d>27.15</d>
<d>27.200001</d>
<d>27.25</d>
<d>27.299999</d>
<d>27.35</d>
<d>27.4</d>
<d>27.450001</d>
<d>27.5</d>
<d>27.549999</d>
<d>27.6</d>
<d>27.65</d>
<d>27.700001</d>
<d>27.75</d>
<d>27.799999</d>
<d>27.85</d>
<d>27.9</d>
<d>27.950001</d>
<d>28</d>
<d>28.049999</d>
<d>28.1</d>
<d>28.15</d>
<d>28.200001</d>
<d>28.25</d>
<d>28.299999</d>
<d>28.35</d>
<d>28.4</d>
<d>28.450001</d>
<d>28.5</d>
<d>28.549999</d>
<d>28.6</d>
<d>28.65</d>
<d>28.700001</d>
<d>28.75</d>
<d>28.799999</d>
<d>28.85</d>
<d>28.9</d>
<d>28.950001</d>
<d>29</d>
<d>29.049999</d>
<d>29.1</d>
<d>29.15</d>
<d>29.200001</d>
<d>29.25</d>
<d>29.299999</d>
<d>29.35</d>
<d>29.4</d>
<d>29.450001</d>
<d>29.5</d>
<d>29.549999</d>
<d>29.6</d>
<d>29.65</d>
<d>29.700001</d>
<d>29.75</d>
<d>29.799999</d>
<d>29.85</d>
<d>29.9</d>
<d>29.950001</d>
<d>30</d>
<d>30.049999</d>
<d>30.1</d>
<d>30.15</d>
<d>30.200001</d>
<d>30.25</d>
<d>30.299999</d>
<d>30.35</d>
<d>30.4</d>
<d>30.450001</d>
<d>30.5</d>
<d>30.549999</d>
<d>30.6</d>
<d>30.65</d>
<d>30.700001</d>
<d>30.75</d>
<d>30.799999</d>
<d>30.85</d>
<d>30.9</d>
<d>30.950001</d>
<d>31</d>
<d>31.049999</d>
<d>31.1</d>
<d>31.15</d>
<d>31.200001</d>
<d>31.25</d>
<d>31.299999</d>
<d>31.35</d>
<d>31.4</d>
<d>31.450001</d>
<d>31.5</d>
<d>31.549999</d>
<d>31.6</d>
<d>31.65</d>
<d>31.700001</d>
<d>31.75</d>
<d>31.799999</d>
<d>31.85</d>
<d>31.9</d>
<d>31.950001</d>
<d>32</d>
<d>32.049999</d>
<d>32.099998</d>
<d>32.150002</d>
<d>32.200001</d>
<d>32.25</d>
<d>32.299999</d>
<d>32.349998</d>
<d>32.400002</d>
<d>32.450001</d>
<d>32.5</d>
<d>32.549999</d>
<d>32.599998</d>
<d>32.650002</d>
<d>32.700001</d>
<d>32.75</d>
<d>32.799999</d>
<d>32.849998</d>
<d>32.900002</d>
<d>32.950001</d>
<d>33</d>
<d>33.049999</d>
<d>33.099998</d>
<d>33.150002</d>
<d>33.200001</d>
<d>33.25</d>
<d>33.299999</d>
<d>33.349998</d>
<d>33.400002</d>
<d>33.450001</d>
<d>33.5</d>
<d>33.549999</d>
<d>33.599998</d>
<d>33.650002</d>
<d>33.700001</d>
<d>33.75</d>
<d>33.799999</d>
<d>33.849998</d>
<d>33.900002</d>
<d>33.950001</d>
<d>34</d>
<d>34.049999</d>
<d>34.099998</d>
<d>34.150002</d>
<d>34.200001</d>
<d>34.25</d>
<d>34.299999</d>
<d>34.349998</d>
<d>34.400002</d>
<d>34.450001</d>
<d>34.5</d>
<d>34.549999</d>
<d>34.599998</d>
<d>34.650002</d>
<d>34.700001</d>
<d>34.75</d>
<d>34.799999</d>
<d>34.849998</d>
<d>34.900002</d>
<d>34.950001</d>
<d>35</d>
<d>35.049999</d>
<d>35.099998</d>
<d>35.150002</d>
<d>35.200001</d>
<d>35.25</d>
<d>35.299999</d>
<d>35.349998</d>
<d>35.400002</d>
<d>35.450001</d>
<d>35.5</d>
<d>35.549999</d>
<d>35.599998</d>
<d>35.650002</d>
<d>35.700001</d>
<d>35.75</d>
<d>35.799999</d>
<d>35.849998</d>
<d>35.900002</d>
<d>35.950001</d>
<d>36</d>
<d>36.049999</d>
<d>36.099998</d>
<d>36.150002</d>
<d>36.200001</d>
<d>36.25</d>
<d>36.299999</d>
<d>36.349998</d>
<d>36.400002</d>
<d>36.450001</d>
<d>36.5</d>
<d>36.549999</d>
<d>36.599998</d>
<d>36.650002</d>
<d>36.700001</d>
<d>36.75</d>
<d>36.799999</d>
<d>36.849998</d>
<d>36.900002</d>
<d>36.950001</d>
<d>37</d>
<d>37.049999</d>
<d>37.099998</d>
<d>37.150002</d>
<d>37.200001</d>
<d>37.25</d>
<d>37.299999</d>
<d>37.349998</d>
<d>37.400002</d>
<d>37.450001</d>
<d>37.5</d>
<d>37.549999</d>
<d>37.599998</d>
<d>37.650002</d>
<d>37.700001</d>
<d>37.75</d>
<d>37.799999</d>
<d>37.849998</d>
<d>37.900002</d>
<d>37.950001</d>
<d>38</d>
<d>38.049999</d>
<d>38.099998</d>
<d>38.150002</d>
<d>38.200001</d>
<d>38.25</d>
<d>38.299999</d>
<d>38.349998</d>
<d>38.400002</d>
<d>38.450001</d>
<d>38.5</d>
<d>38.549999</d>
<d>38.599998</d>
<d>38.650002</d>
<d>38.700001</d>
<d>38.75</d>
<d>38.799999</d>
<d>38.849998</d>
<d>38.900002</d>
<d>38.950001</d>
<d>39</d>
<d>39.049999</d>
<d>39.099998</d>
<d>39.150002</d>
<d>39.200001</d>
<d>39.25</d>
<d>39.299999</d>
<d>39.349998</d>
<d>39.400002</d>
<d>39.450001</d>
<d>39.5</d>
<d>39.549999</d>
<d>39.599998</d>
<d>39.650002</d>
<d>39.700001</d>
<d>39.75</d>
<d>39.799999</d>
<d>39.849998</d>
<d>39.900002</d>
<d>39.950001</d>
<d>40</d>
<d>40.049999</d>
<d>40.099998</d>
<d>40.150002</d>
<d>40.200001</d>
<d>40.25</d>
<d>40.299999</d>
<d>40.349998</d>
<d>40.400002</d>
<d>40.450001</d>
<d>40.5</d>
<d>40.549999</d>
<d>40.599998</d>
<d>40.650002</d>
<d>40.700001</d>
<d>40.75</d>
<d>40.799999</d>
<d>40.849998</d>
<d>40.900002</d>
<d>40.950001</d>
<d>41</d>
<d>41.049999</d>
<d>41.099998</d>
<d>41.150002</d>
<d>41.200001</d>
<d>41.25</d>
<d>41.299999</d>
<d>41.349998</d>
<d>41.400002</d>
<d>41.450001</d>
<d>41.5</d>
<d>41.549999</d>
<d>41.599998</d>
<d>41.650002</d>
<d>41.700001</d>
<d>41.75</d>
<d>41.799999</d>
<d>41.849998</d>
<d>41.900002</d>
<d>41.950001</d>
<d>42</d>
<d>42.049999</d>
<d>42.099998</d>
<d>42.150002</d>
<d>42.200001</d>
<d>42.25</d>
<d>42.299999</d>
<d>42.349998</d>
<d>42.400002</d>
<d>42.450001</d>
<d>42.5</d>
<d>42.549999</d>
<d>42.599998</d>
<d>42.650002</d>
<d>42.700001</d>
<d>42.75</d>
<d>42.799999</d>
<d>42.849998</d>
<d>42.900002</d>
<d>42.950001</d>
<d>43</d>
<d>43.049999</d>
<d>43.099998</d>
<d>43.150002</d>
<d>43.200001</d>
<d>43.25</d>
<d>43.299999</d>
<d>43.349998</d>
<d>43.400002</d>
<d>43.450001</d>
<d>43.5</d>
<d>43.549999</d>
<d>43.599998</d>
<d>43.650002</d>
<d>43.700001</d>
<d>43.75</d>
<d>43.799999</d>
<d>43.849998</d>
<d>43.900002</d>
<d>43.950001</d>
<d>44</d>
<d>44.049999</d>
<d>44.099998</d>
<d>44.150002</d>
<d>44.200001</d>
<d>44.25</d>
<d>44.299999</d>
<d>44.349998</d>
<d>44.400002</d>
<d>44.450001</d>
<d>44.5</d>
<d>44.549999</d>
<d>44.599998</d>
<d>44.650002</d>
<d>44.700001</d>
<d>44.75</d>
<d>44.799999</d>
<d>44.849998</d>
<d>44.900002</d>
<d>44.950001</d>
<d>45</d>
<d>45.049999</d>
<d>45.099998</d>
<d>45.150002</d>
<d>45.200001</d>
<d>45.25</d>
<d>45.299999</d>
<d>45.349998</d>
<d>45.400002</d>
<d>45.450001</d>
<d>45.5</d>
<d>45.549999</d>
<d>45.599998</d>
<d>45.650002</d>
<d>45.700001</d>
<d>45.75</d>
<d>45.799999</d>
<d>45.849998</d>
<d>45.900002</d>
<d>45.950001</d>
<d>46</d>
<d>46.049999</d>
<d>46.099998</d>
<d>46.150002</d>
<d>46.200001</d>
<d>46.25</d>
<d>46.299999</d>
<d>46.349998</d>
<d>46.400002</d>
<d>46.450001</d>
<d>46.5</d>
<d>46.549999</d>
<d>46.599998</d>
<d>46.650002</d>
<d>46.700001</d>
<d>46.75</d>
<d>46.799999</d>
<d>46.849998</d>
<d>46.900002</d>
<d>46.950001</d>
<d>47</d>
<d>47.049999</d>
<d>47.099998</d>
<d>47.150002</d>
<d>47.200001</d>
<d>47.25</d>
<d>47.299999</d>
<d>47.349998</d>
<d>47.400002</d>
<d>47.450001</d>
<d>47.5</d>
<d>47.549999</d>
<d>47.599998</d>
<d>47.650002</d>
<d>47.700001</d>
<d>47.75</d>
<d>47.799999</d>
<d>47.849998</d>
<d>47.900002</d>
<d>47.950001</d>
<d>48</d>
<d>48.049999</d>
<d>48.099998</d>
<d>48.150002</d>
<d>48.200001</d>
<d>48.25</d>
<d>48.299999</d>
<d>48.349998</d>
<d>48.400002</d>
<d>48.450001</d>
<d>48.5</d>
<d>48.549999</d>
<d>48.599998</d>
<d>48.650002</d>
<d>48.700001</d>
<d>48.75</d>
<d>48.799999</d>
<d>48.849998</d>
<d>48.900002</d>
<d>48.950001</d>
<d>49</d>
<d>49.049999</d>
<d>49.099998</d>
<d>49.150002</d>
<d>49.200001</d>
<d>49.25</d>
<d>49.299999</d>
<d>49.349998</d>
<d>49.400002</d>
<d>49.450001</d>
<d>49.5</d>
<d>49.549999</d>
<d>49.599998</d>
<d>49.650002</d>
<d>49.700001</d>
<d>49.75</d>
<d>49.799999</d>
<d>49.849998</d>
<d>49.900002</d>
<d>49.950001</d>
<d>50</d>
<d>50.049999</d>
<d>50.099998</d>
<d>50.150002</d>
<d>50.200001</d>
<d>50.25</d>
<d>50.299999</d>
<d>50.349998</d>
<d>50.400002</d>
<d>50.450001</d>
<d>50.5</d>
<d>50.549999</d>
<d>50.599998</d>
<d>50.650002</d>
<d>50.700001</d>
<d>50.75</d>
<d>50.799999</d>
<d>50.849998</d>
<d>50.900002</d>
<d>50.950001</d>
<d>51</d>
<d>51.049999</d>
<d>51.099998</d>
<d>51.150002</d>
<d>51.200001</d>
<d>51.25</d>
<d>51.299999</d>
<d>51.349998</d>
<d>51.400002</d>
<d>51.450001</d>
<d>51.5</d>
<d>51.549999</d>
<d>51.599998</d>
<d>51.650002</d>
<d>51.700001</d>
<d>51.75</d>
<d>51.799999</d>
<d>51.849998</d>
<d>51.900002</d>
<d>51.950001</d>
<d>52</d>
<d>52.049999</d>
<d>52.099998</d>
<d>52.150002</d>
<d>52.200001</d>
<d>52.25</d>
<d>52.299999</d>
<d>52.349998</d>
<d>52.400002</d>
<d>52.450001</d>
<d>52.5</d>
<d>52.549999</d>
<d>52.599998</d>
<d>52.650002</d>
<d>52.700001</d>
<d>52.75</d>
<d>52.799999</d>
<d>52.849998</d>
<d>52.900002</d>
<d>52.950001</d>
<d>53</d>
<d>53.049999</d>
<d>53.099998</d>
<d>53.150002</d>
<d>53.200001</d>
<d>53.25</d>
<d>53.299999</d>
<d>53.349998</d>
<d>53.400002</d>
<d>53.450001</d>
<d>53.5</d>
<d>53.549999</d>
<d>53.599998</d>
<d>53.650002</d>
<d>53.700001</d>
<d>53.75</d>
<d>53.799999</d>
<d>53.849998</d>
<d>53.900002</d>
<d>53.950001</d>
<d>54</d>
<d>54.049999</d>
<d>54.099998</d>
<d>54.150002</d>
<d>54.200001</d>
<d>54.25</d>
<d>54.299999</d>
<d>54.349998</d>
<d>54.400002</d>
<d>54.450001</d>
<d>54.5</d>
<d>54.549999</d>
<d>54.599998</d>
<d>54.650002</d>
<d>54.700001</d>
<d>54.75</d>
<d>54.799999</d>
<d>54.849998</d>
<d>54.900002</d>
<d>54.950001</d>
<d>55</d>
<d>55.049999</d>
<d>55.099998</d>
<d>55.150002</d>
<d>55.200001</d>
<d>55.25</d>
<d>55.299999</d>
<d>55.349998</d>
<d>55.400002</d>
<d>55.450001</d>
<d>55.5</d>
<d>55.549999</d>
<d>55.599998</d>
<d>55.650002</d>
<d>55.700001</d>
<d>55.75</d>
<d>55.799999</d>
<d>55.849998</d>
<d>55.900002</d>
<d>55.950001</d>
<d>56</d>
<d>56.049999</d>
<d>56.099998</d>
<d>56.150002</d>
<d>56.200001</d>
<d>56.25</d>
<d>56.299999</d>
<d>56.349998</d>
<d>56.400002</d>
<d>56.450001</d>
<d>56.5</d>
<d>56.549999</d>
<d>56.599998</d>
<d>56.650002</d>
<d>56.700001</d>
<d>56.75</d>
<d>56.799999</d>
<d>56.849998</d>
<d>56.900002</d>
<d>56.950001</d>
<d>57</d>
<d>57.049999</d>
<d>57.099998</d>
<d>57.150002</d>
<d>57.200001</d>
<d>57.25</d>
<d>57.299999</d>
<d>57.349998</d>
<d>57.400002</d>
<d>57.450001</d>
<d>57.5</d>
<d>57.549999</d>
<d>57.599998</d>
<d>57.650002</d>
<d>57.700001</d>
<d>57.75</d>
<d>57.799999</d>
<d>57.849998</d>
<d>57.900002</d>
<d>57.950001</d>
<d>58</d>
<d>58.049999</d>
<d>58.099998</d>
<d>58.150002</d>
<d>58.200001</d>
<d>58.25</d>
<d>58.299999</d>
<d>58.349998</d>
<d>58.400002</d>
<d>58.450001</d>
<d>58.5</d>
<d>58.549999</d>
<d>58.599998</d>
<d>58.650002</d>
<d>58.700001</d>
<d>58.75</d>
<d>58.799999</d>
<d>58.849998</d>
<d>58.900002</d>
<d>58.950001</d>
<d>59</d>
<d>59.049999</d>
<d>59.099998</d>
<d>59.150002</d>
<d>59.200001</d>
<d>59.25</d>
<d>59.299999</d>
<d>59.349998</d>
<d>59.400002</d>
<d>59.450001</d>
<d>59.5</d>
<d>59.549999</d>
<d>59.599998</d>
<d>59.650002</d>
<d>59.700001</d>
<d>59.75</d>
<d>59.799999</d>
<d>59.849998</d>
<d>59.900002</d>
<d>59.950001</d>
<d>60</d>
<d>60.049999</d>
<d>60.099998</d>
<d>60.150002</d>
<d>60.200001</d>
<d>60.25</d>
<d>60.299999</d>
<d>60.349998</d>
<d>60.400002</d>
<d>60.450001</d>
<d>60.5</d>
<d>60.549999</d>
<d>60.599998</d>
<d>60.650002</d>
<d>60.700001</d>
<d>60.75</d>
<d>60.799999</d>
<d>60.849998</d>
<d>60.900002</d>
<d>60.950001</d>
<d>61</d>
<d>61.049999</d>
<d>61.099998</d>
<d>61.150002</d>
<d>61.200001</d>
<d>61.25</d>
<d>61.299999</d>
<d>61.349998</d>
<d>61.400002</d>
<d>61.450001</d>
<d>61.5</d>
<d>61.549999</d>
<d>61.599998</d>
<d>61.650002</d>
<d>61.700001</d>
<d>61.75</d>
<d>61.799999</d>
<d>61.849998</d>
<d>61.900002</d>
<d>61.950001</d>
<d>62</d>
<d>62.049999</d>
<d>62.099998</d>
<d>62.150002</d>
<d>62.200001</d>
<d>62.25</d>
<d>62.299999</d>
<d>62.349998</d>
<d>62.400002</d>
<d>62.450001</d>
<d>62.5</d>
<d>62.549999</d>
<d>62.599998</d>
<d>62.650002</d>
<d>62.700001</d>
<d>62.75</d>
<d>62.799999</d>
<d>62.849998</d>
<d>62.900002</d>
<d>62.950001</d>
<d>63</d>
<d>63.049999</d>
<d>63.099998</d>
<d>63.150002</d>
<d>63.200001</d>
<d>63.25</d>
<d>63.299999</d>
<d>63.349998</d>
<d>63.400002</d>
<d>63.450001</d>
<d>63.5</d>
<d>63.549999</d>
<d>63.599998</d>
<d>63.650002</d>
<d>63.700001</d>
<d>63.75</d>
<d>63.799999</d>
<d>63.849998</d>
<d>63.900002</d>
<d>63.950001</d>
<d>64</d>
<d>64.050003</d>
<d>64.099998</d>
<d>64.150002</d>
<d>64.199997</d>
<d>64.25</d>
<d>64.300003</d>
<d>64.349998</d>
<d>64.400002</d>
<d>64.449997</d>
<d>64.5</d>
<d>64.550003</d>
<d>64.599998</d>
<d>64.650002</d>
<d>64.699997</d>
<d>64.75</d>
<d>64.800003</d>
<d>64.849998</d>
<d>64.900002</d>
<d>64.949997</d>
<d>65</d>
<d>65.050003</d>
<d>65.099998</d>
<d>65.150002</d>
<d>65.199997</d>
<d>65.25</d>
<d>65.300003</d>
<d>65.349998</d>
<d>65.400002</d>
<d>65.449997</d>
<d>65.5</d>
<d>65.550003</d>
<d>65.599998</d>
<d>65.650002</d>
<d>65.699997</d>
<d>65.75</d>
<d>65.800003</d>
<d>65.849998</d>
<d>65.900002</d>
<d>65.949997</d>
<d>66</d>
<d>66.050003</d>
<d>66.099998</d>
<d>66.150002</d>
<d>66.199997</d>
<d>66.25</d>
<d>66.300003</d>
<d>66.349998</d>
<d>66.400002</d>
<d>66.449997</d>
<d>66.5</d>
<d>66.550003</d>
<d>66.599998</d>
<d>66.650002</d>
<d>66.699997</d>
<d>66.75</d>
<d>66.800003</d>
<d>66.849998</d>
<d>66.900002</d>
<d>66.949997</d>
<d>67</d>
<d>67.050003</d>
<d>67.099998</d>
<d>67.150002</d>
<d>67.199997</d>
<d>67.25</d>
<d>67.300003</d>
<d>67.349998</d>
<d>67.400002</d>
<d>67.449997</d>
<d>67.5</d>
<d>67.550003</d>
<d>67.599998</d>
<d>67.650002</d>
<d>67.699997</d>
<d>67.75</d>
<d>67.800003</d>
<d>67.849998</d>
<d>67.900002</d>
<d>67.949997</d>
<d>68</d>
<d>68.050003</d>
<d>68.099998</d>
<d>68.150002</d>
<d>68.199997</d>
<d>68.25</d>
<d>68.300003</d>
<d>68.349998</d>
<d>68.400002</d>
<d>68.449997</d>
<d>68.5</d>
<d>68.550003</d>
<d>68.599998</d>
<d>68.650002</d>
<d>68.699997</d>
<d>68.75</d>
<d>68.800003</d>
<d>68.849998</d>
<d>68.900002</d>
<d>68.949997</d>
<d>69</d>
<d>69.050003</d>
<d>69.099998</d>
<d>69.150002</d>
<d>69.199997</d>
<d>69.25</d>
<d>69.300003</d>
<d>69.349998</d>
<d>69.400002</d>
<d>69.449997</d>
<d>69.5</d>
<d>69.550003</d>
<d>69.599998</d>
<d>69.650002</d>
<d>69.699997</d>
<d>69.75</d>
<d>69.800003</d>
<d>69.849998</d>
<d>69.900002</d>
<d>69.949997</d>
<d>70</d>
<d>70.050003</d>
<d>70.099998</d>
<d>70.150002</d>
<d>70.199997</d>
<d>70.25</d>
<d>70.300003</d>
<d>70.349998</d>
<d>70.400002</d>
<d>70.449997</d>
<d>70.5</d>
<d>70.550003</d>
<d>70.599998</d>
<d>70.650002</d>
<d>70.699997</d>
<d>70.75</d>
<d>70.800003</d>
<d>70.849998</d>
<d>70.900002</d>
<d>70.949997</d>
<d>71</d>
<d>71.050003</d>
<d>71.099998</d>
<d>71.150002</d>
<d>71.199997</d>
<d>71.25</d>
<d>71.300003</d>
<d>71.349998</d>
<d>71.400002</d>
<d>71.449997</d>
<d>71.5</d>
<d>71.550003</d>
<d>71.599998</d>
<d>71.650002</d>
<d>71.699997</d>
<d>71.75</d>
<d>71.800003</d>
<d>71.849998</d>
<d>71.900002</d>
<d>71.949997</d>
<d>72</d>
<d>72.050003</d>
<d>72.099998</d>
<d>72.150002</d>
<d>72.199997</d>
<d>72.25</d>
<d>72.300003</d>
<d>72.349998</d>
<d>72.400002</d>
<d>72.449997</d>
<d>72.5</d>
<d>72.550003</d>
<d>72.599998</d>
<d>72.650002</d>
<d>72.699997</d>
<d>72.75</d>
<d>72.800003</d>
<d>72.849998</d>
<d>72.900002</d>
<d>72.949997</d>
<d>73</d>
<d>73.050003</d>
<d>73.099998</d>
<d>73.150002</d>
<d>73.199997</d>
<d>73.25</d>
<d>73.300003</d>
<d>73.349998</d>
<d>73.400002</d>
<d>73.449997</d>
<d>73.5</d>
<d>73.550003</d>
<d>73.599998</d>
<d>73.650002</d>
<d>73.699997</d>
<d>73.75</d>
<d>73.800003</d>
<d>73.849998</d>
<d>73.900002</d>
<d>73.949997</d>
<d>74</d>
<d>74.050003</d>
<d>74.099998</d>
<d>74.150002</d>
<d>74.199997</d>
<d>74.25</d>
<d>74.300003</d>
<d>74.349998</d>
<d>74.400002</d>
<d>74.449997</d>
<d>74.5</d>
<d>74.550003</d>
<d>74.599998</d>
<d>74.650002</d>
<d>74.699997</d>
<d>74.75</d>
<d>74.800003</d>
<d>74.849998</d>
<d>74.900002</d>
<d>74.949997</d>
<d>75</d>
<d>75.050003</d>
<d>75.099998</d>
<d>75.150002</d>
<d>75.199997</d>
<d>75.25</d>
<d>75.300003</d>
<d>75.349998</d>
<d>75.400002</d>
<d>75.449997</d>
<d>75.5</d>
<d>75.550003</d>
<d>75.599998</d>
<d>75.650002</d>
<d>75.699997</d>
<d>75.75</d>
<d>75.800003</d>
<d>75.849998</d>
<d>75.900002</d>
<d>75.949997</d>
<d>76</d>
<d>76.050003</d>
<d>76.099998</d>
<d>76.150002</d>
<d>76.199997</d>
<d>76.25</d>
<d>76.300003</d>
<d>76.349998</d>
<d>76.400002</d>
<d>76.449997</d>
<d>76.5</d>
<d>76.550003</d>
<d>76.599998</d>
<d>76.650002</d>
<d>76.699997</d>
<d>76.75</d>
<d>76.800003</d>
<d>76.849998</d>
<d>76.900002</d>
<d>76.949997</d>
<d>77</d>
<d>77.050003</d>
<d>77.099998</d>
<d>77.150002</d>
<d>77.199997</d>
<d>77.25</d>
<d>77.300003</d>
<d>77.349998</d>
<d>77.400002</d>
<d>77.449997</d>
<d>77.5</d>
<d>77.550003</d>
<d>77.599998</d>
<d>77.650002</d>
<d>77.699997</d>
<d>77.75</d>
<d>77.800003</d>
<d>77.849998</d>
<d>77.900002</d>
<d>77.949997</d>
<d>78</d>
<d>78.050003</d>
<d>78.099998</d>
<d>78.150002</d>
<d>78.199997</d>
<d>78.25</d>
<d>78.300003</d>
<d>78.349998</d>
<d>78.400002</d>
<d>78.449997</d>
<d>78.5</d>
<d>78.550003</d>
<d>78.599998</d>
<d>78.650002</d>
<d>78.699997</d>
<d>78.75</d>
<d>78.800003</d>
<d>78.849998</d>
<d>78.900002</d>
<d>78.949997</d>
<d>79</d>
<d>79.050003</d>
<d>79.099998</d>
<d>79.150002</d>
<d>79.199997</d>
<d>79.25</d>
<d>79.300003</d>
<d>79.349998</d>
<d>79.400002</d>
<d>79.449997</d>
<d>79.5</d>
<d>79.550003</d>
<d>79.599998</d>
<d>79.650002</d>
<d>79.699997</d>
<d>79.75</d>
<d>79.800003</d>
<d>79.849998</d>
<d>79.900002</d>
<d>79.949997</d>
<d>80</d>
<d>80.050003</d>
<d>80.099998</d>
<d>80.150002</d>
<d>80.199997</d>
<d>80.25</d>
<d>80.300003</d>
<d>80.349998</d>
<d>80.400002</d>
<d>80.449997</d>
<d>80.5</d>
<d>80.550003</d>
<d>80.599998</d>
<d>80.650002</d>
<d>80.699997</d>
<d>80.75</d>
<d>80.800003</d>
<d>80.849998</d>
<d>80.900002</d>
<d>80.949997</d>
<d>81</d>
<d>81.050003</d>
<d>81.099998</d>
<d>81.150002</d>
<d>81.199997</d>
<d>81.25</d>
<d>81.300003</d>
<d>81.349998</d>
<d>81.400002</d>
<d>81.449997</d>
<d>81.5</d>
<d>81.550003</d>
<d>81.599998</d>
<d>81.650002</d>
<d>81.699997</d>
<d>81.75</d>
<d>81.800003</d>
<d>81.849998</d>
<d>81.900002</d>
<d>81.949997</d>
<d>82</d>
<d>82.050003</d>
<d>82.099998</d>
<d>82.150002</d>
<d>82.199997</d>
<d>82.25</d>
<d>82.300003</d>
<d>82.349998</d>
<d>82.400002</d>
<d>82.449997</d>
<d>82.5</d>
<d>82.550003</d>
<d>82.599998</d>
<d>82.650002</d>
<d>82.699997</d>
<d>82.75</d>
<d>82.800003</d>
<d>82.849998</d>
<d>82.900002</d>
<d>82.949997</d>
<d>83</d>
<d>83.050003</d>
<d>83.099998</d>
<d>83.150002</d>
<d>83.199997</d>
<d>83.25</d>
<d>83.300003</d>
<d>83.349998</d>
<d>83.400002</d>
<d>83.449997</d>
<d>83.5</d>
<d>83.550003</d>
<d>83.599998</d>
<d>83.650002</d>
<d>83.699997</d>
<d>83.75</d>
<d>83.800003</d>
<d>83.849998</d>
<d>83.900002</d>
<d>83.949997</d>
<d>84</d>
<d>84.050003</d>
<d>84.099998</d>
<d>84.150002</d>
<d>84.199997</d>
<d>84.25</d>
<d>84.300003</d>
<d>84.349998</d>
<d>84.400002</d>
<d>84.449997</d>
<d>84.5</d>
<d>84.550003</d>
<d>84.599998</d>
<d>84.650002</d>
<d>84.699997</d>
<d>84.75</d>
<d>84.800003</d>
<d>84.849998</d>
<d>84.900002</d>
<d>84.949997</d>
<d>85</d>
<d>85.050003</d>
<d>85.099998</d>
<d>85.150002</d>
<d>85.199997</d>
<d>85.25</d>
<d>85.300003</d>
<d>85.349998</d>
<d>85.400002</d>
<d>85.449997</d>
<d>85.5</d>
<d>85.550003</d>
<d>85.599998</d>
<d>85.650002</d>
<d>85.699997</d>
<d>85.75</d>
<d>85.800003</d>
<d>85.849998</d>
<d>85.900002</d>
<d>85.949997</d>
<d>86</d>
<d>86.050003</d>
<d>86.099998</d>
<d>86.150002</d>
<d>86.199997</d>
<d>86.25</d>
<d>86.300003</d>
<d>86.349998</d>
<d>86.400002</d>
<d>86.449997</d>
<d>86.5</d>
<d>86.550003</d>
<d>86.599998</d>
<d>86.650002</d>
<d>86.699997</d>
<d>86.75</d>
<d>86.800003</d>
<d>86.849998</d>
<d>86.900002</d>
<d>86.949997</d>
<d>87</d>
<d>87.050003</d>
<d>87.099998</d>
<d>87.150002</d>
<d>87.199997</d>
<d>87.25</d>
<d>87.300003</d>
<d>87.349998</d>
<d>87.400002</d>
<d>87.449997</d>
<d>87.5</d>
<d>87.550003</d>
<d>87.599998</d>
<d>87.650002</d>
<d>87.699997</d>
<d>87.75</d>
<d>87.800003</d>
<d>87.849998</d>
<d>87.900002</d>
<d>87.949997</d>
<d>88</d>
<d>88.050003</d>
<d>88.099998</d>
<d>88.150002</d>
<d>88.199997</d>
<d>88.25</d>
<d>88.300003</d>
<d>88.349998</d>
<d>88.400002</d>
<d>88.449997</d>
<d>88.5</d>
<d>88.550003</d>
<d>88.599998</d>
<d>88.650002</d>
<d>88.699997</d>
<d>88.75</d>
<d>88.800003</d>
<d>88.849998</d>
<d>88.900002</d>
<d>88.949997</d>
<d>89</d>
<d>89.050003</d>
<d>89.099998</d>
<d>89.150002</d>
<d>89.199997</d>
<d>89.25</d>
<d>89.300003</d>
<d>89.349998</d>
<d>89.400002</d>
<d>89.449997</d>
<d>89.5</d>
<d>89.550003</d>
<d>89.599998</d>
<d>89.650002</d>
<d>89.699997</d>
<d>89.75</d>
<d>89.800003</d>
<d>89.849998</d>
<d>89.900002</d>
<d>89.949997</d>
<d>90</d>
<d>90.050003</d>
<d>90.099998</d>
<d>90.150002</d>
<d>90.199997</d>
<d>90.25</d>
<d>90.300003</d>
<d>90.349998</d>
<d>90.400002</d>
<d>90.449997</d>
<d>90.5</d>
<d>90.550003</d>
<d>90.599998</d>
<d>90.650002</d>
<d>90.699997</d>
<d>90.75</d>
<d>90.800003</d>
<d>90.849998</d>
<d>90.900002</d>
<d>90.949997</d>
<d>91</d>
<d>91.050003</d>
<d>91.099998</d>
<d>91.150002</d>
<d>91.199997</d>
<d>91.25</d>
<d>91.300003</d>
<d>91.349998</d>
<d>91.400002</d>
<d>91.449997</d>
<d>91.5</d>
<d>91.550003</d>
<d>91.599998</d>
<d>91.650002</d>
<d>91.699997</d>
<d>91.75</d>
<d>91.800003</d>
<d>91.849998</d>
<d>91.900002</d>
<d>91.949997</d>
<d>92</d>
<d>92.050003</d>
<d>92.099998</d>
<d>92.150002</d>
<d>92.199997</d>
<d>92.25</d>
<d>92.300003</d>
<d>92.349998</d>
<d>92.400002</d>
<d>92.449997</d>
<d>92.5</d>
<d>92.550003</d>
<d>92.599998</d>
<d>92.650002</d>
<d>92.699997</d>
<d>92.75</d>
<d>92.800003</d>
<d>92.849998</d>
<d>92.900002</d>
<d>92.949997</d>
<d>93</d>
<d>93.050003</d>
<d>93.099998</d>
<d>93.150002</d>
<d>93.199997</d>
<d>93.25</d>
<d>93.300003</d>
<d>93.349998</d>
<d>93.400002</d>
<d>93.449997</d>
<d>93.5</d>
<d>93.550003</d>
<d>93.599998</d>
<d>93.650002</d>
<d>93.699997</d>
<d>93.75</d>
<d>93.800003</d>
<d>93.849998</d>
<d>93.900002</d>
<d>93.949997</d>
<d>94</d>
<d>94.050003</d>
<d>94.099998</d>
<d>94.150002</d>
<d>94.199997</d>
<d>94.25</d>
<d>94.300003</d>
<d>94.349998</d>
<d>94.400002</d>
<d>94.449997</d>
<d>94.5</d>
<d>94.550003</d>
<d>94.599998</d>
<d>94.650002</d>
<d>94.699997</d>
<d>94.75</d>
<d>94.800003</d>
<d>94.849998</d>
<d>94.900002</d>
<d>94.949997</d>
<d>95</d>
<d>95.050003</d>
<d>95.099998</d>
<d>95.150002</d>
<d>95.199997</d>
<d>95.25</d>
<d>95.300003</d>
<d>95.349998</d>
<d>95.400002</d>
<d>95.449997</d>
<d>95.5</d>
<d>95.550003</d>
<d>95.599998</d>
<d>95.650002</d>
<d>95.699997</d>
<d>95.75</d>
<d>95.800003</d>
<d>95.849998</d>
<d>95.900002</d>
<d>95.949997</d>
<d>96</d>
<d>96.050003</d>
<d>96.099998</d>
<d>96.150002</d>
<d>96.199997</d>
<d>96.25</d>
<d>96.300003</d>
<d>96.349998</d>
<d>96.400002</d>
<d>96.449997</d>
<d>96.5</d>
<d>96.550003</d>
<d>96.599998</d>
<d>96.650002</d>
<d>96.699997</d>
<d>96.75</d>
<d>96.800003</d>
<d>96.849998</d>
<d>96.900002</d>
<d>96.949997</d>
<d>97</d>
<d>97.050003</d>
<d>97.099998</d>
<d>97.150002</d>
<d>97.199997</d>
<d>97.25</d>
<d>97.300003</d>
<d>97.349998</d>
<d>97.400002</d>
<d>97.449997</d>
<d>97.5</d>
<d>97.550003</d>
<d>97.599998</d>
<d>97.650002</d>
<d>97.699997</d>
<d>97.75</d>
<d>97.800003</d>
<d>97.849998</d>
<d>97.900002</d>
<d>97.949997</d>
<d>98</d>
<d>98.050003</d>
<d>98.099998</d>
<d>98.150002</d>
<d>98.199997</d>
<d>98.25</d>
<d>98.300003</d>
<d>98.349998</d>
<d>98.400002</d>
<d>98.449997</d>
<d>98.5</d>
<d>98.550003</d>
<d>98.599998</d>
<d>98.650002</d>
<d>98.699997</d>
<d>98.75</d>
<d>98.800003</d>
<d>98.849998</d>
<d>98.900002</d>
<d>98.949997</d>
<d>99</d>
<d>99.050003</d>
<d>99.099998</d>
<d>99.150002</d>
<d>99.199997</d>
<d>99.25</d>
<d>99.300003</d>
<d>99.349998</d>
<d>99.400002</d>
<d>99.449997</d>
<d>99.5</d>
<d>99.550003</d>
<d>99.599998</d>
<d>99.650002</d>
<d>99.699997</d>
<d>99.75</d>
<d>99.800003</d>
<d>99.849998</d>
<d>99.900002</d>
<d>99.949997</d>
<d>50</d>
<d>50.025</d>
<d>50.05</d>
<d>50.075</d>
<d>50.1</d>
<d>50.125</d>
<d>50.15</d>
<d>50.175</d>
<d>50.2</d>
<d>50.225</d>
<d>50.25</d>
<d>50.275</d>
<d>50.3</d>
<d>50.325</d>
<d>50.35</d>
<d>50.375</d>
<d>50.4</d>
<d>50.425</d>
<d>50.45</d>
<d>50.475</d>
<d>50.5</d>
<d>50.525</d>
<d>50.55</d>
<d>50.575</d>
<d>50.6</d>
<d>50.625</d>
<d>50.65</d>
<d>50.675</d>
<d>50.7</d>
<d>50.725</d>
<d>50.75</d>
<d>50.775</d>
<d>50.8</d>
<d>50.825</d>
<d>50.85</d>
<d>50.875</d>
<d>50.9</d>
<d>50.925</d>
<d>50.95</d>
<d>50.975</d>
<d>51</d>
<d>51.025</d>
<d>51.05</d>
<d>51.075</d>
<d>51.1</d>
<d>51.125</d>
<d>51.15</d>
<d>51.175</d>
<d>51.2</d>
<d>51.225</d>
<d>51.25</d>
<d>51.275</d>
<d>51.3</d>
<d>51.325</d>
<d>51.35</d>
<d>51.375</d>
<d>51.4</d>
<d>51.425</d>
<d>51.45</d>
<d>51.475</d>
<d>51.5</d>
<d>51.525</d>
<d>51.55</d>
<d>51.575</d>
<d>51.6</d>
<d>51.625</d>
<d>51.65</d>
<d>51.675</d>
<d>51.7</d>
<d>51.725</d>
<d>51.75</d>
<d>51.775</d>
<d>51.8</d>
<d>51.825</d>
<d>51.85</d>
<d>51.875</d>
<d>51.9</d>
<d>51.925</d>
<d>51.95</d>
<d>51.975</d>
<d>52</d>
<d>52.025</d>
<d>52.05</d>
<d>52.075</d>
<d>52.1</d>
<d>52.125</d>
<d>52.15</d>
<d>52.175</d>
<d>52.2</d>
<d>52.225</d>
<d>52.25</d>
<d>52.275</d>
<d>52.3</d>
<d>52.325</d>
<d>52.35</d>
<d>52.375</d>
<d>52.4</d>
<d>52.425</d>
<d>52.45</d>
<d>52.475</d>
<d>52.5</d>
<d>52.525</d>
<d>52.55</d>
<d>52.575</d>
<d>52.6</d>
<d>52.625</d>
<d>52.65</d>
<d>52.675</d>
<d>52.7</d>
<d>52.725</d>
<d>52.75</d>
<d>52.775</d>
<d>52.8</d>
<d>52.825</d>
<d>52.85</d>
<d>52.875</d>
<d>52.9</d>
<d>52.925</d>
<d>52.95</d>
<d>52.975</d>
<d>53</d>
<d>53.025</d>
<d>53.05</d>
<d>53.075</d>
<d>53.1</d>
<d>53.125</d>
<d>53.15</d>
<d>53.175</d>
<d>53.2</d>
<d>53.225</d>
<d>53.25</d>
<d>53.275</d>
<d>53.3</d>
<d>53.325</d>
<d>53.35</d>
<d>53.375</d>
<d>53.4</d>
<d>53.425</d>
<d>53.45</d>
<d>53.475</d>
<d>53.5</d>
<d>53.525</d>
<d>53.55</d>
<d>53.575</d>
<d>53.6</d>
<d>53.625</d>
<d>53.65</d>
<d>53.675</d>
<d>53.7</d>
<d>53.725</d>
<d>53.75</d>
<d>53.775</d>
<d>53.8</d>
<d>53.825</d>
<d>53.85</d>
<d>53.875</d>
<d>53.9</d>
<d>53.925</d>
<d>53.95</d>
<d>53.975</d>
<d>54</d>
<d>54.025</d>
<d>54.05</d>
<d>54.075</d>
<d>54.1</d>
<d>54.125</d>
<d>54.15</d>
<d>54.175</d>
<d>54.2</d>
<d>54.225</d>
<d>54.25</d>
<d>54.275</d>
<d>54.3</d>
<d>54.325</d>
<d>54.35</d>
<d>54.375</d>
<d>54.4</d>
<d>54.425</d>
<d>54.45</d>
<d>54.475</d>
<d>54.5</d>
<d>54.525</d>
<d>54.55</d>
<d>54.575</d>
<d>54.6</d>
<d>54.625</d>
<d>54.65</d>
<d>54.675</d>
<d>54.7</d>
<d>54.725</d>
<d>54.75</d>
<d>54.775</d>
<d>54.8</d>
<d>54.825</d>
<d>54.85</d>
<d>54.875</d>
<d>54.9</d>
<d>54.925</d>
<d>54.95</d>
<d>54.975</d>
<d>55</d>
<d>55.025</d>
<d>55.05</d>
<d>55.075</d>
<d>55.1</d>
<d>55.125</d>
<d>55.15</d>
<d>55.175</d>
<d>55.2</d>
<d>55.225</d>
<d>55.25</d>
<d>55.275</d>
<d>55.3</d>
<d>55.325</d>
<d>55.35</d>
<d>55.375</d>
<d>55.4</d>
<d>55.425</d>
<d>55.45</d>
<d>55.475</d>
<d>55.5</d>
<d>55.525</d>
<d>55.55</d>
<d>55.575</d>
<d>55.6</d>
<d>55.625</d>
<d>55.65</d>
<d>55.675</d>
<d>55.7</d>
<d>55.725</d>
<d>55.75</d>
<d>55.775</d>
<d>55.8</d>
<d>55.825</d>
<d>55.85</d>
<d>55.875</d>
<d>55.9</d>
<d>55.925</d>
<d>55.95</d>
<d>55.975</d>
<d>56</d>
<d>56.025</d>
<d>56.05</d>
<d>56.075</d>
<d>56.1</d>
<d>56.125</d>
<d>56.15</d>
<d>56.175</d>
<d>56.2</d>
<d>56.225</d>
<d>56.25</d>
<d>56.275</d>
<d>56.3</d>
<d>56.325</d>
<d>56.35</d>
<d>56.375</d>
<d>56.4</d>
<d>56.425</d>
<d>56.45</d>
<d>56.475</d>
<d>56.5</d>
<d>56.525</d>
<d>56.55</d>
<d>56.575</d>
<d>56.6</d>
<d>56.625</d>
<d>56.65</d>
<d>56.675</d>
<d>56.7</d>
<d>56.725</d>
<d>56.75</d>
<d>56.775</d>
<d>56.8</d>
<d>56.825</d>
<d>56.85</d>
<d>56.875</d>
<d>56.9</d>
<d>56.925</d>
<d>56.95</d>
<d>56.975</d>
<d>57</d>
<d>57.025</d>
<d>57.05</d>
<d>57.075</d>
<d>57.1</d>
<d>57.125</d>
<d>57.15</d>
<d>57.175</d>
<d>57.2</d>
<d>57.225</d>
<d>57.25</d>
<d>57.275</d>
<d>57.3</d>
<d>57.325</d>
<d>57.35</d>
<d>57.375</d>
<d>57.4</d>
<d>57.425</d>
<d>57.45</d>
<d>57.475</d>
<d>57.5</d>
<d>57.525</d>
<d>57.55</d>
<d>57.575</d>
<d>57.6</d>
<d>57.625</d>
<d>57.65</d>
<d>57.675</d>
<d>57.7</d>
<d>57.725</d>
<d>57.75</d>
<d>57.775</d>
<d>57.8</d>
<d>57.825</d>
<d>57.85</d>
<d>57.875</d>
<d>57.9</d>
<d>57.925</d>
<d>57.95</d>
<d>57.975</d>
<d>58</d>
<d>58.025</d>
<d>58.05</d>
<d>58.075</d>
<d>58.1</d>
<d>58.125</d>
<d>58.15</d>
<d>58.175</d>
<d>58.2</d>
<d>58.225</d>
<d>58.25</d>
<d>58.275</d>
<d>58.3</d>
<d>58.325</d>
<d>58.35</d>
<d>58.375</d>
<d>58.4</d>
<d>58.425</d>
<d>58.45</d>
<d>58.475</d>
<d>58.5</d>
<d>58.525</d>
<d>58.55</d>
<d>58.575</d>
<d>58.6</d>
<d>58.625</d>
<d>58.65</d>
<d>58.675</d>
<d>58.7</d>
<d>58.725</d>
<d>58.75</d>
<d>58.775</d>
<d>58.8</d>
<d>58.825</d>
<d>58.85</d>
<d>58.875</d>
<d>58.9</d>
<d>58.925</d>
<d>58.95</d>
<d>58.975</d>
<d>59</d>
<d>59.025</d>
<d>59.05</d>
<d>59.075</d>
<d>59.1</d>
<d>59.125</d>
<d>59.15</d>
<d>59.175</d>
<d>59.2</d>
<d>59.225</d>
<d>59.25</d>
<d>59.275</d>
<d>59.3</d>
<d>59.325</d>
<d>59.35</d>
<d>59.375</d>
<d>59.4</d>
<d>59.425</d>
<d>59.45</d>
<d>59.475</d>
<d>59.5</d>
<d>59.525</d>
<d>59.55</d>
<d>59.575</d>
<d>59.6</d>
<d>59.625</d>
<d>59.65</d>
<d>59.675</d>
<d>59.7</d>
<d>59.725</d>
<d>59.75</d>
<d>59.775</d>
<d>59.8</d>
<d>59.825</d>
<d>59.85</d>
<d>59.875</d>
<d>59.9</d>
<d>59.925</d>
<d>59.95</d>
<d>59.975</d>
<d>60</d>
<d>60.025</d>
<d>60.05</d>
<d>60.075</d>
<d>60.1</d>
<d>60.125</d>
<d>60.15</d>
<d>60.175</d>
<d>60.2</d>
<d>60.225</d>
<d>60.25</d>
<d>60.275</d>
<d>60.3</d>
<d>60.325</d>
<d>60.35</d>
<d>60.375</d>
<d>60.4</d>
<d>60.425</d>
<d>60.45</d>
<d>60.475</d>
<d>60.5</d>
<d>60.525</d>
<d>60.55</d>
<d>60.575</d>
<d>60.6</d>
<d>60.625</d>
<d>60.65</d>
<d>60.675</d>
<d>60.7</d>
<d>60.725</d>
<d>60.75</d>
<d>60.775</d>
<d>60.8</d>
<d>60.825</d>
<d>60.85</d>
<d>60.875</d>
<d>60.9</d>
<d>60.925</d>
<d>60.95</d>
<d>60.975</d>
<d>61</d>
<d>61.025</d>
<d>61.05</d>
<d>61.075</d>
<d>61.1</d>
<d>61.125</d>
<d>61.15</d>
<d>61.175</d>
<d>61.2</d>
<d>61.225</d>
<d>61.25</d>
<d>61.275</d>
<d>61.3</d>
<d>61.325</d>
<d>61.35</d>
<d>61.375</d>
<d>61.4</d>
<d>61.425</d>
<d>61.45</d>
<d>61.475</d>
<d>61.5</d>
<d>61.525</d>
<d>61.55</d>
<d>61.575</d>
<d>61.6</d>
<d>61.625</d>
<d>61.65</d>
<d>61.675</d>
<d>61.7</d>
<d>61.725</d>
<d>61.75</d>
<d>61.775</d>
<d>61.8</d>
<d>61.825</d>
<d>61.85</d>
<d>61.875</d>
<d>61.9</d>
<d>61.925</d>
<d>61.95</d>
<d>61.975</d>
<d>62</d>
<d>62.025</d>
<d>62.05</d>
<d>62.075</d>
<d>62.1</d>
<d>62.125</d>
<d>62.15</d>
<d>62.175</d>
<d>62.2</d>
<d>62.225</d>
<d>62.25</d>
<d>62.275</d>
<d>62.3</d>
<d>62.325</d>
<d>62.35</d>
<d>62.375</d>
<d>62.4</d>
<d>62.425</d>
<d>62.45</d>
<d>62.475</d>
<d>62.5</d>
<d>62.525</d>
<d>62.55</d>
<d>62.575</d>
<d>62.6</d>
<d>62.625</d>
<d>62.65</d>
<d>62.675</d>
<d>62.7</d>
<d>62.725</d>
<d>62.75</d>
<d>62.775</d>
<d>62.8</d>
<d>62.825</d>
<d>62.85</d>
<d>62.875</d>
<d>62.9</d>
<d>62.925</d>
<d>62.95</d>
<d>62.975</d>
<d>63</d>
<d>63.025</d>
<d>63.05</d>
<d>63.075</d>
<d>63.1</d>
<d>63.125</d>
<d>63.15</d>
<d>63.175</d>
<d>63.2</d>
<d>63.225</d>
<d>63.25</d>
<d>63.275</d>
<d>63.3</d>
<d>63.325</d>
<d>63.35</d>
<d>63.375</d>
<d>63.4</d>
<d>63.425</d>
<d>63.45</d>
<d>63.475</d>
<d>63.5</d>
<d>63.525</d>
<d>63.55</d>
<d>63.575</d>
<d>63.6</d>
<d>63.625</d>
<d>63.65</d>
<d>63.675</d>
<d>63.7</d>
<d>63.725</d>
<d>63.75</d>
<d>63.775</d>
<d>63.8</d>
<d>63.825</d>
<d>63.85</d>
<d>63.875</d>
<d>63.9</d>
<d>63.925</d>
<d>63.95</d>
<d>63.975</d>
<d>64</d>
<d>64.025</d>
<d>64.05</d>
<d>64.075</d>
<d>64.1</d>
<d>64.125</d>
<d>64.15</d>
<d>64.175</d>
<d>64.2</d>
<d>64.225</d>
<d>64.25</d>
<d>64.275</d>
<d>64.3</d>
<d>64.325</d>
<d>64.35</d>
<d>64.375</d>
<d>64.4</d>
<d>64.425</d>
<d>64.45</d>
<d>64.475</d>
<d>64.5</d>
<d>64.525</d>
<d>64.55</d>
<d>64.575</d>
<d>64.6</d>
<d>64.625</d>
<d>64.65</d>
<d>64.675</d>
<d>64.7</d>
<d>64.725</d>
<d>64.75</d>
<d>64.775</d>
<d>64.8</d>
<d>64.825</d>
<d>64.85</d>
<d>64.875</d>
<d>64.9</d>
<d>64.925</d>
<d>64.95</d>
<d>64.975</d>
<d>65</d>
<d>65.025</d>
<d>65.05</d>
<d>65.075</d>
<d>65.1</d>
<d>65.125</d>
<d>65.15</d>
<d>65.175</d>
<d>65.2</d>
<d>65.225</d>
<d>65.25</d>
<d>65.275</d>
<d>65.3</d>
<d>65.325</d>
<d>65.35</d>
<d>65.375</d>
<d>65.4</d>
<d>65.425</d>
<d>65.45</d>
<d>65.475</d>
<d>65.5</d>
<d>65.525</d>
<d>65.55</d>
<d>65.575</d>
<d>65.6</d>
<d>65.625</d>
<d>65.65</d>
<d>65.675</d>
<d>65.7</d>
<d>65.725</d>
<d>65.75</d>
<d>65.775</d>
<d>65.8</d>
<d>65.825</d>
<d>65.85</d>
<d>65.875</d>
<d>65.9</d>
<d>65.925</d>
<d>65.95</d>
<d>65.975</d>
<d>66</d>
<d>66.025</d>
<d>66.05</d>
<d>66.075</d>
<d>66.1</d>
<d>66.125</d>
<d>66.15</d>
<d>66.175</d>
<d>66.2</d>
<d>66.225</d>
<d>66.25</d>
<d>66.275</d>
<d>66.3</d>
<d>66.325</d>
<d>66.35</d>
<d>66.375</d>
<d>66.4</d>
<d>66.425</d>
<d>66.45</d>
<d>66.475</d>
<d>66.5</d>
<d>66.525</d>
<d>66.55</d>
<d>66.575</d>
<d>66.6</d>
<d>66.625</d>
<d>66.65</d>
<d>66.675</d>
<d>66.7</d>
<d>66.725</d>
<d>66.75</d>
<d>66.775</d>
<d>66.8</d>
<d>66.825</d>
<d>66.85</d>
<d>66.875</d>
<d>66.9</d>
<d>66.925</d>
<d>66.95</d>
<d>66.975</d>
<d>67</d>
<d>67.025</d>
<d>67.05</d>
<d>67.075</d>
<d>67.1</d>
<d>67.125</d>
<d>67.15</d>
<d>67.175</d>
<d>67.2</d>
<d>67.225</d>
<d>67.25</d>
<d>67.275</d>
<d>67.3</d>
<d>67.325</d>
<d>67.35</d>
<d>67.375</d>
<d>67.4</d>
<d>67.425</d>
<d>67.45</d>
<d>67.475</d>
<d>67.5</d>
<d>67.525</d>
<d>67.55</d>
<d>67.575</d>
<d>67.6</d>
<d>67.625</d>
<d>67.65</d>
<d>67.675</d>
<d>67.7</d>
<d>67.725</d>
<d>67.75</d>
<d>67.775</d>
<d>67.8</d>
<d>67.825</d>
<d>67.85</d>
<d>67.875</d>
<d>67.9</d>
<d>67.925</d>
<d>67.95</d>
<d>67.975</d>
<d>68</d>
<d>68.025</d>
<d>68.05</d>
<d>68.075</d>
<d>68.1</d>
<d>68.125</d>
<d>68.15</d>
<d>68.175</d>
<d>68.2</d>
<d>68.225</d>
<d>68.25</d>
<d>68.275</d>
<d>68.3</d>
<d>68.325</d>
<d>68.35</d>
<d>68.375</d>
<d>68.4</d>
<d>68.425</d>
<d>68.45</d>
<d>68.475</d>
<d>68.5</d>
<d>68.525</d>
<d>68.55</d>
<d>68.575</d>
<d>68.6</d>
<d>68.625</d>
<d>68.65</d>
<d>68.675</d>
<d>68.7</d>
<d>68.725</d>
<d>68.75</d>
<d>68.775</d>
<d>68.8</d>
<d>68.825</d>
<d>68.85</d>
<d>68.875</d>
<d>68.9</d>
<d>68.925</d>
<d>68.95</d>
<d>68.975</d>
<d>69</d>
<d>69.025</d>
<d>69.05</d>
<d>69.075</d>
<d>69.1</d>
<d>69.125</d>
<d>69.15</d>
<d>69.175</d>
<d>69.2</d>
<d>69.225</d>
<d>69.25</d>
<d>69.275</d>
<d>69.3</d>
<d>69.325</d>
<d>69.35</d>
<d>69.375</d>
<d>69.4</d>
<d>69.425</d>
<d>69.45</d>
<d>69.475</d>
<d>69.5</d>
<d>69.525</d>
<d>69.55</d>
<d>69.575</d>
<d>69.6</d>
<d>69.625</d>
<d>69.65</d>
<d>69.675</d>
<d>69.7</d>
<d>69.725</d>
<d>69.75</d>
<d>69.775</d>
<d>69.8</d>
<d>69.825</d>
<d>69.85</d>
<d>69.875</d>
<d>69.9</d>
<d>69.925</d>
<d>69.95</d>
<d>69.975</d>
<d>70</d>
<d>70.025</d>
<d>70.05</d>
<d>70.075</d>
<d>70.1</d>
<d>70.125</d>
<d>70.15</d>
<d>70.175</d>
<d>70.2</d>
<d>70.225</d>
<d>70.25</d>
<d>70.275</d>
<d>70.3</d>
<d>70.325</d>
<d>70.35</d>
<d>70.375</d>
<d>70.4</d>
<d>70.425</d>
<d>70.45</d>
<d>70.475</d>
<d>70.5</d>
<d>70.525</d>
<d>70.55</d>
<d>70.575</d>
<d>70.6</d>
<d>70.625</d>
<d>70.65</d>
<d>70.675</d>
<d>70.7</d>
<d>70.725</d>
<d>70.75</d>
<d>70.775</d>
<d>70.8</d>
<d>70.825</d>
<d>70.85</d>
<d>70.875</d>
<d>70.9</d>
<d>70.925</d>
<d>70.95</d>
<d>70.975</d>
<d>71</d>
<d>71.025</d>
<d>71.05</d>
<d>71.075</d>
<d>71.1</d>
<d>71.125</d>
<d>71.15</d>
<d>71.175</d>
<d>71.2</d>
<d>71.225</d>
<d>71.25</d>
<d>71.275</d>
<d>71.3</d>
<d>71.325</d>
<d>71.35</d>
<d>71.375</d>
<d>71.4</d>
<d>71.425</d>
<d>71.45</d>
<d>71.475</d>
<d>71.5</d>
<d>71.525</d>
<d>71.55</d>
<d>71.575</d>
<d>71.6</d>
<d>71.625</d>
<d>71.65</d>
<d>71.675</d>
<d>71.7</d>
<d>71.725</d>
<d>71.75</d>
<d>71.775</d>
<d>71.8</d>
<d>71.825</d>
<d>71.85</d>
<d>71.875</d>
<d>71.9</d>
<d>71.925</d>
<d>71.95</d>
<d>71.975</d>
<d>72</d>
<d>72.025</d>
<d>72.05</d>
<d>72.075</d>
<d>72.1</d>
<d>72.125</d>
<d>72.15</d>
<d>72.175</d>
<d>72.2</d>
<d>72.225</d>
<d>72.25</d>
<d>72.275</d>
<d>72.3</d>
<d>72.325</d>
<d>72.35</d>
<d>72.375</d>
<d>72.4</d>
<d>72.425</d>
<d>72.45</d>
<d>72.475</d>
<d>72.5</d>
<d>72.525</d>
<d>72.55</d>
<d>72.575</d>
<d>72.6</d>
<d>72.625</d>
<d>72.65</d>
<d>72.675</d>
<d>72.7</d>
<d>72.725</d>
<d>72.75</d>
<d>72.775</d>
<d>72.8</d>
<d>72.825</d>
<d>72.85</d>
<d>72.875</d>
<d>72.9</d>
<d>72.925</d>
<d>72.95</d>
<d>72.975</d>
<d>73</d>
<d>73.025</d>
<d>73.05</d>
<d>73.075</d>
<d>73.1</d>
<d>73.125</d>
<d>73.15</d>
<d>73.175</d>
<d>73.2</d>
<d>73.225</d>
<d>73.25</d>
<d>73.275</d>
<d>73.3</d>
<d>73.325</d>
<d>73.35</d>
<d>73.375</d>
<d>73.4</d>
<d>73.425</d>
<d>73.45</d>
<d>73.475</d>
<d>73.5</d>
<d>73.525</d>
<d>73.55</d>
<d>73.575</d>
<d>73.6</d>
<d>73.625</d>
<d>73.65</d>
<d>73.675</d>
<d>73.7</d>
<d>73.725</d>
<d>73.75</d>
<d>73.775</d>
<d>73.8</d>
<d>73.825</d>
<d>73.85</d>
<d>73.875</d>
<d>73.9</d>
<d>73.925</d>
<d>73.95</d>
<d>73.975</d>
<d>74</d>
<d>74.025</d>
<d>74.05</d>
<d>74.075</d>
<d>74.1</d>
<d>74.125</d>
<d>74.15</d>
<d>74.175</d>
<d>74.2</d>
<d>74.225</d>
<d>74.25</d>
<d>74.275</d>
<d>74.3</d>
<d>74.325</d>
<d>74.35</d>
<d>74.375</d>
<d>74.4</d>
<d>74.425</d>
<d>74.45</d>
<d>74.475</d>
<d>74.5</d>
<d>74.525</d>
<d>74.55</d>
<d>74.575</d>
<d>74.6</d>
<d>74.625</d>
<d>74.65</d>
<d>74.675</d>
<d>74.7</d>
<d>74.725</d>
<d>74.75</d>
<d>74.775</d>
<d>74.8</d>
<d>74.825</d>
<d>74.85</d>
<d>74.875</d>
<d>74.9</d>
<d>74.925</d>
<d>74.95</d>
<d>74.975</d>
<d>75</d>
<d>75.025</d>
<d>75.05</d>
<d>75.075</d>
<d>75.1</d>
<d>75.125</d>
<d>75.15</d>
<d>75.175</d>
<d>75.2</d>
<d>75.225</d>
<d>75.25</d>
<d>75.275</d>
<d>75.3</d>
<d>75.325</d>
<d>75.35</d>
<d>75.375</d>
<d>75.4</d>
<d>75.425</d>
<d>75.45</d>
<d>75.475</d>
<d>75.5</d>
<d>75.525</d>
<d>75.55</d>
<d>75.575</d>
<d>75.6</d>
<d>75.625</d>
<d>75.65</d>
<d>75.675</d>
<d>75.7</d>
<d>75.725</d>
<d>75.75</d>
<d>75.775</d>
<d>75.8</d>
<d>75.825</d>
<d>75.85</d>
<d>75.875</d>
<d>75.9</d>
<d>75.925</d>
<d>75.95</d>
<d>75.975</d>
<d>76</d>
<d>76.025</d>
<d>76.05</d>
<d>76.075</d>
<d>76.1</d>
<d>76.125</d>
<d>76.15</d>
<d>76.175</d>
<d>76.2</d>
<d>76.225</d>
<d>76.25</d>
<d>76.275</d>
<d>76.3</d>
<d>76.325</d>
<d>76.35</d>
<d>76.375</d>
<d>76.4</d>
<d>76.425</d>
<d>76.45</d>
<d>76.475</d>
<d>76.5</d>
<d>76.525</d>
<d>76.55</d>
<d>76.575</d>
<d>76.6</d>
<d>76.625</d>
<d>76.65</d>
<d>76.675</d>
<d>76.7</d>
<d>76.725</d>
<d>76.75</d>
<d>76.775</d>
<d>76.8</d>
<d>76.825</d>
<d>76.85</d>
<d>76.875</d>
<d>76.9</d>
<d>76.925</d>
<d>76.95</d>
<d>76.975</d>
<d>77</d>
<d>77.025</d>
<d>77.05</d>
<d>77.075</d>
<d>77.1</d>
<d>77.125</d>
<d>77.15</d>
<d>77.175</d>
<d>77.2</d>
<d>77.225</d>
<d>77.25</d>
<d>77.275</d>
<d>77.3</d>
<d>77.325</d>
<d>77.35</d>
<d>77.375</d>
<d>77.4</d>
<d>77.425</d>
<d>77.45</d>
<d>77.475</d>
<d>77.5</d>
<d>77.525</d>
<d>77.55</d>
<d>77.575</d>
<d>77.6</d>
<d>77.625</d>
<d>77.65</d>
<d>77.675</d>
<d>77.7</d>
<d>77.725</d>
<d>77.75</d>
<d>77.775</d>
<d>77.8</d>
<d>77.825</d>
<d>77.85</d>
<d>77.875</d>
<d>77.9</d>
<d>77.925</d>
<d>77.95</d>
<d>77.975</d>
<d>78</d>
<d>78.025</d>
<d>78.05</d>
<d>78.075</d>
<d>78.1</d>
<d>78.125</d>
<d>78.15</d>
<d>78.175</d>
<d>78.2</d>
<d>78.225</d>
<d>78.25</d>
<d>78.275</d>
<d>78.3</d>
<d>78.325</d>
<d>78.35</d>
<d>78.375</d>
<d>78.4</d>
<d>78.425</d>
<d>78.45</d>
<d>78.475</d>
<d>78.5</d>
<d>78.525</d>
<d>78.55</d>
<d>78.575</d>
<d>78.6</d>
<d>78.625</d>
<d>78.65</d>
<d>78.675</d>
<d>78.7</d>
<d>78.725</d>
<d>78.75</d>
<d>78.775</d>
<d>78.8</d>
<d>78.825</d>
<d>78.85</d>
<d>78.875</d>
<d>78.9</d>
<d>78.925</d>
<d>78.95</d>
<d>78.975</d>
<d>79</d>
<d>79.025</d>
<d>79.05</d>
<d>79.075</d>
<d>79.1</d>
<d>79.125</d>
<d>79.15</d>
<d>79.175</d>
<d>79.2</d>
<d>79.225</d>
<d>79.25</d>
<d>79.275</d>
<d>79.3</d>
<d>79.325</d>
<d>79.35</d>
<d>79.375</d>
<d>79.4</d>
<d>79.425</d>
<d>79.45</d>
<d>79.475</d>
<d>79.5</d>
<d>79.525</d>
<d>79.55</d>
<d>79.575</d>
<d>79.6</d>
<d>79.625</d>
<d>79.65</d>
<d>79.675</d>
<d>79.7</d>
<d>79.725</d>
<d>79.75</d>
<d>79.775</d>
<d>79.8</d>
<d>79.825</d>
<d>79.85</d>
<d>79.875</d>
<d>79.9</d>
<d>79.925</d>
<d>79.95</d>
<d>79.975</d>
<d>80</d>
<d>80.025</d>
<d>80.05</d>
<d>80.075</d>
<d>80.1</d>
<d>80.125</d>
<d>80.15</d>
<d>80.175</d>
<d>80.2</d>
<d>80.225</d>
<d>80.25</d>
<d>80.275</d>
<d>80.3</d>
<d>80.325</d>
<d>80.35</d>
<d>80.375</d>
<d>80.4</d>
<d>80.425</d>
<d>80.45</d>
<d>80.475</d>
<d>80.5</d>
<d>80.525</d>
<d>80.55</d>
<d>80.575</d>
<d>80.6</d>
<d>80.625</d>
<d>80.65</d>
<d>80.675</d>
<d>80.7</d>
<d>80.725</d>
<d>80.75</d>
<d>80.775</d>
<d>80.8</d>
<d>80.825</d>
<d>80.85</d>
<d>80.875</d>
<d>80.9</d>
<d>80.925</d>
<d>80.95</d>
<d>80.975</d>
<d>81</d>
<d>81.025</d>
<d>81.05</d>
<d>81.075</d>
<d>81.1</d>
<d>81.125</d>
<d>81.15</d>
<d>81.175</d>
<d>81.2</d>
<d>81.225</d>
<d>81.25</d>
<d>81.275</d>
<d>81.3</d>
<d>81.325</d>
<d>81.35</d>
<d>81.375</d>
<d>81.4</d>
<d>81.425</d>
<d>81.45</d>
<d>81.475</d>
<d>81.5</d>
<d>81.525</d>
<d>81.55</d>
<d>81.575</d>
<d>81.6</d>
<d>81.625</d>
<d>81.65</d>
<d>81.675</d>
<d>81.7</d>
<d>81.725</d>
<d>81.75</d>
<d>81.775</d>
<d>81.8</d>
<d>81.825</d>
<d>81.85</d>
<d>81.875</d>
<d>81.9</d>
<d>81.925</d>
<d>81.95</d>
<d>81.975</d>
<d>82</d>
<d>82.025</d>
<d>82.05</d>
<d>82.075</d>
<d>82.1</d>
<d>82.125</d>
<d>82.15</d>
<d>82.175</d>
<d>82.2</d>
<d>82.225</d>
<d>82.25</d>
<d>82.275</d>
<d>82.3</d>
<d>82.325</d>
<d>82.35</d>
<d>82.375</d>
<d>82.4</d>
<d>82.425</d>
<d>82.45</d>
<d>82.475</d>
<d>82.5</d>
<d>82.525</d>
<d>82.55</d>
<d>82.575</d>
<d>82.6</d>
<d>82.625</d>
<d>82.65</d>
<d>82.675</d>
<d>82.7</d>
<d>82.725</d>
<d>82.75</d>
<d>82.775</d>
<d>82.8</d>
<d>82.825</d>
<d>82.85</d>
<d>82.875</d>
<d>82.9</d>
<d>82.925</d>
<d>82.95</d>
<d>82.975</d>
<d>83</d>
<d>83.025</d>
<d>83.05</d>
<d>83.075</d>
<d>83.1</d>
<d>83.125</d>
<d>83.15</d>
<d>83.175</d>
<d>83.2</d>
<d>83.225</d>
<d>83.25</d>
<d>83.275</d>
<d>83.3</d>
<d>83.325</d>
<d>83.35</d>
<d>83.375</d>
<d>83.4</d>
<d>83.425</d>
<d>83.45</d>
<d>83.475</d>
<d>83.5</d>
<d>83.525</d>
<d>83.55</d>
<d>83.575</d>
<d>83.6</d>
<d>83.625</d>
<d>83.65</d>
<d>83.675</d>
<d>83.7</d>
<d>83.725</d>
<d>83.75</d>
<d>83.775</d>
<d>83.8</d>
<d>83.825</d>
<d>83.85</d>
<d>83.875</d>
<d>83.9</d>
<d>83.925</d>
<d>83.95</d>
<d>83.975</d>
<d>84</d>
<d>84.025</d>
<d>84.05</d>
<d>84.075</d>
<d>84.1</d>
<d>84.125</d>
<d>84.15</d>
<d>84.175</d>
<d>84.2</d>
<d>84.225</d>
<d>84.25</d>
<d>84.275</d>
<d>84.3</d>
<d>84.325</d>
<d>84.35</d>
<d>84.375</d>
<d>84.4</d>
<d>84.425</d>
<d>84.45</d>
<d>84.475</d>
<d>84.5</d>
<d>84.525</d>
<d>84.55</d>
<d>84.575</d>
<d>84.6</d>
<d>84.625</d>
<d>84.65</d>
<d>84.675</d>
<d>84.7</d>
<d>84.725</d>
<d>84.75</d>
<d>84.775</d>
<d>84.8</d>
<d>84.825</d>
<d>84.85</d>
<d>84.875</d>
<d>84.9</d>
<d>84.925</d>
<d>84.95</d>
<d>84.975</d>
<d>85</d>
<d>85.025</d>
<d>85.05</d>
<d>85.075</d>
<d>85.1</d>
<d>85.125</d>
<d>85.15</d>
<d>85.175</d>
<d>85.2</d>
<d>85.225</d>
<d>85.25</d>
<d>85.275</d>
<d>85.3</d>
<d>85.325</d>
<d>85.35</d>
<d>85.375</d>
<d>85.4</d>
<d>85.425</d>
<d>85.45</d>
<d>85.475</d>
<d>85.5</d>
<d>85.525</d>
<d>85.55</d>
<d>85.575</d>
<d>85.6</d>
<d>85.625</d>
<d>85.65</d>
<d>85.675</d>
<d>85.7</d>
<d>85.725</d>
<d>85.75</d>
<d>85.775</d>
<d>85.8</d>
<d>85.825</d>
<d>85.85</d>
<d>85.875</d>
<d>85.9</d>
<d>85.925</d>
<d>85.95</d>
<d>85.975</d>
<d>86</d>
<d>86.025</d>
<d>86.05</d>
<d>86.075</d>
<d>86.1</d>
<d>86.125</d>
<d>86.15</d>
<d>86.175</d>
<d>86.2</d>
<d>86.225</d>
<d>86.25</d>
<d>86.275</d>
<d>86.3</d>
<d>86.325</d>
<d>86.35</d>
<d>86.375</d>
<d>86.4</d>
<d>86.425</d>
<d>86.45</d>
<d>86.475</d>
<d>86.5</d>
<d>86.525</d>
<d>86.55</d>
<d>86.575</d>
<d>86.6</d>
<d>86.625</d>
<d>86.65</d>
<d>86.675</d>
<d>86.7</d>
<d>86.725</d>
<d>86.75</d>
<d>86.775</d>
<d>86.8</d>
<d>86.825</d>
<d>86.85</d>
<d>86.875</d>
<d>86.9</d>
<d>86.925</d>
<d>86.95</d>
<d>86.975</d>
<d>87</d>
<d>87.025</d>
<d>87.05</d>
<d>87.075</d>
<d>87.1</d>
<d>87.125</d>
<d>87.15</d>
<d>87.175</d>
<d>87.2</d>
<d>87.225</d>
<d>87.25</d>
<d>87.275</d>
<d>87.3</d>
<d>87.325</d>
<d>87.35</d>
<d>87.375</d>
<d>87.4</d>
<d>87.425</d>
<d>87.45</d>
<d>87.475</d>
<d>87.5</d>
<d>87.525</d>
<d>87.55</d>
<d>87.575</d>
<d>87.6</d>
<d>87.625</d>
<d>87.65</d>
<d>87.675</d>
<d>87.7</d>
<d>87.725</d>
<d>87.75</d>
<d>87.775</d>
<d>87.8</d>
<d>87.825</d>
<d>87.85</d>
<d>87.875</d>
<d>87.9</d>
<d>87.925</d>
<d>87.95</d>
<d>87.975</d>
<d>88</d>
<d>88.025</d>
<d>88.05</d>
<d>88.075</d>
<d>88.1</d>
<d>88.125</d>
<d>88.15</d>
<d>88.175</d>
<d>88.2</d>
<d>88.225</d>
<d>88.25</d>
<d>88.275</d>
<d>88.3</d>
<d>88.325</d>
<d>88.35</d>
<d>88.375</d>
<d>88.4</d>
<d>88.425</d>
<d>88.45</d>
<d>88.475</d>
<d>88.5</d>
<d>88.525</d>
<d>88.55</d>
<d>88.575</d>
<d>88.6</d>
<d>88.625</d>
<d>88.65</d>
<d>88.675</d>
<d>88.7</d>
<d>88.725</d>
<d>88.75</d>
<d>88.775</d>
<d>88.8</d>
<d>88.825</d>
<d>88.85</d>
<d>88.875</d>
<d>88.9</d>
<d>88.925</d>
<d>88.95</d>
<d>88.975</d>
<d>89</d>
<d>89.025</d>
<d>89.05</d>
<d>89.075</d>
<d>89.1</d>
<d>89.125</d>
<d>89.15</d>
<d>89.175</d>
<d>89.2</d>
<d>89.225</d>
<d>89.25</d>
<d>89.275</d>
<d>89.3</d>
<d>89.325</d>
<d>89.35</d>
<d>89.375</d>
<d>89.4</d>
<d>89.425</d>
<d>89.45</d>
<d>89.475</d>
<d>89.5</d>
<d>89.525</d>
<d>89.55</d>
<d>89.575</d>
<d>89.6</d>
<d>89.625</d>
<d>89.65</d>
<d>89.675</d>
<d>89.7</d>
<d>89.725</d>
<d>89.75</d>
<d>89.775</d>
<d>89.8</d>
<d>89.825</d>
<d>89.85</d>
<d>89.875</d>
<d>89.9</d>
<d>89.925</d>
<d>89.95</d>
<d>89.975</d>
<d>90</d>
<d>90.025</d>
<d>90.05</d>
<d>90.075</d>
<d>90.1</d>
<d>90.125</d>
<d>90.15</d>
<d>90.175</d>
<d>90.2</d>
<d>90.225</d>
<d>90.25</d>
<d>90.275</d>
<d>90.3</d>
<d>90.325</d>
<d>90.35</d>
<d>90.375</d>
<d>90.4</d>
<d>90.425</d>
<d>90.45</d>
<d>90.475</d>
<d>90.5</d>
<d>90.525</d>
<d>90.55</d>
<d>90.575</d>
<d>90.6</d>
<d>90.625</d>
<d>90.65</d>
<d>90.675</d>
<d>90.7</d>
<d>90.725</d>
<d>90.75</d>
<d>90.775</d>
<d>90.8</d>
<d>90.825</d>
<d>90.85</d>
<d>90.875</d>
<d>90.9</d>
<d>90.925</d>
<d>90.95</d>
<d>90.975</d>
<d>91</d>
<d>91.025</d>
<d>91.05</d>
<d>91.075</d>
<d>91.1</d>
<d>91.125</d>
<d>91.15</d>
<d>91.175</d>
<d>91.2</d>
<d>91.225</d>
<d>91.25</d>
<d>91.275</d>
<d>91.3</d>
<d>91.325</d>
<d>91.35</d>
<d>91.375</d>
<d>91.4</d>
<d>91.425</d>
<d>91.45</d>
<d>91.475</d>
<d>91.5</d>
<d>91.525</d>
<d>91.55</d>
<d>91.575</d>
<d>91.6</d>
<d>91.625</d>
<d>91.65</d>
<d>91.675</d>
<d>91.7</d>
<d>91.725</d>
<d>91.75</d>
<d>91.775</d>
<d>91.8</d>
<d>91.825</d>
<d>91.85</d>
<d>91.875</d>
<d>91.9</d>
<d>91.925</d>
<d>91.95</d>
<d>91.975</d>
<d>92</d>
<d>92.025</d>
<d>92.05</d>
<d>92.075</d>
<d>92.1</d>
<d>92.125</d>
<d>92.15</d>
<d>92.175</d>
<d>92.2</d>
<d>92.225</d>
<d>92.25</d>
<d>92.275</d>
<d>92.3</d>
<d>92.325</d>
<d>92.35</d>
<d>92.375</d>
<d>92.4</d>
<d>92.425</d>
<d>92.45</d>
<d>92.475</d>
<d>92.5</d>
<d>92.525</d>
<d>92.55</d>
<d>92.575</d>
<d>92.6</d>
<d>92.625</d>
<d>92.65</d>
<d>92.675</d>
<d>92.7</d>
<d>92.725</d>
<d>92.75</d>
<d>92.775</d>
<d>92.8</d>
<d>92.825</d>
<d>92.85</d>
<d>92.875</d>
<d>92.9</d>
<d>92.925</d>
<d>92.95</d>
<d>92.975</d>
<d>93</d>
<d>93.025</d>
<d>93.05</d>
<d>93.075</d>
<d>93.1</d>
<d>93.125</d>
<d>93.15</d>
<d>93.175</d>
<d>93.2</d>
<d>93.225</d>
<d>93.25</d>
<d>93.275</d>
<d>93.3</d>
<d>93.325</d>
<d>93.35</d>
<d>93.375</d>
<d>93.4</d>
<d>93.425</d>
<d>93.45</d>
<d>93.475</d>
<d>93.5</d>
<d>93.525</d>
<d>93.55</d>
<d>93.575</d>
<d>93.6</d>
<d>93.625</d>
<d>93.65</d>
<d>93.675</d>
<d>93.7</d>
<d>93.725</d>
<d>93.75</d>
<d>93.775</d>
<d>93.8</d>
<d>93.825</d>
<d>93.85</d>
<d>93.875</d>
<d>93.9</d>
<d>93.925</d>
<d>93.95</d>
<d>93.975</d>
<d>94</d>
<d>94.025</d>
<d>94.05</d>
<d>94.075</d>
<d>94.1</d>
<d>94.125</d>
<d>94.15</d>
<d>94.175</d>
<d>94.2</d>
<d>94.225</d>
<d>94.25</d>
<d>94.275</d>
<d>94.3</d>
<d>94.325</d>
<d>94.35</d>
<d>94.375</d>
<d>94.4</d>
<d>94.425</d>
<d>94.45</d>
<d>94.475</d>
<d>94.5</d>
<d>94.525</d>
<d>94.55</d>
<d>94.575</d>
<d>94.6</d>
<d>94.625</d>
<d>94.65</d>
<d>94.675</d>
<d>94.7</d>
<d>94.725</d>
<d>94.75</d>
<d>94.775</d>
<d>94.8</d>
<d>94.825</d>
<d>94.85</d>
<d>94.875</d>
<d>94.9</d>
<d>94.925</d>
<d>94.95</d>
<d>94.975</d>
<d>95</d>
<d>95.025</d>
<d>95.05</d>
<d>95.075</d>
<d>95.1</d>
<d>95.125</d>
<d>95.15</d>
<d>95.175</d>
<d>95.2</d>
<d>95.225</d>
<d>95.25</d>
<d>95.275</d>
<d>95.3</d>
<d>95.325</d>
<d>95.35</d>
<d>95.375</d>
<d>95.4</d>
<d>95.425</d>
<d>95.45</d>
<d>95.475</d>
<d>95.5</d>
<d>95.525</d>
<d>95.55</d>
<d>95.575</d>
<d>95.6</d>
<d>95.625</d>
<d>95.65</d>
<d>95.675</d>
<d>95.7</d>
<d>95.725</d>
<d>95.75</d>
<d>95.775</d>
<d>95.8</d>
<d>95.825</d>
<d>95.85</d>
<d>95.875</d>
<d>95.9</d>
<d>95.925</d>
<d>95.95</d>
<d>95.975</d>
<d>96</d>
<d>96.025</d>
<d>96.05</d>
<d>96.075</d>
<d>96.1</d>
<d>96.125</d>
<d>96.15</d>
<d>96.175</d>
<d>96.2</d>
<d>96.225</d>
<d>96.25</d>
<d>96.275</d>
<d>96.3</d>
<d>96.325</d>
<d>96.35</d>
<d>96.375</d>
<d>96.4</d>
<d>96.425</d>
<d>96.45</d>
<d>96.475</d>
<d>96.5</d>
<d>96.525</d>
<d>96.55</d>
<d>96.575</d>
<d>96.6</d>
<d>96.625</d>
<d>96.65</d>
<d>96.675</d>
<d>96.7</d>
<d>96.725</d>
<d>96.75</d>
<d>96.775</d>
<d>96.8</d>
<d>96.825</d>
<d>96.85</d>
<d>96.875</d>
<d>96.9</d>
<d>96.925</d>
<d>96.95</d>
<d>96.975</d>
<d>97</d>
<d>97.025</d>
<d>97.05</d>
<d>97.075</d>
<d>97.1</d>
<d>97.125</d>
<d>97.15</d>
<d>97.175</d>
<d>97.2</d>
<d>97.225</d>
<d>97.25</d>
<d>97.275</d>
<d>97.3</d>
<d>97.325</d>
<d>97.35</d>
<d>97.375</d>
<d>97.4</d>
<d>97.425</d>
<d>97.45</d>
<d>97.475</d>
<d>97.5</d>
<d>97.525</d>
<d>97.55</d>
<d>97.575</d>
<d>97.6</d>
<d>97.625</d>
<d>97.65</d>
<d>97.675</d>
<d>97.7</d>
<d>97.725</d>
<d>97.75</d>
<d>97.775</d>
<d>97.8</d>
<d>97.825</d>
<d>97.85</d>
<d>97.875</d>
<d>97.9</d>
<d>97.925</d>
<d>97.95</d>
<d>97.975</d>
<d>98</d>
<d>98.025</d>
<d>98.05</d>
<d>98.075</d>
<d>98.1</d>
<d>98.125</d>
<d>98.15</d>
<d>98.175</d>
<d>98.2</d>
<d>98.225</d>
<d>98.25</d>
<d>98.275</d>
<d>98.3</d>
<d>98.325</d>
<d>98.35</d>
<d>98.375</d>
<d>98.4</d>
<d>98.425</d>
<d>98.45</d>
<d>98.475</d>
<d>98.5</d>
<d>98.525</d>
<d>98.55</d>
<d>98.575</d>
<d>98.6</d>
<d>98.625</d>
<d>98.65</d>
<d>98.675</d>
<d>98.7</d>
<d>98.725</d>
<d>98.75</d>
<d>98.775</d>
<d>98.8</d>
<d>98.825</d>
<d>98.85</d>
<d>98.875</d>
<d>98.9</d>
<d>98.925</d>
<d>98.95</d>
<d>98.975</d>
<d>99</d>
<d>99.025</d>
<d>99.05</d>
<d>99.075</d>
<d>99.1</d>
<d>99.125</d>
<d>99.15</d>
<d>99.175</d>
<d>99.2</d>
<d>99.225</d>
<d>99.25</d>
<d>99.275</d>
<d>99.3</d>
<d>99.325</d>
<d>99.35</d>
<d>99.375</d>
<d>99.4</d>
<d>99.425</d>
<d>99.45</d>
<d>99.475</d>
<d>99.5</d>
<d>99.525</d>
<d>99.55</d>
<d>99.575</d>
<d>99.6</d>
<d>99.625</d>
<d>99.65</d>
<d>99.675</d>
<d>99.7</d>
<d>99.725</d>
<d>99.75</d>
<d>99.775</d>
<d>99.8</d>
<d>99.825</d>
<d>99.85</d>
<d>99.875</d>
<d>99.9</d>
<d>99.925</d>
<d>99.95</d>
<d>99.975</d>
</Subcolumn>
</XAdvancedColumn>
<YColumn Width="59" Decimals="15" Subcolumns="1">

<Subcolumn/>
</YColumn>
<YColumn Width="103" Decimals="6" Subcolumns="1">
<Title>3</Title>
<Subcolumn>
<d>-0.003962</d>
<d>-0.010065</d>
<d>-0.016169</d>
<d>-0.003962</d>
<d>0.002142</d>
<d>0.008245</d>
<d>0.002142</d>
<d>0.008245</d>
<d>0.014349</d>
<d>0.002142</d>
<d>-0.003962</d>
<d>0.002142</d>
<d>-0.010065</d>
<d>-0.003962</d>
<d>-0.003962</d>
<d>-0.010065</d>
<d>0.002142</d>
<d>0.002142</d>
<d>0.008245</d>
<d>0.008245</d>
<d>0.002142</d>
<d>-0.010065</d>
<d>0.008245</d>
<d>0.014349</d>
<d>0.008245</d>
<d>0.008245</d>
<d>0.020452</d>
<d>0.014349</d>
<d>0.002142</d>
<d>0.008245</d>
<d>0.002142</d>
<d>-0.003962</d>
<d>0.002142</d>
<d>0.002142</d>
<d>0.020452</d>
<d>0.03266</d>
<d>0.03266</d>
<d>0.008245</d>
<d>0.008245</d>
<d>0.002142</d>
<d>-0.003962</d>
<d>-0.003962</d>
<d>-0.022272</d>
<d>-0.028376</d>
<d>-0.022272</d>
<d>-0.022272</d>
<d>-0.003962</d>
<d>0.002142</d>
<d>-0.003962</d>
<d>-0.003962</d>
<d>0.008245</d>
<d>-0.003962</d>
<d>-0.010065</d>
<d>-0.003962</d>
<d>0.008245</d>
<d>0.008245</d>
<d>0.008245</d>
<d>0.002142</d>
<d>-0.003962</d>
<d>0.002142</d>
<d>0.014349</d>
<d>-0.010065</d>
<d>-0.016169</d>
<d>-0.016169</d>
<d>-0.010065</d>
<d>0.002142</d>
<d>-0.003962</d>
<d>-0.010065</d>
<d>-0.010065</d>
<d>-0.010065</d>
<d>0.002142</d>
<d>0.002142</d>
<d>0.014349</d>
<d>0.014349</d>
<d>0.002142</d>
<d>0.002142</d>
<d>-0.003962</d>
<d>-0.016169</d>
<d>-0.016169</d>
<d>-0.022272</d>
<d>-0.010065</d>
<d>-0.010065</d>
<d>-0.016169</d>
<d>-0.003962</d>
<d>0.002142</d>
<d>0.008245</d>
<d>0.008245</d>
<d>0.002142</d>
<d>-0.010065</d>
<d>-0.003962</d>
<d>-0.003962</d>
<d>-0.003962</d>
<d>0.002142</d>
<d>-0.010065</d>
<d>0.002142</d>
<d>-0.010065</d>
<d>-0.010065</d>
<d>-0.003962</d>
<d>0.002142</d>
<d>-0.003962</d>
<d>-0.010065</d>
<d>-0.010065</d>
<d>-0.003962</d>
<d>0.002142</d>
<d>0.002142</d>
<d>0.002142</d>
<d>0.002142</d>
<d>0.014349</d>
<d>0.002142</d>
<d>0.008245</d>
<d>0.002142</d>
<d>-0.003962</d>
<d>-0.003962</d>
<d>0.002142</d>
<d>-0.003962</d>
<d>-0.003962</d>
<d>-0.010065</d>
<d>-0.010065</d>
<d>0.002142</d>
<d>-0.003962</d>
<d>0.002142</d>
<d>-0.003962</d>
<d>-0.010065</d>
<d>0.008245</d>
<d>0.002142</d>
<d>-0.003962</d>
<d>-0.010065</d>
<d>-0.022272</d>
<d>-0.022272</d>
<d>-0.040583</d>
<d>-0.022272</d>
<d>-0.003962</d>
<d>0.002142</d>
<d>0.020452</d>
<d>0.026556</d>
<d>0.008245</d>
<d>0.008245</d>
<d>0.026556</d>
<d>0.026556</d>
<d>0.03266</d>
<d>0.03266</d>
<d>0.020452</d>
<d>0.014349</d>
<d>0.014349</d>
<d>0.014349</d>
<d>0.002142</d>
<d>0.014349</d>
<d>0.002142</d>
<d>0.002142</d>
<d>0.002142</d>
<d>0.008245</d>
<d>0.008245</d>
<d>0.008245</d>
<d>-0.003962</d>
<d>-0.016169</d>
<d>-0.022272</d>
<d>-0.016169</d>
<d>-0.016169</d>
<d>-0.003962</d>
<d>-0.003962</d>
<d>-0.010065</d>
<d>-0.010065</d>
<d>-0.003962</d>
<d>0.008245</d>
<d>0.008245</d>
<d>0.014349</d>
<d>0.002142</d>
<d>0.008245</d>
<d>0.002142</d>
<d>0.002142</d>
<d>0.002142</d>
<d>-0.003962</d>
<d>-0.003962</d>
<d>0.008245</d>
<d>0.020452</d>
<d>0.002142</d>
<d>0.008245</d>
<d>0.014349</d>
<d>0.002142</d>
<d>0.002142</d>
<d>-0.003962</d>
<d>0.008245</d>
<d>0.014349</d>
<d>0.008245</d>
<d>0.002142</d>
<d>-0.003962</d>
<d>0.008245</d>
<d>0.026556</d>
<d>0.014349</d>
<d>-0.003962</d>
<d>0.002142</d>
<d>0.008245</d>
<d>0.002142</d>
<d>0.002142</d>
<d>-0.010065</d>
<d>-0.003962</d>
<d>0.002142</d>
<d>0.008245</d>
<d>0.002142</d>
<d>-0.003962</d>
<d>0.008245</d>
<d>0.002142</d>
<d>-0.010065</d>
<d>0.002142</d>
<d>0.002142</d>
<d>0.008245</d>
<d>0.014349</d>
<d>0.020452</d>
<d>0.002142</d>
<d>0.008245</d>
<d>0.002142</d>
<d>0.008245</d>
<d>0.020452</d>
<d>0.020452</d>
<d>0.014349</d>
<d>0.008245</d>
<d>-0.003962</d>
<d>-0.003962</d>
<d>-0.003962</d>
<d>0.002142</d>
<d>0.020452</d>
<d>0.020452</d>
<d>0.008245</d>
<d>0.014349</d>
<d>0.014349</d>
<d>0.002142</d>
<d>-0.003962</d>
<d>0.008245</d>
<d>0.008245</d>
<d>-0.010065</d>
<d>-0.010065</d>
<d>-0.003962</d>
<d>0.002142</d>
<d>0.008245</d>
<d>-0.003962</d>
<d>-0.016169</d>
<d>-0.003962</d>
<d>0.014349</d>
<d>0.014349</d>
<d>0.020452</d>
<d>0.014349</d>
<d>0.014349</d>
<d>0.002142</d>
<d>-0.010065</d>
<d>0.008245</d>
<d>0.008245</d>
<d>0.014349</d>
<d>0.002142</d>
<d>-0.003962</d>
<d>-0.010065</d>
<d>-0.010065</d>
<d>-0.016169</d>
<d>0.002142</d>
<d>0.002142</d>
<d>0.008245</d>
<d>0.002142</d>
<d>0.002142</d>
<d>0.002142</d>
<d>-0.003962</d>
<d>0.002142</d>
<d>-0.010065</d>
<d>0.002142</d>
<d>0.002142</d>
<d>-0.016169</d>
<d>-0.010065</d>
<d>-0.016169</d>
<d>-0.016169</d>
<d>-0.003962</d>
<d>-0.016169</d>
<d>0.008245</d>
<d>0.014349</d>
<d>0.020452</d>
<d>0.026556</d>
<d>0.020452</d>
<d>0.002142</d>
<d>-0.003962</d>
<d>0.008245</d>
<d>-0.003962</d>
<d>-0.010065</d>
<d>-0.010065</d>
<d>-0.003962</d>
<d>0.008245</d>
<d>0.002142</d>
<d>0.014349</d>
<d>0.038763</d>
<d>0.014349</d>
<d>-0.016169</d>
<d>-0.022272</d>
<d>-0.022272</d>
<d>-0.010065</d>
<d>-0.003962</d>
<d>0.008245</d>
<d>0.002142</d>
<d>0.008245</d>
<d>0.002142</d>
<d>0.002142</d>
<d>0.002142</d>
<d>0.008245</d>
<d>0.002142</d>
<d>-0.003962</d>
<d>0.008245</d>
<d>0.008245</d>
<d>-0.003962</d>
<d>-0.003962</d>
<d>-0.010065</d>
<d>-0.010065</d>
<d>-0.003962</d>
<d>-0.010065</d>
<d>-0.010065</d>
<d>-0.016169</d>
<d>-0.010065</d>
<d>-0.016169</d>
<d>-0.010065</d>
<d>-0.016169</d>
<d>-0.022272</d>
<d>-0.016169</d>
<d>-0.010065</d>
<d>0.008245</d>
<d>0.008245</d>
<d>0.002142</d>
<d>0.002142</d>
<d>0.008245</d>
<d>-0.003962</d>
<d>0.002142</d>
<d>0.014349</d>
<d>0.002142</d>
<d>0.008245</d>
<d>0.014349</d>
<d>0.008245</d>
<d>0.008245</d>
<d>0.002142</d>
<d>0.008245</d>
<d>-0.003962</d>
<d>-0.016169</d>
<d>-0.003962</d>
<d>-0.010065</d>
<d>-0.003962</d>
<d>-0.003962</d>
<d>-0.010065</d>
<d>-0.022272</d>
<d>-0.034479</d>
<d>-0.016169</d>
<d>-0.003962</d>
<d>-0.003962</d>
<d>-0.003962</d>
<d>-0.010065</d>
<d>-0.022272</d>
<d>-0.016169</d>
<d>-0.022272</d>
<d>-0.016169</d>
<d>-0.022272</d>
<d>-0.028376</d>
<d>-0.022272</d>
<d>-0.016169</d>
<d>-0.003962</d>
<d>0.008245</d>
<d>0.002142</d>
<d>0.002142</d>
<d>0.008245</d>
<d>0.002142</d>
<d>0.002142</d>
<d>0.002142</d>
<d>-0.003962</d>
<d>-0.003962</d>
<d>0.014349</d>
<d>0.002142</d>
<d>0.008245</d>
<d>0.014349</d>
<d>0.008245</d>
<d>-0.003962</d>
<d>-0.022272</d>
<d>-0.028376</d>
<d>-0.010065</d>
<d>-0.003962</d>
<d>-0.003962</d>
<d>0.002142</d>
<d>0.002142</d>
<d>-0.003962</d>
<d>0.002142</d>
<d>-0.010065</d>
<d>-0.010065</d>
<d>-0.003962</d>
<d>-0.003962</d>
<d>0.002142</d>
<d>-0.003962</d>
<d>-0.010065</d>
<d>-0.016169</d>
<d>-0.003962</d>
<d>0.002142</d>
<d>0.008245</d>
<d>0.014349</d>
<d>0.002142</d>
<d>0.008245</d>
<d>0.002142</d>
<d>-0.003962</d>
<d>-0.016169</d>
<d>-0.010065</d>
<d>0.008245</d>
<d>0.008245</d>
<d>0.002142</d>
<d>0.002142</d>
<d>-0.571589</d>
<d>-1.261286</d>
<d>-0.388483</d>
<d>0.685736</d>
<d>0.447699</d>
<d>0.166937</d>
<d>0.124212</d>
<d>0.093695</d>
<d>0.069281</d>
<d>0.05097</d>
<d>0.026556</d>
<d>0.014349</d>
<d>0.020452</d>
<d>0.020452</d>
<d>0.008245</d>
<d>0.008245</d>
<d>0.008245</d>
<d>0.008245</d>
<d>0.002142</d>
<d>0.008245</d>
<d>0.002142</d>
<d>0.002142</d>
<d>0.002142</d>
<d>-0.003962</d>
<d>-0.010065</d>
<d>-0.003962</d>
<d>-0.003962</d>
<d>-0.028376</d>
<d>-0.022272</d>
<d>-0.010065</d>
<d>-0.010065</d>
<d>-0.016169</d>
<d>-0.010065</d>
<d>-0.003962</d>
<d>-0.003962</d>
<d>-0.010065</d>
<d>0.002142</d>
<d>0.008245</d>
<d>0.002142</d>
<d>-0.016169</d>
<d>-0.022272</d>
<d>-0.016169</d>
<d>-0.016169</d>
<d>-0.016169</d>
<d>-0.022272</d>
<d>-0.016169</d>
<d>-0.016169</d>
<d>-0.022272</d>
<d>-0.028376</d>
<d>-0.022272</d>
<d>-0.016169</d>
<d>-0.003962</d>
<d>-0.003962</d>
<d>-0.003962</d>
<d>0.014349</d>
<d>0.014349</d>
<d>0.008245</d>
<d>0.008245</d>
<d>-0.003962</d>
<d>0.002142</d>
<d>-0.010065</d>
<d>-0.010065</d>
<d>0.014349</d>
<d>0.014349</d>
<d>-0.010065</d>
<d>-0.010065</d>
<d>-0.003962</d>
<d>0.002142</d>
<d>0.002142</d>
<d>0.008245</d>
<d>0.008245</d>
<d>-0.010065</d>
<d>-0.003962</d>
<d>-0.003962</d>
<d>-0.003962</d>
<d>0.002142</d>
<d>0.002142</d>
<d>0.002142</d>
<d>-0.010065</d>
<d>-0.010065</d>
<d>-0.010065</d>
<d>-0.003962</d>
<d>0.002142</d>
<d>-0.010065</d>
<d>-0.016169</d>
<d>-0.010065</d>
<d>-0.016169</d>
<d>-0.022272</d>
<d>-0.028376</d>
<d>-0.016169</d>
<d>-0.022272</d>
<d>-0.028376</d>
<d>-0.016169</d>
<d>-0.003962</d>
<d>-0.003962</d>
<d>0.014349</d>
<d>0.020452</d>
<d>0.014349</d>
<d>0.014349</d>
<d>0.014349</d>
<d>0.014349</d>
<d>-0.003962</d>
<d>0.008245</d>
<d>0.014349</d>
<d>0.002142</d>
<d>0.002142</d>
<d>0.008245</d>
<d>0.002142</d>
<d>0.002142</d>
<d>0.014349</d>
<d>0.014349</d>
<d>0.026556</d>
<d>0.014349</d>
<d>0.002142</d>
<d>0.002142</d>
<d>0.008245</d>
<d>0.020452</d>
<d>0.014349</d>
<d>0.008245</d>
<d>0.020452</d>
<d>0.014349</d>
<d>0.014349</d>
<d>0.002142</d>
<d>-0.003962</d>
<d>-0.010065</d>
<d>0.002142</d>
<d>-0.022272</d>
<d>-0.016169</d>
<d>-0.016169</d>
<d>-0.010065</d>
<d>0.002142</d>
<d>0.002142</d>
<d>-0.003962</d>
<d>0.002142</d>
<d>0.008245</d>
<d>0.020452</d>
<d>0.002142</d>
<d>0.002142</d>
<d>0.020452</d>
<d>0.026556</d>
<d>0.008245</d>
<d>0.020452</d>
<d>0.020452</d>
<d>0.008245</d>
<d>0.008245</d>
<d>0.020452</d>
<d>0.026556</d>
<d>0.002142</d>
<d>0.002142</d>
<d>0.008245</d>
<d>0.002142</d>
<d>-0.010065</d>
<d>-0.010065</d>
<d>-0.003962</d>
<d>-0.016169</d>
<d>-0.010065</d>
<d>0.008245</d>
<d>-0.016169</d>
<d>-0.010065</d>
<d>-0.010065</d>
<d>-0.003962</d>
<d>0.002142</d>
<d>0.002142</d>
<d>0.008245</d>
<d>0.014349</d>
<d>0.014349</d>
<d>0.014349</d>
<d>0.008245</d>
<d>0.008245</d>
<d>-0.003962</d>
<d>-0.010065</d>
<d>-0.003962</d>
<d>0.002142</d>
<d>-0.010065</d>
<d>-0.016169</d>
<d>-0.003962</d>
<d>0.002142</d>
<d>-0.003962</d>
<d>-0.016169</d>
<d>-0.016169</d>
<d>-0.016169</d>
<d>-0.003962</d>
<d>-0.003962</d>
<d>0.002142</d>
<d>-0.010065</d>
<d>0.008245</d>
<d>0.002142</d>
<d>0.002142</d>
<d>0.014349</d>
<d>0.002142</d>
<d>0.002142</d>
<d>0.002142</d>
<d>0.008245</d>
<d>0.020452</d>
<d>0.020452</d>
<d>0.002142</d>
<d>0.002142</d>
<d>0.002142</d>
<d>-0.003962</d>
<d>-0.003962</d>
<d>0.008245</d>
<d>-0.003962</d>
<d>-0.003962</d>
<d>0.002142</d>
<d>0.008245</d>
<d>0.020452</d>
<d>0.020452</d>
<d>0.014349</d>
<d>-0.003962</d>
<d>-0.010065</d>
<d>-0.003962</d>
<d>0.002142</d>
<d>-0.003962</d>
<d>-0.010065</d>
<d>-0.016169</d>
<d>-0.022272</d>
<d>-0.010065</d>
<d>0.002142</d>
<d>0.008245</d>
<d>-0.003962</d>
<d>-0.003962</d>
<d>-0.003962</d>
<d>-0.003962</d>
<d>-0.010065</d>
<d>-0.010065</d>
<d>-0.003962</d>
<d>0.002142</d>
<d>0.008245</d>
<d>0.002142</d>
<d>0.014349</d>
<d>0.008245</d>
<d>0.020452</d>
<d>0.026556</d>
<d>0.014349</d>
<d>0.002142</d>
<d>0.002142</d>
<d>-0.003962</d>
<d>-0.003962</d>
<d>0.020452</d>
<d>0.020452</d>
<d>0.002142</d>
<d>0.002142</d>
<d>0.002142</d>
<d>0.008245</d>
<d>0.008245</d>
<d>0.008245</d>
<d>0.002142</d>
<d>-0.003962</d>
<d>-0.016169</d>
<d>-0.010065</d>
<d>0.002142</d>
<d>0.008245</d>
<d>0.008245</d>
<d>0.008245</d>
<d>0.008245</d>
<d>-0.003962</d>
<d>-0.003962</d>
<d>-0.010065</d>
<d>-0.010065</d>
<d>-0.003962</d>
<d>0.002142</d>
<d>-0.003962</d>
<d>-0.003962</d>
<d>0.002142</d>
<d>-0.003962</d>
<d>-0.003962</d>
<d>-0.003962</d>
<d>0.002142</d>
<d>-0.003962</d>
<d>-0.010065</d>
<d>0.002142</d>
<d>-0.003962</d>
<d>-0.003962</d>
<d>-0.010065</d>
<d>-0.010065</d>
<d>-0.016169</d>
<d>-0.016169</d>
<d>0.002142</d>
<d>-0.010065</d>
<d>-0.003962</d>
<d>-0.016169</d>
<d>-0.010065</d>
<d>-0.003962</d>
<d>0.008245</d>
<d>0.008245</d>
<d>0.014349</d>
<d>0.020452</d>
<d>0.014349</d>
<d>-0.003962</d>
<d>-0.003962</d>
<d>0.020452</d>
<d>0.002142</d>
<d>0.008245</d>
<d>0.008245</d>
<d>-0.010065</d>
<d>-0.010065</d>
<d>0.002142</d>
<d>-0.003962</d>
<d>0.008245</d>
<d>0.014349</d>
<d>0.008245</d>
<d>0.014349</d>
<d>-0.003962</d>
<d>-0.003962</d>
<d>-0.016169</d>
<d>-0.022272</d>
<d>-0.016169</d>
<d>-0.003962</d>
<d>0.014349</d>
<d>0.008245</d>
<d>-0.003962</d>
<d>-0.010065</d>
<d>-0.003962</d>
<d>-0.010065</d>
<d>-0.010065</d>
<d>-0.010065</d>
<d>-0.016169</d>
<d>-0.010065</d>
<d>-0.010065</d>
<d>-0.010065</d>
<d>0.008245</d>
<d>0.026556</d>
<d>0.008245</d>
<d>0.002142</d>
<d>-0.010065</d>
<d>-0.003962</d>
<d>0.002142</d>
<d>0.008245</d>
<d>0.002142</d>
<d>-0.003962</d>
<d>0.014349</d>
<d>-0.003962</d>
<d>-0.010065</d>
<d>-0.010065</d>
<d>-0.010065</d>
<d>-0.016169</d>
<d>0.002142</d>
<d>0.008245</d>
<d>0.002142</d>
<d>0.008245</d>
<d>-0.010065</d>
<d>-0.016169</d>
<d>-0.022272</d>
<d>-0.010065</d>
<d>0.002142</d>
<d>0.020452</d>
<d>0.008245</d>
<d>0.008245</d>
<d>0.002142</d>
<d>0.002142</d>
<d>-0.016169</d>
<d>-0.016169</d>
<d>0.014349</d>
<d>0.008245</d>
<d>0.014349</d>
<d>0.014349</d>
<d>0.002142</d>
<d>0.014349</d>
<d>0.014349</d>
<d>0.002142</d>
<d>-0.003962</d>
<d>0.002142</d>
<d>-0.010065</d>
<d>0.002142</d>
<d>0.008245</d>
<d>0.008245</d>
<d>0.008245</d>
<d>0.008245</d>
<d>0.002142</d>
<d>-0.010065</d>
<d>-0.010065</d>
<d>-0.003962</d>
<d>0.002142</d>
<d>-0.010065</d>
<d>0.002142</d>
<d>-0.003962</d>
<d>-0.003962</d>
<d>-0.003962</d>
<d>-0.003962</d>
<d>-0.003962</d>
<d>0.014349</d>
<d>0.014349</d>
<d>0.008245</d>
<d>0.008245</d>
<d>0.026556</d>
<d>0.014349</d>
<d>0.008245</d>
<d>0.014349</d>
<d>-0.003962</d>
<d>0.002142</d>
<d>0.008245</d>
<d>-0.003962</d>
<d>-0.003962</d>
<d>-0.003962</d>
<d>0.014349</d>
<d>0.002142</d>
<d>0.014349</d>
<d>0.008245</d>
<d>0.002142</d>
<d>0.008245</d>
<d>0.014349</d>
<d>0.020452</d>
<d>0.008245</d>
<d>-0.010065</d>
<d>0.008245</d>
<d>0.014349</d>
<d>0.008245</d>
<d>0.014349</d>
<d>0.002142</d>
<d>-0.010065</d>
<d>-0.016169</d>
<d>-0.016169</d>
<d>-0.022272</d>
<d>-0.022272</d>
<d>-0.010065</d>
<d>0.002142</d>
<d>0.008245</d>
<d>0.008245</d>
<d>0.014349</d>
<d>0.008245</d>
<d>0.014349</d>
<d>0.014349</d>
<d>0.002142</d>
<d>-0.003962</d>
<d>0.002142</d>
<d>-0.016169</d>
<d>-0.016169</d>
<d>-0.010065</d>
<d>-0.003962</d>
<d>0.002142</d>
<d>0.008245</d>
<d>-0.010065</d>
<d>-0.010065</d>
<d>-0.016169</d>
<d>-0.016169</d>
<d>-0.003962</d>
<d>-0.003962</d>
<d>-0.010065</d>
<d>-0.003962</d>
<d>-0.003962</d>
<d>-0.003962</d>
<d>-0.003962</d>
<d>-0.003962</d>
<d>-0.003962</d>
<d>-0.003962</d>
<d>0.002142</d>
<d>-0.003962</d>
<d>-0.003962</d>
<d>-0.003962</d>
<d>-0.010065</d>
<d>-0.010065</d>
<d>0.002142</d>
<d>0.002142</d>
<d>0.002142</d>
<d>0.002142</d>
<d>-0.010065</d>
<d>-0.022272</d>
<d>-0.010065</d>
<d>-0.003962</d>
<d>0.008245</d>
<d>0.008245</d>
<d>-0.010065</d>
<d>-0.003962</d>
<d>0.002142</d>
<d>0.014349</d>
<d>-0.003962</d>
<d>0.008245</d>
<d>-0.003962</d>
<d>-0.003962</d>
<d>0.002142</d>
<d>0.002142</d>
<d>0.008245</d>
<d>-0.003962</d>
<d>-0.010065</d>
<d>-0.010065</d>
<d>-0.003962</d>
<d>-0.003962</d>
<d>0.008245</d>
<d>0.014349</d>
<d>0.008245</d>
<d>0.002142</d>
<d>-0.003962</d>
<d>-0.016169</d>
<d>-0.010065</d>
<d>-0.003962</d>
<d>-0.010065</d>
<d>-0.003962</d>
<d>-0.016169</d>
<d>-0.010065</d>
<d>0.002142</d>
<d>0.002142</d>
<d>0.002142</d>
<d>-0.003962</d>
<d>0.002142</d>
<d>0.008245</d>
<d>0.014349</d>
<d>0.020452</d>
<d>0.014349</d>
<d>0.008245</d>
<d>0.008245</d>
<d>0.002142</d>
<d>0.002142</d>
<d>-0.003962</d>
<d>-0.010065</d>
<d>-0.022272</d>
<d>-0.016169</d>
<d>-0.016169</d>
<d>-0.022272</d>
<d>-0.016169</d>
<d>-0.016169</d>
<d>-0.016169</d>
<d>0.002142</d>
<d>0.002142</d>
<d>0.002142</d>
<d>0.008245</d>
<d>0.008245</d>
<d>0.014349</d>
<d>0.008245</d>
<d>0.014349</d>
<d>0.03266</d>
<d>0.026556</d>
<d>0.014349</d>
<d>0.020452</d>
<d>0.002142</d>
<d>-0.010065</d>
<d>-0.016169</d>
<d>-0.022272</d>
<d>-0.016169</d>
<d>-0.003962</d>
<d>0.008245</d>
<d>-0.003962</d>
<d>0.020452</d>
<d>0.014349</d>
<d>0.014349</d>
<d>0.002142</d>
<d>0.002142</d>
<d>0.020452</d>
<d>0.026556</d>
<d>0.020452</d>
<d>0.002142</d>
<d>-0.010065</d>
<d>-0.003962</d>
<d>0.008245</d>
<d>0.014349</d>
<d>0.002142</d>
<d>-0.003962</d>
<d>0.002142</d>
<d>0.008245</d>
<d>0.008245</d>
<d>0.014349</d>
<d>0.014349</d>
<d>0.014349</d>
<d>0.008245</d>
<d>0.002142</d>
<d>0.002142</d>
<d>0.008245</d>
<d>0.020452</d>
<d>0.014349</d>
<d>0.002142</d>
<d>0.002142</d>
<d>-0.003962</d>
<d>-0.022272</d>
<d>-0.016169</d>
<d>-0.022272</d>
<d>-0.010065</d>
<d>-0.003962</d>
<d>-0.010065</d>
<d>-0.010065</d>
<d>-0.003962</d>
<d>-0.003962</d>
<d>0.002142</d>
<d>0.014349</d>
<d>0.008245</d>
<d>0.002142</d>
<d>0.008245</d>
<d>0.002142</d>
<d>-0.010065</d>
<d>-0.010065</d>
<d>0.008245</d>
<d>0.014349</d>
<d>0.020452</d>
<d>0.03266</d>
<d>0.008245</d>
<d>0.002142</d>
<d>-0.003962</d>
<d>-0.003962</d>
<d>0.008245</d>
<d>0.008245</d>
<d>0.002142</d>
<d>0.014349</d>
<d>0.008245</d>
<d>0.008245</d>
<d>0.020452</d>
<d>0.002142</d>
<d>-0.003962</d>
<d>0.002142</d>
<d>0.008245</d>
<d>0.008245</d>
<d>0.014349</d>
<d>0.014349</d>
<d>0.03266</d>
<d>0.020452</d>
<d>0.020452</d>
<d>0.014349</d>
<d>-0.003962</d>
<d>-0.010065</d>
<d>-0.010065</d>
<d>-0.003962</d>
<d>-0.003962</d>
<d>0.002142</d>
<d>-0.003962</d>
<d>-0.010065</d>
<d>-0.010065</d>
<d>-0.010065</d>
<d>0.002142</d>
<d>0.002142</d>
<d>0.002142</d>
<d>-0.010065</d>
<d>-0.010065</d>
<d>0.002142</d>
<d>-0.003962</d>
<d>0.008245</d>
<d>0.008245</d>
<d>0.008245</d>
<d>-0.010065</d>
<d>-0.010065</d>
<d>-0.010065</d>
<d>-0.028376</d>
<d>-0.028376</d>
<d>-0.016169</d>
<d>-0.016169</d>
<d>-0.016169</d>
<d>-0.003962</d>
<d>-0.003962</d>
<d>-0.003962</d>
<d>0.002142</d>
<d>0.008245</d>
<d>0.008245</d>
<d>0.008245</d>
<d>0.020452</d>
<d>-0.003962</d>
<d>0.002142</d>
<d>-0.003962</d>
<d>-0.003962</d>
<d>-0.003962</d>
<d>-0.003962</d>
<d>-0.003962</d>
<d>0.002142</d>
<d>0.002142</d>
<d>-0.016169</d>
<d>-0.016169</d>
<d>0.008245</d>
<d>0.008245</d>
<d>0.014349</d>
<d>0.002142</d>
<d>-0.010065</d>
<d>-0.010065</d>
<d>0.002142</d>
<d>-0.003962</d>
<d>-0.003962</d>
<d>-0.010065</d>
<d>-0.003962</d>
<d>0.002142</d>
<d>0.002142</d>
<d>0.002142</d>
<d>0.002142</d>
<d>0.014349</d>
<d>0.020452</d>
<d>0.014349</d>
<d>0.026556</d>
<d>0.020452</d>
<d>0.020452</d>
<d>0.020452</d>
<d>0.008245</d>
<d>0.002142</d>
<d>0.008245</d>
<d>-0.003962</d>
<d>-0.010065</d>
<d>0.002142</d>
<d>-0.003962</d>
<d>-0.003962</d>
<d>-0.003962</d>
<d>0.008245</d>
<d>0.002142</d>
<d>-0.003962</d>
<d>0.002142</d>
<d>0.002142</d>
<d>0.002142</d>
<d>0.002142</d>
<d>-0.010065</d>
<d>0.008245</d>
<d>0.008245</d>
<d>-0.016169</d>
<d>-0.016169</d>
<d>0.002142</d>
<d>-0.010065</d>
<d>0.002142</d>
<d>-0.003962</d>
<d>-0.010065</d>
<d>-0.003962</d>
<d>-0.010065</d>
<d>-0.022272</d>
<d>-0.010065</d>
<d>-0.003962</d>
<d>0.002142</d>
<d>0.002142</d>
<d>-0.010065</d>
<d>-0.016169</d>
<d>-0.016169</d>
<d>-0.003962</d>
<d>0.002142</d>
<d>0.008245</d>
<d>0.002142</d>
<d>-0.003962</d>
<d>-0.010065</d>
<d>-0.003962</d>
<d>-0.022272</d>
<d>-0.010065</d>
<d>-0.010065</d>
<d>0.002142</d>
<d>0.008245</d>
<d>0.008245</d>
<d>0.002142</d>
<d>0.008245</d>
<d>0.014349</d>
<d>0.008245</d>
<d>0.008245</d>
<d>0.008245</d>
<d>-0.003962</d>
<d>-0.003962</d>
<d>0.002142</d>
<d>0.014349</d>
<d>0.014349</d>
<d>0.002142</d>
<d>0.008245</d>
<d>0.008245</d>
<d>0.014349</d>
<d>0.002142</d>
<d>-0.010065</d>
<d>-0.003962</d>
<d>-0.003962</d>
<d>0.002142</d>
<d>0.002142</d>
<d>-0.010065</d>
<d>0.008245</d>
<d>0.020452</d>
<d>-0.003962</d>
<d>-0.003962</d>
<d>0.002142</d>
<d>0.002142</d>
<d>-0.010065</d>
<d>-0.003962</d>
<d>-0.010065</d>
<d>-0.003962</d>
<d>0.002142</d>
<d>-0.003962</d>
<d>-0.003962</d>
<d>-0.010065</d>
<d>-0.010065</d>
<d>-0.003962</d>
<d>0.002142</d>
<d>-0.010065</d>
<d>-0.010065</d>
<d>-0.010065</d>
<d>0.008245</d>
<d>0.008245</d>
<d>0.008245</d>
<d>0.008245</d>
<d>0.008245</d>
<d>0.002142</d>
<d>0.002142</d>
<d>0.008245</d>
<d>-0.003962</d>
<d>-0.003962</d>
<d>0.008245</d>
<d>0.002142</d>
<d>0.026556</d>
<d>0.026556</d>
<d>0.014349</d>
<d>0.008245</d>
<d>0.002142</d>
<d>-0.010065</d>
<d>0.002142</d>
<d>0.008245</d>
<d>0.014349</d>
<d>-0.003962</d>
<d>-0.010065</d>
<d>-0.003962</d>
<d>0.002142</d>
<d>-0.003962</d>
<d>-0.003962</d>
<d>0.002142</d>
<d>-0.003962</d>
<d>0.002142</d>
<d>-0.010065</d>
<d>-0.016169</d>
<d>0.002142</d>
<d>-0.010065</d>
<d>-0.010065</d>
<d>-0.003962</d>
<d>0.008245</d>
<d>0.008245</d>
<d>0.008245</d>
<d>0.008245</d>
<d>0.002142</d>
<d>0.008245</d>
<d>0.008245</d>
<d>0.008245</d>
<d>0.008245</d>
<d>0.008245</d>
<d>0.014349</d>
<d>0.020452</d>
<d>0.008245</d>
<d>0.03266</d>
<d>0.026556</d>
<d>0.020452</d>
<d>0.002142</d>
<d>-0.003962</d>
<d>0.008245</d>
<d>0.002142</d>
<d>-0.003962</d>
<d>0.002142</d>
<d>0.008245</d>
<d>0.002142</d>
<d>-0.016169</d>
<d>-0.016169</d>
<d>-0.003962</d>
<d>0.002142</d>
<d>-0.003962</d>
<d>-0.003962</d>
<d>0.008245</d>
<d>0.020452</d>
<d>0.020452</d>
<d>0.014349</d>
<d>0.002142</d>
<d>0.014349</d>
<d>0.002142</d>
<d>0.008245</d>
<d>0.008245</d>
<d>-0.016169</d>
<d>-0.010065</d>
<d>-0.003962</d>
<d>0.002142</d>
<d>-0.010065</d>
<d>-0.003962</d>
<d>0.002142</d>
<d>0.008245</d>
<d>0.014349</d>
<d>0.002142</d>
<d>0.002142</d>
<d>0.002142</d>
<d>-0.003962</d>
<d>0.008245</d>
<d>0.002142</d>
<d>-0.003962</d>
<d>0.008245</d>
<d>0.002142</d>
<d>0.008245</d>
<d>0.014349</d>
<d>0.002142</d>
<d>0.014349</d>
<d>0.014349</d>
<d>0.026556</d>
<d>0.008245</d>
<d>0.002142</d>
<d>-0.003962</d>
<d>0.008245</d>
<d>0.014349</d>
<d>0.002142</d>
<d>0.008245</d>
<d>0.014349</d>
<d>0.020452</d>
<d>0.008245</d>
<d>-0.003962</d>
<d>-0.003962</d>
<d>0.002142</d>
<d>-0.003962</d>
<d>-0.003962</d>
<d>0.008245</d>
<d>-0.003962</d>
<d>0.002142</d>
<d>0.008245</d>
<d>-0.003962</d>
<d>0.002142</d>
<d>-0.003962</d>
<d>-0.010065</d>
<d>-0.016169</d>
<d>-0.010065</d>
<d>-0.003962</d>
<d>-0.003962</d>
<d>-0.010065</d>
<d>-0.016169</d>
<d>0.002142</d>
<d>-0.016169</d>
<d>-0.016169</d>
<d>-0.028376</d>
<d>-0.003962</d>
<d>0.002142</d>
<d>-0.016169</d>
<d>-0.022272</d>
<d>-0.016169</d>
<d>-0.022272</d>
<d>-0.022272</d>
<d>-0.016169</d>
<d>-0.016169</d>
<d>-0.016169</d>
<d>-0.003962</d>
<d>-0.010065</d>
<d>-0.016169</d>
<d>-0.022272</d>
<d>-0.016169</d>
<d>-0.016169</d>
<d>0.002142</d>
<d>-0.003962</d>
<d>0.002142</d>
<d>-0.003962</d>
<d>0.002142</d>
<d>0.002142</d>
<d>-0.010065</d>
<d>-0.010065</d>
<d>-0.003962</d>
<d>-0.003962</d>
<d>0.002142</d>
<d>0.014349</d>
<d>0.008245</d>
<d>0.008245</d>
<d>0.020452</d>
<d>0.008245</d>
<d>0.008245</d>
<d>0.014349</d>
<d>0.002142</d>
<d>0.002142</d>
<d>0.002142</d>
<d>-0.003962</d>
<d>-0.003962</d>
<d>0.008245</d>
<d>0.008245</d>
<d>0.002142</d>
<d>-0.003962</d>
<d>-0.003962</d>
<d>-0.003962</d>
<d>0.008245</d>
<d>0.014349</d>
<d>-0.010065</d>
<d>-0.010065</d>
<d>-0.010065</d>
<d>0.002142</d>
<d>0.002142</d>
<d>0.002142</d>
<d>-0.010065</d>
<d>-0.003962</d>
<d>0.002142</d>
<d>0.008245</d>
<d>0.014349</d>
<d>0.008245</d>
<d>-0.016169</d>
<d>-0.016169</d>
<d>0.002142</d>
<d>0.002142</d>
<d>0.008245</d>
<d>0.008245</d>
<d>0.026556</d>
<d>0.026556</d>
<d>0.020452</d>
<d>0.014349</d>
<d>0.002142</d>
<d>0.002142</d>
<d>0.002142</d>
<d>-0.003962</d>
<d>-0.003962</d>
<d>-0.010065</d>
<d>-0.003962</d>
<d>0.002142</d>
<d>0.008245</d>
<d>0.014349</d>
<d>0.014349</d>
<d>0.002142</d>
<d>0.002142</d>
<d>0.008245</d>
<d>0.008245</d>
<d>0.020452</d>
<d>0.008245</d>
<d>0.014349</d>
<d>0.008245</d>
<d>0.002142</d>
<d>-0.003962</d>
<d>0.002142</d>
<d>0.002142</d>
<d>-0.016169</d>
<d>-0.003962</d>
<d>0.002142</d>
<d>0.002142</d>
<d>0.008245</d>
<d>0.008245</d>
<d>0.008245</d>
<d>0.002142</d>
<d>0.008245</d>
<d>0.002142</d>
<d>-0.010065</d>
<d>-0.003962</d>
<d>-0.571589</d>
<d>-1.261286</d>
<d>-0.406794</d>
<d>0.643011</d>
<d>0.435492</d>
<d>0.17304</d>
<d>0.130316</d>
<d>0.105902</d>
<d>0.075384</d>
<d>0.038763</d>
<d>0.026556</d>
<d>0.026556</d>
<d>0.026556</d>
<d>0.026556</d>
<d>0.020452</d>
<d>0.014349</d>
<d>0.014349</d>
<d>0.008245</d>
<d>0.014349</d>
<d>0.008245</d>
<d>-0.003962</d>
<d>-0.003962</d>
<d>-0.003962</d>
<d>-0.003962</d>
<d>0.002142</d>
<d>-0.003962</d>
<d>0.002142</d>
<d>0.002142</d>
<d>0.002142</d>
<d>-0.016169</d>
<d>-0.010065</d>
<d>-0.010065</d>
<d>-0.010065</d>
<d>-0.003962</d>
<d>-0.003962</d>
<d>0.002142</d>
<d>0.002142</d>
<d>-0.003962</d>
<d>0.002142</d>
<d>0.002142</d>
<d>-0.016169</d>
<d>-0.003962</d>
<d>0.008245</d>
<d>0.002142</d>
<d>0.002142</d>
<d>-0.003962</d>
<d>0.002142</d>
<d>0.014349</d>
<d>0.014349</d>
<d>0.008245</d>
<d>0.014349</d>
<d>0.014349</d>
<d>0.002142</d>
<d>-0.010065</d>
<d>-0.003962</d>
<d>0.002142</d>
<d>0.002142</d>
<d>-0.003962</d>
<d>-0.016169</d>
<d>0.002142</d>
<d>0.008245</d>
<d>0.002142</d>
<d>-0.003962</d>
<d>-0.010065</d>
<d>0.002142</d>
<d>0.008245</d>
<d>-0.003962</d>
<d>0.008245</d>
<d>0.014349</d>
<d>0.008245</d>
<d>-0.010065</d>
<d>0.002142</d>
<d>-0.003962</d>
<d>0.002142</d>
<d>0.008245</d>
<d>0.002142</d>
<d>0.014349</d>
<d>0.002142</d>
<d>-0.003962</d>
<d>-0.003962</d>
<d>-0.003962</d>
<d>-0.010065</d>
<d>0.002142</d>
<d>0.002142</d>
<d>0.002142</d>
<d>-0.003962</d>
<d>0.002142</d>
<d>0.014349</d>
<d>0.014349</d>
<d>0.014349</d>
<d>0.014349</d>
<d>0.008245</d>
<d>0.008245</d>
<d>0.008245</d>
<d>0.008245</d>
<d>0.014349</d>
<d>0.008245</d>
<d>0.014349</d>
<d>0.008245</d>
<d>0.014349</d>
<d>0.026556</d>
<d>0.026556</d>
<d>0.026556</d>
<d>0.014349</d>
<d>-0.003962</d>
<d>-0.022272</d>
<d>-0.010065</d>
<d>-0.010065</d>
<d>0.002142</d>
<d>-0.003962</d>
<d>-0.010065</d>
<d>0.002142</d>
<d>0.014349</d>
<d>0.020452</d>
<d>0.008245</d>
<d>0.008245</d>
<d>0.014349</d>
<d>0.014349</d>
<d>0.014349</d>
<d>0.008245</d>
<d>0.008245</d>
<d>0.020452</d>
<d>-0.010065</d>
<d>-0.010065</d>
<d>0.002142</d>
<d>-0.003962</d>
<d>-0.010065</d>
<d>-0.003962</d>
<d>-0.010065</d>
<d>-0.010065</d>
<d>-0.003962</d>
<d>0.002142</d>
<d>-0.010065</d>
<d>-0.010065</d>
<d>0.008245</d>
<d>0.014349</d>
<d>-0.003962</d>
<d>-0.003962</d>
<d>0.014349</d>
<d>0.008245</d>
<d>0.002142</d>
<d>0.002142</d>
<d>-0.010065</d>
<d>0.002142</d>
<d>-0.003962</d>
<d>-0.003962</d>
<d>0.008245</d>
<d>-0.003962</d>
<d>0.002142</d>
<d>0.020452</d>
<d>0.026556</d>
<d>0.026556</d>
<d>0.020452</d>
<d>0.014349</d>
<d>0.008245</d>
<d>0.002142</d>
<d>0.008245</d>
<d>0.008245</d>
<d>-0.010065</d>
<d>-0.010065</d>
<d>-0.010065</d>
<d>-0.016169</d>
<d>-0.003962</d>
<d>0.014349</d>
<d>0.014349</d>
<d>0.002142</d>
<d>0.002142</d>
<d>0.008245</d>
<d>0.002142</d>
<d>0.002142</d>
<d>-0.010065</d>
<d>-0.003962</d>
<d>0.002142</d>
<d>-0.003962</d>
<d>0.002142</d>
<d>-0.003962</d>
<d>0.002142</d>
<d>0.002142</d>
<d>0.002142</d>
<d>0.002142</d>
<d>-0.003962</d>
<d>-0.003962</d>
<d>0.008245</d>
<d>0.002142</d>
<d>-0.016169</d>
<d>0.014349</d>
<d>0.008245</d>
<d>0.002142</d>
<d>0.014349</d>
<d>0.014349</d>
<d>0.008245</d>
<d>0.020452</d>
<d>0.014349</d>
<d>0.002142</d>
<d>0.008245</d>
<d>0.002142</d>
<d>0.002142</d>
<d>0.008245</d>
<d>-0.003962</d>
<d>0.002142</d>
<d>-0.003962</d>
<d>0.002142</d>
<d>0.002142</d>
<d>0.014349</d>
<d>0.020452</d>
<d>-0.003962</d>
<d>0.008245</d>
<d>0.008245</d>
<d>0.008245</d>
<d>0.020452</d>
<d>0.026556</d>
<d>0.014349</d>
<d>0.014349</d>
<d>0.008245</d>
<d>0.008245</d>
<d>0.008245</d>
<d>0.002142</d>
<d>0.014349</d>
<d>0.014349</d>
<d>0.008245</d>
<d>0.020452</d>
<d>0.020452</d>
<d>0.020452</d>
<d>0.014349</d>
<d>0.008245</d>
<d>-0.010065</d>
<d>0.008245</d>
<d>0.008245</d>
<d>0.014349</d>
<d>0.020452</d>
<d>0.008245</d>
<d>0.002142</d>
<d>0.002142</d>
<d>0.002142</d>
<d>0.008245</d>
<d>0.014349</d>
<d>0.014349</d>
<d>0.002142</d>
<d>-0.003962</d>
<d>-0.003962</d>
<d>0.002142</d>
<d>0.008245</d>
<d>0.008245</d>
<d>0.008245</d>
<d>0.014349</d>
<d>0.020452</d>
<d>0.020452</d>
<d>0.014349</d>
<d>0.002142</d>
<d>0.002142</d>
<d>0.008245</d>
<d>0.008245</d>
<d>0.002142</d>
<d>0.008245</d>
<d>-0.003962</d>
<d>-0.003962</d>
<d>0.002142</d>
<d>0.002142</d>
<d>0.008245</d>
<d>-0.003962</d>
<d>0.002142</d>
<d>-0.010065</d>
<d>-0.016169</d>
<d>0.008245</d>
<d>0.002142</d>
<d>0.008245</d>
<d>0.002142</d>
<d>0.008245</d>
<d>0.020452</d>
<d>0.014349</d>
<d>0.014349</d>
<d>0.002142</d>
<d>0.002142</d>
<d>-0.010065</d>
<d>-0.010065</d>
<d>-0.010065</d>
<d>0.002142</d>
<d>0.002142</d>
<d>-0.010065</d>
<d>-0.003962</d>
<d>-0.010065</d>
<d>-0.003962</d>
<d>-0.003962</d>
<d>-0.010065</d>
<d>-0.010065</d>
<d>-0.003962</d>
<d>-0.003962</d>
<d>0.002142</d>
<d>0.002142</d>
<d>0.002142</d>
<d>-0.003962</d>
<d>-0.003962</d>
<d>-0.003962</d>
<d>-0.010065</d>
<d>-0.003962</d>
<d>0.014349</d>
<d>0.002142</d>
<d>0.002142</d>
<d>0.002142</d>
<d>-0.003962</d>
<d>-0.003962</d>
<d>-0.003962</d>
<d>-0.003962</d>
<d>0.002142</d>
<d>-0.010065</d>
<d>-0.010065</d>
<d>-0.003962</d>
<d>-0.010065</d>
<d>-0.003962</d>
<d>-0.003962</d>
<d>-0.010065</d>
<d>-0.010065</d>
<d>-0.010065</d>
<d>-0.022272</d>
<d>-0.010065</d>
<d>-0.010065</d>
<d>-0.016169</d>
<d>-0.022272</d>
<d>-0.016169</d>
<d>-0.022272</d>
<d>-0.003962</d>
<d>-0.003962</d>
<d>-0.016169</d>
<d>0.020452</d>
<d>0.020452</d>
<d>0.008245</d>
<d>0.014349</d>
<d>0.014349</d>
<d>0.014349</d>
<d>0.002142</d>
<d>-0.003962</d>
<d>0.002142</d>
<d>0.002142</d>
<d>-0.003962</d>
<d>-0.016169</d>
<d>-0.003962</d>
<d>0.002142</d>
<d>0.002142</d>
<d>0.002142</d>
<d>-0.003962</d>
<d>-0.010065</d>
<d>-0.010065</d>
<d>-0.010065</d>
<d>-0.003962</d>
<d>-0.003962</d>
<d>0.002142</d>
<d>-0.010065</d>
<d>-0.010065</d>
<d>0.002142</d>
<d>0.002142</d>
<d>-0.003962</d>
<d>0.002142</d>
<d>0.002142</d>
<d>0.002142</d>
<d>0.008245</d>
<d>0.002142</d>
<d>-0.003962</d>
<d>-0.010065</d>
<d>-0.016169</d>
<d>-0.016169</d>
<d>-0.003962</d>
<d>-0.003962</d>
<d>-0.003962</d>
<d>-0.010065</d>
<d>-0.016169</d>
<d>-0.010065</d>
<d>-0.003962</d>
<d>-0.016169</d>
<d>-0.010065</d>
<d>-0.010065</d>
<d>-0.016169</d>
<d>-0.016169</d>
<d>-0.010065</d>
<d>-0.010065</d>
<d>-0.016169</d>
<d>-0.010065</d>
<d>0.002142</d>
<d>0.008245</d>
<d>0.014349</d>
<d>0.014349</d>
<d>0.002142</d>
<d>-0.003962</d>
<d>-0.003962</d>
<d>-0.003962</d>
<d>-0.003962</d>
<d>0.002142</d>
<d>0.008245</d>
<d>0.008245</d>
<d>0.002142</d>
<d>-0.003962</d>
<d>0.026556</d>
<d>0.026556</d>
<d>0.026556</d>
<d>0.014349</d>
<d>0.002142</d>
<d>0.008245</d>
<d>0.002142</d>
<d>0.002142</d>
<d>-0.010065</d>
<d>0.002142</d>
<d>-0.003962</d>
<d>0.002142</d>
<d>0.008245</d>
<d>0.014349</d>
<d>0.014349</d>
<d>0.002142</d>
<d>0.008245</d>
<d>0.008245</d>
<d>0.008245</d>
<d>0.002142</d>
<d>-0.010065</d>
<d>-0.003962</d>
<d>0.008245</d>
<d>0.002142</d>
<d>0.002142</d>
<d>0.008245</d>
<d>0.008245</d>
<d>-0.010065</d>
<d>-0.010065</d>
<d>-0.010065</d>
<d>-0.010065</d>
<d>0.014349</d>
<d>0.002142</d>
<d>-0.003962</d>
<d>0.008245</d>
<d>0.008245</d>
<d>0.020452</d>
<d>-0.003962</d>
<d>-0.003962</d>
<d>-0.010065</d>
<d>-0.003962</d>
<d>-0.010065</d>
<d>0.002142</d>
<d>0.002142</d>
<d>-0.010065</d>
<d>0.002142</d>
<d>-0.003962</d>
<d>-0.003962</d>
<d>0.002142</d>
<d>0.002142</d>
<d>0.002142</d>
<d>0.002142</d>
<d>-0.003962</d>
<d>-0.003962</d>
<d>-0.003962</d>
<d>-0.003962</d>
<d>-0.003962</d>
<d>-0.003962</d>
<d>-0.003962</d>
<d>0.002142</d>
<d>0.002142</d>
<d>0.002142</d>
<d>0.008245</d>
<d>0.002142</d>
<d>0.008245</d>
<d>-0.003962</d>
<d>0.008245</d>
<d>-0.003962</d>
<d>0.002142</d>
<d>0.014349</d>
<d>0.020452</d>
<d>0.020452</d>
<d>0.008245</d>
<d>0.008245</d>
<d>0.008245</d>
<d>0.002142</d>
<d>0.008245</d>
<d>0.008245</d>
<d>0.002142</d>
<d>0.020452</d>
<d>0.002142</d>
<d>0.008245</d>
<d>0.008245</d>
<d>0.002142</d>
<d>0.014349</d>
<d>0.014349</d>
<d>0.014349</d>
<d>0.008245</d>
<d>0.008245</d>
<d>0.008245</d>
<d>0.008245</d>
<d>0.008245</d>
<d>0.008245</d>
<d>-0.003962</d>
<d>-0.003962</d>
<d>-0.016169</d>
<d>-0.016169</d>
<d>-0.003962</d>
<d>-0.003962</d>
<d>-0.016169</d>
<d>0.002142</d>
<d>0.002142</d>
<d>-0.003962</d>
<d>0.008245</d>
<d>0.008245</d>
<d>0.008245</d>
<d>-0.003962</d>
<d>-0.003962</d>
<d>0.008245</d>
<d>0.002142</d>
<d>0.008245</d>
<d>0.002142</d>
<d>0.002142</d>
<d>0.014349</d>
<d>0.014349</d>
<d>0.008245</d>
<d>-0.003962</d>
<d>-0.010065</d>
<d>-0.003962</d>
<d>-0.016169</d>
<d>-0.010065</d>
<d>-0.010065</d>
<d>-0.003962</d>
<d>0.008245</d>
<d>0.002142</d>
<d>-0.010065</d>
<d>0.002142</d>
<d>0.014349</d>
<d>0.008245</d>
<d>-0.010065</d>
<d>-0.016169</d>
<d>-0.022272</d>
<d>-0.003962</d>
<d>0.008245</d>
<d>0.014349</d>
<d>0.002142</d>
<d>0.002142</d>
<d>0.002142</d>
<d>-0.003962</d>
<d>-0.016169</d>
<d>-0.010065</d>
<d>0.008245</d>
<d>0.002142</d>
<d>-0.003962</d>
<d>0.002142</d>
<d>-0.016169</d>
<d>-0.016169</d>
<d>-0.022272</d>
<d>-0.010065</d>
<d>0.002142</d>
<d>-0.010065</d>
<d>0.002142</d>
<d>0.008245</d>
<d>0.008245</d>
<d>0.020452</d>
<d>0.020452</d>
<d>0.002142</d>
<d>0.008245</d>
<d>0.002142</d>
<d>-0.003962</d>
<d>0.014349</d>
<d>0.008245</d>
<d>0.008245</d>
<d>0.014349</d>
<d>0.008245</d>
<d>0.008245</d>
<d>0.008245</d>
<d>0.008245</d>
<d>0.008245</d>
<d>0.002142</d>
<d>0.002142</d>
<d>0.008245</d>
<d>-0.003962</d>
<d>-0.003962</d>
<d>-0.003962</d>
<d>-0.010065</d>
<d>-0.016169</d>
<d>-0.016169</d>
<d>-0.016169</d>
<d>-0.003962</d>
<d>-0.003962</d>
<d>-0.016169</d>
<d>-0.003962</d>
<d>-0.010065</d>
<d>-0.016169</d>
<d>-0.010065</d>
<d>-0.010065</d>
<d>-0.003962</d>
<d>-0.003962</d>
<d>-0.016169</d>
<d>-0.022272</d>
<d>-0.016169</d>
<d>-0.022272</d>
<d>-0.022272</d>
<d>-0.016169</d>
<d>-0.010065</d>
<d>0.008245</d>
<d>0.014349</d>
<d>0.020452</d>
<d>0.014349</d>
<d>0.020452</d>
<d>0.026556</d>
<d>0.020452</d>
<d>0.014349</d>
<d>0.020452</d>
<d>0.014349</d>
<d>0.008245</d>
<d>0.002142</d>
<d>-0.010065</d>
<d>-0.00852</d>
<d>-0.02073</d>
<d>-0.01463</d>
<d>-0.01463</d>
<d>-0.00852</d>
<d>-0.00242</d>
<d>0.003682</d>
<d>0.003682</d>
<d>-0.01463</d>
<d>-0.00852</d>
<d>-0.00242</d>
<d>0.003682</d>
<d>0.009785</d>
<d>-0.00242</d>
<d>-0.00852</d>
<d>-0.00852</d>
<d>-0.00852</d>
<d>-0.00852</d>
<d>-0.00852</d>
<d>-0.00852</d>
<d>0.003682</d>
<d>0.003682</d>
<d>-0.00242</d>
<d>0.003682</d>
<d>-0.00852</d>
<d>-0.00242</d>
<d>-0.02073</d>
<d>-0.02073</d>
<d>-0.00852</d>
<d>-0.01463</d>
<d>0.003682</d>
<d>-0.00242</d>
<d>0.003682</d>
<d>0.003682</d>
<d>-0.00242</d>
<d>-0.00242</d>
<d>-0.00852</d>
<d>-0.00852</d>
<d>0.003682</d>
<d>-0.00852</d>
<d>0.003682</d>
<d>0.003682</d>
<d>-0.00242</d>
<d>-0.00242</d>
<d>-0.01463</d>
<d>-0.01463</d>
<d>-0.02073</d>
<d>-0.02684</d>
<d>-0.02073</d>
<d>-0.02073</d>
<d>-0.01463</d>
<d>0.003682</d>
<d>-0.00242</d>
<d>0.003682</d>
<d>0.003682</d>
<d>0.003682</d>
<d>0.015889</d>
<d>0.003682</d>
<d>0.009785</d>
<d>-0.00242</d>
<d>0.003682</d>
<d>-0.00242</d>
<d>-0.00852</d>
<d>0.003682</d>
<d>-0.00242</d>
<d>0.009785</d>
<d>0.003682</d>
<d>-0.00242</d>
<d>-0.00242</d>
<d>-0.00852</d>
<d>-0.00852</d>
<d>0.003682</d>
<d>0.003682</d>
<d>-0.00852</d>
<d>-0.01463</d>
<d>-0.02073</d>
<d>-0.00852</d>
<d>-0.00852</d>
<d>0.003682</d>
<d>0.015889</d>
<d>0.009785</d>
<d>0.015889</d>
<d>-0.00242</d>
<d>-0.00242</d>
<d>0.003682</d>
<d>-0.00242</d>
<d>0.003682</d>
<d>-0.00242</d>
<d>-0.00852</d>
<d>-0.00852</d>
<d>-0.02684</d>
<d>-0.01463</d>
<d>-0.02684</d>
<d>-0.02073</d>
<d>-0.00852</d>
<d>-0.00852</d>
<d>-0.00242</d>
<d>0.003682</d>
<d>-0.00242</d>
<d>0.003682</d>
<d>-0.00242</d>
<d>0.003682</d>
<d>0.003682</d>
<d>-0.00852</d>
<d>-0.00852</d>
<d>-0.02073</d>
<d>-0.00852</d>
<d>-0.00242</d>
<d>0.009785</d>
<d>0.009785</d>
<d>-0.00852</d>
<d>-0.00852</d>
<d>-0.00242</d>
<d>-0.00242</d>
<d>0.003682</d>
<d>0.003682</d>
<d>0.009785</d>
<d>0.009785</d>
<d>-0.00852</d>
<d>-0.01463</d>
<d>-0.02073</d>
<d>-0.02073</d>
<d>-0.01463</d>
<d>-0.01463</d>
<d>-0.00852</d>
<d>-0.00242</d>
<d>0.003682</d>
<d>-0.00242</d>
<d>-0.00852</d>
<d>-0.00852</d>
<d>0.003682</d>
<d>0.003682</d>
<d>0.003682</d>
<d>-0.00852</d>
<d>-0.00242</d>
<d>-0.00242</d>
<d>-0.00852</d>
<d>-0.00242</d>
<d>-0.00242</d>
<d>-0.00242</d>
<d>-0.00242</d>
<d>-0.00242</d>
<d>0.003682</d>
<d>0.003682</d>
<d>0.003682</d>
<d>0.009785</d>
<d>-0.00242</d>
<d>-0.00242</d>
<d>-0.00242</d>
<d>-0.00242</d>
<d>0.003682</d>
<d>0.009785</d>
<d>-0.00242</d>
<d>-0.00242</d>
<d>-0.00242</d>
<d>0.003682</d>
<d>-0.00852</d>
<d>0.003682</d>
<d>0.009785</d>
<d>0.003682</d>
<d>0.003682</d>
<d>-0.00242</d>
<d>0.003682</d>
<d>0.003682</d>
<d>-0.00242</d>
<d>-0.00242</d>
<d>-0.00242</d>
<d>0.003682</d>
<d>0.009785</d>
<d>-0.00242</d>
<d>-0.00242</d>
<d>-0.00852</d>
<d>-0.01463</d>
<d>-0.00242</d>
<d>-0.00242</d>
<d>-0.00242</d>
<d>-0.00242</d>
<d>-0.00852</d>
<d>-0.00242</d>
<d>-0.00242</d>
<d>-0.00852</d>
<d>0.003682</d>
<d>0.009785</d>
<d>0.009785</d>
<d>0.003682</d>
<d>0.009785</d>
<d>0.009785</d>
<d>0.003682</d>
<d>0.003682</d>
<d>-0.00242</d>
<d>-0.00242</d>
<d>0.003682</d>
<d>-0.00242</d>
<d>-0.00852</d>
<d>-0.00242</d>
<d>-0.00242</d>
<d>0.003682</d>
<d>0.003682</d>
<d>0.009785</d>
<d>0.003682</d>
<d>0.003682</d>
<d>0.009785</d>
<d>-0.00242</d>
<d>-0.00852</d>
<d>-0.00242</d>
<d>-0.00242</d>
<d>0.003682</d>
<d>-0.00242</d>
<d>-0.00242</d>
<d>-0.00242</d>
<d>-0.00852</d>
<d>-0.00242</d>
<d>-0.01463</d>
<d>-0.00852</d>
<d>0.003682</d>
<d>0.003682</d>
<d>0.009785</d>
<d>-0.00852</d>
<d>-0.00242</d>
<d>-0.00242</d>
<d>-0.00852</d>
<d>-0.00852</d>
<d>-0.00852</d>
<d>-0.00242</d>
<d>-0.00242</d>
<d>-0.00242</d>
<d>0.009785</d>
<d>0.015889</d>
<d>0.009785</d>
<d>0.021992</d>
<d>0.009785</d>
<d>0.015889</d>
<d>0.009785</d>
<d>0.003682</d>
<d>0.003682</d>
<d>-0.00852</d>
<d>-0.01463</d>
<d>-0.00852</d>
<d>-0.01463</d>
<d>-0.00852</d>
<d>-0.00852</d>
<d>-0.00242</d>
<d>-0.00242</d>
<d>-0.00852</d>
<d>0.003682</d>
<d>-0.00852</d>
<d>-0.00242</d>
<d>0.003682</d>
<d>0.003682</d>
<d>0.003682</d>
<d>0.003682</d>
<d>-0.00242</d>
<d>0.003682</d>
<d>-0.00852</d>
<d>-0.01463</d>
<d>-0.00852</d>
<d>-0.00852</d>
<d>-0.00242</d>
<d>-0.00852</d>
<d>0.003682</d>
<d>0.003682</d>
<d>0.003682</d>
<d>-0.00242</d>
<d>-0.00852</d>
<d>-0.01463</d>
<d>-0.00852</d>
<d>-0.00852</d>
<d>-0.00852</d>
<d>-0.01463</d>
<d>0.003682</d>
<d>0.009785</d>
<d>0.009785</d>
<d>0.003682</d>
<d>-0.00242</d>
<d>0.003682</d>
<d>0.003682</d>
<d>0.009785</d>
<d>0.009785</d>
<d>0.021992</d>
<d>0.015889</d>
<d>0.009785</d>
<d>0.003682</d>
<d>0.003682</d>
<d>0.009785</d>
<d>0.009785</d>
<d>0.003682</d>
<d>-0.00852</d>
<d>-0.00852</d>
<d>-0.00242</d>
<d>0.003682</d>
<d>0.003682</d>
<d>-0.00852</d>
<d>-0.00242</d>
<d>0.003682</d>
<d>0.003682</d>
<d>-0.00242</d>
<d>-0.00242</d>
<d>-0.00852</d>
<d>-0.00242</d>
<d>-0.01463</d>
<d>-0.01463</d>
<d>-0.00242</d>
<d>0.003682</d>
<d>0.003682</d>
<d>-0.00242</d>
<d>0.003682</d>
<d>0.003682</d>
<d>-0.00852</d>
<d>-0.00852</d>
<d>-0.01463</d>
<d>-0.00852</d>
<d>0.003682</d>
<d>0.003682</d>
<d>0.003682</d>
<d>-0.00242</d>
<d>-0.00242</d>
<d>0.009785</d>
<d>0.009785</d>
<d>0.009785</d>
<d>0.021992</d>
<d>0.015889</d>
<d>0.015889</d>
<d>0.015889</d>
<d>0.015889</d>
<d>0.021992</d>
<d>0.009785</d>
<d>0.003682</d>
<d>-0.00852</d>
<d>-0.00852</d>
<d>0.003682</d>
<d>0.003682</d>
<d>0.015889</d>
<d>0.003682</d>
<d>0.003682</d>
<d>0.003682</d>
<d>-0.00852</d>
<d>-0.00242</d>
<d>-0.00852</d>
<d>-0.00242</d>
<d>0.003682</d>
<d>0.003682</d>
<d>0.009785</d>
<d>0.003682</d>
<d>0.003682</d>
<d>-0.01463</d>
<d>-0.02073</d>
<d>-0.02073</d>
<d>-0.01463</d>
<d>-0.00242</d>
<d>0.009785</d>
<d>0.009785</d>
<d>0.009785</d>
<d>0.003682</d>
<d>-0.00852</d>
<d>0.003682</d>
<d>-0.00852</d>
<d>-0.00242</d>
<d>0.003682</d>
<d>0.003682</d>
<d>0.009785</d>
<d>0.003682</d>
<d>0.003682</d>
<d>0.015889</d>
<d>0.009785</d>
<d>0.009785</d>
<d>0.003682</d>
<d>0.003682</d>
<d>0.015889</d>
<d>0.003682</d>
<d>0.009785</d>
<d>0.009785</d>
<d>0.003682</d>
<d>0.015889</d>
<d>0.003682</d>
<d>0.015889</d>
<d>0.009785</d>
<d>0.003682</d>
<d>0.009785</d>
<d>-0.00242</d>
<d>0.009785</d>
<d>0.021992</d>
<d>0.021992</d>
<d>0.015889</d>
<d>-0.00242</d>
<d>0.003682</d>
<d>0.009785</d>
<d>0.003682</d>
<d>0.003682</d>
<d>-0.00852</d>
<d>-0.00852</d>
<d>-0.00242</d>
<d>-0.00852</d>
<d>-0.00242</d>
<d>-0.00242</d>
<d>0.003682</d>
<d>0.009785</d>
<d>0.003682</d>
<d>0.003682</d>
<d>-0.00242</d>
<d>-0.00852</d>
<d>-0.00242</d>
<d>-0.00852</d>
<d>-0.00852</d>
<d>0.003682</d>
<d>-0.00242</d>
<d>0.003682</d>
<d>-0.01463</d>
<d>-0.00852</d>
<d>-0.00242</d>
<d>0.003682</d>
<d>0.009785</d>
<d>-0.00852</d>
<d>-0.00242</d>
<d>-0.00242</d>
<d>-0.00242</d>
<d>-0.00852</d>
<d>-0.00852</d>
<d>-0.00852</d>
<d>0.003682</d>
<d>-0.00852</d>
<d>-0.00242</d>
<d>0.003682</d>
<d>-0.00242</d>
<d>0.003682</d>
<d>-0.00242</d>
<d>0.003682</d>
<d>0.015889</d>
<d>0.015889</d>
<d>0.009785</d>
<d>0.003682</d>
<d>-0.00242</d>
<d>0.003682</d>
<d>-0.00242</d>
<d>-0.00852</d>
<d>-0.02073</d>
<d>-0.01463</d>
<d>-0.00852</d>
<d>-0.00852</d>
<d>-0.00852</d>
<d>-0.01463</d>
<d>-0.00242</d>
<d>0.003682</d>
<d>0.003682</d>
<d>-0.00242</d>
<d>0.003682</d>
<d>-0.00852</d>
<d>-0.00852</d>
<d>-0.01463</d>
<d>-0.00242</d>
<d>-0.00852</d>
<d>-0.00242</d>
<d>0.003682</d>
<d>-0.00852</d>
<d>-0.00242</d>
<d>-0.00242</d>
<d>-0.00852</d>
<d>0.003682</d>
<d>-0.01463</d>
<d>-0.00242</d>
<d>0.003682</d>
<d>0.009785</d>
<d>0.003682</d>
<d>-0.00852</d>
<d>-0.00852</d>
<d>0.003682</d>
<d>0.003682</d>
<d>0.003682</d>
<d>0.003682</d>
<d>0.003682</d>
<d>-0.00242</d>
<d>-0.00852</d>
<d>-0.00242</d>
<d>0.003682</d>
<d>-0.00242</d>
<d>0.003682</d>
<d>-0.00852</d>
<d>-0.00242</d>
<d>0.003682</d>
<d>0.009785</d>
<d>0.009785</d>
<d>-0.00242</d>
<d>0.003682</d>
<d>0.009785</d>
<d>0.015889</d>
<d>0.015889</d>
<d>-0.00242</d>
<d>0.003682</d>
<d>0.003682</d>
<d>-0.00242</d>
<d>-0.00242</d>
<d>-0.00852</d>
<d>-0.01463</d>
<d>-0.01463</d>
<d>-0.02073</d>
<d>-0.01463</d>
<d>-0.00242</d>
<d>-0.00242</d>
<d>0.003682</d>
<d>-0.01463</d>
<d>-0.01463</d>
<d>-0.01463</d>
<d>-0.01463</d>
<d>-0.00852</d>
<d>-0.01463</d>
<d>-0.00852</d>
<d>-0.00852</d>
<d>-0.01463</d>
<d>-0.00852</d>
<d>-0.01463</d>
<d>-0.00852</d>
<d>0.003682</d>
<d>-0.00242</d>
<d>-0.00242</d>
<d>-0.01463</d>
<d>-0.00242</d>
<d>-0.00242</d>
<d>-0.00242</d>
<d>-0.00242</d>
<d>0.003682</d>
<d>0.009785</d>
<d>0.009785</d>
<d>0.003682</d>
<d>-0.00242</d>
<d>0.003682</d>
<d>0.003682</d>
<d>0.009785</d>
<d>-0.00242</d>
<d>-0.00852</d>
<d>0.003682</d>
<d>-0.00852</d>
<d>-0.00242</d>
<d>-0.00852</d>
<d>0.003682</d>
<d>0.015889</d>
<d>0.015889</d>
<d>0.021992</d>
<d>0.009785</d>
<d>0.003682</d>
<d>0.003682</d>
<d>0.003682</d>
<d>-0.00242</d>
<d>-0.00852</d>
<d>-0.00242</d>
<d>-0.00242</d>
<d>-0.00242</d>
<d>-0.00242</d>
<d>0.003682</d>
<d>-0.00242</d>
<d>0.009785</d>
<d>0.003682</d>
<d>0.003682</d>
<d>-0.00242</d>
<d>-0.00242</d>
<d>0.003682</d>
<d>-0.00852</d>
<d>-0.00242</d>
<d>0.003682</d>
<d>0.003682</d>
<d>-0.00242</d>
<d>-0.00852</d>
<d>-0.00242</d>
<d>0.003682</d>
<d>-0.00242</d>
<d>-0.00242</d>
<d>-0.00242</d>
<d>-0.00852</d>
<d>0.003682</d>
<d>-0.00242</d>
<d>-0.00242</d>
<d>-0.00242</d>
<d>-0.01463</d>
<d>-0.00852</d>
<d>-0.01463</d>
<d>-0.00242</d>
<d>0.015889</d>
<d>0.015889</d>
<d>0.015889</d>
<d>-0.00242</d>
<d>-0.00242</d>
<d>0.003682</d>
<d>0.009785</d>
<d>0.015889</d>
<d>0.003682</d>
<d>0.009785</d>
<d>0.021992</d>
<d>0.015889</d>
<d>0.009785</d>
<d>-0.00242</d>
<d>-0.00852</d>
<d>0.003682</d>
<d>0.003682</d>
<d>0.009785</d>
<d>0.003682</d>
<d>0.003682</d>
<d>-0.00242</d>
<d>-0.00852</d>
<d>-0.00242</d>
<d>-0.00242</d>
<d>-0.00242</d>
<d>-0.00242</d>
<d>-0.01463</d>
<d>-0.00852</d>
<d>-0.00242</d>
<d>0.003682</d>
<d>0.009785</d>
<d>0.003682</d>
<d>0.015889</d>
<d>0.021992</d>
<d>0.003682</d>
<d>-0.00242</d>
<d>-0.01463</d>
<d>-0.00852</d>
<d>-0.00852</d>
<d>-0.00242</d>
<d>0.009785</d>
<d>0.003682</d>
<d>-0.00242</d>
<d>-0.00242</d>
<d>-0.00852</d>
<d>-0.00852</d>
<d>-0.00852</d>
<d>-0.00852</d>
<d>-0.00242</d>
<d>-0.01463</d>
<d>-0.00852</d>
<d>-0.00242</d>
<d>-0.00242</d>
<d>-0.00242</d>
<d>-0.00242</d>
<d>0.003682</d>
<d>0.015889</d>
<d>0.003682</d>
<d>0.009785</d>
<d>0.003682</d>
<d>0.009785</d>
<d>0.009785</d>
<d>0.021992</d>
<d>0.015889</d>
<d>0.009785</d>
<d>0.003682</d>
<d>0.003682</d>
<d>-0.00242</d>
<d>-0.00242</d>
<d>-0.00242</d>
<d>-0.00852</d>
<d>0.003682</d>
<d>-0.00242</d>
<d>0.009785</d>
<d>0.003682</d>
<d>0.009785</d>
<d>0.009785</d>
<d>-0.00242</d>
<d>-0.00242</d>
<d>0.003682</d>
<d>0.003682</d>
<d>0.003682</d>
<d>-0.00852</d>
<d>-0.00852</d>
<d>0.003682</d>
<d>0.003682</d>
<d>-0.00242</d>
<d>-0.00852</d>
<d>-0.00852</d>
<d>-0.00242</d>
<d>-0.00242</d>
<d>0.003682</d>
<d>-0.00242</d>
<d>-0.00852</d>
<d>-0.00242</d>
<d>-0.00242</d>
<d>-0.00242</d>
<d>0.009785</d>
<d>-0.00242</d>
<d>-0.00852</d>
<d>-0.02684</d>
<d>-0.00852</d>
<d>-0.00852</d>
<d>-0.00242</d>
<d>-0.00242</d>
<d>-0.00242</d>
<d>0.003682</d>
<d>0.009785</d>
<d>0.003682</d>
<d>0.003682</d>
<d>-0.00852</d>
<d>-0.00242</d>
<d>-0.00242</d>
<d>-0.00242</d>
<d>-0.00242</d>
<d>0.003682</d>
<d>0.003682</d>
<d>0.009785</d>
<d>0.009785</d>
<d>0.003682</d>
<d>-0.00242</d>
<d>-0.00242</d>
<d>0.003682</d>
<d>-0.00852</d>
<d>-0.00852</d>
<d>-0.00852</d>
<d>-0.00852</d>
<d>-0.00242</d>
<d>-0.02073</d>
<d>-0.00242</d>
<d>-0.00242</d>
<d>-0.00242</d>
<d>0.003682</d>
<d>0.003682</d>
<d>0.009785</d>
<d>0.009785</d>
<d>0.003682</d>
<d>0.009785</d>
<d>-0.00242</d>
<d>0.003682</d>
<d>0.009785</d>
<d>0.009785</d>
<d>0.009785</d>
<d>0.015889</d>
<d>0.015889</d>
<d>0.015889</d>
<d>0.009785</d>
<d>0.009785</d>
<d>0.015889</d>
<d>0.009785</d>
<d>0.021992</d>
<d>0.003682</d>
<d>0.003682</d>
<d>0.003682</d>
<d>-0.00242</d>
<d>-0.00242</d>
<d>-0.00852</d>
<d>-0.00852</d>
<d>0.009785</d>
<d>0.009785</d>
<d>0.015889</d>
<d>0.009785</d>
<d>0.003682</d>
<d>0.003682</d>
<d>-0.00852</d>
<d>-0.00242</d>
<d>0.003682</d>
<d>0.003682</d>
<d>0.009785</d>
<d>0.003682</d>
<d>0.003682</d>
<d>0.009785</d>
<d>-0.00242</d>
<d>0.003682</d>
<d>-0.00242</d>
<d>-0.00852</d>
<d>-0.00242</d>
<d>-0.00242</d>
<d>0.003682</d>
<d>-0.00852</d>
<d>0.003682</d>
<d>-0.00242</d>
<d>-0.00852</d>
<d>-0.00242</d>
<d>-0.01463</d>
<d>-0.00242</d>
<d>-0.00852</d>
<d>-0.00852</d>
<d>-0.00852</d>
<d>-0.00852</d>
<d>-0.01463</d>
<d>-0.00242</d>
<d>-0.01463</d>
<d>-0.00852</d>
<d>-0.00242</d>
<d>-0.00242</d>
<d>-0.00242</d>
<d>-0.00852</d>
<d>-0.00242</d>
<d>0.003682</d>
<d>-0.00242</d>
<d>0.003682</d>
<d>-0.00852</d>
<d>-0.00242</d>
<d>-0.00242</d>
<d>0.003682</d>
<d>-0.00242</d>
<d>-0.01463</d>
<d>-0.00242</d>
<d>0.003682</d>
<d>0.003682</d>
<d>0.015889</d>
<d>0.003682</d>
<d>-0.00242</d>
<d>-0.00242</d>
<d>-0.00242</d>
<d>-0.00242</d>
<d>-0.00242</d>
<d>-0.01463</d>
<d>-0.02073</d>
<d>-0.01463</d>
<d>-0.02073</d>
<d>-0.00852</d>
<d>-0.01463</d>
<d>-0.00242</d>
<d>-0.01463</d>
<d>-0.00242</d>
<d>-0.00852</d>
<d>0.040303</d>
<d>0.180684</d>
<d>0.308857</d>
<d>0.369893</d>
<d>0.308857</d>
<d>0.125752</d>
<d>-0.05735</d>
<d>-0.1367</d>
<d>-0.12449</d>
<d>-0.07566</d>
<d>-0.03294</d>
<d>-0.02684</d>
<d>-0.02073</d>
<d>-0.02684</d>
<d>-0.02073</d>
<d>-0.03294</d>
<d>-0.03294</d>
<d>-0.02684</d>
<d>-0.02073</d>
<d>-0.00852</d>
<d>-0.02073</d>
<d>-0.01463</d>
<d>0.003682</d>
<d>0.003682</d>
<d>-0.00242</d>
<d>-0.02073</d>
<d>-0.00852</d>
<d>-0.00852</d>
<d>-0.00242</d>
<d>-0.00242</d>
<d>-0.00852</d>
<d>-0.00242</d>
<d>-0.00852</d>
<d>-0.00852</d>
<d>0.003682</d>
<d>-0.00242</d>
<d>-0.01463</d>
<d>-0.01463</d>
<d>-0.00852</d>
<d>-0.00852</d>
<d>-0.00852</d>
<d>-0.00852</d>
<d>0.003682</d>
<d>-0.00852</d>
<d>-0.00852</d>
<d>-0.00852</d>
<d>-0.00852</d>
<d>0.003682</d>
<d>-0.01463</d>
<d>-0.00852</d>
<d>0.003682</d>
<d>0.003682</d>
<d>0.009785</d>
<d>0.003682</d>
<d>0.009785</d>
<d>0.021992</d>
<d>0.009785</d>
<d>0.015889</d>
<d>0.015889</d>
<d>0.009785</d>
<d>0.009785</d>
<d>-0.00852</d>
<d>-0.00852</d>
<d>-0.00852</d>
<d>-0.00852</d>
<d>-0.00242</d>
<d>-0.01463</d>
<d>-0.02073</d>
<d>-0.01463</d>
<d>-0.00852</d>
<d>-0.00242</d>
<d>-0.00852</d>
<d>-0.00852</d>
<d>-0.00852</d>
<d>-0.01463</d>
<d>-0.00852</d>
<d>-0.02684</d>
<d>-0.01463</d>
<d>-0.01463</d>
<d>-0.02073</d>
<d>-0.01463</d>
<d>-0.02073</d>
<d>-0.02073</d>
<d>-0.01463</d>
<d>-0.02073</d>
<d>-0.01463</d>
<d>-0.02684</d>
<d>-0.02684</d>
<d>-0.01463</d>
<d>-0.01463</d>
<d>-0.00242</d>
<d>0.003682</d>
<d>-0.00242</d>
<d>-0.00852</d>
<d>-0.03294</d>
<d>-0.03904</d>
<d>-0.02684</d>
<d>-0.02073</d>
<d>-0.01463</d>
<d>-0.02073</d>
<d>-0.02073</d>
<d>-0.01463</d>
<d>-0.02073</d>
<d>-0.01463</d>
<d>-0.02684</d>
<d>-0.02073</d>
<d>-0.01463</d>
<d>-0.01463</d>
<d>-0.01463</d>
<d>-0.02684</d>
<d>-0.02073</d>
<d>-0.00852</d>
<d>-0.02073</d>
<d>-0.01463</d>
<d>-0.00852</d>
<d>-0.00852</d>
<d>-0.00242</d>
<d>-0.00852</d>
<d>-0.01463</d>
<d>-0.02073</d>
<d>-0.02684</d>
<d>-0.02073</d>
<d>-0.02684</d>
<d>-0.02073</d>
<d>-0.00852</d>
<d>-0.02073</d>
<d>-0.02073</d>
<d>-0.02684</d>
<d>-0.02684</d>
<d>-0.01463</d>
<d>-0.02073</d>
<d>-0.02073</d>
<d>-0.02684</d>
<d>-0.02684</d>
<d>-0.01463</d>
<d>-0.01463</d>
<d>-0.02073</d>
<d>-0.02684</d>
<d>-0.02684</d>
<d>-0.02684</d>
<d>-0.02684</d>
<d>-0.02684</d>
<d>-0.02684</d>
<d>-0.03294</d>
<d>-0.03294</d>
<d>-0.04515</d>
<d>-0.03904</d>
<d>-0.03904</d>
<d>-0.05125</d>
<d>-0.03904</d>
<d>-0.04515</d>
<d>-0.03294</d>
<d>-0.02684</d>
<d>-0.03294</d>
<d>-0.03294</d>
<d>-0.04515</d>
<d>-0.04515</d>
<d>-0.03294</d>
<d>-0.03904</d>
<d>-0.03294</d>
<d>-0.05125</d>
<d>-0.05125</d>
<d>-0.04515</d>
<d>-0.04515</d>
<d>-0.04515</d>
<d>-0.04515</d>
<d>-0.03904</d>
<d>-0.04515</d>
<d>-0.05735</d>
<d>-0.05125</d>
<d>-0.05125</d>
<d>-0.05735</d>
<d>-0.05125</d>
<d>-0.06346</d>
<d>-0.05125</d>
<d>-0.04515</d>
<d>-0.05125</d>
<d>-0.05125</d>
<d>-0.06346</d>
<d>-0.06346</d>
<d>-0.05125</d>
<d>-0.03904</d>
<d>-0.03904</d>
<d>-0.04515</d>
<d>-0.03904</d>
<d>-0.03904</d>
<d>-0.04515</d>
<d>-0.05125</d>
<d>-0.05735</d>
<d>-0.05735</d>
<d>-0.06346</d>
<d>-0.07566</d>
<d>-0.06956</d>
<d>-0.06956</d>
<d>-0.06956</d>
<d>-0.06346</d>
<d>-0.06956</d>
<d>-0.06346</d>
<d>-0.05125</d>
<d>-0.06346</d>
<d>-0.05125</d>
<d>-0.06346</d>
<d>-0.05735</d>
<d>-0.04515</d>
<d>-0.04515</d>
<d>-0.05125</d>
<d>-0.06346</d>
<d>-0.06956</d>
<d>-0.05735</d>
<d>-0.06346</d>
<d>-0.05125</d>
<d>-0.05125</d>
<d>-0.06346</d>
<d>-0.06346</d>
<d>-0.06956</d>
<d>-0.06956</d>
<d>-0.06956</d>
<d>-0.07566</d>
<d>-0.06956</d>
<d>-0.05735</d>
<d>-0.05735</d>
<d>-0.03294</d>
<d>-0.04515</d>
<d>-0.03904</d>
<d>-0.04515</d>
<d>-0.04515</d>
<d>-0.03904</d>
<d>-0.04515</d>
<d>-0.04515</d>
<d>-0.06346</d>
<d>-0.05125</d>
<d>-0.05735</d>
<d>-0.06956</d>
<d>-0.06956</d>
<d>-0.06956</d>
<d>-0.05735</d>
<d>-0.05125</d>
<d>-0.05125</d>
<d>-0.04515</d>
<d>-0.04515</d>
<d>-0.05735</d>
<d>-0.05125</d>
<d>-0.05735</d>
<d>-0.06346</d>
<d>-0.04515</d>
<d>-0.04515</d>
<d>-0.05125</d>
<d>-0.06346</d>
<d>-0.06346</d>
<d>-0.05735</d>
<d>-0.05735</d>
<d>-0.05125</d>
<d>-0.05735</d>
<d>-0.05125</d>
<d>-0.04515</d>
<d>-0.04515</d>
<d>-0.04515</d>
<d>-0.05125</d>
<d>-0.05125</d>
<d>-0.05125</d>
<d>-0.05735</d>
<d>-0.04515</d>
<d>-0.04515</d>
<d>-0.04515</d>
<d>-0.05125</d>
<d>-0.05735</d>
<d>-0.06346</d>
<d>-0.06346</d>
<d>-0.06346</d>
<d>-0.05735</d>
<d>-0.07566</d>
<d>-0.06956</d>
<d>-0.05735</d>
<d>-0.06346</d>
<d>-0.05125</d>
<d>-0.06346</d>
<d>-0.05125</d>
<d>-0.04515</d>
<d>-0.04515</d>
<d>-0.03294</d>
<d>-0.05125</d>
<d>-0.05125</d>
<d>-0.05125</d>
<d>-0.05125</d>
<d>-0.05125</d>
<d>-0.05125</d>
<d>-0.05735</d>
<d>-0.05125</d>
<d>-0.05125</d>
<d>-0.05125</d>
<d>-0.03904</d>
<d>-0.04515</d>
<d>-0.03294</d>
<d>-0.05125</d>
<d>-0.04515</d>
<d>-0.03904</d>
<d>-0.03904</d>
<d>-0.03294</d>
<d>-0.05125</d>
<d>-0.04515</d>
<d>-0.04515</d>
<d>-0.05125</d>
<d>-0.05125</d>
<d>-0.05735</d>
<d>-0.05735</d>
<d>-0.03904</d>
<d>-0.03904</d>
<d>-0.03904</d>
<d>-0.03904</d>
<d>-0.03904</d>
<d>-0.03904</d>
<d>-0.04515</d>
<d>-0.02684</d>
<d>-0.02684</d>
<d>-0.03294</d>
<d>-0.02684</d>
<d>-0.04515</d>
<d>-0.03904</d>
<d>-0.03904</d>
<d>-0.04515</d>
<d>-0.04515</d>
<d>-0.05125</d>
<d>-0.03294</d>
<d>-0.03294</d>
<d>-0.03904</d>
<d>-0.03294</d>
<d>-0.03904</d>
<d>-0.02684</d>
<d>-0.02073</d>
<d>-0.03294</d>
<d>-0.03294</d>
<d>-0.04515</d>
<d>-0.05735</d>
<d>-0.05735</d>
<d>-0.05735</d>
<d>-0.05125</d>
<d>-0.04515</d>
<d>-0.04515</d>
<d>-0.04515</d>
<d>-0.05735</d>
<d>-0.05735</d>
<d>-0.05735</d>
<d>-0.05735</d>
<d>-0.05125</d>
<d>-0.05735</d>
<d>-0.03904</d>
<d>-0.03904</d>
<d>-0.03294</d>
<d>-0.03904</d>
<d>-0.04515</d>
<d>-0.05125</d>
<d>-0.04515</d>
<d>-0.03904</d>
<d>-0.03904</d>
<d>-0.03904</d>
<d>-0.03294</d>
<d>-0.02684</d>
<d>-0.02684</d>
<d>-0.02684</d>
<d>-0.03904</d>
<d>-0.04515</d>
<d>-0.04515</d>
<d>-0.03904</d>
<d>-0.03294</d>
<d>-0.03294</d>
<d>-0.03294</d>
<d>-0.03294</d>
<d>-0.03904</d>
<d>-0.03904</d>
<d>-0.02684</d>
<d>-0.02684</d>
<d>-0.02684</d>
<d>-0.04515</d>
<d>-0.04515</d>
<d>-0.03294</d>
<d>-0.03904</d>
<d>-0.03904</d>
<d>-0.03904</d>
<d>-0.03294</d>
<d>-0.03294</d>
<d>-0.03904</d>
<d>-0.03294</d>
<d>-0.02684</d>
<d>-0.03294</d>
<d>-0.03294</d>
<d>-0.03294</d>
<d>-0.03294</d>
<d>-0.02073</d>
<d>-0.02684</d>
<d>-0.02684</d>
<d>-0.03294</d>
<d>-0.03904</d>
<d>-0.03294</d>
<d>-0.03294</d>
<d>-0.03294</d>
<d>-0.03904</d>
<d>-0.02684</d>
<d>-0.02684</d>
<d>-0.02684</d>
<d>-0.02684</d>
<d>-0.03294</d>
<d>-0.03294</d>
<d>-0.02684</d>
<d>-0.03294</d>
<d>-0.03294</d>
<d>-0.03294</d>
<d>-0.03294</d>
<d>-0.03294</d>
<d>-0.03904</d>
<d>-0.03294</d>
<d>-0.03294</d>
<d>-0.03294</d>
<d>-0.03904</d>
<d>-0.05125</d>
<d>-0.05125</d>
<d>-0.03904</d>
<d>-0.03904</d>
<d>-0.02684</d>
<d>-0.02073</d>
<d>-0.02073</d>
<d>-0.02073</d>
<d>-0.02684</d>
<d>-0.02684</d>
<d>-0.03904</d>
<d>-0.02684</d>
<d>-0.01463</d>
<d>-0.02073</d>
<d>-0.02073</d>
<d>-0.02684</d>
<d>-0.03294</d>
<d>-0.03904</d>
<d>-0.03294</d>
<d>-0.03294</d>
<d>-0.03294</d>
<d>-0.03904</d>
<d>-0.03294</d>
<d>-0.03294</d>
<d>-0.02684</d>
<d>-0.02073</d>
<d>-0.02073</d>
<d>-0.02073</d>
<d>-0.02684</d>
<d>-0.02073</d>
<d>-0.00852</d>
<d>-0.00852</d>
<d>-0.00852</d>
<d>-0.01463</d>
<d>-0.02684</d>
<d>-0.01463</d>
<d>-0.02073</d>
<d>-0.01463</d>
<d>-0.02684</d>
<d>-0.02684</d>
<d>-0.03904</d>
<d>-0.03294</d>
<d>-0.03294</d>
<d>-0.03904</d>
<d>-0.02684</d>
<d>-0.01463</d>
<d>-0.01463</d>
<d>-0.01463</d>
<d>-0.00852</d>
<d>-0.00852</d>
<d>-0.01463</d>
<d>-0.02073</d>
<d>-0.02073</d>
<d>-0.02073</d>
<d>-0.02684</d>
<d>-0.02684</d>
<d>-0.03904</d>
<d>-0.02684</d>
<d>-0.02073</d>
<d>-0.02684</d>
<d>-0.02073</d>
<d>-0.03294</d>
<d>-0.02684</d>
<d>-0.02073</d>
<d>-0.02684</d>
<d>-0.02684</d>
<d>-0.02684</d>
<d>-0.02073</d>
<d>-0.00852</d>
<d>-0.00852</d>
<d>-0.01463</d>
<d>-0.02073</d>
<d>-0.02684</d>
<d>-0.02073</d>
<d>-0.02684</d>
<d>-0.02073</d>
<d>-0.02684</d>
<d>-0.03294</d>
<d>-0.02684</d>
<d>-0.02684</d>
<d>-0.01463</d>
<d>-0.00852</d>
<d>-0.01463</d>
<d>-0.00852</d>
<d>-0.02073</d>
<d>-0.02073</d>
<d>-0.01463</d>
<d>-0.02073</d>
<d>-0.02073</d>
<d>-0.03294</d>
<d>-0.02684</d>
<d>-0.02684</d>
<d>-0.02684</d>
<d>-0.02073</d>
<d>-0.02684</d>
<d>-0.02684</d>
<d>-0.02073</d>
<d>-0.02684</d>
<d>-0.02684</d>
<d>-0.02684</d>
<d>-0.02073</d>
<d>-0.00242</d>
<d>-0.00242</d>
<d>-0.00242</d>
<d>0.009785</d>
<d>-0.00242</d>
<d>-0.01463</d>
<d>-0.02684</d>
<d>-0.02684</d>
<d>-0.02073</d>
<d>-0.02073</d>
<d>-0.02073</d>
<d>-0.02684</d>
<d>-0.02684</d>
<d>-0.02073</d>
<d>-0.02073</d>
<d>-0.00852</d>
<d>-0.01463</d>
<d>-0.02073</d>
<d>-0.02073</d>
<d>-0.02684</d>
<d>-0.01463</d>
<d>-0.02073</d>
<d>-0.01463</d>
<d>-0.01463</d>
<d>-0.02684</d>
<d>-0.02073</d>
<d>-0.02073</d>
<d>-0.02684</d>
<d>-0.02684</d>
<d>-0.02684</d>
<d>-0.02073</d>
<d>-0.00852</d>
<d>-0.01463</d>
<d>-0.01463</d>
<d>-0.02684</d>
<d>-0.02684</d>
<d>-0.02073</d>
<d>-0.02684</d>
<d>-0.02684</d>
<d>-0.03904</d>
<d>-0.03294</d>
<d>-0.01463</d>
<d>-0.00852</d>
<d>-0.00852</d>
<d>-0.01463</d>
<d>-0.02073</d>
<d>-0.01463</d>
<d>-0.02684</d>
<d>-0.01463</d>
<d>-0.01463</d>
<d>-0.01463</d>
<d>-0.01463</d>
<d>-0.02073</d>
<d>-0.00852</d>
<d>-0.00242</d>
<d>-0.00852</d>
<d>-0.01463</d>
<d>-0.02684</d>
<d>-0.02073</d>
<d>-0.01463</d>
<d>-0.00852</d>
<d>-0.00852</d>
<d>-0.00852</d>
<d>-0.00242</d>
<d>-0.00242</d>
<d>-0.00242</d>
<d>-0.00852</d>
<d>-0.00852</d>
<d>-0.00852</d>
<d>-0.00852</d>
<d>-0.01463</d>
<d>-0.02073</d>
<d>-0.01463</d>
<d>-0.01463</d>
<d>-0.00242</d>
<d>-0.01463</d>
<d>-0.00242</d>
<d>-0.00852</d>
<d>-0.01463</d>
<d>-0.01463</d>
<d>-0.02684</d>
<d>-0.01463</d>
<d>-0.01463</d>
<d>-0.01463</d>
<d>-0.02073</d>
<d>-0.02684</d>
<d>-0.02684</d>
<d>-0.00852</d>
<d>-0.02073</d>
<d>-0.00852</d>
<d>-0.02684</d>
<d>-0.02684</d>
<d>-0.01463</d>
<d>-0.01463</d>
<d>-0.02073</d>
<d>-0.02684</d>
<d>-0.02073</d>
<d>-0.00852</d>
<d>-0.00852</d>
<d>-0.00852</d>
<d>-0.01463</d>
<d>-0.01463</d>
<d>-0.01463</d>
<d>-0.02684</d>
<d>-0.02073</d>
<d>-0.02073</d>
<d>-0.02684</d>
<d>-0.03294</d>
<d>-0.03904</d>
<d>-0.02684</d>
<d>-0.01463</d>
<d>-0.01463</d>
<d>-0.00242</d>
<d>-0.00852</d>
<d>-0.00852</d>
<d>-0.00242</d>
<d>-0.01463</d>
<d>-0.01463</d>
<d>-0.02684</d>
<d>-0.02684</d>
<d>-0.01463</d>
<d>-0.02073</d>
<d>-0.02684</d>
<d>-0.02073</d>
<d>-0.01463</d>
<d>-0.00852</d>
<d>-0.02073</d>
<d>-0.02073</d>
<d>-0.00852</d>
<d>-0.00852</d>
<d>-0.00242</d>
<d>-0.00242</d>
<d>-0.00852</d>
<d>-0.00242</d>
<d>-0.00242</d>
<d>-0.00852</d>
<d>-0.00852</d>
<d>-0.00242</d>
<d>-0.00242</d>
<d>-0.01463</d>
<d>-0.00242</d>
<d>-0.00852</d>
<d>-0.00852</d>
<d>-0.00242</d>
<d>-0.01463</d>
<d>-0.02073</d>
<d>-0.01463</d>
<d>-0.01463</d>
<d>-0.01463</d>
<d>-0.02073</d>
<d>-0.02073</d>
<d>-0.01463</d>
<d>-0.00852</d>
<d>-0.00242</d>
<d>-0.00852</d>
<d>0.003682</d>
<d>0.009785</d>
<d>0.003682</d>
<d>-0.00242</d>
<d>-0.00852</d>
<d>-0.00852</d>
<d>-0.00852</d>
<d>-0.02073</d>
<d>-0.01463</d>
<d>-0.00852</d>
<d>-0.00852</d>
<d>0.003682</d>
<d>-0.00242</d>
<d>-0.00242</d>
<d>-0.00852</d>
<d>-0.01463</d>
<d>-0.01463</d>
<d>-0.02684</d>
<d>-0.02684</d>
<d>-0.01463</d>
<d>-0.02073</d>
<d>-0.00852</d>
<d>-0.00852</d>
<d>-0.00852</d>
<d>-0.00242</d>
<d>-0.00852</d>
<d>-0.00242</d>
<d>-0.00852</d>
<d>-0.00242</d>
<d>-0.00242</d>
<d>-0.01463</d>
<d>-0.01463</d>
<d>-0.02073</d>
<d>-0.00852</d>
<d>-0.00852</d>
<d>-0.00852</d>
<d>-0.00242</d>
<d>-0.01463</d>
<d>-0.01463</d>
<d>-0.01463</d>
<d>-0.02684</d>
<d>-0.02073</d>
<d>-0.00852</d>
<d>-0.00852</d>
<d>0.003682</d>
<d>-0.00242</d>
<d>-0.00852</d>
<d>-0.00242</d>
<d>-0.00242</d>
<d>-0.00242</d>
<d>-0.02073</d>
<d>-0.01463</d>
<d>0.003682</d>
<d>0.003682</d>
<d>0.003682</d>
<d>-0.00242</d>
<d>-0.00242</d>
<d>0.003682</d>
<d>-0.00242</d>
<d>-0.01463</d>
<d>-0.01463</d>
<d>-0.01463</d>
<d>-0.00852</d>
<d>-0.00242</d>
<d>0.003682</d>
<d>0.003682</d>
<d>0.003682</d>
<d>0.009785</d>
<d>-0.00852</d>
<d>-0.00242</d>
<d>0.009785</d>
<d>-0.00242</d>
<d>-0.00242</d>
<d>-0.00852</d>
<d>-0.00242</d>
<d>0.003682</d>
<d>-0.01463</d>
<d>-0.00242</d>
<d>-0.02073</d>
<d>-0.01463</d>
<d>-0.01463</d>
<d>-0.02073</d>
<d>-0.00852</d>
<d>-0.00852</d>
<d>-0.00852</d>
<d>0.003682</d>
<d>0.009785</d>
<d>0.009785</d>
<d>0.009785</d>
<d>0.003682</d>
<d>-0.00242</d>
<d>-0.02073</d>
<d>-0.02073</d>
<d>-0.00852</d>
<d>-0.01463</d>
<d>-0.00852</d>
<d>-0.01463</d>
<d>-0.00242</d>
<d>0.003682</d>
<d>-0.00242</d>
<d>-0.00242</d>
<d>-0.00852</d>
<d>-0.00852</d>
<d>-0.00852</d>
<d>-0.02073</d>
<d>-0.01463</d>
<d>-0.02684</d>
<d>-0.01463</d>
<d>-0.00852</d>
<d>-0.00852</d>
<d>-0.00242</d>
<d>-0.00242</d>
<d>-0.00852</d>
<d>-0.00852</d>
<d>-0.00852</d>
<d>-0.00242</d>
<d>-0.00242</d>
<d>-0.00852</d>
<d>-0.00852</d>
<d>-0.02073</d>
<d>-0.01463</d>
<d>-0.00852</d>
<d>-0.00852</d>
<d>-0.00852</d>
<d>-0.02073</d>
<d>-0.00852</d>
<d>-0.00242</d>
<d>0.003682</d>
<d>0.003682</d>
<d>-0.01463</d>
<d>-0.02684</d>
<d>-0.01463</d>
<d>-0.00852</d>
<d>-0.00852</d>
<d>-0.00852</d>
<d>-0.00242</d>
<d>-0.01463</d>
<d>-0.02073</d>
<d>-0.01463</d>
<d>-0.01463</d>
<d>-0.01463</d>
<d>-0.00242</d>
<d>-0.00852</d>
<d>-0.01463</d>
<d>-0.01463</d>
<d>-0.02684</d>
<d>-0.02073</d>
<d>-0.02684</d>
<d>-0.01463</d>
<d>-0.00852</d>
<d>-0.00852</d>
<d>-0.00852</d>
<d>-0.02073</d>
<d>-0.02073</d>
<d>-0.00852</d>
<d>-0.02073</d>
<d>-0.00852</d>
<d>-0.01463</d>
<d>-0.01463</d>
<d>-0.00242</d>
<d>-0.00852</d>
<d>-0.00852</d>
<d>-0.00852</d>
<d>-0.01463</d>
<d>-0.00242</d>
<d>-0.01463</d>
<d>-0.01463</d>
<d>-0.00852</d>
<d>-0.01463</d>
<d>-0.00852</d>
<d>-0.02684</d>
<d>-0.01463</d>
<d>-0.00242</d>
<d>-0.00242</d>
<d>-0.00852</d>
<d>-0.01463</d>
<d>-0.01463</d>
<d>0.003682</d>
<d>-0.01463</d>
<d>-0.00852</d>
<d>-0.02073</d>
<d>-0.01463</d>
<d>-0.00852</d>
<d>-0.00242</d>
<d>-0.00242</d>
<d>-0.00852</d>
<d>-0.01463</d>
<d>-0.00242</d>
<d>0.003682</d>
<d>-0.00242</d>
<d>-0.00242</d>
<d>-0.01463</d>
<d>-0.01463</d>
<d>-0.02684</d>
<d>-0.02684</d>
<d>-0.00852</d>
<d>-0.01463</d>
<d>-0.00242</d>
<d>-0.00852</d>
<d>-0.00242</d>
<d>0.003682</d>
<d>-0.00242</d>
<d>-0.00242</d>
<d>-0.01463</d>
<d>-0.02073</d>
<d>-0.02073</d>
<d>-0.01463</d>
<d>-0.00852</d>
<d>-0.00852</d>
<d>-0.00242</d>
<d>-0.00242</d>
<d>-0.00852</d>
<d>-0.00242</d>
<d>-0.00242</d>
<d>-0.00242</d>
<d>-0.00852</d>
<d>-0.02073</d>
<d>-0.01463</d>
<d>-0.01463</d>
<d>-0.01463</d>
<d>-0.00852</d>
<d>-0.01463</d>
<d>-0.00242</d>
<d>-0.00242</d>
<d>-0.00852</d>
<d>-0.00852</d>
<d>-0.02073</d>
<d>-0.01463</d>
<d>-0.00852</d>
<d>-0.00242</d>
<d>0.003682</d>
<d>-0.00242</d>
<d>-0.01463</d>
<d>-0.01463</d>
<d>-0.01463</d>
<d>-0.00852</d>
<d>-0.01463</d>
<d>-0.00852</d>
<d>-0.00242</d>
<d>-0.01463</d>
<d>-0.01463</d>
<d>-0.00242</d>
<d>-0.00852</d>
<d>-0.00852</d>
<d>-0.02073</d>
<d>-0.00852</d>
<d>-0.00242</d>
<d>-0.02073</d>
<d>-0.02684</d>
<d>-0.03294</d>
<d>-0.02073</d>
<d>-0.01463</d>
<d>-0.01463</d>
<d>-0.02073</d>
<d>-0.02684</d>
<d>-0.02684</d>
<d>-0.02684</d>
<d>-0.02073</d>
<d>-0.01463</d>
<d>-0.01463</d>
<d>-0.00852</d>
<d>-0.00852</d>
<d>-0.00242</d>
<d>-0.00852</d>
<d>-0.00852</d>
<d>-0.02073</d>
<d>-0.02073</d>
<d>-0.02073</d>
<d>-0.00242</d>
<d>0.009785</d>
<d>0.009785</d>
<d>0.015889</d>
<d>-0.00852</d>
<d>0.003682</d>
<d>0.003682</d>
<d>0.003682</d>
<d>-0.00242</d>
<d>-0.00852</d>
<d>-0.00242</d>
<d>0.003682</d>
<d>0.003682</d>
<d>-0.00242</d>
<d>-0.02073</d>
<d>-0.02073</d>
<d>-0.00852</d>
<d>-0.02073</d>
<d>-0.00852</d>
<d>-0.01463</d>
<d>-0.02073</d>
<d>-0.00852</d>
<d>-0.02073</d>
<d>-0.01463</d>
<d>-0.00852</d>
<d>-0.00852</d>
<d>-0.00852</d>
<d>-0.02684</d>
<d>-0.02684</d>
<d>-0.02073</d>
<d>-0.01463</d>
<d>-0.00852</d>
<d>-0.01463</d>
<d>-0.01463</d>
<d>-0.00242</d>
<d>0.003682</d>
<d>0.009785</d>
<d>-0.00242</d>
<d>-0.00242</d>
<d>0.003682</d>
<d>0.003682</d>
<d>0.003682</d>
<d>-0.00242</d>
<d>-0.00242</d>
<d>0.003682</d>
<d>-0.01463</d>
<d>-0.01463</d>
<d>-0.00852</d>
<d>-0.02073</d>
<d>-0.00242</d>
<d>-0.01463</d>
<d>-0.00852</d>
<d>-0.00242</d>
<d>-0.00242</d>
<d>-0.00852</d>
<d>-0.01463</d>
<d>-0.00242</d>
<d>0.009785</d>
<d>0.009785</d>
<d>0.009785</d>
<d>0.003682</d>
<d>0.003682</d>
<d>0.003682</d>
<d>-0.00852</d>
<d>-0.00852</d>
<d>-0.01463</d>
<d>-0.00852</d>
<d>-0.00852</d>
<d>-0.00242</d>
<d>-0.00852</d>
<d>-0.00852</d>
<d>-0.01463</d>
<d>0.009785</d>
<d>0.009785</d>
<d>0.015889</d>
<d>0.009785</d>
<d>-0.00242</d>
<d>-0.00242</d>
<d>-0.00852</d>
<d>-0.00852</d>
<d>0.003682</d>
<d>0.003682</d>
<d>0.003682</d>
<d>-0.00242</d>
<d>0.003682</d>
<d>0.009785</d>
<d>0.015889</d>
<d>0.009785</d>
<d>-0.00242</d>
<d>-0.00852</d>
<d>0.003682</d>
<d>-0.00852</d>
<d>-0.00852</d>
<d>-0.00852</d>
<d>-0.01463</d>
<d>-0.00852</d>
<d>-0.01463</d>
<d>-0.00852</d>
<d>-0.00242</d>
<d>-0.00242</d>
<d>0.003682</d>
<d>-0.01463</d>
<d>-0.01463</d>
<d>-0.01463</d>
<d>-0.01463</d>
<d>-0.00852</d>
<d>-0.00852</d>
<d>0.003682</d>
<d>0.015889</d>
<d>0.009785</d>
<d>0.009785</d>
<d>-0.00242</d>
<d>-0.00242</d>
<d>0.003682</d>
<d>-0.00242</d>
<d>-0.00242</d>
<d>-0.00242</d>
<d>-0.00852</d>
<d>0.003682</d>
<d>-0.00852</d>
<d>-0.00242</d>
<d>0.009785</d>
<d>0.003682</d>
<d>0.015889</d>
<d>-0.00242</d>
<d>-0.00242</d>
<d>-0.00852</d>
<d>-0.01463</d>
<d>-0.00852</d>
<d>-0.00852</d>
<d>-0.00242</d>
<d>0.009785</d>
<d>0.003682</d>
<d>0.003682</d>
<d>-0.00852</d>
<d>-0.00852</d>
<d>-0.00242</d>
<d>-0.00852</d>
<d>-0.00242</d>
<d>-0.00242</d>
<d>-0.00242</d>
<d>-0.00242</d>
<d>-0.00242</d>
<d>-0.00852</d>
<d>-0.00242</d>
<d>-0.00242</d>
<d>0.003682</d>
<d>0.009785</d>
<d>-0.00242</d>
<d>-0.00242</d>
<d>-0.01463</d>
<d>-0.02073</d>
<d>-0.03294</d>
<d>-0.02073</d>
<d>-0.00852</d>
<d>-0.00852</d>
<d>-0.00242</d>
<d>-0.00852</d>
<d>0.003682</d>
<d>0.009785</d>
<d>0.003682</d>
<d>0.003682</d>
<d>-0.00242</d>
<d>-0.00242</d>
<d>0.009785</d>
<d>0.009785</d>
<d>0.003682</d>
<d>0.003682</d>
<d>-0.00242</d>
<d>0.003682</d>
<d>-0.00242</d>
<d>-0.00242</d>
<d>-0.00852</d>
<d>-0.00852</d>
<d>-0.01463</d>
<d>-0.02684</d>
<d>-0.02684</d>
<d>-0.02073</d>
<d>-0.01463</d>
<d>-0.00852</d>
<d>-0.00852</d>
<d>-0.00242</d>
<d>-0.00242</d>
<d>0.003682</d>
<d>0.003682</d>
<d>-0.00242</d>
<d>-0.00242</d>
<d>-0.00242</d>
<d>-0.00852</d>
<d>-0.01463</d>
<d>-0.00852</d>
<d>-0.00242</d>
<d>0.003682</d>
<d>0.009785</d>
<d>0.009785</d>
<d>0.003682</d>
<d>-0.00242</d>
<d>-0.00242</d>
<d>-0.00852</d>
<d>-0.00242</d>
<d>0.003682</d>
<d>-0.00242</d>
<d>0.003682</d>
<d>0.003682</d>
<d>0.003682</d>
<d>0.009785</d>
<d>0.009785</d>
<d>0.009785</d>
<d>0.003682</d>
<d>-0.00852</d>
<d>-0.00242</d>
<d>-0.01463</d>
<d>-0.00242</d>
<d>0.003682</d>
<d>-0.00242</d>
<d>0.003682</d>
<d>-0.00242</d>
<d>0.003682</d>
<d>0.003682</d>
<d>-0.00242</d>
<d>-0.00242</d>
<d>-0.00852</d>
<d>-0.00852</d>
<d>0.003682</d>
<d>-0.00242</d>
<d>-0.00852</d>
<d>-0.02073</d>
<d>-0.00852</d>
<d>-0.00242</d>
<d>-0.00852</d>
<d>-0.01463</d>
<d>-0.02073</d>
<d>-0.00852</d>
<d>0.003682</d>
<d>0.003682</d>
<d>-0.00242</d>
<d>-0.00852</d>
<d>-0.01463</d>
<d>0.003682</d>
<d>-0.00242</d>
<d>0.003682</d>
<d>-0.00852</d>
<d>-0.01463</d>
<d>-0.01463</d>
<d>-0.02073</d>
<d>-0.01463</d>
<d>-0.00242</d>
<d>-0.00852</d>
<d>-0.00852</d>
<d>-0.01463</d>
<d>-0.01463</d>
<d>-0.00852</d>
<d>-0.00852</d>
<d>0.009785</d>
<d>0.009785</d>
<d>0.009785</d>
<d>0.003682</d>
<d>-0.00242</d>
<d>-0.00852</d>
<d>-0.00852</d>
<d>-0.01463</d>
</Subcolumn>
</YColumn>
<YColumn Width="103" Decimals="6" Subcolumns="1">
<Title>6</Title>
<Subcolumn>
<d>0.00803</d>
<d>0.014133</d>
<d>0.014133</d>
<d>0.014133</d>
<d>0.014133</d>
<d>0.00803</d>
<d>-0.004177</d>
<d>-0.004177</d>
<d>0.00803</d>
<d>0.001926</d>
<d>0.001926</d>
<d>0.001926</d>
<d>0.001926</d>
<d>-0.004177</d>
<d>0.001926</d>
<d>0.020237</d>
<d>0.020237</d>
<d>0.02634</d>
<d>0.00803</d>
<d>0.001926</d>
<d>-0.004177</d>
<d>-0.010281</d>
<d>-0.016384</d>
<d>-0.016384</d>
<d>-0.004177</d>
<d>-0.010281</d>
<d>0.001926</d>
<d>0.001926</d>
<d>-0.004177</d>
<d>0.00803</d>
<d>0.00803</d>
<d>0.014133</d>
<d>0.020237</d>
<d>0.00803</d>
<d>0.001926</d>
<d>0.001926</d>
<d>0.001926</d>
<d>0.00803</d>
<d>0.014133</d>
<d>0.00803</d>
<d>0.00803</d>
<d>0.001926</d>
<d>-0.010281</d>
<d>-0.016384</d>
<d>-0.016384</d>
<d>-0.010281</d>
<d>0.001926</d>
<d>-0.010281</d>
<d>0.00803</d>
<d>0.020237</d>
<d>0.02634</d>
<d>0.02634</d>
<d>0.020237</d>
<d>0.001926</d>
<d>0.001926</d>
<d>0.001926</d>
<d>0.014133</d>
<d>0.014133</d>
<d>0.00803</d>
<d>-0.004177</d>
<d>-0.016384</d>
<d>-0.004177</d>
<d>0.00803</d>
<d>0.014133</d>
<d>0.014133</d>
<d>0.001926</d>
<d>0.001926</d>
<d>0.001926</d>
<d>-0.004177</d>
<d>-0.028591</d>
<d>-0.016384</d>
<d>-0.022488</d>
<d>-0.022488</d>
<d>-0.010281</d>
<d>-0.010281</d>
<d>0.001926</d>
<d>-0.004177</d>
<d>0.001926</d>
<d>0.001926</d>
<d>0.001926</d>
<d>0.00803</d>
<d>0.00803</d>
<d>0.00803</d>
<d>0.00803</d>
<d>0.00803</d>
<d>-0.010281</d>
<d>-0.016384</d>
<d>-0.022488</d>
<d>-0.010281</d>
<d>-0.004177</d>
<d>0.001926</d>
<d>0.00803</d>
<d>0.001926</d>
<d>0.014133</d>
<d>0.020237</d>
<d>0.014133</d>
<d>0.014133</d>
<d>0.020237</d>
<d>0.001926</d>
<d>0.001926</d>
<d>0.001926</d>
<d>-0.004177</d>
<d>-0.010281</d>
<d>-0.016384</d>
<d>0.001926</d>
<d>-0.004177</d>
<d>-0.004177</d>
<d>0.014133</d>
<d>0.014133</d>
<d>0.020237</d>
<d>0.020237</d>
<d>0.020237</d>
<d>0.020237</d>
<d>0.02634</d>
<d>0.014133</d>
<d>0.00803</d>
<d>-0.016384</d>
<d>-0.004177</d>
<d>0.001926</d>
<d>-0.004177</d>
<d>-0.022488</d>
<d>-0.016384</d>
<d>-0.010281</d>
<d>0.00803</d>
<d>0.001926</d>
<d>0.00803</d>
<d>0.001926</d>
<d>0.001926</d>
<d>0.014133</d>
<d>0.00803</d>
<d>-0.004177</d>
<d>0.00803</d>
<d>0.001926</d>
<d>-0.004177</d>
<d>0.001926</d>
<d>-0.010281</d>
<d>-0.010281</d>
<d>-0.022488</d>
<d>0.00803</d>
<d>0.001926</d>
<d>0.001926</d>
<d>0.00803</d>
<d>0.001926</d>
<d>-0.004177</d>
<d>-0.016384</d>
<d>-0.004177</d>
<d>0.014133</d>
<d>-0.010281</d>
<d>-0.004177</d>
<d>-0.004177</d>
<d>-0.010281</d>
<d>-0.004177</d>
<d>0.001926</d>
<d>-0.010281</d>
<d>-0.004177</d>
<d>-0.004177</d>
<d>-0.010281</d>
<d>-0.010281</d>
<d>-0.022488</d>
<d>-0.016384</d>
<d>-0.004177</d>
<d>-0.016384</d>
<d>-0.022488</d>
<d>-0.022488</d>
<d>-0.022488</d>
<d>-0.022488</d>
<d>-0.022488</d>
<d>-0.022488</d>
<d>-0.016384</d>
<d>-0.010281</d>
<d>-0.010281</d>
<d>-0.016384</d>
<d>-0.028591</d>
<d>-0.004177</d>
<d>-0.004177</d>
<d>-0.010281</d>
<d>-0.004177</d>
<d>-0.004177</d>
<d>0.001926</d>
<d>0.001926</d>
<d>0.00803</d>
<d>-0.010281</d>
<d>-0.016384</d>
<d>-0.022488</d>
<d>-0.004177</d>
<d>-0.010281</d>
<d>-0.010281</d>
<d>-0.004177</d>
<d>-0.004177</d>
<d>0.001926</d>
<d>0.001926</d>
<d>-0.004177</d>
<d>-0.004177</d>
<d>-0.010281</d>
<d>-0.010281</d>
<d>-0.004177</d>
<d>0.00803</d>
<d>0.001926</d>
<d>0.001926</d>
<d>0.00803</d>
<d>0.001926</d>
<d>0.001926</d>
<d>-0.016384</d>
<d>-0.010281</d>
<d>-0.004177</d>
<d>-0.016384</d>
<d>-0.010281</d>
<d>-0.016384</d>
<d>-0.016384</d>
<d>-0.004177</d>
<d>0.014133</d>
<d>0.014133</d>
<d>0.00803</d>
<d>0.001926</d>
<d>-0.010281</d>
<d>0.00803</d>
<d>0.02634</d>
<d>0.020237</d>
<d>0.020237</d>
<d>-0.004177</d>
<d>0.001926</d>
<d>0.00803</d>
<d>-0.016384</d>
<d>-0.010281</d>
<d>0.001926</d>
<d>-0.010281</d>
<d>0.001926</d>
<d>-0.004177</d>
<d>-0.010281</d>
<d>-0.004177</d>
<d>-0.010281</d>
<d>0.001926</d>
<d>0.00803</d>
<d>0.001926</d>
<d>0.001926</d>
<d>-0.010281</d>
<d>-0.004177</d>
<d>-0.016384</d>
<d>0.001926</d>
<d>-0.004177</d>
<d>0.001926</d>
<d>0.001926</d>
<d>-0.010281</d>
<d>-0.004177</d>
<d>0.001926</d>
<d>-0.010281</d>
<d>-0.010281</d>
<d>-0.010281</d>
<d>0.001926</d>
<d>0.001926</d>
<d>-0.004177</d>
<d>-0.004177</d>
<d>-0.004177</d>
<d>-0.004177</d>
<d>-0.004177</d>
<d>0.001926</d>
<d>-0.010281</d>
<d>-0.016384</d>
<d>-0.034695</d>
<d>-0.034695</d>
<d>-0.016384</d>
<d>0.001926</d>
<d>0.00803</d>
<d>0.00803</d>
<d>-0.004177</d>
<d>-0.004177</d>
<d>-0.004177</d>
<d>0.00803</d>
<d>0.00803</d>
<d>0.00803</d>
<d>0.001926</d>
<d>0.001926</d>
<d>-0.004177</d>
<d>0.001926</d>
<d>0.001926</d>
<d>0.001926</d>
<d>0.02634</d>
<d>0.014133</d>
<d>0.00803</d>
<d>0.02634</d>
<d>0.020237</d>
<d>0.00803</d>
<d>0.00803</d>
<d>0.001926</d>
<d>0.014133</d>
<d>0.014133</d>
<d>0.001926</d>
<d>0.020237</d>
<d>0.014133</d>
<d>0.014133</d>
<d>0.00803</d>
<d>-0.004177</d>
<d>0.00803</d>
<d>0.00803</d>
<d>0.001926</d>
<d>0.020237</d>
<d>0.014133</d>
<d>-0.004177</d>
<d>0.001926</d>
<d>0.00803</d>
<d>0.014133</d>
<d>0.00803</d>
<d>-0.016384</d>
<d>-0.004177</d>
<d>-0.004177</d>
<d>-0.010281</d>
<d>-0.016384</d>
<d>-0.010281</d>
<d>-0.010281</d>
<d>0.014133</d>
<d>0.001926</d>
<d>-0.010281</d>
<d>-0.004177</d>
<d>-0.010281</d>
<d>-0.010281</d>
<d>0.00803</d>
<d>0.001926</d>
<d>-0.004177</d>
<d>0.001926</d>
<d>0.00803</d>
<d>0.014133</d>
<d>0.00803</d>
<d>-0.004177</d>
<d>-0.004177</d>
<d>-0.010281</d>
<d>-0.004177</d>
<d>0.00803</d>
<d>0.001926</d>
<d>0.00803</d>
<d>0.001926</d>
<d>0.001926</d>
<d>0.001926</d>
<d>-0.010281</d>
<d>0.001926</d>
<d>-0.004177</d>
<d>-0.004177</d>
<d>-0.010281</d>
<d>-0.004177</d>
<d>0.001926</d>
<d>-0.010281</d>
<d>0.001926</d>
<d>0.00803</d>
<d>-0.010281</d>
<d>-0.004177</d>
<d>0.001926</d>
<d>0.00803</d>
<d>0.014133</d>
<d>0.014133</d>
<d>0.02634</d>
<d>0.020237</d>
<d>0.00803</d>
<d>-0.010281</d>
<d>-0.016384</d>
<d>-0.016384</d>
<d>-0.004177</d>
<d>0.001926</d>
<d>0.001926</d>
<d>0.014133</d>
<d>0.00803</d>
<d>-0.004177</d>
<d>-0.010281</d>
<d>-0.004177</d>
<d>-0.010281</d>
<d>-0.010281</d>
<d>-0.004177</d>
<d>-0.004177</d>
<d>0.001926</d>
<d>0.00803</d>
<d>0.00803</d>
<d>0.00803</d>
<d>-0.004177</d>
<d>0.001926</d>
<d>0.00803</d>
<d>0.00803</d>
<d>0.00803</d>
<d>-0.010281</d>
<d>-0.016384</d>
<d>-0.004177</d>
<d>0.00803</d>
<d>0.00803</d>
<d>0.001926</d>
<d>0.00803</d>
<d>0.014133</d>
<d>0.00803</d>
<d>0.014133</d>
<d>0.00803</d>
<d>-0.004177</d>
<d>0.001926</d>
<d>-0.004177</d>
<d>0.001926</d>
<d>0.00803</d>
<d>0.001926</d>
<d>0.02634</d>
<d>0.02634</d>
<d>0.014133</d>
<d>0.00803</d>
<d>0.00803</d>
<d>-0.010281</d>
<d>0.001926</d>
<d>-0.004177</d>
<d>-0.004177</d>
<d>-0.498562</d>
<d>-1.139431</d>
<d>-0.413113</d>
<d>0.496311</d>
<d>0.307102</d>
<d>0.105686</d>
<d>0.093479</d>
<d>0.075169</d>
<d>0.075169</d>
<d>0.069065</d>
<d>0.056858</d>
<d>0.056858</d>
<d>0.050755</d>
<d>0.038548</d>
<d>0.02634</d>
<d>0.014133</d>
<d>0.020237</d>
<d>0.020237</d>
<d>0.014133</d>
<d>0.014133</d>
<d>0.014133</d>
<d>0.001926</d>
<d>0.001926</d>
<d>-0.004177</d>
<d>0.014133</d>
<d>0.014133</d>
<d>0.001926</d>
<d>0.020237</d>
<d>0.00803</d>
<d>0.00803</d>
<d>0.00803</d>
<d>0.001926</d>
<d>0.014133</d>
<d>0.032444</d>
<d>0.038548</d>
<d>0.032444</d>
<d>0.032444</d>
<d>0.02634</d>
<d>0.014133</d>
<d>0.00803</d>
<d>0.001926</d>
<d>-0.010281</d>
<d>-0.010281</d>
<d>0.001926</d>
<d>-0.004177</d>
<d>0.001926</d>
<d>0.001926</d>
<d>-0.004177</d>
<d>-0.004177</d>
<d>-0.016384</d>
<d>-0.010281</d>
<d>-0.004177</d>
<d>-0.022488</d>
<d>-0.028591</d>
<d>-0.028591</d>
<d>-0.022488</d>
<d>-0.004177</d>
<d>0.00803</d>
<d>-0.004177</d>
<d>-0.004177</d>
<d>0.001926</d>
<d>0.001926</d>
<d>0.00803</d>
<d>0.020237</d>
<d>0.00803</d>
<d>-0.004177</d>
<d>-0.010281</d>
<d>-0.016384</d>
<d>-0.010281</d>
<d>-0.010281</d>
<d>-0.010281</d>
<d>-0.010281</d>
<d>-0.016384</d>
<d>-0.034695</d>
<d>-0.034695</d>
<d>-0.028591</d>
<d>-0.028591</d>
<d>-0.028591</d>
<d>-0.016384</d>
<d>-0.010281</d>
<d>-0.016384</d>
<d>-0.016384</d>
<d>-0.022488</d>
<d>-0.010281</d>
<d>-0.004177</d>
<d>-0.010281</d>
<d>-0.010281</d>
<d>-0.004177</d>
<d>-0.016384</d>
<d>-0.028591</d>
<d>-0.034695</d>
<d>-0.022488</d>
<d>-0.022488</d>
<d>-0.028591</d>
<d>-0.022488</d>
<d>-0.028591</d>
<d>-0.010281</d>
<d>-0.010281</d>
<d>-0.022488</d>
<d>-0.016384</d>
<d>-0.016384</d>
<d>-0.022488</d>
<d>-0.028591</d>
<d>-0.034695</d>
<d>-0.040798</d>
<d>-0.046902</d>
<d>-0.046902</d>
<d>-0.046902</d>
<d>-0.028591</d>
<d>-0.016384</d>
<d>-0.028591</d>
<d>-0.028591</d>
<d>-0.016384</d>
<d>-0.022488</d>
<d>-0.022488</d>
<d>-0.040798</d>
<d>-0.059109</d>
<d>-0.059109</d>
<d>-0.059109</d>
<d>-0.053005</d>
<d>-0.040798</d>
<d>-0.034695</d>
<d>-0.040798</d>
<d>-0.040798</d>
<d>-0.028591</d>
<d>-0.034695</d>
<d>-0.028591</d>
<d>-0.034695</d>
<d>-0.028591</d>
<d>-0.028591</d>
<d>-0.028591</d>
<d>-0.016384</d>
<d>-0.040798</d>
<d>-0.040798</d>
<d>-0.028591</d>
<d>-0.040798</d>
<d>-0.028591</d>
<d>-0.028591</d>
<d>-0.028591</d>
<d>-0.028591</d>
<d>-0.034695</d>
<d>-0.034695</d>
<d>-0.034695</d>
<d>-0.040798</d>
<d>-0.022488</d>
<d>-0.016384</d>
<d>-0.016384</d>
<d>-0.022488</d>
<d>-0.016384</d>
<d>-0.022488</d>
<d>-0.028591</d>
<d>-0.028591</d>
<d>-0.022488</d>
<d>-0.016384</d>
<d>-0.010281</d>
<d>-0.016384</d>
<d>-0.010281</d>
<d>-0.004177</d>
<d>-0.004177</d>
<d>-0.010281</d>
<d>-0.028591</d>
<d>-0.028591</d>
<d>-0.028591</d>
<d>-0.022488</d>
<d>-0.028591</d>
<d>-0.034695</d>
<d>-0.028591</d>
<d>-0.028591</d>
<d>-0.028591</d>
<d>-0.022488</d>
<d>-0.022488</d>
<d>-0.010281</d>
<d>-0.016384</d>
<d>-0.028591</d>
<d>-0.022488</d>
<d>-0.016384</d>
<d>-0.016384</d>
<d>-0.028591</d>
<d>-0.040798</d>
<d>-0.046902</d>
<d>-0.022488</d>
<d>-0.010281</d>
<d>-0.016384</d>
<d>-0.004177</d>
<d>-0.010281</d>
<d>-0.010281</d>
<d>-0.004177</d>
<d>-0.004177</d>
<d>-0.016384</d>
<d>-0.016384</d>
<d>-0.028591</d>
<d>-0.028591</d>
<d>-0.022488</d>
<d>-0.028591</d>
<d>-0.016384</d>
<d>-0.004177</d>
<d>-0.004177</d>
<d>-0.010281</d>
<d>-0.010281</d>
<d>-0.010281</d>
<d>-0.016384</d>
<d>-0.004177</d>
<d>-0.022488</d>
<d>-0.022488</d>
<d>-0.022488</d>
<d>-0.028591</d>
<d>-0.004177</d>
<d>-0.010281</d>
<d>-0.016384</d>
<d>-0.028591</d>
<d>-0.016384</d>
<d>-0.028591</d>
<d>-0.022488</d>
<d>-0.016384</d>
<d>-0.004177</d>
<d>-0.028591</d>
<d>-0.022488</d>
<d>-0.016384</d>
<d>-0.022488</d>
<d>-0.028591</d>
<d>-0.010281</d>
<d>-0.010281</d>
<d>-0.010281</d>
<d>-0.010281</d>
<d>-0.016384</d>
<d>0.001926</d>
<d>0.00803</d>
<d>-0.022488</d>
<d>-0.022488</d>
<d>-0.016384</d>
<d>-0.028591</d>
<d>-0.034695</d>
<d>-0.004177</d>
<d>0.001926</d>
<d>-0.016384</d>
<d>-0.028591</d>
<d>-0.040798</d>
<d>-0.028591</d>
<d>-0.028591</d>
<d>-0.028591</d>
<d>-0.016384</d>
<d>-0.022488</d>
<d>-0.016384</d>
<d>-0.010281</d>
<d>-0.010281</d>
<d>-0.010281</d>
<d>-0.016384</d>
<d>-0.016384</d>
<d>-0.022488</d>
<d>-0.040798</d>
<d>-0.034695</d>
<d>-0.016384</d>
<d>0.001926</d>
<d>0.001926</d>
<d>-0.004177</d>
<d>-0.016384</d>
<d>-0.010281</d>
<d>-0.016384</d>
<d>-0.022488</d>
<d>-0.034695</d>
<d>-0.034695</d>
<d>-0.022488</d>
<d>-0.022488</d>
<d>-0.010281</d>
<d>-0.010281</d>
<d>-0.016384</d>
<d>0.001926</d>
<d>0.00803</d>
<d>0.001926</d>
<d>0.014133</d>
<d>0.00803</d>
<d>-0.010281</d>
<d>-0.010281</d>
<d>-0.010281</d>
<d>-0.022488</d>
<d>-0.022488</d>
<d>-0.022488</d>
<d>-0.028591</d>
<d>-0.034695</d>
<d>-0.040798</d>
<d>-0.034695</d>
<d>-0.016384</d>
<d>-0.010281</d>
<d>-0.010281</d>
<d>-0.004177</d>
<d>-0.016384</d>
<d>-0.010281</d>
<d>-0.010281</d>
<d>-0.010281</d>
<d>-0.010281</d>
<d>-0.004177</d>
<d>-0.004177</d>
<d>-0.010281</d>
<d>-0.016384</d>
<d>-0.022488</d>
<d>-0.028591</d>
<d>-0.022488</d>
<d>-0.028591</d>
<d>-0.022488</d>
<d>-0.016384</d>
<d>-0.016384</d>
<d>-0.016384</d>
<d>-0.034695</d>
<d>-0.034695</d>
<d>-0.022488</d>
<d>-0.028591</d>
<d>-0.016384</d>
<d>-0.022488</d>
<d>-0.016384</d>
<d>-0.022488</d>
<d>-0.016384</d>
<d>-0.016384</d>
<d>-0.016384</d>
<d>-0.022488</d>
<d>-0.016384</d>
<d>-0.022488</d>
<d>-0.010281</d>
<d>0.001926</d>
<d>0.001926</d>
<d>-0.010281</d>
<d>-0.022488</d>
<d>-0.016384</d>
<d>-0.004177</d>
<d>-0.004177</d>
<d>-0.022488</d>
<d>-0.016384</d>
<d>-0.016384</d>
<d>-0.016384</d>
<d>-0.028591</d>
<d>-0.016384</d>
<d>-0.016384</d>
<d>-0.022488</d>
<d>-0.016384</d>
<d>-0.010281</d>
<d>0.001926</d>
<d>0.014133</d>
<d>0.02634</d>
<d>0.020237</d>
<d>0.014133</d>
<d>0.001926</d>
<d>-0.004177</d>
<d>-0.004177</d>
<d>-0.010281</d>
<d>-0.010281</d>
<d>0.001926</d>
<d>0.001926</d>
<d>0.001926</d>
<d>-0.004177</d>
<d>0.001926</d>
<d>0.001926</d>
<d>0.001926</d>
<d>-0.004177</d>
<d>0.001926</d>
<d>-0.004177</d>
<d>-0.004177</d>
<d>-0.010281</d>
<d>-0.010281</d>
<d>-0.016384</d>
<d>-0.016384</d>
<d>-0.016384</d>
<d>0.001926</d>
<d>-0.004177</d>
<d>-0.016384</d>
<d>-0.004177</d>
<d>0.001926</d>
<d>0.00803</d>
<d>-0.004177</d>
<d>0.001926</d>
<d>0.020237</d>
<d>0.00803</d>
<d>0.014133</d>
<d>0.014133</d>
<d>0.00803</d>
<d>0.00803</d>
<d>0.00803</d>
<d>0.001926</d>
<d>-0.004177</d>
<d>-0.004177</d>
<d>0.014133</d>
<d>0.001926</d>
<d>0.001926</d>
<d>0.001926</d>
<d>-0.016384</d>
<d>-0.016384</d>
<d>-0.010281</d>
<d>0.001926</d>
<d>0.00803</d>
<d>0.014133</d>
<d>0.00803</d>
<d>0.00803</d>
<d>0.00803</d>
<d>0.001926</d>
<d>0.001926</d>
<d>0.001926</d>
<d>0.00803</d>
<d>0.014133</d>
<d>0.001926</d>
<d>0.00803</d>
<d>0.001926</d>
<d>-0.010281</d>
<d>-0.010281</d>
<d>-0.022488</d>
<d>-0.022488</d>
<d>-0.010281</d>
<d>0.001926</d>
<d>0.014133</d>
<d>0.020237</d>
<d>-0.004177</d>
<d>0.001926</d>
<d>0.001926</d>
<d>0.00803</d>
<d>0.02634</d>
<d>0.001926</d>
<d>0.001926</d>
<d>0.001926</d>
<d>-0.010281</d>
<d>0.001926</d>
<d>0.001926</d>
<d>0.014133</d>
<d>0.02634</d>
<d>0.02634</d>
<d>0.032444</d>
<d>0.014133</d>
<d>0.020237</d>
<d>0.00803</d>
<d>0.00803</d>
<d>0.001926</d>
<d>-0.010281</d>
<d>-0.022488</d>
<d>-0.016384</d>
<d>-0.016384</d>
<d>-0.010281</d>
<d>-0.010281</d>
<d>-0.022488</d>
<d>-0.010281</d>
<d>-0.010281</d>
<d>-0.010281</d>
<d>0.001926</d>
<d>0.00803</d>
<d>0.001926</d>
<d>0.001926</d>
<d>-0.004177</d>
<d>0.001926</d>
<d>0.020237</d>
<d>0.001926</d>
<d>-0.004177</d>
<d>-0.004177</d>
<d>-0.016384</d>
<d>-0.010281</d>
<d>-0.022488</d>
<d>-0.016384</d>
<d>-0.016384</d>
<d>0.001926</d>
<d>0.00803</d>
<d>-0.004177</d>
<d>-0.016384</d>
<d>0.00803</d>
<d>0.00803</d>
<d>-0.010281</d>
<d>-0.004177</d>
<d>-0.004177</d>
<d>-0.016384</d>
<d>-0.010281</d>
<d>-0.010281</d>
<d>-0.016384</d>
<d>-0.010281</d>
<d>-0.010281</d>
<d>0.001926</d>
<d>-0.004177</d>
<d>-0.016384</d>
<d>-0.010281</d>
<d>0.00803</d>
<d>0.001926</d>
<d>0.020237</d>
<d>0.020237</d>
<d>0.00803</d>
<d>0.00803</d>
<d>0.001926</d>
<d>0.001926</d>
<d>-0.004177</d>
<d>0.001926</d>
<d>0.001926</d>
<d>0.001926</d>
<d>-0.004177</d>
<d>0.001926</d>
<d>0.00803</d>
<d>0.001926</d>
<d>-0.004177</d>
<d>0.00803</d>
<d>0.001926</d>
<d>0.001926</d>
<d>0.014133</d>
<d>0.00803</d>
<d>0.00803</d>
<d>0.001926</d>
<d>0.001926</d>
<d>-0.004177</d>
<d>0.001926</d>
<d>-0.004177</d>
<d>0.001926</d>
<d>0.00803</d>
<d>0.001926</d>
<d>-0.010281</d>
<d>-0.010281</d>
<d>-0.010281</d>
<d>-0.004177</d>
<d>0.00803</d>
<d>0.001926</d>
<d>0.001926</d>
<d>-0.010281</d>
<d>-0.004177</d>
<d>-0.004177</d>
<d>0.001926</d>
<d>-0.004177</d>
<d>0.001926</d>
<d>-0.004177</d>
<d>0.001926</d>
<d>0.00803</d>
<d>-0.004177</d>
<d>-0.004177</d>
<d>-0.004177</d>
<d>-0.016384</d>
<d>-0.016384</d>
<d>-0.016384</d>
<d>-0.022488</d>
<d>-0.016384</d>
<d>-0.034695</d>
<d>-0.022488</d>
<d>-0.016384</d>
<d>-0.016384</d>
<d>-0.004177</d>
<d>-0.010281</d>
<d>-0.004177</d>
<d>-0.016384</d>
<d>-0.022488</d>
<d>-0.016384</d>
<d>-0.022488</d>
<d>-0.022488</d>
<d>-0.010281</d>
<d>-0.010281</d>
<d>-0.004177</d>
<d>0.00803</d>
<d>-0.004177</d>
<d>0.014133</d>
<d>0.014133</d>
<d>0.001926</d>
<d>-0.010281</d>
<d>-0.004177</d>
<d>0.001926</d>
<d>0.001926</d>
<d>0.00803</d>
<d>-0.004177</d>
<d>-0.028591</d>
<d>-0.022488</d>
<d>-0.004177</d>
<d>-0.004177</d>
<d>-0.010281</d>
<d>-0.004177</d>
<d>-0.022488</d>
<d>-0.010281</d>
<d>0.001926</d>
<d>-0.016384</d>
<d>0.001926</d>
<d>-0.004177</d>
<d>-0.010281</d>
<d>-0.004177</d>
<d>-0.004177</d>
<d>0.014133</d>
<d>-0.010281</d>
<d>-0.016384</d>
<d>-0.022488</d>
<d>-0.034695</d>
<d>-0.028591</d>
<d>-0.034695</d>
<d>-0.016384</d>
<d>-0.004177</d>
<d>-0.004177</d>
<d>-0.022488</d>
<d>-0.022488</d>
<d>-0.004177</d>
<d>0.00803</d>
<d>0.00803</d>
<d>0.014133</d>
<d>0.020237</d>
<d>0.020237</d>
<d>0.020237</d>
<d>0.00803</d>
<d>0.00803</d>
<d>0.001926</d>
<d>0.014133</d>
<d>0.001926</d>
<d>-0.004177</d>
<d>-0.004177</d>
<d>-0.016384</d>
<d>-0.010281</d>
<d>0.001926</d>
<d>-0.004177</d>
<d>0.00803</d>
<d>-0.004177</d>
<d>0.00803</d>
<d>0.02634</d>
<d>0.014133</d>
<d>0.00803</d>
<d>0.00803</d>
<d>0.00803</d>
<d>0.001926</d>
<d>-0.004177</d>
<d>-0.010281</d>
<d>-0.004177</d>
<d>0.00803</d>
<d>-0.010281</d>
<d>-0.010281</d>
<d>0.001926</d>
<d>-0.004177</d>
<d>-0.004177</d>
<d>0.001926</d>
<d>-0.004177</d>
<d>0.001926</d>
<d>-0.010281</d>
<d>0.001926</d>
<d>0.001926</d>
<d>0.001926</d>
<d>-0.004177</d>
<d>-0.010281</d>
<d>-0.016384</d>
<d>-0.004177</d>
<d>-0.010281</d>
<d>0.001926</d>
<d>0.00803</d>
<d>0.00803</d>
<d>-0.004177</d>
<d>-0.004177</d>
<d>-0.004177</d>
<d>0.00803</d>
<d>0.00803</d>
<d>0.001926</d>
<d>-0.010281</d>
<d>-0.004177</d>
<d>-0.004177</d>
<d>-0.004177</d>
<d>-0.010281</d>
<d>-0.010281</d>
<d>-0.010281</d>
<d>-0.004177</d>
<d>0.00803</d>
<d>0.001926</d>
<d>0.001926</d>
<d>-0.010281</d>
<d>0.001926</d>
<d>0.00803</d>
<d>0.00803</d>
<d>0.001926</d>
<d>-0.016384</d>
<d>0.001926</d>
<d>-0.004177</d>
<d>-0.010281</d>
<d>-0.034695</d>
<d>-0.028591</d>
<d>-0.010281</d>
<d>-0.010281</d>
<d>-0.016384</d>
<d>-0.010281</d>
<d>0.001926</d>
<d>0.00803</d>
<d>0.014133</d>
<d>0.00803</d>
<d>0.00803</d>
<d>0.001926</d>
<d>0.00803</d>
<d>-0.010281</d>
<d>0.001926</d>
<d>0.001926</d>
<d>0.001926</d>
<d>0.014133</d>
<d>0.020237</d>
<d>0.001926</d>
<d>0.001926</d>
<d>-0.010281</d>
<d>0.001926</d>
<d>0.001926</d>
<d>-0.016384</d>
<d>-0.016384</d>
<d>0.00803</d>
<d>0.00803</d>
<d>0.00803</d>
<d>0.00803</d>
<d>0.001926</d>
<d>0.001926</d>
<d>0.001926</d>
<d>-0.010281</d>
<d>-0.022488</d>
<d>-0.010281</d>
<d>-0.004177</d>
<d>-0.010281</d>
<d>-0.004177</d>
<d>0.001926</d>
<d>0.00803</d>
<d>0.014133</d>
<d>0.014133</d>
<d>0.001926</d>
<d>-0.004177</d>
<d>0.014133</d>
<d>0.001926</d>
<d>0.001926</d>
<d>0.00803</d>
<d>0.00803</d>
<d>0.020237</d>
<d>0.014133</d>
<d>0.001926</d>
<d>0.001926</d>
<d>0.00803</d>
<d>0.001926</d>
<d>0.001926</d>
<d>0.001926</d>
<d>0.001926</d>
<d>0.00803</d>
<d>0.001926</d>
<d>-0.004177</d>
<d>-0.010281</d>
<d>-0.016384</d>
<d>-0.004177</d>
<d>-0.010281</d>
<d>-0.004177</d>
<d>-0.010281</d>
<d>-0.016384</d>
<d>-0.010281</d>
<d>0.014133</d>
<d>0.032444</d>
<d>0.032444</d>
<d>0.00803</d>
<d>0.001926</d>
<d>-0.022488</d>
<d>-0.004177</d>
<d>-0.004177</d>
<d>-0.004177</d>
<d>0.001926</d>
<d>-0.016384</d>
<d>-0.016384</d>
<d>-0.016384</d>
<d>-0.016384</d>
<d>-0.010281</d>
<d>-0.004177</d>
<d>0.00803</d>
<d>0.00803</d>
<d>0.001926</d>
<d>-0.004177</d>
<d>0.001926</d>
<d>0.00803</d>
<d>0.00803</d>
<d>0.00803</d>
<d>0.001926</d>
<d>0.00803</d>
<d>0.00803</d>
<d>-0.010281</d>
<d>0.001926</d>
<d>0.014133</d>
<d>0.00803</d>
<d>0.001926</d>
<d>0.001926</d>
<d>0.001926</d>
<d>0.001926</d>
<d>0.014133</d>
<d>0.020237</d>
<d>0.014133</d>
<d>0.00803</d>
<d>0.001926</d>
<d>0.001926</d>
<d>0.00803</d>
<d>0.00803</d>
<d>0.014133</d>
<d>0.00803</d>
<d>0.00803</d>
<d>0.00803</d>
<d>0.00803</d>
<d>0.00803</d>
<d>0.00803</d>
<d>0.001926</d>
<d>0.00803</d>
<d>0.00803</d>
<d>0.00803</d>
<d>-0.010281</d>
<d>-0.010281</d>
<d>-0.004177</d>
<d>-0.010281</d>
<d>0.001926</d>
<d>0.001926</d>
<d>-0.004177</d>
<d>0.001926</d>
<d>0.001926</d>
<d>0.00803</d>
<d>-0.004177</d>
<d>-0.010281</d>
<d>0.001926</d>
<d>-0.004177</d>
<d>-0.010281</d>
<d>-0.010281</d>
<d>-0.010281</d>
<d>-0.004177</d>
<d>0.014133</d>
<d>0.00803</d>
<d>-0.010281</d>
<d>0.001926</d>
<d>0.001926</d>
<d>0.00803</d>
<d>0.014133</d>
<d>0.001926</d>
<d>-0.010281</d>
<d>-0.010281</d>
<d>-0.010281</d>
<d>-0.004177</d>
<d>0.014133</d>
<d>0.00803</d>
<d>0.00803</d>
<d>0.001926</d>
<d>0.014133</d>
<d>-0.010281</d>
<d>-0.028591</d>
<d>-0.028591</d>
<d>-0.010281</d>
<d>-0.010281</d>
<d>-0.010281</d>
<d>-0.010281</d>
<d>-0.010281</d>
<d>-0.004177</d>
<d>-0.016384</d>
<d>0.001926</d>
<d>0.014133</d>
<d>-0.004177</d>
<d>0.001926</d>
<d>0.001926</d>
<d>-0.004177</d>
<d>-0.010281</d>
<d>-0.010281</d>
<d>0.001926</d>
<d>-0.010281</d>
<d>-0.016384</d>
<d>-0.016384</d>
<d>-0.016384</d>
<d>-0.010281</d>
<d>-0.016384</d>
<d>-0.010281</d>
<d>-0.004177</d>
<d>0.001926</d>
<d>0.014133</d>
<d>0.00803</d>
<d>0.00803</d>
<d>-0.004177</d>
<d>-0.022488</d>
<d>-0.022488</d>
<d>-0.016384</d>
<d>-0.016384</d>
<d>-0.010281</d>
<d>-0.004177</d>
<d>0.014133</d>
<d>0.001926</d>
<d>0.001926</d>
<d>-0.004177</d>
<d>-0.016384</d>
<d>0.001926</d>
<d>-0.004177</d>
<d>-0.010281</d>
<d>-0.016384</d>
<d>-0.004177</d>
<d>0.001926</d>
<d>-0.004177</d>
<d>0.001926</d>
<d>0.00803</d>
<d>0.00803</d>
<d>0.001926</d>
<d>-0.010281</d>
<d>-0.010281</d>
<d>0.001926</d>
<d>-0.004177</d>
<d>-0.004177</d>
<d>0.001926</d>
<d>0.001926</d>
<d>0.00803</d>
<d>0.014133</d>
<d>0.001926</d>
<d>-0.004177</d>
<d>0.001926</d>
<d>0.001926</d>
<d>0.014133</d>
<d>0.00803</d>
<d>0.00803</d>
<d>0.014133</d>
<d>0.00803</d>
<d>0.001926</d>
<d>-0.004177</d>
<d>-0.010281</d>
<d>-0.004177</d>
<d>-0.010281</d>
<d>-0.016384</d>
<d>-0.016384</d>
<d>-0.016384</d>
<d>-0.010281</d>
<d>-0.004177</d>
<d>0.001926</d>
<d>-0.004177</d>
<d>-0.016384</d>
<d>-0.016384</d>
<d>-0.022488</d>
<d>-0.028591</d>
<d>-0.028591</d>
<d>-0.022488</d>
<d>-0.016384</d>
<d>-0.010281</d>
<d>-0.010281</d>
<d>-0.016384</d>
<d>-0.004177</d>
<d>-0.004177</d>
<d>-0.004177</d>
<d>0.014133</d>
<d>0.00803</d>
<d>0.001926</d>
<d>0.00803</d>
<d>0.001926</d>
<d>0.00803</d>
<d>0.00803</d>
<d>-0.010281</d>
<d>-0.010281</d>
<d>-0.010281</d>
<d>-0.004177</d>
<d>0.001926</d>
<d>0.014133</d>
<d>0.001926</d>
<d>0.00803</d>
<d>-0.010281</d>
<d>-0.016384</d>
<d>0.014133</d>
<d>0.020237</d>
<d>0.014133</d>
<d>0.014133</d>
<d>-0.004177</d>
<d>0.00803</d>
<d>0.00803</d>
<d>0.001926</d>
<d>-0.004177</d>
<d>-0.004177</d>
<d>0.020237</d>
<d>0.020237</d>
<d>0.014133</d>
<d>0.00803</d>
<d>-0.010281</d>
<d>-0.022488</d>
<d>-0.028591</d>
<d>-0.022488</d>
<d>-0.004177</d>
<d>0.001926</d>
<d>0.00803</d>
<d>-0.004177</d>
<d>-0.010281</d>
<d>0.001926</d>
<d>-0.010281</d>
<d>-0.004177</d>
<d>0.00803</d>
<d>0.02634</d>
<d>0.014133</d>
<d>0.00803</d>
<d>-0.010281</d>
<d>-0.010281</d>
<d>-0.016384</d>
<d>-0.010281</d>
<d>-0.010281</d>
<d>-0.022488</d>
<d>-0.022488</d>
<d>-0.016384</d>
<d>-0.004177</d>
<d>0.001926</d>
<d>-0.010281</d>
<d>-0.010281</d>
<d>0.014133</d>
<d>0.00803</d>
<d>0.00803</d>
<d>0.014133</d>
<d>-0.004177</d>
<d>-0.004177</d>
<d>-0.010281</d>
<d>-0.010281</d>
<d>-0.004177</d>
<d>0.001926</d>
<d>0.014133</d>
<d>0.020237</d>
<d>0.00803</d>
<d>0.001926</d>
<d>-0.010281</d>
<d>0.00803</d>
<d>0.00803</d>
<d>-0.004177</d>
<d>-0.004177</d>
<d>-0.004177</d>
<d>0.001926</d>
<d>0.00803</d>
<d>0.001926</d>
<d>-0.004177</d>
<d>-0.004177</d>
<d>-0.016384</d>
<d>-0.010281</d>
<d>-0.004177</d>
<d>0.001926</d>
<d>-0.504665</d>
<d>-1.12112</d>
<d>-0.400906</d>
<d>0.514622</d>
<d>0.331516</d>
<d>0.11179</d>
<d>0.099583</d>
<d>0.099583</d>
<d>0.081272</d>
<d>0.062962</d>
<d>0.050755</d>
<d>0.044651</d>
<d>0.044651</d>
<d>0.038548</d>
<d>0.02634</d>
<d>0.032444</d>
<d>0.020237</d>
<d>0.014133</d>
<d>0.014133</d>
<d>0.020237</d>
<d>0.020237</d>
<d>0.02634</d>
<d>0.014133</d>
<d>0.00803</d>
<d>0.014133</d>
<d>0.00803</d>
<d>0.00803</d>
<d>0.014133</d>
<d>0.001926</d>
<d>0.014133</d>
<d>0.00803</d>
<d>0.014133</d>
<d>0.00803</d>
<d>0.014133</d>
<d>0.001926</d>
<d>0.00803</d>
<d>0.020237</d>
<d>0.02634</d>
<d>0.02634</d>
<d>0.020237</d>
<d>0.001926</d>
<d>0.001926</d>
<d>-0.004177</d>
<d>-0.004177</d>
<d>-0.010281</d>
<d>0.001926</d>
<d>0.00803</d>
<d>0.00803</d>
<d>0.00803</d>
<d>-0.004177</d>
<d>0.001926</d>
<d>0.001926</d>
<d>-0.010281</d>
<d>0.00803</d>
<d>0.020237</d>
<d>0.014133</d>
<d>0.001926</d>
<d>0.014133</d>
<d>0.00803</d>
<d>0.00803</d>
<d>-0.004177</d>
<d>0.00803</d>
<d>0.001926</d>
<d>0.014133</d>
<d>0.001926</d>
<d>-0.004177</d>
<d>-0.004177</d>
<d>0.001926</d>
<d>-0.010281</d>
<d>-0.004177</d>
<d>-0.010281</d>
<d>-0.010281</d>
<d>-0.010281</d>
<d>-0.016384</d>
<d>-0.010281</d>
<d>-0.016384</d>
<d>-0.016384</d>
<d>-0.028591</d>
<d>-0.028591</d>
<d>-0.016384</d>
<d>-0.016384</d>
<d>-0.022488</d>
<d>-0.022488</d>
<d>-0.028591</d>
<d>-0.046902</d>
<d>-0.034695</d>
<d>-0.034695</d>
<d>-0.040798</d>
<d>-0.034695</d>
<d>-0.034695</d>
<d>-0.028591</d>
<d>-0.010281</d>
<d>-0.022488</d>
<d>-0.028591</d>
<d>-0.040798</d>
<d>-0.046902</d>
<d>-0.046902</d>
<d>-0.040798</d>
<d>-0.046902</d>
<d>-0.053005</d>
<d>-0.040798</d>
<d>-0.034695</d>
<d>-0.053005</d>
<d>-0.046902</d>
<d>-0.046902</d>
<d>-0.046902</d>
<d>-0.040798</d>
<d>-0.046902</d>
<d>-0.046902</d>
<d>-0.046902</d>
<d>-0.040798</d>
<d>-0.046902</d>
<d>-0.053005</d>
<d>-0.028591</d>
<d>-0.053005</d>
<d>-0.046902</d>
<d>-0.053005</d>
<d>-0.059109</d>
<d>-0.046902</d>
<d>-0.046902</d>
<d>-0.053005</d>
<d>-0.040798</d>
<d>-0.040798</d>
<d>-0.034695</d>
<d>-0.034695</d>
<d>-0.022488</d>
<d>-0.034695</d>
<d>-0.040798</d>
<d>-0.040798</d>
<d>-0.040798</d>
<d>-0.053005</d>
<d>-0.040798</d>
<d>-0.059109</d>
<d>-0.053005</d>
<d>-0.040798</d>
<d>-0.046902</d>
<d>-0.046902</d>
<d>-0.046902</d>
<d>-0.071316</d>
<d>-0.077419</d>
<d>-0.077419</d>
<d>-0.077419</d>
<d>-0.065212</d>
<d>-0.071316</d>
<d>-0.077419</d>
<d>-0.077419</d>
<d>-0.059109</d>
<d>-0.046902</d>
<d>-0.046902</d>
<d>-0.034695</d>
<d>-0.046902</d>
<d>-0.046902</d>
<d>-0.053005</d>
<d>-0.053005</d>
<d>-0.028591</d>
<d>-0.034695</d>
<d>-0.034695</d>
<d>-0.028591</d>
<d>-0.040798</d>
<d>-0.046902</d>
<d>-0.034695</d>
<d>-0.040798</d>
<d>-0.028591</d>
<d>-0.022488</d>
<d>-0.028591</d>
<d>-0.028591</d>
<d>-0.028591</d>
<d>-0.059109</d>
<d>-0.046902</d>
<d>-0.046902</d>
<d>-0.046902</d>
<d>-0.046902</d>
<d>-0.046902</d>
<d>-0.040798</d>
<d>-0.040798</d>
<d>-0.034695</d>
<d>-0.046902</d>
<d>-0.034695</d>
<d>-0.028591</d>
<d>-0.046902</d>
<d>-0.059109</d>
<d>-0.059109</d>
<d>-0.059109</d>
<d>-0.053005</d>
<d>-0.046902</d>
<d>-0.046902</d>
<d>-0.040798</d>
<d>-0.034695</d>
<d>-0.028591</d>
<d>-0.034695</d>
<d>-0.034695</d>
<d>-0.034695</d>
<d>-0.040798</d>
<d>-0.046902</d>
<d>-0.040798</d>
<d>-0.034695</d>
<d>-0.046902</d>
<d>-0.040798</d>
<d>-0.046902</d>
<d>-0.059109</d>
<d>-0.040798</d>
<d>-0.034695</d>
<d>-0.022488</d>
<d>-0.034695</d>
<d>-0.028591</d>
<d>-0.028591</d>
<d>-0.028591</d>
<d>-0.040798</d>
<d>-0.040798</d>
<d>-0.034695</d>
<d>-0.040798</d>
<d>-0.022488</d>
<d>-0.028591</d>
<d>-0.034695</d>
<d>-0.028591</d>
<d>-0.022488</d>
<d>-0.040798</d>
<d>-0.034695</d>
<d>-0.022488</d>
<d>-0.022488</d>
<d>-0.016384</d>
<d>-0.010281</d>
<d>-0.010281</d>
<d>-0.010281</d>
<d>-0.022488</d>
<d>-0.028591</d>
<d>-0.022488</d>
<d>-0.022488</d>
<d>-0.028591</d>
<d>-0.040798</d>
<d>-0.040798</d>
<d>-0.028591</d>
<d>-0.034695</d>
<d>-0.046902</d>
<d>-0.046902</d>
<d>-0.053005</d>
<d>-0.046902</d>
<d>-0.053005</d>
<d>-0.040798</d>
<d>-0.028591</d>
<d>-0.022488</d>
<d>-0.016384</d>
<d>-0.010281</d>
<d>-0.004177</d>
<d>-0.010281</d>
<d>0.001926</d>
<d>-0.004177</d>
<d>-0.010281</d>
<d>-0.010281</d>
<d>-0.010281</d>
<d>-0.028591</d>
<d>-0.034695</d>
<d>-0.022488</d>
<d>-0.040798</d>
<d>-0.040798</d>
<d>-0.028591</d>
<d>-0.022488</d>
<d>-0.028591</d>
<d>-0.028591</d>
<d>-0.040798</d>
<d>-0.034695</d>
<d>-0.028591</d>
<d>-0.016384</d>
<d>-0.016384</d>
<d>-0.022488</d>
<d>-0.034695</d>
<d>-0.022488</d>
<d>-0.022488</d>
<d>-0.016384</d>
<d>-0.010281</d>
<d>-0.016384</d>
<d>-0.034695</d>
<d>-0.022488</d>
<d>-0.016384</d>
<d>-0.016384</d>
<d>-0.016384</d>
<d>-0.022488</d>
<d>-0.016384</d>
<d>-0.010281</d>
<d>-0.010281</d>
<d>-0.010281</d>
<d>-0.028591</d>
<d>-0.028591</d>
<d>-0.016384</d>
<d>-0.022488</d>
<d>-0.022488</d>
<d>-0.022488</d>
<d>-0.016384</d>
<d>-0.016384</d>
<d>-0.022488</d>
<d>-0.010281</d>
<d>-0.010281</d>
<d>-0.010281</d>
<d>-0.016384</d>
<d>-0.016384</d>
<d>-0.028591</d>
<d>-0.022488</d>
<d>-0.028591</d>
<d>-0.022488</d>
<d>-0.022488</d>
<d>-0.004177</d>
<d>0.001926</d>
<d>-0.004177</d>
<d>-0.004177</d>
<d>-0.010281</d>
<d>-0.028591</d>
<d>-0.016384</d>
<d>-0.016384</d>
<d>-0.010281</d>
<d>-0.016384</d>
<d>-0.010281</d>
<d>-0.022488</d>
<d>-0.022488</d>
<d>0.001926</d>
<d>-0.010281</d>
<d>-0.004177</d>
<d>-0.004177</d>
<d>-0.004177</d>
<d>-0.004177</d>
<d>-0.010281</d>
<d>-0.010281</d>
<d>-0.016384</d>
<d>-0.022488</d>
<d>-0.034695</d>
<d>-0.034695</d>
<d>-0.034695</d>
<d>-0.034695</d>
<d>-0.040798</d>
<d>-0.028591</d>
<d>-0.022488</d>
<d>-0.010281</d>
<d>0.00803</d>
<d>-0.010281</d>
<d>-0.016384</d>
<d>-0.010281</d>
<d>-0.010281</d>
<d>-0.028591</d>
<d>-0.028591</d>
<d>-0.022488</d>
<d>-0.022488</d>
<d>-0.016384</d>
<d>-0.010281</d>
<d>-0.004177</d>
<d>-0.022488</d>
<d>-0.028591</d>
<d>-0.022488</d>
<d>-0.010281</d>
<d>-0.016384</d>
<d>0.001926</d>
<d>-0.004177</d>
<d>-0.004177</d>
<d>-0.010281</d>
<d>0.001926</d>
<d>0.014133</d>
<d>-0.016384</d>
<d>-0.022488</d>
<d>-0.022488</d>
<d>-0.022488</d>
<d>-0.016384</d>
<d>-0.016384</d>
<d>-0.016384</d>
<d>-0.028591</d>
<d>-0.034695</d>
<d>-0.010281</d>
<d>0.001926</d>
<d>-0.016384</d>
<d>-0.022488</d>
<d>-0.028591</d>
<d>-0.022488</d>
<d>-0.028591</d>
<d>-0.022488</d>
<d>-0.028591</d>
<d>-0.028591</d>
<d>-0.028591</d>
<d>-0.016384</d>
<d>-0.022488</d>
<d>-0.022488</d>
<d>-0.022488</d>
<d>-0.016384</d>
<d>-0.004177</d>
<d>-0.004177</d>
<d>0.00803</d>
<d>0.00803</d>
<d>0.00803</d>
<d>0.001926</d>
<d>-0.004177</d>
<d>0.001926</d>
<d>-0.004177</d>
<d>-0.004177</d>
<d>0.001926</d>
<d>-0.004177</d>
<d>-0.004177</d>
<d>-0.010281</d>
<d>-0.010281</d>
<d>-0.010281</d>
<d>-0.010281</d>
<d>-0.010281</d>
<d>-0.016384</d>
<d>-0.022488</d>
<d>-0.016384</d>
<d>-0.004177</d>
<d>-0.016384</d>
<d>0.001926</d>
<d>-0.010281</d>
<d>0.001926</d>
<d>0.001926</d>
<d>-0.010281</d>
<d>-0.004177</d>
<d>0.00803</d>
<d>0.001926</d>
<d>0.001926</d>
<d>0.001926</d>
<d>0.00803</d>
<d>-0.010281</d>
<d>-0.010281</d>
<d>0.00803</d>
<d>-0.004177</d>
<d>-0.004177</d>
<d>-0.010281</d>
<d>-0.004177</d>
<d>-0.010281</d>
<d>-0.004177</d>
<d>0.020237</d>
<d>0.001926</d>
<d>0.014133</d>
<d>0.001926</d>
<d>-0.016384</d>
<d>-0.010281</d>
<d>0.00803</d>
<d>0.001926</d>
<d>0.00803</d>
<d>-0.010281</d>
<d>-0.010281</d>
<d>-0.004177</d>
<d>-0.010281</d>
<d>-0.004177</d>
<d>-0.004177</d>
<d>0.00803</d>
<d>0.001926</d>
<d>0.001926</d>
<d>0.001926</d>
<d>0.001926</d>
<d>0.014133</d>
<d>0.020237</d>
<d>0.014133</d>
<d>0.00803</d>
<d>0.020237</d>
<d>0.00803</d>
<d>-0.010281</d>
<d>-0.016384</d>
<d>-0.010281</d>
<d>-0.016384</d>
<d>-0.004177</d>
<d>0.00803</d>
<d>0.00803</d>
<d>0.001926</d>
<d>0.00803</d>
<d>0.001926</d>
<d>-0.004177</d>
<d>-0.004177</d>
<d>0.00803</d>
<d>0.001926</d>
<d>-0.004177</d>
<d>-0.016384</d>
<d>-0.010281</d>
<d>-0.010281</d>
<d>-0.028591</d>
<d>0.00803</d>
<d>0.020237</d>
<d>0.02634</d>
<d>-0.004177</d>
<d>-0.022488</d>
<d>-0.022488</d>
<d>-0.016384</d>
<d>-0.010281</d>
<d>-0.004177</d>
<d>0.001926</d>
<d>-0.004177</d>
<d>0.00803</d>
<d>0.00803</d>
<d>-0.010281</d>
<d>-0.004177</d>
<d>-0.004177</d>
<d>-0.004177</d>
<d>-0.010281</d>
<d>-0.004177</d>
<d>-0.010281</d>
<d>-0.010281</d>
<d>0.00803</d>
<d>0.014133</d>
<d>0.020237</d>
<d>0.014133</d>
<d>0.001926</d>
<d>-0.010281</d>
<d>-0.004177</d>
<d>0.014133</d>
<d>0.020237</d>
<d>0.020237</d>
<d>0.02634</d>
<d>-0.004177</d>
<d>0.001926</d>
<d>-0.004177</d>
<d>-0.004177</d>
<d>-0.004177</d>
<d>0.001926</d>
<d>0.001926</d>
<d>-0.004177</d>
<d>0.00803</d>
<d>0.00803</d>
<d>0.001926</d>
<d>0.014133</d>
<d>-0.004177</d>
<d>0.00803</d>
<d>0.001926</d>
<d>-0.004177</d>
<d>0.001926</d>
<d>0.001926</d>
<d>0.001926</d>
<d>-0.004177</d>
<d>-0.004177</d>
<d>-0.016384</d>
<d>-0.022488</d>
<d>-0.016384</d>
<d>0.00803</d>
<d>0.00803</d>
<d>0.020237</d>
<d>0.001926</d>
<d>0.014133</d>
<d>0.020237</d>
<d>0.02634</d>
<d>0.020237</d>
<d>0.001926</d>
<d>-0.016384</d>
<d>-0.004177</d>
<d>0.001926</d>
<d>0.001926</d>
<d>0.001926</d>
<d>0.014133</d>
<d>0.00803</d>
<d>-0.010281</d>
<d>-0.004177</d>
<d>0.001926</d>
<d>-0.004177</d>
<d>-0.016384</d>
<d>-0.010281</d>
<d>-0.004177</d>
<d>-0.004177</d>
<d>-0.004177</d>
<d>-0.004177</d>
<d>0.001926</d>
<d>-0.010281</d>
<d>-0.004177</d>
<d>0.001926</d>
<d>-0.010281</d>
<d>-0.004177</d>
<d>-0.010281</d>
<d>0.001926</d>
<d>0.00803</d>
<d>-0.010281</d>
<d>-0.010281</d>
<d>-0.010281</d>
<d>-0.010281</d>
<d>-0.010281</d>
<d>-0.022488</d>
<d>-0.010281</d>
<d>-0.004177</d>
<d>-0.016384</d>
<d>0.00803</d>
<d>0.00803</d>
<d>0.00803</d>
<d>0.001926</d>
<d>0.001926</d>
<d>-0.010281</d>
<d>-0.004177</d>
<d>-0.010281</d>
<d>-0.010281</d>
<d>-0.010281</d>
<d>0.001926</d>
<d>-0.010281</d>
<d>-0.004177</d>
<d>0.001926</d>
<d>0.00803</d>
<d>0.00803</d>
<d>0.014133</d>
<d>0.014133</d>
<d>0.001926</d>
<d>0.001926</d>
<d>0.001926</d>
<d>0.001926</d>
<d>0.001926</d>
<d>0.001926</d>
<d>0.00803</d>
<d>0.014133</d>
<d>-0.004177</d>
<d>0.00803</d>
<d>0.001926</d>
<d>-0.004177</d>
<d>-0.004177</d>
<d>-0.004177</d>
<d>0.008474</d>
<d>0.002371</d>
<d>-0.00373</d>
<d>0.002371</d>
<d>-0.00373</d>
<d>-0.00373</d>
<d>-0.00373</d>
<d>-0.00984</d>
<d>-0.00373</d>
<d>-0.00373</d>
<d>0.002371</d>
<d>0.002371</d>
<d>0.008474</d>
<d>0.014578</d>
<d>0.008474</d>
<d>0.002371</d>
<d>-0.00984</d>
<d>-0.00984</d>
<d>-0.00984</d>
<d>-0.00984</d>
<d>-0.00984</d>
<d>-0.00373</d>
<d>0.002371</d>
<d>-0.00373</d>
<d>0.002371</d>
<d>-0.00984</d>
<d>0.008474</d>
<d>-0.00373</d>
<d>-0.00373</d>
<d>-0.00373</d>
<d>-0.01594</d>
<d>-0.00373</d>
<d>-0.00984</d>
<d>-0.00373</d>
<d>0.002371</d>
<d>-0.00373</d>
<d>-0.00373</d>
<d>-0.00373</d>
<d>-0.00984</d>
<d>0.002371</d>
<d>0.002371</d>
<d>0.008474</d>
<d>-0.00373</d>
<d>-0.00373</d>
<d>-0.00373</d>
<d>0.008474</d>
<d>0.014578</d>
<d>0.008474</d>
<d>0.002371</d>
<d>0.002371</d>
<d>-0.00373</d>
<d>0.002371</d>
<d>-0.00373</d>
<d>-0.00373</d>
<d>-0.00373</d>
<d>-0.00984</d>
<d>0.008474</d>
<d>0.008474</d>
<d>0.008474</d>
<d>0.008474</d>
<d>0.002371</d>
<d>-0.00373</d>
<d>-0.00373</d>
<d>-0.00984</d>
<d>0.002371</d>
<d>-0.00373</d>
<d>-0.00373</d>
<d>0.002371</d>
<d>0.008474</d>
<d>0.008474</d>
<d>0.002371</d>
<d>-0.01594</d>
<d>-0.02204</d>
<d>-0.02204</d>
<d>-0.02204</d>
<d>-0.00984</d>
<d>-0.00984</d>
<d>-0.00984</d>
<d>-0.00984</d>
<d>-0.00984</d>
<d>-0.00984</d>
<d>-0.00984</d>
<d>-0.00984</d>
<d>-0.00984</d>
<d>0.002371</d>
<d>-0.00373</d>
<d>-0.00373</d>
<d>-0.00373</d>
<d>-0.00373</d>
<d>-0.02204</d>
<d>-0.01594</d>
<d>-0.00984</d>
<d>-0.00373</d>
<d>0.002371</d>
<d>0.002371</d>
<d>0.008474</d>
<d>-0.00373</d>
<d>0.002371</d>
<d>0.002371</d>
<d>0.002371</d>
<d>0.002371</d>
<d>-0.00373</d>
<d>0.002371</d>
<d>0.002371</d>
<d>0.002371</d>
<d>0.002371</d>
<d>-0.00373</d>
<d>0.002371</d>
<d>-0.00373</d>
<d>-0.00373</d>
<d>0.002371</d>
<d>-0.00373</d>
<d>-0.00373</d>
<d>-0.00373</d>
<d>-0.00373</d>
<d>-0.00984</d>
<d>-0.00984</d>
<d>-0.01594</d>
<d>-0.00373</d>
<d>0.002371</d>
<d>-0.00984</d>
<d>-0.00984</d>
<d>-0.00984</d>
<d>-0.00373</d>
<d>-0.01594</d>
<d>-0.00373</d>
<d>-0.00373</d>
<d>0.002371</d>
<d>0.008474</d>
<d>-0.00373</d>
<d>0.008474</d>
<d>0.008474</d>
<d>-0.00373</d>
<d>0.002371</d>
<d>-0.00373</d>
<d>0.002371</d>
<d>0.014578</d>
<d>0.008474</d>
<d>0.008474</d>
<d>0.008474</d>
<d>0.002371</d>
<d>-0.00373</d>
<d>-0.00373</d>
<d>0.002371</d>
<d>0.008474</d>
<d>0.008474</d>
<d>-0.00373</d>
<d>-0.00373</d>
<d>0.014578</d>
<d>0.002371</d>
<d>0.002371</d>
<d>-0.00373</d>
<d>-0.00373</d>
<d>0.008474</d>
<d>0.002371</d>
<d>0.008474</d>
<d>0.002371</d>
<d>-0.00373</d>
<d>0.008474</d>
<d>0.014578</d>
<d>0.014578</d>
<d>0.014578</d>
<d>0.002371</d>
<d>0.002371</d>
<d>-0.00373</d>
<d>-0.00373</d>
<d>0.008474</d>
<d>0.002371</d>
<d>-0.00984</d>
<d>-0.00984</d>
<d>-0.01594</d>
<d>-0.00373</d>
<d>0.014578</d>
<d>0.008474</d>
<d>0.008474</d>
<d>0.002371</d>
<d>0.002371</d>
<d>0.002371</d>
<d>-0.00373</d>
<d>0.008474</d>
<d>0.002371</d>
<d>0.014578</d>
<d>0.014578</d>
<d>0.008474</d>
<d>0.014578</d>
<d>0.002371</d>
<d>0.002371</d>
<d>-0.00373</d>
<d>-0.00373</d>
<d>0.002371</d>
<d>0.002371</d>
<d>-0.00373</d>
<d>-0.00373</d>
<d>-0.01594</d>
<d>-0.01594</d>
<d>-0.00984</d>
<d>-0.00984</d>
<d>-0.00373</d>
<d>-0.00373</d>
<d>0.002371</d>
<d>0.002371</d>
<d>-0.00373</d>
<d>-0.00373</d>
<d>-0.00984</d>
<d>0.002371</d>
<d>-0.00373</d>
<d>-0.00373</d>
<d>-0.00373</d>
<d>-0.00984</d>
<d>-0.00984</d>
<d>-0.00373</d>
<d>-0.00373</d>
<d>0.002371</d>
<d>0.002371</d>
<d>0.002371</d>
<d>0.002371</d>
<d>0.008474</d>
<d>0.008474</d>
<d>0.014578</d>
<d>-0.00373</d>
<d>0.008474</d>
<d>0.008474</d>
<d>0.008474</d>
<d>0.014578</d>
<d>0.002371</d>
<d>0.002371</d>
<d>-0.00373</d>
<d>0.002371</d>
<d>0.008474</d>
<d>-0.00373</d>
<d>0.002371</d>
<d>-0.00984</d>
<d>-0.01594</d>
<d>-0.01594</d>
<d>-0.00984</d>
<d>0.002371</d>
<d>0.002371</d>
<d>0.002371</d>
<d>-0.00373</d>
<d>0.008474</d>
<d>0.008474</d>
<d>0.008474</d>
<d>0.002371</d>
<d>0.002371</d>
<d>0.008474</d>
<d>0.014578</d>
<d>0.014578</d>
<d>0.008474</d>
<d>0.008474</d>
<d>0.002371</d>
<d>0.014578</d>
<d>0.020681</d>
<d>0.026785</d>
<d>0.026785</d>
<d>0.014578</d>
<d>0.014578</d>
<d>0.002371</d>
<d>-0.00373</d>
<d>-0.00373</d>
<d>-0.01594</d>
<d>-0.01594</d>
<d>-0.01594</d>
<d>-0.00373</d>
<d>-0.00373</d>
<d>0.002371</d>
<d>0.002371</d>
<d>0.002371</d>
<d>-0.00984</d>
<d>0.008474</d>
<d>0.008474</d>
<d>0.002371</d>
<d>0.002371</d>
<d>-0.00984</d>
<d>0.002371</d>
<d>0.002371</d>
<d>0.002371</d>
<d>0.020681</d>
<d>0.020681</d>
<d>0.020681</d>
<d>0.014578</d>
<d>0.002371</d>
<d>-0.00373</d>
<d>-0.01594</d>
<d>-0.00373</d>
<d>0.002371</d>
<d>0.008474</d>
<d>0.008474</d>
<d>0.008474</d>
<d>0.002371</d>
<d>0.002371</d>
<d>0.008474</d>
<d>0.014578</d>
<d>0.020681</d>
<d>0.008474</d>
<d>0.020681</d>
<d>0.020681</d>
<d>0.026785</d>
<d>0.020681</d>
<d>0.008474</d>
<d>0.002371</d>
<d>-0.00373</d>
<d>0.008474</d>
<d>0.002371</d>
<d>0.002371</d>
<d>0.002371</d>
<d>-0.00373</d>
<d>0.002371</d>
<d>-0.00373</d>
<d>0.002371</d>
<d>0.002371</d>
<d>-0.00373</d>
<d>-0.00984</d>
<d>-0.00984</d>
<d>-0.00984</d>
<d>-0.00373</d>
<d>0.008474</d>
<d>0.002371</d>
<d>0.002371</d>
<d>-0.00373</d>
<d>0.008474</d>
<d>0.002371</d>
<d>-0.00373</d>
<d>0.002371</d>
<d>-0.00373</d>
<d>0.002371</d>
<d>0.008474</d>
<d>-0.00373</d>
<d>0.008474</d>
<d>0.002371</d>
<d>-0.00373</d>
<d>0.002371</d>
<d>0.008474</d>
<d>0.008474</d>
<d>0.002371</d>
<d>-0.00373</d>
<d>0.002371</d>
<d>0.002371</d>
<d>0.002371</d>
<d>0.002371</d>
<d>-0.00984</d>
<d>-0.00984</d>
<d>0.002371</d>
<d>0.008474</d>
<d>0.008474</d>
<d>0.008474</d>
<d>0.008474</d>
<d>0.002371</d>
<d>0.008474</d>
<d>0.002371</d>
<d>0.002371</d>
<d>-0.00373</d>
<d>-0.00373</d>
<d>0.002371</d>
<d>0.002371</d>
<d>-0.00373</d>
<d>0.002371</d>
<d>-0.00984</d>
<d>-0.00984</d>
<d>-0.00984</d>
<d>-0.00984</d>
<d>-0.00373</d>
<d>0.002371</d>
<d>0.014578</d>
<d>0.008474</d>
<d>0.008474</d>
<d>0.014578</d>
<d>0.014578</d>
<d>0.008474</d>
<d>0.002371</d>
<d>-0.00373</d>
<d>0.002371</d>
<d>0.008474</d>
<d>-0.00373</d>
<d>-0.00373</d>
<d>0.002371</d>
<d>0.002371</d>
<d>0.002371</d>
<d>0.002371</d>
<d>0.008474</d>
<d>0.014578</d>
<d>0.020681</d>
<d>0.002371</d>
<d>-0.00373</d>
<d>0.008474</d>
<d>0.002371</d>
<d>0.002371</d>
<d>0.008474</d>
<d>0.014578</d>
<d>0.020681</d>
<d>0.014578</d>
<d>0.008474</d>
<d>0.002371</d>
<d>0.008474</d>
<d>0.002371</d>
<d>0.002371</d>
<d>0.008474</d>
<d>0.008474</d>
<d>0.008474</d>
<d>0.020681</d>
<d>0.008474</d>
<d>0.002371</d>
<d>0.002371</d>
<d>-0.00373</d>
<d>0.002371</d>
<d>0.002371</d>
<d>-0.00984</d>
<d>-0.00373</d>
<d>-0.01594</d>
<d>0.002371</d>
<d>0.002371</d>
<d>0.008474</d>
<d>0.008474</d>
<d>0.002371</d>
<d>0.002371</d>
<d>0.008474</d>
<d>0.008474</d>
<d>0.014578</d>
<d>0.014578</d>
<d>0.008474</d>
<d>0.008474</d>
<d>0.002371</d>
<d>-0.00373</d>
<d>-0.00373</d>
<d>-0.00373</d>
<d>0.002371</d>
<d>-0.00984</d>
<d>-0.00984</d>
<d>-0.00984</d>
<d>-0.01594</d>
<d>-0.00984</d>
<d>-0.00984</d>
<d>-0.00373</d>
<d>0.008474</d>
<d>0.008474</d>
<d>0.008474</d>
<d>0.002371</d>
<d>-0.00373</d>
<d>-0.00373</d>
<d>-0.00373</d>
<d>-0.00373</d>
<d>-0.00373</d>
<d>-0.00984</d>
<d>-0.00373</d>
<d>-0.00984</d>
<d>-0.00373</d>
<d>0.002371</d>
<d>-0.00373</d>
<d>0.008474</d>
<d>0.008474</d>
<d>0.014578</d>
<d>0.008474</d>
<d>0.008474</d>
<d>0.002371</d>
<d>0.002371</d>
<d>0.008474</d>
<d>-0.00373</d>
<d>0.002371</d>
<d>0.014578</d>
<d>0.002371</d>
<d>0.002371</d>
<d>-0.00373</d>
<d>0.002371</d>
<d>0.002371</d>
<d>0.002371</d>
<d>-0.00984</d>
<d>-0.00984</d>
<d>-0.00984</d>
<d>0.002371</d>
<d>0.002371</d>
<d>-0.00373</d>
<d>-0.00373</d>
<d>-0.00984</d>
<d>0.002371</d>
<d>0.008474</d>
<d>0.002371</d>
<d>0.002371</d>
<d>-0.00984</d>
<d>0.002371</d>
<d>0.002371</d>
<d>-0.00373</d>
<d>0.002371</d>
<d>-0.00984</d>
<d>0.002371</d>
<d>0.002371</d>
<d>0.008474</d>
<d>0.008474</d>
<d>0.008474</d>
<d>0.002371</d>
<d>-0.00373</d>
<d>-0.00373</d>
<d>0.002371</d>
<d>-0.00373</d>
<d>-0.00373</d>
<d>-0.00373</d>
<d>-0.00984</d>
<d>-0.00984</d>
<d>-0.00984</d>
<d>-0.00984</d>
<d>-0.00373</d>
<d>-0.00984</d>
<d>0.002371</d>
<d>-0.00373</d>
<d>0.002371</d>
<d>-0.00373</d>
<d>-0.00373</d>
<d>0.002371</d>
<d>0.002371</d>
<d>0.002371</d>
<d>0.008474</d>
<d>0.002371</d>
<d>-0.00373</d>
<d>-0.00373</d>
<d>-0.00984</d>
<d>-0.00373</d>
<d>-0.00373</d>
<d>-0.00373</d>
<d>-0.00373</d>
<d>0.002371</d>
<d>0.002371</d>
<d>-0.00373</d>
<d>-0.00984</d>
<d>-0.00373</d>
<d>-0.00373</d>
<d>0.002371</d>
<d>-0.00373</d>
<d>0.002371</d>
<d>-0.00373</d>
<d>-0.00373</d>
<d>0.008474</d>
<d>-0.00373</d>
<d>-0.00373</d>
<d>-0.00373</d>
<d>-0.00373</d>
<d>-0.00984</d>
<d>-0.00373</d>
<d>-0.00373</d>
<d>0.002371</d>
<d>0.008474</d>
<d>0.002371</d>
<d>0.002371</d>
<d>0.002371</d>
<d>0.014578</d>
<d>0.002371</d>
<d>0.008474</d>
<d>0.008474</d>
<d>0.014578</d>
<d>0.020681</d>
<d>0.014578</d>
<d>0.008474</d>
<d>0.002371</d>
<d>0.008474</d>
<d>0.014578</d>
<d>0.014578</d>
<d>0.002371</d>
<d>0.002371</d>
<d>0.008474</d>
<d>0.008474</d>
<d>0.020681</d>
<d>0.008474</d>
<d>0.014578</d>
<d>0.008474</d>
<d>0.002371</d>
<d>0.002371</d>
<d>0.008474</d>
<d>0.008474</d>
<d>0.002371</d>
<d>-0.00373</d>
<d>-0.00373</d>
<d>0.002371</d>
<d>0.008474</d>
<d>0.008474</d>
<d>0.002371</d>
<d>-0.00373</d>
<d>-0.00373</d>
<d>-0.00373</d>
<d>0.002371</d>
<d>0.014578</d>
<d>0.014578</d>
<d>0.020681</d>
<d>0.020681</d>
<d>0.020681</d>
<d>0.020681</d>
<d>0.008474</d>
<d>-0.00373</d>
<d>-0.00373</d>
<d>-0.00373</d>
<d>0.002371</d>
<d>0.008474</d>
<d>0.014578</d>
<d>0.008474</d>
<d>0.020681</d>
<d>0.020681</d>
<d>0.020681</d>
<d>0.014578</d>
<d>0.008474</d>
<d>0.002371</d>
<d>-0.00373</d>
<d>-0.00373</d>
<d>-0.00373</d>
<d>0.008474</d>
<d>0.020681</d>
<d>0.020681</d>
<d>0.026785</d>
<d>0.020681</d>
<d>0.008474</d>
<d>0.002371</d>
<d>0.002371</d>
<d>0.002371</d>
<d>0.008474</d>
<d>0.014578</d>
<d>0.020681</d>
<d>0.020681</d>
<d>0.020681</d>
<d>0.014578</d>
<d>0.020681</d>
<d>0.014578</d>
<d>0.020681</d>
<d>0.014578</d>
<d>0.008474</d>
<d>0.002371</d>
<d>-0.00984</d>
<d>-0.00373</d>
<d>-0.00373</d>
<d>0.008474</d>
<d>-0.00373</d>
<d>0.002371</d>
<d>0.008474</d>
<d>0.002371</d>
<d>-0.00984</d>
<d>-0.02204</d>
<d>-0.01594</d>
<d>-0.01594</d>
<d>-0.00373</d>
<d>0.008474</d>
<d>0.020681</d>
<d>0.020681</d>
<d>0.026785</d>
<d>0.014578</d>
<d>0.008474</d>
<d>0.008474</d>
<d>0.002371</d>
<d>0.008474</d>
<d>0.008474</d>
<d>0.002371</d>
<d>0.014578</d>
<d>0.002371</d>
<d>-0.00984</d>
<d>-0.01594</d>
<d>-0.00984</d>
<d>-0.01594</d>
<d>-0.00984</d>
<d>-0.00373</d>
<d>-0.00984</d>
<d>0.002371</d>
<d>-0.00373</d>
<d>-0.00373</d>
<d>0.008474</d>
<d>0.008474</d>
<d>0.008474</d>
<d>0.008474</d>
<d>0.014578</d>
<d>0.008474</d>
<d>0.002371</d>
<d>0.002371</d>
<d>0.002371</d>
<d>-0.00373</d>
<d>0.008474</d>
<d>0.002371</d>
<d>-0.01594</d>
<d>-0.00984</d>
<d>-0.00984</d>
<d>-0.00373</d>
<d>-0.00373</d>
<d>-0.00984</d>
<d>-0.00984</d>
<d>-0.00984</d>
<d>-0.00373</d>
<d>-0.00984</d>
<d>-0.00984</d>
<d>-0.00373</d>
<d>0.002371</d>
<d>0.008474</d>
<d>0.008474</d>
<d>0.002371</d>
<d>0.008474</d>
<d>0.002371</d>
<d>-0.01594</d>
<d>-0.00373</d>
<d>-0.00984</d>
<d>0.002371</d>
<d>0.002371</d>
<d>-0.00373</d>
<d>-0.00984</d>
<d>-0.00373</d>
<d>0.002371</d>
<d>0.008474</d>
<d>0.014578</d>
<d>0.008474</d>
<d>0.008474</d>
<d>0.002371</d>
<d>0.008474</d>
<d>0.008474</d>
<d>0.020681</d>
<d>0.014578</d>
<d>0.020681</d>
<d>0.014578</d>
<d>0.014578</d>
<d>0.020681</d>
<d>0.014578</d>
<d>0.014578</d>
<d>0.002371</d>
<d>0.014578</d>
<d>0.014578</d>
<d>0.008474</d>
<d>0.002371</d>
<d>0.008474</d>
<d>0.002371</d>
<d>0.008474</d>
<d>0.008474</d>
<d>-0.00373</d>
<d>0.002371</d>
<d>0.002371</d>
<d>0.002371</d>
<d>0.002371</d>
<d>0.002371</d>
<d>-0.00373</d>
<d>-0.00373</d>
<d>0.008474</d>
<d>0.002371</d>
<d>-0.00373</d>
<d>-0.00984</d>
<d>-0.01594</d>
<d>-0.00984</d>
<d>-0.00984</d>
<d>0.002371</d>
<d>0.002371</d>
<d>0.014578</d>
<d>0.008474</d>
<d>0.008474</d>
<d>0.008474</d>
<d>0.020681</d>
<d>0.002371</d>
<d>-0.00373</d>
<d>-0.00984</d>
<d>-0.00984</d>
<d>-0.00373</d>
<d>-0.00373</d>
<d>-0.00373</d>
<d>0.002371</d>
<d>-0.00373</d>
<d>-0.00373</d>
<d>0.002371</d>
<d>0.002371</d>
<d>0.002371</d>
<d>-0.00373</d>
<d>-0.00984</d>
<d>-0.00373</d>
<d>0.002371</d>
<d>0.008474</d>
<d>0.008474</d>
<d>-0.00984</d>
<d>0.002371</d>
<d>-0.00373</d>
<d>0.002371</d>
<d>0.002371</d>
<d>-0.00984</d>
<d>0.002371</d>
<d>0.008474</d>
<d>0.008474</d>
<d>0.008474</d>
<d>0.002371</d>
<d>0.002371</d>
<d>-0.00373</d>
<d>0.008474</d>
<d>0.002371</d>
<d>0.002371</d>
<d>-0.00373</d>
<d>-0.01594</d>
<d>-0.01594</d>
<d>-0.00984</d>
<d>0.002371</d>
<d>0.008474</d>
<d>0.008474</d>
<d>0.014578</d>
<d>0.014578</d>
<d>0.014578</d>
<d>0.014578</d>
<d>0.008474</d>
<d>0.002371</d>
<d>0.002371</d>
<d>0.008474</d>
<d>0.014578</d>
<d>0.020681</d>
<d>0.002371</d>
<d>0.008474</d>
<d>-0.00373</d>
<d>-0.00373</d>
<d>0.002371</d>
<d>-0.00373</d>
<d>-0.00373</d>
<d>-0.00984</d>
<d>-0.04035</d>
<d>-0.14411</d>
<d>-0.19294</d>
<d>-0.08308</d>
<d>0.118338</d>
<d>0.374685</d>
<d>0.508963</d>
<d>0.429617</d>
<d>0.252615</d>
<d>0.100027</d>
<d>0.014578</d>
<d>-0.00984</d>
<d>-0.00373</d>
<d>0.002371</d>
<d>0.002371</d>
<d>-0.00373</d>
<d>0.008474</d>
<d>0.002371</d>
<d>0.014578</d>
<d>0.014578</d>
<d>0.014578</d>
<d>0.008474</d>
<d>0.008474</d>
<d>0.014578</d>
<d>0.008474</d>
<d>0.002371</d>
<d>0.008474</d>
<d>-0.00373</d>
<d>-0.00373</d>
<d>0.002371</d>
<d>0.014578</d>
<d>0.014578</d>
<d>0.008474</d>
<d>0.008474</d>
<d>0.002371</d>
<d>-0.00373</d>
<d>0.008474</d>
<d>0.008474</d>
<d>0.002371</d>
<d>0.002371</d>
<d>-0.00373</d>
<d>0.002371</d>
<d>0.002371</d>
<d>0.008474</d>
<d>0.002371</d>
<d>0.002371</d>
<d>0.014578</d>
<d>0.008474</d>
<d>-0.00373</d>
<d>0.002371</d>
<d>0.002371</d>
<d>0.002371</d>
<d>-0.00373</d>
<d>-0.00373</d>
<d>0.002371</d>
<d>-0.00373</d>
<d>0.002371</d>
<d>0.002371</d>
<d>0.008474</d>
<d>0.008474</d>
<d>0.008474</d>
<d>0.002371</d>
<d>0.002371</d>
<d>-0.00373</d>
<d>0.008474</d>
<d>0.008474</d>
<d>-0.00373</d>
<d>0.002371</d>
<d>-0.01594</d>
<d>-0.00373</d>
<d>-0.00984</d>
<d>-0.00984</d>
<d>-0.00373</d>
<d>-0.01594</d>
<d>-0.01594</d>
<d>-0.01594</d>
<d>-0.02204</d>
<d>-0.00373</d>
<d>-0.00984</d>
<d>-0.00984</d>
<d>0.002371</d>
<d>0.002371</d>
<d>0.014578</d>
<d>0.008474</d>
<d>-0.00373</d>
<d>-0.00373</d>
<d>-0.00984</d>
<d>-0.00984</d>
<d>-0.01594</d>
<d>-0.01594</d>
<d>-0.02204</d>
<d>-0.01594</d>
<d>-0.00373</d>
<d>-0.00984</d>
<d>-0.01594</d>
<d>-0.02204</d>
<d>-0.02815</d>
<d>-0.02815</d>
<d>-0.03425</d>
<d>-0.03425</d>
<d>-0.02204</d>
<d>-0.02204</d>
<d>-0.02815</d>
<d>-0.02815</d>
<d>-0.04035</d>
<d>-0.02204</d>
<d>-0.02204</d>
<d>-0.02815</d>
<d>-0.02204</d>
<d>-0.01594</d>
<d>-0.02204</d>
<d>-0.01594</d>
<d>-0.00984</d>
<d>-0.00373</d>
<d>-0.01594</d>
<d>-0.01594</d>
<d>-0.00373</d>
<d>-0.01594</d>
<d>-0.00984</d>
<d>-0.01594</d>
<d>-0.02204</d>
<d>-0.02815</d>
<d>-0.03425</d>
<d>-0.03425</d>
<d>-0.04646</d>
<d>-0.04035</d>
<d>-0.05256</d>
<d>-0.05256</d>
<d>-0.04646</d>
<d>-0.04646</d>
<d>-0.05256</d>
<d>-0.05256</d>
<d>-0.04646</d>
<d>-0.04035</d>
<d>-0.02815</d>
<d>-0.02815</d>
<d>-0.03425</d>
<d>-0.04035</d>
<d>-0.04646</d>
<d>-0.05866</d>
<d>-0.05866</d>
<d>-0.05256</d>
<d>-0.05866</d>
<d>-0.05256</d>
<d>-0.06477</d>
<d>-0.07087</d>
<d>-0.07697</d>
<d>-0.07087</d>
<d>-0.07087</d>
<d>-0.07697</d>
<d>-0.07087</d>
<d>-0.07087</d>
<d>-0.07087</d>
<d>-0.07697</d>
<d>-0.08308</d>
<d>-0.08308</d>
<d>-0.07697</d>
<d>-0.07697</d>
<d>-0.08308</d>
<d>-0.07087</d>
<d>-0.07697</d>
<d>-0.06477</d>
<d>-0.07697</d>
<d>-0.08918</d>
<d>-0.08308</d>
<d>-0.08308</d>
<d>-0.08308</d>
<d>-0.08308</d>
<d>-0.08918</d>
<d>-0.08918</d>
<d>-0.09529</d>
<d>-0.08918</d>
<d>-0.08918</d>
<d>-0.08918</d>
<d>-0.08918</d>
<d>-0.10139</d>
<d>-0.10139</d>
<d>-0.10139</d>
<d>-0.10749</d>
<d>-0.08918</d>
<d>-0.08918</d>
<d>-0.09529</d>
<d>-0.09529</d>
<d>-0.09529</d>
<d>-0.10749</d>
<d>-0.10749</d>
<d>-0.1197</d>
<d>-0.10749</d>
<d>-0.1197</d>
<d>-0.1136</d>
<d>-0.10139</d>
<d>-0.1136</d>
<d>-0.10139</d>
<d>-0.10139</d>
<d>-0.10749</d>
<d>-0.10139</d>
<d>-0.10139</d>
<d>-0.10139</d>
<d>-0.1136</d>
<d>-0.10139</d>
<d>-0.1197</d>
<d>-0.1197</d>
<d>-0.1258</d>
<d>-0.1258</d>
<d>-0.1258</d>
<d>-0.1258</d>
<d>-0.1197</d>
<d>-0.10749</d>
<d>-0.10139</d>
<d>-0.1197</d>
<d>-0.1258</d>
<d>-0.13191</d>
<d>-0.1258</d>
<d>-0.1258</d>
<d>-0.1258</d>
<d>-0.10749</d>
<d>-0.10749</d>
<d>-0.10139</d>
<d>-0.10749</d>
<d>-0.1197</d>
<d>-0.1136</d>
<d>-0.1136</d>
<d>-0.10749</d>
<d>-0.09529</d>
<d>-0.10139</d>
<d>-0.09529</d>
<d>-0.10139</d>
<d>-0.10749</d>
<d>-0.09529</d>
<d>-0.10749</d>
<d>-0.1136</d>
<d>-0.10749</d>
<d>-0.10139</d>
<d>-0.10139</d>
<d>-0.10749</d>
<d>-0.1136</d>
<d>-0.10749</d>
<d>-0.10749</d>
<d>-0.10139</d>
<d>-0.10749</d>
<d>-0.1136</d>
<d>-0.10139</d>
<d>-0.10749</d>
<d>-0.10139</d>
<d>-0.10749</d>
<d>-0.10139</d>
<d>-0.10749</d>
<d>-0.1136</d>
<d>-0.10749</d>
<d>-0.10749</d>
<d>-0.10139</d>
<d>-0.08918</d>
<d>-0.08918</d>
<d>-0.08308</d>
<d>-0.08308</d>
<d>-0.08308</d>
<d>-0.08918</d>
<d>-0.09529</d>
<d>-0.09529</d>
<d>-0.08918</d>
<d>-0.09529</d>
<d>-0.08308</d>
<d>-0.08308</d>
<d>-0.08308</d>
<d>-0.08918</d>
<d>-0.10139</d>
<d>-0.08918</d>
<d>-0.08918</d>
<d>-0.09529</d>
<d>-0.09529</d>
<d>-0.10139</d>
<d>-0.10749</d>
<d>-0.1136</d>
<d>-0.10749</d>
<d>-0.10139</d>
<d>-0.09529</d>
<d>-0.09529</d>
<d>-0.08918</d>
<d>-0.08918</d>
<d>-0.08918</d>
<d>-0.08918</d>
<d>-0.08918</d>
<d>-0.09529</d>
<d>-0.10139</d>
<d>-0.09529</d>
<d>-0.09529</d>
<d>-0.08918</d>
<d>-0.08918</d>
<d>-0.09529</d>
<d>-0.09529</d>
<d>-0.10139</d>
<d>-0.08918</d>
<d>-0.09529</d>
<d>-0.09529</d>
<d>-0.08918</d>
<d>-0.08918</d>
<d>-0.08918</d>
<d>-0.08918</d>
<d>-0.08918</d>
<d>-0.08918</d>
<d>-0.09529</d>
<d>-0.09529</d>
<d>-0.10139</d>
<d>-0.09529</d>
<d>-0.10749</d>
<d>-0.10139</d>
<d>-0.10749</d>
<d>-0.09529</d>
<d>-0.08918</d>
<d>-0.08918</d>
<d>-0.08308</d>
<d>-0.08918</d>
<d>-0.08308</d>
<d>-0.08308</d>
<d>-0.08308</d>
<d>-0.08918</d>
<d>-0.08918</d>
<d>-0.09529</d>
<d>-0.08918</d>
<d>-0.08918</d>
<d>-0.09529</d>
<d>-0.10749</d>
<d>-0.10749</d>
<d>-0.10749</d>
<d>-0.10139</d>
<d>-0.10139</d>
<d>-0.10139</d>
<d>-0.08918</d>
<d>-0.08918</d>
<d>-0.08918</d>
<d>-0.08918</d>
<d>-0.09529</d>
<d>-0.08918</d>
<d>-0.08918</d>
<d>-0.09529</d>
<d>-0.08918</d>
<d>-0.08918</d>
<d>-0.08308</d>
<d>-0.07697</d>
<d>-0.07697</d>
<d>-0.07697</d>
<d>-0.07697</d>
<d>-0.07697</d>
<d>-0.08308</d>
<d>-0.08308</d>
<d>-0.07697</d>
<d>-0.08918</d>
<d>-0.08308</d>
<d>-0.08308</d>
<d>-0.08308</d>
<d>-0.08308</d>
<d>-0.08308</d>
<d>-0.07697</d>
<d>-0.08308</d>
<d>-0.08308</d>
<d>-0.08918</d>
<d>-0.08308</d>
<d>-0.08918</d>
<d>-0.08918</d>
<d>-0.08308</d>
<d>-0.08308</d>
<d>-0.07697</d>
<d>-0.08308</d>
<d>-0.08308</d>
<d>-0.07697</d>
<d>-0.07697</d>
<d>-0.07697</d>
<d>-0.08918</d>
<d>-0.08918</d>
<d>-0.08308</d>
<d>-0.07697</d>
<d>-0.07087</d>
<d>-0.08308</d>
<d>-0.07697</d>
<d>-0.08308</d>
<d>-0.07697</d>
<d>-0.07697</d>
<d>-0.07697</d>
<d>-0.08308</d>
<d>-0.08308</d>
<d>-0.08918</d>
<d>-0.08918</d>
<d>-0.08308</d>
<d>-0.07087</d>
<d>-0.05866</d>
<d>-0.07087</d>
<d>-0.07087</d>
<d>-0.07087</d>
<d>-0.07087</d>
<d>-0.05866</d>
<d>-0.06477</d>
<d>-0.06477</d>
<d>-0.06477</d>
<d>-0.05866</d>
<d>-0.06477</d>
<d>-0.06477</d>
<d>-0.05866</d>
<d>-0.07087</d>
<d>-0.06477</d>
<d>-0.06477</d>
<d>-0.05866</d>
<d>-0.05256</d>
<d>-0.05256</d>
<d>-0.05256</d>
<d>-0.05256</d>
<d>-0.05256</d>
<d>-0.06477</d>
<d>-0.07697</d>
<d>-0.07697</d>
<d>-0.07697</d>
<d>-0.07087</d>
<d>-0.06477</d>
<d>-0.06477</d>
<d>-0.06477</d>
<d>-0.06477</d>
<d>-0.05256</d>
<d>-0.05256</d>
<d>-0.06477</d>
<d>-0.07697</d>
<d>-0.07697</d>
<d>-0.08308</d>
<d>-0.07087</d>
<d>-0.06477</d>
<d>-0.05866</d>
<d>-0.05256</d>
<d>-0.05866</d>
<d>-0.05866</d>
<d>-0.07087</d>
<d>-0.07697</d>
<d>-0.08308</d>
<d>-0.07087</d>
<d>-0.06477</d>
<d>-0.05256</d>
<d>-0.04646</d>
<d>-0.04646</d>
<d>-0.04035</d>
<d>-0.05256</d>
<d>-0.05866</d>
<d>-0.04646</d>
<d>-0.05256</d>
<d>-0.05256</d>
<d>-0.05866</d>
<d>-0.05866</d>
<d>-0.05866</d>
<d>-0.05256</d>
<d>-0.05256</d>
<d>-0.05256</d>
<d>-0.05256</d>
<d>-0.04646</d>
<d>-0.04646</d>
<d>-0.04646</d>
<d>-0.04646</d>
<d>-0.05256</d>
<d>-0.06477</d>
<d>-0.07087</d>
<d>-0.07697</d>
<d>-0.06477</d>
<d>-0.04646</d>
<d>-0.04035</d>
<d>-0.04646</d>
<d>-0.04035</d>
<d>-0.04035</d>
<d>-0.04646</d>
<d>-0.05866</d>
<d>-0.05866</d>
<d>-0.06477</d>
<d>-0.05256</d>
<d>-0.05256</d>
<d>-0.04646</d>
<d>-0.04646</d>
<d>-0.03425</d>
<d>-0.04646</d>
<d>-0.04646</d>
<d>-0.03425</d>
<d>-0.04035</d>
<d>-0.04035</d>
<d>-0.04646</d>
<d>-0.04646</d>
<d>-0.04646</d>
<d>-0.04035</d>
<d>-0.04035</d>
<d>-0.04035</d>
<d>-0.05256</d>
<d>-0.04646</d>
<d>-0.04646</d>
<d>-0.03425</d>
<d>-0.04035</d>
<d>-0.04646</d>
<d>-0.04646</d>
<d>-0.04646</d>
<d>-0.04035</d>
<d>-0.02204</d>
<d>-0.02815</d>
<d>-0.03425</d>
<d>-0.04035</d>
<d>-0.04035</d>
<d>-0.04035</d>
<d>-0.05256</d>
<d>-0.04646</d>
<d>-0.04646</d>
<d>-0.04646</d>
<d>-0.04035</d>
<d>-0.03425</d>
<d>-0.04035</d>
<d>-0.03425</d>
<d>-0.04646</d>
<d>-0.04035</d>
<d>-0.04646</d>
<d>-0.04035</d>
<d>-0.03425</d>
<d>-0.03425</d>
<d>-0.02815</d>
<d>-0.02815</d>
<d>-0.03425</d>
<d>-0.03425</d>
<d>-0.04035</d>
<d>-0.04035</d>
<d>-0.03425</d>
<d>-0.03425</d>
<d>-0.03425</d>
<d>-0.04035</d>
<d>-0.04646</d>
<d>-0.04646</d>
<d>-0.03425</d>
<d>-0.03425</d>
<d>-0.03425</d>
<d>-0.04035</d>
<d>-0.04646</d>
<d>-0.04646</d>
<d>-0.04646</d>
<d>-0.04646</d>
<d>-0.03425</d>
<d>-0.04035</d>
<d>-0.05256</d>
<d>-0.04035</d>
<d>-0.03425</d>
<d>-0.03425</d>
<d>-0.03425</d>
<d>-0.04646</d>
<d>-0.03425</d>
<d>-0.02815</d>
<d>-0.02815</d>
<d>-0.02204</d>
<d>-0.02204</d>
<d>-0.02204</d>
<d>-0.02815</d>
<d>-0.02815</d>
<d>-0.02815</d>
<d>-0.03425</d>
<d>-0.04035</d>
<d>-0.04035</d>
<d>-0.04646</d>
<d>-0.04035</d>
<d>-0.04035</d>
<d>-0.03425</d>
<d>-0.02204</d>
<d>-0.02815</d>
<d>-0.01594</d>
<d>-0.03425</d>
<d>-0.02815</d>
<d>-0.03425</d>
<d>-0.03425</d>
<d>-0.02815</d>
<d>-0.02815</d>
<d>-0.01594</d>
<d>-0.00984</d>
<d>-0.00984</d>
<d>-0.00373</d>
<d>-0.02204</d>
<d>-0.02204</d>
<d>-0.02204</d>
<d>-0.02815</d>
<d>-0.02204</d>
<d>-0.02204</d>
<d>-0.02815</d>
<d>-0.02204</d>
<d>-0.02815</d>
<d>-0.02815</d>
<d>-0.02815</d>
<d>-0.03425</d>
<d>-0.02815</d>
<d>-0.03425</d>
<d>-0.03425</d>
<d>-0.04035</d>
<d>-0.04035</d>
<d>-0.02815</d>
<d>-0.02204</d>
<d>-0.02204</d>
<d>-0.00984</d>
<d>-0.01594</d>
<d>-0.02815</d>
<d>-0.02815</d>
<d>-0.02815</d>
<d>-0.02204</d>
<d>-0.03425</d>
<d>-0.03425</d>
<d>-0.04035</d>
<d>-0.04646</d>
<d>-0.05256</d>
<d>-0.04035</d>
<d>-0.01594</d>
<d>-0.02204</d>
<d>-0.00984</d>
<d>-0.01594</d>
<d>-0.02815</d>
<d>-0.02815</d>
<d>-0.02815</d>
<d>-0.02815</d>
<d>-0.02204</d>
<d>-0.02815</d>
<d>-0.00984</d>
<d>-0.00373</d>
<d>-0.00984</d>
<d>-0.00984</d>
<d>-0.02204</d>
<d>-0.02204</d>
<d>-0.01594</d>
<d>-0.02204</d>
<d>-0.01594</d>
<d>-0.02204</d>
<d>-0.02204</d>
<d>-0.02204</d>
<d>-0.02204</d>
<d>-0.02204</d>
<d>-0.02204</d>
<d>-0.02204</d>
<d>-0.01594</d>
<d>-0.01594</d>
<d>-0.01594</d>
<d>-0.02204</d>
<d>-0.02815</d>
<d>-0.02204</d>
<d>-0.01594</d>
<d>-0.00984</d>
<d>-0.01594</d>
<d>-0.02204</d>
<d>-0.02204</d>
<d>-0.02815</d>
<d>-0.02815</d>
<d>-0.02815</d>
<d>-0.02815</d>
<d>-0.02204</d>
<d>-0.02204</d>
<d>-0.01594</d>
<d>-0.02204</d>
<d>-0.02204</d>
<d>-0.02815</d>
<d>-0.02204</d>
<d>-0.00984</d>
<d>-0.00373</d>
<d>-0.00984</d>
<d>-0.00984</d>
<d>-0.01594</d>
<d>-0.02815</d>
<d>-0.02815</d>
<d>-0.02815</d>
<d>-0.02204</d>
<d>-0.02815</d>
<d>-0.03425</d>
<d>-0.01594</d>
<d>-0.02204</d>
<d>-0.01594</d>
<d>-0.00984</d>
<d>-0.01594</d>
<d>-0.02204</d>
<d>-0.02204</d>
<d>-0.02204</d>
<d>-0.02815</d>
<d>-0.02204</d>
<d>-0.01594</d>
<d>-0.02204</d>
<d>-0.01594</d>
<d>-0.02204</d>
<d>-0.04035</d>
<d>-0.04646</d>
<d>-0.04646</d>
<d>-0.04035</d>
<d>-0.02815</d>
<d>-0.01594</d>
<d>-0.01594</d>
<d>-0.02204</d>
<d>-0.04035</d>
<d>-0.03425</d>
<d>-0.03425</d>
<d>-0.02815</d>
<d>-0.02815</d>
<d>-0.03425</d>
<d>-0.04035</d>
<d>-0.03425</d>
<d>-0.02204</d>
<d>-0.02204</d>
<d>-0.02815</d>
<d>-0.00373</d>
<d>-0.01594</d>
<d>-0.00373</d>
<d>-0.00984</d>
<d>-0.01594</d>
<d>-0.02204</d>
<d>-0.01594</d>
<d>-0.01594</d>
<d>-0.01594</d>
<d>-0.00984</d>
<d>-0.00373</d>
<d>-0.00373</d>
<d>-0.00984</d>
<d>-0.00984</d>
<d>-0.01594</d>
<d>-0.02815</d>
<d>-0.02204</d>
<d>-0.02204</d>
<d>-0.00984</d>
<d>-0.00984</d>
<d>-0.00373</d>
<d>0.002371</d>
<d>-0.00373</d>
<d>-0.02204</d>
<d>-0.02204</d>
<d>-0.01594</d>
<d>-0.01594</d>
<d>-0.02204</d>
<d>-0.01594</d>
<d>-0.01594</d>
<d>-0.01594</d>
<d>-0.01594</d>
<d>-0.00984</d>
<d>-0.00984</d>
<d>-0.02204</d>
<d>-0.01594</d>
<d>-0.00984</d>
<d>-0.00373</d>
<d>-0.00984</d>
<d>-0.00984</d>
<d>-0.02204</d>
<d>-0.02204</d>
<d>-0.02815</d>
<d>-0.02204</d>
<d>-0.01594</d>
<d>-0.02815</d>
<d>-0.02204</d>
<d>-0.02815</d>
<d>-0.02204</d>
<d>-0.02204</d>
<d>-0.02204</d>
<d>-0.01594</d>
<d>-0.01594</d>
<d>-0.00984</d>
<d>-0.00984</d>
<d>-0.01594</d>
<d>-0.02204</d>
<d>-0.02204</d>
<d>-0.01594</d>
<d>-0.02204</d>
<d>-0.01594</d>
<d>-0.00984</d>
<d>-0.01594</d>
<d>-0.02204</d>
<d>-0.02204</d>
<d>-0.02204</d>
<d>-0.00373</d>
<d>0.002371</d>
<d>-0.00373</d>
<d>0.002371</d>
<d>-0.00373</d>
<d>0.002371</d>
<d>0.008474</d>
<d>0.002371</d>
<d>-0.00373</d>
<d>-0.01594</d>
<d>-0.00984</d>
<d>-0.00373</d>
<d>-0.00984</d>
<d>-0.00373</d>
<d>-0.00984</d>
<d>-0.00984</d>
<d>-0.00984</d>
<d>-0.01594</d>
<d>-0.02815</d>
<d>-0.01594</d>
<d>-0.02204</d>
<d>-0.01594</d>
<d>-0.01594</d>
<d>-0.01594</d>
<d>-0.00984</d>
<d>-0.01594</d>
<d>-0.01594</d>
<d>-0.02815</d>
<d>-0.02204</d>
<d>-0.01594</d>
<d>-0.02204</d>
<d>-0.01594</d>
<d>-0.00984</d>
<d>-0.01594</d>
<d>-0.00984</d>
<d>-0.00984</d>
<d>-0.01594</d>
<d>-0.02204</d>
<d>-0.01594</d>
<d>-0.00984</d>
<d>0.002371</d>
<d>0.002371</d>
<d>0.002371</d>
<d>-0.00984</d>
<d>-0.00373</d>
<d>0.002371</d>
<d>0.002371</d>
<d>0.002371</d>
<d>-0.00984</d>
<d>-0.00984</d>
<d>-0.00984</d>
<d>-0.01594</d>
<d>-0.01594</d>
<d>-0.01594</d>
<d>-0.00984</d>
<d>-0.00984</d>
<d>-0.00984</d>
<d>-0.00373</d>
<d>-0.00984</d>
<d>-0.01594</d>
<d>-0.01594</d>
<d>-0.00984</d>
<d>-0.00984</d>
<d>-0.00373</d>
<d>-0.01594</d>
<d>-0.00984</d>
<d>-0.00984</d>
<d>0.002371</d>
<d>0.002371</d>
<d>-0.00373</d>
<d>-0.00373</d>
<d>-0.00984</d>
<d>-0.00984</d>
<d>-0.00984</d>
<d>-0.00373</d>
<d>-0.00373</d>
<d>0.002371</d>
<d>0.008474</d>
<d>-0.00373</d>
<d>0.008474</d>
<d>0.002371</d>
<d>0.002371</d>
<d>0.002371</d>
<d>-0.00373</d>
<d>-0.00373</d>
<d>-0.00373</d>
<d>-0.00373</d>
<d>0.002371</d>
<d>-0.00984</d>
<d>-0.00984</d>
<d>-0.00984</d>
<d>-0.00373</d>
<d>-0.00984</d>
<d>-0.00984</d>
<d>-0.00373</d>
<d>0.002371</d>
<d>-0.00373</d>
<d>0.002371</d>
<d>-0.00373</d>
<d>-0.02204</d>
<d>-0.01594</d>
<d>-0.01594</d>
<d>-0.00984</d>
<d>-0.00373</d>
<d>-0.00984</d>
<d>-0.01594</d>
<d>-0.01594</d>
<d>-0.00984</d>
<d>-0.01594</d>
<d>-0.01594</d>
<d>-0.01594</d>
<d>-0.01594</d>
<d>-0.00373</d>
<d>0.002371</d>
<d>0.002371</d>
<d>0.002371</d>
<d>-0.00373</d>
<d>-0.00984</d>
<d>-0.01594</d>
<d>-0.01594</d>
<d>-0.01594</d>
<d>-0.01594</d>
<d>-0.00984</d>
<d>0.002371</d>
<d>-0.00373</d>
<d>0.002371</d>
<d>0.002371</d>
<d>-0.01594</d>
<d>-0.00373</d>
<d>0.002371</d>
<d>0.002371</d>
<d>0.008474</d>
<d>0.002371</d>
<d>0.002371</d>
<d>-0.00373</d>
<d>0.002371</d>
<d>-0.00373</d>
<d>-0.00373</d>
<d>0.002371</d>
<d>0.008474</d>
<d>0.014578</d>
<d>0.008474</d>
<d>0.008474</d>
<d>0.014578</d>
<d>0.008474</d>
<d>-0.00373</d>
<d>-0.01594</d>
<d>-0.00984</d>
<d>-0.00984</d>
<d>-0.00984</d>
<d>-0.00373</d>
<d>-0.00373</d>
<d>-0.00373</d>
<d>0.002371</d>
<d>0.008474</d>
<d>-0.00984</d>
<d>-0.00373</d>
<d>-0.01594</d>
<d>-0.00984</d>
<d>0.002371</d>
<d>-0.00984</d>
<d>0.002371</d>
<d>-0.00373</d>
<d>-0.00984</d>
<d>-0.00373</d>
<d>-0.00984</d>
<d>-0.00373</d>
<d>-0.00984</d>
<d>-0.00984</d>
<d>-0.00373</d>
<d>-0.00373</d>
<d>0.008474</d>
<d>-0.00373</d>
<d>-0.00984</d>
<d>-0.01594</d>
<d>-0.01594</d>
<d>-0.01594</d>
<d>-0.00984</d>
<d>0.002371</d>
<d>0.002371</d>
<d>0.002371</d>
<d>0.008474</d>
<d>0.014578</d>
<d>0.008474</d>
<d>0.008474</d>
<d>0.002371</d>
<d>0.002371</d>
<d>-0.00373</d>
<d>-0.00984</d>
<d>-0.02204</d>
<d>-0.02204</d>
<d>-0.02204</d>
<d>-0.00984</d>
<d>-0.00373</d>
<d>-0.00373</d>
<d>-0.00984</d>
<d>-0.01594</d>
<d>-0.00984</d>
<d>-0.00373</d>
<d>0.008474</d>
<d>0.002371</d>
<d>0.002371</d>
<d>0.002371</d>
<d>-0.00984</d>
<d>0.008474</d>
<d>0.008474</d>
<d>0.014578</d>
<d>0.014578</d>
<d>0.008474</d>
<d>0.008474</d>
<d>0.002371</d>
<d>-0.00984</d>
<d>0.002371</d>
<d>-0.00373</d>
<d>0.008474</d>
<d>0.002371</d>
<d>0.002371</d>
<d>-0.00373</d>
<d>-0.00984</d>
<d>-0.02204</d>
<d>-0.00984</d>
<d>0.008474</d>
<d>0.026785</d>
<d>0.014578</d>
<d>0.008474</d>
<d>0.008474</d>
<d>-0.00373</d>
<d>0.002371</d>
<d>0.002371</d>
<d>-0.00984</d>
<d>0.002371</d>
<d>-0.00984</d>
<d>0.002371</d>
<d>-0.00984</d>
<d>-0.01594</d>
<d>-0.00984</d>
<d>-0.01594</d>
<d>0.002371</d>
<d>-0.00373</d>
<d>-0.00373</d>
<d>-0.01594</d>
<d>-0.01594</d>
<d>-0.01594</d>
<d>-0.00984</d>
<d>-0.00984</d>
<d>-0.00373</d>
<d>-0.00984</d>
<d>-0.00984</d>
<d>-0.00373</d>
<d>-0.00984</d>
<d>0.008474</d>
<d>0.008474</d>
<d>0.008474</d>
<d>-0.00373</d>
<d>-0.00984</d>
<d>-0.00984</d>
<d>-0.00373</d>
<d>-0.00984</d>
<d>-0.00373</d>
<d>-0.00984</d>
<d>-0.00373</d>
<d>-0.00984</d>
<d>-0.01594</d>
<d>-0.00984</d>
<d>0.002371</d>
<d>0.014578</d>
<d>0.020681</d>
<d>0.020681</d>
<d>0.008474</d>
<d>0.002371</d>
<d>-0.00984</d>
<d>-0.00373</d>
<d>-0.00373</d>
<d>0.008474</d>
<d>0.008474</d>
<d>0.002371</d>
<d>0.008474</d>
<d>0.002371</d>
<d>0.002371</d>
<d>-0.00373</d>
<d>-0.00984</d>
<d>-0.01594</d>
<d>-0.01594</d>
<d>-0.00984</d>
<d>-0.00984</d>
<d>-0.01594</d>
<d>-0.00373</d>
<d>-0.00373</d>
<d>-0.00373</d>
<d>-0.00984</d>
<d>-0.00373</d>
<d>-0.00984</d>
<d>-0.00984</d>
<d>-0.01594</d>
<d>-0.01594</d>
<d>-0.01594</d>
<d>-0.00984</d>
<d>-0.00984</d>
<d>-0.01594</d>
<d>-0.00984</d>
<d>-0.00984</d>
<d>-0.00373</d>
<d>-0.00984</d>
<d>-0.01594</d>
<d>-0.01594</d>
<d>-0.00984</d>
<d>-0.00373</d>
<d>-0.00373</d>
<d>0.002371</d>
<d>0.002371</d>
<d>-0.00373</d>
<d>0.008474</d>
<d>0.002371</d>
<d>0.002371</d>
<d>0.002371</d>
<d>0.008474</d>
<d>0.008474</d>
<d>0.008474</d>
<d>0.008474</d>
<d>0.008474</d>
<d>-0.00373</d>
<d>-0.00373</d>
<d>0.008474</d>
<d>0.014578</d>
<d>0.014578</d>
<d>0.008474</d>
<d>-0.00373</d>
<d>-0.00984</d>
<d>-0.00984</d>
<d>-0.00373</d>
<d>0.002371</d>
<d>-0.00373</d>
<d>0.002371</d>
<d>-0.00373</d>
<d>0.008474</d>
<d>0.002371</d>
<d>0.008474</d>
<d>0.008474</d>
<d>0.008474</d>
<d>0.008474</d>
<d>-0.00373</d>
<d>0.002371</d>
<d>0.002371</d>
<d>0.002371</d>
<d>0.002371</d>
<d>-0.00373</d>
<d>-0.00984</d>
<d>-0.00373</d>
<d>-0.00373</d>
<d>-0.00984</d>
<d>-0.00373</d>
<d>-0.00984</d>
<d>-0.00373</d>
<d>0.002371</d>
<d>-0.00373</d>
<d>0.008474</d>
<d>0.008474</d>
<d>0.008474</d>
<d>0.002371</d>
<d>-0.00984</d>
<d>0.008474</d>
<d>0.002371</d>
<d>0.008474</d>
<d>-0.00373</d>
<d>0.002371</d>
<d>-0.00984</d>
<d>0.002371</d>
<d>-0.02204</d>
<d>-0.01594</d>
<d>-0.01594</d>
<d>-0.00984</d>
<d>0.002371</d>
<d>0.002371</d>
<d>0.008474</d>
<d>0.002371</d>
<d>0.008474</d>
<d>0.008474</d>
<d>0.002371</d>
<d>0.002371</d>
<d>-0.00373</d>
<d>0.002371</d>
<d>0.008474</d>
<d>0.002371</d>
<d>0.008474</d>
<d>0.014578</d>
<d>0.008474</d>
<d>0.002371</d>
<d>-0.00373</d>
<d>-0.00373</d>
<d>-0.00373</d>
<d>0.002371</d>
<d>0.002371</d>
<d>0.002371</d>
<d>0.002371</d>
<d>0.008474</d>
<d>-0.00373</d>
<d>0.002371</d>
<d>-0.00373</d>
<d>-0.00984</d>
<d>-0.00984</d>
<d>-0.00984</d>
<d>-0.00373</d>
<d>-0.00984</d>
<d>-0.00373</d>
<d>-0.00373</d>
<d>0.002371</d>
<d>0.002371</d>
<d>-0.00373</d>
<d>0.002371</d>
<d>0.002371</d>
<d>0.002371</d>
<d>0.020681</d>
<d>0.020681</d>
<d>0.020681</d>
<d>0.014578</d>
<d>0.002371</d>
<d>-0.00373</d>
<d>-0.00373</d>
<d>-0.00984</d>
<d>-0.00373</d>
<d>0.002371</d>
<d>0.002371</d>
<d>0.014578</d>
<d>-0.00373</d>
<d>-0.00373</d>
<d>-0.00373</d>
<d>-0.00373</d>
<d>-0.00373</d>
<d>-0.00984</d>
<d>-0.00373</d>
<d>-0.00984</d>
<d>-0.00984</d>
<d>-0.00984</d>
<d>-0.01594</d>
<d>-0.00984</d>
<d>-0.00373</d>
<d>0.002371</d>
<d>0.008474</d>
<d>0.014578</d>
<d>0.014578</d>
<d>0.020681</d>
</Subcolumn>
</YColumn>
<YColumn Width="103" Decimals="6" Subcolumns="1">
<Title>9</Title>
<Subcolumn>
<d>0.001467</d>
<d>-0.004637</d>
<d>-0.01074</d>
<d>-0.01074</d>
<d>0.001467</d>
<d>0.031984</d>
<d>0.019777</d>
<d>0.00757</d>
<d>0.013674</d>
<d>0.019777</d>
<d>0.019777</d>
<d>0.019777</d>
<d>0.00757</d>
<d>-0.004637</d>
<d>0.00757</d>
<d>0.019777</d>
<d>0.019777</d>
<d>0.00757</d>
<d>-0.004637</d>
<d>0.001467</d>
<d>0.025881</d>
<d>0.00757</d>
<d>0.013674</d>
<d>0.013674</d>
<d>0.013674</d>
<d>0.001467</d>
<d>-0.004637</d>
<d>-0.01074</d>
<d>-0.01074</d>
<d>0.001467</d>
<d>-0.016844</d>
<d>-0.016844</d>
<d>-0.004637</d>
<d>-0.01074</d>
<d>-0.01074</d>
<d>0.001467</d>
<d>0.00757</d>
<d>-0.01074</d>
<d>0.001467</d>
<d>0.001467</d>
<d>0.00757</d>
<d>-0.01074</d>
<d>-0.022947</d>
<d>-0.022947</d>
<d>-0.016844</d>
<d>-0.016844</d>
<d>-0.022947</d>
<d>-0.01074</d>
<d>-0.01074</d>
<d>-0.022947</d>
<d>-0.016844</d>
<d>-0.004637</d>
<d>0.001467</d>
<d>0.00757</d>
<d>0.013674</d>
<d>0.025881</d>
<d>0.025881</d>
<d>0.025881</d>
<d>0.013674</d>
<d>0.001467</d>
<d>0.001467</d>
<d>0.001467</d>
<d>0.013674</d>
<d>0.013674</d>
<d>-0.004637</d>
<d>-0.004637</d>
<d>0.00757</d>
<d>0.00757</d>
<d>-0.004637</d>
<d>0.001467</d>
<d>-0.004637</d>
<d>-0.004637</d>
<d>-0.01074</d>
<d>-0.01074</d>
<d>-0.01074</d>
<d>-0.01074</d>
<d>-0.01074</d>
<d>-0.01074</d>
<d>0.001467</d>
<d>-0.01074</d>
<d>-0.016844</d>
<d>-0.016844</d>
<d>-0.016844</d>
<d>-0.004637</d>
<d>-0.004637</d>
<d>-0.01074</d>
<d>0.00757</d>
<d>0.001467</d>
<d>-0.004637</d>
<d>0.001467</d>
<d>0.001467</d>
<d>0.001467</d>
<d>-0.01074</d>
<d>-0.004637</d>
<d>0.00757</d>
<d>0.00757</d>
<d>-0.004637</d>
<d>-0.01074</d>
<d>-0.004637</d>
<d>0.001467</d>
<d>0.001467</d>
<d>0.00757</d>
<d>0.019777</d>
<d>0.001467</d>
<d>0.001467</d>
<d>0.001467</d>
<d>-0.01074</d>
<d>-0.01074</d>
<d>-0.004637</d>
<d>-0.01074</d>
<d>-0.029051</d>
<d>-0.01074</d>
<d>-0.01074</d>
<d>0.00757</d>
<d>-0.004637</d>
<d>-0.01074</d>
<d>-0.004637</d>
<d>-0.01074</d>
<d>-0.016844</d>
<d>-0.004637</d>
<d>-0.01074</d>
<d>-0.004637</d>
<d>0.001467</d>
<d>0.00757</d>
<d>0.013674</d>
<d>0.019777</d>
<d>0.025881</d>
<d>0.038088</d>
<d>0.019777</d>
<d>0.013674</d>
<d>0.00757</d>
<d>0.001467</d>
<d>-0.004637</d>
<d>0.00757</d>
<d>0.013674</d>
<d>0.00757</d>
<d>0.00757</d>
<d>0.00757</d>
<d>0.001467</d>
<d>0.00757</d>
<d>-0.016844</d>
<d>-0.016844</d>
<d>-0.004637</d>
<d>-0.004637</d>
<d>-0.004637</d>
<d>-0.01074</d>
<d>-0.004637</d>
<d>0.001467</d>
<d>-0.004637</d>
<d>-0.004637</d>
<d>-0.016844</d>
<d>-0.022947</d>
<d>-0.004637</d>
<d>-0.004637</d>
<d>0.019777</d>
<d>0.013674</d>
<d>0.019777</d>
<d>0.013674</d>
<d>0.013674</d>
<d>0.00757</d>
<d>-0.01074</d>
<d>-0.016844</d>
<d>-0.022947</d>
<d>-0.029051</d>
<d>-0.01074</d>
<d>-0.004637</d>
<d>-0.004637</d>
<d>0.001467</d>
<d>-0.022947</d>
<d>-0.01074</d>
<d>0.001467</d>
<d>0.001467</d>
<d>0.001467</d>
<d>0.00757</d>
<d>0.019777</d>
<d>0.025881</d>
<d>0.00757</d>
<d>0.013674</d>
<d>0.001467</d>
<d>0.001467</d>
<d>0.013674</d>
<d>0.00757</d>
<d>0.001467</d>
<d>0.001467</d>
<d>-0.004637</d>
<d>-0.004637</d>
<d>0.013674</d>
<d>0.013674</d>
<d>0.013674</d>
<d>0.00757</d>
<d>0.001467</d>
<d>0.001467</d>
<d>-0.004637</d>
<d>-0.004637</d>
<d>-0.016844</d>
<d>-0.01074</d>
<d>-0.01074</d>
<d>-0.004637</d>
<d>-0.01074</d>
<d>-0.004637</d>
<d>0.001467</d>
<d>0.001467</d>
<d>0.00757</d>
<d>-0.004637</d>
<d>-0.004637</d>
<d>0.013674</d>
<d>0.00757</d>
<d>0.019777</d>
<d>-0.004637</d>
<d>-0.01074</d>
<d>-0.01074</d>
<d>-0.01074</d>
<d>-0.004637</d>
<d>0.00757</d>
<d>0.001467</d>
<d>0.001467</d>
<d>0.001467</d>
<d>0.00757</d>
<d>0.001467</d>
<d>-0.004637</d>
<d>0.001467</d>
<d>0.013674</d>
<d>0.019777</d>
<d>0.025881</d>
<d>0.025881</d>
<d>0.025881</d>
<d>0.025881</d>
<d>0.013674</d>
<d>0.00757</d>
<d>0.00757</d>
<d>-0.004637</d>
<d>-0.016844</d>
<d>-0.022947</d>
<d>-0.01074</d>
<d>0.00757</d>
<d>-0.01074</d>
<d>-0.004637</d>
<d>-0.01074</d>
<d>0.001467</d>
<d>0.00757</d>
<d>0.001467</d>
<d>-0.004637</d>
<d>0.001467</d>
<d>0.00757</d>
<d>0.00757</d>
<d>-0.004637</d>
<d>-0.01074</d>
<d>-0.022947</d>
<d>-0.01074</d>
<d>0.00757</d>
<d>0.019777</d>
<d>0.013674</d>
<d>0.001467</d>
<d>-0.004637</d>
<d>0.00757</d>
<d>0.00757</d>
<d>0.00757</d>
<d>0.013674</d>
<d>0.00757</d>
<d>0.013674</d>
<d>0.001467</d>
<d>0.001467</d>
<d>0.00757</d>
<d>0.00757</d>
<d>-0.004637</d>
<d>-0.01074</d>
<d>0.001467</d>
<d>-0.004637</d>
<d>-0.016844</d>
<d>0.00757</d>
<d>-0.004637</d>
<d>0.00757</d>
<d>0.001467</d>
<d>-0.004637</d>
<d>0.001467</d>
<d>0.001467</d>
<d>0.00757</d>
<d>0.001467</d>
<d>-0.016844</d>
<d>-0.016844</d>
<d>-0.004637</d>
<d>-0.01074</d>
<d>-0.01074</d>
<d>-0.01074</d>
<d>-0.016844</d>
<d>-0.022947</d>
<d>-0.029051</d>
<d>-0.029051</d>
<d>-0.01074</d>
<d>-0.01074</d>
<d>0.001467</d>
<d>-0.004637</d>
<d>-0.022947</d>
<d>-0.022947</d>
<d>0.001467</d>
<d>0.001467</d>
<d>0.00757</d>
<d>0.013674</d>
<d>0.00757</d>
<d>0.00757</d>
<d>0.019777</d>
<d>0.00757</d>
<d>-0.004637</d>
<d>-0.01074</d>
<d>-0.01074</d>
<d>-0.004637</d>
<d>0.00757</d>
<d>-0.004637</d>
<d>0.001467</d>
<d>0.00757</d>
<d>0.001467</d>
<d>0.001467</d>
<d>0.001467</d>
<d>-0.004637</d>
<d>0.001467</d>
<d>-0.004637</d>
<d>-0.01074</d>
<d>-0.01074</d>
<d>-0.016844</d>
<d>-0.004637</d>
<d>0.00757</d>
<d>0.001467</d>
<d>0.00757</d>
<d>0.013674</d>
<d>0.013674</d>
<d>-0.004637</d>
<d>-0.016844</d>
<d>-0.004637</d>
<d>0.001467</d>
<d>0.001467</d>
<d>0.001467</d>
<d>0.013674</d>
<d>0.013674</d>
<d>0.00757</d>
<d>0.00757</d>
<d>-0.004637</d>
<d>0.00757</d>
<d>0.001467</d>
<d>-0.004637</d>
<d>0.00757</d>
<d>0.00757</d>
<d>-0.004637</d>
<d>-0.01074</d>
<d>0.001467</d>
<d>-0.004637</d>
<d>-0.004637</d>
<d>0.001467</d>
<d>0.00757</d>
<d>0.001467</d>
<d>0.001467</d>
<d>0.001467</d>
<d>0.001467</d>
<d>0.00757</d>
<d>0.013674</d>
<d>0.013674</d>
<d>0.001467</d>
<d>0.001467</d>
<d>0.001467</d>
<d>-0.01074</d>
<d>-0.004637</d>
<d>0.00757</d>
<d>0.00757</d>
<d>0.013674</d>
<d>0.013674</d>
<d>0.00757</d>
<d>0.00757</d>
<d>-0.004637</d>
<d>0.00757</d>
<d>0.00757</d>
<d>-0.016844</d>
<d>-0.004637</d>
<d>-0.004637</d>
<d>-0.01074</d>
<d>-0.004637</d>
<d>0.001467</d>
<d>0.013674</d>
<d>-0.004637</d>
<d>-0.016844</d>
<d>-0.022947</d>
<d>-0.016844</d>
<d>-0.01074</d>
<d>0.001467</d>
<d>0.00757</d>
<d>0.013674</d>
<d>0.001467</d>
<d>-0.004637</d>
<d>0.001467</d>
<d>-0.004637</d>
<d>-0.004637</d>
<d>-0.004637</d>
<d>0.001467</d>
<d>0.013674</d>
<d>0.001467</d>
<d>0.001467</d>
<d>0.001467</d>
<d>-0.004637</d>
<d>-0.004637</d>
<d>0.013674</d>
<d>0.013674</d>
<d>0.001467</d>
<d>-0.01074</d>
<d>-0.456297</d>
<d>-1.023924</d>
<d>-0.431883</d>
<d>0.31885</d>
<d>0.184572</d>
<d>0.038088</d>
<d>0.062502</d>
<d>0.056398</d>
<d>0.044191</d>
<d>0.044191</d>
<d>0.038088</d>
<d>0.025881</d>
<d>0.025881</d>
<d>0.013674</d>
<d>0.00757</d>
<d>0.025881</d>
<d>0.031984</d>
<d>0.013674</d>
<d>0.013674</d>
<d>0.013674</d>
<d>0.001467</d>
<d>0.001467</d>
<d>0.001467</d>
<d>0.00757</d>
<d>0.00757</d>
<d>0.001467</d>
<d>0.001467</d>
<d>0.013674</d>
<d>0.025881</d>
<d>0.019777</d>
<d>0.019777</d>
<d>0.025881</d>
<d>0.013674</d>
<d>0.019777</d>
<d>0.019777</d>
<d>0.00757</d>
<d>0.019777</d>
<d>0.019777</d>
<d>0.00757</d>
<d>0.001467</d>
<d>-0.004637</d>
<d>-0.016844</d>
<d>-0.01074</d>
<d>-0.004637</d>
<d>0.001467</d>
<d>0.019777</d>
<d>0.019777</d>
<d>0.00757</d>
<d>-0.01074</d>
<d>-0.004637</d>
<d>-0.004637</d>
<d>0.013674</d>
<d>0.031984</d>
<d>0.038088</d>
<d>-0.022947</d>
<d>-0.083982</d>
<d>-0.108397</d>
<d>-0.090086</d>
<d>-0.065672</d>
<d>-0.065672</d>
<d>-0.059568</d>
<d>-0.047361</d>
<d>-0.041258</d>
<d>-0.029051</d>
<d>-0.022947</d>
<d>-0.016844</d>
<d>-0.016844</d>
<d>-0.016844</d>
<d>-0.01074</d>
<d>-0.01074</d>
<d>-0.029051</d>
<d>-0.035154</d>
<d>-0.022947</d>
<d>-0.029051</d>
<d>-0.022947</d>
<d>-0.029051</d>
<d>-0.035154</d>
<d>-0.029051</d>
<d>-0.047361</d>
<d>-0.041258</d>
<d>-0.047361</d>
<d>-0.047361</d>
<d>-0.041258</d>
<d>-0.035154</d>
<d>-0.029051</d>
<d>-0.047361</d>
<d>-0.059568</d>
<d>-0.053465</d>
<d>-0.047361</d>
<d>-0.041258</d>
<d>-0.041258</d>
<d>-0.065672</d>
<d>-0.059568</d>
<d>-0.059568</d>
<d>-0.071775</d>
<d>-0.065672</d>
<d>-0.059568</d>
<d>-0.065672</d>
<d>-0.065672</d>
<d>-0.083982</d>
<d>-0.077879</d>
<d>-0.071775</d>
<d>-0.083982</d>
<d>-0.096189</d>
<d>-0.083982</d>
<d>-0.071775</d>
<d>-0.090086</d>
<d>-0.096189</d>
<d>-0.090086</d>
<d>-0.077879</d>
<d>-0.083982</d>
<d>-0.096189</d>
<d>-0.090086</d>
<d>-0.083982</d>
<d>-0.090086</d>
<d>-0.090086</d>
<d>-0.090086</d>
<d>-0.077879</d>
<d>-0.077879</d>
<d>-0.077879</d>
<d>-0.083982</d>
<d>-0.090086</d>
<d>-0.083982</d>
<d>-0.083982</d>
<d>-0.077879</d>
<d>-0.065672</d>
<d>-0.065672</d>
<d>-0.065672</d>
<d>-0.077879</d>
<d>-0.096189</d>
<d>-0.1145</d>
<d>-0.108397</d>
<d>-0.096189</d>
<d>-0.090086</d>
<d>-0.077879</d>
<d>-0.065672</d>
<d>-0.083982</d>
<d>-0.071775</d>
<d>-0.077879</d>
<d>-0.077879</d>
<d>-0.065672</d>
<d>-0.065672</d>
<d>-0.071775</d>
<d>-0.065672</d>
<d>-0.083982</d>
<d>-0.077879</d>
<d>-0.071775</d>
<d>-0.077879</d>
<d>-0.077879</d>
<d>-0.065672</d>
<d>-0.083982</d>
<d>-0.090086</d>
<d>-0.077879</d>
<d>-0.077879</d>
<d>-0.083982</d>
<d>-0.090086</d>
<d>-0.096189</d>
<d>-0.071775</d>
<d>-0.059568</d>
<d>-0.077879</d>
<d>-0.065672</d>
<d>-0.065672</d>
<d>-0.065672</d>
<d>-0.065672</d>
<d>-0.059568</d>
<d>-0.065672</d>
<d>-0.071775</d>
<d>-0.077879</d>
<d>-0.071775</d>
<d>-0.065672</d>
<d>-0.059568</d>
<d>-0.071775</d>
<d>-0.059568</d>
<d>-0.065672</d>
<d>-0.077879</d>
<d>-0.077879</d>
<d>-0.083982</d>
<d>-0.090086</d>
<d>-0.077879</d>
<d>-0.083982</d>
<d>-0.065672</d>
<d>-0.065672</d>
<d>-0.071775</d>
<d>-0.071775</d>
<d>-0.053465</d>
<d>-0.053465</d>
<d>-0.059568</d>
<d>-0.065672</d>
<d>-0.077879</d>
<d>-0.065672</d>
<d>-0.059568</d>
<d>-0.065672</d>
<d>-0.065672</d>
<d>-0.077879</d>
<d>-0.065672</d>
<d>-0.059568</d>
<d>-0.047361</d>
<d>-0.053465</d>
<d>-0.059568</d>
<d>-0.059568</d>
<d>-0.059568</d>
<d>-0.065672</d>
<d>-0.059568</d>
<d>-0.047361</d>
<d>-0.053465</d>
<d>-0.047361</d>
<d>-0.053465</d>
<d>-0.059568</d>
<d>-0.047361</d>
<d>-0.035154</d>
<d>-0.035154</d>
<d>-0.029051</d>
<d>-0.035154</d>
<d>-0.041258</d>
<d>-0.053465</d>
<d>-0.053465</d>
<d>-0.035154</d>
<d>-0.041258</d>
<d>-0.047361</d>
<d>-0.047361</d>
<d>-0.059568</d>
<d>-0.047361</d>
<d>-0.053465</d>
<d>-0.053465</d>
<d>-0.059568</d>
<d>-0.059568</d>
<d>-0.041258</d>
<d>-0.041258</d>
<d>-0.041258</d>
<d>-0.047361</d>
<d>-0.041258</d>
<d>-0.047361</d>
<d>-0.047361</d>
<d>-0.059568</d>
<d>-0.053465</d>
<d>-0.041258</d>
<d>-0.035154</d>
<d>-0.047361</d>
<d>-0.047361</d>
<d>-0.041258</d>
<d>-0.041258</d>
<d>-0.041258</d>
<d>-0.041258</d>
<d>-0.053465</d>
<d>-0.059568</d>
<d>-0.047361</d>
<d>-0.041258</d>
<d>-0.035154</d>
<d>-0.035154</d>
<d>-0.029051</d>
<d>-0.035154</d>
<d>-0.035154</d>
<d>-0.029051</d>
<d>-0.022947</d>
<d>-0.016844</d>
<d>-0.01074</d>
<d>-0.022947</d>
<d>-0.029051</d>
<d>-0.022947</d>
<d>-0.022947</d>
<d>-0.01074</d>
<d>-0.01074</d>
<d>-0.035154</d>
<d>-0.004637</d>
<d>-0.004637</d>
<d>-0.004637</d>
<d>-0.01074</d>
<d>-0.022947</d>
<d>-0.029051</d>
<d>-0.022947</d>
<d>-0.022947</d>
<d>-0.01074</d>
<d>-0.01074</d>
<d>-0.035154</d>
<d>-0.035154</d>
<d>-0.029051</d>
<d>-0.022947</d>
<d>-0.029051</d>
<d>-0.029051</d>
<d>-0.035154</d>
<d>-0.041258</d>
<d>-0.035154</d>
<d>-0.029051</d>
<d>-0.029051</d>
<d>-0.047361</d>
<d>-0.035154</d>
<d>-0.029051</d>
<d>-0.029051</d>
<d>-0.022947</d>
<d>-0.022947</d>
<d>-0.022947</d>
<d>-0.029051</d>
<d>-0.029051</d>
<d>-0.035154</d>
<d>-0.035154</d>
<d>-0.022947</d>
<d>-0.01074</d>
<d>-0.004637</d>
<d>-0.016844</d>
<d>-0.029051</d>
<d>-0.022947</d>
<d>-0.022947</d>
<d>-0.035154</d>
<d>-0.022947</d>
<d>-0.035154</d>
<d>-0.016844</d>
<d>-0.004637</d>
<d>-0.01074</d>
<d>-0.01074</d>
<d>-0.022947</d>
<d>-0.022947</d>
<d>-0.029051</d>
<d>-0.035154</d>
<d>-0.029051</d>
<d>-0.016844</d>
<d>-0.01074</d>
<d>-0.004637</d>
<d>-0.01074</d>
<d>-0.01074</d>
<d>-0.016844</d>
<d>-0.016844</d>
<d>-0.016844</d>
<d>-0.029051</d>
<d>-0.029051</d>
<d>-0.041258</d>
<d>-0.022947</d>
<d>-0.022947</d>
<d>-0.022947</d>
<d>-0.035154</d>
<d>-0.047361</d>
<d>-0.035154</d>
<d>-0.047361</d>
<d>-0.041258</d>
<d>-0.029051</d>
<d>-0.035154</d>
<d>-0.029051</d>
<d>-0.022947</d>
<d>-0.029051</d>
<d>-0.029051</d>
<d>-0.035154</d>
<d>-0.029051</d>
<d>-0.029051</d>
<d>-0.029051</d>
<d>-0.022947</d>
<d>-0.022947</d>
<d>-0.029051</d>
<d>-0.022947</d>
<d>-0.022947</d>
<d>-0.01074</d>
<d>-0.022947</d>
<d>-0.022947</d>
<d>-0.029051</d>
<d>-0.047361</d>
<d>-0.041258</d>
<d>-0.022947</d>
<d>-0.016844</d>
<d>-0.029051</d>
<d>-0.004637</d>
<d>-0.004637</d>
<d>-0.004637</d>
<d>-0.01074</d>
<d>-0.035154</d>
<d>-0.035154</d>
<d>-0.035154</d>
<d>-0.035154</d>
<d>-0.035154</d>
<d>-0.035154</d>
<d>-0.022947</d>
<d>-0.016844</d>
<d>-0.016844</d>
<d>-0.016844</d>
<d>-0.022947</d>
<d>-0.029051</d>
<d>-0.035154</d>
<d>-0.016844</d>
<d>-0.016844</d>
<d>-0.01074</d>
<d>-0.01074</d>
<d>-0.01074</d>
<d>0.001467</d>
<d>0.00757</d>
<d>-0.004637</d>
<d>0.001467</d>
<d>-0.004637</d>
<d>-0.01074</d>
<d>-0.016844</d>
<d>-0.016844</d>
<d>-0.01074</d>
<d>-0.01074</d>
<d>-0.01074</d>
<d>-0.016844</d>
<d>-0.016844</d>
<d>-0.022947</d>
<d>-0.016844</d>
<d>-0.029051</d>
<d>-0.029051</d>
<d>-0.035154</d>
<d>-0.029051</d>
<d>-0.004637</d>
<d>0.00757</d>
<d>0.025881</d>
<d>-0.01074</d>
<d>-0.035154</d>
<d>-0.035154</d>
<d>-0.029051</d>
<d>-0.029051</d>
<d>-0.016844</d>
<d>-0.016844</d>
<d>-0.016844</d>
<d>-0.01074</d>
<d>-0.01074</d>
<d>0.00757</d>
<d>0.001467</d>
<d>-0.01074</d>
<d>0.001467</d>
<d>-0.004637</d>
<d>0.001467</d>
<d>0.013674</d>
<d>0.019777</d>
<d>0.013674</d>
<d>0.001467</d>
<d>0.001467</d>
<d>-0.01074</d>
<d>-0.022947</d>
<d>-0.01074</d>
<d>-0.029051</d>
<d>-0.022947</d>
<d>-0.01074</d>
<d>-0.01074</d>
<d>-0.004637</d>
<d>-0.004637</d>
<d>-0.01074</d>
<d>-0.01074</d>
<d>-0.016844</d>
<d>-0.01074</d>
<d>-0.004637</d>
<d>-0.016844</d>
<d>-0.016844</d>
<d>0.001467</d>
<d>0.001467</d>
<d>-0.004637</d>
<d>0.001467</d>
<d>0.001467</d>
<d>0.001467</d>
<d>0.001467</d>
<d>0.00757</d>
<d>0.001467</d>
<d>0.013674</d>
<d>0.013674</d>
<d>0.025881</d>
<d>0.013674</d>
<d>0.001467</d>
<d>0.013674</d>
<d>0.00757</d>
<d>-0.004637</d>
<d>-0.01074</d>
<d>-0.022947</d>
<d>-0.029051</d>
<d>-0.022947</d>
<d>-0.01074</d>
<d>-0.004637</d>
<d>0.001467</d>
<d>-0.004637</d>
<d>-0.004637</d>
<d>-0.01074</d>
<d>-0.022947</d>
<d>-0.022947</d>
<d>-0.029051</d>
<d>-0.022947</d>
<d>-0.022947</d>
<d>-0.01074</d>
<d>-0.01074</d>
<d>-0.01074</d>
<d>-0.004637</d>
<d>-0.004637</d>
<d>-0.01074</d>
<d>-0.016844</d>
<d>-0.004637</d>
<d>-0.01074</d>
<d>-0.004637</d>
<d>0.001467</d>
<d>-0.004637</d>
<d>-0.004637</d>
<d>-0.004637</d>
<d>-0.004637</d>
<d>-0.016844</d>
<d>-0.016844</d>
<d>-0.016844</d>
<d>-0.01074</d>
<d>-0.004637</d>
<d>-0.01074</d>
<d>-0.016844</d>
<d>-0.01074</d>
<d>0.001467</d>
<d>-0.01074</d>
<d>-0.01074</d>
<d>0.001467</d>
<d>-0.01074</d>
<d>-0.016844</d>
<d>-0.01074</d>
<d>-0.01074</d>
<d>-0.029051</d>
<d>-0.016844</d>
<d>-0.016844</d>
<d>-0.01074</d>
<d>0.00757</d>
<d>-0.004637</d>
<d>0.013674</d>
<d>0.001467</d>
<d>0.001467</d>
<d>-0.004637</d>
<d>-0.016844</d>
<d>-0.004637</d>
<d>0.001467</d>
<d>0.001467</d>
<d>0.001467</d>
<d>0.001467</d>
<d>0.001467</d>
<d>0.001467</d>
<d>-0.004637</d>
<d>0.001467</d>
<d>-0.004637</d>
<d>0.001467</d>
<d>-0.004637</d>
<d>-0.004637</d>
<d>-0.01074</d>
<d>-0.004637</d>
<d>-0.01074</d>
<d>-0.01074</d>
<d>-0.004637</d>
<d>0.013674</d>
<d>0.00757</d>
<d>0.00757</d>
<d>0.013674</d>
<d>0.00757</d>
<d>0.013674</d>
<d>0.013674</d>
<d>0.013674</d>
<d>0.025881</d>
<d>0.019777</d>
<d>0.025881</d>
<d>0.00757</d>
<d>-0.01074</d>
<d>0.00757</d>
<d>0.019777</d>
<d>0.025881</d>
<d>0.00757</d>
<d>-0.01074</d>
<d>-0.01074</d>
<d>-0.004637</d>
<d>-0.01074</d>
<d>-0.004637</d>
<d>-0.01074</d>
<d>-0.01074</d>
<d>-0.01074</d>
<d>-0.029051</d>
<d>-0.029051</d>
<d>-0.01074</d>
<d>-0.01074</d>
<d>-0.01074</d>
<d>-0.022947</d>
<d>-0.016844</d>
<d>-0.016844</d>
<d>0.001467</d>
<d>-0.004637</d>
<d>-0.004637</d>
<d>-0.004637</d>
<d>-0.016844</d>
<d>-0.022947</d>
<d>-0.01074</d>
<d>-0.016844</d>
<d>-0.016844</d>
<d>-0.004637</d>
<d>-0.01074</d>
<d>-0.01074</d>
<d>-0.01074</d>
<d>-0.01074</d>
<d>0.001467</d>
<d>0.001467</d>
<d>0.00757</d>
<d>0.00757</d>
<d>0.013674</d>
<d>0.019777</d>
<d>0.019777</d>
<d>0.013674</d>
<d>-0.004637</d>
<d>0.019777</d>
<d>0.001467</d>
<d>-0.004637</d>
<d>0.001467</d>
<d>-0.004637</d>
<d>-0.004637</d>
<d>0.00757</d>
<d>0.001467</d>
<d>-0.004637</d>
<d>-0.004637</d>
<d>-0.004637</d>
<d>0.001467</d>
<d>0.001467</d>
<d>0.019777</d>
<d>0.031984</d>
<d>0.031984</d>
<d>0.031984</d>
<d>0.019777</d>
<d>0.001467</d>
<d>0.013674</d>
<d>0.00757</d>
<d>-0.004637</d>
<d>-0.01074</d>
<d>-0.004637</d>
<d>0.001467</d>
<d>0.00757</d>
<d>0.025881</d>
<d>0.031984</d>
<d>0.025881</d>
<d>0.013674</d>
<d>0.00757</d>
<d>0.00757</d>
<d>0.013674</d>
<d>0.019777</d>
<d>0.013674</d>
<d>0.019777</d>
<d>0.001467</d>
<d>-0.01074</d>
<d>-0.01074</d>
<d>-0.01074</d>
<d>-0.004637</d>
<d>0.00757</d>
<d>0.001467</d>
<d>0.00757</d>
<d>0.00757</d>
<d>0.001467</d>
<d>-0.01074</d>
<d>-0.01074</d>
<d>-0.022947</d>
<d>-0.01074</d>
<d>-0.004637</d>
<d>0.001467</d>
<d>0.001467</d>
<d>0.013674</d>
<d>0.00757</d>
<d>-0.004637</d>
<d>-0.01074</d>
<d>-0.004637</d>
<d>0.00757</d>
<d>-0.004637</d>
<d>0.00757</d>
<d>0.00757</d>
<d>0.001467</d>
<d>0.001467</d>
<d>-0.004637</d>
<d>-0.004637</d>
<d>-0.004637</d>
<d>-0.004637</d>
<d>0.001467</d>
<d>0.001467</d>
<d>-0.004637</d>
<d>-0.016844</d>
<d>-0.004637</d>
<d>-0.01074</d>
<d>-0.004637</d>
<d>-0.004637</d>
<d>-0.004637</d>
<d>0.001467</d>
<d>-0.01074</d>
<d>0.001467</d>
<d>-0.004637</d>
<d>0.00757</d>
<d>0.00757</d>
<d>0.019777</d>
<d>0.00757</d>
<d>-0.01074</d>
<d>0.001467</d>
<d>0.001467</d>
<d>0.00757</d>
<d>0.013674</d>
<d>0.001467</d>
<d>0.001467</d>
<d>0.00757</d>
<d>0.001467</d>
<d>-0.004637</d>
<d>0.00757</d>
<d>0.013674</d>
<d>0.013674</d>
<d>0.019777</d>
<d>0.001467</d>
<d>0.00757</d>
<d>0.013674</d>
<d>-0.01074</d>
<d>-0.016844</d>
<d>-0.022947</d>
<d>0.001467</d>
<d>0.001467</d>
<d>0.00757</d>
<d>0.00757</d>
<d>0.001467</d>
<d>0.001467</d>
<d>0.001467</d>
<d>0.013674</d>
<d>0.00757</d>
<d>0.00757</d>
<d>0.00757</d>
<d>0.001467</d>
<d>-0.004637</d>
<d>-0.01074</d>
<d>-0.004637</d>
<d>-0.01074</d>
<d>-0.016844</d>
<d>-0.01074</d>
<d>-0.004637</d>
<d>-0.016844</d>
<d>-0.004637</d>
<d>0.00757</d>
<d>0.00757</d>
<d>0.001467</d>
<d>-0.01074</d>
<d>-0.01074</d>
<d>0.001467</d>
<d>0.00757</d>
<d>0.019777</d>
<d>0.00757</d>
<d>-0.004637</d>
<d>0.001467</d>
<d>0.001467</d>
<d>0.013674</d>
<d>0.019777</d>
<d>0.001467</d>
<d>-0.004637</d>
<d>-0.016844</d>
<d>-0.01074</d>
<d>-0.004637</d>
<d>0.001467</d>
<d>0.001467</d>
<d>0.001467</d>
<d>0.001467</d>
<d>0.001467</d>
<d>0.001467</d>
<d>0.001467</d>
<d>0.00757</d>
<d>0.00757</d>
<d>0.001467</d>
<d>-0.01074</d>
<d>-0.004637</d>
<d>0.001467</d>
<d>0.001467</d>
<d>-0.004637</d>
<d>-0.004637</d>
<d>-0.004637</d>
<d>-0.01074</d>
<d>-0.029051</d>
<d>-0.004637</d>
<d>0.001467</d>
<d>-0.004637</d>
<d>-0.004637</d>
<d>-0.004637</d>
<d>-0.004637</d>
<d>-0.022947</d>
<d>-0.029051</d>
<d>-0.022947</d>
<d>-0.022947</d>
<d>0.001467</d>
<d>-0.01074</d>
<d>-0.004637</d>
<d>0.001467</d>
<d>0.001467</d>
<d>0.001467</d>
<d>-0.016844</d>
<d>-0.004637</d>
<d>-0.004637</d>
<d>-0.004637</d>
<d>-0.01074</d>
<d>-0.022947</d>
<d>-0.016844</d>
<d>-0.016844</d>
<d>-0.004637</d>
<d>0.013674</d>
<d>0.00757</d>
<d>0.013674</d>
<d>0.001467</d>
<d>0.00757</d>
<d>0.001467</d>
<d>-0.004637</d>
<d>-0.004637</d>
<d>0.00757</d>
<d>0.019777</d>
<d>0.001467</d>
<d>0.013674</d>
<d>0.013674</d>
<d>0.001467</d>
<d>-0.01074</d>
<d>-0.035154</d>
<d>-0.029051</d>
<d>-0.016844</d>
<d>-0.016844</d>
<d>-0.016844</d>
<d>-0.01074</d>
<d>-0.01074</d>
<d>-0.016844</d>
<d>-0.016844</d>
<d>-0.01074</d>
<d>0.00757</d>
<d>0.00757</d>
<d>-0.004637</d>
<d>0.001467</d>
<d>0.00757</d>
<d>-0.01074</d>
<d>0.00757</d>
<d>-0.004637</d>
<d>-0.01074</d>
<d>0.00757</d>
<d>0.001467</d>
<d>-0.004637</d>
<d>0.001467</d>
<d>0.00757</d>
<d>0.001467</d>
<d>0.001467</d>
<d>0.013674</d>
<d>-0.004637</d>
<d>-0.016844</d>
<d>-0.022947</d>
<d>-0.01074</d>
<d>-0.01074</d>
<d>-0.01074</d>
<d>-0.01074</d>
<d>-0.022947</d>
<d>-0.01074</d>
<d>-0.004637</d>
<d>-0.004637</d>
<d>-0.004637</d>
<d>-0.01074</d>
<d>-0.004637</d>
<d>-0.01074</d>
<d>0.001467</d>
<d>0.00757</d>
<d>0.00757</d>
<d>-0.004637</d>
<d>-0.004637</d>
<d>-0.004637</d>
<d>0.00757</d>
<d>-0.004637</d>
<d>-0.01074</d>
<d>-0.01074</d>
<d>-0.022947</d>
<d>-0.016844</d>
<d>-0.035154</d>
<d>-0.029051</d>
<d>-0.01074</d>
<d>-0.016844</d>
<d>-0.016844</d>
<d>-0.022947</d>
<d>-0.029051</d>
<d>-0.022947</d>
<d>-0.004637</d>
<d>-0.004637</d>
<d>0.001467</d>
<d>0.013674</d>
<d>0.001467</d>
<d>-0.01074</d>
<d>0.00757</d>
<d>0.001467</d>
<d>-0.004637</d>
<d>-0.004637</d>
<d>-0.004637</d>
<d>-0.01074</d>
<d>-0.022947</d>
<d>-0.035154</d>
<d>-0.029051</d>
<d>-0.016844</d>
<d>0.001467</d>
<d>0.001467</d>
<d>0.001467</d>
<d>0.00757</d>
<d>-0.01074</d>
<d>-0.01074</d>
<d>-0.022947</d>
<d>-0.016844</d>
<d>-0.016844</d>
<d>-0.01074</d>
<d>-0.01074</d>
<d>-0.01074</d>
<d>-0.01074</d>
<d>-0.01074</d>
<d>-0.01074</d>
<d>-0.01074</d>
<d>-0.004637</d>
<d>-0.01074</d>
<d>-0.01074</d>
<d>0.001467</d>
<d>-0.004637</d>
<d>0.001467</d>
<d>0.013674</d>
<d>0.00757</d>
<d>0.001467</d>
<d>-0.004637</d>
<d>-0.01074</d>
<d>-0.004637</d>
<d>-0.01074</d>
<d>0.00757</d>
<d>0.019777</d>
<d>0.013674</d>
<d>0.001467</d>
<d>-0.004637</d>
<d>0.001467</d>
<d>0.00757</d>
<d>0.013674</d>
<d>0.00757</d>
<d>-0.016844</d>
<d>0.001467</d>
<d>0.001467</d>
<d>0.001467</d>
<d>0.013674</d>
<d>0.013674</d>
<d>0.031984</d>
<d>0.013674</d>
<d>-0.004637</d>
<d>-0.022947</d>
<d>-0.022947</d>
<d>-0.01074</d>
<d>0.001467</d>
<d>0.001467</d>
<d>0.013674</d>
<d>0.025881</d>
<d>0.013674</d>
<d>0.001467</d>
<d>0.013674</d>
<d>0.001467</d>
<d>0.00757</d>
<d>0.019777</d>
<d>0.019777</d>
<d>0.013674</d>
<d>-0.004637</d>
<d>0.001467</d>
<d>0.001467</d>
<d>0.001467</d>
<d>0.001467</d>
<d>0.001467</d>
<d>0.001467</d>
<d>0.001467</d>
<d>0.00757</d>
<d>0.013674</d>
<d>0.019777</d>
<d>0.025881</d>
<d>0.013674</d>
<d>0.025881</d>
<d>0.019777</d>
<d>0.013674</d>
<d>0.013674</d>
<d>0.025881</d>
<d>0.025881</d>
<d>0.019777</d>
<d>0.025881</d>
<d>0.013674</d>
<d>0.00757</d>
<d>0.001467</d>
<d>-0.004637</d>
<d>-0.004637</d>
<d>-0.016844</d>
<d>-0.01074</d>
<d>-0.01074</d>
<d>0.001467</d>
<d>0.00757</d>
<d>0.00757</d>
<d>-0.01074</d>
<d>-0.01074</d>
<d>-0.016844</d>
<d>-0.016844</d>
<d>0.00757</d>
<d>0.013674</d>
<d>0.025881</d>
<d>0.019777</d>
<d>0.001467</d>
<d>0.00757</d>
<d>0.00757</d>
<d>0.00757</d>
<d>-0.004637</d>
<d>-0.01074</d>
<d>-0.004637</d>
<d>0.00757</d>
<d>0.001467</d>
<d>0.001467</d>
<d>-0.004637</d>
<d>0.013674</d>
<d>0.013674</d>
<d>0.00757</d>
<d>0.013674</d>
<d>0.001467</d>
<d>0.001467</d>
<d>0.025881</d>
<d>0.00757</d>
<d>0.001467</d>
<d>0.001467</d>
<d>0.00757</d>
<d>0.001467</d>
<d>0.013674</d>
<d>0.00757</d>
<d>0.00757</d>
<d>-0.004637</d>
<d>0.001467</d>
<d>0.00757</d>
<d>0.00757</d>
<d>-0.437986</d>
<d>-1.011717</d>
<d>-0.431883</d>
<d>0.300539</d>
<d>0.166262</d>
<d>0.038088</d>
<d>0.050295</d>
<d>0.068605</d>
<d>0.068605</d>
<d>0.068605</d>
<d>0.068605</d>
<d>0.050295</d>
<d>0.050295</d>
<d>0.038088</d>
<d>0.019777</d>
<d>0.013674</d>
<d>0.025881</d>
<d>0.025881</d>
<d>0.00757</d>
<d>0.00757</d>
<d>0.013674</d>
<d>0.019777</d>
<d>0.031984</d>
<d>0.019777</d>
<d>0.019777</d>
<d>0.025881</d>
<d>0.00757</d>
<d>0.019777</d>
<d>0.019777</d>
<d>0.019777</d>
<d>0.031984</d>
<d>0.038088</d>
<d>0.038088</d>
<d>0.044191</d>
<d>0.031984</d>
<d>0.031984</d>
<d>0.019777</d>
<d>0.001467</d>
<d>0.001467</d>
<d>0.00757</d>
<d>0.001467</d>
<d>0.019777</d>
<d>0.00757</d>
<d>0.001467</d>
<d>0.00757</d>
<d>0.013674</d>
<d>0.00757</d>
<d>0.00757</d>
<d>0.031984</d>
<d>0.025881</d>
<d>-0.041258</d>
<d>-0.071775</d>
<d>-0.077879</d>
<d>-0.059568</d>
<d>-0.029051</d>
<d>-0.01074</d>
<d>-0.01074</d>
<d>-0.022947</d>
<d>-0.022947</d>
<d>-0.016844</d>
<d>-0.01074</d>
<d>-0.016844</d>
<d>-0.022947</d>
<d>-0.022947</d>
<d>-0.022947</d>
<d>-0.029051</d>
<d>-0.035154</d>
<d>-0.029051</d>
<d>-0.035154</d>
<d>-0.035154</d>
<d>-0.035154</d>
<d>-0.035154</d>
<d>-0.065672</d>
<d>-0.071775</d>
<d>-0.077879</d>
<d>-0.077879</d>
<d>-0.071775</d>
<d>-0.059568</d>
<d>-0.065672</d>
<d>-0.059568</d>
<d>-0.071775</d>
<d>-0.083982</d>
<d>-0.090086</d>
<d>-0.090086</d>
<d>-0.090086</d>
<d>-0.090086</d>
<d>-0.077879</d>
<d>-0.077879</d>
<d>-0.083982</d>
<d>-0.096189</d>
<d>-0.1145</d>
<d>-0.138914</d>
<d>-0.151121</d>
<d>-0.157225</d>
<d>-0.151121</d>
<d>-0.126707</d>
<d>-0.126707</d>
<d>-0.126707</d>
<d>-0.120604</d>
<d>-0.126707</d>
<d>-0.132811</d>
<d>-0.132811</d>
<d>-0.126707</d>
<d>-0.138914</d>
<d>-0.145018</d>
<d>-0.138914</d>
<d>-0.145018</d>
<d>-0.145018</d>
<d>-0.132811</d>
<d>-0.138914</d>
<d>-0.138914</d>
<d>-0.157225</d>
<d>-0.151121</d>
<d>-0.145018</d>
<d>-0.138914</d>
<d>-0.132811</d>
<d>-0.145018</d>
<d>-0.157225</d>
<d>-0.145018</d>
<d>-0.145018</d>
<d>-0.151121</d>
<d>-0.157225</d>
<d>-0.138914</d>
<d>-0.138914</d>
<d>-0.138914</d>
<d>-0.138914</d>
<d>-0.151121</d>
<d>-0.145018</d>
<d>-0.157225</d>
<d>-0.151121</d>
<d>-0.163328</d>
<d>-0.163328</d>
<d>-0.151121</d>
<d>-0.145018</d>
<d>-0.145018</d>
<d>-0.138914</d>
<d>-0.126707</d>
<d>-0.138914</d>
<d>-0.151121</d>
<d>-0.145018</d>
<d>-0.145018</d>
<d>-0.138914</d>
<d>-0.132811</d>
<d>-0.145018</d>
<d>-0.145018</d>
<d>-0.151121</d>
<d>-0.138914</d>
<d>-0.126707</d>
<d>-0.126707</d>
<d>-0.126707</d>
<d>-0.138914</d>
<d>-0.132811</d>
<d>-0.1145</d>
<d>-0.126707</d>
<d>-0.132811</d>
<d>-0.126707</d>
<d>-0.120604</d>
<d>-0.120604</d>
<d>-0.120604</d>
<d>-0.132811</d>
<d>-0.132811</d>
<d>-0.120604</d>
<d>-0.120604</d>
<d>-0.1145</d>
<d>-0.1145</d>
<d>-0.1145</d>
<d>-0.108397</d>
<d>-0.108397</d>
<d>-0.120604</d>
<d>-0.108397</d>
<d>-0.108397</d>
<d>-0.108397</d>
<d>-0.102293</d>
<d>-0.096189</d>
<d>-0.108397</d>
<d>-0.096189</d>
<d>-0.090086</d>
<d>-0.096189</d>
<d>-0.090086</d>
<d>-0.083982</d>
<d>-0.096189</d>
<d>-0.096189</d>
<d>-0.096189</d>
<d>-0.090086</d>
<d>-0.090086</d>
<d>-0.090086</d>
<d>-0.071775</d>
<d>-0.083982</d>
<d>-0.077879</d>
<d>-0.090086</d>
<d>-0.090086</d>
<d>-0.083982</d>
<d>-0.077879</d>
<d>-0.077879</d>
<d>-0.083982</d>
<d>-0.090086</d>
<d>-0.083982</d>
<d>-0.083982</d>
<d>-0.083982</d>
<d>-0.065672</d>
<d>-0.071775</d>
<d>-0.077879</d>
<d>-0.077879</d>
<d>-0.090086</d>
<d>-0.096189</d>
<d>-0.102293</d>
<d>-0.083982</d>
<d>-0.090086</d>
<d>-0.083982</d>
<d>-0.077879</d>
<d>-0.071775</d>
<d>-0.071775</d>
<d>-0.083982</d>
<d>-0.077879</d>
<d>-0.065672</d>
<d>-0.077879</d>
<d>-0.065672</d>
<d>-0.065672</d>
<d>-0.065672</d>
<d>-0.059568</d>
<d>-0.053465</d>
<d>-0.065672</d>
<d>-0.071775</d>
<d>-0.071775</d>
<d>-0.071775</d>
<d>-0.083982</d>
<d>-0.083982</d>
<d>-0.077879</d>
<d>-0.090086</d>
<d>-0.083982</d>
<d>-0.065672</d>
<d>-0.071775</d>
<d>-0.071775</d>
<d>-0.065672</d>
<d>-0.071775</d>
<d>-0.059568</d>
<d>-0.071775</d>
<d>-0.059568</d>
<d>-0.041258</d>
<d>-0.065672</d>
<d>-0.071775</d>
<d>-0.077879</d>
<d>-0.077879</d>
<d>-0.077879</d>
<d>-0.096189</d>
<d>-0.077879</d>
<d>-0.077879</d>
<d>-0.071775</d>
<d>-0.065672</d>
<d>-0.071775</d>
<d>-0.065672</d>
<d>-0.047361</d>
<d>-0.047361</d>
<d>-0.029051</d>
<d>-0.029051</d>
<d>-0.029051</d>
<d>-0.035154</d>
<d>-0.041258</d>
<d>-0.047361</d>
<d>-0.059568</d>
<d>-0.053465</d>
<d>-0.041258</d>
<d>-0.041258</d>
<d>-0.053465</d>
<d>-0.041258</d>
<d>-0.041258</d>
<d>-0.041258</d>
<d>-0.053465</d>
<d>-0.047361</d>
<d>-0.053465</d>
<d>-0.065672</d>
<d>-0.053465</d>
<d>-0.047361</d>
<d>-0.041258</d>
<d>-0.029051</d>
<d>-0.041258</d>
<d>-0.041258</d>
<d>-0.041258</d>
<d>-0.035154</d>
<d>-0.041258</d>
<d>-0.047361</d>
<d>-0.053465</d>
<d>-0.053465</d>
<d>-0.041258</d>
<d>-0.029051</d>
<d>-0.022947</d>
<d>-0.01074</d>
<d>-0.016844</d>
<d>-0.041258</d>
<d>-0.041258</d>
<d>-0.041258</d>
<d>-0.047361</d>
<d>-0.047361</d>
<d>-0.053465</d>
<d>-0.047361</d>
<d>-0.041258</d>
<d>-0.053465</d>
<d>-0.035154</d>
<d>-0.022947</d>
<d>-0.029051</d>
<d>-0.029051</d>
<d>-0.022947</d>
<d>-0.022947</d>
<d>-0.016844</d>
<d>-0.016844</d>
<d>-0.029051</d>
<d>-0.029051</d>
<d>-0.035154</d>
<d>-0.035154</d>
<d>-0.029051</d>
<d>-0.041258</d>
<d>-0.029051</d>
<d>-0.01074</d>
<d>-0.029051</d>
<d>-0.022947</d>
<d>-0.035154</d>
<d>-0.016844</d>
<d>-0.016844</d>
<d>-0.004637</d>
<d>-0.016844</d>
<d>-0.029051</d>
<d>-0.035154</d>
<d>-0.029051</d>
<d>-0.01074</d>
<d>0.001467</d>
<d>-0.01074</d>
<d>-0.004637</d>
<d>0.001467</d>
<d>-0.004637</d>
<d>-0.022947</d>
<d>-0.029051</d>
<d>-0.016844</d>
<d>-0.022947</d>
<d>-0.016844</d>
<d>0.001467</d>
<d>-0.004637</d>
<d>-0.01074</d>
<d>-0.016844</d>
<d>-0.01074</d>
<d>-0.004637</d>
<d>-0.004637</d>
<d>-0.01074</d>
<d>-0.004637</d>
<d>-0.01074</d>
<d>-0.022947</d>
<d>-0.016844</d>
<d>-0.035154</d>
<d>-0.029051</d>
<d>-0.035154</d>
<d>-0.022947</d>
<d>-0.029051</d>
<d>-0.022947</d>
<d>-0.022947</d>
<d>-0.022947</d>
<d>-0.022947</d>
<d>-0.016844</d>
<d>-0.01074</d>
<d>-0.016844</d>
<d>-0.01074</d>
<d>-0.004637</d>
<d>0.001467</d>
<d>0.001467</d>
<d>0.00757</d>
<d>-0.004637</d>
<d>-0.01074</d>
<d>-0.01074</d>
<d>-0.022947</d>
<d>-0.016844</d>
<d>-0.016844</d>
<d>-0.016844</d>
<d>-0.004637</d>
<d>-0.01074</d>
<d>-0.01074</d>
<d>-0.004637</d>
<d>-0.016844</d>
<d>-0.01074</d>
<d>-0.01074</d>
<d>-0.022947</d>
<d>-0.016844</d>
<d>-0.016844</d>
<d>-0.016844</d>
<d>-0.016844</d>
<d>-0.01074</d>
<d>-0.016844</d>
<d>-0.004637</d>
<d>0.001467</d>
<d>0.001467</d>
<d>0.001467</d>
<d>0.00757</d>
<d>0.013674</d>
<d>0.001467</d>
<d>0.001467</d>
<d>0.001467</d>
<d>-0.004637</d>
<d>-0.004637</d>
<d>-0.004637</d>
<d>0.001467</d>
<d>0.001467</d>
<d>-0.01074</d>
<d>-0.01074</d>
<d>-0.016844</d>
<d>-0.004637</d>
<d>-0.004637</d>
<d>-0.01074</d>
<d>-0.01074</d>
<d>0.00757</d>
<d>0.001467</d>
<d>0.001467</d>
<d>-0.004637</d>
<d>-0.004637</d>
<d>-0.004637</d>
<d>0.001467</d>
<d>-0.01074</d>
<d>-0.022947</d>
<d>-0.016844</d>
<d>-0.004637</d>
<d>-0.022947</d>
<d>-0.029051</d>
<d>-0.004637</d>
<d>-0.01074</d>
<d>-0.016844</d>
<d>-0.022947</d>
<d>-0.029051</d>
<d>-0.022947</d>
<d>-0.004637</d>
<d>-0.01074</d>
<d>-0.004637</d>
<d>0.001467</d>
<d>0.001467</d>
<d>0.001467</d>
<d>-0.004637</d>
<d>-0.004637</d>
<d>-0.004637</d>
<d>-0.016844</d>
<d>-0.01074</d>
<d>-0.016844</d>
<d>-0.022947</d>
<d>-0.016844</d>
<d>0.001467</d>
<d>-0.004637</d>
<d>-0.004637</d>
<d>0.001467</d>
<d>0.001467</d>
<d>0.00757</d>
<d>0.001467</d>
<d>-0.004637</d>
<d>-0.022947</d>
<d>-0.01074</d>
<d>-0.029051</d>
<d>-0.041258</d>
<d>-0.029051</d>
<d>-0.022947</d>
<d>-0.035154</d>
<d>-0.041258</d>
<d>-0.041258</d>
<d>-0.022947</d>
<d>-0.01074</d>
<d>-0.01074</d>
<d>-0.004637</d>
<d>0.00757</d>
<d>0.001467</d>
<d>-0.016844</d>
<d>-0.004637</d>
<d>-0.01074</d>
<d>-0.016844</d>
<d>-0.004637</d>
<d>-0.01074</d>
<d>-0.004637</d>
<d>-0.004637</d>
<d>-0.004637</d>
<d>-0.004637</d>
<d>-0.022947</d>
<d>-0.029051</d>
<d>-0.022947</d>
<d>-0.016844</d>
<d>-0.01074</d>
<d>-0.01074</d>
<d>-0.016844</d>
<d>0.001467</d>
<d>0.001467</d>
<d>-0.004637</d>
<d>0.013674</d>
<d>-0.01074</d>
<d>-0.016844</d>
<d>0.001467</d>
<d>0.001467</d>
<d>0.001467</d>
<d>0.00757</d>
<d>0.001467</d>
<d>-0.004637</d>
<d>0.001467</d>
<d>0.00757</d>
<d>0.00757</d>
<d>0.00757</d>
<d>0.001467</d>
<d>-0.016844</d>
<d>-0.01074</d>
<d>-0.01074</d>
<d>-0.029051</d>
<d>-0.016844</d>
<d>-0.022947</d>
<d>-0.035154</d>
<d>-0.022947</d>
<d>-0.022947</d>
<d>-0.022947</d>
<d>-0.01074</d>
<d>-0.01074</d>
<d>-0.004637</d>
<d>0.00757</d>
<d>-0.004637</d>
<d>-0.004637</d>
<d>-0.004637</d>
<d>-0.004637</d>
<d>-0.029051</d>
<d>-0.016844</d>
<d>-0.01074</d>
<d>-0.022947</d>
<d>-0.01074</d>
<d>-0.004637</d>
<d>-0.004637</d>
<d>0.00757</d>
<d>0.013674</d>
<d>0.00757</d>
<d>-0.01074</d>
<d>-0.016844</d>
<d>-0.016844</d>
<d>-0.016844</d>
<d>0.001467</d>
<d>-0.01074</d>
<d>-0.004637</d>
<d>-0.01074</d>
<d>-0.01074</d>
<d>-0.01074</d>
<d>-0.01074</d>
<d>-0.01074</d>
<d>-0.016844</d>
<d>-0.01074</d>
<d>-0.004637</d>
<d>-0.01074</d>
<d>-0.035154</d>
<d>-0.022947</d>
<d>-0.01074</d>
<d>-0.01074</d>
<d>-0.004637</d>
<d>-0.01074</d>
<d>-0.022947</d>
<d>-0.029051</d>
<d>-0.022947</d>
<d>-0.016844</d>
<d>-0.004637</d>
<d>0.013674</d>
<d>0.00757</d>
<d>0.001467</d>
<d>0.013674</d>
<d>0.001467</d>
<d>-0.016844</d>
<d>-0.01074</d>
<d>-0.01074</d>
<d>0.001467</d>
<d>-0.004637</d>
<d>0.00757</d>
<d>-0.004637</d>
<d>0.001467</d>
<d>0.001467</d>
<d>-0.004637</d>
<d>0.001467</d>
<d>-0.004637</d>
<d>-0.004637</d>
<d>-0.004637</d>
<d>0.001467</d>
<d>-0.004637</d>
<d>0.001467</d>
<d>0.001467</d>
<d>-0.004637</d>
<d>-0.01074</d>
<d>-0.01074</d>
<d>-0.004637</d>
<d>0.013674</d>
<d>0.00757</d>
<d>0.001467</d>
<d>-0.016844</d>
<d>-0.01074</d>
<d>-0.01074</d>
<d>-0.004637</d>
<d>0.001467</d>
<d>0.00757</d>
<d>-0.004637</d>
<d>-0.004637</d>
<d>-0.004637</d>
<d>-0.004637</d>
<d>0.001467</d>
<d>-0.01074</d>
<d>-0.022947</d>
<d>0.001467</d>
<d>-0.004637</d>
<d>-0.004637</d>
<d>-0.01074</d>
<d>-0.01074</d>
<d>-0.01074</d>
<d>-0.01221</d>
<d>-0.01221</d>
<d>-0.0061</d>
<d>-0.0061</d>
<d>0.006104</d>
<d>-2.3e-007</d>
<d>-2.3e-007</d>
<d>0.006104</d>
<d>-2.3e-007</d>
<d>0.006104</d>
<d>-2.3e-007</d>
<d>-2.3e-007</d>
<d>-0.0061</d>
<d>-0.0061</d>
<d>0.006104</d>
<d>-2.3e-007</d>
<d>-0.0061</d>
<d>-2.3e-007</d>
<d>-2.3e-007</d>
<d>0.012207</d>
<d>-2.3e-007</d>
<d>-2.3e-007</d>
<d>-2.3e-007</d>
<d>-0.01221</d>
<d>-0.01221</d>
<d>-0.0061</d>
<d>-0.0061</d>
<d>-0.0061</d>
<d>-0.0061</d>
<d>-0.0061</d>
<d>-0.01221</d>
<d>-0.0061</d>
<d>-2.3e-007</d>
<d>-2.3e-007</d>
<d>0.006104</d>
<d>-2.3e-007</d>
<d>-0.0061</d>
<d>0.006104</d>
<d>-2.3e-007</d>
<d>-2.3e-007</d>
<d>-2.3e-007</d>
<d>-0.0061</d>
<d>0.012207</d>
<d>0.006104</d>
<d>-2.3e-007</d>
<d>0.006104</d>
<d>-0.0061</d>
<d>0.006104</d>
<d>-2.3e-007</d>
<d>-0.0061</d>
<d>-0.0061</d>
<d>-2.3e-007</d>
<d>0.012207</d>
<d>0.018311</d>
<d>0.012207</d>
<d>0.006104</d>
<d>-0.0061</d>
<d>-0.0061</d>
<d>-0.01221</d>
<d>-0.01831</d>
<d>-0.0061</d>
<d>-0.01221</d>
<d>-0.0061</d>
<d>-0.0061</d>
<d>-0.01221</d>
<d>-0.0061</d>
<d>-0.0061</d>
<d>-0.0061</d>
<d>0.006104</d>
<d>-0.0061</d>
<d>-0.0061</d>
<d>0.006104</d>
<d>-2.3e-007</d>
<d>-2.3e-007</d>
<d>-0.01221</d>
<d>-0.0061</d>
<d>-0.0061</d>
<d>-2.3e-007</d>
<d>0.012207</d>
<d>-2.3e-007</d>
<d>0.006104</d>
<d>0.006104</d>
<d>-2.3e-007</d>
<d>0.012207</d>
<d>-2.3e-007</d>
<d>0.006104</d>
<d>-0.0061</d>
<d>-0.0061</d>
<d>0.012207</d>
<d>0.012207</d>
<d>0.006104</d>
<d>-2.3e-007</d>
<d>-2.3e-007</d>
<d>-2.3e-007</d>
<d>-0.0061</d>
<d>-0.0061</d>
<d>-2.3e-007</d>
<d>0.006104</d>
<d>0.006104</d>
<d>0.012207</d>
<d>0.012207</d>
<d>0.012207</d>
<d>0.006104</d>
<d>0.006104</d>
<d>0.006104</d>
<d>-2.3e-007</d>
<d>-2.3e-007</d>
<d>-2.3e-007</d>
<d>-0.0061</d>
<d>-0.0061</d>
<d>-0.01221</d>
<d>-0.0061</d>
<d>-0.01221</d>
<d>-0.0061</d>
<d>-0.0061</d>
<d>-2.3e-007</d>
<d>-2.3e-007</d>
<d>-2.3e-007</d>
<d>-2.3e-007</d>
<d>-2.3e-007</d>
<d>-0.0061</d>
<d>-0.0061</d>
<d>-0.0061</d>
<d>-0.0061</d>
<d>-2.3e-007</d>
<d>-0.01221</d>
<d>-0.0061</d>
<d>0.006104</d>
<d>-2.3e-007</d>
<d>0.012207</d>
<d>-2.3e-007</d>
<d>0.006104</d>
<d>-2.3e-007</d>
<d>-2.3e-007</d>
<d>0.006104</d>
<d>-0.0061</d>
<d>-0.0061</d>
<d>-0.01221</d>
<d>-0.0061</d>
<d>-0.0061</d>
<d>-0.0061</d>
<d>-2.3e-007</d>
<d>-2.3e-007</d>
<d>-2.3e-007</d>
<d>-2.3e-007</d>
<d>-2.3e-007</d>
<d>-0.0061</d>
<d>-2.3e-007</d>
<d>-0.0061</d>
<d>-0.0061</d>
<d>-2.3e-007</d>
<d>-0.0061</d>
<d>-2.3e-007</d>
<d>-0.0061</d>
<d>-0.0061</d>
<d>-2.3e-007</d>
<d>-0.0061</d>
<d>0.006104</d>
<d>-0.0061</d>
<d>-2.3e-007</d>
<d>-0.01221</d>
<d>-0.01221</d>
<d>-0.01221</d>
<d>-0.0061</d>
<d>-0.0061</d>
<d>-0.0061</d>
<d>-0.01221</d>
<d>-2.3e-007</d>
<d>-2.3e-007</d>
<d>-2.3e-007</d>
<d>-2.3e-007</d>
<d>-0.0061</d>
<d>-2.3e-007</d>
<d>-0.0061</d>
<d>-0.0061</d>
<d>-0.0061</d>
<d>-0.01221</d>
<d>-2.3e-007</d>
<d>-2.3e-007</d>
<d>-2.3e-007</d>
<d>0.006104</d>
<d>-0.0061</d>
<d>0.006104</d>
<d>-2.3e-007</d>
<d>-2.3e-007</d>
<d>0.006104</d>
<d>-2.3e-007</d>
<d>-2.3e-007</d>
<d>-2.3e-007</d>
<d>-2.3e-007</d>
<d>0.006104</d>
<d>0.006104</d>
<d>-2.3e-007</d>
<d>-2.3e-007</d>
<d>-2.3e-007</d>
<d>0.006104</d>
<d>0.006104</d>
<d>0.006104</d>
<d>0.006104</d>
<d>-0.01221</d>
<d>-2.3e-007</d>
<d>-2.3e-007</d>
<d>-0.0061</d>
<d>-2.3e-007</d>
<d>-0.01221</d>
<d>-2.3e-007</d>
<d>-2.3e-007</d>
<d>-0.0061</d>
<d>0.012207</d>
<d>0.012207</d>
<d>0.006104</d>
<d>0.006104</d>
<d>-0.0061</d>
<d>-0.01221</d>
<d>-0.01221</d>
<d>-0.01221</d>
<d>-0.0061</d>
<d>-0.01221</d>
<d>-0.0061</d>
<d>-2.3e-007</d>
<d>0.006104</d>
<d>-2.3e-007</d>
<d>-2.3e-007</d>
<d>0.006104</d>
<d>0.012207</d>
<d>0.006104</d>
<d>0.012207</d>
<d>0.006104</d>
<d>0.012207</d>
<d>0.006104</d>
<d>0.006104</d>
<d>0.012207</d>
<d>-2.3e-007</d>
<d>-2.3e-007</d>
<d>-0.0061</d>
<d>-0.01221</d>
<d>-2.3e-007</d>
<d>-0.0061</d>
<d>-0.0061</d>
<d>-0.0061</d>
<d>-0.0061</d>
<d>0.006104</d>
<d>-2.3e-007</d>
<d>-2.3e-007</d>
<d>0.012207</d>
<d>0.006104</d>
<d>0.012207</d>
<d>0.012207</d>
<d>0.006104</d>
<d>0.006104</d>
<d>-2.3e-007</d>
<d>-0.0061</d>
<d>-2.3e-007</d>
<d>-2.3e-007</d>
<d>-2.3e-007</d>
<d>-2.3e-007</d>
<d>-0.0061</d>
<d>-2.3e-007</d>
<d>-0.01221</d>
<d>-2.3e-007</d>
<d>-2.3e-007</d>
<d>-0.0061</d>
<d>-0.0061</d>
<d>-0.01221</d>
<d>-2.3e-007</d>
<d>-0.0061</d>
<d>-0.0061</d>
<d>-0.0061</d>
<d>-0.01221</d>
<d>-0.0061</d>
<d>-2.3e-007</d>
<d>-2.3e-007</d>
<d>0.006104</d>
<d>0.006104</d>
<d>0.006104</d>
<d>-2.3e-007</d>
<d>-2.3e-007</d>
<d>0.006104</d>
<d>0.006104</d>
<d>-2.3e-007</d>
<d>-2.3e-007</d>
<d>-0.0061</d>
<d>-2.3e-007</d>
<d>-0.0061</d>
<d>-0.0061</d>
<d>-0.01221</d>
<d>-0.01221</d>
<d>-0.0061</d>
<d>-0.0061</d>
<d>-2.3e-007</d>
<d>-2.3e-007</d>
<d>-0.0061</d>
<d>-0.0061</d>
<d>-0.0061</d>
<d>-0.0061</d>
<d>0.006104</d>
<d>-2.3e-007</d>
<d>-2.3e-007</d>
<d>-2.3e-007</d>
<d>-0.01221</d>
<d>-0.01221</d>
<d>-2.3e-007</d>
<d>0.012207</d>
<d>0.012207</d>
<d>0.012207</d>
<d>0.012207</d>
<d>-2.3e-007</d>
<d>-2.3e-007</d>
<d>-2.3e-007</d>
<d>-2.3e-007</d>
<d>0.006104</d>
<d>-0.0061</d>
<d>0.006104</d>
<d>-2.3e-007</d>
<d>-2.3e-007</d>
<d>0.006104</d>
<d>0.006104</d>
<d>0.006104</d>
<d>-2.3e-007</d>
<d>-0.0061</d>
<d>0.006104</d>
<d>0.006104</d>
<d>-2.3e-007</d>
<d>-0.0061</d>
<d>-2.3e-007</d>
<d>-0.0061</d>
<d>-2.3e-007</d>
<d>-0.0061</d>
<d>0.006104</d>
<d>-2.3e-007</d>
<d>0.006104</d>
<d>0.012207</d>
<d>-0.0061</d>
<d>0.012207</d>
<d>0.006104</d>
<d>0.006104</d>
<d>0.006104</d>
<d>-2.3e-007</d>
<d>0.012207</d>
<d>-2.3e-007</d>
<d>-0.0061</d>
<d>-0.0061</d>
<d>-0.0061</d>
<d>-2.3e-007</d>
<d>0.006104</d>
<d>0.006104</d>
<d>-2.3e-007</d>
<d>0.006104</d>
<d>0.012207</d>
<d>0.018311</d>
<d>0.012207</d>
<d>0.018311</d>
<d>0.006104</d>
<d>-2.3e-007</d>
<d>-2.3e-007</d>
<d>-2.3e-007</d>
<d>0.006104</d>
<d>-2.3e-007</d>
<d>0.006104</d>
<d>0.006104</d>
<d>-2.3e-007</d>
<d>0.006104</d>
<d>-2.3e-007</d>
<d>-2.3e-007</d>
<d>-2.3e-007</d>
<d>-2.3e-007</d>
<d>0.006104</d>
<d>0.006104</d>
<d>-2.3e-007</d>
<d>0.006104</d>
<d>-0.0061</d>
<d>-2.3e-007</d>
<d>-2.3e-007</d>
<d>-0.0061</d>
<d>-2.3e-007</d>
<d>-0.0061</d>
<d>-2.3e-007</d>
<d>0.006104</d>
<d>-0.0061</d>
<d>0.006104</d>
<d>0.006104</d>
<d>0.006104</d>
<d>0.012207</d>
<d>0.006104</d>
<d>0.018311</d>
<d>0.006104</d>
<d>0.006104</d>
<d>-2.3e-007</d>
<d>-2.3e-007</d>
<d>0.012207</d>
<d>0.012207</d>
<d>-2.3e-007</d>
<d>0.006104</d>
<d>-2.3e-007</d>
<d>0.006104</d>
<d>0.012207</d>
<d>-2.3e-007</d>
<d>-2.3e-007</d>
<d>-0.0061</d>
<d>-2.3e-007</d>
<d>-2.3e-007</d>
<d>-0.0061</d>
<d>0.012207</d>
<d>-2.3e-007</d>
<d>0.006104</d>
<d>-2.3e-007</d>
<d>-0.01221</d>
<d>-2.3e-007</d>
<d>-2.3e-007</d>
<d>-0.0061</d>
<d>-2.3e-007</d>
<d>-2.3e-007</d>
<d>-2.3e-007</d>
<d>-2.3e-007</d>
<d>-0.0061</d>
<d>0.006104</d>
<d>-0.0061</d>
<d>0.006104</d>
<d>-0.0061</d>
<d>-0.0061</d>
<d>-0.0061</d>
<d>-0.01221</d>
<d>-2.3e-007</d>
<d>-0.0061</d>
<d>-0.0061</d>
<d>-0.01221</d>
<d>-0.01221</d>
<d>-0.01221</d>
<d>-0.01221</d>
<d>-0.0061</d>
<d>0.012207</d>
<d>-2.3e-007</d>
<d>-2.3e-007</d>
<d>-0.0061</d>
<d>-0.01221</d>
<d>-2.3e-007</d>
<d>-2.3e-007</d>
<d>-2.3e-007</d>
<d>-2.3e-007</d>
<d>-2.3e-007</d>
<d>0.006104</d>
<d>0.006104</d>
<d>-2.3e-007</d>
<d>0.006104</d>
<d>-2.3e-007</d>
<d>0.006104</d>
<d>0.012207</d>
<d>0.006104</d>
<d>0.006104</d>
<d>-0.0061</d>
<d>-0.01221</d>
<d>-0.0061</d>
<d>-0.01221</d>
<d>-0.0061</d>
<d>-0.01221</d>
<d>-0.01221</d>
<d>-0.01221</d>
<d>-0.01221</d>
<d>-0.0061</d>
<d>-0.01221</d>
<d>-0.0061</d>
<d>-0.01221</d>
<d>-0.01221</d>
<d>-0.0061</d>
<d>-0.01221</d>
<d>-0.01221</d>
<d>-0.0061</d>
<d>-0.01221</d>
<d>0.006104</d>
<d>0.006104</d>
<d>0.006104</d>
<d>0.012207</d>
<d>-0.0061</d>
<d>0.006104</d>
<d>0.006104</d>
<d>-0.0061</d>
<d>0.006104</d>
<d>-2.3e-007</d>
<d>-2.3e-007</d>
<d>-2.3e-007</d>
<d>0.006104</d>
<d>0.006104</d>
<d>-2.3e-007</d>
<d>0.006104</d>
<d>-2.3e-007</d>
<d>-2.3e-007</d>
<d>0.006104</d>
<d>0.006104</d>
<d>-2.3e-007</d>
<d>-2.3e-007</d>
<d>-0.0061</d>
<d>-2.3e-007</d>
<d>-0.0061</d>
<d>-2.3e-007</d>
<d>0.006104</d>
<d>-0.0061</d>
<d>0.006104</d>
<d>-2.3e-007</d>
<d>-0.0061</d>
<d>-0.0061</d>
<d>-0.01221</d>
<d>-0.01221</d>
<d>-2.3e-007</d>
<d>-0.0061</d>
<d>-2.3e-007</d>
<d>-2.3e-007</d>
<d>-0.0061</d>
<d>-0.01221</d>
<d>-0.01221</d>
<d>-0.0061</d>
<d>-2.3e-007</d>
<d>-2.3e-007</d>
<d>-2.3e-007</d>
<d>-0.0061</d>
<d>-2.3e-007</d>
<d>0.006104</d>
<d>-2.3e-007</d>
<d>0.006104</d>
<d>-0.0061</d>
<d>-2.3e-007</d>
<d>-0.0061</d>
<d>-0.0061</d>
<d>-2.3e-007</d>
<d>-2.3e-007</d>
<d>-2.3e-007</d>
<d>-0.0061</d>
<d>-0.0061</d>
<d>0.012207</d>
<d>-0.0061</d>
<d>-2.3e-007</d>
<d>-0.0061</d>
<d>-0.0061</d>
<d>-0.0061</d>
<d>-0.01221</d>
<d>-0.0061</d>
<d>-2.3e-007</d>
<d>-0.0061</d>
<d>-2.3e-007</d>
<d>-0.01221</d>
<d>-0.0061</d>
<d>-0.0061</d>
<d>-0.0061</d>
<d>-2.3e-007</d>
<d>0.006104</d>
<d>0.012207</d>
<d>0.012207</d>
<d>0.012207</d>
<d>0.012207</d>
<d>0.012207</d>
<d>-2.3e-007</d>
<d>0.006104</d>
<d>-0.0061</d>
<d>-0.0061</d>
<d>-0.0061</d>
<d>-0.0061</d>
<d>-2.3e-007</d>
<d>-0.0061</d>
<d>-0.0061</d>
<d>-2.3e-007</d>
<d>-0.0061</d>
<d>-0.0061</d>
<d>-0.0061</d>
<d>-0.0061</d>
<d>-2.3e-007</d>
<d>-2.3e-007</d>
<d>0.006104</d>
<d>0.006104</d>
<d>-0.0061</d>
<d>-0.0061</d>
<d>-0.01221</d>
<d>-0.0061</d>
<d>-0.01221</d>
<d>-0.01221</d>
<d>-2.3e-007</d>
<d>-0.0061</d>
<d>-0.0061</d>
<d>-0.0061</d>
<d>-0.0061</d>
<d>-2.3e-007</d>
<d>-2.3e-007</d>
<d>-2.3e-007</d>
<d>-2.3e-007</d>
<d>-0.0061</d>
<d>0.006104</d>
<d>0.006104</d>
<d>0.006104</d>
<d>-2.3e-007</d>
<d>-0.0061</d>
<d>-2.3e-007</d>
<d>0.006104</d>
<d>-2.3e-007</d>
<d>-2.3e-007</d>
<d>-0.0061</d>
<d>-0.0061</d>
<d>-2.3e-007</d>
<d>-2.3e-007</d>
<d>0.012207</d>
<d>0.006104</d>
<d>-2.3e-007</d>
<d>-0.0061</d>
<d>-0.01221</d>
<d>-0.01221</d>
<d>-0.01221</d>
<d>-0.0061</d>
<d>-0.0061</d>
<d>-0.0061</d>
<d>-2.3e-007</d>
<d>-2.3e-007</d>
<d>-2.3e-007</d>
<d>-0.0061</d>
<d>-2.3e-007</d>
<d>0.006104</d>
<d>0.006104</d>
<d>0.012207</d>
<d>0.018311</d>
<d>0.006104</d>
<d>0.012207</d>
<d>0.006104</d>
<d>-2.3e-007</d>
<d>0.006104</d>
<d>-2.3e-007</d>
<d>-2.3e-007</d>
<d>0.006104</d>
<d>0.006104</d>
<d>0.012207</d>
<d>0.006104</d>
<d>-2.3e-007</d>
<d>0.006104</d>
<d>-2.3e-007</d>
<d>0.012207</d>
<d>0.006104</d>
<d>-2.3e-007</d>
<d>-2.3e-007</d>
<d>-0.0061</d>
<d>0.006104</d>
<d>0.006104</d>
<d>0.006104</d>
<d>0.006104</d>
<d>-0.0061</d>
<d>-0.0061</d>
<d>-0.01221</d>
<d>-0.0061</d>
<d>-0.0061</d>
<d>-0.01221</d>
<d>0.006104</d>
<d>-0.0061</d>
<d>-0.01221</d>
<d>-0.01221</d>
<d>-0.01221</d>
<d>-0.0061</d>
<d>-2.3e-007</d>
<d>-0.01221</d>
<d>-0.0061</d>
<d>-0.01221</d>
<d>-0.01221</d>
<d>-0.01221</d>
<d>-0.01221</d>
<d>0.006104</d>
<d>-2.3e-007</d>
<d>0.006104</d>
<d>-0.0061</d>
<d>-0.01221</d>
<d>-0.0061</d>
<d>-2.3e-007</d>
<d>-2.3e-007</d>
<d>0.006104</d>
<d>-0.0061</d>
<d>0.006104</d>
<d>-2.3e-007</d>
<d>-0.0061</d>
<d>-2.3e-007</d>
<d>-2.3e-007</d>
<d>-2.3e-007</d>
<d>-2.3e-007</d>
<d>-0.0061</d>
<d>-0.0061</d>
<d>-0.01221</d>
<d>-0.01221</d>
<d>-0.01221</d>
<d>-0.01221</d>
<d>-2.3e-007</d>
<d>0.006104</d>
<d>0.012207</d>
<d>0.012207</d>
<d>-0.0061</d>
<d>0.006104</d>
<d>-2.3e-007</d>
<d>-2.3e-007</d>
<d>0.006104</d>
<d>0.006104</d>
<d>0.018311</d>
<d>0.012207</d>
<d>0.012207</d>
<d>0.006104</d>
<d>-2.3e-007</d>
<d>0.006104</d>
<d>-0.0061</d>
<d>-0.0061</d>
<d>-2.3e-007</d>
<d>-0.0061</d>
<d>-0.0061</d>
<d>-0.0061</d>
<d>-0.01221</d>
<d>-0.0061</d>
<d>-2.3e-007</d>
<d>0.006104</d>
<d>0.012207</d>
<d>-0.0061</d>
<d>0.012207</d>
<d>-2.3e-007</d>
<d>0.006104</d>
<d>-2.3e-007</d>
<d>-0.0061</d>
<d>-0.01221</d>
<d>-0.0061</d>
<d>-0.0061</d>
<d>-0.01221</d>
<d>-0.01221</d>
<d>-0.01221</d>
<d>-0.01221</d>
<d>-0.01221</d>
<d>-0.01221</d>
<d>-0.01221</d>
<d>0.006104</d>
<d>0.018311</d>
<d>0.012207</d>
<d>0.006104</d>
<d>-2.3e-007</d>
<d>-2.3e-007</d>
<d>-2.3e-007</d>
<d>-2.3e-007</d>
<d>0.006104</d>
<d>0.006104</d>
<d>-2.3e-007</d>
<d>-2.3e-007</d>
<d>-2.3e-007</d>
<d>0.012207</d>
<d>0.018311</d>
<d>0.006104</d>
<d>0.006104</d>
<d>-2.3e-007</d>
<d>0.006104</d>
<d>0.006104</d>
<d>-2.3e-007</d>
<d>-2.3e-007</d>
<d>-0.0061</d>
<d>-2.3e-007</d>
<d>0.012207</d>
<d>-2.3e-007</d>
<d>0.006104</d>
<d>-2.3e-007</d>
<d>0.006104</d>
<d>-2.3e-007</d>
<d>-2.3e-007</d>
<d>0.012207</d>
<d>0.006104</d>
<d>0.006104</d>
<d>0.006104</d>
<d>-2.3e-007</d>
<d>0.012207</d>
<d>0.006104</d>
<d>-2.3e-007</d>
<d>-0.0061</d>
<d>-0.0061</d>
<d>-2.3e-007</d>
<d>0.006104</d>
<d>-0.0061</d>
<d>-2.3e-007</d>
<d>0.006104</d>
<d>-2.3e-007</d>
<d>-2.3e-007</d>
<d>-0.0061</d>
<d>-0.0061</d>
<d>-0.01221</d>
<d>-2.3e-007</d>
<d>-2.3e-007</d>
<d>-0.0061</d>
<d>-2.3e-007</d>
<d>-0.0061</d>
<d>-0.0061</d>
<d>-0.0061</d>
<d>-0.0061</d>
<d>-0.0061</d>
<d>-2.3e-007</d>
<d>-2.3e-007</d>
<d>-2.3e-007</d>
<d>-2.3e-007</d>
<d>0.006104</d>
<d>-2.3e-007</d>
<d>0.006104</d>
<d>0.006104</d>
<d>-2.3e-007</d>
<d>0.006104</d>
<d>0.012207</d>
<d>0.006104</d>
<d>0.018311</d>
<d>0.012207</d>
<d>0.006104</d>
<d>0.006104</d>
<d>-2.3e-007</d>
<d>0.012207</d>
<d>-0.03052</d>
<d>-0.21362</d>
<d>-0.29297</d>
<d>-0.10986</d>
<d>0.219727</d>
<d>0.646973</d>
<d>0.872803</d>
<d>0.744629</d>
<d>0.445557</d>
<d>0.177002</d>
<d>0.030518</d>
<d>-0.01221</d>
<d>-0.0061</d>
<d>-2.3e-007</d>
<d>-2.3e-007</d>
<d>-0.0061</d>
<d>-0.01221</d>
<d>-0.01221</d>
<d>-0.01221</d>
<d>-2.3e-007</d>
<d>-0.0061</d>
<d>-2.3e-007</d>
<d>-2.3e-007</d>
<d>-2.3e-007</d>
<d>0.012207</d>
<d>0.012207</d>
<d>0.012207</d>
<d>0.024414</d>
<d>0.024414</d>
<d>0.024414</d>
<d>0.018311</d>
<d>0.006104</d>
<d>0.018311</d>
<d>0.018311</d>
<d>0.012207</d>
<d>-2.3e-007</d>
<d>-0.01221</d>
<d>-0.0061</d>
<d>0.006104</d>
<d>0.012207</d>
<d>0.024414</d>
<d>0.012207</d>
<d>0.018311</d>
<d>0.012207</d>
<d>0.006104</d>
<d>0.012207</d>
<d>-2.3e-007</d>
<d>0.012207</d>
<d>0.006104</d>
<d>0.012207</d>
<d>0.024414</d>
<d>0.018311</d>
<d>0.024414</d>
<d>0.018311</d>
<d>0.012207</d>
<d>0.018311</d>
<d>0.012207</d>
<d>0.018311</d>
<d>0.024414</d>
<d>0.018311</d>
<d>0.030518</d>
<d>0.024414</d>
<d>0.006104</d>
<d>-2.3e-007</d>
<d>-0.01221</d>
<d>-0.01221</d>
<d>-0.0061</d>
<d>-0.0061</d>
<d>-0.0061</d>
<d>-0.01221</d>
<d>-0.0061</d>
<d>-2.3e-007</d>
<d>-0.0061</d>
<d>-0.0061</d>
<d>-0.0061</d>
<d>-0.01831</d>
<d>-0.01831</d>
<d>-0.03052</d>
<d>-0.02441</d>
<d>-0.02441</d>
<d>-0.03052</d>
<d>-0.02441</d>
<d>-0.03052</d>
<d>-0.02441</d>
<d>-0.03052</d>
<d>-0.03052</d>
<d>-0.03052</d>
<d>-0.03662</d>
<d>-0.02441</d>
<d>-0.03052</d>
<d>-0.03052</d>
<d>-0.03662</d>
<d>-0.06104</d>
<d>-0.05493</d>
<d>-0.06104</d>
<d>-0.04883</d>
<d>-0.03662</d>
<d>-0.04273</d>
<d>-0.04273</d>
<d>-0.03662</d>
<d>-0.03662</d>
<d>-0.02441</d>
<d>-0.04273</d>
<d>-0.05493</d>
<d>-0.06714</d>
<d>-0.07324</d>
<d>-0.06104</d>
<d>-0.06714</d>
<d>-0.06714</d>
<d>-0.06714</d>
<d>-0.05493</d>
<d>-0.04883</d>
<d>-0.04883</d>
<d>-0.05493</d>
<d>-0.06104</d>
<d>-0.06714</d>
<d>-0.07324</d>
<d>-0.06714</d>
<d>-0.07324</d>
<d>-0.06714</d>
<d>-0.09155</d>
<d>-0.09155</d>
<d>-0.08545</d>
<d>-0.09155</d>
<d>-0.08545</d>
<d>-0.08545</d>
<d>-0.08545</d>
<d>-0.09155</d>
<d>-0.09766</d>
<d>-0.09766</d>
<d>-0.10986</d>
<d>-0.10986</d>
<d>-0.10986</d>
<d>-0.10986</d>
<d>-0.10376</d>
<d>-0.10986</d>
<d>-0.11597</d>
<d>-0.12207</d>
<d>-0.13428</d>
<d>-0.13428</d>
<d>-0.14038</d>
<d>-0.14038</d>
<d>-0.13428</d>
<d>-0.15259</d>
<d>-0.14648</d>
<d>-0.14648</d>
<d>-0.15259</d>
<d>-0.15259</d>
<d>-0.15869</d>
<d>-0.15259</d>
<d>-0.15869</d>
<d>-0.1648</d>
<d>-0.15869</d>
<d>-0.1648</d>
<d>-0.177</d>
<d>-0.18921</d>
<d>-0.19531</d>
<d>-0.19531</d>
<d>-0.19531</d>
<d>-0.20752</d>
<d>-0.20142</d>
<d>-0.20142</d>
<d>-0.18921</d>
<d>-0.18921</d>
<d>-0.20142</d>
<d>-0.19531</d>
<d>-0.20752</d>
<d>-0.19531</d>
<d>-0.19531</d>
<d>-0.19531</d>
<d>-0.19531</d>
<d>-0.20752</d>
<d>-0.20752</d>
<d>-0.19531</d>
<d>-0.20752</d>
<d>-0.20752</d>
<d>-0.21362</d>
<d>-0.21362</d>
<d>-0.20752</d>
<d>-0.21362</d>
<d>-0.20142</d>
<d>-0.21362</d>
<d>-0.22583</d>
<d>-0.22583</d>
<d>-0.23804</d>
<d>-0.23193</d>
<d>-0.22583</d>
<d>-0.23804</d>
<d>-0.23193</d>
<d>-0.24414</d>
<d>-0.24414</d>
<d>-0.23804</d>
<d>-0.25024</d>
<d>-0.23804</d>
<d>-0.25024</d>
<d>-0.23193</d>
<d>-0.22583</d>
<d>-0.23804</d>
<d>-0.22583</d>
<d>-0.23193</d>
<d>-0.23193</d>
<d>-0.24414</d>
<d>-0.25024</d>
<d>-0.23804</d>
<d>-0.23804</d>
<d>-0.23804</d>
<d>-0.24414</d>
<d>-0.25024</d>
<d>-0.25024</d>
<d>-0.25635</d>
<d>-0.26856</d>
<d>-0.26856</d>
<d>-0.26245</d>
<d>-0.24414</d>
<d>-0.23804</d>
<d>-0.24414</d>
<d>-0.24414</d>
<d>-0.26245</d>
<d>-0.24414</d>
<d>-0.24414</d>
<d>-0.24414</d>
<d>-0.23193</d>
<d>-0.23193</d>
<d>-0.22583</d>
<d>-0.23804</d>
<d>-0.23804</d>
<d>-0.22583</d>
<d>-0.22583</d>
<d>-0.22583</d>
<d>-0.22583</d>
<d>-0.23804</d>
<d>-0.22583</d>
<d>-0.22583</d>
<d>-0.22583</d>
<d>-0.22583</d>
<d>-0.24414</d>
<d>-0.23804</d>
<d>-0.23193</d>
<d>-0.22583</d>
<d>-0.21362</d>
<d>-0.21973</d>
<d>-0.20752</d>
<d>-0.21973</d>
<d>-0.22583</d>
<d>-0.23804</d>
<d>-0.25024</d>
<d>-0.23804</d>
<d>-0.23193</d>
<d>-0.23193</d>
<d>-0.22583</d>
<d>-0.23193</d>
<d>-0.22583</d>
<d>-0.21973</d>
<d>-0.21973</d>
<d>-0.21362</d>
<d>-0.20142</d>
<d>-0.20142</d>
<d>-0.20142</d>
<d>-0.21362</d>
<d>-0.21973</d>
<d>-0.21973</d>
<d>-0.22583</d>
<d>-0.22583</d>
<d>-0.22583</d>
<d>-0.22583</d>
<d>-0.22583</d>
<d>-0.22583</d>
<d>-0.21362</d>
<d>-0.21362</d>
<d>-0.20752</d>
<d>-0.21362</d>
<d>-0.21973</d>
<d>-0.20142</d>
<d>-0.20142</d>
<d>-0.19531</d>
<d>-0.20142</d>
<d>-0.20752</d>
<d>-0.19531</d>
<d>-0.20752</d>
<d>-0.20752</d>
<d>-0.20752</d>
<d>-0.21362</d>
<d>-0.20142</d>
<d>-0.20142</d>
<d>-0.19531</d>
<d>-0.19531</d>
<d>-0.20752</d>
<d>-0.18311</d>
<d>-0.18311</d>
<d>-0.18311</d>
<d>-0.18921</d>
<d>-0.21362</d>
<d>-0.20752</d>
<d>-0.20142</d>
<d>-0.20142</d>
<d>-0.18921</d>
<d>-0.19531</d>
<d>-0.19531</d>
<d>-0.18921</d>
<d>-0.18311</d>
<d>-0.1709</d>
<d>-0.18311</d>
<d>-0.177</d>
<d>-0.18311</d>
<d>-0.18921</d>
<d>-0.1709</d>
<d>-0.177</d>
<d>-0.18311</d>
<d>-0.18311</d>
<d>-0.18921</d>
<d>-0.18311</d>
<d>-0.1709</d>
<d>-0.18311</d>
<d>-0.18311</d>
<d>-0.18921</d>
<d>-0.18311</d>
<d>-0.177</d>
<d>-0.18311</d>
<d>-0.177</d>
<d>-0.19531</d>
<d>-0.18311</d>
<d>-0.18921</d>
<d>-0.18921</d>
<d>-0.177</d>
<d>-0.177</d>
<d>-0.1648</d>
<d>-0.1709</d>
<d>-0.1648</d>
<d>-0.15259</d>
<d>-0.15869</d>
<d>-0.1648</d>
<d>-0.1709</d>
<d>-0.177</d>
<d>-0.1648</d>
<d>-0.1648</d>
<d>-0.1648</d>
<d>-0.15869</d>
<d>-0.1648</d>
<d>-0.15869</d>
<d>-0.15259</d>
<d>-0.1648</d>
<d>-0.1648</d>
<d>-0.1709</d>
<d>-0.15869</d>
<d>-0.15869</d>
<d>-0.15869</d>
<d>-0.15259</d>
<d>-0.15259</d>
<d>-0.14038</d>
<d>-0.13428</d>
<d>-0.13428</d>
<d>-0.13428</d>
<d>-0.14038</d>
<d>-0.15259</d>
<d>-0.15259</d>
<d>-0.1648</d>
<d>-0.14648</d>
<d>-0.15259</d>
<d>-0.15869</d>
<d>-0.14648</d>
<d>-0.15259</d>
<d>-0.14038</d>
<d>-0.14038</d>
<d>-0.14038</d>
<d>-0.13428</d>
<d>-0.14038</d>
<d>-0.12817</d>
<d>-0.12817</d>
<d>-0.14038</d>
<d>-0.12817</d>
<d>-0.14038</d>
<d>-0.14038</d>
<d>-0.12817</d>
<d>-0.13428</d>
<d>-0.12207</d>
<d>-0.14038</d>
<d>-0.14038</d>
<d>-0.14038</d>
<d>-0.13428</d>
<d>-0.12207</d>
<d>-0.11597</d>
<d>-0.11597</d>
<d>-0.10986</d>
<d>-0.12207</d>
<d>-0.10986</d>
<d>-0.11597</d>
<d>-0.12207</d>
<d>-0.12207</d>
<d>-0.13428</d>
<d>-0.12207</d>
<d>-0.12207</d>
<d>-0.11597</d>
<d>-0.11597</d>
<d>-0.12207</d>
<d>-0.12207</d>
<d>-0.12207</d>
<d>-0.12207</d>
<d>-0.12817</d>
<d>-0.14038</d>
<d>-0.13428</d>
<d>-0.12817</d>
<d>-0.12207</d>
<d>-0.10986</d>
<d>-0.10376</d>
<d>-0.10376</d>
<d>-0.10376</d>
<d>-0.11597</d>
<d>-0.10986</d>
<d>-0.10986</d>
<d>-0.10376</d>
<d>-0.10376</d>
<d>-0.10986</d>
<d>-0.09766</d>
<d>-0.10376</d>
<d>-0.10376</d>
<d>-0.10986</d>
<d>-0.11597</d>
<d>-0.10986</d>
<d>-0.10376</d>
<d>-0.10376</d>
<d>-0.09766</d>
<d>-0.09766</d>
<d>-0.09766</d>
<d>-0.10376</d>
<d>-0.10986</d>
<d>-0.10986</d>
<d>-0.10986</d>
<d>-0.11597</d>
<d>-0.11597</d>
<d>-0.10986</d>
<d>-0.09766</d>
<d>-0.09766</d>
<d>-0.09155</d>
<d>-0.09766</d>
<d>-0.10986</d>
<d>-0.09766</d>
<d>-0.10376</d>
<d>-0.10376</d>
<d>-0.10376</d>
<d>-0.10376</d>
<d>-0.10376</d>
<d>-0.10376</d>
<d>-0.10986</d>
<d>-0.09155</d>
<d>-0.09766</d>
<d>-0.09766</d>
<d>-0.08545</d>
<d>-0.09155</d>
<d>-0.08545</d>
<d>-0.08545</d>
<d>-0.08545</d>
<d>-0.09155</d>
<d>-0.09766</d>
<d>-0.08545</d>
<d>-0.08545</d>
<d>-0.09155</d>
<d>-0.09155</d>
<d>-0.10376</d>
<d>-0.09766</d>
<d>-0.09766</d>
<d>-0.09766</d>
<d>-0.09155</d>
<d>-0.09155</d>
<d>-0.07935</d>
<d>-0.07935</d>
<d>-0.07324</d>
<d>-0.06714</d>
<d>-0.07935</d>
<d>-0.07324</d>
<d>-0.07324</d>
<d>-0.07324</d>
<d>-0.07324</d>
<d>-0.08545</d>
<d>-0.08545</d>
<d>-0.09155</d>
<d>-0.09155</d>
<d>-0.07935</d>
<d>-0.07935</d>
<d>-0.07935</d>
<d>-0.07324</d>
<d>-0.07324</d>
<d>-0.06714</d>
<d>-0.07324</d>
<d>-0.07324</d>
<d>-0.07324</d>
<d>-0.07935</d>
<d>-0.07324</d>
<d>-0.07935</d>
<d>-0.07935</d>
<d>-0.07324</d>
<d>-0.07324</d>
<d>-0.07324</d>
<d>-0.05493</d>
<d>-0.06104</d>
<d>-0.06104</d>
<d>-0.06714</d>
<d>-0.06714</d>
<d>-0.07324</d>
<d>-0.09155</d>
<d>-0.08545</d>
<d>-0.09766</d>
<d>-0.09155</d>
<d>-0.09155</d>
<d>-0.09155</d>
<d>-0.07935</d>
<d>-0.07935</d>
<d>-0.07324</d>
<d>-0.07324</d>
<d>-0.07324</d>
<d>-0.06714</d>
<d>-0.06714</d>
<d>-0.06714</d>
<d>-0.06104</d>
<d>-0.07935</d>
<d>-0.07935</d>
<d>-0.07935</d>
<d>-0.07324</d>
<d>-0.07324</d>
<d>-0.08545</d>
<d>-0.08545</d>
<d>-0.07935</d>
<d>-0.08545</d>
<d>-0.06104</d>
<d>-0.06104</d>
<d>-0.06714</d>
<d>-0.06104</d>
<d>-0.06104</d>
<d>-0.05493</d>
<d>-0.05493</d>
<d>-0.06104</d>
<d>-0.06714</d>
<d>-0.06714</d>
<d>-0.05493</d>
<d>-0.06104</d>
<d>-0.06104</d>
<d>-0.06104</d>
<d>-0.06104</d>
<d>-0.04883</d>
<d>-0.05493</d>
<d>-0.06104</d>
<d>-0.06104</d>
<d>-0.06714</d>
<d>-0.06104</d>
<d>-0.06714</d>
<d>-0.07935</d>
<d>-0.07324</d>
<d>-0.07935</d>
<d>-0.07324</d>
<d>-0.07935</d>
<d>-0.07935</d>
<d>-0.06104</d>
<d>-0.06104</d>
<d>-0.06104</d>
<d>-0.06104</d>
<d>-0.07324</d>
<d>-0.06104</d>
<d>-0.05493</d>
<d>-0.05493</d>
<d>-0.04883</d>
<d>-0.06714</d>
<d>-0.06714</d>
<d>-0.06714</d>
<d>-0.06104</d>
<d>-0.05493</d>
<d>-0.06714</d>
<d>-0.06714</d>
<d>-0.05493</d>
<d>-0.06104</d>
<d>-0.04273</d>
<d>-0.06104</d>
<d>-0.05493</d>
<d>-0.05493</d>
<d>-0.05493</d>
<d>-0.05493</d>
<d>-0.05493</d>
<d>-0.05493</d>
<d>-0.05493</d>
<d>-0.05493</d>
<d>-0.04883</d>
<d>-0.05493</d>
<d>-0.06104</d>
<d>-0.06104</d>
<d>-0.05493</d>
<d>-0.04273</d>
<d>-0.04273</d>
<d>-0.04273</d>
<d>-0.03662</d>
<d>-0.04883</d>
<d>-0.04883</d>
<d>-0.05493</d>
<d>-0.06714</d>
<d>-0.06104</d>
<d>-0.06714</d>
<d>-0.04273</d>
<d>-0.04883</d>
<d>-0.04273</d>
<d>-0.03662</d>
<d>-0.03052</d>
<d>-0.04273</d>
<d>-0.05493</d>
<d>-0.06104</d>
<d>-0.04273</d>
<d>-0.03662</d>
<d>-0.03662</d>
<d>-0.03662</d>
<d>-0.04273</d>
<d>-0.01831</d>
<d>-0.03052</d>
<d>-0.03662</d>
<d>-0.03662</d>
<d>-0.04883</d>
<d>-0.05493</d>
<d>-0.05493</d>
<d>-0.06714</d>
<d>-0.05493</d>
<d>-0.06104</d>
<d>-0.05493</d>
<d>-0.03662</d>
<d>-0.05493</d>
<d>-0.04273</d>
<d>-0.05493</d>
<d>-0.06104</d>
<d>-0.06714</d>
<d>-0.07324</d>
<d>-0.05493</d>
<d>-0.05493</d>
<d>-0.05493</d>
<d>-0.05493</d>
<d>-0.06714</d>
<d>-0.05493</d>
<d>-0.04273</d>
<d>-0.04883</d>
<d>-0.04883</d>
<d>-0.04883</d>
<d>-0.04883</d>
<d>-0.04883</d>
<d>-0.04273</d>
<d>-0.04273</d>
<d>-0.04273</d>
<d>-0.03662</d>
<d>-0.03662</d>
<d>-0.04883</d>
<d>-0.04273</d>
<d>-0.05493</d>
<d>-0.04883</d>
<d>-0.04883</d>
<d>-0.06714</d>
<d>-0.04883</d>
<d>-0.06104</d>
<d>-0.04273</d>
<d>-0.04273</d>
<d>-0.04273</d>
<d>-0.03662</d>
<d>-0.04273</d>
<d>-0.04883</d>
<d>-0.04883</d>
<d>-0.05493</d>
<d>-0.04883</d>
<d>-0.04273</d>
<d>-0.04273</d>
<d>-0.04273</d>
<d>-0.05493</d>
<d>-0.04883</d>
<d>-0.04883</d>
<d>-0.04273</d>
<d>-0.03662</d>
<d>-0.03662</d>
<d>-0.03052</d>
<d>-0.03662</d>
<d>-0.04883</d>
<d>-0.03662</d>
<d>-0.03662</d>
<d>-0.03662</d>
<d>-0.03662</d>
<d>-0.03662</d>
<d>-0.03662</d>
<d>-0.03662</d>
<d>-0.04273</d>
<d>-0.03052</d>
<d>-0.03662</d>
<d>-0.03052</d>
<d>-0.04273</d>
<d>-0.04883</d>
<d>-0.04883</d>
<d>-0.05493</d>
<d>-0.04273</d>
<d>-0.03662</d>
<d>-0.04273</d>
<d>-0.03052</d>
<d>-0.02441</d>
<d>-0.02441</d>
<d>-0.01831</d>
<d>-0.03052</d>
<d>-0.02441</d>
<d>-0.03052</d>
<d>-0.02441</d>
<d>-0.02441</d>
<d>-0.02441</d>
<d>-0.01221</d>
<d>-0.01831</d>
<d>-0.02441</d>
<d>-0.02441</d>
<d>-0.03052</d>
<d>-0.03052</d>
<d>-0.03052</d>
<d>-0.02441</d>
<d>-0.01831</d>
<d>-0.01831</d>
<d>-0.01221</d>
<d>-0.01221</d>
<d>-0.01831</d>
<d>-0.03052</d>
<d>-0.04273</d>
<d>-0.04273</d>
<d>-0.03662</d>
<d>-0.04273</d>
<d>-0.03052</d>
<d>-0.03052</d>
<d>-0.03052</d>
<d>-0.03052</d>
<d>-0.02441</d>
<d>-0.01831</d>
<d>-0.01831</d>
<d>-0.01221</d>
<d>-0.02441</d>
<d>-0.02441</d>
<d>-0.01831</d>
<d>-0.02441</d>
<d>-0.02441</d>
<d>-0.02441</d>
<d>-0.02441</d>
<d>-0.02441</d>
<d>-0.01831</d>
<d>-0.02441</d>
<d>-0.02441</d>
<d>-0.02441</d>
<d>-0.01221</d>
<d>-0.01221</d>
<d>-0.01831</d>
<d>-0.01221</d>
<d>-0.03052</d>
<d>-0.03052</d>
<d>-0.02441</d>
<d>-0.03052</d>
<d>-0.01831</d>
<d>-0.01831</d>
<d>-0.01831</d>
<d>-0.02441</d>
<d>-0.03662</d>
<d>-0.03052</d>
<d>-0.03662</d>
<d>-0.02441</d>
<d>-0.01831</d>
<d>-0.03052</d>
<d>-0.03052</d>
<d>-0.03052</d>
<d>-0.03662</d>
<d>-0.02441</d>
<d>-0.02441</d>
<d>-0.01831</d>
<d>-0.02441</d>
<d>-0.03052</d>
<d>-0.03052</d>
<d>-0.03662</d>
<d>-0.03052</d>
<d>-0.03052</d>
<d>-0.03052</d>
<d>-0.02441</d>
<d>-0.02441</d>
<d>-0.01221</d>
<d>-0.01831</d>
<d>-0.02441</d>
<d>-0.01221</d>
<d>-0.01831</d>
<d>-0.01831</d>
<d>-0.01831</d>
<d>-0.02441</d>
<d>-0.01831</d>
<d>-0.01221</d>
<d>-0.01221</d>
<d>-0.01221</d>
<d>-0.01831</d>
<d>-0.01831</d>
<d>-0.01221</d>
<d>-0.01221</d>
<d>-0.01221</d>
<d>-0.01831</d>
<d>-0.01831</d>
<d>-0.01831</d>
<d>-0.02441</d>
<d>-0.01831</d>
<d>-0.01831</d>
<d>-0.01221</d>
<d>-0.0061</d>
<d>-0.01221</d>
<d>-0.01831</d>
<d>-0.03052</d>
<d>-0.02441</d>
<d>-0.02441</d>
<d>-0.02441</d>
<d>-0.01831</d>
<d>-0.02441</d>
<d>-0.02441</d>
<d>-0.02441</d>
<d>-0.03052</d>
<d>-0.03052</d>
<d>-0.03052</d>
<d>-0.03662</d>
<d>-0.03052</d>
<d>-0.03662</d>
<d>-0.03662</d>
<d>-0.04273</d>
<d>-0.03662</d>
<d>-0.02441</d>
<d>-0.03052</d>
<d>-0.02441</d>
<d>-0.03052</d>
<d>-0.03662</d>
<d>-0.02441</d>
<d>-0.03052</d>
<d>-0.01831</d>
<d>-0.02441</d>
<d>-0.01831</d>
<d>-0.01831</d>
<d>-0.01831</d>
<d>-0.03052</d>
<d>-0.02441</d>
<d>-0.02441</d>
<d>-0.01831</d>
<d>-0.01831</d>
<d>-0.01831</d>
<d>-0.01831</d>
<d>-0.02441</d>
<d>-0.02441</d>
<d>-0.02441</d>
<d>-0.02441</d>
<d>-0.02441</d>
<d>-0.03052</d>
<d>-0.03052</d>
<d>-0.01831</d>
<d>-0.02441</d>
<d>-0.01221</d>
<d>-0.01831</d>
<d>-0.01221</d>
<d>-0.01221</d>
<d>-0.01831</d>
<d>-0.01221</d>
<d>-0.01831</d>
<d>-0.01831</d>
<d>-0.01831</d>
<d>-0.01831</d>
<d>-0.01831</d>
<d>-0.03052</d>
<d>-0.03052</d>
<d>-0.02441</d>
<d>-0.03662</d>
<d>-0.02441</d>
<d>-0.03052</d>
<d>-0.03662</d>
<d>-0.02441</d>
<d>-0.03662</d>
<d>-0.01831</d>
<d>-0.02441</d>
<d>-0.03052</d>
<d>-0.01831</d>
<d>-0.01831</d>
<d>-0.01221</d>
<d>-0.01221</d>
<d>-0.01221</d>
<d>-0.0061</d>
<d>-0.01221</d>
<d>-0.01221</d>
<d>-0.01221</d>
<d>-0.01221</d>
<d>-0.01221</d>
<d>-0.01221</d>
<d>-0.01831</d>
<d>-0.01221</d>
<d>-0.01221</d>
<d>-2.3e-007</d>
<d>-2.3e-007</d>
<d>-0.0061</d>
<d>-0.0061</d>
<d>-0.01221</d>
<d>-0.01221</d>
<d>-0.01221</d>
<d>-0.01221</d>
<d>-0.01831</d>
<d>-0.01831</d>
<d>-0.01221</d>
<d>-0.01221</d>
<d>-0.01221</d>
<d>-0.01221</d>
<d>-0.01831</d>
<d>-0.01221</d>
<d>-0.01221</d>
<d>-0.01221</d>
<d>-0.0061</d>
<d>-0.01221</d>
<d>-0.01221</d>
<d>-0.01221</d>
<d>-0.01221</d>
<d>-0.01221</d>
<d>-0.01221</d>
<d>-0.02441</d>
<d>-0.01831</d>
<d>-0.02441</d>
<d>-0.01221</d>
<d>-0.01221</d>
<d>-0.01221</d>
<d>-0.0061</d>
<d>-0.01831</d>
<d>-0.02441</d>
<d>-0.02441</d>
<d>-0.04273</d>
<d>-0.03052</d>
<d>-0.03052</d>
<d>-0.02441</d>
<d>-0.01831</d>
<d>-0.01831</d>
<d>-0.01221</d>
<d>-0.01831</d>
<d>-0.01831</d>
<d>-0.02441</d>
<d>-0.02441</d>
<d>-0.01831</d>
<d>-0.01221</d>
<d>-0.01831</d>
<d>-0.01221</d>
<d>-0.01221</d>
<d>-0.01221</d>
<d>-0.01221</d>
<d>-0.01221</d>
<d>-0.01221</d>
<d>-0.01831</d>
<d>-0.01221</d>
<d>-0.01221</d>
<d>-0.01221</d>
<d>-2.3e-007</d>
<d>-0.01221</d>
<d>-0.01221</d>
<d>-0.01221</d>
<d>-0.02441</d>
<d>-0.01221</d>
<d>-0.02441</d>
<d>-0.02441</d>
<d>-0.01831</d>
<d>-0.01221</d>
<d>-0.01221</d>
<d>-0.01221</d>
<d>-0.01221</d>
<d>-0.0061</d>
<d>-0.01221</d>
<d>-0.01221</d>
<d>-0.01221</d>
<d>-0.01831</d>
<d>-0.01221</d>
<d>-0.02441</d>
<d>-0.01221</d>
<d>-0.01221</d>
<d>-0.0061</d>
<d>-0.01221</d>
<d>-0.01221</d>
<d>-0.01221</d>
<d>-0.01221</d>
<d>-0.01221</d>
<d>-0.01221</d>
<d>-0.01831</d>
<d>-0.01831</d>
<d>-0.01221</d>
<d>-0.02441</d>
<d>-0.01221</d>
<d>-0.01221</d>
<d>-0.01221</d>
<d>-0.01831</d>
<d>-0.01831</d>
<d>-0.01221</d>
<d>-0.01221</d>
<d>-0.01221</d>
<d>-0.01221</d>
<d>-0.01831</d>
<d>-0.01221</d>
<d>-0.01221</d>
<d>-0.0061</d>
<d>0.006104</d>
<d>-0.0061</d>
<d>-0.0061</d>
<d>-0.01221</d>
<d>-0.01221</d>
<d>-0.01221</d>
<d>-0.01221</d>
<d>-0.01221</d>
<d>-0.01221</d>
<d>-0.01831</d>
<d>-0.01221</d>
<d>-0.01221</d>
<d>-0.01221</d>
<d>-0.01221</d>
<d>-0.01221</d>
<d>-0.0061</d>
<d>-0.0061</d>
<d>-0.01221</d>
<d>-0.01221</d>
<d>-0.01221</d>
<d>-0.01221</d>
<d>-0.01831</d>
<d>-0.01221</d>
<d>-0.01221</d>
<d>-0.01221</d>
<d>-0.01221</d>
<d>-0.0061</d>
<d>-0.0061</d>
<d>-2.3e-007</d>
<d>-0.01221</d>
<d>-0.01221</d>
<d>-0.01221</d>
<d>-0.01221</d>
<d>-0.01221</d>
<d>-0.01221</d>
<d>-0.01221</d>
<d>-0.01221</d>
<d>-0.01221</d>
<d>-0.0061</d>
<d>-0.01221</d>
<d>-2.3e-007</d>
<d>-0.0061</d>
<d>-0.01221</d>
<d>-0.0061</d>
<d>-2.3e-007</d>
<d>-0.0061</d>
<d>-0.0061</d>
<d>-0.01221</d>
<d>-0.0061</d>
<d>-0.0061</d>
<d>-0.01221</d>
<d>-0.0061</d>
<d>-0.01221</d>
<d>-0.01221</d>
<d>-0.01221</d>
<d>-0.01831</d>
<d>-0.01221</d>
<d>-0.01831</d>
<d>-0.01221</d>
<d>-0.0061</d>
<d>-0.01221</d>
<d>-0.0061</d>
<d>-0.0061</d>
<d>-0.0061</d>
<d>-0.01221</d>
<d>-0.01221</d>
<d>-0.01221</d>
<d>-0.0061</d>
<d>-0.0061</d>
<d>-0.0061</d>
<d>-0.01221</d>
<d>-0.01221</d>
<d>-0.01221</d>
<d>-0.0061</d>
<d>-0.01221</d>
<d>-0.01221</d>
<d>-0.0061</d>
<d>-0.01221</d>
<d>-0.01221</d>
<d>-0.01221</d>
<d>-0.01831</d>
<d>-0.01831</d>
<d>-0.01221</d>
<d>-0.01221</d>
<d>-0.0061</d>
<d>-0.01221</d>
<d>-0.0061</d>
<d>-0.01221</d>
<d>-0.01221</d>
<d>-2.3e-007</d>
<d>-2.3e-007</d>
<d>-0.01221</d>
<d>-0.01221</d>
<d>-0.01221</d>
<d>-0.01221</d>
<d>-0.01221</d>
<d>-0.0061</d>
<d>-0.0061</d>
<d>-0.01221</d>
<d>-2.3e-007</d>
<d>-2.3e-007</d>
<d>-2.3e-007</d>
<d>0.006104</d>
<d>-0.0061</d>
<d>-2.3e-007</d>
<d>-0.0061</d>
<d>-0.01221</d>
<d>-2.3e-007</d>
<d>-0.0061</d>
<d>-0.0061</d>
<d>-0.0061</d>
<d>-0.01221</d>
<d>-0.01221</d>
<d>-0.01221</d>
<d>-0.0061</d>
<d>-2.3e-007</d>
<d>-0.0061</d>
<d>-2.3e-007</d>
<d>-2.3e-007</d>
<d>-0.0061</d>
<d>-2.3e-007</d>
<d>-0.0061</d>
<d>0.006104</d>
<d>-2.3e-007</d>
<d>-2.3e-007</d>
<d>-2.3e-007</d>
<d>-2.3e-007</d>
<d>0.006104</d>
<d>0.006104</d>
<d>-2.3e-007</d>
<d>-0.0061</d>
<d>-0.01221</d>
<d>-0.0061</d>
<d>-0.0061</d>
<d>-0.0061</d>
<d>-2.3e-007</d>
<d>-0.01221</d>
<d>-0.0061</d>
<d>-0.0061</d>
<d>-0.01221</d>
<d>-2.3e-007</d>
<d>-2.3e-007</d>
<d>-0.01221</d>
<d>-0.01221</d>
<d>-0.01831</d>
<d>-0.01221</d>
<d>-0.01221</d>
<d>-0.01221</d>
<d>-2.3e-007</d>
<d>-2.3e-007</d>
<d>-0.0061</d>
<d>-0.0061</d>
<d>-0.01221</d>
<d>-0.01221</d>
<d>-0.01221</d>
<d>-0.0061</d>
<d>-0.0061</d>
<d>-0.0061</d>
<d>0.006104</d>
<d>-0.0061</d>
<d>-0.0061</d>
<d>-0.01221</d>
<d>-0.0061</d>
<d>-0.0061</d>
<d>-0.01221</d>
<d>-0.01221</d>
<d>-0.0061</d>
<d>-0.01221</d>
<d>-0.0061</d>
<d>-0.01221</d>
<d>-0.01221</d>
<d>-0.01221</d>
<d>-0.01221</d>
<d>-0.0061</d>
<d>-0.0061</d>
<d>-0.01221</d>
<d>-0.0061</d>
<d>-0.01221</d>
<d>-0.0061</d>
<d>-0.0061</d>
<d>-0.01221</d>
<d>-0.01221</d>
<d>-0.01221</d>
<d>-0.01221</d>
<d>-0.01831</d>
<d>-0.02441</d>
<d>-0.01221</d>
<d>-0.01221</d>
<d>-0.01221</d>
<d>-0.0061</d>
<d>-0.0061</d>
<d>-2.3e-007</d>
<d>-2.3e-007</d>
<d>-0.01221</d>
<d>-0.01221</d>
<d>-0.01831</d>
<d>-0.01221</d>
<d>-0.0061</d>
<d>-0.0061</d>
<d>-2.3e-007</d>
<d>-0.0061</d>
<d>-0.0061</d>
<d>-0.01221</d>
<d>-0.01221</d>
<d>-0.0061</d>
<d>-0.01221</d>
<d>-0.0061</d>
<d>-0.0061</d>
<d>-0.0061</d>
<d>-0.0061</d>
<d>-0.01221</d>
<d>-0.01221</d>
<d>-0.01221</d>
<d>-0.01221</d>
<d>-0.0061</d>
</Subcolumn>
</YColumn>
<YColumn Width="103" Decimals="6" Subcolumns="1">
<Title>12</Title>
<Subcolumn>
<d>-0.006832</d>
<d>-0.006832</d>
<d>-0.006832</d>
<d>-0.000729</d>
<d>-0.006832</d>
<d>-0.000729</d>
<d>-0.006832</d>
<d>-0.019039</d>
<d>-0.006832</d>
<d>-0.006832</d>
<d>-0.006832</d>
<d>-0.006832</d>
<d>-0.012936</d>
<d>-0.012936</d>
<d>0.005375</d>
<d>0.005375</d>
<d>0.005375</d>
<d>-0.000729</d>
<d>-0.019039</d>
<d>-0.043453</d>
<d>-0.043453</d>
<d>-0.03735</d>
<d>-0.025143</d>
<d>-0.006832</d>
<d>0.011478</d>
<d>0.005375</d>
<d>-0.000729</d>
<d>-0.012936</d>
<d>-0.006832</d>
<d>-0.000729</d>
<d>0.011478</d>
<d>0.011478</d>
<d>0.005375</d>
<d>0.011478</d>
<d>-0.000729</d>
<d>0.005375</d>
<d>-0.000729</d>
<d>-0.006832</d>
<d>0.005375</d>
<d>-0.006832</d>
<d>-0.019039</d>
<d>-0.012936</d>
<d>-0.012936</d>
<d>-0.019039</d>
<d>-0.006832</d>
<d>-0.000729</d>
<d>0.005375</d>
<d>0.023685</d>
<d>0.005375</d>
<d>0.005375</d>
<d>0.005375</d>
<d>-0.000729</d>
<d>-0.000729</d>
<d>0.011478</d>
<d>-0.006832</d>
<d>-0.000729</d>
<d>-0.000729</d>
<d>0.011478</d>
<d>0.017582</d>
<d>0.005375</d>
<d>-0.006832</d>
<d>-0.000729</d>
<d>-0.006832</d>
<d>-0.000729</d>
<d>-0.000729</d>
<d>-0.000729</d>
<d>-0.019039</d>
<d>-0.006832</d>
<d>-0.006832</d>
<d>-0.012936</d>
<d>-0.000729</d>
<d>-0.006832</d>
<d>-0.012936</d>
<d>-0.006832</d>
<d>-0.000729</d>
<d>0.017582</d>
<d>0.017582</d>
<d>0.011478</d>
<d>0.011478</d>
<d>-0.012936</d>
<d>-0.006832</d>
<d>-0.006832</d>
<d>-0.006832</d>
<d>-0.006832</d>
<d>-0.000729</d>
<d>-0.006832</d>
<d>0.005375</d>
<d>0.011478</d>
<d>0.005375</d>
<d>0.011478</d>
<d>0.011478</d>
<d>0.011478</d>
<d>0.017582</d>
<d>0.017582</d>
<d>0.017582</d>
<d>0.017582</d>
<d>0.011478</d>
<d>0.005375</d>
<d>0.011478</d>
<d>0.011478</d>
<d>0.011478</d>
<d>-0.006832</d>
<d>-0.006832</d>
<d>-0.019039</d>
<d>-0.012936</d>
<d>-0.012936</d>
<d>-0.006832</d>
<d>-0.012936</d>
<d>-0.000729</d>
<d>0.011478</d>
<d>0.005375</d>
<d>-0.006832</d>
<d>0.005375</d>
<d>0.005375</d>
<d>0.005375</d>
<d>-0.000729</d>
<d>-0.000729</d>
<d>-0.000729</d>
<d>-0.000729</d>
<d>-0.006832</d>
<d>-0.000729</d>
<d>-0.006832</d>
<d>-0.000729</d>
<d>-0.012936</d>
<d>-0.006832</d>
<d>-0.006832</d>
<d>-0.019039</d>
<d>-0.012936</d>
<d>0.011478</d>
<d>-0.000729</d>
<d>0.005375</d>
<d>0.005375</d>
<d>0.011478</d>
<d>0.017582</d>
<d>0.011478</d>
<d>-0.000729</d>
<d>-0.000729</d>
<d>-0.006832</d>
<d>-0.006832</d>
<d>-0.012936</d>
<d>0.011478</d>
<d>0.023685</d>
<d>0.011478</d>
<d>-0.006832</d>
<d>-0.006832</d>
<d>-0.012936</d>
<d>-0.006832</d>
<d>-0.006832</d>
<d>0.005375</d>
<d>-0.000729</d>
<d>-0.006832</d>
<d>-0.000729</d>
<d>-0.019039</d>
<d>-0.012936</d>
<d>-0.000729</d>
<d>0.005375</d>
<d>0.005375</d>
<d>0.011478</d>
<d>0.005375</d>
<d>0.005375</d>
<d>-0.000729</d>
<d>0.005375</d>
<d>-0.012936</d>
<d>-0.000729</d>
<d>-0.000729</d>
<d>0.011478</d>
<d>0.017582</d>
<d>0.023685</d>
<d>0.011478</d>
<d>0.005375</d>
<d>-0.006832</d>
<d>-0.006832</d>
<d>-0.000729</d>
<d>-0.000729</d>
<d>-0.000729</d>
<d>-0.000729</d>
<d>-0.006832</d>
<d>-0.006832</d>
<d>-0.006832</d>
<d>-0.012936</d>
<d>-0.019039</d>
<d>-0.012936</d>
<d>-0.006832</d>
<d>-0.000729</d>
<d>-0.000729</d>
<d>0.005375</d>
<d>0.005375</d>
<d>0.011478</d>
<d>0.005375</d>
<d>-0.012936</d>
<d>-0.000729</d>
<d>0.005375</d>
<d>0.005375</d>
<d>-0.006832</d>
<d>0.005375</d>
<d>0.011478</d>
<d>0.017582</d>
<d>-0.000729</d>
<d>-0.012936</d>
<d>-0.006832</d>
<d>-0.006832</d>
<d>-0.000729</d>
<d>0.011478</d>
<d>0.011478</d>
<d>0.011478</d>
<d>-0.000729</d>
<d>0.005375</d>
<d>0.005375</d>
<d>0.005375</d>
<d>0.023685</d>
<d>0.029789</d>
<d>0.023685</d>
<d>0.017582</d>
<d>-0.000729</d>
<d>-0.006832</d>
<d>-0.012936</d>
<d>-0.006832</d>
<d>-0.019039</d>
<d>-0.025143</d>
<d>-0.006832</d>
<d>-0.012936</d>
<d>-0.019039</d>
<d>-0.012936</d>
<d>-0.006832</d>
<d>0.005375</d>
<d>0.011478</d>
<d>0.011478</d>
<d>0.023685</d>
<d>0.017582</d>
<d>0.005375</d>
<d>0.017582</d>
<d>0.023685</d>
<d>0.011478</d>
<d>0.011478</d>
<d>0.017582</d>
<d>0.011478</d>
<d>0.005375</d>
<d>0.011478</d>
<d>0.017582</d>
<d>0.011478</d>
<d>0.005375</d>
<d>0.005375</d>
<d>0.005375</d>
<d>-0.006832</d>
<d>-0.012936</d>
<d>0.005375</d>
<d>-0.000729</d>
<d>-0.006832</d>
<d>-0.000729</d>
<d>-0.006832</d>
<d>-0.000729</d>
<d>-0.000729</d>
<d>0.011478</d>
<d>0.011478</d>
<d>0.011478</d>
<d>0.005375</d>
<d>0.011478</d>
<d>0.005375</d>
<d>-0.006832</d>
<d>0.011478</d>
<d>0.017582</d>
<d>0.023685</d>
<d>0.023685</d>
<d>0.011478</d>
<d>0.017582</d>
<d>0.023685</d>
<d>0.011478</d>
<d>0.011478</d>
<d>0.005375</d>
<d>-0.000729</d>
<d>0.005375</d>
<d>-0.006832</d>
<d>-0.006832</d>
<d>0.011478</d>
<d>-0.006832</d>
<d>-0.000729</d>
<d>0.011478</d>
<d>0.011478</d>
<d>0.023685</d>
<d>0.017582</d>
<d>0.005375</d>
<d>-0.019039</d>
<d>-0.000729</d>
<d>-0.000729</d>
<d>-0.000729</d>
<d>-0.000729</d>
<d>-0.000729</d>
<d>-0.000729</d>
<d>-0.000729</d>
<d>-0.006832</d>
<d>-0.000729</d>
<d>-0.000729</d>
<d>-0.006832</d>
<d>0.005375</d>
<d>0.005375</d>
<d>0.005375</d>
<d>0.011478</d>
<d>0.005375</d>
<d>-0.000729</d>
<d>-0.006832</d>
<d>0.005375</d>
<d>0.011478</d>
<d>0.011478</d>
<d>0.005375</d>
<d>0.011478</d>
<d>0.023685</d>
<d>0.023685</d>
<d>0.017582</d>
<d>0.017582</d>
<d>0.011478</d>
<d>0.011478</d>
<d>0.005375</d>
<d>-0.006832</d>
<d>-0.019039</d>
<d>-0.012936</d>
<d>-0.006832</d>
<d>0.011478</d>
<d>0.005375</d>
<d>0.011478</d>
<d>0.017582</d>
<d>-0.000729</d>
<d>-0.000729</d>
<d>0.005375</d>
<d>-0.000729</d>
<d>-0.006832</d>
<d>0.005375</d>
<d>-0.000729</d>
<d>-0.006832</d>
<d>-0.019039</d>
<d>-0.012936</d>
<d>-0.000729</d>
<d>-0.006832</d>
<d>-0.006832</d>
<d>0.011478</d>
<d>0.005375</d>
<d>-0.000729</d>
<d>0.005375</d>
<d>-0.012936</d>
<d>-0.006832</d>
<d>-0.006832</d>
<d>-0.006832</d>
<d>-0.012936</d>
<d>-0.012936</d>
<d>-0.006832</d>
<d>-0.012936</d>
<d>-0.006832</d>
<d>0.011478</d>
<d>0.005375</d>
<d>0.005375</d>
<d>0.005375</d>
<d>-0.000729</d>
<d>-0.012936</d>
<d>-0.019039</d>
<d>-0.012936</d>
<d>-0.019039</d>
<d>-0.031246</d>
<d>-0.025143</d>
<d>-0.019039</d>
<d>-0.012936</d>
<d>-0.000729</d>
<d>-0.006832</d>
<d>-0.006832</d>
<d>-0.019039</d>
<d>-0.025143</d>
<d>-0.019039</d>
<d>-0.006832</d>
<d>-0.012936</d>
<d>-0.000729</d>
<d>-0.000729</d>
<d>-0.000729</d>
<d>-0.006832</d>
<d>-0.006832</d>
<d>0.005375</d>
<d>0.005375</d>
<d>0.011478</d>
<d>-0.006832</d>
<d>0.005375</d>
<d>-0.000729</d>
<d>-0.012936</d>
<d>-0.012936</d>
<d>-0.000729</d>
<d>-0.000729</d>
<d>-0.006832</d>
<d>-0.000729</d>
<d>-0.012936</d>
<d>-0.012936</d>
<d>-0.006832</d>
<d>-0.000729</d>
<d>0.011478</d>
<d>0.005375</d>
<d>-0.000729</d>
<d>-0.000729</d>
<d>-0.012936</d>
<d>-0.012936</d>
<d>0.011478</d>
<d>0.011478</d>
<d>0.011478</d>
<d>0.005375</d>
<d>0.005375</d>
<d>-0.000729</d>
<d>0.011478</d>
<d>-0.373043</d>
<d>-0.879635</d>
<d>-0.476803</d>
<d>0.084721</d>
<d>0.017582</d>
<d>-0.025143</d>
<d>0.011478</d>
<d>0.041996</d>
<d>0.054203</d>
<d>0.054203</d>
<d>0.072514</d>
<d>0.06641</d>
<d>0.054203</d>
<d>0.0481</d>
<d>0.060307</d>
<d>0.041996</d>
<d>0.035892</d>
<d>0.035892</d>
<d>0.041996</d>
<d>0.035892</d>
<d>0.023685</d>
<d>0.011478</d>
<d>0.023685</d>
<d>0.029789</d>
<d>0.017582</d>
<d>0.035892</d>
<d>0.035892</d>
<d>0.029789</d>
<d>0.017582</d>
<d>0.017582</d>
<d>0.023685</d>
<d>0.017582</d>
<d>0.017582</d>
<d>-0.000729</d>
<d>-0.012936</d>
<d>-0.012936</d>
<d>-0.012936</d>
<d>-0.000729</d>
<d>0.005375</d>
<d>0.011478</d>
<d>0.017582</d>
<d>-0.000729</d>
<d>-0.006832</d>
<d>-0.006832</d>
<d>0.005375</d>
<d>0.011478</d>
<d>0.005375</d>
<d>-0.000729</d>
<d>-0.012936</d>
<d>-0.019039</d>
<d>-0.012936</d>
<d>0.005375</d>
<d>0.023685</d>
<d>0.035892</d>
<d>-0.006832</d>
<d>-0.086178</d>
<d>-0.122799</d>
<d>-0.092281</d>
<d>-0.073971</d>
<d>-0.061764</d>
<d>-0.049557</d>
<d>-0.043453</d>
<d>-0.031246</d>
<d>-0.031246</d>
<d>-0.03735</d>
<d>-0.043453</d>
<d>-0.03735</d>
<d>-0.031246</d>
<d>-0.031246</d>
<d>-0.031246</d>
<d>-0.031246</d>
<d>-0.031246</d>
<d>-0.031246</d>
<d>-0.031246</d>
<d>-0.031246</d>
<d>-0.043453</d>
<d>-0.043453</d>
<d>-0.061764</d>
<d>-0.067867</d>
<d>-0.061764</d>
<d>-0.061764</d>
<d>-0.067867</d>
<d>-0.067867</d>
<d>-0.073971</d>
<d>-0.092281</d>
<d>-0.098385</d>
<d>-0.092281</d>
<d>-0.116695</d>
<d>-0.116695</d>
<d>-0.110592</d>
<d>-0.116695</d>
<d>-0.116695</d>
<d>-0.104488</d>
<d>-0.104488</d>
<d>-0.116695</d>
<d>-0.116695</d>
<d>-0.128902</d>
<d>-0.110592</d>
<d>-0.104488</d>
<d>-0.110592</d>
<d>-0.122799</d>
<d>-0.122799</d>
<d>-0.122799</d>
<d>-0.122799</d>
<d>-0.122799</d>
<d>-0.122799</d>
<d>-0.128902</d>
<d>-0.135006</d>
<d>-0.128902</d>
<d>-0.128902</d>
<d>-0.128902</d>
<d>-0.135006</d>
<d>-0.135006</d>
<d>-0.141109</d>
<d>-0.141109</d>
<d>-0.122799</d>
<d>-0.141109</d>
<d>-0.147213</d>
<d>-0.135006</d>
<d>-0.153316</d>
<d>-0.153316</d>
<d>-0.15942</d>
<d>-0.171627</d>
<d>-0.15942</d>
<d>-0.135006</d>
<d>-0.135006</d>
<d>-0.128902</d>
<d>-0.135006</d>
<d>-0.141109</d>
<d>-0.135006</d>
<d>-0.141109</d>
<d>-0.141109</d>
<d>-0.147213</d>
<d>-0.147213</d>
<d>-0.135006</d>
<d>-0.141109</d>
<d>-0.147213</d>
<d>-0.147213</d>
<d>-0.141109</d>
<d>-0.135006</d>
<d>-0.122799</d>
<d>-0.122799</d>
<d>-0.122799</d>
<d>-0.135006</d>
<d>-0.141109</d>
<d>-0.147213</d>
<d>-0.122799</d>
<d>-0.116695</d>
<d>-0.128902</d>
<d>-0.135006</d>
<d>-0.128902</d>
<d>-0.128902</d>
<d>-0.128902</d>
<d>-0.128902</d>
<d>-0.128902</d>
<d>-0.128902</d>
<d>-0.116695</d>
<d>-0.122799</d>
<d>-0.122799</d>
<d>-0.135006</d>
<d>-0.141109</d>
<d>-0.147213</d>
<d>-0.128902</d>
<d>-0.135006</d>
<d>-0.135006</d>
<d>-0.122799</d>
<d>-0.116695</d>
<d>-0.116695</d>
<d>-0.116695</d>
<d>-0.110592</d>
<d>-0.092281</d>
<d>-0.092281</d>
<d>-0.092281</d>
<d>-0.098385</d>
<d>-0.110592</d>
<d>-0.110592</d>
<d>-0.104488</d>
<d>-0.116695</d>
<d>-0.086178</d>
<d>-0.098385</d>
<d>-0.092281</d>
<d>-0.080074</d>
<d>-0.104488</d>
<d>-0.122799</d>
<d>-0.104488</d>
<d>-0.110592</d>
<d>-0.098385</d>
<d>-0.092281</d>
<d>-0.086178</d>
<d>-0.086178</d>
<d>-0.092281</d>
<d>-0.092281</d>
<d>-0.098385</d>
<d>-0.110592</d>
<d>-0.116695</d>
<d>-0.116695</d>
<d>-0.104488</d>
<d>-0.104488</d>
<d>-0.098385</d>
<d>-0.086178</d>
<d>-0.098385</d>
<d>-0.086178</d>
<d>-0.080074</d>
<d>-0.080074</d>
<d>-0.086178</d>
<d>-0.086178</d>
<d>-0.086178</d>
<d>-0.073971</d>
<d>-0.073971</d>
<d>-0.080074</d>
<d>-0.073971</d>
<d>-0.080074</d>
<d>-0.067867</d>
<d>-0.061764</d>
<d>-0.067867</d>
<d>-0.073971</d>
<d>-0.080074</d>
<d>-0.073971</d>
<d>-0.080074</d>
<d>-0.073971</d>
<d>-0.067867</d>
<d>-0.086178</d>
<d>-0.086178</d>
<d>-0.092281</d>
<d>-0.098385</d>
<d>-0.092281</d>
<d>-0.086178</d>
<d>-0.067867</d>
<d>-0.061764</d>
<d>-0.061764</d>
<d>-0.067867</d>
<d>-0.067867</d>
<d>-0.049557</d>
<d>-0.061764</d>
<d>-0.05566</d>
<d>-0.049557</d>
<d>-0.05566</d>
<d>-0.05566</d>
<d>-0.061764</d>
<d>-0.067867</d>
<d>-0.067867</d>
<d>-0.067867</d>
<d>-0.061764</d>
<d>-0.049557</d>
<d>-0.049557</d>
<d>-0.043453</d>
<d>-0.049557</d>
<d>-0.061764</d>
<d>-0.05566</d>
<d>-0.067867</d>
<d>-0.067867</d>
<d>-0.05566</d>
<d>-0.067867</d>
<d>-0.05566</d>
<d>-0.061764</d>
<d>-0.067867</d>
<d>-0.049557</d>
<d>-0.05566</d>
<d>-0.05566</d>
<d>-0.043453</d>
<d>-0.043453</d>
<d>-0.049557</d>
<d>-0.049557</d>
<d>-0.043453</d>
<d>-0.05566</d>
<d>-0.05566</d>
<d>-0.05566</d>
<d>-0.067867</d>
<d>-0.073971</d>
<d>-0.073971</d>
<d>-0.049557</d>
<d>-0.03735</d>
<d>-0.03735</d>
<d>-0.03735</d>
<d>-0.043453</d>
<d>-0.043453</d>
<d>-0.043453</d>
<d>-0.049557</d>
<d>-0.05566</d>
<d>-0.049557</d>
<d>-0.03735</d>
<d>-0.043453</d>
<d>-0.043453</d>
<d>-0.03735</d>
<d>-0.031246</d>
<d>-0.03735</d>
<d>-0.031246</d>
<d>-0.031246</d>
<d>-0.025143</d>
<d>-0.025143</d>
<d>-0.03735</d>
<d>-0.043453</d>
<d>-0.019039</d>
<d>-0.019039</d>
<d>-0.012936</d>
<d>-0.012936</d>
<d>-0.012936</d>
<d>-0.012936</d>
<d>-0.025143</d>
<d>-0.031246</d>
<d>-0.019039</d>
<d>-0.025143</d>
<d>-0.031246</d>
<d>-0.031246</d>
<d>-0.031246</d>
<d>-0.031246</d>
<d>-0.025143</d>
<d>-0.025143</d>
<d>-0.019039</d>
<d>-0.031246</d>
<d>-0.019039</d>
<d>-0.025143</d>
<d>-0.025143</d>
<d>-0.019039</d>
<d>-0.006832</d>
<d>-0.006832</d>
<d>-0.019039</d>
<d>-0.03735</d>
<d>-0.043453</d>
<d>-0.043453</d>
<d>-0.031246</d>
<d>-0.019039</d>
<d>-0.006832</d>
<d>-0.000729</d>
<d>-0.025143</d>
<d>-0.031246</d>
<d>-0.043453</d>
<d>-0.049557</d>
<d>-0.03735</d>
<d>-0.061764</d>
<d>-0.043453</d>
<d>-0.043453</d>
<d>-0.043453</d>
<d>-0.043453</d>
<d>-0.03735</d>
<d>-0.03735</d>
<d>-0.031246</d>
<d>-0.03735</d>
<d>-0.025143</d>
<d>-0.03735</d>
<d>-0.025143</d>
<d>-0.019039</d>
<d>-0.031246</d>
<d>-0.025143</d>
<d>-0.019039</d>
<d>-0.025143</d>
<d>-0.019039</d>
<d>-0.012936</d>
<d>-0.019039</d>
<d>-0.000729</d>
<d>-0.012936</d>
<d>-0.025143</d>
<d>-0.031246</d>
<d>-0.03735</d>
<d>-0.043453</d>
<d>-0.025143</d>
<d>-0.031246</d>
<d>-0.031246</d>
<d>-0.019039</d>
<d>-0.025143</d>
<d>-0.019039</d>
<d>-0.025143</d>
<d>-0.012936</d>
<d>-0.006832</d>
<d>-0.019039</d>
<d>-0.019039</d>
<d>-0.031246</d>
<d>-0.019039</d>
<d>-0.012936</d>
<d>-0.000729</d>
<d>0.011478</d>
<d>-0.000729</d>
<d>-0.019039</d>
<d>-0.031246</d>
<d>-0.031246</d>
<d>-0.03735</d>
<d>-0.025143</d>
<d>-0.025143</d>
<d>-0.031246</d>
<d>-0.03735</d>
<d>-0.031246</d>
<d>-0.025143</d>
<d>-0.000729</d>
<d>0.005375</d>
<d>0.011478</d>
<d>0.017582</d>
<d>0.005375</d>
<d>0.005375</d>
<d>-0.025143</d>
<d>-0.031246</d>
<d>-0.025143</d>
<d>-0.012936</d>
<d>-0.019039</d>
<d>-0.019039</d>
<d>-0.019039</d>
<d>-0.012936</d>
<d>-0.012936</d>
<d>-0.012936</d>
<d>-0.025143</d>
<d>-0.019039</d>
<d>-0.025143</d>
<d>-0.025143</d>
<d>-0.025143</d>
<d>-0.025143</d>
<d>-0.019039</d>
<d>-0.025143</d>
<d>-0.012936</d>
<d>-0.019039</d>
<d>-0.012936</d>
<d>-0.000729</d>
<d>-0.006832</d>
<d>-0.012936</d>
<d>-0.019039</d>
<d>-0.025143</d>
<d>-0.012936</d>
<d>-0.006832</d>
<d>-0.019039</d>
<d>-0.012936</d>
<d>-0.012936</d>
<d>-0.006832</d>
<d>-0.019039</d>
<d>-0.019039</d>
<d>-0.025143</d>
<d>-0.019039</d>
<d>-0.012936</d>
<d>-0.012936</d>
<d>-0.006832</d>
<d>-0.025143</d>
<d>-0.019039</d>
<d>-0.019039</d>
<d>-0.006832</d>
<d>-0.000729</d>
<d>-0.006832</d>
<d>-0.012936</d>
<d>-0.012936</d>
<d>-0.006832</d>
<d>-0.000729</d>
<d>-0.000729</d>
<d>0.005375</d>
<d>-0.006832</d>
<d>-0.000729</d>
<d>0.005375</d>
<d>0.005375</d>
<d>-0.006832</d>
<d>0.005375</d>
<d>-0.000729</d>
<d>-0.006832</d>
<d>-0.006832</d>
<d>-0.012936</d>
<d>-0.000729</d>
<d>-0.006832</d>
<d>-0.025143</d>
<d>-0.019039</d>
<d>-0.019039</d>
<d>-0.025143</d>
<d>-0.019039</d>
<d>-0.019039</d>
<d>-0.031246</d>
<d>-0.019039</d>
<d>0.005375</d>
<d>0.017582</d>
<d>0.017582</d>
<d>0.017582</d>
<d>0.005375</d>
<d>-0.000729</d>
<d>0.005375</d>
<d>0.005375</d>
<d>0.017582</d>
<d>0.011478</d>
<d>-0.012936</d>
<d>-0.006832</d>
<d>0.005375</d>
<d>-0.000729</d>
<d>-0.012936</d>
<d>-0.019039</d>
<d>-0.025143</d>
<d>-0.025143</d>
<d>-0.019039</d>
<d>-0.012936</d>
<d>-0.012936</d>
<d>-0.019039</d>
<d>-0.019039</d>
<d>-0.025143</d>
<d>-0.012936</d>
<d>-0.012936</d>
<d>-0.019039</d>
<d>-0.006832</d>
<d>0.011478</d>
<d>-0.000729</d>
<d>-0.000729</d>
<d>-0.012936</d>
<d>-0.006832</d>
<d>-0.012936</d>
<d>-0.012936</d>
<d>-0.012936</d>
<d>-0.012936</d>
<d>-0.006832</d>
<d>-0.006832</d>
<d>-0.006832</d>
<d>0.005375</d>
<d>-0.000729</d>
<d>-0.000729</d>
<d>-0.012936</d>
<d>-0.000729</d>
<d>0.005375</d>
<d>-0.000729</d>
<d>-0.006832</d>
<d>-0.000729</d>
<d>0.005375</d>
<d>0.011478</d>
<d>0.005375</d>
<d>0.011478</d>
<d>0.011478</d>
<d>-0.000729</d>
<d>-0.006832</d>
<d>-0.03735</d>
<d>-0.031246</d>
<d>-0.025143</d>
<d>-0.025143</d>
<d>-0.012936</d>
<d>-0.006832</d>
<d>0.011478</d>
<d>0.017582</d>
<d>0.005375</d>
<d>0.023685</d>
<d>0.023685</d>
<d>0.011478</d>
<d>0.011478</d>
<d>-0.006832</d>
<d>-0.000729</d>
<d>0.005375</d>
<d>-0.000729</d>
<d>-0.006832</d>
<d>-0.006832</d>
<d>-0.019039</d>
<d>-0.019039</d>
<d>-0.012936</d>
<d>-0.012936</d>
<d>-0.006832</d>
<d>-0.000729</d>
<d>-0.006832</d>
<d>-0.006832</d>
<d>-0.006832</d>
<d>-0.019039</d>
<d>-0.006832</d>
<d>0.005375</d>
<d>-0.012936</d>
<d>-0.000729</d>
<d>-0.012936</d>
<d>-0.006832</d>
<d>-0.000729</d>
<d>0.005375</d>
<d>0.011478</d>
<d>0.005375</d>
<d>0.005375</d>
<d>-0.000729</d>
<d>0.017582</d>
<d>0.017582</d>
<d>0.023685</d>
<d>0.011478</d>
<d>-0.000729</d>
<d>-0.012936</d>
<d>-0.006832</d>
<d>-0.000729</d>
<d>0.011478</d>
<d>0.023685</d>
<d>0.011478</d>
<d>-0.000729</d>
<d>-0.006832</d>
<d>-0.019039</d>
<d>-0.025143</d>
<d>-0.03735</d>
<d>-0.025143</d>
<d>-0.012936</d>
<d>-0.012936</d>
<d>-0.012936</d>
<d>0.005375</d>
<d>-0.006832</d>
<d>0.017582</d>
<d>0.023685</d>
<d>0.005375</d>
<d>-0.006832</d>
<d>-0.012936</d>
<d>-0.012936</d>
<d>-0.006832</d>
<d>-0.025143</d>
<d>-0.012936</d>
<d>0.005375</d>
<d>-0.000729</d>
<d>-0.006832</d>
<d>-0.006832</d>
<d>0.005375</d>
<d>-0.000729</d>
<d>0.005375</d>
<d>0.011478</d>
<d>0.011478</d>
<d>0.005375</d>
<d>-0.006832</d>
<d>-0.012936</d>
<d>-0.000729</d>
<d>0.011478</d>
<d>0.005375</d>
<d>-0.000729</d>
<d>-0.006832</d>
<d>-0.012936</d>
<d>-0.006832</d>
<d>-0.019039</d>
<d>-0.012936</d>
<d>-0.012936</d>
<d>-0.012936</d>
<d>-0.012936</d>
<d>-0.006832</d>
<d>-0.006832</d>
<d>0.005375</d>
<d>-0.006832</d>
<d>-0.000729</d>
<d>-0.000729</d>
<d>-0.012936</d>
<d>-0.019039</d>
<d>-0.025143</d>
<d>-0.006832</d>
<d>0.005375</d>
<d>0.011478</d>
<d>0.011478</d>
<d>0.011478</d>
<d>-0.006832</d>
<d>-0.000729</d>
<d>0.011478</d>
<d>0.005375</d>
<d>0.005375</d>
<d>0.011478</d>
<d>0.005375</d>
<d>-0.000729</d>
<d>-0.000729</d>
<d>-0.019039</d>
<d>-0.025143</d>
<d>-0.012936</d>
<d>0.005375</d>
<d>-0.000729</d>
<d>-0.006832</d>
<d>0.011478</d>
<d>0.005375</d>
<d>0.011478</d>
<d>0.011478</d>
<d>0.005375</d>
<d>0.005375</d>
<d>0.017582</d>
<d>0.011478</d>
<d>0.011478</d>
<d>0.017582</d>
<d>0.017582</d>
<d>0.011478</d>
<d>0.005375</d>
<d>-0.000729</d>
<d>-0.000729</d>
<d>0.005375</d>
<d>0.017582</d>
<d>0.005375</d>
<d>0.011478</d>
<d>0.017582</d>
<d>0.023685</d>
<d>0.011478</d>
<d>0.017582</d>
<d>0.005375</d>
<d>-0.000729</d>
<d>0.017582</d>
<d>0.017582</d>
<d>-0.000729</d>
<d>0.005375</d>
<d>-0.006832</d>
<d>0.005375</d>
<d>0.005375</d>
<d>0.011478</d>
<d>0.017582</d>
<d>0.017582</d>
<d>0.011478</d>
<d>0.011478</d>
<d>0.017582</d>
<d>0.011478</d>
<d>0.005375</d>
<d>0.005375</d>
<d>-0.006832</d>
<d>-0.019039</d>
<d>-0.019039</d>
<d>-0.019039</d>
<d>-0.019039</d>
<d>-0.012936</d>
<d>-0.000729</d>
<d>-0.000729</d>
<d>-0.006832</d>
<d>0.005375</d>
<d>0.011478</d>
<d>0.005375</d>
<d>0.005375</d>
<d>0.005375</d>
<d>-0.006832</d>
<d>-0.012936</d>
<d>-0.012936</d>
<d>-0.006832</d>
<d>-0.006832</d>
<d>0.011478</d>
<d>0.023685</d>
<d>0.023685</d>
<d>0.017582</d>
<d>-0.000729</d>
<d>0.005375</d>
<d>0.005375</d>
<d>0.011478</d>
<d>0.011478</d>
<d>-0.000729</d>
<d>-0.000729</d>
<d>-0.000729</d>
<d>-0.000729</d>
<d>-0.000729</d>
<d>-0.000729</d>
<d>0.005375</d>
<d>-0.000729</d>
<d>-0.006832</d>
<d>-0.006832</d>
<d>0.005375</d>
<d>-0.012936</d>
<d>-0.006832</d>
<d>-0.000729</d>
<d>-0.000729</d>
<d>0.011478</d>
<d>0.017582</d>
<d>0.011478</d>
<d>0.011478</d>
<d>0.023685</d>
<d>0.017582</d>
<d>0.011478</d>
<d>-0.012936</d>
<d>-0.019039</d>
<d>-0.000729</d>
<d>-0.000729</d>
<d>0.005375</d>
<d>0.005375</d>
<d>-0.019039</d>
<d>-0.012936</d>
<d>-0.006832</d>
<d>0.005375</d>
<d>-0.006832</d>
<d>-0.012936</d>
<d>-0.006832</d>
<d>-0.012936</d>
<d>-0.000729</d>
<d>0.011478</d>
<d>0.011478</d>
<d>0.005375</d>
<d>-0.000729</d>
<d>0.011478</d>
<d>0.011478</d>
<d>0.005375</d>
<d>0.017582</d>
<d>0.005375</d>
<d>0.005375</d>
<d>0.005375</d>
<d>-0.000729</d>
<d>0.011478</d>
<d>0.011478</d>
<d>0.005375</d>
<d>0.011478</d>
<d>0.017582</d>
<d>0.017582</d>
<d>0.017582</d>
<d>-0.000729</d>
<d>-0.019039</d>
<d>-0.006832</d>
<d>-0.006832</d>
<d>0.005375</d>
<d>-0.000729</d>
<d>0.011478</d>
<d>0.017582</d>
<d>0.011478</d>
<d>0.023685</d>
<d>0.005375</d>
<d>0.005375</d>
<d>0.011478</d>
<d>0.011478</d>
<d>0.005375</d>
<d>-0.000729</d>
<d>-0.006832</d>
<d>-0.006832</d>
<d>-0.006832</d>
<d>-0.012936</d>
<d>-0.012936</d>
<d>-0.000729</d>
<d>-0.012936</d>
<d>-0.019039</d>
<d>-0.000729</d>
<d>0.005375</d>
<d>0.005375</d>
<d>-0.000729</d>
<d>0.005375</d>
<d>0.017582</d>
<d>0.005375</d>
<d>-0.006832</d>
<d>-0.000729</d>
<d>-0.019039</d>
<d>-0.006832</d>
<d>0.017582</d>
<d>0.023685</d>
<d>0.023685</d>
<d>0.023685</d>
<d>0.005375</d>
<d>0.005375</d>
<d>0.005375</d>
<d>0.011478</d>
<d>0.017582</d>
<d>0.005375</d>
<d>-0.000729</d>
<d>-0.019039</d>
<d>-0.006832</d>
<d>-0.006832</d>
<d>-0.019039</d>
<d>-0.019039</d>
<d>-0.000729</d>
<d>-0.006832</d>
<d>0.017582</d>
<d>0.029789</d>
<d>0.029789</d>
<d>0.023685</d>
<d>0.011478</d>
<d>0.005375</d>
<d>0.017582</d>
<d>-0.000729</d>
<d>0.005375</d>
<d>0.005375</d>
<d>0.005375</d>
<d>0.005375</d>
<d>0.011478</d>
<d>0.011478</d>
<d>0.011478</d>
<d>0.005375</d>
<d>-0.000729</d>
<d>-0.000729</d>
<d>-0.012936</d>
<d>-0.006832</d>
<d>-0.006832</d>
<d>-0.012936</d>
<d>-0.019039</d>
<d>-0.025143</d>
<d>-0.03735</d>
<d>-0.025143</d>
<d>0.005375</d>
<d>0.011478</d>
<d>0.011478</d>
<d>0.017582</d>
<d>-0.006832</d>
<d>-0.012936</d>
<d>-0.006832</d>
<d>0.005375</d>
<d>-0.000729</d>
<d>-0.019039</d>
<d>-0.000729</d>
<d>-0.012936</d>
<d>-0.006832</d>
<d>-0.006832</d>
<d>-0.006832</d>
<d>-0.006832</d>
<d>0.017582</d>
<d>0.017582</d>
<d>0.029789</d>
<d>0.011478</d>
<d>0.011478</d>
<d>0.029789</d>
<d>0.035892</d>
<d>0.023685</d>
<d>0.023685</d>
<d>0.023685</d>
<d>-0.000729</d>
<d>0.011478</d>
<d>0.011478</d>
<d>0.005375</d>
<d>0.011478</d>
<d>-0.000729</d>
<d>0.005375</d>
<d>-0.012936</d>
<d>-0.012936</d>
<d>-0.006832</d>
<d>-0.000729</d>
<d>-0.000729</d>
<d>-0.000729</d>
<d>0.005375</d>
<d>-0.000729</d>
<d>-0.000729</d>
<d>0.011478</d>
<d>-0.000729</d>
<d>-0.000729</d>
<d>-0.006832</d>
<d>0.011478</d>
<d>0.017582</d>
<d>0.005375</d>
<d>0.005375</d>
<d>0.005375</d>
<d>-0.000729</d>
<d>-0.000729</d>
<d>-0.000729</d>
<d>-0.019039</d>
<d>-0.006832</d>
<d>-0.006832</d>
<d>-0.012936</d>
<d>-0.000729</d>
<d>0.005375</d>
<d>0.011478</d>
<d>0.011478</d>
<d>0.005375</d>
<d>0.011478</d>
<d>0.017582</d>
<d>0.005375</d>
<d>-0.000729</d>
<d>0.011478</d>
<d>0.011478</d>
<d>0.017582</d>
<d>0.011478</d>
<d>0.023685</d>
<d>0.017582</d>
<d>0.011478</d>
<d>0.011478</d>
<d>0.005375</d>
<d>0.011478</d>
<d>0.011478</d>
<d>0.005375</d>
<d>-0.000729</d>
<d>-0.019039</d>
<d>-0.006832</d>
<d>0.011478</d>
<d>0.017582</d>
<d>0.005375</d>
<d>0.011478</d>
<d>0.005375</d>
<d>0.017582</d>
<d>0.017582</d>
<d>-0.006832</d>
<d>-0.000729</d>
<d>-0.000729</d>
<d>-0.012936</d>
<d>-0.006832</d>
<d>-0.006832</d>
<d>-0.000729</d>
<d>0.005375</d>
<d>0.011478</d>
<d>0.005375</d>
<d>0.011478</d>
<d>-0.000729</d>
<d>-0.019039</d>
<d>-0.006832</d>
<d>-0.006832</d>
<d>-0.012936</d>
<d>-0.019039</d>
<d>-0.006832</d>
<d>-0.012936</d>
<d>-0.012936</d>
<d>-0.025143</d>
<d>-0.019039</d>
<d>-0.006832</d>
<d>-0.012936</d>
<d>-0.006832</d>
<d>0.005375</d>
<d>-0.000729</d>
<d>-0.000729</d>
<d>0.011478</d>
<d>0.011478</d>
<d>0.017582</d>
<d>0.017582</d>
<d>0.017582</d>
<d>0.029789</d>
<d>0.029789</d>
<d>0.017582</d>
<d>0.017582</d>
<d>0.023685</d>
<d>0.023685</d>
<d>0.023685</d>
<d>0.005375</d>
<d>0.017582</d>
<d>0.005375</d>
<d>-0.000729</d>
<d>-0.012936</d>
<d>-0.012936</d>
<d>0.011478</d>
<d>0.011478</d>
<d>0.011478</d>
<d>0.005375</d>
<d>-0.012936</d>
<d>-0.019039</d>
<d>-0.012936</d>
<d>-0.012936</d>
<d>-0.000729</d>
<d>0.011478</d>
<d>0.011478</d>
<d>0.005375</d>
<d>0.011478</d>
<d>-0.000729</d>
<d>-0.000729</d>
<d>0.005375</d>
<d>0.005375</d>
<d>0.005375</d>
<d>0.005375</d>
<d>0.005375</d>
<d>-0.000729</d>
<d>-0.38525</d>
<d>-0.879635</d>
<d>-0.482906</d>
<d>0.078617</d>
<d>0.011478</d>
<d>-0.049557</d>
<d>0.005375</d>
<d>0.029789</d>
<d>0.029789</d>
<d>0.035892</d>
<d>0.054203</d>
<d>0.06641</d>
<d>0.06641</d>
<d>0.054203</d>
<d>0.035892</d>
<d>0.041996</d>
<d>0.041996</d>
<d>0.06641</d>
<d>0.054203</d>
<d>0.0481</d>
<d>0.054203</d>
<d>0.041996</d>
<d>0.035892</d>
<d>0.041996</d>
<d>0.041996</d>
<d>0.041996</d>
<d>0.029789</d>
<d>0.041996</d>
<d>0.041996</d>
<d>0.029789</d>
<d>0.023685</d>
<d>0.023685</d>
<d>0.023685</d>
<d>0.029789</d>
<d>0.029789</d>
<d>0.023685</d>
<d>0.017582</d>
<d>0.023685</d>
<d>0.011478</d>
<d>0.017582</d>
<d>0.023685</d>
<d>0.023685</d>
<d>0.005375</d>
<d>0.011478</d>
<d>0.005375</d>
<d>-0.000729</d>
<d>0.005375</d>
<d>0.005375</d>
<d>0.011478</d>
<d>0.011478</d>
<d>-0.05566</d>
<d>-0.110592</d>
<d>-0.092281</d>
<d>-0.073971</d>
<d>-0.05566</d>
<d>-0.03735</d>
<d>-0.03735</d>
<d>-0.043453</d>
<d>-0.03735</d>
<d>-0.03735</d>
<d>-0.031246</d>
<d>-0.019039</d>
<d>-0.019039</d>
<d>-0.03735</d>
<d>-0.025143</d>
<d>-0.03735</d>
<d>-0.05566</d>
<d>-0.073971</d>
<d>-0.086178</d>
<d>-0.086178</d>
<d>-0.080074</d>
<d>-0.080074</d>
<d>-0.080074</d>
<d>-0.092281</d>
<d>-0.104488</d>
<d>-0.122799</d>
<d>-0.128902</d>
<d>-0.135006</d>
<d>-0.147213</d>
<d>-0.171627</d>
<d>-0.171627</d>
<d>-0.165524</d>
<d>-0.171627</d>
<d>-0.183834</d>
<d>-0.183834</d>
<d>-0.177731</d>
<d>-0.183834</d>
<d>-0.183834</d>
<d>-0.189938</d>
<d>-0.202145</d>
<d>-0.214352</d>
<d>-0.202145</d>
<d>-0.208248</d>
<d>-0.220455</d>
<d>-0.226559</d>
<d>-0.226559</d>
<d>-0.232662</d>
<d>-0.226559</d>
<d>-0.220455</d>
<d>-0.232662</d>
<d>-0.238766</d>
<d>-0.238766</d>
<d>-0.244869</d>
<d>-0.244869</d>
<d>-0.220455</d>
<d>-0.238766</d>
<d>-0.232662</d>
<d>-0.220455</d>
<d>-0.214352</d>
<d>-0.214352</d>
<d>-0.220455</d>
<d>-0.232662</d>
<d>-0.238766</d>
<d>-0.244869</d>
<d>-0.244869</d>
<d>-0.244869</d>
<d>-0.244869</d>
<d>-0.232662</d>
<d>-0.232662</d>
<d>-0.232662</d>
<d>-0.220455</d>
<d>-0.220455</d>
<d>-0.226559</d>
<d>-0.232662</d>
<d>-0.238766</d>
<d>-0.226559</d>
<d>-0.232662</d>
<d>-0.226559</d>
<d>-0.214352</d>
<d>-0.220455</d>
<d>-0.208248</d>
<d>-0.220455</d>
<d>-0.232662</d>
<d>-0.226559</d>
<d>-0.232662</d>
<d>-0.232662</d>
<d>-0.232662</d>
<d>-0.214352</d>
<d>-0.208248</d>
<d>-0.214352</d>
<d>-0.196041</d>
<d>-0.202145</d>
<d>-0.208248</d>
<d>-0.202145</d>
<d>-0.196041</d>
<d>-0.183834</d>
<d>-0.183834</d>
<d>-0.196041</d>
<d>-0.196041</d>
<d>-0.189938</d>
<d>-0.208248</d>
<d>-0.208248</d>
<d>-0.214352</d>
<d>-0.208248</d>
<d>-0.183834</d>
<d>-0.171627</d>
<d>-0.165524</d>
<d>-0.177731</d>
<d>-0.189938</d>
<d>-0.208248</d>
<d>-0.208248</d>
<d>-0.196041</d>
<d>-0.196041</d>
<d>-0.202145</d>
<d>-0.202145</d>
<d>-0.208248</d>
<d>-0.196041</d>
<d>-0.196041</d>
<d>-0.189938</d>
<d>-0.196041</d>
<d>-0.189938</d>
<d>-0.183834</d>
<d>-0.171627</d>
<d>-0.171627</d>
<d>-0.165524</d>
<d>-0.171627</d>
<d>-0.177731</d>
<d>-0.165524</d>
<d>-0.165524</d>
<d>-0.153316</d>
<d>-0.147213</d>
<d>-0.153316</d>
<d>-0.147213</d>
<d>-0.15942</d>
<d>-0.153316</d>
<d>-0.153316</d>
<d>-0.153316</d>
<d>-0.153316</d>
<d>-0.153316</d>
<d>-0.141109</d>
<d>-0.147213</d>
<d>-0.135006</d>
<d>-0.128902</d>
<d>-0.141109</d>
<d>-0.147213</d>
<d>-0.153316</d>
<d>-0.165524</d>
<d>-0.147213</d>
<d>-0.147213</d>
<d>-0.141109</d>
<d>-0.128902</d>
<d>-0.147213</d>
<d>-0.135006</d>
<d>-0.128902</d>
<d>-0.141109</d>
<d>-0.141109</d>
<d>-0.141109</d>
<d>-0.141109</d>
<d>-0.128902</d>
<d>-0.135006</d>
<d>-0.153316</d>
<d>-0.153316</d>
<d>-0.141109</d>
<d>-0.141109</d>
<d>-0.141109</d>
<d>-0.122799</d>
<d>-0.128902</d>
<d>-0.128902</d>
<d>-0.110592</d>
<d>-0.116695</d>
<d>-0.116695</d>
<d>-0.128902</d>
<d>-0.122799</d>
<d>-0.116695</d>
<d>-0.110592</d>
<d>-0.098385</d>
<d>-0.098385</d>
<d>-0.104488</d>
<d>-0.104488</d>
<d>-0.110592</d>
<d>-0.116695</d>
<d>-0.116695</d>
<d>-0.116695</d>
<d>-0.110592</d>
<d>-0.110592</d>
<d>-0.098385</d>
<d>-0.086178</d>
<d>-0.092281</d>
<d>-0.098385</d>
<d>-0.067867</d>
<d>-0.073971</d>
<d>-0.080074</d>
<d>-0.073971</d>
<d>-0.086178</d>
<d>-0.086178</d>
<d>-0.086178</d>
<d>-0.092281</d>
<d>-0.092281</d>
<d>-0.092281</d>
<d>-0.104488</d>
<d>-0.098385</d>
<d>-0.092281</d>
<d>-0.092281</d>
<d>-0.080074</d>
<d>-0.080074</d>
<d>-0.086178</d>
<d>-0.080074</d>
<d>-0.086178</d>
<d>-0.080074</d>
<d>-0.05566</d>
<d>-0.049557</d>
<d>-0.061764</d>
<d>-0.073971</d>
<d>-0.073971</d>
<d>-0.073971</d>
<d>-0.092281</d>
<d>-0.086178</d>
<d>-0.080074</d>
<d>-0.080074</d>
<d>-0.086178</d>
<d>-0.080074</d>
<d>-0.067867</d>
<d>-0.067867</d>
<d>-0.086178</d>
<d>-0.086178</d>
<d>-0.073971</d>
<d>-0.073971</d>
<d>-0.067867</d>
<d>-0.073971</d>
<d>-0.061764</d>
<d>-0.067867</d>
<d>-0.061764</d>
<d>-0.05566</d>
<d>-0.049557</d>
<d>-0.043453</d>
<d>-0.03735</d>
<d>-0.049557</d>
<d>-0.049557</d>
<d>-0.043453</d>
<d>-0.043453</d>
<d>-0.043453</d>
<d>-0.043453</d>
<d>-0.049557</d>
<d>-0.043453</d>
<d>-0.031246</d>
<d>-0.043453</d>
<d>-0.031246</d>
<d>-0.031246</d>
<d>-0.043453</d>
<d>-0.061764</d>
<d>-0.05566</d>
<d>-0.049557</d>
<d>-0.03735</d>
<d>-0.043453</d>
<d>-0.043453</d>
<d>-0.05566</d>
<d>-0.049557</d>
<d>-0.061764</d>
<d>-0.067867</d>
<d>-0.049557</d>
<d>-0.067867</d>
<d>-0.049557</d>
<d>-0.031246</d>
<d>-0.03735</d>
<d>-0.025143</d>
<d>-0.031246</d>
<d>-0.049557</d>
<d>-0.043453</d>
<d>-0.031246</d>
<d>-0.03735</d>
<d>-0.031246</d>
<d>-0.03735</d>
<d>-0.031246</d>
<d>-0.03735</d>
<d>-0.03735</d>
<d>-0.031246</d>
<d>-0.031246</d>
<d>-0.043453</d>
<d>-0.049557</d>
<d>-0.043453</d>
<d>-0.031246</d>
<d>-0.03735</d>
<d>-0.031246</d>
<d>-0.043453</d>
<d>-0.03735</d>
<d>-0.043453</d>
<d>-0.043453</d>
<d>-0.049557</d>
<d>-0.043453</d>
<d>-0.043453</d>
<d>-0.031246</d>
<d>-0.025143</d>
<d>-0.025143</d>
<d>-0.012936</d>
<d>-0.025143</d>
<d>-0.025143</d>
<d>-0.031246</d>
<d>-0.031246</d>
<d>-0.025143</d>
<d>-0.025143</d>
<d>-0.03735</d>
<d>-0.043453</d>
<d>-0.03735</d>
<d>-0.03735</d>
<d>-0.031246</d>
<d>-0.025143</d>
<d>-0.031246</d>
<d>-0.031246</d>
<d>-0.019039</d>
<d>-0.031246</d>
<d>-0.025143</d>
<d>-0.025143</d>
<d>-0.006832</d>
<d>-0.012936</d>
<d>-0.031246</d>
<d>-0.019039</d>
<d>-0.03735</d>
<d>-0.031246</d>
<d>-0.031246</d>
<d>-0.03735</d>
<d>-0.031246</d>
<d>-0.019039</d>
<d>-0.025143</d>
<d>-0.031246</d>
<d>-0.043453</d>
<d>-0.025143</d>
<d>-0.012936</d>
<d>-0.019039</d>
<d>-0.012936</d>
<d>0.005375</d>
<d>-0.006832</d>
<d>-0.006832</d>
<d>-0.019039</d>
<d>-0.019039</d>
<d>-0.025143</d>
<d>-0.019039</d>
<d>-0.019039</d>
<d>-0.000729</d>
<d>-0.012936</d>
<d>-0.019039</d>
<d>-0.019039</d>
<d>-0.025143</d>
<d>-0.019039</d>
<d>-0.025143</d>
<d>-0.019039</d>
<d>-0.019039</d>
<d>-0.031246</d>
<d>-0.031246</d>
<d>-0.019039</d>
<d>-0.012936</d>
<d>-0.012936</d>
<d>-0.006832</d>
<d>-0.019039</d>
<d>-0.019039</d>
<d>-0.031246</d>
<d>-0.03735</d>
<d>-0.025143</d>
<d>-0.031246</d>
<d>-0.03735</d>
<d>-0.03735</d>
<d>-0.019039</d>
<d>-0.000729</d>
<d>-0.000729</d>
<d>-0.000729</d>
<d>-0.012936</d>
<d>-0.012936</d>
<d>-0.019039</d>
<d>-0.019039</d>
<d>-0.006832</d>
<d>-0.006832</d>
<d>-0.006832</d>
<d>-0.000729</d>
<d>-0.000729</d>
<d>-0.000729</d>
<d>-0.000729</d>
<d>-0.019039</d>
<d>-0.019039</d>
<d>-0.012936</d>
<d>-0.000729</d>
<d>0.011478</d>
<d>-0.000729</d>
<d>-0.012936</d>
<d>-0.006832</d>
<d>-0.012936</d>
<d>-0.000729</d>
<d>-0.006832</d>
<d>-0.000729</d>
<d>-0.012936</d>
<d>-0.012936</d>
<d>-0.006832</d>
<d>-0.012936</d>
<d>-0.006832</d>
<d>-0.006832</d>
<d>-0.000729</d>
<d>0.011478</d>
<d>-0.000729</d>
<d>0.005375</d>
<d>0.017582</d>
<d>0.005375</d>
<d>-0.006832</d>
<d>-0.006832</d>
<d>-0.019039</d>
<d>-0.012936</d>
<d>-0.012936</d>
<d>-0.006832</d>
<d>-0.019039</d>
<d>-0.000729</d>
<d>-0.019039</d>
<d>-0.012936</d>
<d>-0.006832</d>
<d>0.011478</d>
<d>-0.000729</d>
<d>-0.000729</d>
<d>0.005375</d>
<d>-0.000729</d>
<d>-0.006832</d>
<d>-0.000729</d>
<d>-0.006832</d>
<d>-0.006832</d>
<d>-0.006832</d>
<d>-0.000729</d>
<d>-0.006832</d>
<d>-0.006832</d>
<d>-0.012936</d>
<d>-0.000729</d>
<d>-0.006832</d>
<d>-0.012936</d>
<d>-0.000729</d>
<d>-0.006832</d>
<d>-0.000729</d>
<d>-0.006832</d>
<d>0.005375</d>
<d>0.005375</d>
<d>0.011478</d>
<d>0.017582</d>
<d>0.017582</d>
<d>0.005375</d>
<d>-0.012936</d>
<d>-0.025143</d>
<d>-0.006832</d>
<d>-0.006832</d>
<d>-0.006832</d>
<d>-0.000729</d>
<d>-0.006832</d>
<d>-0.012936</d>
<d>-0.012936</d>
<d>-0.012936</d>
<d>-0.025143</d>
<d>-0.000729</d>
<d>-0.000729</d>
<d>-0.012936</d>
<d>-0.000729</d>
<d>-0.000729</d>
<d>0.005375</d>
<d>0.017582</d>
<d>-0.006832</d>
<d>-0.012936</d>
<d>-0.006832</d>
<d>-0.006832</d>
<d>-0.006832</d>
<d>-0.006832</d>
<d>0.005375</d>
<d>-0.006832</d>
<d>-0.019039</d>
<d>-0.000729</d>
<d>-0.000729</d>
<d>-0.000729</d>
<d>0.011478</d>
<d>-0.012936</d>
<d>-0.006832</d>
<d>-0.000729</d>
<d>0.005375</d>
<d>-0.019039</d>
<d>-0.025143</d>
<d>-0.031246</d>
<d>-0.031246</d>
<d>-0.019039</d>
<d>0.005375</d>
<d>-0.006832</d>
<d>-0.012936</d>
<d>-0.006832</d>
<d>-0.019039</d>
<d>-0.012936</d>
<d>-0.000729</d>
<d>-0.012936</d>
<d>-0.019039</d>
<d>-0.019039</d>
<d>-0.025143</d>
<d>-0.025143</d>
<d>-0.012936</d>
<d>-0.012936</d>
<d>-0.006832</d>
<d>0.005375</d>
<d>-0.000729</d>
<d>-0.012936</d>
<d>-0.012936</d>
<d>-0.012936</d>
<d>-0.000729</d>
<d>-0.000729</d>
<d>0.005375</d>
<d>-0.000729</d>
<d>-0.006832</d>
<d>-0.012936</d>
<d>-0.012936</d>
<d>-0.006832</d>
<d>-0.006832</d>
<d>-0.000729</d>
<d>-0.000729</d>
<d>0.005375</d>
<d>0.017582</d>
<d>0.011478</d>
<d>0.005375</d>
<d>-0.019039</d>
<d>-0.006832</d>
<d>0.005375</d>
<d>0.011478</d>
<d>0.011478</d>
<d>-0.000729</d>
<d>0.005375</d>
<d>-0.006832</d>
<d>-0.019039</d>
<d>-0.012936</d>
<d>0.005375</d>
<d>0.017582</d>
<d>0.029789</d>
<d>0.005375</d>
<d>-0.006832</d>
<d>-0.006832</d>
<d>-0.000729</d>
<d>0.005375</d>
<d>0.023685</d>
<d>0.023685</d>
<d>0.023685</d>
<d>0.023685</d>
<d>0.023685</d>
<d>-0.006832</d>
<d>0.023685</d>
<d>0.005375</d>
<d>-0.006832</d>
<d>-0.006832</d>
<d>-0.000729</d>
<d>0.005375</d>
<d>0.017582</d>
<d>0.005375</d>
<d>-0.000729</d>
<d>-0.006832</d>
<d>-0.006832</d>
<d>0.005375</d>
<d>-0.000729</d>
<d>0.004136</d>
<d>-0.00197</d>
<d>-0.00197</d>
<d>-0.00197</d>
<d>-0.01417</d>
<d>-0.00807</d>
<d>-0.00197</d>
<d>-0.00807</d>
<d>0.010239</d>
<d>0.010239</d>
<d>0.010239</d>
<d>0.010239</d>
<d>0.004136</d>
<d>0.010239</d>
<d>-0.00807</d>
<d>-0.00197</d>
<d>-0.00197</d>
<d>-0.01417</d>
<d>-0.01417</d>
<d>-0.01417</d>
<d>-0.01417</d>
<d>-0.00197</d>
<d>-0.01417</d>
<d>-0.00197</d>
<d>-0.00807</d>
<d>-0.01417</d>
<d>-0.00197</d>
<d>-0.00807</d>
<d>-0.00197</d>
<d>-0.00807</d>
<d>-0.01417</d>
<d>0.004136</d>
<d>-0.00197</d>
<d>0.010239</d>
<d>0.004136</d>
<d>0.004136</d>
<d>0.004136</d>
<d>0.004136</d>
<d>-0.00197</d>
<d>-0.00807</d>
<d>-0.00807</d>
<d>-0.00807</d>
<d>-0.00807</d>
<d>-0.01417</d>
<d>-0.01417</d>
<d>-0.00807</d>
<d>-0.00197</d>
<d>-0.00807</d>
<d>-0.00197</d>
<d>0.010239</d>
<d>0.004136</d>
<d>0.010239</d>
<d>0.004136</d>
<d>-0.00807</d>
<d>-0.00807</d>
<d>-0.01417</d>
<d>-0.00807</d>
<d>-0.02028</d>
<d>-0.02028</d>
<d>-0.01417</d>
<d>-0.02638</d>
<d>-0.01417</d>
<d>-0.01417</d>
<d>-0.01417</d>
<d>-0.01417</d>
<d>-0.01417</d>
<d>-0.01417</d>
<d>-0.00197</d>
<d>-0.00197</d>
<d>0.004136</d>
<d>-0.00197</d>
<d>-0.00197</d>
<d>-0.00197</d>
<d>-0.01417</d>
<d>-0.00807</d>
<d>-0.01417</d>
<d>-0.00807</d>
<d>-0.00197</d>
<d>-0.00197</d>
<d>0.004136</d>
<d>-0.00807</d>
<d>-0.00197</d>
<d>0.004136</d>
<d>-0.00807</d>
<d>-0.00197</d>
<d>-0.00807</d>
<d>-0.00807</d>
<d>-0.00197</d>
<d>-0.01417</d>
<d>-0.00807</d>
<d>0.004136</d>
<d>0.004136</d>
<d>0.010239</d>
<d>-0.00197</d>
<d>-0.00197</d>
<d>-0.00807</d>
<d>-0.02028</d>
<d>-0.00197</d>
<d>-0.00197</d>
<d>-0.00197</d>
<d>0.004136</d>
<d>-0.00807</d>
<d>-0.00197</d>
<d>-0.00197</d>
<d>-0.01417</d>
<d>-0.00197</d>
<d>-0.01417</d>
<d>-0.00807</d>
<d>-0.01417</d>
<d>0.004136</d>
<d>-0.00197</d>
<d>-0.00197</d>
<d>-0.00807</d>
<d>-0.00807</d>
<d>-0.01417</d>
<d>-0.00807</d>
<d>-0.00807</d>
<d>-0.00807</d>
<d>-0.00807</d>
<d>-0.01417</d>
<d>-0.00197</d>
<d>-0.00807</d>
<d>-0.00807</d>
<d>0.004136</d>
<d>-0.00197</d>
<d>0.010239</d>
<d>-0.00197</d>
<d>-0.00807</d>
<d>-0.00197</d>
<d>-0.02028</d>
<d>-0.00197</d>
<d>-0.00807</d>
<d>-0.00807</d>
<d>0.004136</d>
<d>0.004136</d>
<d>0.004136</d>
<d>-0.00197</d>
<d>-0.00807</d>
<d>0.004136</d>
<d>-0.00807</d>
<d>-0.00807</d>
<d>-0.01417</d>
<d>-0.02028</d>
<d>-0.00197</d>
<d>-0.00807</d>
<d>-0.00807</d>
<d>-0.01417</d>
<d>-0.01417</d>
<d>-0.00807</d>
<d>-0.00807</d>
<d>-0.01417</d>
<d>-0.00807</d>
<d>-0.00807</d>
<d>-0.00807</d>
<d>-0.02028</d>
<d>-0.02028</d>
<d>-0.01417</d>
<d>-0.02028</d>
<d>-0.00807</d>
<d>-0.01417</d>
<d>-0.00197</d>
<d>0.004136</d>
<d>0.004136</d>
<d>0.004136</d>
<d>-0.00197</d>
<d>-0.01417</d>
<d>-0.00197</d>
<d>-0.00807</d>
<d>-0.00807</d>
<d>-0.00197</d>
<d>-0.01417</d>
<d>-0.00197</d>
<d>-0.01417</d>
<d>-0.00807</d>
<d>0.004136</d>
<d>0.004136</d>
<d>0.010239</d>
<d>-0.00197</d>
<d>0.004136</d>
<d>0.010239</d>
<d>0.004136</d>
<d>0.004136</d>
<d>-0.00807</d>
<d>-0.00807</d>
<d>-0.00807</d>
<d>-0.02028</d>
<d>-0.01417</d>
<d>-0.00807</d>
<d>-0.01417</d>
<d>0.004136</d>
<d>-0.00807</d>
<d>-0.00197</d>
<d>-0.00197</d>
<d>-0.00197</d>
<d>0.004136</d>
<d>-0.00197</d>
<d>-0.00807</d>
<d>0.010239</d>
<d>0.004136</d>
<d>-0.00197</d>
<d>-0.00197</d>
<d>-0.00197</d>
<d>0.004136</d>
<d>-0.00197</d>
<d>0.004136</d>
<d>-0.00807</d>
<d>-0.00197</d>
<d>0.004136</d>
<d>-0.00197</d>
<d>0.004136</d>
<d>0.004136</d>
<d>0.004136</d>
<d>0.010239</d>
<d>0.016343</d>
<d>0.010239</d>
<d>0.016343</d>
<d>0.004136</d>
<d>0.004136</d>
<d>-0.00197</d>
<d>0.004136</d>
<d>-0.00197</d>
<d>-0.00807</d>
<d>-0.00807</d>
<d>-0.01417</d>
<d>-0.00197</d>
<d>0.004136</d>
<d>0.004136</d>
<d>0.004136</d>
<d>-0.00197</d>
<d>-0.01417</d>
<d>-0.00807</d>
<d>-0.02028</d>
<d>0.004136</d>
<d>0.010239</d>
<d>0.004136</d>
<d>0.016343</d>
<d>0.004136</d>
<d>0.010239</d>
<d>0.004136</d>
<d>-0.00197</d>
<d>-0.00197</d>
<d>-0.00807</d>
<d>0.004136</d>
<d>0.016343</d>
<d>0.004136</d>
<d>0.010239</d>
<d>-0.00197</d>
<d>-0.00197</d>
<d>0.010239</d>
<d>-0.00807</d>
<d>-0.00197</d>
<d>-0.02028</d>
<d>-0.00807</d>
<d>0.004136</d>
<d>0.004136</d>
<d>0.010239</d>
<d>0.004136</d>
<d>0.004136</d>
<d>0.004136</d>
<d>0.004136</d>
<d>-0.00197</d>
<d>-0.00197</d>
<d>-0.00197</d>
<d>-0.00807</d>
<d>-0.01417</d>
<d>-0.00807</d>
<d>-0.02028</d>
<d>-0.01417</d>
<d>-0.00197</d>
<d>-0.01417</d>
<d>-0.01417</d>
<d>0.004136</d>
<d>-0.00807</d>
<d>0.004136</d>
<d>0.004136</d>
<d>-0.00197</d>
<d>0.004136</d>
<d>-0.00197</d>
<d>0.004136</d>
<d>-0.00197</d>
<d>-0.00807</d>
<d>-0.00197</d>
<d>-0.00197</d>
<d>0.004136</d>
<d>-0.00197</d>
<d>-0.00197</d>
<d>-0.00197</d>
<d>-0.01417</d>
<d>-0.01417</d>
<d>-0.01417</d>
<d>-0.02028</d>
<d>-0.00807</d>
<d>-0.01417</d>
<d>-0.00197</d>
<d>-0.00197</d>
<d>-0.00197</d>
<d>-0.00197</d>
<d>0.004136</d>
<d>0.004136</d>
<d>0.016343</d>
<d>0.022446</d>
<d>0.016343</d>
<d>-0.00197</d>
<d>-0.01417</d>
<d>-0.00197</d>
<d>-0.01417</d>
<d>-0.00807</d>
<d>-0.00197</d>
<d>0.004136</d>
<d>0.010239</d>
<d>-0.01417</d>
<d>-0.00807</d>
<d>-0.01417</d>
<d>-0.01417</d>
<d>0.004136</d>
<d>-0.00197</d>
<d>0.004136</d>
<d>-0.00197</d>
<d>-0.00807</d>
<d>0.004136</d>
<d>-0.00807</d>
<d>-0.00197</d>
<d>-0.00197</d>
<d>-0.00807</d>
<d>-0.00807</d>
<d>-0.00197</d>
<d>0.016343</d>
<d>0.022446</d>
<d>0.016343</d>
<d>0.016343</d>
<d>0.004136</d>
<d>-0.00197</d>
<d>0.010239</d>
<d>0.010239</d>
<d>0.022446</d>
<d>0.022446</d>
<d>0.010239</d>
<d>0.016343</d>
<d>0.004136</d>
<d>0.004136</d>
<d>0.004136</d>
<d>-0.00197</d>
<d>0.016343</d>
<d>0.010239</d>
<d>0.010239</d>
<d>0.004136</d>
<d>-0.00197</d>
<d>-0.00197</d>
<d>-0.00807</d>
<d>-0.00807</d>
<d>0.004136</d>
<d>-0.00807</d>
<d>0.004136</d>
<d>-0.00197</d>
<d>-0.00807</d>
<d>0.004136</d>
<d>-0.00197</d>
<d>-0.00197</d>
<d>0.004136</d>
<d>-0.00197</d>
<d>0.016343</d>
<d>0.010239</d>
<d>0.016343</d>
<d>0.016343</d>
<d>0.010239</d>
<d>0.004136</d>
<d>-0.00197</d>
<d>-0.00807</d>
<d>-0.00807</d>
<d>-0.01417</d>
<d>-0.00197</d>
<d>-0.01417</d>
<d>-0.00197</d>
<d>0.004136</d>
<d>0.004136</d>
<d>0.010239</d>
<d>0.004136</d>
<d>0.004136</d>
<d>0.010239</d>
<d>-0.00807</d>
<d>-0.00197</d>
<d>-0.00197</d>
<d>-0.00197</d>
<d>0.004136</d>
<d>-0.00197</d>
<d>0.004136</d>
<d>0.010239</d>
<d>0.010239</d>
<d>0.010239</d>
<d>0.010239</d>
<d>0.010239</d>
<d>0.010239</d>
<d>0.010239</d>
<d>0.004136</d>
<d>-0.00807</d>
<d>-0.01417</d>
<d>0.004136</d>
<d>-0.00197</d>
<d>0.010239</d>
<d>0.004136</d>
<d>-0.00197</d>
<d>-0.00197</d>
<d>-0.00197</d>
<d>-0.00807</d>
<d>-0.00807</d>
<d>-0.00197</d>
<d>0.010239</d>
<d>0.004136</d>
<d>0.010239</d>
<d>0.010239</d>
<d>0.004136</d>
<d>0.016343</d>
<d>0.004136</d>
<d>-0.00197</d>
<d>-0.01417</d>
<d>-0.02028</d>
<d>-0.01417</d>
<d>-0.02028</d>
<d>-0.00807</d>
<d>0.004136</d>
<d>0.004136</d>
<d>0.010239</d>
<d>0.004136</d>
<d>0.004136</d>
<d>0.004136</d>
<d>0.004136</d>
<d>0.010239</d>
<d>0.004136</d>
<d>0.004136</d>
<d>0.010239</d>
<d>-0.00197</d>
<d>0.004136</d>
<d>-0.00197</d>
<d>-0.00807</d>
<d>0.004136</d>
<d>-0.00197</d>
<d>0.016343</d>
<d>0.016343</d>
<d>0.016343</d>
<d>0.016343</d>
<d>0.004136</d>
<d>0.004136</d>
<d>0.004136</d>
<d>-0.00197</d>
<d>0.004136</d>
<d>0.004136</d>
<d>0.010239</d>
<d>0.016343</d>
<d>0.004136</d>
<d>0.010239</d>
<d>0.004136</d>
<d>0.004136</d>
<d>0.016343</d>
<d>0.010239</d>
<d>0.010239</d>
<d>0.010239</d>
<d>-0.00807</d>
<d>0.004136</d>
<d>0.004136</d>
<d>0.010239</d>
<d>0.004136</d>
<d>0.004136</d>
<d>0.004136</d>
<d>0.004136</d>
<d>0.010239</d>
<d>0.004136</d>
<d>0.004136</d>
<d>0.010239</d>
<d>0.004136</d>
<d>0.004136</d>
<d>0.010239</d>
<d>0.004136</d>
<d>0.004136</d>
<d>-0.00197</d>
<d>-0.00197</d>
<d>0.010239</d>
<d>0.004136</d>
<d>0.010239</d>
<d>0.004136</d>
<d>0.004136</d>
<d>0.016343</d>
<d>0.010239</d>
<d>0.016343</d>
<d>0.016343</d>
<d>-0.00197</d>
<d>0.004136</d>
<d>-0.00807</d>
<d>-0.00197</d>
<d>-0.00807</d>
<d>0.004136</d>
<d>0.010239</d>
<d>0.010239</d>
<d>0.016343</d>
<d>0.016343</d>
<d>0.004136</d>
<d>0.016343</d>
<d>0.010239</d>
<d>0.010239</d>
<d>0.016343</d>
<d>0.004136</d>
<d>0.004136</d>
<d>0.004136</d>
<d>0.004136</d>
<d>0.016343</d>
<d>0.004136</d>
<d>0.010239</d>
<d>0.004136</d>
<d>-0.00197</d>
<d>0.004136</d>
<d>0.004136</d>
<d>0.010239</d>
<d>0.010239</d>
<d>-0.00197</d>
<d>-0.00197</d>
<d>-0.00807</d>
<d>-0.00197</d>
<d>-0.00197</d>
<d>-0.00807</d>
<d>-0.00197</d>
<d>-0.01417</d>
<d>-0.00807</d>
<d>-0.00197</d>
<d>-0.00807</d>
<d>0.004136</d>
<d>0.004136</d>
<d>-0.00197</d>
<d>0.004136</d>
<d>-0.00807</d>
<d>-0.00807</d>
<d>-0.00197</d>
<d>-0.01417</d>
<d>-0.01417</d>
<d>-0.01417</d>
<d>-0.00197</d>
<d>-0.00197</d>
<d>0.004136</d>
<d>0.016343</d>
<d>-0.00197</d>
<d>-0.00197</d>
<d>0.004136</d>
<d>0.004136</d>
<d>0.010239</d>
<d>0.010239</d>
<d>0.004136</d>
<d>0.004136</d>
<d>-0.01417</d>
<d>-0.00807</d>
<d>-0.00197</d>
<d>-0.00197</d>
<d>0.010239</d>
<d>0.004136</d>
<d>0.004136</d>
<d>-0.00807</d>
<d>-0.01417</d>
<d>-0.00807</d>
<d>-0.01417</d>
<d>-0.00197</d>
<d>-0.00807</d>
<d>-0.00807</d>
<d>-0.00197</d>
<d>-0.00197</d>
<d>0.010239</d>
<d>-0.00197</d>
<d>-0.00807</d>
<d>-0.00197</d>
<d>-0.00807</d>
<d>-0.00197</d>
<d>0.004136</d>
<d>0.016343</d>
<d>0.022446</d>
<d>0.010239</d>
<d>-0.00197</d>
<d>-0.00197</d>
<d>-0.01417</d>
<d>-0.00197</d>
<d>-0.00807</d>
<d>0.004136</d>
<d>0.016343</d>
<d>-0.00197</d>
<d>-0.00197</d>
<d>-0.00197</d>
<d>0.004136</d>
<d>0.010239</d>
<d>0.004136</d>
<d>0.004136</d>
<d>-0.00197</d>
<d>-0.00197</d>
<d>0.010239</d>
<d>-0.00197</d>
<d>0.004136</d>
<d>0.010239</d>
<d>-0.00197</d>
<d>0.010239</d>
<d>0.004136</d>
<d>0.004136</d>
<d>0.010239</d>
<d>-0.00197</d>
<d>0.010239</d>
<d>0.004136</d>
<d>-0.00197</d>
<d>0.016343</d>
<d>-0.00197</d>
<d>0.010239</d>
<d>-0.00197</d>
<d>-0.00197</d>
<d>0.004136</d>
<d>-0.00197</d>
<d>0.004136</d>
<d>0.004136</d>
<d>0.004136</d>
<d>0.010239</d>
<d>-0.00197</d>
<d>0.004136</d>
<d>0.004136</d>
<d>-0.00807</d>
<d>-0.00197</d>
<d>-0.00197</d>
<d>0.004136</d>
<d>-0.00197</d>
<d>-0.00197</d>
<d>-0.00197</d>
<d>-0.00807</d>
<d>-0.00807</d>
<d>0.004136</d>
<d>-0.00197</d>
<d>0.016343</d>
<d>0.016343</d>
<d>-0.00197</d>
<d>0.004136</d>
<d>-0.00197</d>
<d>0.010239</d>
<d>0.016343</d>
<d>0.010239</d>
<d>0.010239</d>
<d>-0.00197</d>
<d>-0.00197</d>
<d>0.004136</d>
<d>0.004136</d>
<d>0.010239</d>
<d>0.010239</d>
<d>0.004136</d>
<d>-0.00197</d>
<d>-0.00807</d>
<d>0.004136</d>
<d>0.004136</d>
<d>0.004136</d>
<d>0.010239</d>
<d>-0.00197</d>
<d>0.010239</d>
<d>0.010239</d>
<d>0.010239</d>
<d>0.022446</d>
<d>0.010239</d>
<d>0.016343</d>
<d>0.004136</d>
<d>-0.00197</d>
<d>0.010239</d>
<d>0.004136</d>
<d>0.004136</d>
<d>0.004136</d>
<d>0.004136</d>
<d>0.010239</d>
<d>0.004136</d>
<d>0.010239</d>
<d>0.022446</d>
<d>0.016343</d>
<d>0.022446</d>
<d>0.010239</d>
<d>0.010239</d>
<d>0.016343</d>
<d>0.004136</d>
<d>0.010239</d>
<d>-0.00807</d>
<d>-0.00197</d>
<d>0.010239</d>
<d>-0.00197</d>
<d>0.010239</d>
<d>0.010239</d>
<d>0.004136</d>
<d>0.010239</d>
<d>0.004136</d>
<d>-0.00197</d>
<d>0.004136</d>
<d>0.004136</d>
<d>0.010239</d>
<d>0.010239</d>
<d>0.016343</d>
<d>0.022446</d>
<d>0.016343</d>
<d>0.016343</d>
<d>0.010239</d>
<d>0.004136</d>
<d>0.010239</d>
<d>0.016343</d>
<d>0.016343</d>
<d>0.010239</d>
<d>0.010239</d>
<d>0.010239</d>
<d>0.010239</d>
<d>0.016343</d>
<d>0.004136</d>
<d>0.010239</d>
<d>0.010239</d>
<d>0.010239</d>
<d>0.010239</d>
<d>0.004136</d>
<d>-0.00807</d>
<d>-0.00807</d>
<d>0.004136</d>
<d>0.010239</d>
<d>0.010239</d>
<d>0.004136</d>
<d>0.004136</d>
<d>-0.00197</d>
<d>0.004136</d>
<d>0.010239</d>
<d>0.010239</d>
<d>0.010239</d>
<d>0.010239</d>
<d>-0.00197</d>
<d>0.004136</d>
<d>-0.00807</d>
<d>-0.00197</d>
<d>0.004136</d>
<d>0.004136</d>
<d>0.010239</d>
<d>-0.00197</d>
<d>-0.00197</d>
<d>-0.00807</d>
<d>-0.02028</d>
<d>-0.00807</d>
<d>-0.01417</d>
<d>0.004136</d>
<d>-0.00197</d>
<d>-0.00197</d>
<d>0.004136</d>
<d>0.004136</d>
<d>0.010239</d>
<d>0.010239</d>
<d>0.010239</d>
<d>0.016343</d>
<d>-0.00197</d>
<d>-0.00807</d>
<d>0.004136</d>
<d>0.004136</d>
<d>0.010239</d>
<d>0.004136</d>
<d>-0.00197</d>
<d>0.010239</d>
<d>-0.00197</d>
<d>0.004136</d>
<d>-0.00197</d>
<d>-0.00197</d>
<d>0.010239</d>
<d>0.004136</d>
<d>0.010239</d>
<d>0.010239</d>
<d>0.010239</d>
<d>0.010239</d>
<d>0.016343</d>
<d>0.02855</d>
<d>0.022446</d>
<d>0.022446</d>
<d>0.022446</d>
<d>0.010239</d>
<d>0.004136</d>
<d>-0.00807</d>
<d>-0.00807</d>
<d>-0.00197</d>
<d>-0.00807</d>
<d>-0.00197</d>
<d>-0.00807</d>
<d>-0.02028</d>
<d>-0.00807</d>
<d>-0.01417</d>
<d>-0.00807</d>
<d>0.010239</d>
<d>0.016343</d>
<d>0.004136</d>
<d>-0.00197</d>
<d>-0.01417</d>
<d>-0.00197</d>
<d>-0.01417</d>
<d>0.004136</d>
<d>0.004136</d>
<d>0.004136</d>
<d>0.010239</d>
<d>0.010239</d>
<d>0.010239</d>
<d>0.004136</d>
<d>0.004136</d>
<d>0.004136</d>
<d>-0.00197</d>
<d>-0.00197</d>
<d>0.010239</d>
<d>0.010239</d>
<d>0.016343</d>
<d>0.010239</d>
<d>0.004136</d>
<d>0.010239</d>
<d>0.004136</d>
<d>-0.0569</d>
<d>-0.28883</d>
<d>-0.37428</d>
<d>-0.11793</d>
<d>0.291001</d>
<d>0.864732</d>
<d>1.151597</d>
<d>0.980698</d>
<d>0.60228</d>
<d>0.248277</d>
<d>0.065171</d>
<d>0.010239</d>
<d>0.010239</d>
<d>0.02855</d>
<d>0.022446</d>
<d>0.016343</d>
<d>0.010239</d>
<d>-0.00807</d>
<d>-0.00807</d>
<d>-0.01417</d>
<d>-0.01417</d>
<d>-0.00807</d>
<d>-0.00807</d>
<d>-0.00197</d>
<d>-0.00197</d>
<d>-0.00807</d>
<d>0.004136</d>
<d>-0.01417</d>
<d>-0.01417</d>
<d>-0.01417</d>
<d>-0.00807</d>
<d>0.004136</d>
<d>-0.00197</d>
<d>0.010239</d>
<d>0.010239</d>
<d>0.016343</d>
<d>0.022446</d>
<d>0.016343</d>
<d>0.010239</d>
<d>0.016343</d>
<d>0.004136</d>
<d>0.016343</d>
<d>0.010239</d>
<d>0.016343</d>
<d>0.022446</d>
<d>0.016343</d>
<d>0.02855</d>
<d>0.02855</d>
<d>0.022446</d>
<d>0.02855</d>
<d>0.022446</d>
<d>0.022446</d>
<d>0.016343</d>
<d>0.016343</d>
<d>0.02855</d>
<d>0.02855</d>
<d>0.034653</d>
<d>0.034653</d>
<d>0.022446</d>
<d>0.016343</d>
<d>0.004136</d>
<d>0.004136</d>
<d>0.010239</d>
<d>0.010239</d>
<d>0.016343</d>
<d>0.010239</d>
<d>0.010239</d>
<d>0.010239</d>
<d>0.004136</d>
<d>0.004136</d>
<d>0.004136</d>
<d>-0.00197</d>
<d>0.004136</d>
<d>-0.00807</d>
<d>-0.01417</d>
<d>-0.02638</d>
<d>-0.04469</d>
<d>-0.04469</d>
<d>-0.0569</d>
<d>-0.063</d>
<d>-0.0569</d>
<d>-0.0569</d>
<d>-0.0508</d>
<d>-0.063</d>
<d>-0.0569</d>
<d>-0.063</d>
<d>-0.063</d>
<d>-0.063</d>
<d>-0.063</d>
<d>-0.06911</d>
<d>-0.07521</d>
<d>-0.07521</d>
<d>-0.07521</d>
<d>-0.08131</d>
<d>-0.08742</d>
<d>-0.06911</d>
<d>-0.06911</d>
<d>-0.063</d>
<d>-0.063</d>
<d>-0.06911</d>
<d>-0.06911</d>
<d>-0.08131</d>
<d>-0.06911</d>
<d>-0.063</d>
<d>-0.063</d>
<d>-0.063</d>
<d>-0.07521</d>
<d>-0.08742</d>
<d>-0.08742</d>
<d>-0.08742</d>
<d>-0.08131</d>
<d>-0.08742</d>
<d>-0.07521</d>
<d>-0.07521</d>
<d>-0.09352</d>
<d>-0.09962</d>
<d>-0.10573</d>
<d>-0.11183</d>
<d>-0.11793</d>
<d>-0.13014</d>
<d>-0.13014</d>
<d>-0.13014</d>
<d>-0.13624</d>
<d>-0.13624</d>
<d>-0.13624</d>
<d>-0.13014</d>
<d>-0.13014</d>
<d>-0.15456</d>
<d>-0.15456</d>
<d>-0.17897</d>
<d>-0.18507</d>
<d>-0.17897</d>
<d>-0.17897</d>
<d>-0.17897</d>
<d>-0.17897</d>
<d>-0.17287</d>
<d>-0.16066</d>
<d>-0.15456</d>
<d>-0.15456</d>
<d>-0.16676</d>
<d>-0.17897</d>
<d>-0.17897</d>
<d>-0.19728</d>
<d>-0.19118</d>
<d>-0.19118</d>
<d>-0.20949</d>
<d>-0.21559</d>
<d>-0.2278</d>
<d>-0.2339</d>
<d>-0.2278</d>
<d>-0.24</d>
<d>-0.2278</d>
<d>-0.24</d>
<d>-0.24611</d>
<d>-0.24611</d>
<d>-0.25831</d>
<d>-0.25831</d>
<d>-0.25831</d>
<d>-0.25221</d>
<d>-0.25831</d>
<d>-0.26442</d>
<d>-0.26442</d>
<d>-0.27052</d>
<d>-0.27052</d>
<d>-0.27663</d>
<d>-0.28273</d>
<d>-0.28273</d>
<d>-0.28883</d>
<d>-0.28273</d>
<d>-0.27663</d>
<d>-0.28273</d>
<d>-0.28273</d>
<d>-0.28273</d>
<d>-0.29494</d>
<d>-0.28883</d>
<d>-0.29494</d>
<d>-0.30104</d>
<d>-0.30714</d>
<d>-0.30714</d>
<d>-0.30104</d>
<d>-0.31325</d>
<d>-0.30714</d>
<d>-0.30714</d>
<d>-0.31935</d>
<d>-0.31325</d>
<d>-0.31935</d>
<d>-0.31935</d>
<d>-0.31325</d>
<d>-0.31935</d>
<d>-0.31325</d>
<d>-0.31935</d>
<d>-0.30714</d>
<d>-0.31325</d>
<d>-0.31935</d>
<d>-0.31935</d>
<d>-0.31935</d>
<d>-0.33156</d>
<d>-0.31325</d>
<d>-0.33156</d>
<d>-0.31935</d>
<d>-0.32545</d>
<d>-0.32545</d>
<d>-0.31325</d>
<d>-0.33156</d>
<d>-0.32545</d>
<d>-0.31935</d>
<d>-0.31935</d>
<d>-0.30714</d>
<d>-0.30104</d>
<d>-0.30104</d>
<d>-0.29494</d>
<d>-0.30714</d>
<d>-0.30104</d>
<d>-0.31325</d>
<d>-0.32545</d>
<d>-0.31325</d>
<d>-0.32545</d>
<d>-0.30714</d>
<d>-0.31935</d>
<d>-0.31935</d>
<d>-0.30714</d>
<d>-0.31325</d>
<d>-0.31325</d>
<d>-0.31325</d>
<d>-0.31325</d>
<d>-0.31325</d>
<d>-0.32545</d>
<d>-0.31935</d>
<d>-0.31935</d>
<d>-0.31935</d>
<d>-0.30714</d>
<d>-0.31325</d>
<d>-0.30714</d>
<d>-0.31935</d>
<d>-0.31935</d>
<d>-0.31325</d>
<d>-0.31325</d>
<d>-0.30714</d>
<d>-0.30714</d>
<d>-0.30714</d>
<d>-0.30104</d>
<d>-0.30104</d>
<d>-0.30104</d>
<d>-0.29494</d>
<d>-0.29494</d>
<d>-0.27663</d>
<d>-0.28273</d>
<d>-0.28883</d>
<d>-0.28883</d>
<d>-0.30104</d>
<d>-0.30104</d>
<d>-0.30104</d>
<d>-0.29494</d>
<d>-0.28273</d>
<d>-0.28883</d>
<d>-0.28883</d>
<d>-0.28883</d>
<d>-0.28883</d>
<d>-0.27663</d>
<d>-0.27663</d>
<d>-0.27052</d>
<d>-0.26442</d>
<d>-0.27052</d>
<d>-0.27052</d>
<d>-0.27052</d>
<d>-0.27052</d>
<d>-0.25831</d>
<d>-0.26442</d>
<d>-0.25831</d>
<d>-0.27052</d>
<d>-0.27663</d>
<d>-0.27052</d>
<d>-0.27052</d>
<d>-0.26442</d>
<d>-0.27052</d>
<d>-0.26442</d>
<d>-0.25221</d>
<d>-0.25221</d>
<d>-0.25221</d>
<d>-0.24611</d>
<d>-0.25221</d>
<d>-0.24</d>
<d>-0.25221</d>
<d>-0.24611</d>
<d>-0.24611</d>
<d>-0.24611</d>
<d>-0.24611</d>
<d>-0.25831</d>
<d>-0.25831</d>
<d>-0.25831</d>
<d>-0.24611</d>
<d>-0.2278</d>
<d>-0.2339</d>
<d>-0.24</d>
<d>-0.2278</d>
<d>-0.24611</d>
<d>-0.24611</d>
<d>-0.24611</d>
<d>-0.24</d>
<d>-0.2339</d>
<d>-0.2339</d>
<d>-0.22169</d>
<d>-0.21559</d>
<d>-0.2278</d>
<d>-0.2278</d>
<d>-0.2339</d>
<d>-0.2339</d>
<d>-0.2339</d>
<d>-0.24</d>
<d>-0.22169</d>
<d>-0.2278</d>
<d>-0.22169</d>
<d>-0.2278</d>
<d>-0.2339</d>
<d>-0.24</d>
<d>-0.2339</d>
<d>-0.2339</d>
<d>-0.2278</d>
<d>-0.2339</d>
<d>-0.2278</d>
<d>-0.2278</d>
<d>-0.2278</d>
<d>-0.20949</d>
<d>-0.21559</d>
<d>-0.20949</d>
<d>-0.22169</d>
<d>-0.22169</d>
<d>-0.20949</d>
<d>-0.21559</d>
<d>-0.22169</d>
<d>-0.22169</d>
<d>-0.2278</d>
<d>-0.22169</d>
<d>-0.2278</d>
<d>-0.21559</d>
<d>-0.20949</d>
<d>-0.21559</d>
<d>-0.22169</d>
<d>-0.2278</d>
<d>-0.21559</d>
<d>-0.20338</d>
<d>-0.20338</d>
<d>-0.20338</d>
<d>-0.20338</d>
<d>-0.20949</d>
<d>-0.20338</d>
<d>-0.20338</d>
<d>-0.19118</d>
<d>-0.19728</d>
<d>-0.19118</d>
<d>-0.18507</d>
<d>-0.19118</d>
<d>-0.19118</d>
<d>-0.18507</d>
<d>-0.18507</d>
<d>-0.17287</d>
<d>-0.17897</d>
<d>-0.17287</d>
<d>-0.17287</d>
<d>-0.17287</d>
<d>-0.16676</d>
<d>-0.17897</d>
<d>-0.17897</d>
<d>-0.17287</d>
<d>-0.17287</d>
<d>-0.17287</d>
<d>-0.17897</d>
<d>-0.18507</d>
<d>-0.17897</d>
<d>-0.19118</d>
<d>-0.18507</d>
<d>-0.18507</d>
<d>-0.18507</d>
<d>-0.17897</d>
<d>-0.18507</d>
<d>-0.19118</d>
<d>-0.19118</d>
<d>-0.19118</d>
<d>-0.18507</d>
<d>-0.19728</d>
<d>-0.19728</d>
<d>-0.19118</d>
<d>-0.19118</d>
<d>-0.18507</d>
<d>-0.17897</d>
<d>-0.16676</d>
<d>-0.16676</d>
<d>-0.16676</d>
<d>-0.17287</d>
<d>-0.17897</d>
<d>-0.17897</d>
<d>-0.17287</d>
<d>-0.17897</d>
<d>-0.17287</d>
<d>-0.16676</d>
<d>-0.17287</d>
<d>-0.16066</d>
<d>-0.17287</d>
<d>-0.16676</d>
<d>-0.16676</d>
<d>-0.17287</d>
<d>-0.16676</d>
<d>-0.16676</d>
<d>-0.16066</d>
<d>-0.16676</d>
<d>-0.16676</d>
<d>-0.16066</d>
<d>-0.16066</d>
<d>-0.16066</d>
<d>-0.15456</d>
<d>-0.14845</d>
<d>-0.14235</d>
<d>-0.13624</d>
<d>-0.13624</d>
<d>-0.13014</d>
<d>-0.14235</d>
<d>-0.14235</d>
<d>-0.14235</d>
<d>-0.14235</d>
<d>-0.13014</d>
<d>-0.13014</d>
<d>-0.12404</d>
<d>-0.13624</d>
<d>-0.13624</d>
<d>-0.13624</d>
<d>-0.13624</d>
<d>-0.13014</d>
<d>-0.13624</d>
<d>-0.14845</d>
<d>-0.14235</d>
<d>-0.14845</d>
<d>-0.14235</d>
<d>-0.13014</d>
<d>-0.13014</d>
<d>-0.13014</d>
<d>-0.14235</d>
<d>-0.13624</d>
<d>-0.13014</d>
<d>-0.14235</d>
<d>-0.13624</d>
<d>-0.14845</d>
<d>-0.14845</d>
<d>-0.13624</d>
<d>-0.13624</d>
<d>-0.12404</d>
<d>-0.13014</d>
<d>-0.13624</d>
<d>-0.13624</d>
<d>-0.13624</d>
<d>-0.12404</d>
<d>-0.12404</d>
<d>-0.12404</d>
<d>-0.11183</d>
<d>-0.13014</d>
<d>-0.12404</d>
<d>-0.11793</d>
<d>-0.11793</d>
<d>-0.10573</d>
<d>-0.12404</d>
<d>-0.13014</d>
<d>-0.12404</d>
<d>-0.13014</d>
<d>-0.11793</d>
<d>-0.11183</d>
<d>-0.11183</d>
<d>-0.10573</d>
<d>-0.11793</d>
<d>-0.11793</d>
<d>-0.12404</d>
<d>-0.13014</d>
<d>-0.10573</d>
<d>-0.11793</d>
<d>-0.10573</d>
<d>-0.09962</d>
<d>-0.10573</d>
<d>-0.09962</d>
<d>-0.10573</d>
<d>-0.09962</d>
<d>-0.11183</d>
<d>-0.11183</d>
<d>-0.09352</d>
<d>-0.09962</d>
<d>-0.09352</d>
<d>-0.09962</d>
<d>-0.09962</d>
<d>-0.09962</d>
<d>-0.10573</d>
<d>-0.09962</d>
<d>-0.08742</d>
<d>-0.09962</d>
<d>-0.09962</d>
<d>-0.10573</d>
<d>-0.11183</d>
<d>-0.09352</d>
<d>-0.10573</d>
<d>-0.09962</d>
<d>-0.09962</d>
<d>-0.10573</d>
<d>-0.09962</d>
<d>-0.10573</d>
<d>-0.09962</d>
<d>-0.09962</d>
<d>-0.09962</d>
<d>-0.09352</d>
<d>-0.09352</d>
<d>-0.09962</d>
<d>-0.10573</d>
<d>-0.10573</d>
<d>-0.08742</d>
<d>-0.09352</d>
<d>-0.09352</d>
<d>-0.09962</d>
<d>-0.10573</d>
<d>-0.10573</d>
<d>-0.11183</d>
<d>-0.11183</d>
<d>-0.09352</d>
<d>-0.09962</d>
<d>-0.09352</d>
<d>-0.08742</d>
<d>-0.09352</d>
<d>-0.07521</d>
<d>-0.08742</d>
<d>-0.08742</d>
<d>-0.09352</d>
<d>-0.09962</d>
<d>-0.09352</d>
<d>-0.10573</d>
<d>-0.09962</d>
<d>-0.10573</d>
<d>-0.10573</d>
<d>-0.09352</d>
<d>-0.09962</d>
<d>-0.09962</d>
<d>-0.09352</d>
<d>-0.09962</d>
<d>-0.08742</d>
<d>-0.09962</d>
<d>-0.09352</d>
<d>-0.09352</d>
<d>-0.08742</d>
<d>-0.07521</d>
<d>-0.07521</d>
<d>-0.07521</d>
<d>-0.06911</d>
<d>-0.07521</d>
<d>-0.06911</d>
<d>-0.07521</d>
<d>-0.08131</d>
<d>-0.063</d>
<d>-0.08131</d>
<d>-0.08742</d>
<d>-0.09352</d>
<d>-0.09352</d>
<d>-0.08742</d>
<d>-0.09352</d>
<d>-0.09352</d>
<d>-0.08742</d>
<d>-0.09962</d>
<d>-0.09352</d>
<d>-0.09962</d>
<d>-0.08742</d>
<d>-0.08131</d>
<d>-0.08131</d>
<d>-0.08742</d>
<d>-0.08131</d>
<d>-0.08131</d>
<d>-0.06911</d>
<d>-0.08131</d>
<d>-0.08131</d>
<d>-0.09962</d>
<d>-0.09962</d>
<d>-0.08742</d>
<d>-0.07521</d>
<d>-0.08131</d>
<d>-0.06911</d>
<d>-0.07521</d>
<d>-0.07521</d>
<d>-0.08131</d>
<d>-0.08131</d>
<d>-0.07521</d>
<d>-0.07521</d>
<d>-0.07521</d>
<d>-0.07521</d>
<d>-0.06911</d>
<d>-0.063</d>
<d>-0.063</d>
<d>-0.06911</d>
<d>-0.063</d>
<d>-0.06911</d>
<d>-0.063</d>
<d>-0.08131</d>
<d>-0.07521</d>
<d>-0.08742</d>
<d>-0.08742</d>
<d>-0.07521</d>
<d>-0.08131</d>
<d>-0.08131</d>
<d>-0.09352</d>
<d>-0.08742</d>
<d>-0.07521</d>
<d>-0.08131</d>
<d>-0.08131</d>
<d>-0.07521</d>
<d>-0.06911</d>
<d>-0.0569</d>
<d>-0.08131</d>
<d>-0.07521</d>
<d>-0.08131</d>
<d>-0.08742</d>
<d>-0.08742</d>
<d>-0.08742</d>
<d>-0.08131</d>
<d>-0.06911</d>
<d>-0.07521</d>
<d>-0.06911</d>
<d>-0.06911</d>
<d>-0.08131</d>
<d>-0.06911</d>
<d>-0.08131</d>
<d>-0.06911</d>
<d>-0.07521</d>
<d>-0.07521</d>
<d>-0.0569</d>
<d>-0.063</d>
<d>-0.063</d>
<d>-0.063</d>
<d>-0.07521</d>
<d>-0.063</d>
<d>-0.063</d>
<d>-0.063</d>
<d>-0.0569</d>
<d>-0.063</d>
<d>-0.063</d>
<d>-0.06911</d>
<d>-0.06911</d>
<d>-0.063</d>
<d>-0.06911</d>
<d>-0.063</d>
<d>-0.06911</d>
<d>-0.06911</d>
<d>-0.0508</d>
<d>-0.063</d>
<d>-0.063</d>
<d>-0.06911</d>
<d>-0.06911</d>
<d>-0.063</d>
<d>-0.063</d>
<d>-0.06911</d>
<d>-0.063</d>
<d>-0.06911</d>
<d>-0.0569</d>
<d>-0.06911</d>
<d>-0.0569</d>
<d>-0.0508</d>
<d>-0.06911</d>
<d>-0.0569</d>
<d>-0.063</d>
<d>-0.063</d>
<d>-0.0569</d>
<d>-0.0569</d>
<d>-0.0508</d>
<d>-0.0508</d>
<d>-0.0508</d>
<d>-0.04469</d>
<d>-0.0508</d>
<d>-0.0569</d>
<d>-0.0508</d>
<d>-0.063</d>
<d>-0.063</d>
<d>-0.06911</d>
<d>-0.0569</d>
<d>-0.04469</d>
<d>-0.0508</d>
<d>-0.04469</d>
<d>-0.04469</d>
<d>-0.03859</d>
<d>-0.04469</d>
<d>-0.04469</d>
<d>-0.03859</d>
<d>-0.0508</d>
<d>-0.0569</d>
<d>-0.0569</d>
<d>-0.06911</d>
<d>-0.0569</d>
<d>-0.063</d>
<d>-0.06911</d>
<d>-0.0508</d>
<d>-0.06911</d>
<d>-0.0508</d>
<d>-0.0508</d>
<d>-0.0569</d>
<d>-0.0508</d>
<d>-0.0508</d>
<d>-0.0508</d>
<d>-0.0508</d>
<d>-0.0508</d>
<d>-0.03859</d>
<d>-0.03859</d>
<d>-0.03859</d>
<d>-0.03859</d>
<d>-0.04469</d>
<d>-0.03859</d>
<d>-0.0508</d>
<d>-0.04469</d>
<d>-0.04469</d>
<d>-0.04469</d>
<d>-0.04469</d>
<d>-0.0569</d>
<d>-0.0569</d>
<d>-0.063</d>
<d>-0.06911</d>
<d>-0.0569</d>
<d>-0.0569</d>
<d>-0.0569</d>
<d>-0.04469</d>
<d>-0.0508</d>
<d>-0.0508</d>
<d>-0.0569</d>
<d>-0.06911</d>
<d>-0.0508</d>
<d>-0.0508</d>
<d>-0.04469</d>
<d>-0.04469</d>
<d>-0.0569</d>
<d>-0.04469</d>
<d>-0.0508</d>
<d>-0.04469</d>
<d>-0.04469</d>
<d>-0.04469</d>
<d>-0.03859</d>
<d>-0.04469</d>
<d>-0.04469</d>
<d>-0.04469</d>
<d>-0.0569</d>
<d>-0.04469</d>
<d>-0.0569</d>
<d>-0.0508</d>
<d>-0.04469</d>
<d>-0.0508</d>
<d>-0.03859</d>
<d>-0.0508</d>
<d>-0.0508</d>
<d>-0.03859</d>
<d>-0.0508</d>
<d>-0.0508</d>
<d>-0.063</d>
<d>-0.0569</d>
<d>-0.04469</d>
<d>-0.0508</d>
<d>-0.03248</d>
<d>-0.03859</d>
<d>-0.04469</d>
<d>-0.03859</d>
<d>-0.04469</d>
<d>-0.0508</d>
<d>-0.0569</d>
<d>-0.0508</d>
<d>-0.04469</d>
<d>-0.03859</d>
<d>-0.03859</d>
<d>-0.02638</d>
<d>-0.03859</d>
<d>-0.03248</d>
<d>-0.03859</d>
<d>-0.04469</d>
<d>-0.03248</d>
<d>-0.03859</d>
<d>-0.03859</d>
<d>-0.03859</d>
<d>-0.04469</d>
<d>-0.03248</d>
<d>-0.04469</d>
<d>-0.03859</d>
<d>-0.03859</d>
<d>-0.03248</d>
<d>-0.02028</d>
<d>-0.03859</d>
<d>-0.03248</d>
<d>-0.0508</d>
<d>-0.04469</d>
<d>-0.03248</d>
<d>-0.04469</d>
<d>-0.04469</d>
<d>-0.03248</d>
<d>-0.04469</d>
<d>-0.03248</d>
<d>-0.03859</d>
<d>-0.03248</d>
<d>-0.02638</d>
<d>-0.03859</d>
<d>-0.03248</d>
<d>-0.04469</d>
<d>-0.0508</d>
<d>-0.04469</d>
<d>-0.04469</d>
<d>-0.03859</d>
<d>-0.03248</d>
<d>-0.03859</d>
<d>-0.03248</d>
<d>-0.03859</d>
<d>-0.03248</d>
<d>-0.03859</d>
<d>-0.03859</d>
<d>-0.03859</d>
<d>-0.03859</d>
<d>-0.03859</d>
<d>-0.03859</d>
<d>-0.04469</d>
<d>-0.04469</d>
<d>-0.0508</d>
<d>-0.0569</d>
<d>-0.03859</d>
<d>-0.03859</d>
<d>-0.03248</d>
<d>-0.02638</d>
<d>-0.03248</d>
<d>-0.02638</d>
<d>-0.04469</d>
<d>-0.04469</d>
<d>-0.03859</d>
<d>-0.04469</d>
<d>-0.03859</d>
<d>-0.0508</d>
<d>-0.0508</d>
<d>-0.04469</d>
<d>-0.04469</d>
<d>-0.03859</d>
<d>-0.04469</d>
<d>-0.03859</d>
<d>-0.04469</d>
<d>-0.03859</d>
<d>-0.03248</d>
<d>-0.04469</d>
<d>-0.04469</d>
<d>-0.03248</d>
<d>-0.02638</d>
<d>-0.01417</d>
<d>-0.02028</d>
<d>-0.02028</d>
<d>-0.00807</d>
<d>-0.01417</d>
<d>-0.00807</d>
<d>-0.02638</d>
<d>-0.02028</d>
<d>-0.02028</d>
<d>-0.02638</d>
<d>-0.03248</d>
<d>-0.03859</d>
<d>-0.03859</d>
<d>-0.02638</d>
<d>-0.02638</d>
<d>-0.03248</d>
<d>-0.03248</d>
<d>-0.03248</d>
<d>-0.02638</d>
<d>-0.03248</d>
<d>-0.03248</d>
<d>-0.02638</d>
<d>-0.02638</d>
<d>-0.03248</d>
<d>-0.03248</d>
<d>-0.03859</d>
<d>-0.03859</d>
<d>-0.04469</d>
<d>-0.04469</d>
<d>-0.03859</d>
<d>-0.04469</d>
<d>-0.02028</d>
<d>-0.02638</d>
<d>-0.01417</d>
<d>-0.02028</d>
<d>-0.03248</d>
<d>-0.02638</d>
<d>-0.03248</d>
<d>-0.03248</d>
<d>-0.03859</d>
<d>-0.04469</d>
<d>-0.03248</d>
<d>-0.04469</d>
<d>-0.03248</d>
<d>-0.02638</d>
<d>-0.02638</d>
<d>-0.02028</d>
<d>-0.02028</d>
<d>-0.02028</d>
<d>-0.02028</d>
<d>-0.02028</d>
<d>-0.02028</d>
<d>-0.02638</d>
<d>-0.03859</d>
<d>-0.01417</d>
<d>-0.02028</d>
<d>-0.02638</d>
<d>-0.02638</d>
<d>-0.03248</d>
<d>-0.02638</d>
<d>-0.03859</d>
<d>-0.03248</d>
<d>-0.04469</d>
<d>-0.03859</d>
<d>-0.03859</d>
<d>-0.04469</d>
<d>-0.03248</d>
<d>-0.02638</d>
<d>-0.03248</d>
<d>-0.02638</d>
<d>-0.02638</d>
<d>-0.01417</d>
<d>-0.02028</d>
<d>-0.02028</d>
<d>-0.01417</d>
<d>-0.01417</d>
<d>-0.02028</d>
<d>-0.01417</d>
<d>-0.02638</d>
<d>-0.02028</d>
<d>-0.02028</d>
<d>-0.03248</d>
<d>-0.02028</d>
<d>-0.02028</d>
<d>-0.02028</d>
<d>-0.02638</d>
<d>-0.02638</d>
<d>-0.02028</d>
<d>-0.03248</d>
<d>-0.02638</d>
<d>-0.02028</d>
<d>-0.02638</d>
<d>-0.02638</d>
<d>-0.03248</d>
<d>-0.03248</d>
<d>-0.01417</d>
<d>-0.02028</d>
<d>-0.00197</d>
<d>-0.00807</d>
<d>-0.00807</d>
<d>-0.02028</d>
<d>-0.03248</d>
<d>-0.03248</d>
<d>-0.02638</d>
<d>-0.03248</d>
<d>-0.01417</d>
<d>-0.02028</d>
<d>-0.01417</d>
<d>-0.00807</d>
<d>-0.00807</d>
<d>-0.00807</d>
<d>-0.02028</d>
<d>-0.01417</d>
<d>-0.02028</d>
<d>-0.02638</d>
<d>-0.02028</d>
<d>-0.03859</d>
<d>-0.03248</d>
<d>-0.02638</d>
<d>-0.03248</d>
<d>-0.02028</d>
<d>-0.02638</d>
<d>-0.03248</d>
<d>-0.02638</d>
<d>-0.03248</d>
<d>-0.02028</d>
<d>-0.02028</d>
<d>-0.01417</d>
<d>-0.00197</d>
<d>-0.00197</d>
<d>0.004136</d>
<d>0.004136</d>
<d>0.004136</d>
<d>-0.00197</d>
<d>-0.01417</d>
<d>-0.00807</d>
<d>-0.02028</d>
<d>-0.02028</d>
<d>-0.00807</d>
<d>-0.02028</d>
<d>-0.00807</d>
<d>-0.02028</d>
<d>-0.02638</d>
<d>-0.01417</d>
<d>-0.01417</d>
<d>-0.00807</d>
<d>-0.00197</d>
<d>-0.00197</d>
<d>-0.00197</d>
<d>-0.01417</d>
<d>-0.02028</d>
<d>-0.01417</d>
<d>-0.01417</d>
<d>-0.01417</d>
<d>-0.00807</d>
<d>-0.01417</d>
<d>-0.00197</d>
<d>-0.02028</d>
<d>-0.02028</d>
<d>-0.01417</d>
<d>-0.01417</d>
<d>-0.00807</d>
<d>-0.02028</d>
<d>-0.00807</d>
<d>-0.01417</d>
<d>-0.02638</d>
<d>-0.02028</d>
<d>-0.02028</d>
<d>-0.01417</d>
<d>-0.02028</d>
<d>-0.02028</d>
<d>-0.02028</d>
<d>-0.02028</d>
<d>-0.02028</d>
<d>-0.00807</d>
<d>-0.02028</d>
<d>-0.01417</d>
<d>-0.02028</d>
<d>-0.02028</d>
<d>-0.01417</d>
<d>-0.02638</d>
<d>-0.02028</d>
<d>-0.02028</d>
<d>-0.03248</d>
<d>-0.03248</d>
<d>-0.03248</d>
<d>-0.03248</d>
<d>-0.03248</d>
<d>-0.02638</d>
<d>-0.02028</d>
<d>-0.02638</d>
<d>-0.01417</d>
<d>-0.00807</d>
<d>-0.01417</d>
<d>-0.00807</d>
<d>-0.02638</d>
<d>-0.02638</d>
<d>-0.01417</d>
<d>-0.02028</d>
<d>-0.01417</d>
<d>-0.01417</d>
<d>-0.01417</d>
<d>-0.00807</d>
<d>-0.00197</d>
<d>0.004136</d>
<d>-0.00807</d>
<d>-0.01417</d>
<d>-0.02028</d>
<d>-0.02638</d>
<d>-0.03248</d>
<d>-0.02638</d>
<d>-0.02638</d>
<d>-0.01417</d>
<d>-0.02638</d>
<d>-0.03248</d>
<d>-0.02028</d>
<d>-0.01417</d>
<d>-0.00197</d>
<d>-0.02028</d>
<d>-0.02028</d>
<d>-0.00807</d>
<d>-0.01417</d>
<d>-0.00807</d>
<d>-0.00807</d>
<d>-0.00807</d>
<d>-0.00197</d>
<d>-0.01417</d>
<d>-0.00197</d>
<d>-0.00807</d>
<d>-0.01417</d>
<d>-0.00807</d>
<d>-0.01417</d>
<d>-0.00807</d>
<d>-0.01417</d>
<d>-0.00807</d>
<d>-0.00197</d>
<d>-0.00197</d>
<d>0.004136</d>
<d>-0.00807</d>
<d>-0.02028</d>
<d>-0.02028</d>
<d>-0.02028</d>
<d>-0.02028</d>
<d>-0.00807</d>
<d>-0.01417</d>
<d>-0.00807</d>
<d>-0.02028</d>
<d>-0.01417</d>
<d>-0.00807</d>
<d>-0.00197</d>
<d>-0.00197</d>
<d>-0.00807</d>
<d>-0.02028</d>
<d>-0.00807</d>
<d>-0.02028</d>
<d>-0.02028</d>
<d>-0.02028</d>
<d>-0.02028</d>
<d>-0.00807</d>
<d>-0.01417</d>
<d>-0.00807</d>
<d>-0.02028</d>
<d>-0.02028</d>
<d>-0.02028</d>
<d>-0.02638</d>
<d>-0.01417</d>
<d>-0.01417</d>
<d>-0.00807</d>
<d>0.004136</d>
<d>0.004136</d>
<d>0.004136</d>
<d>0.004136</d>
<d>-0.01417</d>
<d>-0.00807</d>
<d>-0.00807</d>
<d>-0.00807</d>
<d>0.004136</d>
<d>-0.00807</d>
<d>-0.00197</d>
<d>-0.01417</d>
<d>-0.03248</d>
<d>-0.02028</d>
<d>-0.02638</d>
<d>-0.02028</d>
<d>-0.02638</d>
<d>-0.03248</d>
<d>-0.01417</d>
<d>-0.02638</d>
<d>-0.02028</d>
<d>-0.01417</d>
<d>-0.02028</d>
<d>-0.01417</d>
<d>-0.02028</d>
<d>-0.00807</d>
<d>0.004136</d>
<d>0.004136</d>
<d>-0.00807</d>
<d>-0.01417</d>
<d>-0.01417</d>
<d>0.004136</d>
<d>-0.00197</d>
<d>0.004136</d>
<d>-0.00197</d>
<d>-0.00807</d>
<d>-0.00807</d>
<d>-0.02028</d>
<d>-0.01417</d>
<d>-0.01417</d>
<d>-0.02028</d>
<d>-0.02028</d>
<d>-0.02638</d>
<d>-0.02028</d>
<d>-0.02028</d>
<d>-0.02638</d>
<d>-0.00807</d>
<d>-0.00807</d>
<d>0.004136</d>
<d>0.004136</d>
<d>-0.01417</d>
<d>-0.00197</d>
<d>-0.01417</d>
<d>-0.01417</d>
<d>-0.01417</d>
<d>-0.01417</d>
<d>-0.00807</d>
<d>-0.01417</d>
<d>-0.01417</d>
<d>-0.00197</d>
<d>-0.00807</d>
<d>-0.00197</d>
<d>-0.00807</d>
<d>-0.00807</d>
<d>-0.00807</d>
<d>-0.01417</d>
<d>-0.00807</d>
<d>-0.00807</d>
<d>-0.01417</d>
<d>-0.00807</d>
<d>-0.02028</d>
<d>-0.02028</d>
<d>-0.01417</d>
<d>-0.02028</d>
<d>-0.01417</d>
<d>-0.00807</d>
<d>0.004136</d>
<d>-0.00197</d>
<d>-0.00807</d>
<d>0.004136</d>
<d>-0.00807</d>
<d>-0.02028</d>
<d>-0.00807</d>
<d>-0.00197</d>
<d>-0.00197</d>
<d>-0.00807</d>
<d>-0.01417</d>
<d>0.004136</d>
<d>-0.00807</d>
<d>-0.00197</d>
<d>-0.01417</d>
<d>-0.02028</d>
<d>-0.00807</d>
<d>-0.00807</d>
</Subcolumn>
</YColumn>
<YColumn Width="103" Decimals="6" Subcolumns="1">
<Title>15</Title>
<Subcolumn>
<d>0.00721</d>
<d>-0.004997</d>
<d>-0.011101</d>
<d>0.001106</d>
<d>-0.004997</d>
<d>-0.004997</d>
<d>0.001106</d>
<d>0.013313</d>
<d>0.001106</d>
<d>0.001106</d>
<d>0.001106</d>
<d>0.001106</d>
<d>0.00721</d>
<d>-0.011101</d>
<d>0.013313</d>
<d>0.019417</d>
<d>0.00721</d>
<d>-0.011101</d>
<d>-0.004997</d>
<d>-0.011101</d>
<d>-0.011101</d>
<d>0.001106</d>
<d>0.013313</d>
<d>-0.004997</d>
<d>0.013313</d>
<d>0.013313</d>
<d>0.019417</d>
<d>0.00721</d>
<d>0.001106</d>
<d>0.00721</d>
<d>-0.004997</d>
<d>-0.011101</d>
<d>0.001106</d>
<d>-0.011101</d>
<d>-0.017204</d>
<d>0.001106</d>
<d>-0.017204</d>
<d>-0.011101</d>
<d>-0.004997</d>
<d>-0.011101</d>
<d>-0.011101</d>
<d>0.001106</d>
<d>-0.004997</d>
<d>-0.017204</d>
<d>-0.023308</d>
<d>-0.023308</d>
<d>-0.023308</d>
<d>-0.011101</d>
<d>0.001106</d>
<d>-0.011101</d>
<d>-0.023308</d>
<d>-0.017204</d>
<d>-0.017204</d>
<d>-0.011101</d>
<d>0.00721</d>
<d>0.019417</d>
<d>0.00721</d>
<d>0.00721</d>
<d>-0.004997</d>
<d>0.001106</d>
<d>-0.011101</d>
<d>-0.004997</d>
<d>0.001106</d>
<d>0.001106</d>
<d>0.019417</d>
<d>0.013313</d>
<d>0.019417</d>
<d>0.013313</d>
<d>0.013313</d>
<d>0.013313</d>
<d>0.00721</d>
<d>0.00721</d>
<d>0.001106</d>
<d>-0.004997</d>
<d>-0.017204</d>
<d>-0.004997</d>
<d>-0.004997</d>
<d>-0.004997</d>
<d>0.00721</d>
<d>-0.004997</d>
<d>-0.017204</d>
<d>-0.023308</d>
<d>-0.029411</d>
<d>-0.029411</d>
<d>-0.011101</d>
<d>-0.004997</d>
<d>-0.017204</d>
<d>-0.017204</d>
<d>-0.023308</d>
<d>-0.011101</d>
<d>-0.011101</d>
<d>0.00721</d>
<d>0.00721</d>
<d>0.019417</d>
<d>0.013313</d>
<d>0.001106</d>
<d>-0.017204</d>
<d>-0.011101</d>
<d>0.001106</d>
<d>0.001106</d>
<d>0.001106</d>
<d>0.001106</d>
<d>0.001106</d>
<d>-0.004997</d>
<d>-0.004997</d>
<d>0.001106</d>
<d>-0.017204</d>
<d>-0.011101</d>
<d>-0.017204</d>
<d>-0.023308</d>
<d>-0.004997</d>
<d>0.013313</d>
<d>0.00721</d>
<d>0.00721</d>
<d>0.00721</d>
<d>0.00721</d>
<d>0.013313</d>
<d>0.013313</d>
<d>0.019417</d>
<d>0.00721</d>
<d>0.00721</d>
<d>0.00721</d>
<d>0.00721</d>
<d>0.013313</d>
<d>0.019417</d>
<d>0.00721</d>
<d>0.00721</d>
<d>0.001106</d>
<d>0.001106</d>
<d>0.001106</d>
<d>-0.004997</d>
<d>-0.011101</d>
<d>-0.011101</d>
<d>-0.004997</d>
<d>0.001106</d>
<d>-0.011101</d>
<d>-0.011101</d>
<d>-0.023308</d>
<d>-0.017204</d>
<d>-0.004997</d>
<d>0.00721</d>
<d>0.013313</d>
<d>0.00721</d>
<d>0.019417</d>
<d>0.013313</d>
<d>0.00721</d>
<d>-0.004997</d>
<d>0.00721</d>
<d>0.00721</d>
<d>0.001106</d>
<d>0.013313</d>
<d>0.00721</d>
<d>0.00721</d>
<d>0.00721</d>
<d>0.00721</d>
<d>0.00721</d>
<d>0.001106</d>
<d>-0.011101</d>
<d>-0.011101</d>
<d>-0.029411</d>
<d>-0.017204</d>
<d>-0.004997</d>
<d>0.00721</d>
<d>0.00721</d>
<d>0.00721</d>
<d>0.001106</d>
<d>0.00721</d>
<d>-0.004997</d>
<d>-0.011101</d>
<d>-0.011101</d>
<d>-0.011101</d>
<d>-0.004997</d>
<d>0.001106</d>
<d>-0.004997</d>
<d>-0.004997</d>
<d>0.00721</d>
<d>0.00721</d>
<d>0.001106</d>
<d>0.019417</d>
<d>0.019417</d>
<d>0.013313</d>
<d>0.013313</d>
<d>-0.004997</d>
<d>0.00721</d>
<d>0.00721</d>
<d>0.001106</d>
<d>-0.004997</d>
<d>-0.017204</d>
<d>-0.011101</d>
<d>-0.004997</d>
<d>0.001106</d>
<d>0.001106</d>
<d>0.001106</d>
<d>0.001106</d>
<d>0.013313</d>
<d>0.00721</d>
<d>0.00721</d>
<d>0.013313</d>
<d>0.001106</d>
<d>-0.017204</d>
<d>-0.011101</d>
<d>-0.011101</d>
<d>-0.011101</d>
<d>-0.004997</d>
<d>-0.011101</d>
<d>-0.011101</d>
<d>-0.004997</d>
<d>0.001106</d>
<d>0.00721</d>
<d>-0.017204</d>
<d>-0.023308</d>
<d>-0.017204</d>
<d>-0.004997</d>
<d>0.00721</d>
<d>-0.004997</d>
<d>0.013313</d>
<d>0.02552</d>
<d>0.019417</d>
<d>0.013313</d>
<d>-0.004997</d>
<d>0.001106</d>
<d>-0.004997</d>
<d>0.013313</d>
<d>0.013313</d>
<d>0.001106</d>
<d>0.013313</d>
<d>0.013313</d>
<d>0.001106</d>
<d>0.001106</d>
<d>-0.004997</d>
<d>-0.011101</d>
<d>-0.011101</d>
<d>-0.004997</d>
<d>0.00721</d>
<d>0.00721</d>
<d>0.001106</d>
<d>0.001106</d>
<d>-0.011101</d>
<d>0.001106</d>
<d>0.00721</d>
<d>0.001106</d>
<d>-0.004997</d>
<d>0.00721</d>
<d>-0.004997</d>
<d>0.00721</d>
<d>0.00721</d>
<d>0.013313</d>
<d>0.013313</d>
<d>0.00721</d>
<d>0.00721</d>
<d>-0.004997</d>
<d>0.001106</d>
<d>-0.011101</d>
<d>0.001106</d>
<d>0.001106</d>
<d>-0.004997</d>
<d>-0.011101</d>
<d>0.001106</d>
<d>0.001106</d>
<d>0.00721</d>
<d>0.013313</d>
<d>0.019417</d>
<d>0.02552</d>
<d>-0.004997</d>
<d>0.001106</d>
<d>0.00721</d>
<d>-0.004997</d>
<d>0.001106</d>
<d>-0.004997</d>
<d>0.00721</d>
<d>0.00721</d>
<d>-0.004997</d>
<d>0.00721</d>
<d>0.001106</d>
<d>-0.011101</d>
<d>-0.004997</d>
<d>-0.011101</d>
<d>-0.011101</d>
<d>0.013313</d>
<d>0.00721</d>
<d>0.001106</d>
<d>0.00721</d>
<d>0.001106</d>
<d>-0.004997</d>
<d>0.013313</d>
<d>0.019417</d>
<d>0.013313</d>
<d>0.00721</d>
<d>0.001106</d>
<d>0.001106</d>
<d>0.00721</d>
<d>0.001106</d>
<d>0.001106</d>
<d>0.001106</d>
<d>0.001106</d>
<d>-0.004997</d>
<d>0.001106</d>
<d>0.00721</d>
<d>0.019417</d>
<d>0.02552</d>
<d>0.013313</d>
<d>0.013313</d>
<d>0.019417</d>
<d>0.019417</d>
<d>0.013313</d>
<d>0.013313</d>
<d>0.019417</d>
<d>0.013313</d>
<d>0.001106</d>
<d>0.00721</d>
<d>0.00721</d>
<d>0.001106</d>
<d>-0.017204</d>
<d>-0.023308</d>
<d>-0.029411</d>
<d>-0.023308</d>
<d>-0.004997</d>
<d>-0.004997</d>
<d>0.00721</d>
<d>0.001106</d>
<d>-0.004997</d>
<d>-0.017204</d>
<d>-0.023308</d>
<d>-0.011101</d>
<d>-0.004997</d>
<d>0.001106</d>
<d>0.00721</d>
<d>0.001106</d>
<d>0.013313</d>
<d>0.02552</d>
<d>0.037727</d>
<d>0.031624</d>
<d>0.013313</d>
<d>0.001106</d>
<d>-0.004997</d>
<d>-0.011101</d>
<d>-0.011101</d>
<d>0.001106</d>
<d>0.013313</d>
<d>0.00721</d>
<d>0.001106</d>
<d>-0.011101</d>
<d>0.001106</d>
<d>-0.004997</d>
<d>-0.011101</d>
<d>-0.004997</d>
<d>-0.011101</d>
<d>-0.011101</d>
<d>-0.004997</d>
<d>-0.011101</d>
<d>0.001106</d>
<d>0.001106</d>
<d>0.00721</d>
<d>-0.004997</d>
<d>-0.004997</d>
<d>-0.011101</d>
<d>-0.011101</d>
<d>-0.004997</d>
<d>0.001106</d>
<d>0.001106</d>
<d>0.001106</d>
<d>-0.011101</d>
<d>-0.023308</d>
<d>-0.011101</d>
<d>-0.004997</d>
<d>0.001106</d>
<d>0.00721</d>
<d>0.013313</d>
<d>0.001106</d>
<d>0.013313</d>
<d>0.013313</d>
<d>-0.004997</d>
<d>-0.004997</d>
<d>-0.017204</d>
<d>-0.004997</d>
<d>0.013313</d>
<d>-0.004997</d>
<d>-0.011101</d>
<d>-0.004997</d>
<d>0.001106</d>
<d>-0.004997</d>
<d>0.00721</d>
<d>0.001106</d>
<d>0.00721</d>
<d>-0.004997</d>
<d>0.013313</d>
<d>0.001106</d>
<d>-0.004997</d>
<d>0.00721</d>
<d>-0.011101</d>
<d>-0.004997</d>
<d>0.00721</d>
<d>0.001106</d>
<d>0.013313</d>
<d>0.00721</d>
<d>-0.011101</d>
<d>-0.004997</d>
<d>-0.023308</d>
<d>-0.023308</d>
<d>-0.023308</d>
<d>-0.023308</d>
<d>-0.316277</d>
<d>-0.725212</d>
<d>-0.517693</d>
<d>-0.120964</d>
<d>-0.120964</d>
<d>-0.09655</d>
<d>0.001106</d>
<d>0.043831</d>
<d>0.056038</d>
<d>0.056038</d>
<d>0.056038</d>
<d>0.062141</d>
<d>0.037727</d>
<d>0.037727</d>
<d>0.037727</d>
<d>0.02552</d>
<d>0.031624</d>
<d>0.037727</d>
<d>0.037727</d>
<d>0.043831</d>
<d>0.037727</d>
<d>0.037727</d>
<d>0.031624</d>
<d>0.02552</d>
<d>0.019417</d>
<d>0.019417</d>
<d>0.02552</d>
<d>0.013313</d>
<d>0.013313</d>
<d>0.02552</d>
<d>0.019417</d>
<d>0.013313</d>
<d>0.013313</d>
<d>0.013313</d>
<d>0.019417</d>
<d>0.019417</d>
<d>0.019417</d>
<d>0.001106</d>
<d>0.00721</d>
<d>0.019417</d>
<d>0.013313</d>
<d>0.00721</d>
<d>0.001106</d>
<d>-0.004997</d>
<d>0.00721</d>
<d>0.001106</d>
<d>-0.017204</d>
<d>-0.004997</d>
<d>0.001106</d>
<d>-0.011101</d>
<d>-0.004997</d>
<d>0.00721</d>
<d>0.02552</d>
<d>0.037727</d>
<d>-0.041618</d>
<d>-0.114861</d>
<d>-0.133171</d>
<d>-0.120964</d>
<d>-0.09655</d>
<d>-0.066032</d>
<d>-0.066032</d>
<d>-0.053825</d>
<d>-0.047722</d>
<d>-0.059929</d>
<d>-0.059929</d>
<d>-0.029411</d>
<d>-0.041618</d>
<d>-0.047722</d>
<d>-0.035515</d>
<d>-0.035515</d>
<d>-0.023308</d>
<d>-0.029411</d>
<d>-0.035515</d>
<d>-0.047722</d>
<d>-0.053825</d>
<d>-0.066032</d>
<d>-0.078239</d>
<d>-0.090446</d>
<d>-0.102654</d>
<d>-0.108757</d>
<d>-0.108757</d>
<d>-0.114861</d>
<d>-0.114861</d>
<d>-0.127068</d>
<d>-0.133171</d>
<d>-0.127068</d>
<d>-0.139275</d>
<d>-0.145378</d>
<d>-0.145378</d>
<d>-0.157585</d>
<d>-0.151482</d>
<d>-0.157585</d>
<d>-0.157585</d>
<d>-0.151482</d>
<d>-0.163689</d>
<d>-0.169792</d>
<d>-0.163689</d>
<d>-0.163689</d>
<d>-0.175896</d>
<d>-0.181999</d>
<d>-0.188103</d>
<d>-0.194206</d>
<d>-0.20031</d>
<d>-0.181999</d>
<d>-0.181999</d>
<d>-0.188103</d>
<d>-0.20031</d>
<d>-0.194206</d>
<d>-0.20031</d>
<d>-0.194206</d>
<d>-0.212517</d>
<d>-0.212517</d>
<d>-0.21862</d>
<d>-0.21862</d>
<d>-0.212517</d>
<d>-0.194206</d>
<d>-0.20031</d>
<d>-0.212517</d>
<d>-0.20031</d>
<d>-0.20031</d>
<d>-0.212517</d>
<d>-0.212517</d>
<d>-0.212517</d>
<d>-0.212517</d>
<d>-0.21862</d>
<d>-0.206413</d>
<d>-0.194206</d>
<d>-0.188103</d>
<d>-0.181999</d>
<d>-0.194206</d>
<d>-0.20031</d>
<d>-0.188103</d>
<d>-0.206413</d>
<d>-0.212517</d>
<d>-0.20031</d>
<d>-0.194206</d>
<d>-0.175896</d>
<d>-0.175896</d>
<d>-0.169792</d>
<d>-0.175896</d>
<d>-0.175896</d>
<d>-0.188103</d>
<d>-0.20031</d>
<d>-0.20031</d>
<d>-0.188103</d>
<d>-0.169792</d>
<d>-0.181999</d>
<d>-0.175896</d>
<d>-0.175896</d>
<d>-0.169792</d>
<d>-0.175896</d>
<d>-0.175896</d>
<d>-0.175896</d>
<d>-0.181999</d>
<d>-0.169792</d>
<d>-0.181999</d>
<d>-0.175896</d>
<d>-0.175896</d>
<d>-0.175896</d>
<d>-0.157585</d>
<d>-0.151482</d>
<d>-0.151482</d>
<d>-0.163689</d>
<d>-0.169792</d>
<d>-0.175896</d>
<d>-0.163689</d>
<d>-0.163689</d>
<d>-0.157585</d>
<d>-0.169792</d>
<d>-0.163689</d>
<d>-0.151482</d>
<d>-0.145378</d>
<d>-0.145378</d>
<d>-0.139275</d>
<d>-0.145378</d>
<d>-0.139275</d>
<d>-0.145378</d>
<d>-0.163689</d>
<d>-0.163689</d>
<d>-0.133171</d>
<d>-0.133171</d>
<d>-0.120964</d>
<d>-0.127068</d>
<d>-0.139275</d>
<d>-0.151482</d>
<d>-0.151482</d>
<d>-0.145378</d>
<d>-0.139275</d>
<d>-0.133171</d>
<d>-0.133171</d>
<d>-0.127068</d>
<d>-0.120964</d>
<d>-0.108757</d>
<d>-0.114861</d>
<d>-0.133171</d>
<d>-0.139275</d>
<d>-0.127068</d>
<d>-0.114861</d>
<d>-0.114861</d>
<d>-0.120964</d>
<d>-0.108757</d>
<d>-0.114861</d>
<d>-0.102654</d>
<d>-0.120964</d>
<d>-0.120964</d>
<d>-0.114861</d>
<d>-0.120964</d>
<d>-0.102654</d>
<d>-0.108757</d>
<d>-0.127068</d>
<d>-0.133171</d>
<d>-0.120964</d>
<d>-0.102654</d>
<d>-0.108757</d>
<d>-0.114861</d>
<d>-0.108757</d>
<d>-0.102654</d>
<d>-0.090446</d>
<d>-0.084343</d>
<d>-0.084343</d>
<d>-0.09655</d>
<d>-0.09655</d>
<d>-0.084343</d>
<d>-0.09655</d>
<d>-0.078239</d>
<d>-0.090446</d>
<d>-0.09655</d>
<d>-0.09655</d>
<d>-0.102654</d>
<d>-0.108757</d>
<d>-0.090446</d>
<d>-0.09655</d>
<d>-0.084343</d>
<d>-0.078239</d>
<d>-0.078239</d>
<d>-0.078239</d>
<d>-0.072136</d>
<d>-0.072136</d>
<d>-0.072136</d>
<d>-0.072136</d>
<d>-0.072136</d>
<d>-0.066032</d>
<d>-0.053825</d>
<d>-0.047722</d>
<d>-0.047722</d>
<d>-0.059929</d>
<d>-0.041618</d>
<d>-0.053825</d>
<d>-0.059929</d>
<d>-0.059929</d>
<d>-0.059929</d>
<d>-0.066032</d>
<d>-0.084343</d>
<d>-0.108757</d>
<d>-0.09655</d>
<d>-0.072136</d>
<d>-0.084343</d>
<d>-0.078239</d>
<d>-0.066032</d>
<d>-0.072136</d>
<d>-0.078239</d>
<d>-0.084343</d>
<d>-0.084343</d>
<d>-0.066032</d>
<d>-0.072136</d>
<d>-0.072136</d>
<d>-0.072136</d>
<d>-0.084343</d>
<d>-0.072136</d>
<d>-0.066032</d>
<d>-0.066032</d>
<d>-0.059929</d>
<d>-0.059929</d>
<d>-0.053825</d>
<d>-0.035515</d>
<d>-0.047722</d>
<d>-0.053825</d>
<d>-0.059929</d>
<d>-0.059929</d>
<d>-0.066032</d>
<d>-0.072136</d>
<d>-0.078239</d>
<d>-0.059929</d>
<d>-0.059929</d>
<d>-0.072136</d>
<d>-0.066032</d>
<d>-0.072136</d>
<d>-0.053825</d>
<d>-0.041618</d>
<d>-0.029411</d>
<d>-0.029411</d>
<d>-0.047722</d>
<d>-0.047722</d>
<d>-0.059929</d>
<d>-0.041618</d>
<d>-0.047722</d>
<d>-0.053825</d>
<d>-0.047722</d>
<d>-0.047722</d>
<d>-0.047722</d>
<d>-0.047722</d>
<d>-0.053825</d>
<d>-0.053825</d>
<d>-0.047722</d>
<d>-0.047722</d>
<d>-0.047722</d>
<d>-0.047722</d>
<d>-0.041618</d>
<d>-0.041618</d>
<d>-0.053825</d>
<d>-0.041618</d>
<d>-0.041618</d>
<d>-0.053825</d>
<d>-0.053825</d>
<d>-0.053825</d>
<d>-0.047722</d>
<d>-0.059929</d>
<d>-0.059929</d>
<d>-0.059929</d>
<d>-0.066032</d>
<d>-0.066032</d>
<d>-0.053825</d>
<d>-0.047722</d>
<d>-0.023308</d>
<d>-0.017204</d>
<d>-0.035515</d>
<d>-0.041618</d>
<d>-0.029411</d>
<d>-0.041618</d>
<d>-0.041618</d>
<d>-0.041618</d>
<d>-0.041618</d>
<d>-0.035515</d>
<d>-0.023308</d>
<d>-0.029411</d>
<d>-0.035515</d>
<d>-0.035515</d>
<d>-0.041618</d>
<d>-0.041618</d>
<d>-0.029411</d>
<d>-0.017204</d>
<d>-0.023308</d>
<d>-0.035515</d>
<d>-0.035515</d>
<d>-0.041618</d>
<d>-0.029411</d>
<d>-0.017204</d>
<d>-0.029411</d>
<d>-0.041618</d>
<d>-0.041618</d>
<d>-0.059929</d>
<d>-0.066032</d>
<d>-0.029411</d>
<d>-0.029411</d>
<d>-0.041618</d>
<d>-0.041618</d>
<d>-0.047722</d>
<d>-0.023308</d>
<d>-0.029411</d>
<d>-0.035515</d>
<d>-0.035515</d>
<d>-0.035515</d>
<d>-0.041618</d>
<d>-0.035515</d>
<d>-0.047722</d>
<d>-0.053825</d>
<d>-0.041618</d>
<d>-0.041618</d>
<d>-0.035515</d>
<d>-0.047722</d>
<d>-0.053825</d>
<d>-0.041618</d>
<d>-0.041618</d>
<d>-0.029411</d>
<d>-0.035515</d>
<d>-0.023308</d>
<d>-0.029411</d>
<d>-0.041618</d>
<d>-0.041618</d>
<d>-0.053825</d>
<d>-0.047722</d>
<d>-0.047722</d>
<d>-0.041618</d>
<d>-0.041618</d>
<d>-0.041618</d>
<d>-0.041618</d>
<d>-0.035515</d>
<d>-0.041618</d>
<d>-0.023308</d>
<d>-0.023308</d>
<d>-0.035515</d>
<d>-0.023308</d>
<d>-0.029411</d>
<d>-0.041618</d>
<d>-0.023308</d>
<d>-0.029411</d>
<d>-0.017204</d>
<d>-0.023308</d>
<d>-0.035515</d>
<d>-0.035515</d>
<d>-0.035515</d>
<d>-0.035515</d>
<d>-0.023308</d>
<d>0.001106</d>
<d>-0.004997</d>
<d>0.00721</d>
<d>-0.004997</d>
<d>-0.011101</d>
<d>-0.004997</d>
<d>-0.017204</d>
<d>-0.004997</d>
<d>-0.035515</d>
<d>-0.023308</d>
<d>-0.035515</d>
<d>-0.029411</d>
<d>-0.004997</d>
<d>-0.011101</d>
<d>-0.011101</d>
<d>-0.004997</d>
<d>-0.017204</d>
<d>-0.017204</d>
<d>-0.017204</d>
<d>-0.017204</d>
<d>-0.023308</d>
<d>-0.011101</d>
<d>-0.017204</d>
<d>-0.029411</d>
<d>-0.023308</d>
<d>-0.029411</d>
<d>-0.035515</d>
<d>-0.017204</d>
<d>-0.023308</d>
<d>-0.029411</d>
<d>-0.017204</d>
<d>-0.011101</d>
<d>-0.017204</d>
<d>-0.004997</d>
<d>0.001106</d>
<d>-0.004997</d>
<d>-0.011101</d>
<d>-0.023308</d>
<d>-0.035515</d>
<d>-0.029411</d>
<d>-0.017204</d>
<d>-0.011101</d>
<d>-0.017204</d>
<d>-0.017204</d>
<d>-0.017204</d>
<d>-0.011101</d>
<d>-0.017204</d>
<d>-0.004997</d>
<d>-0.011101</d>
<d>-0.017204</d>
<d>0.001106</d>
<d>-0.011101</d>
<d>-0.023308</d>
<d>-0.035515</d>
<d>-0.017204</d>
<d>-0.017204</d>
<d>-0.017204</d>
<d>-0.017204</d>
<d>-0.029411</d>
<d>-0.035515</d>
<d>-0.029411</d>
<d>-0.029411</d>
<d>-0.017204</d>
<d>-0.011101</d>
<d>-0.011101</d>
<d>0.001106</d>
<d>-0.011101</d>
<d>-0.017204</d>
<d>-0.011101</d>
<d>-0.011101</d>
<d>0.001106</d>
<d>-0.004997</d>
<d>-0.023308</d>
<d>-0.017204</d>
<d>-0.011101</d>
<d>-0.011101</d>
<d>-0.023308</d>
<d>-0.023308</d>
<d>0.001106</d>
<d>0.001106</d>
<d>-0.004997</d>
<d>-0.004997</d>
<d>-0.004997</d>
<d>-0.004997</d>
<d>-0.011101</d>
<d>-0.011101</d>
<d>-0.004997</d>
<d>-0.004997</d>
<d>0.001106</d>
<d>0.001106</d>
<d>-0.017204</d>
<d>-0.011101</d>
<d>-0.017204</d>
<d>-0.023308</d>
<d>-0.017204</d>
<d>-0.011101</d>
<d>-0.004997</d>
<d>0.001106</d>
<d>0.013313</d>
<d>-0.004997</d>
<d>-0.004997</d>
<d>-0.011101</d>
<d>-0.004997</d>
<d>-0.017204</d>
<d>-0.023308</d>
<d>0.001106</d>
<d>0.00721</d>
<d>0.001106</d>
<d>-0.004997</d>
<d>-0.011101</d>
<d>-0.011101</d>
<d>-0.004997</d>
<d>-0.004997</d>
<d>-0.011101</d>
<d>-0.017204</d>
<d>-0.017204</d>
<d>-0.011101</d>
<d>-0.017204</d>
<d>-0.011101</d>
<d>0.00721</d>
<d>-0.011101</d>
<d>-0.011101</d>
<d>-0.004997</d>
<d>-0.023308</d>
<d>-0.029411</d>
<d>-0.023308</d>
<d>-0.004997</d>
<d>0.00721</d>
<d>0.001106</d>
<d>0.013313</d>
<d>0.013313</d>
<d>0.00721</d>
<d>0.00721</d>
<d>0.013313</d>
<d>0.00721</d>
<d>-0.004997</d>
<d>-0.023308</d>
<d>-0.029411</d>
<d>-0.029411</d>
<d>-0.011101</d>
<d>-0.017204</d>
<d>-0.017204</d>
<d>0.001106</d>
<d>0.001106</d>
<d>0.001106</d>
<d>0.00721</d>
<d>0.013313</d>
<d>0.019417</d>
<d>0.013313</d>
<d>0.001106</d>
<d>0.00721</d>
<d>0.001106</d>
<d>0.013313</d>
<d>0.02552</d>
<d>0.013313</d>
<d>0.013313</d>
<d>0.00721</d>
<d>-0.004997</d>
<d>0.001106</d>
<d>0.031624</d>
<d>0.019417</d>
<d>-0.004997</d>
<d>-0.017204</d>
<d>-0.011101</d>
<d>-0.017204</d>
<d>-0.017204</d>
<d>0.001106</d>
<d>-0.011101</d>
<d>-0.004997</d>
<d>-0.004997</d>
<d>0.001106</d>
<d>0.001106</d>
<d>-0.017204</d>
<d>0.001106</d>
<d>0.00721</d>
<d>-0.011101</d>
<d>0.001106</d>
<d>-0.004997</d>
<d>-0.011101</d>
<d>-0.011101</d>
<d>0.001106</d>
<d>0.001106</d>
<d>0.013313</d>
<d>0.013313</d>
<d>0.001106</d>
[truncated: 5,815,665 more chars]
