# Supplementary figures and images for: Sorting nexin-27 regulates AMPA receptor trafficking through the synaptic adhesion protein LRFN2
Source: eLife journal article supplement (doi:10.7554/elife.59432), 2021-07-12

FIGURE 5B

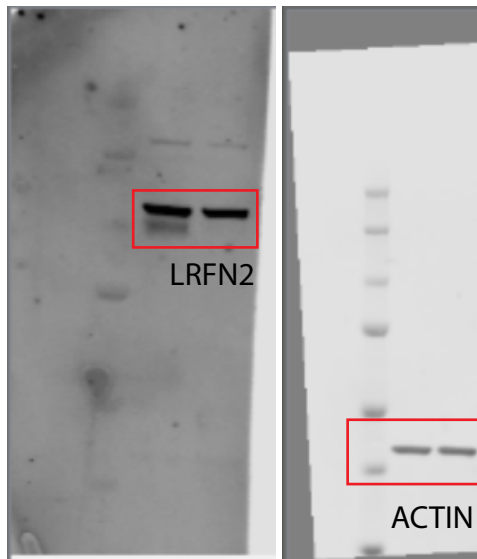

Supplement: fig5-data1 [file elife-59432-fig5-data1-v2.ai]
